# Supplementary material for: TUBA1A tubulinopathy mutants disrupt neuron morphogenesis and override XMAP215/Stu2 regulation of microtubule dynamics
Source: eLife. 2022 May 5;11:e76189. doi: 10.7554/eLife.76189 (PMC9236607; doi:10.7554/eLife.76189)
Supplement: Figure 1—source data 1. [file elife-76189-fig1-data1.xlsx]

## Sheet: WT 090619
WT neuron1 z stack			WT neuron2 z stack			WT neuron3 z stack			WT neuron4 z stack			WT neuron5 z stack
Distance_(microns)	Gray_Value		Distance_(microns)	Gray_Value		Distance_(microns)	Gray_Value		Distance_(microns)	Gray_Value		Distance_(microns)	Gray_Value
0	11652.6		0	3767.01		0	9124.61		0	3643.48		0	11720.3
0.1333	11803.3		0.1333	3761.47		0.1333	9642.22		0.1333	3653.04		0.1333	12108.3
0.2667	11940.8		0.2667	3749.25		0.2667	10183.6		0.2667	3644.07		0.2667	12249.9
0.4	12153.2		0.4	3776.95		0.4	10673		0.4	3647.65		0.4	12269.2
0.5333	12211.4		0.5333	3764.52		0.5333	11011.8		0.5333	3651.88		0.5333	12089.5
0.6667	12175.7		0.6667	3753.09		0.6667	11334.1		0.6667	3661.05		0.6667	11904.1
0.8	12176.7		0.8	3731.88		0.8	11598.1		0.8	3622.9		0.8	11741.2
0.9333	12190.4		0.9333	3730.16		0.9333	11981.3		0.9333	3641.11		0.9333	11734.7
1.0667	12328.3		1.0667	3728.2		1.0667	12304.9		1.0667	3642.18		1.0667	11748.6
1.2	12367		1.2	3743.88		1.2	12399.3		1.2	3662.26		1.2	11824.4
1.3333	12550.7		1.3333	3726.2		1.3333	12098.3		1.3333	3671.73		1.3333	11892.1
1.4667	12755.1		1.4667	3732.77		1.4667	11181.9		1.4667	3652.36		1.4667	12018
1.6	12976		1.6	3735.01		1.6	9903.9		1.6	3654.67		1.6	12208
1.7333	13237.7		1.7333	3787.64		1.7333	8852.99		1.7333	3671		1.7333	12315.9
1.8667	13289.9		1.8667	3745.41		1.8667	7778.75		1.8667	3644.62		1.8667	12303.8
2	13340.8		2	3750.03		2	7049.45		2	3643.82		2	12298.3
2.1333	13287.3		2.1333	3763.4		2.1333	6612.59		2.1333	3633.59		2.1333	12265.2
2.2667	13252.3		2.2667	3771.27		2.2667	6385.74		2.2667	3651.21		2.2667	12284.7
2.4	13246.6		2.4	3759.04		2.4	6166.54		2.4	3636.44		2.4	12309.7
2.5333	13254.1		2.5333	3736.98		2.5333	6016.85		2.5333	3614.54		2.5333	12284.4
2.6667	13230.9		2.6667	3713.9		2.6667	5954.31		2.6667	3601.78		2.6667	12220.1
2.8	13210.9		2.8	3711.48		2.8	5869.13		2.8	3591.69		2.8	11966.6
2.9333	13257.1		2.9333	3709.92		2.9333	5835.33		2.9333	3611.55		2.9333	11546.5
3.0667	13250.2		3.0667	3713.12		3.0667	5744.79		3.0667	3600.19		3.0667	11068
3.2	13190.3		3.2	3699.81		3.2	5678.97		3.2	3608.31		3.2	10571.4
3.3333	13144.1		3.3333	3726.51		3.3333	5659.1		3.3333	3606.2		3.3333	10210.3
3.4667	13192.9		3.4667	3733.84		3.4667	5730.92		3.4667	3636.7		3.4667	9941.43
3.6	13191.6		3.6	3715.5		3.6	5773.47		3.6	3623.14		3.6	9608.93
3.7333	13211.6		3.7333	3706.96		3.7333	5774.06		3.7333	3626.05		3.7333	9227.25
3.8667	13045.1		3.8667	3703.83		3.8667	5763.36		3.8667	3633.6		3.8667	8891.24
4	12906		4	3730.7		4	5807.01		4	3642.46		4	8650.18
4.1333	12842.5		4.1333	3708.23		4.1333	5876.41		4.1333	3639.11		4.1333	8376.98
4.2667	12914.5		4.2667	3715.89		4.2667	5888		4.2667	3621.36		4.2667	7993.33
4.4	13073.9		4.4	3706.98		4.4	5929.23		4.4	3617.67		4.4	7537.49
4.5333	13145.7		4.5333	3722.33		4.5333	5987.72		4.5333	3640.46		4.5333	7200.36
4.6667	13166.6		4.6667	3722.27		4.6667	5947.61		4.6667	3654.28		4.6667	6994.13
4.8	13182.1		4.8	3723.34		4.8	5900.77		4.8	3710.39		4.8	6833.97
4.9333	13171.4		4.9333	3710.14		4.9333	5827.92		4.9333	3775.17		4.9333	6743.38
5.0667	13184.7		5.0667	3713.28		5.0667	5808.66		5.0667	3837.64		5.0667	6631.02
5.2	13292.7		5.2	3733.02		5.2	5806.75		5.2	3833.62		5.2	6548.91
5.3333	13403.6		5.3333	3732.26		5.3333	5789.68		5.3333	3786.86		5.3333	6427.09
5.4667	13424.6		5.4667	3708.59		5.4667	5731.62		5.4667	3730.72		5.4667	6318.79
5.6	13508.8		5.6	3720.64		5.6	5708.1		5.6	3701.91		5.6	6257.66
5.7333	13513.9		5.7333	3711.25		5.7333	5672.99		5.7333	3704.19		5.7333	6245.27
5.8667	13481.7		5.8667	3710.7		5.8667	5729.71		5.8667	3685.37		5.8667	6273.08
6	13439.8		6	3713.13		6	5802.11		6	3656.78		6	6267.59
6.1333	13477.3		6.1333	3723.86		6.1333	5833		6.1333	3640.42		6.1333	6292.73
6.2667	13622.1		6.2667	3736.29		6.2667	5836.92		6.2667	3624.59		6.2667	6324.75
6.4	13692.8		6.4	3745.7		6.4	5823.4		6.4	3620.82		6.4	6298.25
6.5333	13806.9		6.5333	3735.11		6.5333	5772.15		6.5333	3633.92		6.5333	6171.89
6.6667	13814.6		6.6667	3745.52		6.6667	5760.46		6.6667	3638.18		6.6667	5999.54
6.8	13714.8		6.8	3734.97		6.8	5772.62		6.8	3649.87		6.8	5861.62
6.9333	13503.4		6.9333	3745.39		6.9333	5817.44		6.9333	3638.32		6.9333	5833.59
7.0667	13313.5		7.0667	3753.36		7.0667	5835.23		7.0667	3605.85		7.0667	5846.69
7.2	13044.3		7.2	3740.8		7.2	5938.32		7.2	3606.67		7.2	5800.63
7.3333	12938.9		7.3333	3772.56		7.3333	5981.86		7.3333	3599.42		7.3333	5767.71
7.4667	12820.4		7.4667	3783.72		7.4667	6032.54		7.4667	3611.84		7.4667	5711.31
7.6	12736.6		7.6	3770.64		7.6	6032.28		7.6	3609.85		7.6	5682.45
7.7333	12547.6		7.7333	3780.08		7.7333	5960.22		7.7333	3625.1		7.7333	5691.53
7.8667	12582.8		7.8667	3798.67		7.8667	6041.66		7.8667	3618.5		7.8667	5736.17
8	12572.4		8	3807.64		8	5981.21		8	3622.3		8	5809.94
8.1333	12643.9		8.1333	3788.02		8.1333	5966.34		8.1333	3609.99		8.1333	5873.66
8.2667	12735.3		8.2667	3772.09		8.2667	5920.03		8.2667	3610.02		8.2667	5870.05
8.4	12729.9		8.4	3745.91		8.4	5887.1		8.4	3592.64		8.4	5917.4
8.5333	12835.6		8.5333	3746.26		8.5333	5823.16		8.5333	3600.33		8.5333	5954.45
8.6667	12864.7		8.6667	3748.35		8.6667	5757.68		8.6667	3607.97		8.6667	5964.47
8.8	12773.9		8.8	3765.35		8.8	5705.71		8.8	3597.52		8.8	5986.39
8.9333	12725.2		8.9333	3774.2		8.9333	5703.55		8.9333	3606.72		8.9333	6029.78
9.0667	12709.9		9.0667	3772.88		9.0667	5656.84		9.0667	3610.33		9.0667	6026.5
9.2	12727.7		9.2	3775.64		9.2	5620.8		9.2	3606.1		9.2	6065.4
9.3333	12656.8		9.3333	3772.97		9.3333	5608.48		9.3333	3608.47		9.3333	6044.15
9.4667	12817.6		9.4667	3773.5		9.4667	5608.08		9.4667	3625.59		9.4667	5974.86
9.6	12727.2		9.6	3776.55		9.6	5593.55		9.6	3629.56		9.6	5945.36
9.7333	12850.2		9.7333	3780.85		9.7333	5590.33		9.7333	3628.73		9.7333	5942.72
9.8667	12727.3		9.8667	3776.67		9.8667	5588.97		9.8667	3632.16		9.8667	6010.64
10	12852.6		10	3795.35		10	5539.34		10	3667.12		10	6157.07
10.1333	12905.9		10.1333	3777.41		10.1333	5493.15		10.1333	3725.3		10.1333	6350.24
10.2667	13070.5		10.2667	3805.66		10.2667	5445.22		10.2667	3818.03		10.2667	6358.19
10.4	13305.6		10.4	3785.7		10.4	5320.28		10.4	3941.12		10.4	6254.49
10.5333	13392.5		10.5333	3788.85		10.5333	5168.73		10.5333	4027.97		10.5333	6103.98
10.6667	13375.5		10.6667	3777.86		10.6667	5005.32		10.6667	4055.91		10.6667	6047.79
10.8	13439.2		10.8	3789.66		10.8	4809.41		10.8	4077.36		10.8	6025.03
10.9333	13664.8		10.9333	3778.88		10.9333	4601.8		10.9333	4083.28		10.9333	5955.63
11.0667	14045		11.0667	3752.67		11.0667	4442.48		11.0667	4106.09		11.0667	5877.26
11.2	14400.6		11.2	3782.07		11.2	4293.82		11.2	4091.44		11.2	5734.22
11.3333	14629.4		11.3333	3766.96		11.3333	4172.07		11.3333	4086.9		11.3333	5627.31
11.4667	14787.7		11.4667	3787.25		11.4667	4093.41		11.4667	4106.5		11.4667	5578.06
11.6	15018.4		11.6	3785.92		11.6	3976.07		11.6	4113.22		11.6	5602.77
11.7333	15074		11.7333	3804.99		11.7333	3950.39		11.7333	4137.62		11.7333	5632.2
11.8667	15167		11.8667	3775.77		11.8667	3892.56		11.8667	4162.13		11.8667	5649.97
12	15221.8		12	3776.62		12	3839.06		12	4211.22		12	5678.46
12.1333	15142.8		12.1333	3786.79		12.1333	3825.33		12.1333	4264.2		12.1333	5738.84
12.2667	15095.9		12.2667	3787.38		12.2667	3793.92		12.2667	4302.65		12.2667	5763.25
12.4	14984.2		12.4	3780.22		12.4	3796.91		12.4	4303.28		12.4	5758.04
12.5333	14808.1		12.5333	3796.44		12.5333	3781.69		12.5333	4304.56		12.5333	5845.5
12.6667	14703.9		12.6667	3807.72		12.6667	3736.91		12.6667	4306.09		12.6667	5844.49
12.8	14679.8		12.8	3807.32		12.8	3766.48		12.8	4307.48		12.8	5793.84
12.9333	14777.7		12.9333	3787.33		12.9333	3746.08		12.9333	4337.56		12.9333	5739.97
13.0667	14917.5		13.0667	3811.81		13.0667	3749.96		13.0667	4369.9		13.0667	5754.53
13.2	15040.3		13.2	3814		13.2	3734.5		13.2	4374.88		13.2	5797.89
13.3333	15183.4		13.3333	3828.18		13.3333	3752.22		13.3333	4386.57		13.3333	5866.9
13.4667	15243.4		13.4667	3838.66		13.4667	3742.73		13.4667	4400.49		13.4667	5887.14
13.6	15404.4		13.6	3870.02		13.6	3726.15		13.6	4376.79		13.6	5903.39
13.7333	15560.3		13.7333	3871.66		13.7333	3708.29		13.7333	4385.32		13.7333	5918.4
13.8667	15785		13.8667	3847.69		13.8667	3684.02		13.8667	4405.37		13.8667	5907.74
14	16022.1		14	3851.74		14	3646.33		14	4442.24		14	5730.99
14.1333	16179.9		14.1333	3852.61		14.1333	3652.32		14.1333	4476.6		14.1333	5521.45
14.2667	16269.2		14.2667	3878.28		14.2667	3624.61		14.2667	4512.94		14.2667	5430.45
14.4	16333.9		14.4	3887.12		14.4	3632.24		14.4	4513.99		14.4	5384.36
14.5333	16296		14.5333	3891.43		14.5333	3632.92		14.5333	4552.89		14.5333	5333.46
14.6667	16248.6		14.6667	3877.48		14.6667	3604.28		14.6667	4616.69		14.6667	5255.48
14.8	16098.6		14.8	3867.69		14.8	3611.76		14.8	4665.24		14.8	5187.04
14.9333	16219.5		14.9333	3895.41		14.9333	3605.42		14.9333	4729.44		14.9333	5153.21
15.0667	16154.1		15.0667	3909.28		15.0667	3589.68		15.0667	4765.71		15.0667	5152.08
15.2	16133.6		15.2	3909.75		15.2	3588.49		15.2	4727.23		15.2	5151.78
15.3333	16125.3		15.3333	3897.42		15.3333	3563.36		15.3333	4706.41		15.3333	5109.95
15.4667	16147.9		15.4667	3868.47		15.4667	3571.32		15.4667	4679.22		15.4667	5050.37
15.6	16296.9		15.6	3882.35		15.6	3574.82		15.6	4634.53		15.6	4956.5
15.7333	16350.4		15.7333	3865.97		15.7333	3565.02		15.7333	4638.21		15.7333	4949.2
15.8667	16392.3		15.8667	3872.69		15.8667	3583.99		15.8667	4649.69		15.8667	4923.96
16	16334.8		16	3876.09		16	3575.68		16	4733.45		16	4944.77
16.1333	16196.5		16.1333	3868.15		16.1333	3547.01		16.1333	4854.61		16.1333	4989.73
16.2667	15983.1		16.2667	3871.4		16.2667	3544.85		16.2667	4962.85		16.2667	4998.69
16.4	15952.7		16.4	3874.35		16.4	3547.95		16.4	5082.42		16.4	5010.41
16.5333	15871.6		16.5333	3880.67		16.5333	3517.55		16.5333	5167.39		16.5333	4985.2
16.6667	15799.5		16.6667	3891.58		16.6667	3492.62		16.6667	5241.82		16.6667	4939
16.8	15937.7		16.8	3875.98		16.8	3533.78		16.8	5276.31		16.8	4926.55
16.9333	16062.4		16.9333	3897.45		16.9333	3519.11		16.9333	5274.88		16.9333	4912.83
17.0667	16133.1		17.0667	3900.98		17.0667	3506.55		17.0667	5261.71		17.0667	4913.13
17.2	16309.1		17.2	3924.74		17.2	3514.28		17.2	5249.43		17.2	4884.16
17.3333	16341.3		17.3333	3929.11		17.3333	3509.54		17.3333	5211.08		17.3333	4876.11
17.4667	16362.6		17.4667	3940.31		17.4667	3508		17.4667	5193.87		17.4667	4874.96
17.6	16318.3		17.6	3974.26		17.6	3504.39		17.6	5189.17		17.6	4893.64
17.7333	16322.6		17.7333	3982.57		17.7333	3489.02		17.7333	5189.95		17.7333	4888.64
17.8667	16364.4		17.8667	4003.15		17.8667	3483.5		17.8667	5188.71		17.8667	4913.59
18	16287.6		18	4023.31		18	3497.64		18	5155.74		18	4950.16
18.1333	16239.6		18.1333	4013.14		18.1333	3518.8		18.1333	5112.28		18.1333	4987.38
18.2667	16181.7		18.2667	4032.38		18.2667	3532.77		18.2667	5072.01		18.2667	5028.61
18.4	16103.6		18.4	4008.88		18.4	3524.8		18.4	5040.34		18.4	5086.73
18.5333	16095.1		18.5333	4019.92		18.5333	3537.7		18.5333	5051.44		18.5333	5129.49
18.6667	16034.4		18.6667	4027.2		18.6667	3563.03		18.6667	5074.35		18.6667	5124.03
18.8	16046.4		18.8	4029.62		18.8	3604.14		18.8	5112.74		18.8	5117.15
18.9333	16053		18.9333	4024.55		18.9333	3641.36		18.9333	5139.61		18.9333	5098.45
19.0667	16149.6		19.0667	4060.96		19.0667	3668.45		19.0667	5123.53		19.0667	5123.11
19.2	16135.5		19.2	4052.98		19.2	3671.39		19.2	5127.1		19.2	5201.46
19.3333	16140.2		19.3333	4073.16		19.3333	3712.01		19.3333	5139.3		19.3333	5232
19.4667	16150.5		19.4667	4054.95		19.4667	3722.22		19.4667	5191.45		19.4667	5278.94
19.6	16253.3		19.6	4096.52		19.6	3805.68		19.6	5222.11		19.6	5300.9
19.7333	16265.9		19.7333	4113.34		19.7333	3862.21		19.7333	5247.61		19.7333	5315.99
19.8667	16217.5		19.8667	4097.92		19.8667	3928.64		19.8667	5222.01		19.8667	5291.76
20	16210.2		20	4117.81		20	4048.92		20	5229.1		20	5306.38
20.1333	16329.2		20.1333	4156.1		20.1333	4213.08		20.1333	5255.07		20.1333	5338.82
20.2667	16224.3		20.2667	4149.78		20.2667	4492.83		20.2667	5319.09		20.2667	5401.66
20.4	16138.9		20.4	4197.98		20.4	4871.1		20.4	5375.1		20.4	5483.15
20.5333	16106.1		20.5333	4219.58		20.5333	5489.07		20.5333	5474.05		20.5333	5580.11
20.6667	16041.2		20.6667	4204.1		20.6667	6241.06		20.6667	5645.25		20.6667	5569.16
20.8	15990.6		20.8	4237.62		20.8	7047.83		20.8	5819.71		20.8	5473.61
20.9333	15950.7		20.9333	4266.21		20.9333	7745.94		20.9333	5881.73		20.9333	5408.25
21.0667	16088.1		21.0667	4285.89		21.0667	8146.07		21.0667	5853.9		21.0667	5425.84
21.2	16208.2		21.2	4310.4		21.2	8367.42		21.2	5771.31		21.2	5437.45
21.3333	16374		21.3333	4311.52		21.3333	8255.5		21.3333	5705.42		21.3333	5416.41
21.4667	16591.7		21.4667	4335.12		21.4667	8093.58		21.4667	5688.27		21.4667	5346.17
21.6	16656.3		21.6	4362.58		21.6	7719.85		21.6	5726.31		21.6	5255.2
21.7333	16735.9		21.7333	4394.51		21.7333	7383.11		21.7333	5816.13		21.7333	5210.96
21.8667	16598.2		21.8667	4404.41		21.8667	7163.6		21.8667	5884.81		21.8667	5202.82
22	16620		22	4429.13		22	6940.64		22	5953.72		22	5237.23
22.1333	16697		22.1333	4416.65		22.1333	6910.32		22.1333	6002.23		22.1333	5266.13
22.2667	16646.3		22.2667	4469.57		22.2667	6932.64		22.2667	6043.05		22.2667	5308.21
22.4	16680.8		22.4	4488.54		22.4	7090.65		22.4	6054.51		22.4	5300.84
22.5333	16651.8		22.5333	4493.76		22.5333	7384.28		22.5333	6051.9		22.5333	5233.76
22.6667	16708.8		22.6667	4521.64		22.6667	7902.06		22.6667	6084.25		22.6667	5257.38
22.8	16558.1		22.8	4468.23		22.8	8475.27		22.8	6157.95		22.8	5322.88
22.9333	16426		22.9333	4504.37		22.9333	9256.03		22.9333	6235.05		22.9333	5386.79
23.0667	16248		23.0667	4494.91		23.0667	10093		23.0667	6397.97		23.0667	5467.65
23.2	16205		23.2	4470.18		23.2	11047.5		23.2	6514.76		23.2	5538.33
23.3333	16119.2		23.3333	4505.71		23.3333	12059.5		23.3333	6531.74		23.3333	5532.63
23.4667	16092.2		23.4667	4537.98		23.4667	12947.2		23.4667	6471.94		23.4667	5510.31
23.6	16328.7		23.6	4524.73		23.6	13731		23.6	6468.03		23.6	5466.52
23.7333	16411.7		23.7333	4526.59		23.7333	14392.5		23.7333	6498.51		23.7333	5403.17
23.8667	16734.6		23.8667	4555.72		23.8667	14753.3		23.8667	6580.6		23.8667	5390.08
24	16897.2		24	4635.28		24	14563.9		24	6725.1		24	5382.47
24.1333	17073.5		24.1333	4673.53		24.1333	14148.2		24.1333	6889.48		24.1333	5342.03
24.2667	17254.1		24.2667	4771.06		24.2667	13758.9		24.2667	7001.9		24.2667	5386.04
24.4	17307.3		24.4	4847.6		24.4	13779.7		24.4	7052.81		24.4	5441.79
24.5333	17411.4		24.5333	4954.09		24.5333	13876.5		24.5333	7057.65		24.5333	5528.14
24.6667	17581.5		24.6667	5024.84		24.6667	13838.4		24.6667	7048.31		24.6667	5607.45
24.8	17747.2		24.8	5120.02		24.8	13807.6		24.8	7041.91		24.8	5616.38
24.9333	18041.4		24.9333	5211.07		24.9333	13801.3		24.9333	7085.68		24.9333	5634.05
25.0667	18391.9		25.0667	5274.46		25.0667	13895.6		25.0667	7159.88		25.0667	5668.52
25.2	18862		25.2	5430.07		25.2	14071.2		25.2	7257.61		25.2	5751.2
25.3333	19366.7		25.3333	5615.22		25.3333	14187.1		25.3333	7411.05		25.3333	5822.08
25.4667	19748.2		25.4667	5817.37		25.4667	14303.9		25.4667	7522.2		25.4667	5893.96
25.6	19911.3		25.6	6086.54		25.6	14305.9		25.6	7641.74		25.6	5970.92
25.7333	20051.5		25.7333	6339.24		25.7333	14362.6		25.7333	7713.03		25.7333	6067.91
25.8667	20167.2		25.8667	6796.21		25.8667	14468.7		25.8667	7731.69		25.8667	6154.51
26	20566.9		26	7349.17		26	14515.6		26	7783.59		26	6157.15
26.1333	20960.2		26.1333	8088.98		26.1333	14516.7		26.1333	7852.98		26.1333	6158.7
26.2667	21339		26.2667	9057.39		26.2667	14610.7		26.2667	7983.8		26.2667	6160.66
26.4	21808.1		26.4	10406.2		26.4	14937.6		26.4	8216.01		26.4	6234.88
26.5333	22412.8		26.5333	12000.9		26.5333	15214.8		26.5333	8501.04		26.5333	6346.65
26.6667	23086.6		26.6667	13830.8		26.6667	15524.5		26.6667	8738.72		26.6667	6424.97
26.8	23649.2		26.8	15553.2		26.8	15785.4		26.8	9015.19		26.8	6476.09
26.9333	24025.6		26.9333	17190.2		26.9333	16097		26.9333	9331.9		26.9333	6483.33
27.0667	24535.5		27.0667	18928		27.0667	16328.8		27.0667	9800.61		27.0667	6498.48
27.2	25004.9		27.2	20518.8		27.2	16547		27.2	10339.7		27.2	6535.44
27.3333	25472.6		27.3333	21688.7		27.3333	16844		27.3333	11261.7		27.3333	6590
27.4667	25952.3		27.4667	22772.8		27.4667	17134.6		27.4667	12700.5		27.4667	6661.74
27.6	26392.5		27.6	23576.1		27.6	17656.3		27.6	14809.7		27.6	6790.44
27.7333	26858.4		27.7333	24101		27.7333	18112.7		27.7333	17556.6		27.7333	6953.15
27.8667	27006.5		27.8667	24697.4		27.8667	18474.4		27.8667	20921.7		27.8667	7086.48
28	27057.5		28	25257.1		28	19065.5		28	24233.3		28	7233.93
28.1333	27211.5		28.1333	25820.3		28.1333	19571.3		28.1333	26468.5		28.1333	7329.06
28.2667	27580.3		28.2667	26232.7		28.2667	20242.2		28.2667	26906.6		28.2667	7465.61
28.4	27976.5		28.4	26331		28.4	20964.6		28.4	26392.7		28.4	7616.5
28.5333	28266.9		28.5333	26218.3		28.5333	22095.3		28.5333	25603.5		28.5333	7702.24
28.6667	28379.6		28.6667	26134.2		28.6667	23113.6		28.6667	24714.6		28.6667	7770.79
28.8	28504.5		28.8	25998		28.8	23967.6		28.8	23912.2		28.8	7787.11
28.9333	28438.3		28.9333	25531.4		28.9333	24691.7		28.9333	23369.5		28.9333	7849.92
29.0667	28294.3		29.0667	24909		29.0667	25193.6		29.0667	23182.4		29.0667	7877.55
29.2	28023.8		29.2	24506.8		29.2	25489.6		29.2	23568.1		29.2	8001.01
29.3333	27365.6		29.3333	24334.5		29.3333	25817.2		29.3333	24506		29.3333	7990.6
29.4667	27124.3		29.4667	24533.8		29.4667	25932		29.4667	26525.3		29.4667	8043.58
29.6	27165.1		29.6	24219.1		29.6	26123.7		29.6	29883		29.6	8186.15
29.7333	26903.4		29.7333	23313.6		29.7333	26221.2		29.7333	34759.4		29.7333	8304.61
29.8667	26782.6		29.8667	22230.8		29.8667	26389.8		29.8667	40128.3		29.8667	8388.08
30	26738.1		30	21494.2		30	26229.1		30	44251.4		30	8406.75
30.1333	26789		30.1333	21147.1		30.1333	25820.4		30.1333	46442.7		30.1333	8398.6
30.2667	26795.5		30.2667	20766.9		30.2667	25614.4		30.2667	47423.6		30.2667	8465.51
30.4	26844.9		30.4	20514.1		30.4	25123.7		30.4	48159.9		30.4	8513.72
30.5333	27077		30.5333	20408		30.5333	24569.9		30.5333	49215.6		30.5333	8615.63
30.6667	27661.6		30.6667	20615.3		30.6667	24026.8		30.6667	51079.3		30.6667	8707.19
30.8	28435.3		30.8	20929.5		30.8	23190.9		30.8	53017.4		30.8	8906.32
30.9333	29466.8		30.9333	21509.2		30.9333	22389		30.9333	54694.6		30.9333	9062.25
31.0667	30414.2		31.0667	22306.3		31.0667	21313.1		31.0667	55866		31.0667	9185.25
31.2	31175.8		31.2	23521.3		31.2	20047.6		31.2	56188.5		31.2	9312.46
31.3333	31573		31.3333	25022.7		31.3333	18737.5		31.3333	56204.7		31.3333	9460.58
31.4667	31121.2		31.4667	26673.6		31.4667	17783.1		31.4667	55712.7		31.4667	9648
31.6	29564.6		31.6	28171.5		31.6	16814.5		31.6	55675.7		31.6	9934.69
31.7333	27149.9		31.7333	29480.6		31.7333	16006.7		31.7333	56411.5		31.7333	10274.2
31.8667	24971.8		31.8667	30624.4		31.8667	15278.5		31.8667	58289.4		31.8667	10530.2
32	23367.7		32	31620.1		32	14638.9		32	61383		32	10803
32.1333	22221.9		32.1333	33172		32.1333	14091.4		32.1333	63963.6		32.1333	11011.5
32.2667	21439.5		32.2667	34660.6		32.2667	13701.3		32.2667	65281		32.2667	11275.9
32.4	20968.4		32.4	35701.3		32.4	13281.2		32.4	66318.4		32.4	11650.2
32.5333	20626.7		32.5333	36181.7		32.5333	12845.9		32.5333	67994.3		32.5333	12024.1
32.6667	20148.9		32.6667	36290		32.6667	12534.2		32.6667	70195.1		32.6667	12469.8
32.8	19843.6		32.8	36379.4		32.8	12351.6		32.8	72742.4		32.8	12819
32.9333	19658.8		32.9333	36558.3		32.9333	12284.6		32.9333	75930.5		32.9333	13157
33.0667	19673.2		33.0667	36992		33.0667	12062.3		33.0667	79682.5		33.0667	13529.7
33.2	19751.7		33.2	36700		33.2	11852.8		33.2	83863		33.2	14082.3
33.3333	19985.8		33.3333	36284.6		33.3333	11713.7		33.3333	89277.4		33.3333	14682.5
33.4667	20136		33.4667	35097.7		33.4667	11696.5		33.4667	97039.8		33.4667	15382.1
33.6	20410.5		33.6	33651.7		33.6	11617.4		33.6	107704		33.6	16221.5
33.7333	20675.6		33.7333	32250.1		33.7333	11646.8		33.7333	119938		33.7333	17207.8
33.8667	20869.9		33.8667	30755.7		33.8667	11598.7		33.8667	123271		33.8667	18087
34	21127.5		34	29140.4		34	11578.9		34	120140		34	18753.1
34.1333	21042.3		34.1333	27840.3		34.1333	11450.3		34.1333	114968		34.1333	19296.2
34.2667	20766.5		34.2667	26617.6		34.2667	11325		34.2667	109079		34.2667	19727.1
34.4	20389.8		34.4	25512.7		34.4	11251.5		34.4	101546		34.4	20260.1
34.5333	20323.9		34.5333	24200.3		34.5333	11300.1		34.5333	90840		34.5333	20664.1
34.6667	20583.2		34.6667	22689.9		34.6667	11353.7		34.6667	81110.3		34.6667	20943.5
34.8	20759.1		34.8	21067.8		34.8	11335.8		34.8	73835		34.8	20708.6
34.9333	20593.2		34.9333	19308		34.9333	11271.4		34.9333	68758.9		34.9333	20529.9
35.0667	20268		35.0667	17670.6		35.0667	11147.6		35.0667	65329.5		35.0667	20676.3
35.2	19956.1		35.2	16209.4		35.2	11014.7		35.2	63155.5		35.2	21231.7
35.3333	19445		35.3333	15016		35.3333	10862.3		35.3333	61835.3		35.3333	21866.6
35.4667	18940.2		35.4667	14064.1		35.4667	10633.4		35.4667	61217.4		35.4667	22533.7
35.6	18414.9		35.6	13354.3		35.6	10482.2		35.6	60787.9		35.6	23125.6
35.7333	18094.4		35.7333	12821.5		35.7333	10368.5		35.7333	60552.9		35.7333	23720.6
35.8667	17909.1		35.8667	12258.3		35.8667	10244.7		35.8667	59726.8		35.8667	24562.5
36	17751.5		36	11797.8		36	10255.3		36	58033.7		36	25800.8
36.1333	17660.3		36.1333	11411.8		36.1333	10185.9		36.1333	55031		36.1333	26967.2
36.2667	17802.6		36.2667	11034.9		36.2667	10104.2		36.2667	51100.9		36.2667	28030.8
36.4	17788		36.4	10727.9		36.4	9949.75		36.4	46549.1		36.4	28885.1
36.5333	17926.3		36.5333	10548.3		36.5333	9711.35		36.5333	42042		36.5333	29624.7
36.6667	17999		36.6667	10357.9		36.6667	9516.79		36.6667	37948.9		36.6667	30361.5
36.8	17901.8		36.8	10377.6		36.8	9357.23		36.8	34426.1		36.8	31002.2
36.9333	17824.1		36.9333	10290		36.9333	9205.7		36.9333	31261.1		36.9333	31578.4
37.0667	17506.8		37.0667	10295.3		37.0667	9172.52		37.0667	28781.2		37.0667	32445.6
37.2	17130.6		37.2	10312.4		37.2	9193.79		37.2	26519.9		37.2	33748.5
37.3333	16570.2		37.3333	10281		37.3333	9338.39		37.3333	24652.5		37.3333	35036.4
37.4667	15894.6		37.4667	10186.6		37.4667	9437.92		37.4667	23043.6		37.4667	36122.8
37.6	15261.2		37.6	10011		37.6	9361.91		37.6	21662.9		37.6	37027.2
37.7333	14613.5		37.7333	9871.01		37.7333	9292.44		37.7333	20503.1		37.7333	37762.6
37.8667	14198.4		37.8667	9714.05		37.8667	9155.21		37.8667	19441.9		37.8667	38167.9
38	14025.4		38	9587.93		38	8902.13		38	18391.9		38	37678.6
38.1333	13920		38.1333	9421.52		38.1333	8674.4		38.1333	17621.8		38.1333	36634.6
38.2667	13912.5		38.2667	9309.62		38.2667	8553.31		38.2667	17256.6		38.2667	35543.1
38.4	13962.8		38.4	9159.58		38.4	8291.86		38.4	16968.3		38.4	34790.9
38.5333	13941.9		38.5333	9117.95		38.5333	8150.61		38.5333	16851.4		38.5333	34345.8
38.6667	14005.7		38.6667	9127.16		38.6667	7912.51		38.6667	16791.7		38.6667	34605.1
38.8	13875.9		38.8	9071.69		38.8	7775.83		38.8	16743.1		38.8	35328.5
38.9333	13624.7		38.9333	8987.53		38.9333	7701.65		38.9333	16669.1		38.9333	36157.7
39.0667	13454.2		39.0667	8869.87		39.0667	7644.56		39.0667	16593.8		39.0667	36589.6
39.2	13376.3		39.2	8738.45		39.2	7591.11		39.2	16628.7		39.2	36466
39.3333	13353.5		39.3333	8664.06		39.3333	7528.49		39.3333	16621.2		39.3333	36447.1
39.4667	13354.1		39.4667	8562.34		39.4667	7419.1		39.4667	16605.6		39.4667	37045
39.6	13422.6		39.6	8449.06		39.6	7443.77		39.6	16569.8		39.6	38279.6
39.7333	13444.1		39.7333	8386.7		39.7333	7345.31		39.7333	16430.8		39.7333	39612
39.8667	13561.4		39.8667	8241.77		39.8667	7289.05		39.8667	16373.8		39.8667	40978.5
40	13464.5		40	8176.12		40	7254.35		40	16318.6		40	41738.2
40.1333	13326.1		40.1333	8104.73		40.1333	7128.51		40.1333	16203.6		40.1333	42297.3
40.2667	13160.3		40.2667	8058.41		40.2667	7056.25		40.2667	16100.1		40.2667	43018.6
40.4	13091.4		40.4	8005.54		40.4	7083.3		40.4	16071.2		40.4	43860.7
40.5333	12940.1		40.5333	7976.51		40.5333	6980.55		40.5333	15968		40.5333	44825.1
40.6667	12842.7		40.6667	7926.42		40.6667	6907.82		40.6667	15889.3		40.6667	45663.2
40.8	12697.7		40.8	7873.13		40.8	6848.07		40.8	15759.9		40.8	46170.3
40.9333	12528.7		40.9333	7807.82		40.9333	6863.12		40.9333	15643.8		40.9333	46234.6
41.0667	12435.7		41.0667	7756.35		41.0667	6818.84		41.0667	15538.9		41.0667	45586
41.2	12392.4		41.2	7686.86		41.2	6752.58		41.2	15378.5		41.2	44658.7
41.3333	12362		41.3333	7687.52		41.3333	6695.98		41.3333	15221.3		41.3333	43646.2
41.4667	12304.2		41.4667	7639.04		41.4667	6619.69		41.4667	15187.5		41.4667	42553.5
41.6	12298.6		41.6	7582.39		41.6	6482.25		41.6	15063.1		41.6	41362.3
41.7333	12226.7		41.7333	7497.49		41.7333	6407.56		41.7333	14998.1		41.7333	40297.5
41.8667	12212.2		41.8667	7411.22		41.8667	6315.75		41.8667	14885.9		41.8667	39296.5
42	12128.5		42	7273.06		42	6250.35		42	14819.2		42	38170.5
42.1333	11991.9		42.1333	7269.13		42.1333	6221.6		42.1333	14828.2		42.1333	37098.9
42.2667	11797.1		42.2667	7285.11		42.2667	6146.52		42.2667	14746.3		42.2667	36260.1
42.4	11655.7		42.4	7239.74		42.4	6154.79		42.4	14702.6		42.4	35658.6
42.5333	11650.2		42.5333	7200.78		42.5333	6195.63		42.5333	14661.7		42.5333	35136.5
42.6667	11697.8		42.6667	7091.04		42.6667	6175.15		42.6667	14687.1		42.6667	34277
42.8	11602.7		42.8	6970.84		42.8	6180.33		42.8	14688.2		42.8	33539.4
42.9333	11641.6		42.9333	6901.58		42.9333	6184.68		42.9333	14758.2		42.9333	32583.2
43.0667	11660.9		43.0667	6859.75		43.0667	6191.69		43.0667	14836.2		43.0667	31238.1
43.2	11667.7		43.2	6764.02		43.2	6102.3		43.2	14855		43.2	29428.5
43.3333	11617.8		43.3333	6710.66		43.3333	6029.4		43.3333	15050		43.3333	27773.9
43.4667	11518.7		43.4667	6656.87		43.4667	5969.4		43.4667	15255.6		43.4667	26334
43.6	11453.7		43.6	6615.41		43.6	5932.63		43.6	15259.5		43.6	25040.8
43.7333	11399.6		43.7333	6552.69		43.7333	5866.22		43.7333	14979.6		43.7333	24046.5
43.8667	11385.7		43.8667	6526.5		43.8667	5804.48		43.8667	14557.4		43.8667	23349.9
44	11316.1		44	6505.41		44	5824.36		44	14406.8		44	22711.3
44.1333	11194.3		44.1333	6420.85		44.1333	5809.31		44.1333	14356.6		44.1333	21764.5
44.2667	11167.8		44.2667	6412.64		44.2667	5787.69		44.2667	14439.3		44.2667	20762.1
44.4	11020.9		44.4	6335.11		44.4	5794.19		44.4	14637.6		44.4	19770.2
44.5333	11020		44.5333	6275.74		44.5333	5780.69		44.5333	14791.9		44.5333	18750.8
44.6667	10950.5		44.6667	6267.12		44.6667	5796.75		44.6667	14956.4		44.6667	17827.5
44.8	11008.9		44.8	6204.62		44.8	5884.82		44.8	15227.3		44.8	17008.8
44.9333	10939.9		44.9333	6148.02		44.9333	5930.31		44.9333	15510.7		44.9333	16311.7
45.0667	10896.4		45.0667	6138.68		45.0667	5829.5		45.0667	15869.8		45.0667	15830.1
45.2	10842		45.2	6074.99		45.2	5783.23		45.2	16372.1		45.2	15454.5
45.3333	10785		45.3333	6103.1		45.3333	5751.11		45.3333	17061		45.3333	15389
45.4667	10666		45.4667	6062.66		45.4667	5682.83		45.4667	18174.6		45.4667	15608.9
45.6	10673.6		45.6	6098.12		45.6	5664.71		45.6	19890.6		45.6	15785.4
45.7333	10619.4		45.7333	6066.24		45.7333	5818.69		45.7333	22259		45.7333	15917.5
45.8667	10582.9		45.8667	6050.11		45.8667	5892.23		45.8667	24359.7		45.8667	15978.8
46	10474.6		46	6011.62		46	5998.57		46	26251.5		46	16048.8
46.1333	10486.5		46.1333	6040.66		46.1333	6074.43		46.1333	27683.7		46.1333	15951.5
46.2667	10313		46.2667	6071.32		46.2667	6108.29		46.2667	26602.3		46.2667	15778.6
46.4	10177.4		46.4	6031.45		46.4	6091.44		46.4	22571.8		46.4	15531.6
46.5333	10093.3		46.5333	6038.18		46.5333	6152.22		46.5333	17991.6		46.5333	15205.1
46.6667	10181.4		46.6667	5990.88		46.6667	6173.08		46.6667	14680.7		46.6667	14901.4
46.8	10192.3		46.8	5985.29		46.8	6258.67		46.8	12660.5		46.8	14743.3
46.9333	10086.2		46.9333	5932.18		46.9333	6297.64		46.9333	11608.7		46.9333	14576.5
47.0667	10054.7		47.0667	5920.72		47.0667	6394.8		47.0667	10985.2		47.0667	14403.3
47.2	9937.78		47.2	5965.08		47.2	6433.15		47.2	10558.4		47.2	14167.3
47.3333	9890.41		47.3333	5912.07		47.3333	6418.35		47.3333	10218.3		47.3333	13927.3
47.4667	9829.69		47.4667	5917.65		47.4667	6403.93		47.4667	9997.28		47.4667	13602.1
47.6	9958.28		47.6	5915.47		47.6	6437.76		47.6	9852.28		47.6	13365.4
47.7333	9955.46		47.7333	5964.34		47.7333	6451.67		47.7333	9793.37		47.7333	13120.6
47.8667	9857.9		47.8667	5966.12		47.8667	6444.16		47.8667	9676.15		47.8667	12873.2
48	9845.18		48	6013.01		48	6485.48		48	9523.32		48	12499.2
48.1333	9796.78		48.1333	6023.27		48.1333	6537.84		48.1333	9411.73		48.1333	12251
48.2667	9782.59		48.2667	5997.88		48.2667	6528.15		48.2667	9288.13		48.2667	12182.8
48.4	9799.95		48.4	6014.59		48.4	6456.81		48.4	9177.66		48.4	12162.3
48.5333	10032.8		48.5333	5996.36		48.5333	6484.08		48.5333	9055.16		48.5333	12105.2
48.6667	10220.1		48.6667	6019		48.6667	6496.11		48.6667	9026.31		48.6667	12099.9
48.8	10533.2		48.8	6038.53		48.8	6527.25		48.8	9008.09		48.8	12008.3
48.9333	10772.5		48.9333	6072.12		48.9333	6484.1		48.9333	9083.9		48.9333	11961.8
49.0667	10668.6		49.0667	6147.86		49.0667	6513.62		49.0667	9244.47		49.0667	11966.7
49.2	10487.9		49.2	6156.28		49.2	6402.89		49.2	9349.81		49.2	12022.5
49.3333	10266.6		49.3333	6193.58		49.3333	6251.02		49.3333	9358.04		49.3333	11997.2
49.4667	9982		49.4667	6191.39		49.4667	6119.98		49.4667	9359.09		49.4667	11908.7
49.6	9655.51		49.6	6241.36		49.6	5986.04		49.6	9195.8		49.6	11834.5
49.7333	9365.86		49.7333	6265.37		49.7333	5890.52		49.7333	8888.05		49.7333	11842.5
49.8667	9069.49		49.8667	6320.36		49.8667	5834.52		49.8667	8547.34		49.8667	12030.1
50	8821.31		50	6399.16		50	5818.77		50	8300.02		50	12343.5
50.1333	8621.37		50.1333	6467.76		50.1333	5874.2		50.1333	8136.13		50.1333	12680.9
50.2667	8507.06		50.2667	6568.94		50.2667	5834.85		50.2667	8023.42		50.2667	12885.6
50.4	8334.37		50.4	6769.67		50.4	5773.23		50.4	7948.85		50.4	12895.9
50.5333	8236.51		50.5333	7123.53		50.5333	5647.02		50.5333	7842.1		50.5333	12775.5
50.6667	8120.49		50.6667	7762.58		50.6667	5564.67		50.6667	7755.26		50.6667	12623.6
50.8	8017.57		50.8	8712.98		50.8	5414.23		50.8	7701.89		50.8	12366.8
50.9333	7957.37		50.9333	9931.44		50.9333	5341.33		50.9333	7716.83		50.9333	12117.4
51.0667	7849.68		51.0667	11103.3		51.0667	5210.12		51.0667	7693.42		51.0667	11671.3
51.2	7816.6		51.2	12140.9		51.2	5235.31		51.2	7734.21		51.2	11073.3
51.3333	7810.99		51.3333	12926.3		51.3333	5246.11		51.3333	7714.31		51.3333	10470.4
51.4667	7654.49		51.4667	13424.1		51.4667	5292.56		51.4667	7727.81		51.4667	9915.35
51.6	7623.1		51.6	13816.1		51.6	5259.88		51.6	7718.07		51.6	9361.8
51.7333	7610.57		51.7333	14242.8		51.7333	5225.3		51.7333	7666.75		51.7333	8894.35
51.8667	7638.01		51.8667	14505.1		51.8667	5173.03		51.8667	7651.4		51.8667	8495.67
52	7571.68		52	14760.1		52	5125.18		52	7575.41		52	8192.39
52.1333	7445.71		52.1333	14947.3		52.1333	5075.85		52.1333	7507.58		52.1333	8050.24
52.2667	7311.97		52.2667	15262.4		52.2667	5095.09		52.2667	7507.04		52.2667	8012.79
52.4	7239.2		52.4	15447.6		52.4	5050.2		52.4	7489.54		52.4	7910.61
52.5333	7131.36		52.5333	15786.3		52.5333	5070.44		52.5333	7445.42		52.5333	7801.49
52.6667	7017.18		52.6667	15960		52.6667	5113.9		52.6667	7433.92		52.6667	7664.25
52.8	6961.41		52.8	16216.2		52.8	5118.5		52.8	7420.7		52.8	7507.25
52.9333	6919.78		52.9333	16490.9		52.9333	5178.13		52.9333	7440.97		52.9333	7212.88
53.0667	6913.07		53.0667	16847.3		53.0667	5195.99		53.0667	7436.35		53.0667	6891.74
53.2	6895.21		53.2	17205.3		53.2	5268.58		53.2	7409.58		53.2	6614.97
53.3333	6765.96		53.3333	17918.9		53.3333	5274.34		53.3333	7354.01		53.3333	6391.99
53.4667	6660.92		53.4667	18881.5		53.4667	5348.65		53.4667	7360.71		53.4667	6225.65
53.6	6562.21		53.6	20197.2		53.6	5408.19		53.6	7329.65		53.6	6139.47
53.7333	6525.79		53.7333	22109.6		53.7333	5461.29		53.7333	7390.95		53.7333	6092.85
53.8667	6482.34		53.8667	24231.9		53.8667	5593.84		53.8667	7395.68		53.8667	6083.93
54	6403.18		54	25773.4		54	5676.18		54	7395.38		54	5995.92
54.1333	6381.94		54.1333	24938.1		54.1333	5764.38		54.1333	7353.9		54.1333	5918.94
54.2667	6318.17		54.2667	22062.8		54.2667	5917.45		54.2667	7275.43		54.2667	5951.58
54.4	6292.91		54.4	17964.2		54.4	6072.66		54.4	7190.88		54.4	5974.19
54.5333	6238.29		54.5333	14257.9		54.5333	6277.33		54.5333	7028.02		54.5333	5971.09
54.6667	6167.23		54.6667	11374.7		54.6667	6493.48		54.6667	6804.12		54.6667	5910.87
54.8	6122.26		54.8	9480.39		54.8	6753.22		54.8	6526.88		54.8	5773.21
54.9333	6143.27		54.9333	8187.48		54.9333	6944.14		54.9333	6212.43		54.9333	5700.39
55.0667	6070.94		55.0667	7267.33		55.0667	7189.77		55.0667	5913.51		55.0667	5650.95
55.2	6046.74		55.2	6630.41		55.2	7340.73		55.2	5623.68		55.2	5578.34
55.3333	5969.97		55.3333	6013.4		55.3333	7469.11		55.3333	5343.53		55.3333	5476.76
55.4667	5940.53		55.4667	5517.63		55.4667	7546.52		55.4667	5041.1		55.4667	5404.77
55.6	5908.78		55.6	5182.31		55.6	7435.03		55.6	4773.78		55.6	5334.76
55.7333	5882.63		55.7333	4970.31		55.7333	7326.33		55.7333	4586.98		55.7333	5349.83
55.8667	5838		55.8667	4776.15		55.8667	7224.82		55.8667	4414		55.8667	5398.17
56	5799.61		56	4550.68		56	7157.88		56	4266.3		56	5453.41
56.1333	5819.52		56.1333	4406.08		56.1333	7147.57		56.1333	4140.84		56.1333	5496.59
56.2667	5798.45		56.2667	4254.27		56.2667	7069.11		56.2667	4059.5		56.2667	5499.55
56.4	5802.3		56.4	4130.89		56.4	6993.97		56.4	4005.03		56.4	5464.52
56.5333	5837.75		56.5333	4058.95		56.5333	6866.22		56.5333	3985.94		56.5333	5434.57
56.6667	5788.6		56.6667	4010.49		56.6667	6746.68		56.6667	3966.63		56.6667	5416.49
56.8	5797.61		56.8	3980.77		56.8	6681.5		56.8	3947.5		56.8	5408.1
56.9333	5792.18		56.9333	3937.74		56.9333	6625.81		56.9333	3937.59		56.9333	5390.35
57.0667	5730.99		57.0667	3912.47		57.0667	6614.17		57.0667	3920.53		57.0667	5367.69
57.2	5699.12		57.2	3913.36		57.2	6649.84		57.2	3940.09		57.2	5401.29
57.3333	5711.24		57.3333	3903.03		57.3333	6643.79		57.3333	3959.94		57.3333	5424.83
57.4667	5779.33		57.4667	3894.3		57.4667	6695.6		57.4667	3938		57.4667	5411.17
57.6	5736.27		57.6	3894.2		57.6	6779.25		57.6	3934.42		57.6	5424.98
57.7333	5749.22		57.7333	3879.06		57.7333	6731		57.7333	3917.72		57.7333	5392.78
57.8667	5654.46		57.8667	3883.12		57.8667	6689.81		57.8667	3892.65		57.8667	5362.53
58	5541.05		58	3902.12		58	6647.41		58	3898.33		58	5273.87
58.1333	5437.54		58.1333	3907.89		58.1333	6557.89		58.1333	3880.05		58.1333	5217.85
58.2667	5387.9		58.2667	3923.41		58.2667	6447.51		58.2667	3862.68		58.2667	5196.94
58.4	5347.61		58.4	3898.51		58.4	6319.75		58.4	3845.81		58.4	5177.8
58.5333	5242.84		58.5333	3898.02		58.5333	6171.86		58.5333	3833.73		58.5333	5180.56
58.6667	5144.41		58.6667	3886.73		58.6667	5985.54		58.6667	3846.95		58.6667	5164.45
58.8	5093.75		58.8	3910.99		58.8	5793.22		58.8	3855.46		58.8	5159.36
58.9333	5043.35		58.9333	3892.87		58.9333	5681.6		58.9333	3875.22		58.9333	5146.71
59.0667	5015.26		59.0667	3865.11		59.0667	5600.61		59.0667	3877.1		59.0667	5149.37
59.2	4991.48		59.2	3864.84		59.2	5521.01		59.2	3868.52		59.2	5141.07
59.3333	4976.61		59.3333	3874.46		59.3333	5428.68		59.3333	3855.62		59.3333	5096.91
59.4667	4965.94		59.4667	3870.89		59.4667	5355.29		59.4667	3860.27		59.4667	5049.27
59.6	4947.37		59.6	3842.45		59.6	5344.59		59.6	3846.56		59.6	5044.98
59.7333	4906.53		59.7333	3821.94		59.7333	5244.72		59.7333	3851.26		59.7333	5029.11
59.8667	4900.58		59.8667	3818.73		59.8667	5235		59.8667	3869.22		59.8667	5003.82
60	4907.08		60	3818.25		60	5186.56		60	3855.84		60	5007.69
60.1333	4896.97		60.1333	3788.29		60.1333	5131.98		60.1333	3844.89		60.1333	5074.25
60.2667	4853		60.2667	3796.19		60.2667	5117.52		60.2667	3851.49		60.2667	5103.54
60.4	4835.2		60.4	3796.79		60.4	5083		60.4	3855.56		60.4	5103.35
60.5333	4833.34		60.5333	3791.22		60.5333	5065.9		60.5333	3883.36		60.5333	5061.76
60.6667	4814.85		60.6667	3794.35		60.6667	5140.37		60.6667	3894.73		60.6667	5057.72
60.8	4779.74		60.8	3773.89		60.8	5177.71		60.8	3902.87		60.8	5039.82
60.9333	4748.21		60.9333	3785.2		60.9333	5194.35		60.9333	3887.85		60.9333	4993.65
61.0667	4758.43		61.0667	3770.73		61.0667	5130.97		61.0667	3880.67		61.0667	4993.65
61.2	4782.26		61.2	3775.32		61.2	5046.45		61.2	3878.07		61.2	4981.52
61.3333	4807.23		61.3333	3776.42		61.3333	5011.28		61.3333	3846.83		61.3333	4941.8
61.4667	4801.83		61.4667	3771.86		61.4667	4992.22		61.4667	3837.98		61.4667	4878.48
61.6	4796.95		61.6	3749.34		61.6	4922.48		61.6	3846.67		61.6	4783.62
61.7333	4798.41		61.7333	3757.72		61.7333	4781.26		61.7333	3835.51		61.7333	4676.38
61.8667	4797.08		61.8667	3740.36		61.8667	4693.74		61.8667	3828.53		61.8667	4570.51
62	4800.34		62	3736.22		62	4691.86		62	3816.86		62	4501.25
62.1333	4819.38		62.1333	3735.22		62.1333	4644.94		62.1333	3828.82		62.1333	4464.28
62.2667	4828.83		62.2667	3754.78		62.2667	4590.44		62.2667	3819.95		62.2667	4407.54
62.4	4824.25		62.4	3753.16		62.4	4589.69		62.4	3830.07		62.4	4349.67
62.5333	4815.5		62.5333	3731.89		62.5333	4512.8		62.5333	3846.19		62.5333	4281.94
62.6667	4891.9		62.6667	3747.02		62.6667	4459.9		62.6667	3835.07		62.6667	4194.26
62.8	4921.64		62.8	3733.49		62.8	4439.97		62.8	3848.58		62.8	4113.54
62.9333	4962.25		62.9333	3730.32		62.9333	4415.44		62.9333	3861.56		62.9333	4047.98
63.0667	4950.76		63.0667	3727.83		63.0667	4305.42		63.0667	3888.04		63.0667	4009.4
63.2	4980.28		63.2	3724.61		63.2	4211.65		63.2	3887.52		63.2	4012.5
63.3333	4958.36		63.3333	3730.28		63.3333	4164.2		63.3333	3893.84		63.3333	4004.09
63.4667	4918.19		63.4667	3724.44		63.4667	4084.2		63.4667	3895.32		63.4667	3977.32
63.6	4876.32		63.6	3711.4		63.6	4015.43		63.6	3915.98		63.6	3950.99
63.7333	4852.9		63.7333	3724.98		63.7333	3934.18		63.7333	3911.7		63.7333	3926.17
63.8667	4829.76		63.8667	3712.56		63.8667	3861.78		63.8667	3907.44		63.8667	3900.22
64	4830.31		64	3703.94		64	3798.49		64	3916.95		64	3852.72
64.1333	4841.27		64.1333	3709.15		64.1333	3754.88		64.1333	3907.46		64.1333	3805.47
64.2667	4869.25		64.2667	3713.8		64.2667	3726.98		64.2667	3865.52		64.2667	3751.6
64.4	4871.14		64.4	3720.47		64.4	3699.16		64.4	3843.84		64.4	3712.07
64.5333	4870.37		64.5333	3714.5		64.5333	3662.05		64.5333	3842.71		64.5333	3686.04
64.6667	4887.62		64.6667	3722.14		64.6667	3594.56		64.6667	3842.31		64.6667	3673.21
64.8	4935.16		64.8	3720.53		64.8	3584.66		64.8	3829.6		64.8	3669.08
64.9333	5013.28		64.9333	3719.35		64.9333	3550.31		64.9333	3823.37		64.9333	3657.13
65.0667	5077.73		65.0667	3709.56		65.0667	3551.49		65.0667	3799.49		65.0667	3628.92
65.2	5080.41		65.2	3696.88		65.2	3547.82		65.2	3781.6		65.2	3602.48
65.3333	5034.52		65.3333	3709.27		65.3333	3549.64		65.3333	3796.14		65.3333	3585.95
65.4667	5001.33		65.4667	3703.93		65.4667	3543.09		65.4667	3794.6		65.4667	3564.11
65.6	4931.16		65.6	3727.99		65.6	3555.44		65.6	3790.16		65.6	3551.67
65.7333	4876.7		65.7333	3703.5		65.7333	3545.49		65.7333	3784.5		65.7333	3555.15
65.8667	4864.08		65.8667	3723.52		65.8667	3564.99		65.8667	3784.72		65.8667	3569.44
66	4854.51		66	3716.11		66	3556.12		66	3780.06		66	3592.09
66.1333	4854.13		66.1333	3716.1		66.1333	3555.15		66.1333	3784.97		66.1333	3605.93
66.2667	4886.13		66.2667	3715.23		66.2667	3540.96		66.2667	3808.12		66.2667	3623.26
66.4	4892.97		66.4	3716.45		66.4	3503.19		66.4	3809.18		66.4	3629.11
66.5333	4867.08		66.5333	3698.05		66.5333	3504.24		66.5333	3823.07		66.5333	3630.2
66.6667	4860.53		66.6667	3722.21		66.6667	3494.06		66.6667	3814.36		66.6667	3641.19
66.8	4827.64		66.8	3709.08		66.8	3514.6		66.8	3826.6		66.8	3608.03
66.9333	4838.92		66.9333	3718.04		66.9333	3535.1		66.9333	3849.13		66.9333	3582.4
67.0667	4832.08		67.0667	3730.5		67.0667	3578.28		67.0667	3837.71		67.0667	3550.86
67.2	4868.65		67.2	3716.3		67.2	3607.15		67.2	3847.08		67.2	3528.11
67.3333	4868.91		67.3333	3719.69		67.3333	3637.61		67.3333	3862.65		67.3333	3514.25
67.4667	4884.26		67.4667	3694.47		67.4667	3698.99		67.4667	3859.76		67.4667	3528.47
67.6	4923.9		67.6	3707.25		67.6	3806.27		67.6	3862.17		67.6	3541.24
67.7333	4937.99		67.7333	3707.32		67.7333	3869.19		67.7333	3862.6		67.7333	3562.28
67.8667	4999.12		67.8667	3708.92		67.8667	3880.38		67.8667	3845.03		67.8667	3556.95
68	4978.81		68	3699.37		68	3850.03		68	3829.03		68	3536.26
68.1333	4969.49		68.1333	3695.88		68.1333	3822.77		68.1333	3831.38		68.1333	3498.35
Sum	6.784e+06		Sum	4.30824e+06		Sum	3.97317e+06		Sum	7.23228e+06		Sum	5.74978e+06		Average	5.60949e+06
Normalized to WT Average	1.20938		Normalized to WT Average	0.768027		Normalized to WT Average	0.708294		Normalized to WT Average	1.28929		Normalized to WT Average	1.02501		Normalized to WT Average	1

## Sheet: V409I 090619
VI neuron1 z stack			VI neuron2 z stack			VI neuron3 z stack			VI neuron4 z stack			VI neuron5 z stack			VI neuron6 z stack
Distance_(microns)	Gray_Value		Distance_(microns)	Gray_Value		Distance_(microns)	Gray_Value		Distance_(microns)	Gray_Value		Distance_(microns)	Gray_Value		Distance_(microns)	Gray_Value
0	5161.31		0	16738.7		0	3829.28		0	4719.69		0	3404.22		0	4213.5
0.1333	5214.32		0.1333	15581.6		0.1333	3838.98		0.1333	4725.78		0.1333	3403.67		0.1333	4181.19
0.2667	5347.45		0.2667	14489		0.2667	3811.69		0.2667	4698.83		0.2667	3383.93		0.2667	4164.79
0.4	5575.99		0.4	13667.6		0.4	3812.13		0.4	4680.4		0.4	3391.43		0.4	4197.28
0.5333	5876.43		0.5333	13059.4		0.5333	3812.14		0.5333	4689.14		0.5333	3398.18		0.5333	4227.08
0.6667	6159.45		0.6667	12716.1		0.6667	3834.82		0.6667	4685.27		0.6667	3417.55		0.6667	4267.62
0.8	6290.4		0.8	12375.1		0.8	3808.1		0.8	4663.86		0.8	3388.43		0.8	4281.19
0.9333	6125.75		0.9333	12147.2		0.9333	3827.09		0.9333	4720.23		0.9333	3401.1		0.9333	4341.45
1.0667	5716.35		1.0667	11938		1.0667	3846.38		1.0667	4783.47		1.0667	3414.37		1.0667	4400.84
1.2	5309.59		1.2	11839.6		1.2	3867.1		1.2	4853.68		1.2	3424.71		1.2	4431.11
1.3333	4978.33		1.3333	11807.5		1.3333	3863.42		1.3333	4878.48		1.3333	3421.73		1.3333	4413.75
1.4667	4786.09		1.4667	11712.1		1.4667	3839.68		1.4667	4879.68		1.4667	3418.77		1.4667	4391.66
1.6	4671.35		1.6	11699.4		1.6	3831.9		1.6	4886.4		1.6	3437.84		1.6	4390.4
1.7333	4566.1		1.7333	11823.9		1.7333	3850.52		1.7333	4941.36		1.7333	3460.96		1.7333	4440.48
1.8667	4454.22		1.8667	11783.2		1.8667	3832.09		1.8667	4909.54		1.8667	3479.1		1.8667	4461.69
2	4350.29		2	11776.5		2	3797.78		2	4912.31		2	3493.3		2	4480.16
2.1333	4283.82		2.1333	11810.7		2.1333	3788.33		2.1333	4885.51		2.1333	3516.77		2.1333	4538.53
2.2667	4280.59		2.2667	11847.6		2.2667	3809.69		2.2667	4864.41		2.2667	3587.69		2.2667	4641.8
2.4	4257.94		2.4	11867		2.4	3804.63		2.4	4819.01		2.4	3640.17		2.4	4858.47
2.5333	4233.93		2.5333	11862.3		2.5333	3796.76		2.5333	4802.92		2.5333	3667.23		2.5333	5154.61
2.6667	4225.26		2.6667	11836		2.6667	3809.15		2.6667	4832.77		2.6667	3694.07		2.6667	5716.71
2.8	4200.72		2.8	11771.1		2.8	3812.61		2.8	4857.15		2.8	3714.27		2.8	6639.47
2.9333	4186.27		2.9333	11775.4		2.9333	3817.74		2.9333	4927.64		2.9333	3763.69		2.9333	8189.2
3.0667	4170.64		3.0667	11797.7		3.0667	3789.01		3.0667	4939.41		3.0667	3790.27		3.0667	10560.7
3.2	4149.37		3.2	11846.4		3.2	3786.73		3.2	4998.01		3.2	3833.99		3.2	13472.7
3.3333	4174.83		3.3333	11945.7		3.3333	3752.11		3.3333	5001.19		3.3333	3922.02		3.3333	16088.9
3.4667	4224.9		3.4667	12053.8		3.4667	3747.16		3.4667	5021.61		3.4667	4087.36		3.4667	17779.7
3.6	4234.97		3.6	12076.4		3.6	3718.33		3.6	5029.27		3.6	4282.57		3.6	18401.9
3.7333	4224.2		3.7333	12045.6		3.7333	3703.33		3.7333	5014.72		3.7333	4510.27		3.7333	18252.5
3.8667	4203.46		3.8667	11948.6		3.8667	3705.01		3.8667	5021.36		3.8667	4842.45		3.8667	17565.4
4	4136.56		4	11915.2		4	3724.66		4	5028.39		4	5252.67		4	16847.1
4.1333	4064.72		4.1333	11954.5		4.1333	3746.92		4.1333	5044		4.1333	5700.78		4.1333	16219.9
4.2667	4053.22		4.2667	11976.6		4.2667	3770.77		4.2667	5056.33		4.2667	6196.56		4.2667	15659.8
4.4	4068.62		4.4	11949.7		4.4	3785.03		4.4	5088.6		4.4	6700.98		4.4	15198.5
4.5333	4127.58		4.5333	12084		4.5333	3805.85		4.5333	5096.44		4.5333	7171.32		4.5333	14973.7
4.6667	4170.27		4.6667	12247.9		4.6667	3806.32		4.6667	5131.26		4.6667	7637.91		4.6667	14988.4
4.8	4204.24		4.8	12343.4		4.8	3810.12		4.8	5165.67		4.8	8037.53		4.8	15350.3
4.9333	4189.61		4.9333	12500.3		4.9333	3800.8		4.9333	5156.46		4.9333	8343.39		4.9333	15943.2
5.0667	4220.1		5.0667	12750.4		5.0667	3778.21		5.0667	5141.65		5.0667	8600.52		5.0667	16611.2
5.2	4280.48		5.2	12873.4		5.2	3789.79		5.2	5109.95		5.2	8798.74		5.2	17363.2
5.3333	4347.86		5.3333	12951.1		5.3333	3765.68		5.3333	5059.47		5.3333	8921.83		5.3333	18046.8
5.4667	4448.32		5.4667	12865.2		5.4667	3773.73		5.4667	5099.56		5.4667	8980.48		5.4667	18318.3
5.6	4579.41		5.6	12760.8		5.6	3751.55		5.6	5156.87		5.6	9053.6		5.6	18455.6
5.7333	4734.74		5.7333	12795.8		5.7333	3738.05		5.7333	5243.89		5.7333	9245.39		5.7333	18710.7
5.8667	4826.47		5.8667	12815.4		5.8667	3737.52		5.8667	5338.36		5.8667	9511.44		5.8667	19225.8
6	4786.81		6	12789.8		6	3743.68		6	5381.65		6	9759.13		6	19941.5
6.1333	4724.76		6.1333	12855.6		6.1333	3740.97		6.1333	5418.13		6.1333	9966.24		6.1333	20766.5
6.2667	4704		6.2667	12788.9		6.2667	3755.16		6.2667	5440.33		6.2667	10274.2		6.2667	21602.7
6.4	4674.67		6.4	12745.2		6.4	3751.25		6.4	5496.34		6.4	10622.9		6.4	22279.1
6.5333	4610.33		6.5333	12685.8		6.5333	3764.45		6.5333	5521.08		6.5333	10932.7		6.5333	22461.3
6.6667	4551.05		6.6667	12660.9		6.6667	3779.26		6.6667	5575.5		6.6667	11297.8		6.6667	22388.4
6.8	4513.26		6.8	12591.2		6.8	3815.29		6.8	5618.2		6.8	11773.3		6.8	22129.6
6.9333	4551.9		6.9333	12557.9		6.9333	3867.04		6.9333	5683.3		6.9333	12321		6.9333	21619.3
7.0667	4600.96		7.0667	12524		7.0667	3913.04		7.0667	5769.25		7.0667	12939.1		7.0667	21017.5
7.2	4591.25		7.2	12556.1		7.2	3984.08		7.2	5858.31		7.2	13467.5		7.2	20095.9
7.3333	4519.19		7.3333	12603.1		7.3333	4104.27		7.3333	5955.31		7.3333	13670.1		7.3333	19079.6
7.4667	4490.12		7.4667	12579		7.4667	4267.72		7.4667	6044.9		7.4667	13477.9		7.4667	17913.6
7.6	4529.38		7.6	12505.4		7.6	4450.14		7.6	6198.08		7.6	13285.9		7.6	16541.1
7.7333	4647.28		7.7333	12441.5		7.7333	4609.14		7.7333	6301.89		7.7333	12938.9		7.7333	15072.4
7.8667	4700.11		7.8667	12363.8		7.8667	4790.76		7.8667	6394.93		7.8667	12635.8		7.8667	13574.2
8	4779.94		8	12353.6		8	5002.38		8	6467.86		8	12379.1		8	11854.5
8.1333	4893.24		8.1333	12323.3		8.1333	5207.48		8.1333	6528.16		8.1333	12175.1		8.1333	10080.8
8.2667	4994.94		8.2667	12255.3		8.2667	5510.28		8.2667	6545.81		8.2667	12107.8		8.2667	8549.32
8.4	5007.67		8.4	12247.2		8.4	5898.42		8.4	6559.08		8.4	12160.6		8.4	7294.13
8.5333	4985.52		8.5333	12186.5		8.5333	6372.56		8.5333	6596.33		8.5333	12187.3		8.5333	6382
8.6667	4960.39		8.6667	12125.8		8.6667	6881.85		8.6667	6673.28		8.6667	12278.4		8.6667	5754.55
8.8	4995.47		8.8	12091.9		8.8	7370.43		8.8	6780.28		8.8	12412.5		8.8	5321.91
8.9333	5052.9		8.9333	12078.6		8.9333	7724.44		8.9333	6843.87		8.9333	12551.9		8.9333	5062.81
9.0667	5087.22		9.0667	12018.4		9.0667	7986.66		9.0667	6931.23		9.0667	12673.5		9.0667	4859.99
9.2	5109.98		9.2	11994.7		9.2	8196.61		9.2	7009.62		9.2	12711		9.2	4738.98
9.3333	5146.59		9.3333	11896.9		9.3333	8319.14		9.3333	7153.7		9.3333	12884		9.3333	4670.23
9.4667	5173.28		9.4667	11765.6		9.4667	8366.93		9.4667	7415.81		9.4667	12966.3		9.4667	4629.8
9.6	5242.54		9.6	11723.9		9.6	8315.98		9.6	7771.17		9.6	12987.8		9.6	4641.88
9.7333	5362.33		9.7333	11708.4		9.7333	8254.15		9.7333	8278.74		9.7333	13076.1		9.7333	4630.06
9.8667	5483.94		9.8667	11689.5		9.8667	8302.45		9.8667	8992.39		9.8667	13233.2		9.8667	4681.63
10	5483.26		10	11634.1		10	8309.01		10	9843.9		10	13409.5		10	4697.05
10.1333	5381.38		10.1333	11571.4		10.1333	8271.12		10.1333	10780.2		10.1333	13700.2		10.1333	4712.62
10.2667	5239.9		10.2667	11620.1		10.2667	8203.05		10.2667	11625.9		10.2667	13879		10.2667	4715.92
10.4	5115.6		10.4	11681.8		10.4	8134.32		10.4	12228.7		10.4	13972.9		10.4	4729.3
10.5333	5037.2		10.5333	11751.6		10.5333	8036.62		10.5333	12691.5		10.5333	13925.5		10.5333	4722.81
10.6667	5090.59		10.6667	11843.5		10.6667	7954.6		10.6667	13062.6		10.6667	13767.3		10.6667	4740.17
10.8	5165.97		10.8	11997.5		10.8	7807.16		10.8	13420.2		10.8	13535.5		10.8	4769.76
10.9333	5173.68		10.9333	12008.3		10.9333	7684.66		10.9333	13820.2		10.9333	13371.9		10.9333	4831.68
11.0667	5136.17		11.0667	11945.1		11.0667	7597.23		11.0667	14013.3		11.0667	13303		11.0667	4864.68
11.2	5093.86		11.2	11834.1		11.2	7498.92		11.2	14129.2		11.2	13273.5		11.2	4895.23
11.3333	5094.92		11.3333	11859.5		11.3333	7419.24		11.3333	14170.1		11.3333	13222.3		11.3333	4935.78
11.4667	5116.14		11.4667	11982		11.4667	7393.67		11.4667	14368.7		11.4667	13191		11.4667	4978.13
11.6	5127.31		11.6	12102		11.6	7364.9		11.6	14599.1		11.6	13078.3		11.6	5047.66
11.7333	5071.87		11.7333	12247		11.7333	7343.73		11.7333	14876.6		11.7333	12961.9		11.7333	5120.72
11.8667	4986.85		11.8667	12360.7		11.8667	7297.74		11.8667	15136.5		11.8667	12836.2		11.8667	5183.23
12	4871.87		12	12678.9		12	7322.26		12	15375.6		12	12799.7		12	5251.54
12.1333	4748.17		12.1333	13082.3		12.1333	7353.9		12.1333	15777		12.1333	12839.8		12.1333	5296.78
12.2667	4710.12		12.2667	13645.5		12.2667	7384.32		12.2667	16247.3		12.2667	13042.2		12.2667	5316.21
12.4	4678.12		12.4	14226.8		12.4	7362.9		12.4	16929.4		12.4	13263.1		12.4	5323.73
12.5333	4723.7		12.5333	14513.7		12.5333	7304.82		12.5333	17691.9		12.5333	13344.9		12.5333	5340.08
12.6667	4790.31		12.6667	14536.7		12.6667	7245.87		12.6667	18377.3		12.6667	13126.4		12.6667	5368.45
12.8	4911.5		12.8	14241.5		12.8	7165.84		12.8	19112.8		12.8	12906.5		12.8	5386.1
12.9333	4991.88		12.9333	13861.7		12.9333	7134.64		12.9333	19892.8		12.9333	12742.6		12.9333	5447.73
13.0667	5022.8		13.0667	13526		13.0667	7113.97		13.0667	20637		13.0667	12669.1		13.0667	5524.79
13.2	5079.62		13.2	13345.2		13.2	7115.69		13.2	21257.3		13.2	12673.2		13.2	5571.03
13.3333	5175.09		13.3333	13298.7		13.3333	7066.62		13.3333	21886.3		13.3333	12598.8		13.3333	5569.56
13.4667	5271.94		13.4667	13289.8		13.4667	7037.95		13.4667	22422.8		13.4667	12405.6		13.4667	5620.3
13.6	5322.82		13.6	13344.5		13.6	6990.03		13.6	22933.5		13.6	12165.9		13.6	5677.28
13.7333	5341.25		13.7333	13364.6		13.7333	6981.53		13.7333	23602.8		13.7333	11944.7		13.7333	5713.14
13.8667	5427.03		13.8667	13472.4		13.8667	6973.55		13.8667	24524.6		13.8667	11967.8		13.8667	5677.86
14	5530.22		14	13526.8		14	6948.63		14	25768.6		14	11946.1		14	5681.21
14.1333	5651.69		14.1333	13539.3		14.1333	6973.81		14.1333	27063.1		14.1333	11946.4		14.1333	5673.6
14.2667	5636.72		14.2667	13569.5		14.2667	6978.42		14.2667	27902.8		14.2667	11914		14.2667	5717.46
14.4	5557.54		14.4	13561.4		14.4	6967.13		14.4	27943.7		14.4	11926.4		14.4	5750.66
14.5333	5419.49		14.5333	13673.2		14.5333	6961.39		14.5333	27312.3		14.5333	11823.4		14.5333	5849.1
14.6667	5440.46		14.6667	13775.7		14.6667	6969.65		14.6667	26391.1		14.6667	11748.6		14.6667	5928.5
14.8	5509.69		14.8	13947.3		14.8	7008.35		14.8	25368		14.8	11641.6		14.8	6025
14.9333	5579.1		14.9333	14117.5		14.9333	7012.03		14.9333	24367.6		14.9333	11514		14.9333	6146.96
15.0667	5599.77		15.0667	14136.6		15.0667	7036.27		15.0667	23439.8		15.0667	11347		15.0667	6256.13
15.2	5667.16		15.2	14078.9		15.2	7074.52		15.2	22384.2		15.2	11110.6		15.2	6346.56
15.3333	5691.02		15.3333	14004.3		15.3333	7112.59		15.3333	21560		15.3333	10906		15.3333	6435.28
15.4667	5705.92		15.4667	13852.6		15.4667	7138.18		15.4667	20541.1		15.4667	10875.4		15.4667	6474.99
15.6	5733.9		15.6	13776.7		15.6	7181.25		15.6	19428.5		15.6	11043.6		15.6	6563.86
15.7333	5779.02		15.7333	13735.8		15.7333	7192.63		15.7333	18604.1		15.7333	11109.5		15.7333	6719.42
15.8667	5842.72		15.8667	13678.1		15.8667	7249.97		15.8667	17734.8		15.8667	11126.4		15.8667	6838.74
16	5836.86		16	13680.9		16	7298.46		16	17111.5		16	11154		16	7069.74
16.1333	5806.44		16.1333	13681.9		16.1333	7293.22		16.1333	16585.8		16.1333	11163.2		16.1333	7320.87
16.2667	5764.27		16.2667	13680.2		16.2667	7260.05		16.2667	16266.3		16.2667	11183.7		16.2667	7586.55
16.4	5720.66		16.4	13648.1		16.4	7250.04		16.4	16165.8		16.4	11121.8		16.4	7742.02
16.5333	5706.48		16.5333	13681.8		16.5333	7273.73		16.5333	16092.2		16.5333	11011.1		16.5333	7742.85
16.6667	5806.62		16.6667	13781.7		16.6667	7312.03		16.6667	16009		16.6667	10944.4		16.6667	7728.69
16.8	5929.17		16.8	13841.6		16.8	7381.2		16.8	15935.3		16.8	10978.6		16.8	7709.07
16.9333	6067.26		16.9333	13914.9		16.9333	7460.56		16.9333	15937.1		16.9333	10908.6		16.9333	7701.83
17.0667	6152.07		17.0667	13911.7		17.0667	7529.23		17.0667	15931.9		17.0667	10919.2		17.0667	7750.5
17.2	6199.6		17.2	13838.9		17.2	7575.41		17.2	15962.2		17.2	11009.4		17.2	7837.77
17.3333	6201.98		17.3333	13822		17.3333	7702.72		17.3333	15938.2		17.3333	11192.7		17.3333	7886.63
17.4667	6239.05		17.4667	13719.9		17.4667	7809.86		17.4667	15931.8		17.4667	11571.2		17.4667	7879.56
17.6	6278.38		17.6	13638		17.6	7879.49		17.6	15877.7		17.6	12161.9		17.6	7841.56
17.7333	6416.71		17.7333	13548.7		17.7333	7960.15		17.7333	15842.2		17.7333	12766.4		17.7333	7909.76
17.8667	6668.68		17.8667	13449.8		17.8667	8043.97		17.8667	15793.1		17.8667	12992.5		17.8667	7918.67
18	6976.37		18	13329.1		18	8071.81		18	15804.6		18	12891.1		18	7924.02
18.1333	7259.42		18.1333	13296.6		18.1333	8187.56		18.1333	15781.1		18.1333	12771.1		18.1333	7861.97
18.2667	7471.87		18.2667	13233.1		18.2667	8340.49		18.2667	15733.1		18.2667	12642.6		18.2667	7870.4
18.4	7593.95		18.4	13204		18.4	8451.55		18.4	15739.7		18.4	12513.1		18.4	7884.22
18.5333	7525.21		18.5333	13248.1		18.5333	8616.2		18.5333	15908.5		18.5333	12436.1		18.5333	7931.5
18.6667	7382.82		18.6667	13296		18.6667	8727.43		18.6667	16098.7		18.6667	12544.3		18.6667	7939.13
18.8	7265.84		18.8	13337.4		18.8	8805.53		18.8	16178.6		18.8	12796.5		18.8	7903.9
18.9333	7181.46		18.9333	13373.1		18.9333	8848.11		18.9333	16087.1		18.9333	12994.3		18.9333	7877.94
19.0667	7149.65		19.0667	13429.3		19.0667	8774.42		19.0667	16012.2		19.0667	13154.5		19.0667	7828.59
19.2	7161.21		19.2	13465.4		19.2	8718.33		19.2	16114.7		19.2	13411.1		19.2	7722.42
19.3333	7212.25		19.3333	13536.7		19.3333	8709.32		19.3333	16306.3		19.3333	13682		19.3333	7633.43
19.4667	7335.8		19.4667	13537.7		19.4667	8732.94		19.4667	16542		19.4667	13935.4		19.4667	7521.26
19.6	7498.23		19.6	13586.6		19.6	8774.69		19.6	16830.9		19.6	14074.6		19.6	7491.98
19.7333	7598.15		19.7333	13618.7		19.7333	8755.21		19.7333	17173.3		19.7333	14027.3		19.7333	7484.33
19.8667	7645.67		19.8667	13705.7		19.8667	8731.06		19.8667	17477.7		19.8667	13762.1		19.8667	7449.78
20	7711.66		20	13788.5		20	8730.31		20	17772.8		20	13611		20	7452.93
20.1333	7783.01		20.1333	13864.9		20.1333	8749.92		20.1333	18087.9		20.1333	13592.1		20.1333	7426.64
20.2667	7774.72		20.2667	13827.7		20.2667	8754.25		20.2667	18411.5		20.2667	13482.4		20.2667	7371.25
20.4	7829.17		20.4	13863.1		20.4	8778.93		20.4	18729.6		20.4	13381.8		20.4	7323.99
20.5333	7871.26		20.5333	13846.7		20.5333	8802.79		20.5333	19068.5		20.5333	13301.8		20.5333	7319.02
20.6667	7901.56		20.6667	13891.9		20.6667	8872.19		20.6667	19589.5		20.6667	13313.5		20.6667	7325.42
20.8	7789.45		20.8	13899		20.8	8979.08		20.8	20411.3		20.8	13348.6		20.8	7364.69
20.9333	7497.02		20.9333	13819.2		20.9333	9088.23		20.9333	21386.2		20.9333	13321.5		20.9333	7419.82
21.0667	7234.5		21.0667	13785.1		21.0667	9160.14		21.0667	22641.5		21.0667	13332.4		21.0667	7462.11
21.2	6998.17		21.2	13855.6		21.2	9224.09		21.2	24148.5		21.2	13312.4		21.2	7474.24
21.3333	6891.47		21.3333	13919.1		21.3333	9269.15		21.3333	25790.2		21.3333	13318.4		21.3333	7529.07
21.4667	6906.53		21.4667	14026.1		21.4667	9356.23		21.4667	27343.9		21.4667	13441		21.4667	7564.88
21.6	6965.78		21.6	14089.7		21.6	9497.21		21.6	28968.5		21.6	13605.9		21.6	7639.24
21.7333	7063.48		21.7333	14130.1		21.7333	9551.37		21.7333	30721.6		21.7333	13777.2		21.7333	7738.15
21.8667	7118.88		21.8667	14152		21.8667	9549.91		21.8667	32629.7		21.8667	13867.6		21.8667	7828.44
22	7167.71		22	14292.4		22	9708.66		22	34741.3		22	13806.6		22	7826.4
22.1333	7239.95		22.1333	14476.5		22.1333	9970.75		22.1333	36978.6		22.1333	13675.9		22.1333	7858.59
22.2667	7315.63		22.2667	14653.7		22.2667	10190.5		22.2667	39261.5		22.2667	13539.5		22.2667	7945.49
22.4	7399.02		22.4	14796.8		22.4	10380.7		22.4	41532		22.4	13428.2		22.4	7958.01
22.5333	7416.91		22.5333	14928.3		22.5333	10535.4		22.5333	43825		22.5333	13320.5		22.5333	7979.85
22.6667	7406.1		22.6667	15067.9		22.6667	10784.2		22.6667	45972.7		22.6667	13259		22.6667	8031.51
22.8	7386.88		22.8	15148.7		22.8	10987.6		22.8	47727.7		22.8	13147.7		22.8	8080.89
22.9333	7418.44		22.9333	15219.1		22.9333	11159.8		22.9333	49319.8		22.9333	13144.5		22.9333	8110.48
23.0667	7510.24		23.0667	15279.8		23.0667	11366.3		23.0667	50447.8		23.0667	13298.8		23.0667	8214.38
23.2	7665.42		23.2	15436.7		23.2	11525.5		23.2	51376.8		23.2	13516.7		23.2	8432.51
23.3333	7789.46		23.3333	15666.3		23.3333	11561		23.3333	52106.5		23.3333	13611.3		23.3333	8667.44
23.4667	7942.75		23.4667	15945.5		23.4667	11556.7		23.4667	52659.4		23.4667	13534.4		23.4667	8872.44
23.6	8137.01		23.6	16206.7		23.6	11544.7		23.6	52631.5		23.6	13386.8		23.6	9065.47
23.7333	8292.34		23.7333	16609.4		23.7333	11483.4		23.7333	52012.4		23.7333	13248.8		23.7333	9227.96
23.8667	8457.88		23.8667	17039.3		23.8667	11431.2		23.8667	50881.8		23.8667	13162.7		23.8667	9348.35
24	8598.41		24	17590.2		24	11422.1		24	49507.5		24	13066.1		24	9453.59
24.1333	8731.76		24.1333	18307.2		24.1333	11462.8		24.1333	48046.2		24.1333	13020.4		24.1333	9561.73
24.2667	8873.1		24.2667	19038		24.2667	11449.9		24.2667	46390		24.2667	12948		24.2667	9586.47
24.4	9029		24.4	20036.4		24.4	11477.7		24.4	44843.3		24.4	12960.8		24.4	9646.06
24.5333	9340.67		24.5333	21517		24.5333	11524.3		24.5333	43411.3		24.5333	12941.6		24.5333	9731.08
24.6667	9753.39		24.6667	23397.4		24.6667	11598.8		24.6667	41770.8		24.6667	12879.3		24.6667	9845.6
24.8	10343.3		24.8	25165.4		24.8	11577.2		24.8	40072.2		24.8	12920.4		24.8	9930.05
24.9333	10919.9		24.9333	26344.1		24.9333	11587.8		24.9333	38502.7		24.9333	13062		24.9333	9932.6
25.0667	11393.4		25.0667	27306.2		25.0667	11530.8		25.0667	36970.9		25.0667	13169.9		25.0667	9873.49
25.2	11833.6		25.2	28251.3		25.2	11463.9		25.2	35630.7		25.2	13434.2		25.2	9879.06
25.3333	12313.2		25.3333	29366.9		25.3333	11406.4		25.3333	34388.6		25.3333	13824.3		25.3333	9959.84
25.4667	12766.3		25.4667	30329.2		25.4667	11411.1		25.4667	33078.9		25.4667	14515.7		25.4667	10037.8
25.6	13196		25.6	31119.5		25.6	11415.5		25.6	32071.6		25.6	15552.7		25.6	10152.6
25.7333	13829.8		25.7333	31427		25.7333	11450.1		25.7333	31533.4		25.7333	16910.4		25.7333	10311.8
25.8667	14692.8		25.8667	31327.9		25.8667	11515.6		25.8667	30875.2		25.8667	18493		25.8667	10446.9
26	15639.2		26	30801.7		26	11586.4		26	30188.4		26	20168.9		26	10541
26.1333	16892.2		26.1333	30109.7		26.1333	11644.5		26.1333	29570.7		26.1333	22043.7		26.1333	10602.5
26.2667	18313.4		26.2667	29481		26.2667	11786.7		26.2667	29099.3		26.2667	23528		26.2667	10642.9
26.4	19640.4		26.4	29099.6		26.4	11866.1		26.4	28999.8		26.4	24197.9		26.4	10583.7
26.5333	20859.2		26.5333	28603		26.5333	11963.7		26.5333	28930.1		26.5333	24133		26.5333	10512.2
26.6667	21854.7		26.6667	27737.2		26.6667	12037.5		26.6667	28519.2		26.6667	24225.5		26.6667	10532.9
26.8	22416.2		26.8	26873		26.8	12061.9		26.8	27987		26.8	24734.8		26.8	10514
26.9333	22555.5		26.9333	26026.5		26.9333	12077.4		26.9333	27490.7		26.9333	25659.4		26.9333	10552.8
27.0667	22527.2		27.0667	25403.6		27.0667	12075.2		27.0667	27103.6		27.0667	26684.4		27.0667	10667.6
27.2	22415.5		27.2	24883.2		27.2	12119		27.2	26681.6		27.2	27422.5		27.2	10758.6
27.3333	22259.9		27.3333	24348.5		27.3333	12009.3		27.3333	26031.5		27.3333	27773.9		27.3333	10791.9
27.4667	22049		27.4667	23982.5		27.4667	11871.7		27.4667	25392		27.4667	27658.2		27.4667	10824.9
27.6	21882		27.6	23673.4		27.6	11850.6		27.6	24753.1		27.6	27131.3		27.6	10903.5
27.7333	21444.9		27.7333	23308.2		27.7333	11801.8		27.7333	24331.2		27.7333	26371.3		27.7333	10903.3
27.8667	21015.6		27.8667	23076.1		27.8667	11748		27.8667	23960		27.8667	25536.2		27.8667	11003.6
28	20393.7		28	22965.5		28	11753.9		28	23769.2		28	24975.9		28	11353.1
28.1333	19689.3		28.1333	22843.9		28.1333	11766.7		28.1333	23553.9		28.1333	24755.8		28.1333	11790.1
28.2667	19037.8		28.2667	22613.4		28.2667	11703.7		28.2667	23361.3		28.2667	24923.3		28.2667	12305.7
28.4	18492.1		28.4	22623.1		28.4	11679.7		28.4	23221.3		28.4	25054.4		28.4	12816.5
28.5333	18118.5		28.5333	22690.5		28.5333	11644		28.5333	23466.2		28.5333	25099		28.5333	13478.2
28.6667	17817.1		28.6667	22764.9		28.6667	11623.9		28.6667	23697.7		28.6667	24991.1		28.6667	14491.9
28.8	17442.3		28.8	22891.4		28.8	11629.8		28.8	23861.3		28.8	24828.6		28.8	16228.3
28.9333	17027.4		28.9333	22951.6		28.9333	11673.3		28.9333	24060.9		28.9333	24942.1		28.9333	18613.8
29.0667	16625.7		29.0667	23198.6		29.0667	11719.6		29.0667	24048.8		29.0667	25560.1		29.0667	20631.6
29.2	16329		29.2	23555		29.2	11701		29.2	24062.5		29.2	27112.7		29.2	21566.1
29.3333	16217.1		29.3333	24071.1		29.3333	11704.6		29.3333	23931.7		29.3333	29484		29.3333	21322.9
29.4667	16063.3		29.4667	24648.9		29.4667	11767.9		29.4667	23859.2		29.4667	31879.5		29.4667	21029.1
29.6	15902.5		29.6	25413.3		29.6	11784.3		29.6	23449.4		29.6	33984.7		29.6	20857.3
29.7333	15517.1		29.7333	26257.2		29.7333	11814.4		29.7333	22727.7		29.7333	35766.8		29.7333	20823.2
29.8667	14957		29.8667	26923.1		29.8667	11811.6		29.8667	21892.1		29.8667	37345.6		29.8667	20843.6
30	14360.5		30	27468.1		30	11855.7		30	21098.5		30	38373.2		30	20990.7
30.1333	13754.1		30.1333	28001.7		30.1333	11870.7		30.1333	20219.7		30.1333	38762.2		30.1333	21067.2
30.2667	13430.4		30.2667	28632.9		30.2667	11891.5		30.2667	19362.8		30.2667	38673		30.2667	21025.7
30.4	13299.3		30.4	29099.9		30.4	11955.9		30.4	18701.7		30.4	38687.4		30.4	20821
30.5333	13251.3		30.5333	29522.1		30.5333	12060.2		30.5333	18245.9		30.5333	39007.1		30.5333	20518.2
30.6667	13136.8		30.6667	30109.7		30.6667	12160.2		30.6667	18026.4		30.6667	39611.2		30.6667	20154.7
30.8	12840.2		30.8	30580.6		30.8	12232.2		30.8	18107.3		30.8	40350		30.8	19814.1
30.9333	12437.8		30.9333	30840.3		30.9333	12291.9		30.9333	18312.7		30.9333	41290.6		30.9333	19493.8
31.0667	12022		31.0667	31175.6		31.0667	12352.5		31.0667	18075.2		31.0667	42139.9		31.0667	19255.2
31.2	11590.8		31.2	31422.2		31.2	12443.3		31.2	17338.8		31.2	42803.5		31.2	19213.7
31.3333	11129.7		31.3333	31807		31.3333	12626.9		31.3333	16262		31.3333	43159.6		31.3333	19053.3
31.4667	10801.2		31.4667	32485		31.4667	12730.8		31.4667	15074		31.4667	43348.9		31.4667	18931.5
31.6	10545.1		31.6	33315.1		31.6	12854.9		31.6	13838.8		31.6	43883.1		31.6	18808.2
31.7333	10257.6		31.7333	34103.3		31.7333	12904.5		31.7333	12769.9		31.7333	44302.3		31.7333	18704.2
31.8667	10048.4		31.8667	34974.7		31.8667	12958.6		31.8667	11998.1		31.8667	44166.3		31.8667	18693.6
32	9957.17		32	35910.2		32	13046.5		32	11476.3		32	43697.9		32	18785.8
32.1333	9874.48		32.1333	36997.3		32.1333	13204.2		32.1333	11123.7		32.1333	43322.4		32.1333	18894.6
32.2667	9761.97		32.2667	38506.7		32.2667	13499		32.2667	10799.8		32.2667	42692.8		32.2667	19218.3
32.4	9609.62		32.4	40371.9		32.4	13857.3		32.4	10418.9		32.4	41828.9		32.4	19535.7
32.5333	9445.05		32.5333	41991.5		32.5333	14190.9		32.5333	10036.3		32.5333	41182.6		32.5333	19709.6
32.6667	9430.29		32.6667	42549.5		32.6667	14422.6		32.6667	9720.7		32.6667	40715.9		32.6667	19484.3
32.8	9473		32.8	42201		32.8	14636.3		32.8	9572.67		32.8	40204.8		32.8	19106
32.9333	9466.45		32.9333	41563.6		32.9333	14921.5		32.9333	9558.6		32.9333	39582.4		32.9333	18688.2
33.0667	9360.52		33.0667	40705.6		33.0667	15231.2		33.0667	9601.25		33.0667	39057.1		33.0667	18307.5
33.2	9163.92		33.2	39803.5		33.2	15568.7		33.2	9661.46		33.2	38307.2		33.2	17839.7
33.3333	9006.76		33.3333	39217.8		33.3333	16057.2		33.3333	9716.41		33.3333	37336.5		33.3333	17387.6
33.4667	8852.55		33.4667	38890.6		33.4667	16560.7		33.4667	9777.56		33.4667	36030.2		33.4667	16868.6
33.6	8728.98		33.6	38878.1		33.6	17183.7		33.6	9776.35		33.6	34866.8		33.6	16668.6
33.7333	8655.52		33.7333	39167.1		33.7333	17762		33.7333	9708.16		33.7333	33803.9		33.7333	16540.1
33.8667	8612.54		33.8667	38968.8		33.8667	18377.4		33.8667	9711.22		33.8667	32938.8		33.8667	16489.6
34	8556.87		34	38239.6		34	19092.5		34	9726.27		34	32360.6		34	16484
34.1333	8531.48		34.1333	37078.5		34.1333	20055.3		34.1333	9792.94		34.1333	31732.8		34.1333	16490.4
34.2667	8435.42		34.2667	35915.2		34.2667	21361.2		34.2667	9841.7		34.2667	30883.9		34.2667	16576
34.4	8359.76		34.4	34817		34.4	23126.9		34.4	9948.88		34.4	29867.5		34.4	16605
34.5333	8281.32		34.5333	33645.3		34.5333	25364.7		34.5333	10013.1		34.5333	28753.4		34.5333	16689.1
34.6667	8222.34		34.6667	32760.5		34.6667	28224.8		34.6667	10043.3		34.6667	27502.1		34.6667	16848.2
34.8	8191.43		34.8	32342.7		34.8	31416.3		34.8	10145.5		34.8	26343.5		34.8	17084.4
34.9333	8112		34.9333	31991.2		34.9333	34966.1		34.9333	10307.4		34.9333	25217.8		34.9333	17163.7
35.0667	8102.15		35.0667	31488.3		35.0667	38916.8		35.0667	10300		35.0667	24347.5		35.0667	16946.7
35.2	8147.8		35.2	30942.2		35.2	43098.7		35.2	10215.9		35.2	23570.6		35.2	16702.6
35.3333	8126.5		35.3333	30299.5		35.3333	47608.4		35.3333	10153.9		35.3333	22984.8		35.3333	16562.9
35.4667	7988.88		35.4667	29689.4		35.4667	51752.4		35.4667	10169.8		35.4667	22375.6		35.4667	16472
35.6	7813.84		35.6	29200.1		35.6	55716.1		35.6	10192.6		35.6	21948.2		35.6	16535.5
35.7333	7683.31		35.7333	28882.9		35.7333	58705.6		35.7333	10224.7		35.7333	21420.9		35.7333	16544.8
35.8667	7657.55		35.8667	28765.7		35.8667	60713.2		35.8667	10246.6		35.8667	20853.1		35.8667	16555.7
36	7763.06		36	28728.6		36	62415.2		36	10209.6		36	20230.7		36	16577.6
36.1333	7843.25		36.1333	28683.6		36.1333	64609.9		36.1333	10211.2		36.1333	19688.2		36.1333	16694.5
36.2667	7800.62		36.2667	28477.7		36.2667	67055.8		36.2667	10220.8		36.2667	19396.2		36.2667	16836.6
36.4	7708.03		36.4	28392.4		36.4	69626.7		36.4	10329.5		36.4	19274.3		36.4	16968.9
36.5333	7614.74		36.5333	28349.1		36.5333	72316.6		36.5333	10483		36.5333	19156.4		36.5333	17169.1
36.6667	7538.59		36.6667	28153.2		36.6667	74349.3		36.6667	10726.1		36.6667	19035.2		36.6667	17197.7
36.8	7501.58		36.8	27937.1		36.8	75928.8		36.8	10923		36.8	18744.2		36.8	17283.4
36.9333	7506		36.9333	27779.7		36.9333	76990.1		36.9333	11068.5		36.9333	18425.6		36.9333	17428.6
37.0667	7571.62		37.0667	27454.3		37.0667	78325.4		37.0667	11162.3		37.0667	17897.1		37.0667	17559.4
37.2	7679.36		37.2	26985.6		37.2	79460.5		37.2	11284.8		37.2	17367.7		37.2	17727.4
37.3333	7780.18		37.3333	26442.7		37.3333	79185.5		37.3333	11451.1		37.3333	16857.2		37.3333	18136.5
37.4667	7800.66		37.4667	25795.1		37.4667	77366.7		37.4667	11622		37.4667	16507.9		37.4667	18587.8
37.6	7801.77		37.6	25239.5		37.6	74352.1		37.6	11740		37.6	16119.8		37.6	19082
37.7333	7921.4		37.7333	24838.5		37.7333	71332.5		37.7333	11906.5		37.7333	15968.6		37.7333	19328.1
37.8667	8003.7		37.8667	24614.3		37.8667	68388.4		37.8667	12413.6		37.8667	15977.2		37.8667	19467.9
38	8056.12		38	24574.8		38	65510.1		38	13076.1		38	15954.5		38	19532.6
38.1333	8089.84		38.1333	24603.2		38.1333	62855.8		38.1333	13840.9		38.1333	15893.8		38.1333	19703
38.2667	8116.4		38.2667	24696.8		38.2667	60900		38.2667	14535.9		38.2667	15721.4		38.2667	19809.1
38.4	8114.96		38.4	24592.6		38.4	59874.5		38.4	15416.9		38.4	15566.5		38.4	20012
38.5333	8210.53		38.5333	24260.7		38.5333	60375.3		38.5333	16367.8		38.5333	15287.2		38.5333	20154.6
38.6667	8407.45		38.6667	23844.3		38.6667	62541.3		38.6667	17408.5		38.6667	15064.4		38.6667	20397.3
38.8	8556.03		38.8	23270.5		38.8	64834.7		38.8	18337.7		38.8	14844.9		38.8	20459.1
38.9333	8416.65		38.9333	22764.7		38.9333	65873.9		38.9333	18841.6		38.9333	14743.5		38.9333	20365.3
39.0667	8248.29		39.0667	22370.8		39.0667	63743.7		39.0667	18903		39.0667	14678.4		39.0667	20052.7
39.2	8140.73		39.2	22088.3		39.2	58203.6		39.2	18565.1		39.2	14656.9		39.2	19876.6
39.3333	8250.95		39.3333	21880.7		39.3333	51442.7		39.3333	17904.1		39.3333	14692.2		39.3333	19803.5
39.4667	8456.72		39.4667	21716.9		39.4667	45561.7		39.4667	17113.4		39.4667	14728.9		39.4667	19679.1
39.6	8605.08		39.6	21607.7		39.6	41252		39.6	16296.6		39.6	14644.1		39.6	19577.6
39.7333	8575.57		39.7333	21406.7		39.7333	38175.8		39.7333	15592.9		39.7333	14446.5		39.7333	19608.3
39.8667	8504.83		39.8667	21226.9		39.8667	35855.8		39.8667	15007.1		39.8667	14173.4		39.8667	19582.2
40	8398.79		40	21176.3		40	34446.7		40	14621.6		40	14128.3		40	19324
40.1333	8328.97		40.1333	20961.5		40.1333	33736.2		40.1333	14331.7		40.1333	14237.6		40.1333	18876
40.2667	8255.6		40.2667	20763.8		40.2667	33555.8		40.2667	14148.4		40.2667	14452.1		40.2667	18283.5
40.4	8164.88		40.4	20648.8		40.4	33623		40.4	14073.4		40.4	14621.2		40.4	17812.9
40.5333	8089.57		40.5333	20524.4		40.5333	33818.1		40.5333	13946.9		40.5333	14689		40.5333	17401.1
40.6667	7948.44		40.6667	20431.4		40.6667	34180.5		40.6667	13820.9		40.6667	14718.9		40.6667	17102.5
40.8	7832.52		40.8	20403.9		40.8	34486.6		40.8	13651.9		40.8	14672.4		40.8	16982.2
40.9333	7746.67		40.9333	20371		40.9333	34801.6		40.9333	13417.2		40.9333	14663.6		40.9333	17010.5
41.0667	7678.01		41.0667	20198.9		41.0667	35209.7		41.0667	13204.9		41.0667	14612.4		41.0667	17124.6
41.2	7668.38		41.2	20034.6		41.2	35708.1		41.2	13031.7		41.2	14689.1		41.2	17145.8
41.3333	7658.85		41.3333	19905.7		41.3333	36194.1		41.3333	12857.5		41.3333	14805.3		41.3333	17187.9
41.4667	7600.43		41.4667	19878.3		41.4667	36326.5		41.4667	12758.1		41.4667	14960.8		41.4667	17135
41.6	7568.08		41.6	19807.5		41.6	36064.6		41.6	12608.2		41.6	14920.3		41.6	16931.4
41.7333	7485.89		41.7333	19745.5		41.7333	35768.1		41.7333	12427.6		41.7333	14721.1		41.7333	16802.3
41.8667	7399.86		41.8667	19763.4		41.8667	35512.6		41.8667	12258.6		41.8667	14378.7		41.8667	16791.5
42	7393.86		42	19763.4		42	35044.5		42	12169		42	14013.1		42	16756.2
42.1333	7471.46		42.1333	19717.9		42.1333	34699		42.1333	12124.6		42.1333	13741.4		42.1333	16777.9
42.2667	7561.82		42.2667	19697.5		42.2667	34734.1		42.2667	12144.7		42.2667	13630.1		42.2667	16697.1
42.4	7632.97		42.4	19653.4		42.4	34974.8		42.4	12324.2		42.4	13674.3		42.4	16600.2
42.5333	7538.11		42.5333	19650.7		42.5333	35167.8		42.5333	12434.6		42.5333	13866.1		42.5333	16443.6
42.6667	7377.69		42.6667	19638.8		42.6667	35218.9		42.6667	12540		42.6667	13902.4		42.6667	16227
42.8	7158.63		42.8	19536.8		42.8	34671.3		42.8	12788.7		42.8	13929.2		42.8	16137.3
42.9333	7059.03		42.9333	19339.5		42.9333	33047		42.9333	13057.6		42.9333	13997.3		42.9333	16053.9
43.0667	6974.64		43.0667	19191.7		43.0667	30544.8		43.0667	13299.7		43.0667	14103.8		43.0667	15947.7
43.2	6940.44		43.2	18944.9		43.2	27746.8		43.2	13573.1		43.2	14200.6		43.2	15808.3
43.3333	6915.33		43.3333	18712.1		43.3333	24941.1		43.3333	13966.5		43.3333	14267.4		43.3333	15680.6
43.4667	6835.17		43.4667	18364.3		43.4667	21817		43.4667	14812.9		43.4667	14292.2		43.4667	15587.4
43.6	6781.96		43.6	17934.4		43.6	18488.8		43.6	16173.9		43.6	14374.5		43.6	15516.1
43.7333	6790.89		43.7333	17525.5		43.7333	15512.8		43.7333	17977		43.7333	14594.7		43.7333	15439.2
43.8667	6850.78		43.8667	17205.7		43.8667	13460		43.8667	20372.8		43.8667	14767.2		43.8667	15481.6
44	6874.16		44	16925.5		44	11915.9		44	23310.3		44	15016		44	15518.8
44.1333	6884.61		44.1333	16693.7		44.1333	10851.6		44.1333	26050.6		44.1333	15301.5		44.1333	15553.1
44.2667	6921.09		44.2667	16495.1		44.2667	10087.5		44.2667	28195.8		44.2667	15814.8		44.2667	15480.5
44.4	7023.93		44.4	16300.5		44.4	9466.48		44.4	29667.3		44.4	16354.7		44.4	15460
44.5333	7114.61		44.5333	16128.8		44.5333	8987.04		44.5333	30023.5		44.5333	16938.4		44.5333	15405
44.6667	7255.18		44.6667	15942.3		44.6667	8593.38		44.6667	28372.4		44.6667	17646		44.6667	15332.4
44.8	7280.57		44.8	15866.5		44.8	8341.01		44.8	24749.9		44.8	18377		44.8	15227.5
44.9333	7234.68		44.9333	15752.7		44.9333	8161.86		44.9333	20956.3		44.9333	18928.8		44.9333	15085.8
45.0667	7208.35		45.0667	15679.7		45.0667	8030.09		45.0667	18016.7		45.0667	19501.4		45.0667	14963.3
45.2	7133.98		45.2	15601.6		45.2	7986.79		45.2	16056.2		45.2	20323.3		45.2	14911.8
45.3333	7167.98		45.3333	15439		45.3333	7940.54		45.3333	14643.3		45.3333	21639		45.3333	14867.7
45.4667	7337.35		45.4667	15371.8		45.4667	7934.69		45.4667	13625.1		45.4667	22160.7		45.4667	14911.4
45.6	7608.85		45.6	15258		45.6	7895.81		45.6	12898.9		45.6	20917.6		45.6	14971.5
45.7333	7880		45.7333	15179.7		45.7333	7836.37		45.7333	12412.6		45.7333	18507.3		45.7333	15007.6
45.8667	8119.71		45.8667	15094.2		45.8667	7724.59		45.8667	12110.4		45.8667	15993.9		45.8667	15037.5
46	8170.73		46	15089.7		46	7607.09		46	11766.1		46	14044.3		46	15019
46.1333	8185.66		46.1333	15009.5		46.1333	7496.88		46.1333	11552.9		46.1333	12592.8		46.1333	14925.3
46.2667	8148.52		46.2667	15009.5		46.2667	7401.02		46.2667	11346.9		46.2667	11629.5		46.2667	14861.5
46.4	8091.19		46.4	14932.9		46.4	7406.06		46.4	11131.5		46.4	11069.2		46.4	14841.2
46.5333	8003.41		46.5333	14923.3		46.5333	7377.58		46.5333	10831.1		46.5333	10689		46.5333	14839.5
46.6667	7958.26		46.6667	14977.1		46.6667	7407.18		46.6667	10460.8		46.6667	10382.1		46.6667	14831.2
46.8	7891.5		46.8	14912.4		46.8	7488.02		46.8	9987.71		46.8	10182.3		46.8	14819.1
46.9333	7861.14		46.9333	14842.2		46.9333	7485.24		46.9333	9703.79		46.9333	10165.1		46.9333	14729.1
47.0667	7929.61		47.0667	14710.4		47.0667	7445.96		47.0667	9555.73		47.0667	10141.2		47.0667	14678.5
47.2	7916.7		47.2	14693.6		47.2	7382.71		47.2	9500.69		47.2	10082.4		47.2	14603
47.3333	7813.34		47.3333	14705.4		47.3333	7349.35		47.3333	9381.36		47.3333	9944.88		47.3333	14521.6
47.4667	7669.35		47.4667	14755.8		47.4667	7277.52		47.4667	9220.45		47.4667	9821.74		47.4667	14439.7
47.6	7543.26		47.6	14856		47.6	7271.84		47.6	9011.87		47.6	9767.88		47.6	14489.3
47.7333	7440.41		47.7333	15012.9		47.7333	7298.77		47.7333	8922		47.7333	9729.84		47.7333	14549.2
47.8667	7477.41		47.8667	15083.2		47.8667	7331.89		47.8667	8793.68		47.8667	9722.19		47.8667	14569.8
48	7525.88		48	15283.6		48	7248.02		48	8722.51		48	9672.1		48	14544.6
48.1333	7575.31		48.1333	15391.8		48.1333	7131.39		48.1333	8668.16		48.1333	9651.03		48.1333	14665.3
48.2667	7560.8		48.2667	15493.1		48.2667	6945.98		48.2667	8556.49		48.2667	9548.21		48.2667	14744.3
48.4	7595.24		48.4	15622.6		48.4	6795.83		48.4	8489.13		48.4	9471.82		48.4	14841.3
48.5333	7626.65		48.5333	15817.2		48.5333	6671.84		48.5333	8368.51		48.5333	9432.67		48.5333	14876.5
48.6667	7728.98		48.6667	16126.9		48.6667	6597.76		48.6667	8257.82		48.6667	9483.83		48.6667	14948.6
48.8	7804.88		48.8	16486.1		48.8	6490.89		48.8	8136.8		48.8	9462.08		48.8	15070.6
48.9333	7730.33		48.9333	17060.8		48.9333	6274.12		48.9333	8025.62		48.9333	9384.4		48.9333	15147.9
49.0667	7578.82		49.0667	17689.4		49.0667	6004.36		49.0667	7993.72		49.0667	9192.76		49.0667	15220.6
49.2	7325.09		49.2	18341.2		49.2	5779.9		49.2	7921.17		49.2	9094.46		49.2	15328.6
49.3333	6956.52		49.3333	18941.5		49.3333	5705.99		49.3333	7852.81		49.3333	9084.33		49.3333	15429.9
49.4667	6619.81		49.4667	19722.3		49.4667	5726.14		49.4667	7812.98		49.4667	9068.39		49.4667	15606.5
49.6	6353.55		49.6	20150.9		49.6	5762.52		49.6	7787.3		49.6	9026.01		49.6	15774.7
49.7333	6193.62		49.7333	19978.8		49.7333	5875.72		49.7333	7724.44		49.7333	8972.47		49.7333	15904.4
49.8667	6152.66		49.8667	19047.5		49.8667	6004.21		49.8667	7700.99		49.8667	8917.97		49.8667	16120.7
50	6212.43		50	17785.8		50	6022.96		50	7689.79		50	8857.24		50	16301.2
50.1333	6191.96		50.1333	16461.3		50.1333	5973.72		50.1333	7717.9		50.1333	8769.15		50.1333	16455.8
50.2667	6017.84		50.2667	14953.5		50.2667	5837.06		50.2667	7745.56		50.2667	8696.49		50.2667	16719.9
50.4	5819.56		50.4	13604.5		50.4	5687.54		50.4	7769.25		50.4	8542.33		50.4	16970.4
50.5333	5666.5		50.5333	12547.2		50.5333	5527.69		50.5333	7782.37		50.5333	8398.53		50.5333	17228
50.6667	5607.86		50.6667	11793.6		50.6667	5441.93		50.6667	7791.52		50.6667	8297.51		50.6667	17552.1
50.8	5563.33		50.8	11278.1		50.8	5419.03		50.8	7766.5		50.8	8145.2		50.8	17883
50.9333	5474.45		50.9333	10993.4		50.9333	5457.36		50.9333	7731.39		50.9333	8120.87		50.9333	18227.9
51.0667	5364.61		51.0667	10785.9		51.0667	5445.69		51.0667	7630.99		51.0667	8081.85		51.0667	18625.4
51.2	5293.25		51.2	10688.2		51.2	5411.88		51.2	7535.68		51.2	8037.31		51.2	19025.1
51.3333	5236.67		51.3333	10592		51.3333	5392.87		51.3333	7429.14		51.3333	7938.64		51.3333	19290.8
51.4667	5147.07		51.4667	10452.6		51.4667	5386.42		51.4667	7332.29		51.4667	7845.51		51.4667	19447.1
51.6	5063.31		51.6	10365.8		51.6	5346.92		51.6	7278.16		51.6	7832.36		51.6	19554.5
51.7333	5004.18		51.7333	10316		51.7333	5224.59		51.7333	7211.35		51.7333	7815.02		51.7333	19681.5
51.8667	4994.39		51.8667	9999		51.8667	4999.31		51.8667	7203.71		51.8667	7784.8		51.8667	19653.9
52	4962.25		52	9989.41		52	4692.38		52	7184.83		52	7646		52	19544.1
52.1333	4920.79		52.1333	9833.97		52.1333	4441.84		52.1333	7229.28		52.1333	7454.8		52.1333	19573.1
52.2667	4818.9		52.2667	9629.72		52.2667	4272.86		52.2667	7225.93		52.2667	7274.92		52.2667	19624.8
52.4	4748.18		52.4	9524.06		52.4	4175.62		52.4	7152.43		52.4	7112.51		52.4	19731.6
52.5333	4641.55		52.5333	9403.83		52.5333	4135.69		52.5333	7113.19		52.5333	6967.95		52.5333	19870.6
52.6667	4511.28		52.6667	9354.93		52.6667	4114.97		52.6667	7031.7		52.6667	6873.48		52.6667	20028.2
52.8	4420.55		52.8	9264.6		52.8	4116.18		52.8	6955.75		52.8	6838.86		52.8	20174.8
52.9333	4402.59		52.9333	9150.91		52.9333	4124.52		52.9333	6949.38		52.9333	6808.25		52.9333	20281.5
53.0667	4457.68		53.0667	9035.66		53.0667	4118.94		53.0667	6923.54		53.0667	6783.82		53.0667	20537
53.2	4536.75		53.2	8899.2		53.2	4109.53		53.2	6887.53		53.2	6757.94		53.2	20654.8
53.3333	4523.57		53.3333	8709.15		53.3333	4079.94		53.3333	6824.16		53.3333	6646.83		53.3333	20813.7
53.4667	4507.32		53.4667	8518.69		53.4667	4054.12		53.4667	6776.21		53.4667	6515.94		53.4667	20944.6
53.6	4480.44		53.6	8370.76		53.6	4067.64		53.6	6742.99		53.6	6484.75		53.6	21203.9
53.7333	4444.05		53.7333	8325.86		53.7333	4065.43		53.7333	6813.28		53.7333	6498.83		53.7333	21320.8
53.8667	4388.63		53.8667	8309.27		53.8667	4058.76		53.8667	6884.83		53.8667	6465.2		53.8667	21373.4
54	4351.35		54	8302.52		54	4050.9		54	6941.11		54	6463.54		54	21334.7
54.1333	4320.94		54.1333	8278.55		54.1333	4033.53		54.1333	6980.18		54.1333	6455.85		54.1333	21356.5
54.2667	4322.03		54.2667	8252.56		54.2667	3975.5		54.2667	6999.24		54.2667	6436.11		54.2667	21450.8
54.4	4310.32		54.4	8280.66		54.4	3935.44		54.4	6981.58		54.4	6348.96		54.4	21564.8
54.5333	4327.2		54.5333	8225.27		54.5333	3902.94		54.5333	6950.84		54.5333	6251.72		54.5333	21676.9
54.6667	4333.31		54.6667	8168.78		54.6667	3872.56		54.6667	6946.51		54.6667	6151.5		54.6667	21926.8
54.8	4283.32		54.8	8127.31		54.8	3853.32		54.8	6986.77		54.8	6016.52		54.8	22303
54.9333	4222.01		54.9333	8092.1		54.9333	3830.38		54.9333	7085.04		54.9333	5894.04		54.9333	22629.8
55.0667	4220.56		55.0667	8013.16		55.0667	3811.22		55.0667	7166.61		55.0667	5787.46		55.0667	22873.7
55.2	4301.78		55.2	7935.86		55.2	3787.28		55.2	7199.34		55.2	5665.26		55.2	23158.6
55.3333	4379.32		55.3333	7925.9		55.3333	3755.74		55.3333	7181.81		55.3333	5621.48		55.3333	23388
55.4667	4497.88		55.4667	7888.52		55.4667	3741.52		55.4667	7156.31		55.4667	5517.71		55.4667	23636.4
55.6	4636.1		55.6	7846.36		55.6	3736.58		55.6	7107.35		55.6	5450.9		55.6	23813.9
55.7333	4791.61		55.7333	7732.6		55.7333	3731.01		55.7333	7063.33		55.7333	5419.69		55.7333	24034.6
55.8667	4968.27		55.8667	7608.09		55.8667	3728.66		55.8667	7048.74		55.8667	5410.87		55.8667	24234.8
56	5093.37		56	7498.39		56	3737.66		56	7035.71		56	5391.56		56	24420.2
56.1333	5081.25		56.1333	7418.2		56.1333	3744.11		56.1333	7068.24		56.1333	5386.87		56.1333	24605.8
56.2667	4956.07		56.2667	7381.95		56.2667	3747.95		56.2667	7112.28		56.2667	5381.35		56.2667	24715.9
56.4	4834.13		56.4	7341.18		56.4	3752.97		56.4	7133.85		56.4	5381.46		56.4	24754.1
56.5333	4673.49		56.5333	7327.44		56.5333	3758.79		56.5333	7109.07		56.5333	5329.79		56.5333	24651
56.6667	4491.23		56.6667	7325.42		56.6667	3762.25		56.6667	7069.82		56.6667	5285.2		56.6667	24545.9
56.8	4357.88		56.8	7285.79		56.8	3773.7		56.8	7030.6		56.8	5239.81		56.8	24375.4
56.9333	4276.73		56.9333	7193.11		56.9333	3772.83		56.9333	7021.99		56.9333	5195.15		56.9333	24120.4
57.0667	4270.22		57.0667	7105.01		57.0667	3778.42		57.0667	7009.87		57.0667	5154.7		57.0667	23908.4
57.2	4242.25		57.2	7026.55		57.2	3786.28		57.2	6974.67		57.2	5111.6		57.2	23744.9
57.3333	4202.43		57.3333	6999.33		57.3333	3802.47		57.3333	6992.62		57.3333	5085.83		57.3333	23651.6
57.4667	4134.59		57.4667	6920.77		57.4667	3802.23		57.4667	7023.7		57.4667	5062.98		57.4667	23611
57.6	4058.39		57.6	6834.26		57.6	3806.92		57.6	7020.28		57.6	5076.66		57.6	23366.4
57.7333	4037.69		57.7333	6669.95		57.7333	3797.5		57.7333	7011.49		57.7333	5079.88		57.7333	23003.8
57.8667	4055.44		57.8667	6484.6		57.8667	3795.23		57.8667	6953.79		57.8667	5165.52		57.8667	22674
58	4089.21		58	6281.43		58	3811.3		58	6930.19		58	5237.87		58	22352.7
58.1333	4068.65		58.1333	6196.71		58.1333	3840.29		58.1333	6890.24		58.1333	5296.89		58.1333	22152.5
58.2667	4025.23		58.2667	6128.62		58.2667	3855.2		58.2667	6811.39		58.2667	5283.69		58.2667	21874.6
58.4	3989.7		58.4	6092.53		58.4	3857.89		58.4	6776.59		58.4	5185.22		58.4	21549.8
58.5333	4005.29		58.5333	6072.66		58.5333	3848.3		58.5333	6756.38		58.5333	5093.39		58.5333	21177.4
58.6667	3990.55		58.6667	6039.91		58.6667	3867.56		58.6667	6749.78		58.6667	5005.46		58.6667	20773
58.8	3961.97		58.8	6034		58.8	3926.11		58.8	6778.5		58.8	4904.35		58.8	20320.7
58.9333	3920.11		58.9333	5955.55		58.9333	4029.06		58.9333	6789.75		58.9333	4813.04		58.9333	19834.5
59.0667	3891.97		59.0667	5839.68		59.0667	4232.98		59.0667	6793.2		59.0667	4748.32		59.0667	19344.8
59.2	3921.55		59.2	5760.23		59.2	4458.78		59.2	6882.52		59.2	4712.09		59.2	19186.6
59.3333	3935.53		59.3333	5735.73		59.3333	4489.72		59.3333	6874.74		59.3333	4692.6		59.3333	19225.7
59.4667	3950.42		59.4667	5760.19		59.4667	4325.36		59.4667	6864.91		59.4667	4705.89		59.4667	19263.5
59.6	3898.18		59.6	5772.27		59.6	4111.01		59.6	6894.83		59.6	4713.76		59.6	19330.8
59.7333	3860.61		59.7333	5749.22		59.7333	3974.17		59.7333	6853.9		59.7333	4719.27		59.7333	19336.8
59.8667	3804.59		59.8667	5701.28		59.8667	3897.39		59.8667	6822.39		59.8667	4810.51		59.8667	19577.6
60	3757.43		60	5645.38		60	3862.45		60	6870.26		60	4863.8		60	20291.3
60.1333	3731.07		60.1333	5621.92		60.1333	3834.28		60.1333	6891.73		60.1333	4902.07		60.1333	21599.7
60.2667	3719.76		60.2667	5587.57		60.2667	3797.1		60.2667	6913.62		60.2667	4890.5		60.2667	22146.4
60.4	3724.82		60.4	5566.78		60.4	3774.18		60.4	6917.36		60.4	4852.67		60.4	21121.7
60.5333	3748.25		60.5333	5572.5		60.5333	3753.45		60.5333	6881.6		60.5333	4831.09		60.5333	19302.2
60.6667	3739.89		60.6667	5598.42		60.6667	3740.08		60.6667	6845.21		60.6667	4814.16		60.6667	17791.3
60.8	3769.77		60.8	5616.68		60.8	3727.31		60.8	6796.35		60.8	4820.59		60.8	16822
60.9333	3792.15		60.9333	5683.66		60.9333	3715.9		60.9333	6785.07		60.9333	4818.2		60.9333	16172.9
61.0667	3788.84		61.0667	5717.75		61.0667	3715.92		61.0667	6824.3		61.0667	4804.35		61.0667	15651.2
61.2	3777.99		61.2	5716.58		61.2	3725.03		61.2	6827.08		61.2	4792.53		61.2	15321
61.3333	3765.06		61.3333	5696.59		61.3333	3720.38		61.3333	6857.31		61.3333	4750.71		61.3333	15104.5
61.4667	3788.87		61.4667	5656.69		61.4667	3720.19		61.4667	6879.92		61.4667	4702.43		61.4667	14784.3
61.6	3795.65		61.6	5621.64		61.6	3725.01		61.6	6876.8		61.6	4592.89		61.6	14524.9
61.7333	3767.97		61.7333	5573.23		61.7333	3727.83		61.7333	6884.04		61.7333	4524.89		61.7333	14265.2
61.8667	3749.18		61.8667	5581.31		61.8667	3731.73		61.8667	6858.81		61.8667	4445.8		61.8667	14026.4
62	3738.36		62	5591.74		62	3756.42		62	6867.46		62	4405.03		62	13847.3
62.1333	3767.06		62.1333	5613.84		62.1333	3761.05		62.1333	6908.58		62.1333	4403.73		62.1333	13760.3
62.2667	3771.08		62.2667	5650.85		62.2667	3764.32		62.2667	6919.18		62.2667	4379.49		62.2667	13752.1
62.4	3762.57		62.4	5693.3		62.4	3734.52		62.4	6991.15		62.4	4343.37		62.4	13741.9
62.5333	3771.57		62.5333	5738.8		62.5333	3722.76		62.5333	7033.42		62.5333	4285.05		62.5333	13738.3
62.6667	3779.22		62.6667	5755.16		62.6667	3711.67		62.6667	7023.02		62.6667	4229.07		62.6667	13699.5
62.8	3818.05		62.8	5734.76		62.8	3710.93		62.8	7066.62		62.8	4210.98		62.8	13678.2
62.9333	3831.49		62.9333	5669.32		62.9333	3703.06		62.9333	7071.34		62.9333	4195.92		62.9333	13799.6
63.0667	3832.89		63.0667	5613.86		63.0667	3699.42		63.0667	7101.68		63.0667	4182.24		63.0667	14045.8
63.2	3805.15		63.2	5560.23		63.2	3697.17		63.2	7067.09		63.2	4147.58		63.2	14393.5
63.3333	3798.33		63.3333	5523.88		63.3333	3697.73		63.3333	7080.77		63.3333	4103.06		63.3333	14667.3
63.4667	3794.55		63.4667	5487.62		63.4667	3685.44		63.4667	7049.47		63.4667	4069.63		63.4667	14716.3
63.6	3779.25		63.6	5462.95		63.6	3682.21		63.6	7028.06		63.6	4033.88		63.6	14677.9
63.7333	3744.19		63.7333	5447.92		63.7333	3685.38		63.7333	7013.87		63.7333	4028.53		63.7333	14429.6
63.8667	3726.52		63.8667	5441.79		63.8667	3678.99		63.8667	7011.65		63.8667	3983.25		63.8667	13986.2
64	3756.25		64	5454.87		64	3687.3		64	6981.94		64	3932.71		64	13397.4
64.1333	3817.68		64.1333	5455.23		64.1333	3708.13		64.1333	6966.18		64.1333	3928.08		64.1333	12873.3
64.2667	3831.54		64.2667	5530.02		64.2667	3711.37		64.2667	6945.41		64.2667	3904.47		64.2667	12467.3
64.4	3810.41		64.4	5575.34		64.4	3721.23		64.4	6935.95		64.4	3909.42		64.4	12143.3
64.5333	3763.55		64.5333	5593.72		64.5333	3708.24		64.5333	6940.94		64.5333	3920.35		64.5333	11934.4
64.6667	3736.15		64.6667	5544.89		64.6667	3698.36		64.6667	6969.04		64.6667	3926.58		64.6667	11892.3
64.8	3720.37		64.8	5503.49		64.8	3693.61		64.8	6995.6		64.8	3898.76		64.8	11858.9
64.9333	3699.78		64.9333	5411.26		64.9333	3691.76		64.9333	7058.7		64.9333	3844.41		64.9333	11790.3
65.0667	3650.51		65.0667	5367.67		65.0667	3675.8		65.0667	7105.5		65.0667	3794.76		65.0667	11693.4
65.2	3622.63		65.2	5317.53		65.2	3681.89		65.2	7140.24		65.2	3780.52		65.2	11662.4
65.3333	3593.99		65.3333	5285.99		65.3333	3658.54		65.3333	7172.36		65.3333	3790.64		65.3333	11610
65.4667	3568.35		65.4667	5259.6		65.4667	3660.3		65.4667	7188.1		65.4667	3818.02		65.4667	11586.5
65.6	3547.2		65.6	5230.88		65.6	3651.83		65.6	7180.98		65.6	3830.58		65.6	11608.2
65.7333	3557.65		65.7333	5196.27		65.7333	3646.27		65.7333	7147.61		65.7333	3829.08		65.7333	11576.1
65.8667	3581.91		65.8667	5114.66		65.8667	3652.27		65.8667	7103.56		65.8667	3817.86		65.8667	11543.1
66	3625.51		66	5070.88		66	3640.8		66	7086.73		66	3821.77		66	11515.6
66.1333	3632.62		66.1333	5058.43		66.1333	3646.84		66.1333	7070.48		66.1333	3804.24		66.1333	11499.6
66.2667	3634.97		66.2667	5049.01		66.2667	3642.45		66.2667	7071.37		66.2667	3797.16		66.2667	11525.4
66.4	3649.81		66.4	5078.93		66.4	3637.09		66.4	7051.15		66.4	3734.95		66.4	11540.9
66.5333	3648.45		66.5333	5106.33		66.5333	3642.59		66.5333	7023.86		66.5333	3668.18		66.5333	11607.9
66.6667	3632.28		66.6667	5106.75		66.6667	3642.41		66.6667	7064.14		66.6667	3605.25		66.6667	11690.7
66.8	3609.23		66.8	5118.42		66.8	3638.21		66.8	7027.91		66.8	3580.26		66.8	11679.6
66.9333	3595.83		66.9333	5114.68		66.9333	3625.36		66.9333	7040.96		66.9333	3578.81		66.9333	11600
67.0667	3606.7		67.0667	5144.6		67.0667	3635.2		67.0667	7034.14		67.0667	3571.63		67.0667	11533.7
67.2	3618.27		67.2	5178.42		67.2	3639.24		67.2	7044.4		67.2	3567.95		67.2	11472.7
67.3333	3602.61		67.3333	5204.84		67.3333	3631.61		67.3333	7085.36		67.3333	3555.08		67.3333	11441.6
67.4667	3573.53		67.4667	5226.71		67.4667	3621.73		67.4667	7161.3		67.4667	3571.19		67.4667	11389.6
67.6	3550.91		67.6	5223.86		67.6	3632.87		67.6	7271.41		67.6	3581.59		67.6	11322.2
67.7333	3563.2		67.7333	5219.03		67.7333	3617.44		67.7333	7286.73		67.7333	3603.76		67.7333	11323.1
67.8667	3597.08		67.8667	5186.17		67.8667	3634.1		67.8667	7295.73		67.8667	3628.58		67.8667	11267.8
68	3596.08		68	5125.73		68	3643.76		68	7272.97		68	3650.61		68	11216.6
68.1333	3591.07		68.1333	5047.71		68.1333	3645		68.1333	7240.47		68.1333	3656.36		68.1333	11112.7
Sum	3.5734e+06		Sum	6398294		Sum	6.48079e+06		Sum	5.96136e+06		Sum	6.75452e+06		Sum	6.01697e+06		Average	5.86422e+06		WT Average	5.60949e+06
Normalized to WT Average	0.637027		Normalized to WT Average	1.14062		Normalized to WT Average	1.15533		Normalized to WT Average	1.06273		Normalized to WT Average	1.20412		Normalized to WT Average	1.07264		Normalized to WT Average	1.04541

## Sheet: V409A 090619
VA neuron1 z stack			VA neuron2 z stack			VA neuron3 z stack			VA neuron4 z stack			VA neuron5 z stack
Distance_(microns)	Gray_Value		Distance_(microns)	Gray_Value		Distance_(microns)	Gray_Value		Distance_(microns)	Gray_Value		Distance_(microns)	Gray_Value
0	7923.21		0	3514.26		0	6256.51		0	5790.76		0	7812.47
0.1333	7828.3		0.1333	3489.39		0.1333	6294.25		0.1333	5759.56		0.1333	7674.8
0.2667	7673		0.2667	3452.28		0.2667	6300.99		0.2667	5711.1		0.2667	7568.93
0.4	7577.73		0.4	3471.1		0.4	6271.84		0.4	5624.03		0.4	7480.43
0.5333	7489.19		0.5333	3485.39		0.5333	6264.32		0.5333	5523.08		0.5333	7489.09
0.6667	7442.74		0.6667	3491.42		0.6667	6255.61		0.6667	5544.04		0.6667	7488.25
0.8	7394.32		0.8	3465.68		0.8	6259.39		0.8	5515.73		0.8	7467.33
0.9333	7380.48		0.9333	3463.24		0.9333	6382.46		0.9333	5554.17		0.9333	7485.28
1.0667	7380.82		1.0667	3467.57		1.0667	6483.89		1.0667	5561.68		1.0667	7518.36
1.2	7381.68		1.2	3469.79		1.2	6532.3		1.2	5514.04		1.2	7610.94
1.3333	7362.31		1.3333	3473.53		1.3333	6525.51		1.3333	5378.57		1.3333	7641.37
1.4667	7280.48		1.4667	3465.16		1.4667	6513.78		1.4667	5227.1		1.4667	7538.87
1.6	7170.74		1.6	3478.6		1.6	6517.77		1.6	5135.04		1.6	7421.73
1.7333	7085.07		1.7333	3510.25		1.7333	6553.31		1.7333	5093.46		1.7333	7377.08
1.8667	7013.01		1.8667	3514.91		1.8667	6580.42		1.8667	5066.29		1.8667	7337.9
2	7045.74		2	3515.32		2	6585.12		2	5081.19		2	7358.74
2.1333	7140.25		2.1333	3514.7		2.1333	6592.48		2.1333	5139.09		2.1333	7378.64
2.2667	7163.86		2.2667	3547.12		2.2667	6632.32		2.2667	5185.84		2.2667	7328.39
2.4	7147.58		2.4	3539.88		2.4	6687.48		2.4	5146.64		2.4	7257.91
2.5333	7139.45		2.5333	3515.97		2.5333	6774.12		2.5333	5105.89		2.5333	7260.86
2.6667	7203.14		2.6667	3513.52		2.6667	6829.07		2.6667	5103.4		2.6667	7248.31
2.8	7236.39		2.8	3508.71		2.8	6794.24		2.8	5120.57		2.8	7220.51
2.9333	7241.62		2.9333	3543.73		2.9333	6743.04		2.9333	5159.85		2.9333	7199.71
3.0667	7215.64		3.0667	3536.91		3.0667	6713.67		3.0667	5207.28		3.0667	7184.67
3.2	7170.87		3.2	3514.6		3.2	6752.44		3.2	5255.54		3.2	7288.38
3.3333	7156.01		3.3333	3476.81		3.3333	6873.98		3.3333	5237.69		3.3333	7390.43
3.4667	7125.1		3.4667	3476.35		3.4667	7012.62		3.4667	5213.05		3.4667	7490.81
3.6	7037.66		3.6	3477.15		3.6	7113.59		3.6	5179.28		3.6	7416.2
3.7333	6882.83		3.7333	3446.49		3.7333	7124.81		3.7333	5185.9		3.7333	7352.44
3.8667	6761.06		3.8667	3427.9		3.8667	7089.91		3.8667	5202.07		3.8667	7329.23
4	6704.5		4	3434.29		4	7059.65		4	5228.94		4	7382.26
4.1333	6711.11		4.1333	3423.57		4.1333	7015.32		4.1333	5245.44		4.1333	7475.7
4.2667	6705.36		4.2667	3418.11		4.2667	6980.69		4.2667	5289.72		4.2667	7509.75
4.4	6682.62		4.4	3424.33		4.4	6988.03		4.4	5354.74		4.4	7547.48
4.5333	6646.54		4.5333	3442.91		4.5333	7013.95		4.5333	5349.56		4.5333	7554.06
4.6667	6552.77		4.6667	3430.35		4.6667	7013.74		4.6667	5331.15		4.6667	7560.74
4.8	6477.06		4.8	3428.96		4.8	6999.04		4.8	5266.4		4.8	7524
4.9333	6447.98		4.9333	3428.72		4.9333	6987.69		4.9333	5186.62		4.9333	7509
5.0667	6476.58		5.0667	3448.25		5.0667	7007.43		5.0667	5168.66		5.0667	7430.6
5.2	6489.09		5.2	3466.02		5.2	7070.58		5.2	5146.16		5.2	7295.6
5.3333	6491.7		5.3333	3479.12		5.3333	7098.96		5.3333	5146.79		5.3333	7179.4
5.4667	6510.88		5.4667	3501.81		5.4667	7121.29		5.4667	5157.26		5.4667	7086.7
5.6	6553.28		5.6	3519.65		5.6	7079.46		5.6	5191.9		5.6	7092.1
5.7333	6599.2		5.7333	3556.16		5.7333	6994.24		5.7333	5216.6		5.7333	7121.2
5.8667	6679.84		5.8667	3576.03		5.8667	6977.52		5.8667	5250.92		5.8667	7192.8
6	6704.69		6	3592.55		6	6922.26		6	5285.03		6	7222.67
6.1333	6735.45		6.1333	3617.18		6.1333	6973.55		6.1333	5385.47		6.1333	7264.39
6.2667	6763.78		6.2667	3673.69		6.2667	7094.11		6.2667	5462.6		6.2667	7296.98
6.4	6833.55		6.4	3731.15		6.4	7148.1		6.4	5531.52		6.4	7312.41
6.5333	6917.07		6.5333	3744.5		6.5333	7289.74		6.5333	5474.88		6.5333	7228.19
6.6667	6953.08		6.6667	3812.85		6.6667	7476.49		6.6667	5404.39		6.6667	7194.49
6.8	6937.11		6.8	3987.15		6.8	7728.1		6.8	5343.17		6.8	7213.02
6.9333	6935.3		6.9333	4393.47		6.9333	7800.21		6.9333	5296.76		6.9333	7216.44
7.0667	6945.15		7.0667	5142.87		7.0667	7750.02		7.0667	5337.08		7.0667	7218.98
7.2	6923.95		7.2	6404.73		7.2	7658.52		7.2	5389.74		7.2	7233.2
7.3333	6920.98		7.3333	7898		7.3333	7615.9		7.3333	5401.52		7.3333	7215.35
7.4667	6935.35		7.4667	9047.43		7.4667	7622.42		7.4667	5453.52		7.4667	7156.58
7.6	6889.4		7.6	9329.92		7.6	7626.56		7.6	5505.43		7.6	7099.6
7.7333	6837.69		7.7333	9030.98		7.7333	7615.22		7.7333	5514.04		7.7333	7026.88
7.8667	6860.6		7.8667	8572.74		7.8667	7632.43		7.8667	5508.31		7.8667	6969.44
8	6860.23		8	8068.91		8	7682.99		8	5423.34		8	6952.13
8.1333	6919.05		8.1333	7690.83		8.1333	7733.73		8.1333	5361.53		8.1333	7007.31
8.2667	6935.23		8.2667	7337.77		8.2667	7840.84		8.2667	5305.79		8.2667	7089.35
8.4	6965.09		8.4	7089.6		8.4	7912.45		8.4	5298.41		8.4	7164.51
8.5333	7026.03		8.5333	6928.41		8.5333	7916.1		8.5333	5294.88		8.5333	7147.11
8.6667	7059.82		8.6667	6783.18		8.6667	7922.1		8.6667	5363.38		8.6667	7097.65
8.8	7075.3		8.8	6727.73		8.8	7918.18		8.8	5427.81		8.8	7098.58
8.9333	7135.91		8.9333	6751.85		8.9333	7923.23		8.9333	5455.99		8.9333	7126.08
9.0667	7185.94		9.0667	6742.39		9.0667	7916.44		9.0667	5381.15		9.0667	7197.96
9.2	7239.37		9.2	6724.28		9.2	7856.58		9.2	5300.23		9.2	7181.21
9.3333	7302.5		9.3333	6630.91		9.3333	7840.52		9.3333	5218.23		9.3333	7220.2
9.4667	7434.55		9.4667	6407.72		9.4667	7814.97		9.4667	5186.85		9.4667	7297.96
9.6	7515.9		9.6	6143.32		9.6	7766.48		9.6	5158.9		9.6	7404.17
9.7333	7537.77		9.7333	5916.36		9.7333	7777.35		9.7333	5107.14		9.7333	7517.11
9.8667	7492.02		9.8667	5825.21		9.8667	7826.03		9.8667	5134.65		9.8667	7593.99
10	7372.23		10	5782.51		10	7909.79		10	5291.96		10	7687.37
10.1333	7326.03		10.1333	5796.44		10.1333	8025.21		10.1333	5413.5		10.1333	7719.63
10.2667	7276.61		10.2667	5776.45		10.2667	8206.24		10.2667	5371.67		10.2667	7770.79
10.4	7250.32		10.4	5843.45		10.4	8342.4		10.4	5258.93		10.4	7776.86
10.5333	7304.6		10.5333	5903.97		10.5333	8504.79		10.5333	5213.02		10.5333	7765.02
10.6667	7378.9		10.6667	5991.86		10.6667	8706.03		10.6667	5231.47		10.6667	7812.28
10.8	7537.72		10.8	6028.92		10.8	9094.26		10.8	5232.03		10.8	7844.3
10.9333	7689.01		10.9333	6042.35		10.9333	9707.09		10.9333	5211.7		10.9333	7868.18
11.0667	7792.2		11.0667	6064.51		11.0667	10405.5		11.0667	5176.83		11.0667	7912.9
11.2	7843.23		11.2	6116.33		11.2	10956.1		11.2	5164.94		11.2	7878.46
11.3333	7877.54		11.3333	6116.31		11.3333	11371.8		11.3333	5133.19		11.3333	7883.48
11.4667	7941.09		11.4667	6064.47		11.4667	11452.5		11.4667	5155.65		11.4667	7844.18
11.6	7905.19		11.6	6030.23		11.6	11539.6		11.6	5165.12		11.6	7806.81
11.7333	7848.89		11.7333	6051.36		11.7333	11629.1		11.7333	5219.64		11.7333	7727.03
11.8667	7784.15		11.8667	6051.26		11.8667	11796.7		11.8667	5259.73		11.8667	7652.94
12	7795		12	6147.81		12	11912.2		12	5279.06		12	7680.43
12.1333	7824.51		12.1333	6249.24		12.1333	12071.6		12.1333	5263.02		12.1333	7714.67
12.2667	7897.66		12.2667	6395.06		12.2667	12141.3		12.2667	5234.25		12.2667	7773.61
12.4	7933.97		12.4	6544.59		12.4	12117.6		12.4	5203.43		12.4	7861.35
12.5333	7875.25		12.5333	6708.43		12.5333	12005.9		12.5333	5165.42		12.5333	7932.85
12.6667	7773.04		12.6667	6856.03		12.6667	11919.8		12.6667	5133.49		12.6667	7951.01
12.8	7716.58		12.8	6879.41		12.8	11962.5		12.8	5081.01		12.8	7904.53
12.9333	7756.85		12.9333	6934.77		12.9333	12003.7		12.9333	5060.22		12.9333	7830.63
13.0667	7856.65		13.0667	7020.07		13.0667	11986.4		13.0667	5093.74		13.0667	7815.76
13.2	8013.8		13.2	7160.09		13.2	11839.4		13.2	5104.78		13.2	7847.31
13.3333	8195.37		13.3333	7239.69		13.3333	11733.7		13.3333	5142.69		13.3333	7868.25
13.4667	8375.67		13.4667	7248.19		13.4667	11683		13.4667	5139.35		13.4667	7910.62
13.6	8556.52		13.6	7275.62		13.6	11602		13.6	5097.07		13.6	7955.09
13.7333	8695.04		13.7333	7270.27		13.7333	11558.5		13.7333	5074.43		13.7333	7972.96
13.8667	8843.31		13.8667	7302.52		13.8667	11548.6		13.8667	5039.52		13.8667	7988.58
14	8970.03		14	7318.07		14	11591.2		14	5010.46		14	7995.61
14.1333	9147.65		14.1333	7372.56		14.1333	11579.9		14.1333	4976.77		14.1333	8022.46
14.2667	9316.85		14.2667	7455.78		14.2667	11587.1		14.2667	5031.72		14.2667	8094.6
14.4	9478.17		14.4	7538.28		14.4	11634.1		14.4	5107.07		14.4	8165.44
14.5333	9588.91		14.5333	7707.12		14.5333	11768.4		14.5333	5207.57		14.5333	8238.28
14.6667	9677.47		14.6667	7865.77		14.6667	11917.3		14.6667	5252.86		14.6667	8267.5
14.8	9781.14		14.8	7957		14.8	12014.7		14.8	5302.3		14.8	8254.62
14.9333	9784.56		14.9333	8068.48		14.9333	12073.9		14.9333	5364.75		14.9333	8200.6
15.0667	9736.61		15.0667	8126.12		15.0667	12236.5		15.0667	5512.13		15.0667	8206.46
15.2	9811.99		15.2	8088.92		15.2	12541.4		15.2	5826.86		15.2	8314.96
15.3333	9943.73		15.3333	8056.64		15.3333	12996.2		15.3333	6291.3		15.3333	8460.41
15.4667	10128.9		15.4667	8031.38		15.4667	13339.1		15.4667	6507.91		15.4667	8626.85
15.6	10293.5		15.6	8110.41		15.6	13672.3		15.6	6312.21		15.6	8774.1
15.7333	10388.7		15.7333	8252.72		15.7333	13872.2		15.7333	5938.11		15.7333	8841.61
15.8667	10456.2		15.8667	8412.97		15.8667	14021.4		15.8667	5678.95		15.8667	8911.77
16	10465.7		16	8562.27		16	14131.4		16	5589.43		16	8951.41
16.1333	10609.8		16.1333	8706.71		16.1333	14255.6		16.1333	5543.95		16.1333	8955.74
16.2667	10780		16.2667	8855.13		16.2667	14551.6		16.2667	5517.52		16.2667	9064.84
16.4	10898.1		16.4	8864.09		16.4	15166		16.4	5527.66		16.4	9273.1
16.5333	11032.3		16.5333	8765.45		16.5333	15575.8		16.5333	5501.46		16.5333	9577.97
16.6667	11150.9		16.6667	8671.83		16.6667	15435.5		16.6667	5435.01		16.6667	9751
16.8	11304.1		16.8	8711.07		16.8	14920.8		16.8	5398.43		16.8	9823.39
16.9333	11659.2		16.9333	8778.78		16.9333	14326.9		16.9333	5418.5		16.9333	9860.62
17.0667	12118.1		17.0667	8844.8		17.0667	13876.4		17.0667	5494.68		17.0667	9875.6
17.2	12513.2		17.2	8927.52		17.2	13576.2		17.2	5528.49		17.2	9958.69
17.3333	13048.9		17.3333	8987.12		17.3333	13555.5		17.3333	5508.85		17.3333	10298.7
17.4667	13391.7		17.4667	9170.81		17.4667	13443.8		17.4667	5494.07		17.4667	10602.8
17.6	13583.5		17.6	9383.45		17.6	13271.8		17.6	5469.52		17.6	10870.2
17.7333	13756		17.7333	9485.31		17.7333	13042.7		17.7333	5441.72		17.7333	11146.7
17.8667	13902.1		17.8667	9550.64		17.8667	12892.6		17.8667	5437.19		17.8667	11496
18	14057.8		18	9654.15		18	12814.1		18	5473.99		18	11940.7
18.1333	14236.2		18.1333	9710.29		18.1333	12853.7		18.1333	5534.08		18.1333	12444.7
18.2667	14522.5		18.2667	9806.6		18.2667	12937.2		18.2667	5655.22		18.2667	12921.5
18.4	14971.2		18.4	9890.65		18.4	13132.9		18.4	5737.85		18.4	13508.4
18.5333	15497.5		18.5333	9963.69		18.5333	13256.5		18.5333	5689.21		18.5333	14097.1
18.6667	16207.9		18.6667	10186.8		18.6667	13273.8		18.6667	5547.64		18.6667	14671.5
18.8	16944		18.8	10525.7		18.8	13201.2		18.8	5461.6		18.8	15093.9
18.9333	17856.6		18.9333	10987.6		18.9333	13197.5		18.9333	5424.19		18.9333	15296.1
19.0667	18943.4		19.0667	11494.4		19.0667	13369		19.0667	5424.38		19.0667	15403.4
19.2	19866.5		19.2	12211.9		19.2	13586.5		19.2	5434.32		19.2	15489.9
19.3333	20145.1		19.3333	13231.7		19.3333	13904.1		19.3333	5476.61		19.3333	15468.6
19.4667	20009.6		19.4667	14606.5		19.4667	14198.3		19.4667	5589.92		19.4667	15299.7
19.6	19654		19.6	16087.8		19.6	14558.7		19.6	5683.63		19.6	15056
19.7333	19345		19.7333	17387		19.7333	14932.1		19.7333	5740.03		19.7333	14776.1
19.8667	19019.4		19.8667	18384.8		19.8667	15298		19.8667	5752.69		19.8667	14435.9
20	18979.9		20	19257.6		20	15781.4		20	5797.03		20	14073.5
20.1333	18975.8		20.1333	20044.3		20.1333	16523.7		20.1333	5826.89		20.1333	13611.9
20.2667	18875.5		20.2667	20516		20.2667	17464.5		20.2667	5894.91		20.2667	13097.3
20.4	18965.8		20.4	20782.3		20.4	18468.5		20.4	5953.09		20.4	12461.1
20.5333	19228.2		20.5333	20843.1		20.5333	19688.1		20.5333	6008.19		20.5333	11872.8
20.6667	19512.5		20.6667	21085		20.6667	21293.4		20.6667	6075.36		20.6667	11340
20.8	19882.6		20.8	21498.3		20.8	23205		20.8	6101.64		20.8	10935.4
20.9333	20465.1		20.9333	22116		20.9333	25340.1		20.9333	6113.98		20.9333	10608.7
21.0667	21076.8		21.0667	22835		21.0667	27758.7		21.0667	6083.8		21.0667	10449.5
21.2	21672.1		21.2	23618		21.2	30062.8		21.2	6126.66		21.2	10729.2
21.3333	22116.4		21.3333	24590.4		21.3333	32340.6		21.3333	6275.37		21.3333	11528.1
21.4667	22352.6		21.4667	25702.3		21.4667	34635.1		21.4667	6552.93		21.4667	12697.2
21.6	22666.8		21.6	26617.3		21.6	37327.9		21.6	6902.9		21.6	13692.9
21.7333	23276.6		21.7333	27438		21.7333	40392.5		21.7333	7094.53		21.7333	14304.5
21.8667	24311.4		21.8667	28061.4		21.8667	43704.7		21.8667	7187.03		21.8667	14525.8
22	25900.2		22	28938.7		22	47499.7		22	7124.76		22	14575.7
22.1333	28217.2		22.1333	29810.4		22.1333	51540.1		22.1333	7015.25		22.1333	14615.7
22.2667	30873.9		22.2667	30765.8		22.2667	55493.2		22.2667	7002.23		22.2667	14535.1
22.4	33497.5		22.4	31209.9		22.4	59870.5		22.4	6987.9		22.4	14469.3
22.5333	35672.3		22.5333	31387.1		22.5333	64235		22.5333	6870.32		22.5333	14456.4
22.6667	37744.3		22.6667	31624.7		22.6667	69072.3		22.6667	6737.28		22.6667	14562.2
22.8	39572		22.8	32079.5		22.8	74198.7		22.8	6587.23		22.8	14795.5
22.9333	40900.4		22.9333	33032.8		22.9333	79773.2		22.9333	6471.51		22.9333	14923.9
23.0667	41489.5		23.0667	34091.3		23.0667	85576.5		23.0667	6432.48		23.0667	14956.1
23.2	41471.7		23.2	35279.8		23.2	91045.7		23.2	6471.19		23.2	14800.2
23.3333	41286.6		23.3333	36317.3		23.3333	96593.1		23.3333	6540.77		23.3333	14697.4
23.4667	40921.2		23.4667	37594.7		23.4667	102850		23.4667	6602.94		23.4667	14668.5
23.6	40536.7		23.6	38408		23.6	109103		23.6	6667.79		23.6	14631
23.7333	39977.9		23.7333	38955.2		23.7333	113710		23.7333	6774.34		23.7333	14656.3
23.8667	39577.5		23.8667	39224		23.8667	115283		23.8667	6927.62		23.8667	14856.9
24	38957.3		24	39571.5		24	113277		24	7082.92		24	15133.7
24.1333	38507.8		24.1333	40061		24.1333	107910		24.1333	7136.58		24.1333	15232.5
24.2667	38317.8		24.2667	40556.6		24.2667	99095.9		24.2667	7145.08		24.2667	15404.2
24.4	38455.5		24.4	40163.1		24.4	89020.5		24.4	7167.34		24.4	15470.9
24.5333	38745.1		24.5333	38407.2		24.5333	79543.2		24.5333	7195.71		24.5333	15476.3
24.6667	39020.4		24.6667	35876.2		24.6667	71517.5		24.6667	7160.99		24.6667	15351.5
24.8	39697.7		24.8	33289.3		24.8	65141.5		24.8	7062.76		24.8	15323.9
24.9333	40692.1		24.9333	31014.3		24.9333	60039.3		24.9333	6951.94		24.9333	15190.4
25.0667	41964.5		25.0667	29501.2		25.0667	56026.6		25.0667	6963.75		25.0667	15178.3
25.2	43402.8		25.2	28387		25.2	52923.2		25.2	6978.96		25.2	15144.6
25.3333	44964.1		25.3333	27688.3		25.3333	50625.1		25.3333	6972.66		25.3333	15275.3
25.4667	47040		25.4667	27032		25.4667	48833.1		25.4667	6924.47		25.4667	15429.4
25.6	49736		25.6	26470.1		25.6	47337.9		25.6	6881.94		25.6	15655.2
25.7333	53180.8		25.7333	26422.6		25.7333	46255.6		25.7333	6878.67		25.7333	15827.1
25.8667	56910.8		25.8667	26295.1		25.8667	45000.6		25.8667	6873.1		25.8667	15857.4
26	60716.8		26	25858.4		26	43666.2		26	6841.28		26	15906.5
26.1333	64427.6		26.1333	25213.6		26.1333	41983.1		26.1333	6812.35		26.1333	15927.1
26.2667	67877.4		26.2667	24705		26.2667	40434.8		26.2667	6843.74		26.2667	15968.1
26.4	71420		26.4	24601.8		26.4	39285		26.4	6828.69		26.4	15954.7
26.5333	75472		26.5333	24371.8		26.5333	38757.9		26.5333	6789.26		26.5333	15875.3
26.6667	78770.1		26.6667	23890.9		26.6667	38586.9		26.6667	6653.3		26.6667	15705.4
26.8	80625.9		26.8	23264.2		26.8	38842.9		26.8	6519.92		26.8	15530.5
26.9333	80612.4		26.9333	22934.3		26.9333	39476.7		26.9333	6436.68		26.9333	15338.9
27.0667	79753.4		27.0667	22602.7		27.0667	40218.4		27.0667	6419.52		27.0667	15146.8
27.2	78763.2		27.2	22087.9		27.2	40575.5		27.2	6513.86		27.2	15069.3
27.3333	78116.7		27.3333	21262.7		27.3333	40538.4		27.3333	6653.93		27.3333	14952.7
27.4667	78071.5		27.4667	20286.1		27.4667	40912		27.4667	6791.66		27.4667	14950.9
27.6	77850.3		27.6	19390.8		27.6	42187.5		27.6	6924.19		27.6	14921.2
27.7333	76488.9		27.7333	18556.4		27.7333	44303.9		27.7333	7020.06		27.7333	14814.8
27.8667	73454.1		27.8667	17680.7		27.8667	46702.3		27.8667	6975.31		27.8667	14721
28	69588.8		28	16919		28	48427.5		28	6842.35		28	14790.1
28.1333	65411.2		28.1333	16308.7		28.1333	48419.6		28.1333	6780.81		28.1333	14906.7
28.2667	61820.9		28.2667	15922		28.2667	47357.4		28.2667	6810.1		28.2667	15075.4
28.4	59104		28.4	15783.1		28.4	46231		28.4	6871.2		28.4	15059.8
28.5333	57160.4		28.5333	15841.1		28.5333	46207.9		28.5333	6957.27		28.5333	15008.1
28.6667	55701.5		28.6667	16325.2		28.6667	47772.6		28.6667	7000.21		28.6667	15162.4
28.8	53870.2		28.8	16343.9		28.8	50595.2		28.8	6924.9		28.8	15393.8
28.9333	52231.2		28.9333	16026.7		28.9333	53951.8		28.9333	6852.18		28.9333	15598.6
29.0667	50774.7		29.0667	15487.4		29.0667	56766.2		29.0667	6823.95		29.0667	15794.7
29.2	49290.2		29.2	14973.6		29.2	57800.1		29.2	6837.72		29.2	16012.3
29.3333	47923.4		29.3333	14643.5		29.3333	56907.9		29.3333	6947.28		29.3333	16144.8
29.4667	47308.7		29.4667	14347.1		29.4667	54498.9		29.4667	7091.6		29.4667	16159.7
29.6	48026.2		29.6	13994.3		29.6	51249.1		29.6	7154.63		29.6	16246.3
29.7333	48910.6		29.7333	13604.7		29.7333	48517.2		29.7333	7283.37		29.7333	16317.2
29.8667	48778.1		29.8667	13153		29.8667	46220.7		29.8667	7528.15		29.8667	16392
30	47795.3		30	12729.8		30	43941.9		30	7725.69		30	16600.3
30.1333	46271.7		30.1333	12460.2		30.1333	41852.1		30.1333	7892.68		30.1333	16876.6
30.2667	44820.6		30.2667	12155.5		30.2667	40139		30.2667	7981.51		30.2667	17165.3
30.4	43627.9		30.4	11938.6		30.4	38962.8		30.4	8125.24		30.4	17359
30.5333	42507.9		30.5333	11770.3		30.5333	37932.4		30.5333	8347.7		30.5333	17459
30.6667	41591.9		30.6667	11591.7		30.6667	36788.9		30.6667	8595.57		30.6667	17614.8
30.8	40367		30.8	11466.1		30.8	35812.5		30.8	8849.58		30.8	17652.9
30.9333	39078.1		30.9333	11396.8		30.9333	35292.5		30.9333	9114.99		30.9333	17560.3
31.0667	37762		31.0667	11405.7		31.0667	35059.1		31.0667	9336.49		31.0667	17270.6
31.2	36294.7		31.2	11400.9		31.2	35260.3		31.2	9476.07		31.2	17084.8
31.3333	35014.9		31.3333	11373.9		31.3333	35953		31.3333	9416.27		31.3333	16858.3
31.4667	33999.7		31.4667	11436.1		31.4667	37284.2		31.4667	9290.19		31.4667	16584.1
31.6	33212.1		31.6	11667.8		31.6	39935.9		31.6	9131.48		31.6	16233.7
31.7333	32344.2		31.7333	11843		31.7333	42454.2		31.7333	9111.13		31.7333	16079.1
31.8667	31760.8		31.8667	12006.8		31.8667	43344.3		31.8667	9282.95		31.8667	16190.1
32	31611.5		32	12096.6		32	42347.1		32	9659.78		32	16453.4
32.1333	31903.2		32.1333	12095.9		32.1333	40647.1		32.1333	10224.3		32.1333	16697.1
32.2667	32072.4		32.2667	12059		32.2667	39324.3		32.2667	10970.2		32.2667	16687.5
32.4	32216.8		32.4	12002.1		32.4	38577.5		32.4	12097.7		32.4	16495.1
32.5333	32558.8		32.5333	11734.3		32.5333	38079.8		32.5333	13942		32.5333	16364.7
32.6667	33038.3		32.6667	11420		32.6667	37018.2		32.6667	16786.5		32.6667	16382.3
32.8	33621.5		32.8	11016.8		32.8	35201.8		32.8	20243		32.8	16500.2
32.9333	34318.9		32.9333	10551.3		32.9333	33153.5		32.9333	22666.7		32.9333	16769
33.0667	35064.4		33.0667	10063.2		33.0667	31961.3		33.0667	22482.9		33.0667	16997.3
33.2	35891		33.2	9674.18		33.2	31760.6		33.2	20523.8		33.2	17183.5
33.3333	37131.3		33.3333	9362.43		33.3333	32046.8		33.3333	18298.4		33.3333	17520.4
33.4667	38596.1		33.4667	9037.98		33.4667	32009.2		33.4667	16670.2		33.4667	17809.2
33.6	40285.3		33.6	8733.26		33.6	31346.5		33.6	15880.8		33.6	18091.9
33.7333	41757.7		33.7333	8466.74		33.7333	30140.2		33.7333	15535.7		33.7333	18495.3
33.8667	42939.1		33.8667	8202.1		33.8667	28909.2		33.8667	15453.3		33.8667	18964.4
34	43261.1		34	7939.38		34	28327.4		34	15497.4		34	19436.9
34.1333	42417		34.1333	7669.94		34.1333	28275.6		34.1333	15714.9		34.1333	19888.6
34.2667	40798.9		34.2667	7321.48		34.2667	28473.7		34.2667	15954.1		34.2667	20208.1
34.4	38971.9		34.4	7036.35		34.4	28722.6		34.4	16446.6		34.4	20333.3
34.5333	37358		34.5333	6791.36		34.5333	29183.1		34.5333	17175.5		34.5333	20248.2
34.6667	36342.1		34.6667	6608.68		34.6667	29694.6		34.6667	18140.7		34.6667	20124
34.8	35588.1		34.8	6515.13		34.8	30212.2		34.8	18832.2		34.8	20008.7
34.9333	35093.9		34.9333	6439.59		34.9333	30938.9		34.9333	19478.6		34.9333	20181.9
35.0667	34641.1		35.0667	6320.4		35.0667	31680.1		35.0667	20213.6		35.0667	20687
35.2	34350.1		35.2	6244.67		35.2	32347.5		35.2	21172.5		35.2	21514.3
35.3333	34289.2		35.3333	6142.03		35.3333	32556.7		35.3333	22313.8		35.3333	22862
35.4667	34047.1		35.4667	6070.39		35.4667	32604.8		35.4667	23756.5		35.4667	24525.6
35.6	33614.7		35.6	6021.1		35.6	32611		35.6	25596		35.6	26709
35.7333	33188.9		35.7333	5975.4		35.7333	32659.5		35.7333	28029.8		35.7333	29195.6
35.8667	32711.1		35.8667	5945.1		35.8667	33238.1		35.8667	31349.6		35.8667	32369.1
36	32025.9		36	5934.12		36	33857.6		36	35782.1		36	35877.7
36.1333	31136.4		36.1333	5881.58		36.1333	34505.2		36.1333	41148.2		36.1333	37934
36.2667	30131.6		36.2667	5841.38		36.2667	35050.6		36.2667	46573.3		36.2667	37420.8
36.4	29142.8		36.4	5892.03		36.4	35524.5		36.4	51024.5		36.4	35533.4
36.5333	28389		36.5333	5978.55		36.5333	35983		36.5333	53271.1		36.5333	33704.4
36.6667	27772.4		36.6667	6012.98		36.6667	36217.6		36.6667	53441.9		36.6667	32250.1
36.8	27083.8		36.8	6008.52		36.8	36015.9		36.8	52975		36.8	31297.2
36.9333	26465.9		36.9333	5981.31		36.9333	35811.2		36.9333	52832.1		36.9333	30964.4
37.0667	25944.8		37.0667	5947.11		37.0667	36044.3		37.0667	53518.8		37.0667	31012.4
37.2	25656.2		37.2	5884.25		37.2	36765.9		37.2	53997.1		37.2	31245.6
37.3333	25339.5		37.3333	5856.72		37.3333	37810.4		37.3333	52789.9		37.3333	31392.8
37.4667	25070.5		37.4667	5831.14		37.4667	38847.7		37.4667	50672.7		37.4667	31646.1
37.6	24918.5		37.6	5828.22		37.6	39540		37.6	48730.6		37.6	32118.2
37.7333	24785.3		37.7333	5800.23		37.7333	39905.7		37.7333	47307.7		37.7333	32888.9
37.8667	24812		37.8667	5782.85		37.8667	39776.5		37.8667	46495.1		37.8667	33695.7
38	24727.8		38	5699.6		38	39426.9		38	46471		38	34583.1
38.1333	24603.7		38.1333	5676.2		38.1333	39104.7		38.1333	46737.2		38.1333	35225
38.2667	24436.1		38.2667	5644.31		38.2667	38575.8		38.2667	46851.3		38.2667	35609.7
38.4	24348.4		38.4	5603.91		38.4	37724.4		38.4	46459.2		38.4	35691
38.5333	24275.6		38.5333	5545.68		38.5333	36742.6		38.5333	45703.2		38.5333	35333.2
38.6667	24247.7		38.6667	5517.6		38.6667	36030.4		38.6667	45473.2		38.6667	34914.1
38.8	24241.3		38.8	5495.65		38.8	35566.5		38.8	45601.8		38.8	34497.5
38.9333	24506		38.9333	5476.66		38.9333	35284.8		38.9333	45846.8		38.9333	34680.2
39.0667	24906.6		39.0667	5480.69		39.0667	34725.1		39.0667	46149.2		39.0667	35421.2
39.2	25456.6		39.2	5495.22		39.2	33488.4		39.2	46423.9		39.2	36416.2
39.3333	26139.6		39.3333	5512.5		39.3333	31958.7		39.3333	46737.6		39.3333	37117.9
39.4667	27004.8		39.4667	5478.11		39.4667	30480.9		39.4667	46360.3		39.4667	37422.8
39.6	27757.3		39.6	5470.3		39.6	29130.3		39.6	45327.5		39.6	37307.4
39.7333	28584.7		39.7333	5517.15		39.7333	27745.1		39.7333	44503.6		39.7333	36659.7
39.8667	29699.1		39.8667	5534.21		39.8667	26322.8		39.8667	44034		39.8667	34987.5
40	30917		40	5507.24		40	25072.3		40	44078.8		40	32379.6
40.1333	32089.7		40.1333	5486.46		40.1333	23981.3		40.1333	44609.7		40.1333	29937.4
40.2667	32908		40.2667	5503.25		40.2667	23285.3		40.2667	45710.6		40.2667	28140
40.4	33509.8		40.4	5524.64		40.4	22762.9		40.4	46595.5		40.4	26887.2
40.5333	33989.8		40.5333	5517.48		40.5333	22256		40.5333	46610.6		40.5333	25739.2
40.6667	34553.8		40.6667	5529.9		40.6667	21664.2		40.6667	46026		40.6667	24479.7
40.8	35241.8		40.8	5564.7		40.8	21264.7		40.8	45357.8		40.8	23358.9
40.9333	35973.1		40.9333	5601.45		40.9333	21472.8		40.9333	44873.1		40.9333	22313.9
41.0667	37165.8		41.0667	5610.48		41.0667	22641.3		41.0667	44576.6		41.0667	21383.2
41.2	38947.6		41.2	5645.7		41.2	24905.4		41.2	44064.6		41.2	20544.6
41.3333	41147.1		41.3333	5728.81		41.3333	28920		41.3333	43355.3		41.3333	19892.4
41.4667	43697.4		41.4667	5791.45		41.4667	34694.7		41.4667	42463.5		41.4667	19200.4
41.6	46103.4		41.6	5821.02		41.6	40848.5		41.6	41442.8		41.6	18533.3
41.7333	47859.8		41.7333	5777.74		41.7333	44922.7		41.7333	40791.1		41.7333	18064.3
41.8667	49050.3		41.8667	5669.4		41.8667	45725.9		41.8667	40948		41.8667	17535.3
42	50250.5		42	5545.07		42	44087.7		42	41961		42	17112.7
42.1333	51138.8		42.1333	5446.94		42.1333	41246.6		42.1333	43634.9		42.1333	16720
42.2667	51670.8		42.2667	5292.36		42.2667	37891.9		42.2667	46582.2		42.2667	16434.6
42.4	51815.2		42.4	5142.43		42.4	33926.5		42.4	51021.7		42.4	16170.5
42.5333	51598		42.5333	5047.7		42.5333	29758		42.5333	57043.9		42.5333	15855.9
42.6667	51199.4		42.6667	5031.95		42.6667	26079.3		42.6667	59393.2		42.6667	15434.9
42.8	50674.8		42.8	5010.43		42.8	23446.5		42.8	56803.7		42.8	14935.2
42.9333	49710.1		42.9333	5006.45		42.9333	21784		42.9333	50826.9		42.9333	14501.5
43.0667	48683.5		43.0667	5012.45		43.0667	20741.8		43.0667	42153.9		43.0667	14324.5
43.2	47752.2		43.2	5003.59		43.2	19995.9		43.2	34825.6		43.2	14214
43.3333	46988.1		43.3333	5042		43.3333	19453.4		43.3333	29312.6		43.3333	14203.1
43.4667	46213.4		43.4667	5109.92		43.4667	19088.6		43.4667	25012.7		43.4667	14288.4
43.6	45407.5		43.6	5140.2		43.6	18770.4		43.6	21992.1		43.6	14386.7
43.7333	44738.9		43.7333	5189.79		43.7333	18458.1		43.7333	20070.4		43.7333	14459.8
43.8667	44027.2		43.8667	5200.6		43.8667	18274.6		43.8667	18698.9		43.8667	14227.4
44	43333.4		44	5207.16		44	18165.9		44	17677.1		44	13840.3
44.1333	42363.8		44.1333	5222.73		44.1333	18069.9		44.1333	16847.7		44.1333	13498.8
44.2667	41193.3		44.2667	5226.47		44.2667	17964.2		44.2667	16120		44.2667	13188.9
44.4	39984.2		44.4	5247.97		44.4	17998.5		44.4	15719.8		44.4	12979.2
44.5333	38747		44.5333	5308.95		44.5333	17973.3		44.5333	15842.1		44.5333	12816.8
44.6667	37862.8		44.6667	5382.56		44.6667	17910.9		44.6667	16345.4		44.6667	12667.7
44.8	37369.1		44.8	5399.41		44.8	17884.4		44.8	17018.2		44.8	12562.1
44.9333	37005.6		44.9333	5358.76		44.9333	17946.2		44.9333	17627.6		44.9333	12460
45.0667	36621.6		45.0667	5328.52		45.0667	18076.1		45.0667	17984.3		45.0667	12405.6
45.2	36137.1		45.2	5271.1		45.2	18307		45.2	18000.3		45.2	12433.1
45.3333	35721		45.3333	5211.87		45.3333	18586.8		45.3333	17870.8		45.3333	12569
45.4667	35207.1		45.4667	5231.84		45.4667	18923.9		45.4667	17571.8		45.4667	12612.7
45.6	34795		45.6	5243.79		45.6	19465.7		45.6	17069.1		45.6	12649.9
45.7333	34207.6		45.7333	5338.88		45.7333	19891.1		45.7333	16342.3		45.7333	12698.8
45.8667	33402.2		45.8667	5402.64		45.8667	20147.4		45.8667	15619.6		45.8667	12652.3
46	32547.9		46	5464.45		46	20283		46	15104.1		46	12641.1
46.1333	31701.5		46.1333	5480.53		46.1333	20450.8		46.1333	14696.8		46.1333	12842.1
46.2667	30897		46.2667	5488.15		46.2667	20660.9		46.2667	14348.1		46.2667	13331.1
46.4	30162.4		46.4	5491.94		46.4	20771.9		46.4	14154.7		46.4	13966.9
46.5333	29332.2		46.5333	5455.34		46.5333	20855.6		46.5333	14086.6		46.5333	14517.3
46.6667	28631.9		46.6667	5435.51		46.6667	20823.2		46.6667	13985.8		46.6667	14941.2
46.8	28303.2		46.8	5401.08		46.8	20794.1		46.8	13799.5		46.8	15191.7
46.9333	28212.9		46.9333	5385.62		46.9333	20714.3		46.9333	13459.1		46.9333	15250.2
47.0667	27631.9		47.0667	5385.04		47.0667	20637.2		47.0667	13150.3		47.0667	15221
47.2	26611.5		47.2	5375.23		47.2	20637.6		47.2	12836.1		47.2	14888.1
47.3333	25571		47.3333	5371.4		47.3333	20682		47.3333	12697.6		47.3333	14002.8
47.4667	24779.7		47.4667	5403.9		47.4667	20887.3		47.4667	12714.8		47.4667	12923.8
47.6	24676.4		47.6	5402.22		47.6	21004.2		47.6	12739.5		47.6	11762.9
47.7333	24891.5		47.7333	5415.49		47.7333	20770.6		47.7333	12688.4		47.7333	10808.6
47.8667	25081.1		47.8667	5401.22		47.8667	20035.1		47.8667	12558.2		47.8667	10069.5
48	24933.8		48	5413.27		48	18798.4		48	12536.8		48	9453.26
48.1333	24589.9		48.1333	5477.03		48.1333	17325.6		48.1333	12632.8		48.1333	9007.48
48.2667	24032.3		48.2667	5487.77		48.2667	16089.7		48.2667	12717.1		48.2667	8580.46
48.4	23543.8		48.4	5448.89		48.4	15162.5		48.4	12724.1		48.4	8248.11
48.5333	22893.2		48.5333	5394.07		48.5333	14514		48.5333	12682.4		48.5333	7984.05
48.6667	22185.5		48.6667	5344.11		48.6667	14142		48.6667	12457.3		48.6667	7835.89
48.8	21358.1		48.8	5329.34		48.8	13713.2		48.8	12272.6		48.8	7732.05
48.9333	20510.1		48.9333	5359.09		48.9333	13337.5		48.9333	12118.7		48.9333	7732.11
49.0667	19550		49.0667	5364.87		49.0667	13010.4		49.0667	12110.1		49.0667	7781.32
49.2	18618.3		49.2	5399.59		49.2	12653.1		49.2	12062.7		49.2	7838.54
49.3333	17651.4		49.3333	5438.09		49.3333	12375.7		49.3333	11970.5		49.3333	7818.65
49.4667	16670.3		49.4667	5463.34		49.4667	12229.8		49.4667	11796.9		49.4667	7721.12
49.6	15837.3		49.6	5500.33		49.6	12170.5		49.6	11649.5		49.6	7608.61
49.7333	15275.1		49.7333	5506.65		49.7333	12140.6		49.7333	11556		49.7333	7455.69
49.8667	14823.7		49.8667	5496.75		49.8667	12073		49.8667	11548		49.8667	7398.2
50	14618.4		50	5505.94		50	12020.3		50	11643.5		50	7395.74
50.1333	14566.9		50.1333	5518.31		50.1333	11969.7		50.1333	11765.2		50.1333	7395.75
50.2667	14552.2		50.2667	5493.74		50.2667	11857.8		50.2667	11877.7		50.2667	7458.96
50.4	14328.8		50.4	5488.15		50.4	11786.9		50.4	11877.8		50.4	7504.12
50.5333	13911.4		50.5333	5434.06		50.5333	11644.4		50.5333	11678.7		50.5333	7537.23
50.6667	13446.1		50.6667	5417.95		50.6667	11585.7		50.6667	11415.9		50.6667	7497.08
50.8	13021.2		50.8	5378.93		50.8	11505.1		50.8	11141.5		50.8	7413.12
50.9333	12813.2		50.9333	5353.12		50.9333	11521.6		50.9333	10907		50.9333	7346.29
51.0667	12668.4		51.0667	5333.49		51.0667	11626		51.0667	10752		51.0667	7344.29
51.2	12533.3		51.2	5320.51		51.2	11848.5		51.2	10743.4		51.2	7373.45
51.3333	12382		51.3333	5288.6		51.3333	12096.9		51.3333	10741.2		51.3333	7321.52
51.4667	12297.6		51.4667	5307.4		51.4667	12211.5		51.4667	10710.3		51.4667	7294.64
51.6	12303.5		51.6	5328.16		51.6	12224.1		51.6	10655.8		51.6	7292.55
51.7333	12265.3		51.7333	5344.63		51.7333	12168.9		51.7333	10702.8		51.7333	7331.64
51.8667	12235		51.8667	5356.93		51.8667	12077.6		51.8667	10713.7		51.8667	7369.34
52	12239.9		52	5393.24		52	11918.8		52	10669.6		52	7357.74
52.1333	12232.3		52.1333	5424.64		52.1333	11843.4		52.1333	10584.9		52.1333	7388.37
52.2667	12128.6		52.2667	5411.47		52.2667	11766		52.2667	10523.9		52.2667	7408.67
52.4	11879.8		52.4	5393.66		52.4	11773.4		52.4	10488.4		52.4	7390.62
52.5333	11581.1		52.5333	5345.06		52.5333	11839.1		52.5333	10465.3		52.5333	7311.82
52.6667	11319.1		52.6667	5337.94		52.6667	11920.1		52.6667	10274.2		52.6667	7276.5
52.8	11227.8		52.8	5361.91		52.8	12036.4		52.8	9906.98		52.8	7248.73
52.9333	11246.5		52.9333	5357.54		52.9333	12265.7		52.9333	9593.59		52.9333	7258.56
53.0667	11290.2		53.0667	5353.22		53.0667	12632.5		53.0667	9379.2		53.0667	7281.77
53.2	11343.7		53.2	5345.26		53.2	13000.3		53.2	9355.73		53.2	7315.96
53.3333	11365.6		53.3333	5333.96		53.3333	13040.5		53.3333	9319.86		53.3333	7266.69
53.4667	11487.2		53.4667	5340.56		53.4667	12384.6		53.4667	9339.37		53.4667	7181.95
53.6	11723.6		53.6	5302.22		53.6	11559.3		53.6	9264.72		53.6	7192
53.7333	11923.4		53.7333	5304.85		53.7333	10874.1		53.7333	9306.77		53.7333	7200.58
53.8667	12020.4		53.8667	5271.91		53.8667	10556.7		53.8667	9265.28		53.8667	7240.76
54	12091		54	5243.09		54	10546.8		54	9210.93		54	7361.19
54.1333	12151.9		54.1333	5221.9		54.1333	10627.8		54.1333	9048.75		54.1333	7363.69
54.2667	12190.4		54.2667	5191.16		54.2667	10645.1		54.2667	8863.63		54.2667	7338.81
54.4	12102.4		54.4	5169.23		54.4	10545.6		54.4	8724.17		54.4	7294.25
54.5333	11943.5		54.5333	5182.59		54.5333	10430.5		54.5333	8678.65		54.5333	7221.97
54.6667	11810.3		54.6667	5179.8		54.6667	10269.3		54.6667	8584.79		54.6667	7181.62
54.8	11794.8		54.8	5201.07		54.8	10093.6		54.8	8437.7		54.8	7144.11
54.9333	11913.2		54.9333	5263.83		54.9333	9950.64		54.9333	8326.65		54.9333	7110.91
55.0667	12033		55.0667	5324.97		55.0667	9742.16		55.0667	8284.63		55.0667	7047.64
55.2	12039.7		55.2	5327.06		55.2	9584.88		55.2	8192.17		55.2	6988.11
55.3333	11975.4		55.3333	5305.64		55.3333	9513.77		55.3333	8048.13		55.3333	6990.29
55.4667	11798.3		55.4667	5281.43		55.4667	9471.07		55.4667	7928.55		55.4667	7029.28
55.6	11601		55.6	5311.32		55.6	9419.34		55.6	7863.01		55.6	7089.48
55.7333	11391.7		55.7333	5312.78		55.7333	9368.43		55.7333	7851.79		55.7333	7169.57
55.8667	11205.3		55.8667	5342.19		55.8667	9374.15		55.8667	7816.81		55.8667	7246.34
56	11121		56	5345.96		56	9376.76		56	7769.58		56	7239.57
56.1333	10972.3		56.1333	5322.14		56.1333	9313.86		56.1333	7778.31		56.1333	7199.31
56.2667	10886.7		56.2667	5270.27		56.2667	9223.38		56.2667	7821.85		56.2667	7166.13
56.4	10817.6		56.4	5259.58		56.4	9184.6		56.4	7837.67		56.4	7115.07
56.5333	10791.1		56.5333	5267.02		56.5333	9187.5		56.5333	7868.74		56.5333	7056.93
56.6667	10768.6		56.6667	5295.21		56.6667	9220.57		56.6667	7963.34		56.6667	7002.16
56.8	10706.2		56.8	5352.53		56.8	9237.03		56.8	8044.34		56.8	6948.63
56.9333	10581.8		56.9333	5437.59		56.9333	9200.85		56.9333	8011.23		56.9333	6888.21
57.0667	10497.6		57.0667	5431.98		57.0667	9182.76		57.0667	7919.87		57.0667	6781.75
57.2	10372.5		57.2	5429.31		57.2	9179.36		57.2	7804.05		57.2	6700.19
57.3333	10256.6		57.3333	5433.14		57.3333	9281.74		57.3333	7801.82		57.3333	6650.49
57.4667	10211.6		57.4667	5474.67		57.4667	9381.96		57.4667	7786.98		57.4667	6544.68
57.6	10265.9		57.6	5546.34		57.6	9479.34		57.6	7888.82		57.6	6465.33
57.7333	10323.8		57.7333	5605.38		57.7333	9580.44		57.7333	7908.68		57.7333	6362.31
57.8667	10309.3		57.8667	5641.96		57.8667	9553.34		57.8667	7886.36		57.8667	6302.92
58	10320.7		58	5613.19		58	9501.43		58	7889.83		58	6227.96
58.1333	10236.5		58.1333	5585.44		58.1333	9419.87		58.1333	7811.84		58.1333	6147.09
58.2667	10147.2		58.2667	5545.61		58.2667	9257.37		58.2667	7735.76		58.2667	6119.95
58.4	10058.6		58.4	5557.85		58.4	9169.5		58.4	7701.86		58.4	6136.03
58.5333	10041.7		58.5333	5563.64		58.5333	9089.39		58.5333	7731.12		58.5333	6127.15
58.6667	9984.77		58.6667	5484.39		58.6667	9082.17		58.6667	7745.5		58.6667	6096.88
58.8	9876.72		58.8	5393.11		58.8	9144.87		58.8	7779.08		58.8	6040.02
58.9333	9722.82		58.9333	5328.62		58.9333	9175.05		58.9333	7749.15		58.9333	6060.98
59.0667	9554.69		59.0667	5310.28		59.0667	9242.15		59.0667	7745.94		59.0667	6117.34
59.2	9359.87		59.2	5330.6		59.2	9313.37		59.2	7760.15		59.2	6225.39
59.3333	9317.64		59.3333	5398.53		59.3333	9356.48		59.3333	7685.92		59.3333	6246.6
59.4667	9256.58		59.4667	5420		59.4667	9360.48		59.4667	7579.61		59.4667	6165.71
59.6	9157.68		59.6	5397.11		59.6	9364.99		59.6	7521.22		59.6	6101.16
59.7333	9084.63		59.7333	5391.36		59.7333	9374.01		59.7333	7484.33		59.7333	6031.11
59.8667	9168.75		59.8667	5424.47		59.8667	9341.02		59.8667	7507.53		59.8667	5994.43
60	9327.53		60	5539.25		60	9252.1		60	7531.42		60	5975.26
60.1333	9483.65		60.1333	5637.91		60.1333	9130.21		60.1333	7561.56		60.1333	5976.83
60.2667	9547.82		60.2667	5766.08		60.2667	9044.5		60.2667	7511.32		60.2667	5987.99
60.4	9537.88		60.4	5900		60.4	9004.75		60.4	7486.59		60.4	5994.05
60.5333	9557.28		60.5333	5968.36		60.5333	8948.06		60.5333	7512.27		60.5333	5981.1
60.6667	9588.26		60.6667	6065		60.6667	8956.68		60.6667	7667.85		60.6667	5963.85
60.8	9540.41		60.8	6217.47		60.8	8996.31		60.8	7856.14		60.8	5978.27
60.9333	9406.58		60.9333	6352.38		60.9333	8999.43		60.9333	7937.02		60.9333	5925.09
61.0667	9246.15		61.0667	6471.77		61.0667	9040.05		61.0667	7932.52		61.0667	5833.91
61.2	9185.94		61.2	6547.52		61.2	9032.79		61.2	7927.66		61.2	5707.32
61.3333	9214.57		61.3333	6576.6		61.3333	9164.84		61.3333	7915.57		61.3333	5650.83
61.4667	9234.15		61.4667	6589.94		61.4667	9302.24		61.4667	7926.47		61.4667	5635.78
61.6	9206.31		61.6	6644.92		61.6	9428.56		61.6	8030.71		61.6	5702.2
61.7333	9174.28		61.7333	6734.49		61.7333	9397.76		61.7333	8140.73		61.7333	5770.06
61.8667	9119.4		61.8667	6751.84		61.8667	9322.5		61.8667	8113.79		61.8667	5717.48
62	9067.86		62	6724.78		62	9235.34		62	7952.28		62	5690.84
62.1333	8990.81		62.1333	6738.52		62.1333	9230.38		62.1333	7798.79		62.1333	5625.71
62.2667	8953.58		62.2667	6762.78		62.2667	9257.88		62.2667	7610.2		62.2667	5623.16
62.4	8983.31		62.4	6804.27		62.4	9243.69		62.4	7516.08		62.4	5624.16
62.5333	9119.26		62.5333	6816.23		62.5333	9282.42		62.5333	7512.19		62.5333	5623.67
62.6667	9198.44		62.6667	6828.73		62.6667	9293.99		62.6667	7582.15		62.6667	5587.07
62.8	9226.09		62.8	6862.88		62.8	9347.51		62.8	7837.1		62.8	5558.2
62.9333	9173.59		62.9333	6925.42		62.9333	9382.09		62.9333	8046.12		62.9333	5558.46
63.0667	9133.13		63.0667	6905.52		63.0667	9449.74		63.0667	8054.47		63.0667	5575.41
63.2	8990.83		63.2	6816.75		63.2	9574.31		63.2	7814.43		63.2	5619.52
63.3333	8858.49		63.3333	6729.85		63.3333	9651.7		63.3333	7531.47		63.3333	5704.94
63.4667	8766.48		63.4667	6604.75		63.4667	9633.34		63.4667	7411.92		63.4667	5773.89
63.6	8722.61		63.6	6522.55		63.6	9656.15		63.6	7444.94		63.6	5764.25
63.7333	8578.31		63.7333	6400.31		63.7333	9659.03		63.7333	7499.21		63.7333	5740.35
63.8667	8490.22		63.8667	6228.8		63.8667	9611.9		63.8667	7430.02		63.8667	5710.36
64	8442.84		64	6109.36		64	9640.54		64	7164.68		64	5716.78
64.1333	8394.26		64.1333	6081.14		64.1333	9695.04		64.1333	6838.43		64.1333	5720.15
64.2667	8337.1		64.2667	6085.58		64.2667	9738.1		64.2667	6560.95		64.2667	5726.39
64.4	8307.76		64.4	6065.28		64.4	9703.32		64.4	6419.7		64.4	5676.48
64.5333	8267.11		64.5333	6014.25		64.5333	9606.82		64.5333	6256.06		64.5333	5656.33
64.6667	8203.88		64.6667	5963.64		64.6667	9612.01		64.6667	6107.02		64.6667	5647.07
64.8	8149.71		64.8	5915.86		64.8	9581.53		64.8	5977.98		64.8	5583.26
64.9333	8107.25		64.9333	5880.14		64.9333	9578.4		64.9333	5899.51		64.9333	5477.08
65.0667	8060.55		65.0667	5817.95		65.0667	9617.46		65.0667	5851.61		65.0667	5358.99
65.2	8000.94		65.2	5791.55		65.2	9652.38		65.2	5738.51		65.2	5293.98
65.3333	7968.01		65.3333	5751.12		65.3333	9697.36		65.3333	5626.23		65.3333	5252.66
65.4667	7969.91		65.4667	5757.56		65.4667	9750.6		65.4667	5547.59		65.4667	5243.31
65.6	8029.94		65.6	5679.23		65.6	9829.99		65.6	5483.67		65.6	5230.34
65.7333	8021.98		65.7333	5608.57		65.7333	9862.03		65.7333	5458.86		65.7333	5201.87
65.8667	8007		65.8667	5585.12		65.8667	9867.7		65.8667	5417.78		65.8667	5175.75
66	7918.3		66	5537.14		66	9862.5		66	5375.18		66	5174.85
66.1333	7861.9		66.1333	5511.88		66.1333	9805.96		66.1333	5348.64		66.1333	5139.91
66.2667	7827.18		66.2667	5381.66		66.2667	9857.36		66.2667	5376.34		66.2667	5101.28
66.4	7787.3		66.4	5183.81		66.4	9895.69		66.4	5458.18		66.4	5088.58
66.5333	7726.89		66.5333	4885.02		66.5333	9864.3		66.5333	5495.74		66.5333	5060.04
66.6667	7606.47		66.6667	4576.73		66.6667	9795.25		66.6667	5585.54		66.6667	5056.55
66.8	7519.12		66.8	4278.24		66.8	9760.82		66.8	5634.67		66.8	5025.65
66.9333	7504.12		66.9333	4033.74		66.9333	9711.22		66.9333	5654.68		66.9333	5004.65
67.0667	7515.61		67.0667	3849.7		67.0667	9684.18		67.0667	5618.47		67.0667	4963.51
67.2	7527.13		67.2	3703.71		67.2	9688.49		67.2	5595.01		67.2	4955.78
67.3333	7568.03		67.3333	3576.45		67.3333	9760.1		67.3333	5543.48		67.3333	4952.17
67.4667	7565.91		67.4667	3460.43		67.4667	9786.27		67.4667	5528.24		67.4667	4966.44
67.6	7586.09		67.6	3370.64		67.6	9775.61		67.6	5555.43		67.6	4990.27
67.7333	7583.85		67.7333	3322.27		67.7333	9677.24		67.7333	5652.62		67.7333	5004.42
67.8667	7538.77		67.8667	3281.15		67.8667	9595.86		67.8667	5731.56		67.8667	4977.48
68	7500.77		68	3261.28		68	9574.24		68	5716.78		68	4933.37
68.1333	7510.37		68.1333	3232.32		68.1333	9556.86		68.1333	5625.02		68.1333	4854.93
Sum	5.63113e+06		Sum	4.64831e+06		Sum	5.50075e+06		Sum	6.4137e+06		Sum	6.21392e+06		Average	5.68156e+06		WT Average	5.60949e+06
Normalized to WT Average	1.00386		Normalized to WT Average	0.82865		Normalized to WT Average	0.980614		Normalized to WT Average	1.14336		Normalized to WT Average	1.10775		Normalized to WT Average	1.01285

## Sheet: WT 091919
WT neuron 1 z stack_405_561_640				WT neuron 2 z stack_405_561_640				WT neuron 3 z stack_405_561_640				WT neuron 4 z stack_405_561_640				WT neuron 5 z stack_405_561_640
Distance_(microns)	Gray_Value			Distance_(microns)	Gray_Value			Distance_(microns)	Gray_Value			Distance_(microns)	Gray_Value			Distance_(microns)	Gray_Value
0	5035.65			0	5974.69			0	4712.62			0	5611.55			0	3880.54
0.1333	5044.69			0.1333	6006.55			0.1333	4704.61			0.1333	5459.35			0.1333	3867.06
0.2667	5042.83			0.2667	6130.84			0.2667	4718.81			0.2667	5266.43			0.2667	3856.84
0.4	5053.52			0.4	6314.81			0.4	4719.88			0.4	5148.19			0.4	3897
0.5333	5038.81			0.5333	6554.44			0.5333	4738.97			0.5333	5011.24			0.5333	3927.16
0.6667	5076.89			0.6667	6892.06			0.6667	4773.41			0.6667	4968.01			0.6667	3924.17
0.8	5015.6			0.8	7256.32			0.8	4747.85			0.8	4887.71			0.8	3927.17
0.9333	5063.89			0.9333	7703.54			0.9333	4775.01			0.9333	4834.64			0.9333	3911.31
1.0667	5098.96			1.0667	8177			1.0667	4759.43			1.0667	4812.77			1.0667	3924.33
1.2	5187.84			1.2	8690.09			1.2	4770.4			1.2	4822.56			1.2	3947.41
1.3333	5188.86			1.3333	9253.48			1.3333	4736.9			1.3333	4769.62			1.3333	3936.21
1.4667	5238.33			1.4667	9552.21			1.4667	4688.07			1.4667	4708.38			1.4667	3933.98
1.6	5248.2			1.6	9542.97			1.6	4698.59			1.6	4693.8			1.6	3942.67
1.7333	5241.94			1.7333	9409.54			1.7333	4744.69			1.7333	4669.59			1.7333	3994.54
1.8667	5255.62			1.8667	9090.6			1.8667	4706.09			1.8667	4589.08			1.8667	3974.18
2	5187.31			2	8830.52			2	4703.38			2	4601.36			2	3989.22
2.1333	5208.18			2.1333	8581.52			2.1333	4717.61			2.1333	4585.53			2.1333	3991.96
2.2667	5248.93			2.2667	8356.76			2.2667	4712.07			2.2667	4606.47			2.2667	4037.05
2.4	5252.57			2.4	8158.69			2.4	4710.57			2.4	4546.48			2.4	4034.71
2.5333	5250.78			2.5333	8044.54			2.5333	4684.36			2.5333	4512.85			2.5333	4048.86
2.6667	5230			2.6667	7900.98			2.6667	4705.93			2.6667	4475.59			2.6667	4027.99
2.8	5228.34			2.8	7743.1			2.8	4729.79			2.8	4494.48			2.8	4050.36
2.9333	5228.56			2.9333	7665.36			2.9333	4723.75			2.9333	4496.32			2.9333	4073.09
3.0667	5260.16			3.0667	7645.77			3.0667	4721.27			3.0667	4473.09			3.0667	4058.15
3.2	5303.32			3.2	7568.99			3.2	4713.31			3.2	4462.23			3.2	4086.03
3.3333	5247.23			3.3333	7543.98			3.3333	4682.4			3.3333	4405.22			3.3333	4098.98
3.4667	5249.77			3.4667	7583.15			3.4667	4676.93			3.4667	4413.97			3.4667	4127.24
3.6	5240.82			3.6	7621.44			3.6	4681.84			3.6	4407.72			3.6	4125.3
3.7333	5228.51			3.7333	7721.57			3.7333	4633.74			3.7333	4377.76			3.7333	4148.34
3.8667	5191.53			3.8667	7737.38			3.8667	4640.02			3.8667	4348.37			3.8667	4167.99
4	5214.69			4	7775.88			4	4672.36			4	4321.9			4	4215.56
4.1333	5211.97			4.1333	7798.59			4.1333	4690.32			4.1333	4295.65			4.1333	4199.65
4.2667	5159.27			4.2667	7745.31			4.2667	4701.08			4.2667	4292.66			4.2667	4187.08
4.4	5059.13			4.4	7835.66			4.4	4702.21			4.4	4274.45			4.4	4167.89
4.5333	5020.13			4.5333	7762.52			4.5333	4711.07			4.5333	4311.39			4.5333	4165.11
4.6667	5045.32			4.6667	7835.2			4.6667	4719.83			4.6667	4296.34			4.6667	4148.44
4.8	5052.84			4.8	7821.26			4.8	4745.58			4.8	4318.44			4.8	4119.19
4.9333	5035.93			4.9333	7852.41			4.9333	4749.71			4.9333	4312.33			4.9333	4103.75
5.0667	5064.58			5.0667	7898.85			5.0667	4747.28			5.0667	4315.46			5.0667	4089.17
5.2	5112.3			5.2	7846.47			5.2	4763.08			5.2	4318.44			5.2	4107.67
5.3333	5079.56			5.3333	7755.43			5.3333	4723.33			5.3333	4302.78			5.3333	4116.69
5.4667	5065.69			5.4667	7665.77			5.4667	4728.29			5.4667	4270.4			5.4667	4102.18
5.6	5049.88			5.6	7544.31			5.6	4754.59			5.6	4264.37			5.6	4098.52
5.7333	5051.72			5.7333	7444.43			5.7333	4765.16			5.7333	4299.98			5.7333	4112.25
5.8667	5075.52			5.8667	7416.24			5.8667	4796.3			5.8667	4313			5.8667	4111.72
6	5137.47			6	7412.19			6	4820.6			6	4311.46			6	4088.99
6.1333	5099.68			6.1333	7366.78			6.1333	4843.42			6.1333	4331.45			6.1333	4106.75
6.2667	5120.06			6.2667	7312.85			6.2667	4854.5			6.2667	4340.73			6.2667	4102.67
6.4	5120.65			6.4	7268			6.4	4880.67			6.4	4348.47			6.4	4115.24
6.5333	5150.86			6.5333	7198.66			6.5333	4879.7			6.5333	4344.95			6.5333	4110.72
6.6667	5118.67			6.6667	7204.52			6.6667	4920.92			6.6667	4318.54			6.6667	4114.64
6.8	5142.06			6.8	7193.28			6.8	4946.62			6.8	4355.09			6.8	4115.53
6.9333	5111.79			6.9333	7210.38			6.9333	4992.77			6.9333	4341.59			6.9333	4107.41
7.0667	5104.81			7.0667	7143.58			7.0667	5069.47			7.0667	4325.55			7.0667	4111.98
7.2	5083.37			7.2	7193.41			7.2	5136.1			7.2	4318.13			7.2	4113.25
7.3333	5069.49			7.3333	7192.44			7.3333	5236.18			7.3333	4332.16			7.3333	4137.56
7.4667	5049.26			7.4667	7178.84			7.4667	5347.33			7.4667	4353.6			7.4667	4155.5
7.6	5052.25			7.6	7101.25			7.6	5446.27			7.6	4337.62			7.6	4154.58
7.7333	5003.06			7.7333	7095.45			7.7333	5617.42			7.7333	4345.25			7.7333	4190.01
7.8667	5003.46			7.8667	7074.74			7.8667	5876.38			7.8667	4342.6			7.8667	4220.45
8	4979.62			8	7093.94			8	6199.59			8	4334.64			8	4264.72
8.1333	4973.48			8.1333	7091.15			8.1333	6611.01			8.1333	4304.36			8.1333	4265.61
8.2667	4967.07			8.2667	7090.07			8.2667	7067.65			8.2667	4308.93			8.2667	4277.8
8.4	4991.19			8.4	7097.82			8.4	7452.15			8.4	4295.85			8.4	4325.27
8.5333	4952.57			8.5333	7161.41			8.5333	7774.41			8.5333	4277.18			8.5333	4341.22
8.6667	4986.23			8.6667	7150.9			8.6667	7875.57			8.6667	4295.19			8.6667	4363.5
8.8	4959.25			8.8	7169.59			8.8	8040.18			8.8	4310.24			8.8	4367.01
8.9333	4963.52			8.9333	7138.19			8.9333	8068.63			8.9333	4311.03			8.9333	4381.86
9.0667	4999.57			9.0667	7148.65			9.0667	8136.41			9.0667	4311.77			9.0667	4396.87
9.2	4955.3			9.2	7098.05			9.2	8108.02			9.2	4295.84			9.2	4390.06
9.3333	4990.61			9.3333	7133.69			9.3333	8083.74			9.3333	4281.97			9.3333	4365.04
9.4667	4978.45			9.4667	7130.3			9.4667	8107.35			9.4667	4292.95			9.4667	4345.54
9.6	4998.98			9.6	7230.13			9.6	8164.86			9.6	4311.36			9.6	4317.69
9.7333	5026.18			9.7333	7219.47			9.7333	8119.5			9.7333	4317.43			9.7333	4310.45
9.8667	5028.53			9.8667	7198.31			9.8667	8114.48			9.8667	4360.99			9.8667	4300.87
10	5062.41			10	7227.35			10	8133.36			10	4396.44			10	4266.73
10.1333	5078.55			10.1333	7278.82			10.1333	8131.85			10.1333	4407.17			10.1333	4252.77
10.2667	5132.1			10.2667	7257.12			10.2667	8099.85			10.2667	4416.5			10.2667	4238.17
10.4	5109.15			10.4	7267.08			10.4	8039.43			10.4	4427.67			10.4	4238.73
10.5333	5113.69			10.5333	7239.98			10.5333	8017.24			10.5333	4402.64			10.5333	4235.79
10.6667	5103.99			10.6667	7269.09			10.6667	8039.77			10.6667	4398.68			10.6667	4247.6
10.8	5125.21			10.8	7296.9			10.8	8035.82			10.8	4369.71			10.8	4207.92
10.9333	5159.09			10.9333	7354.85			10.9333	8152.35			10.9333	4384.84			10.9333	4189.36
11.0667	5181.1			11.0667	7378.4			11.0667	8216.16			11.0667	4375.24			11.0667	4185.34
11.2	5209.57			11.2	7423.08			11.2	8368.07			11.2	4411.93			11.2	4161.34
11.3333	5282.14			11.3333	7440.75			11.3333	8435.76			11.3333	4423.47			11.3333	4172.74
11.4667	5307.89			11.4667	7498.55			11.4667	8489.34			11.4667	4448.61			11.4667	4179.85
11.6	5410.19			11.6	7536.15			11.6	8544.94			11.6	4438.6			11.6	4179.89
11.7333	5418.71			11.7333	7667.16			11.7333	8522.59			11.7333	4426.52			11.7333	4178.07
11.8667	5458.16			11.8667	7675.69			11.8667	8551.32			11.8667	4393.58			11.8667	4181.36
12	5486.53			12	7718.01			12	8673.29			12	4393.18			12	4186.9
12.1333	5515.57			12.1333	7897.82			12.1333	8794.4			12.1333	4379.72			12.1333	4170.72
12.2667	5558.9			12.2667	8054.71			12.2667	8958.3			12.2667	4358.04			12.2667	4162.47
12.4	5572.17			12.4	8300.19			12.4	9047.91			12.4	4339.39			12.4	4175.1
12.5333	5606.27			12.5333	8346.72			12.5333	9156.56			12.5333	4336.55			12.5333	4155.98
12.6667	5583.33			12.6667	8338.31			12.6667	9313.12			12.6667	4328.06			12.6667	4151.93
12.8	5635.08			12.8	8293.66			12.8	9393.18			12.8	4326.94			12.8	4171.99
12.9333	5698.32			12.9333	8312.75			12.9333	9496.57			12.9333	4348.19			12.9333	4178.78
13.0667	5712.61			13.0667	8315.72			13.0667	9584.27			13.0667	4352.42			13.0667	4183.54
13.2	5734.35			13.2	8330.85			13.2	9690.78			13.2	4376.19			13.2	4202.81
13.3333	5700.73			13.3333	8336.63			13.3333	9705.31			13.3333	4378.53			13.3333	4207.57
13.4667	5709.19			13.4667	8449.39			13.4667	9802.74			13.4667	4400.14			13.4667	4240.97
13.6	5748.69			13.6	8508.22			13.6	9960.68			13.6	4436.42			13.6	4245.17
13.7333	5731.05			13.7333	8627.61			13.7333	10061.3			13.7333	4462.59			13.7333	4254.3
13.8667	5765.22			13.8667	8772.97			13.8667	10222			13.8667	4465.06			13.8667	4240.86
14	5800.93			14	8944.61			14	10234.7			14	4462.04			14	4257.57
14.1333	5838.61			14.1333	9121.91			14.1333	10300.8			14.1333	4444.31			14.1333	4241.88
14.2667	5936.19			14.2667	9132.95			14.2667	10332.4			14.2667	4439.96			14.2667	4275.64
14.4	5966.66			14.4	9101.58			14.4	10366.7			14.4	4458.45			14.4	4270.79
14.5333	6061.84			14.5333	8903.19			14.5333	10373.4			14.5333	4456.18			14.5333	4280.86
14.6667	6192.84			14.6667	8865.02			14.6667	10385.4			14.6667	4493.31			14.6667	4297.65
14.8	6419.57			14.8	8830.12			14.8	10470.6			14.8	4479.74			14.8	4319.98
14.9333	6598.34			14.9333	8822.49			14.9333	10590.7			14.9333	4469.73			14.9333	4307.81
15.0667	6784.95			15.0667	8834.28			15.0667	10671.9			15.0667	4463.62			15.0667	4326.29
15.2	6973.67			15.2	8913.47			15.2	10648.1			15.2	4490.38			15.2	4304.44
15.3333	7122.69			15.3333	9027.83			15.3333	10709.2			15.3333	4491.07			15.3333	4343.41
15.4667	7189.26			15.4667	9088.92			15.4667	10624.4			15.4667	4536.85			15.4667	4356.25
15.6	7241.76			15.6	9305.57			15.6	10521.2			15.6	4579.86			15.6	4411.13
15.7333	7210.07			15.7333	9386.5			15.7333	10555.8			15.7333	4655.52			15.7333	4451.31
15.8667	7147.92			15.8667	9461.75			15.8667	10487.2			15.8667	4736.6			15.8667	4459.4
16	7162.77			16	9591.81			16	10421.1			16	4796.88			16	4513.89
16.1333	7126.34			16.1333	9628.24			16.1333	10360.5			16.1333	4921.05			16.1333	4537.15
16.2667	7212.42			16.2667	9791.2			16.2667	10396.7			16.2667	5000.27			16.2667	4520.95
16.4	7237.22			16.4	9904.99			16.4	10308.9			16.4	5072.06			16.4	4520.19
16.5333	7374.14			16.5333	10060.9			16.5333	10283.4			16.5333	5097.16			16.5333	4496.36
16.6667	7502			16.6667	10219.6			16.6667	10302.4			16.6667	5148.2			16.6667	4489.42
16.8	7594.21			16.8	10415.9			16.8	10270.6			16.8	5141.04			16.8	4461.58
16.9333	7728.4			16.9333	10607.5			16.9333	10179			16.9333	5187.06			16.9333	4462.67
17.0667	7881.78			17.0667	10767.8			17.0667	10021.6			17.0667	5155.26			17.0667	4480.24
17.2	8075.08			17.2	10961.9			17.2	9846.51			17.2	5216.26			17.2	4513.19
17.3333	8300.88			17.3333	11111.4			17.3333	9691.21			17.3333	5271.33			17.3333	4526.82
17.4667	8404.26			17.4667	11249.8			17.4667	9542.6			17.4667	5369.87			17.4667	4544.21
17.6	8479.45			17.6	11326.7			17.6	9540.03			17.6	5389.83			17.6	4548.84
17.7333	8628.91			17.7333	11449.1			17.7333	9677.34			17.7333	5429.64			17.7333	4525.52
17.8667	8690.74			17.8667	11539.5			17.8667	9689.81			17.8667	5390.48			17.8667	4527.1
18	8791.13			18	11687.8			18	9864.49			18	5394.96			18	4533.69
18.1333	8999.95			18.1333	11831.8			18.1333	9852.58			18.1333	5432.85			18.1333	4538.23
18.2667	9419.93			18.2667	11790.5			18.2667	9844.22			18.2667	5458.85			18.2667	4546.57
18.4	9811.14			18.4	12014.6			18.4	9807.9			18.4	5468.47			18.4	4586.31
18.5333	9973.32			18.5333	12241.3			18.5333	9793.64			18.5333	5437.97			18.5333	4631.45
18.6667	9974.8			18.6667	12570			18.6667	9746.23			18.6667	5385.91			18.6667	4639.19
18.8	9803.67			18.8	12682.2			18.8	9744.02			18.8	5360.65			18.8	4649.05
18.9333	9692.5			18.9333	12778.4			18.9333	9765.1			18.9333	5304.15			18.9333	4650.29
19.0667	9750.99			19.0667	12738.5			19.0667	9849.48			19.0667	5267.5			19.0667	4676.1
19.2	9799.06			19.2	12716.4			19.2	9757.51			19.2	5262.1			19.2	4675.11
19.3333	9842.32			19.3333	12596.3			19.3333	9745.55			19.3333	5225.82			19.3333	4736.34
19.4667	9808.34			19.4667	12488.3			19.4667	9793.91			19.4667	5271.98			19.4667	4745.77
19.6	9734.15			19.6	12388.9			19.6	9758.34			19.6	5364.51			19.6	4748.96
19.7333	9711			19.7333	12284.9			19.7333	9734.99			19.7333	5514.39			19.7333	4763.71
19.8667	9708.52			19.8667	12190.5			19.8667	9774.1			19.8667	5649.31			19.8667	4777.17
20	9574.28			20	12071.5			20	9794.84			20	5696.52			20	4784.81
20.1333	9553.89			20.1333	11935.1			20.1333	9861.13			20.1333	5752.17			20.1333	4840.77
20.2667	9534.24			20.2667	11759.6			20.2667	9880.58			20.2667	5755.5			20.2667	4881.61
20.4	9531.25			20.4	11501.6			20.4	9892.87			20.4	5759.97			20.4	4965.76
20.5333	9637.05			20.5333	11276.8			20.5333	9928.08			20.5333	5773.68			20.5333	5041.31
20.6667	9608.47			20.6667	11000.7			20.6667	9975.42			20.6667	5797.02			20.6667	5208.07
20.8	9594.91			20.8	10836.2			20.8	9952.3			20.8	5793.55			20.8	5291.28
20.9333	9569.73			20.9333	10634.1			20.9333	9932.57			20.9333	5783.43			20.9333	5280.03
21.0667	9570.27			21.0667	10512.6			21.0667	9994.94			21.0667	5805.69			21.0667	5333.09
21.2	9547.23			21.2	10414.4			21.2	10054.6			21.2	5765.22			21.2	5327.89
21.3333	9599.25			21.3333	10324.8			21.3333	10110.4			21.3333	5769.07			21.3333	5328.35
21.4667	9636.49			21.4667	10228.4			21.4667	10192.4			21.4667	5775.26			21.4667	5296.91
21.6	9673.5			21.6	10103.3			21.6	10234.4			21.6	5815.08			21.6	5336.9
21.7333	9715.47			21.7333	10070.9			21.7333	10349.1			21.7333	5940.97			21.7333	5342.62
21.8667	9684.19			21.8667	9923.66			21.8667	10449.5			21.8667	6016.34			21.8667	5358.65
22	9774.98			22	9860.95			22	10631.6			22	6092.1			22	5379.74
22.1333	9782.31			22.1333	9820.23			22.1333	10748.7			22.1333	6164.02			22.1333	5405.93
22.2667	9843.72			22.2667	9840.01			22.2667	10961.4			22.2667	6171.09			22.2667	5456.23
22.4	9863.16			22.4	9799.96			22.4	11047.4			22.4	6194.31			22.4	5486.67
22.5333	9884.81			22.5333	9796.42			22.5333	11136.2			22.5333	6228.36			22.5333	5529.25
22.6667	9966.07			22.6667	9786			22.6667	11267.8			22.6667	6188.2			22.6667	5545.72
22.8	10097.1			22.8	9767.27			22.8	11252.6			22.8	6235.66			22.8	5586.86
22.9333	10213			22.9333	9730.88			22.9333	11110.4			22.9333	6186.61			22.9333	5633.2
23.0667	10343.7			23.0667	9835.58			23.0667	11067.9			23.0667	6148.07			23.0667	5620.99
23.2	10485.1			23.2	9835.56			23.2	11069.6			23.2	6043.25			23.2	5654.89
23.3333	10700.6			23.3333	9826.44			23.3333	11035.7			23.3333	5997.43			23.3333	5644.49
23.4667	10929.9			23.4667	9814.13			23.4667	11045.7			23.4667	5977.48			23.4667	5683.9
23.6	11054.9			23.6	9924.77			23.6	11093.7			23.6	6058.52			23.6	5750.55
23.7333	11165.3			23.7333	10041.2			23.7333	11245.8			23.7333	6168.18			23.7333	5811.08
23.8667	11231.5			23.8667	10268.1			23.8667	11282.3			23.8667	6335.54			23.8667	5918.52
24	11204.4			24	10404.9			24	11375.8			24	6569.17			24	5997.17
24.1333	11198			24.1333	10535			24.1333	11494.4			24.1333	6975.19			24.1333	6061.1
24.2667	11239			24.2667	10619			24.2667	11581.5			24.2667	7669.09			24.2667	6074.03
24.4	11334.3			24.4	10775			24.4	11737.4			24.4	8502.93			24.4	6123.9
24.5333	11447.3			24.5333	10939.2			24.5333	11880.9			24.5333	9388.28			24.5333	6144.95
24.6667	11575.3			24.6667	11169			24.6667	11952.1			24.6667	10123			24.6667	6223.92
24.8	11598.6			24.8	11312.4			24.8	12016.7			24.8	10453.9			24.8	6263.73
24.9333	11672.6			24.9333	11421.5			24.9333	12170.9			24.9333	10468.1			24.9333	6310.06
25.0667	11772.3			25.0667	11499.7			25.0667	12313.7			25.0667	10510.7			25.0667	6334.03
25.2	11780.6			25.2	11390.8			25.2	12347.2			25.2	10632.5			25.2	6375.44
25.3333	11792.9			25.3333	11363.9			25.3333	12250.2			25.3333	10779.5			25.3333	6421.34
25.4667	12094.1			25.4667	11422.2			25.4667	12312.5			25.4667	11004.9			25.4667	6568.99
25.6	12258.9			25.6	11424.4			25.6	12177.2			25.6	11046.3			25.6	6663.74
25.7333	12313.1			25.7333	11574.6			25.7333	12160.4			25.7333	10907.6			25.7333	6753.56
25.8667	12587.5			25.8667	11720			25.8667	12035.8			25.8667	10642			25.8667	6954.73
26	12597.8			26	11897.7			26	12125.7			26	10290.3			26	7242.57
26.1333	12748.9			26.1333	12047			26.1333	12163.7			26.1333	9969.41			26.1333	7629.27
26.2667	12889.6			26.2667	12345.9			26.2667	12307.2			26.2667	9655.39			26.2667	8181.68
26.4	12892.3			26.4	12632.6			26.4	12462.8			26.4	9389.98			26.4	8960.5
26.5333	13023.1			26.5333	12965.1			26.5333	12747.2			26.5333	9140.54			26.5333	9710.36
26.6667	13060.2			26.6667	13163.1			26.6667	13070			26.6667	8905.63			26.6667	10469.1
26.8	13070.5			26.8	13196.3			26.8	13352.6			26.8	8808.82			26.8	10939.2
26.9333	13069.7			26.9333	13262.1			26.9333	13516.6			26.9333	8958.81			26.9333	11279.1
27.0667	13186.2			27.0667	13433			27.0667	13881.7			27.0667	9056.05			27.0667	11550.7
27.2	13261.9			27.2	13683.4			27.2	14383.1			27.2	9139.56			27.2	11830.5
27.3333	13249.5			27.3333	13988			27.3333	14714			27.3333	9225.95			27.3333	12014.5
27.4667	13364.6			27.4667	14259.8			27.4667	15291.1			27.4667	9363.29			27.4667	12163.4
27.6	13349.3			27.6	14658.2			27.6	15894.5			27.6	9418.95			27.6	12363.4
27.7333	13551.6			27.7333	15079.6			27.7333	16432.8			27.7333	9667.93			27.7333	12500
27.8667	13582			27.8667	15421.2			27.8667	16824.2			27.8667	9995.35			27.8667	12677
28	13681.8			28	15773.7			28	16864.7			28	10477.4			28	12845.1
28.1333	13695.8			28.1333	16140.8			28.1333	16811.4			28.1333	10898.6			28.1333	13062
28.2667	13707.2			28.2667	16613.3			28.2667	16586.7			28.2667	11304.7			28.2667	13232.7
28.4	13742.7			28.4	17047.5			28.4	16360			28.4	11718.5			28.4	13411.3
28.5333	13823.1			28.5333	17570.7			28.5333	16118.1			28.5333	12062.8			28.5333	13651.5
28.6667	13769.1			28.6667	17975.7			28.6667	15977.7			28.6667	12434.1			28.6667	13841.7
28.8	13806.4			28.8	18446.6			28.8	15913.3			28.8	12739.4			28.8	14143.1
28.9333	13774.8			28.9333	19105.8			28.9333	15928.8			28.9333	12973.4			28.9333	14423.1
29.0667	13743.2			29.0667	19581.4			29.0667	16136.2			29.0667	13100.2			29.0667	14740.2
29.2	13621.5			29.2	20179.3			29.2	16357.9			29.2	13325.6			29.2	15230.3
29.3333	13658.9			29.3333	20661.3			29.3333	16858			29.3333	13603.3			29.3333	15616.9
29.4667	13597.2			29.4667	21351.6			29.4667	17458.8			29.4667	13981.6			29.4667	16156.5
29.6	13639.8			29.6	22169.2			29.6	18610.4			29.6	14207			29.6	16636.5
29.7333	13632.8			29.7333	23313.3			29.7333	19695.5			29.7333	14626.7			29.7333	17330.6
29.8667	13664.1			29.8667	24910.2			29.8667	20956			29.8667	14916.8			29.8667	18064.6
30	13638.1			30	26694.4			30	22679.2			30	15320.6			30	19214.7
30.1333	13563.4			30.1333	28611.8			30.1333	24810			30.1333	15557.6			30.1333	20341
30.2667	13581.4			30.2667	29707.3			30.2667	27501.4			30.2667	15655.9			30.2667	21765.2
30.4	13645.5			30.4	30203.6			30.4	29861.3			30.4	15750.9			30.4	23306.1
30.5333	13799.9			30.5333	29871.1			30.5333	31264.6			30.5333	15622.7			30.5333	25012.6
30.6667	13830.3			30.6667	29376.1			30.6667	31892.3			30.6667	15270.8			30.6667	26424.8
30.8	13744.8			30.8	28385.2			30.8	31572.8			30.8	14706.7			30.8	27557
30.9333	13891.5			30.9333	27370.8			30.9333	30414.7			30.9333	13933.8			30.9333	28714.8
31.0667	14043.1			31.0667	26154.7			31.0667	28919.5			31.0667	13221.5			31.0667	29797.9
31.2	14155.7			31.2	25206.5			31.2	27077.4			31.2	12293.6			31.2	31062.1
31.3333	14357.6			31.3333	24422.2			31.3333	25624.7			31.3333	11417.4			31.3333	31671.3
31.4667	14518.6			31.4667	23914.6			31.4667	24769.6			31.4667	10651.7			31.4667	31911
31.6	14746.2			31.6	23704.7			31.6	24089.9			31.6	9938.27			31.6	31710.5
31.7333	14916.8			31.7333	23961.7			31.7333	23520.1			31.7333	9359.22			31.7333	31257.3
31.8667	15081			31.8667	24002.3			31.8667	22940.5			31.8667	8850.77			31.8667	30819.4
32	15201			32	23682.6			32	22786.5			32	8412.82			32	30177.5
32.1333	15114.4			32.1333	23264.9			32.1333	22740.2			32.1333	8049.94			32.1333	29626.4
32.2667	15120			32.2667	22809.7			32.2667	22792.3			32.2667	7817.89			32.2667	28998.9
32.4	15145.7			32.4	22563.1			32.4	22810.8			32.4	7566.69			32.4	28851
32.5333	15121.8			32.5333	22778.2			32.5333	22717.3			32.5333	7412.17			32.5333	28869
32.6667	15252.3			32.6667	22852.1			32.6667	22687.8			32.6667	7281.57			32.6667	29166.9
32.8	15456.8			32.8	22908.4			32.8	22858.7			32.8	7200.6			32.8	29599.3
32.9333	15814.5			32.9333	23080.9			32.9333	23071.5			32.9333	7177.93			32.9333	29989.2
33.0667	16152.9			33.0667	23166			33.0667	23416.9			33.0667	7070.25			33.0667	30306.8
33.2	16467.6			33.2	23409			33.2	23552.1			33.2	7085.31			33.2	30898.8
33.3333	16692.6			33.3333	23614.8			33.3333	23778.7			33.3333	7134.44			33.3333	31455.3
33.4667	17003.7			33.4667	23651.8			33.4667	23583.4			33.4667	7183.74			33.4667	31998.2
33.6	17275.3			33.6	23724			33.6	23529.2			33.6	7224.64			33.6	32279.7
33.7333	17541.7			33.7333	23778.1			33.7333	23372.9			33.7333	7180.03			33.7333	32401
33.8667	17924.5			33.8667	23700.8			33.8667	23356.1			33.8667	7220.35			33.8667	32418.4
34	18344.6			34	23839.9			34	23218.4			34	7174.95			34	32268.5
34.1333	18711.9			34.1333	24016.3			34.1333	23139.6			34.1333	7190.65			34.1333	32258.3
34.2667	19106.1			34.2667	24446.6			34.2667	22892.4			34.2667	7166.87			34.2667	31913.9
34.4	19654.1			34.4	24986			34.4	22664.2			34.4	7113.01			34.4	31507.6
34.5333	20438.4			34.5333	25506.2			34.5333	22584			34.5333	7035.98			34.5333	31096.9
34.6667	21203.2			34.6667	25985.4			34.6667	22653.6			34.6667	6972.38			34.6667	30719.2
34.8	21980.4			34.8	26396.3			34.8	22910.6			34.8	6924.06			34.8	30469.3
34.9333	22617.9			34.9333	26575.4			34.9333	23184.5			34.9333	6886.75			34.9333	30383.5
35.0667	23158.2			35.0667	26562.1			35.0667	23635.4			35.0667	6857.73			35.0667	30555.2
35.2	23730.8			35.2	26419.7			35.2	24075.5			35.2	6823.6			35.2	30715.3
35.3333	24352.9			35.3333	26165.2			35.3333	24576.9			35.3333	6797.87			35.3333	30679.3
35.4667	24837.9			35.4667	26067.6			35.4667	25206.1			35.4667	6789.08			35.4667	30610.8
35.6	24729			35.6	25811.2			35.6	25976.9			35.6	6770.42			35.6	30548.3
35.7333	24376			35.7333	25765.4			35.7333	27024.2			35.7333	6684.38			35.7333	30314.7
35.8667	23831.5			35.8667	25754.2			35.8667	28168.5			35.8667	6649.22			35.8667	29861
36	23329.5			36	25998			36	29206.8			36	6609.25			36	29489.1
36.1333	22770.9			36.1333	26275.1			36.1333	29759.3			36.1333	6611.53			36.1333	28830.2
36.2667	22376.2			36.2667	26726.9			36.2667	30300.2			36.2667	6625			36.2667	28457.4
36.4	21933.8			36.4	27334.4			36.4	30581.6			36.4	6685.18			36.4	28055.5
36.5333	21493			36.5333	28187.9			36.5333	30858.9			36.5333	6718.22			36.5333	27526.2
36.6667	20950.6			36.6667	29523.1			36.6667	30824.3			36.6667	6644.32			36.6667	27010.1
36.8	20342.7			36.8	31335.9			36.8	30746.6			36.8	6600.58			36.8	26421
36.9333	20090.1			36.9333	32827.5			36.9333	31107.2			36.9333	6527.73			36.9333	25911.4
37.0667	19896.6			37.0667	33540.7			37.0667	31485.1			37.0667	6433.55			37.0667	25117.5
37.2	19640.3			37.2	32988.4			37.2	31962			37.2	6430.02			37.2	24725.1
37.3333	19227.1			37.3333	31023			37.3333	31854.8			37.3333	6406.93			37.3333	24412.2
37.4667	18865.6			37.4667	28036.8			37.4667	31468.7			37.4667	6454.44			37.4667	24299.4
37.6	18447.6			37.6	24907.6			37.6	30722.9			37.6	6414.35			37.6	23896.3
37.7333	18210			37.7333	22411.3			37.7333	30135.2			37.7333	6381.52			37.7333	23550.3
37.8667	17850.3			37.8667	20327			37.8667	29629.8			37.8667	6424.08			37.8667	23215.1
38	17723.7			38	18907.2			38	29168			38	6336.98			38	22985.9
38.1333	17637.1			38.1333	18062			38.1333	28491.1			38.1333	6361.92			38.1333	22514.8
38.2667	17531.8			38.2667	17557.1			38.2667	27502			38.2667	6321.19			38.2667	22212.3
38.4	17370.3			38.4	17238.1			38.4	26310.8			38.4	6303.38			38.4	21748
38.5333	17143.3			38.5333	16646.7			38.5333	25357.6			38.5333	6292.29			38.5333	21133.4
38.6667	17072.2			38.6667	16011.4			38.6667	24485.4			38.6667	6277.8			38.6667	20452.9
38.8	16941.9			38.8	15256.4			38.8	23767			38.8	6272.74			38.8	19708.4
38.9333	17068.1			38.9333	14419.5			38.9333	23222.5			38.9333	6199.66			38.9333	19143.4
39.0667	17317.1			39.0667	13473.5			39.0667	22435.8			39.0667	6125.32			39.0667	18508.9
39.2	17765.2			39.2	12846			39.2	22036.5			39.2	6070.56			39.2	17892.4
39.3333	18221.7			39.3333	12337.3			39.3333	21978.6			39.3333	6056.26			39.3333	17469.5
39.4667	18739.9			39.4667	11942.8			39.4667	21878.9			39.4667	5954.14			39.4667	16891.6
39.6	19364.7			39.6	11710.7			39.6	21737.4			39.6	5990.36			39.6	16426.6
39.7333	19929.2			39.7333	11541.6			39.7333	21676.1			39.7333	5935.98			39.7333	16130.4
39.8667	20208.3			39.8667	11308.8			39.8667	21701			39.8667	5970.73			39.8667	15865.1
40	20080.8			40	11016			40	21980.9			40	5984.03			40	15648.1
40.1333	20005.2			40.1333	10838.9			40.1333	22139.3			40.1333	5934.43			40.1333	15214
40.2667	19959.3			40.2667	10594.5			40.2667	22535			40.2667	5933.02			40.2667	14798.1
40.4	20338.3			40.4	10570.1			40.4	23328.3			40.4	5947.44			40.4	14373.4
40.5333	20710.4			40.5333	10538.2			40.5333	23942.1			40.5333	5931.24			40.5333	13827.5
40.6667	21141.1			40.6667	10488.7			40.6667	24473			40.6667	5986.45			40.6667	13256.1
40.8	21350.1			40.8	10433.7			40.8	24558.7			40.8	5951.3			40.8	12925.2
40.9333	21257			40.9333	10406.4			40.9333	24607.7			40.9333	5915.02			40.9333	12578.4
41.0667	20987.9			41.0667	10399			41.0667	24533.9			41.0667	5947.78			41.0667	12363.8
41.2	20596.9			41.2	10268.8			41.2	24104			41.2	5885.77			41.2	12127.7
41.3333	20164.5			41.3333	10242.7			41.3333	23727.9			41.3333	5886.22			41.3333	11968.4
41.4667	19739.6			41.4667	10167			41.4667	23041.4			41.4667	5843.16			41.4667	11700.1
41.6	19393.9			41.6	10085.7			41.6	22338.8			41.6	5831.7			41.6	11439.7
41.7333	19535.1			41.7333	10051.3			41.7333	21717.1			41.7333	5805.55			41.7333	11245.4
41.8667	19903			41.8667	9912.13			41.8667	21353.3			41.8667	5844.36			41.8667	11227.9
42	20297.4			42	9869.18			42	20670.1			42	5850.98			42	11066.8
42.1333	20830.9			42.1333	9853.06			42.1333	20152.3			42.1333	5823.49			42.1333	11013.8
42.2667	21512.9			42.2667	9925.56			42.2667	19743.8			42.2667	5717.37			42.2667	10821.9
42.4	22618.4			42.4	9924.55			42.4	19486.9			42.4	5675.13			42.4	10619
42.5333	24071.6			42.5333	9816.64			42.5333	19268.2			42.5333	5712.5			42.5333	10585.7
42.6667	26203.5			42.6667	9681.99			42.6667	19040.9			42.6667	5735.32			42.6667	10459.3
42.8	28264.5			42.8	9468.06			42.8	18879.5			42.8	5727.9			42.8	10340.9
42.9333	29690.6			42.9333	9248.36			42.9333	18722.6			42.9333	5719.82			42.9333	10286.4
43.0667	30620.6			43.0667	9059.6			43.0667	18736			43.0667	5717.9			43.0667	10201.6
43.2	31085.6			43.2	8813.15			43.2	18549.5			43.2	5732.81			43.2	10123.4
43.3333	31459.2			43.3333	8620.78			43.3333	18635.4			43.3333	5791.23			43.3333	10006.8
43.4667	31255.8			43.4667	8474.44			43.4667	18660.2			43.4667	5805.02			43.4667	9871.72
43.6	30728.5			43.6	8286.45			43.6	18462.6			43.6	5859.64			43.6	9819.56
43.7333	29379.6			43.7333	8300.82			43.7333	18115.3			43.7333	5884.92			43.7333	9839.43
43.8667	27408.4			43.8667	8216.58			43.8667	17785.7			43.8667	5825.08			43.8667	9844.11
44	25138.7			44	8169.79			44	17544.2			44	5858.43			44	9817.07
44.1333	23111.2			44.1333	8061.46			44.1333	17384.3			44.1333	5802.84			44.1333	9766.16
44.2667	21028.2			44.2667	7973.4			44.2667	17280.5			44.2667	5746.88			44.2667	9677.24
44.4	18925.3			44.4	7877.62			44.4	17143.3			44.4	5727.32			44.4	9683.33
44.5333	16659.8			44.5333	7836.78			44.5333	17003.1			44.5333	5713.32			44.5333	9752.2
44.6667	14856.2			44.6667	7821.6			44.6667	17013.9			44.6667	5706.22			44.6667	9677.7
44.8	13600.1			44.8	7767.68			44.8	16939.6			44.8	5742.23			44.8	9612.2
44.9333	12663.7			44.9333	7720.92			44.9333	17119.9			44.9333	5788.99			44.9333	9605.53
45.0667	11976.9			45.0667	7649.19			45.0667	17302.3			45.0667	5784.62			45.0667	9494.68
45.2	11341.1			45.2	7631.58			45.2	17480			45.2	5795.75			45.2	9526.29
45.3333	11037.2			45.3333	7579.77			45.3333	17476.6			45.3333	5842.99			45.3333	9537.77
45.4667	10762			45.4667	7569.88			45.4667	17653.5			45.4667	5842.19			45.4667	9506.87
45.6	10506.9			45.6	7551.23			45.6	17686.5			45.6	5803.78			45.6	9552.97
45.7333	10338.6			45.7333	7601.78			45.7333	17473.5			45.7333	5794.89			45.7333	9490.9
45.8667	10237.4			45.8667	7617.83			45.8667	17069			45.8667	5830.67			45.8667	9460.26
46	10172.2			46	7651.15			46	16762.4			46	5820.56			46	9466.65
46.1333	10093.2			46.1333	7586.53			46.1333	16301.5			46.1333	5825.63			46.1333	9445.39
46.2667	10127.2			46.2667	7511.71			46.2667	15868.3			46.2667	5817.13			46.2667	9463.11
46.4	10086.5			46.4	7455.64			46.4	15424.4			46.4	5743.98			46.4	9472.69
46.5333	10013.4			46.5333	7492.58			46.5333	14789.6			46.5333	5664.84			46.5333	9481.7
46.6667	9898.92			46.6667	7528.67			46.6667	14137.2			46.6667	5625.03			46.6667	9467.04
46.8	9886.66			46.8	7452.25			46.8	13551.4			46.8	5629.41			46.8	9532.84
46.9333	9852.57			46.9333	7490.13			46.9333	12946.2			46.9333	5596.71			46.9333	9590.85
47.0667	9830.56			47.0667	7518.67			47.0667	12583.2			47.0667	5593.97			47.0667	9577.47
47.2	9805.03			47.2	7527.65			47.2	12233.7			47.2	5574.7			47.2	9492.1
47.3333	9801.72			47.3333	7557.25			47.3333	11909.4			47.3333	5567.92			47.3333	9505.25
47.4667	9695.9			47.4667	7601.93			47.4667	11246.2			47.4667	5571.62			47.4667	9412.47
47.6	9601.48			47.6	7603.84			47.6	10732.6			47.6	5568.71			47.6	9353.63
47.7333	9569.91			47.7333	7610.4			47.7333	10336.3			47.7333	5532.41			47.7333	9374.41
47.8667	9521.08			47.8667	7620.97			47.8667	10007.2			47.8667	5579.99			47.8667	9460.07
48	9450.98			48	7463.25			48	9772.75			48	5588.91			48	9472.01
48.1333	9379.32			48.1333	7385.55			48.1333	9536.96			48.1333	5594.47			48.1333	9493.93
48.2667	9391.93			48.2667	7349.5			48.2667	9324.94			48.2667	5582.82			48.2667	9359.76
48.4	9336.04			48.4	7336.23			48.4	9286.05			48.4	5575.61			48.4	9148.26
48.5333	9268.41			48.5333	7352.39			48.5333	9284.94			48.5333	5601.59			48.5333	9033.57
48.6667	9267.12			48.6667	7358.44			48.6667	9226.05			48.6667	5646.14			48.6667	8944.33
48.8	9191.36			48.8	7388.64			48.8	9251.96			48.8	5610.6			48.8	8812.36
48.9333	9105.39			48.9333	7438.99			48.9333	9319.64			48.9333	5632.9			48.9333	8731.35
49.0667	9083.05			49.0667	7386.88			49.0667	9297.89			49.0667	5634.92			49.0667	8636.6
49.2	9079.44			49.2	7410.59			49.2	9309.4			49.2	5635.2			49.2	8604.23
49.3333	8998.58			49.3333	7346.06			49.3333	9320.85			49.3333	5607.65			49.3333	8615.28
49.4667	9051.14			49.4667	7240.84			49.4667	9229.07			49.4667	5583.89			49.4667	8615.44
49.6	9015.78			49.6	7195.73			49.6	9144.9			49.6	5603.98			49.6	8611.1
49.7333	8920.1			49.7333	6993.42			49.7333	9079.54			49.7333	5604.73			49.7333	8607.18
49.8667	8863.49			49.8667	6790.4			49.8667	9048.58			49.8667	5589.27			49.8667	8589.93
50	8859.21			50	6652.02			50	8918.02			50	5548.58			50	8613.42
50.1333	8853.77			50.1333	6495.66			50.1333	8815.81			50.1333	5582.92			50.1333	8647.1
50.2667	8844.83			50.2667	6415.4			50.2667	8768.38			50.2667	5561.05			50.2667	8728.1
50.4	8910.09			50.4	6305.2			50.4	8672.85			50.4	5511.71			50.4	8802.19
50.5333	8961.96			50.5333	6149.99			50.5333	8670.02			50.5333	5488.8			50.5333	8946.81
50.6667	8991.53			50.6667	6005.44			50.6667	8667.36			50.6667	5447.94			50.6667	8939.46
50.8	9005.13			50.8	5894.46			50.8	8605.96			50.8	5406.91			50.8	9055.48
50.9333	9036.16			50.9333	5810.34			50.9333	8544.31			50.9333	5417.33			50.9333	9055
51.0667	8998.88			51.0667	5692.3			51.0667	8451.07			51.0667	5419.07			51.0667	9104.08
51.2	8976.2			51.2	5597.41			51.2	8352.58			51.2	5475.08			51.2	9243.11
51.3333	8959.94			51.3333	5508.57			51.3333	8281.2			51.3333	5477.22			51.3333	9386.28
51.4667	8850.2			51.4667	5425.17			51.4667	8243.02			51.4667	5481.39			51.4667	9621.65
51.6	8773.77			51.6	5374.24			51.6	8187.72			51.6	5497.45			51.6	9747.2
51.7333	8750.58			51.7333	5276.71			51.7333	8217.23			51.7333	5491.42			51.7333	9776.63
51.8667	8680.38			51.8667	5245.08			51.8667	8167.77			51.8667	5506.33			51.8667	9718.14
52	8693.99			52	5194.96			52	8156.6			52	5505.02			52	9520.6
52.1333	8611.2			52.1333	5152.82			52.1333	8112.94			52.1333	5515.81			52.1333	9010.53
52.2667	8653.01			52.2667	5114.84			52.2667	8062.23			52.2667	5492.14			52.2667	8275.73
52.4	8628.26			52.4	5085.15			52.4	8067.54			52.4	5446.05			52.4	7666.12
52.5333	8645.25			52.5333	5046.98			52.5333	8064.16			52.5333	5414.51			52.5333	7249.91
52.6667	8671.64			52.6667	5019.67			52.6667	7943.18			52.6667	5378.08			52.6667	7011.56
52.8	8590.07			52.8	5013.61			52.8	7929.05			52.8	5402.12			52.8	6783.74
52.9333	8653.79			52.9333	4973.38			52.9333	7874.36			52.9333	5385.72			52.9333	6651.04
53.0667	8612.92			53.0667	4922.7			53.0667	7876.01			53.0667	5364.2			53.0667	6435.15
53.2	8605.15			53.2	4866.81			53.2	7860.32			53.2	5350.77			53.2	6225.95
53.3333	8570.34			53.3333	4854.6			53.3333	7801.85			53.3333	5348.09			53.3333	6040.7
53.4667	8550.56			53.4667	4797.23			53.4667	7849.08			53.4667	5338.24			53.4667	5896.27
53.6	8596.56			53.6	4820.69			53.6	7842.62			53.6	5317.74			53.6	5845.89
53.7333	8672.82			53.7333	4783.28			53.7333	7851.71			53.7333	5260.99			53.7333	5761.74
53.8667	8649.8			53.8667	4771.52			53.8667	7860.97			53.8667	5193.57			53.8667	5741.58
54	8590.03			54	4780.38			54	7784.25			54	5171.88			54	5724.22
54.1333	8628.07			54.1333	4744.11			54.1333	7693.36			54.1333	5113.86			54.1333	5687.52
54.2667	8610.74			54.2667	4716.81			54.2667	7592.68			54.2667	5087.82			54.2667	5621.22
54.4	8586.87			54.4	4716.37			54.4	7513.94			54.4	5100.09			54.4	5572.78
54.5333	8583.88			54.5333	4699.37			54.5333	7490.87			54.5333	5106.55			54.5333	5498.57
54.6667	8492.44			54.6667	4721.76			54.6667	7435.77			54.6667	5094.18			54.6667	5490.59
54.8	8506.49			54.8	4741.24			54.8	7372.94			54.8	5109.54			54.8	5462.42
54.9333	8504.57			54.9333	4729			54.9333	7352.16			54.9333	5106.72			54.9333	5443
55.0667	8484.79			55.0667	4731.73			55.0667	7284.79			55.0667	5138.9			55.0667	5385.77
55.2	8500.81			55.2	4697.14			55.2	7281.8			55.2	5132.48			55.2	5339.06
55.3333	8512.03			55.3333	4663.56			55.3333	7208.85			55.3333	5146.84			55.3333	5248.88
55.4667	8667.08			55.4667	4632.51			55.4667	7230.24			55.4667	5133.14			55.4667	5243.02
55.6	8742.94			55.6	4629.24			55.6	7175.98			55.6	5120.09			55.6	5200.9
55.7333	8794.24			55.7333	4605.35			55.7333	7101.21			55.7333	5116.92			55.7333	5169.88
55.8667	8773.51			55.8667	4605.35			55.8667	7047.98			55.8667	5122.9			55.8667	5142.24
56	8702.79			56	4598.14			56	7073.12			56	5170.62			56	5130.27
56.1333	8674.74			56.1333	4611.91			56.1333	7004.59			56.1333	5142.89			56.1333	5107.25
56.2667	8711.49			56.2667	4640.74			56.2667	6992.05			56.2667	5141.51			56.2667	5082.39
56.4	8716.54			56.4	4643.34			56.4	6971.27			56.4	5161.19			56.4	5029.24
56.5333	8651.68			56.5333	4638.05			56.5333	6977.68			56.5333	5129.36			56.5333	4958.7
56.6667	8605.64			56.6667	4634.98			56.6667	6982.7			56.6667	5149.41			56.6667	4921.92
56.8	8677.8			56.8	4635.21			56.8	6943.21			56.8	5161.48			56.8	4865.17
56.9333	8677.5			56.9333	4623.54			56.9333	6936.76			56.9333	5168.98			56.9333	4814.23
57.0667	8738.02			57.0667	4611.65			57.0667	6960.79			57.0667	5200.35			57.0667	4784.39
57.2	8724.46			57.2	4579.15			57.2	6902			57.2	5241			57.2	4773.13
57.3333	8701.88			57.3333	4582.14			57.3333	6867.33			57.3333	5301.97			57.3333	4781.97
57.4667	8715.1			57.4667	4576.21			57.4667	6835.91			57.4667	5338.74			57.4667	4747.71
57.6	8704.35			57.6	4546.73			57.6	6821.68			57.6	5335.36			57.6	4713.09
57.7333	8677.74			57.7333	4542.07			57.7333	6743.53			57.7333	5367.46			57.7333	4664.45
57.8667	8760.18			57.8667	4554.06			57.8667	6729.85			57.8667	5373.56			57.8667	4620.59
58	8811.04			58	4514.26			58	6686.4			58	5417.45			58	4574.84
58.1333	8820			58.1333	4493.44			58.1333	6650.04			58.1333	5430.09			58.1333	4514.71
58.2667	8772.81			58.2667	4477.72			58.2667	6613.62			58.2667	5471.44			58.2667	4518.53
58.4	8787.67			58.4	4459.65			58.4	6578.13			58.4	5456.75			58.4	4542.77
58.5333	8812.45			58.5333	4420.39			58.5333	6568.24			58.5333	5464.12			58.5333	4527.24
58.6667	8806.49			58.6667	4418.98			58.6667	6549.72			58.6667	5390.23			58.6667	4481.56
58.8	8801.85			58.8	4375.12			58.8	6577.52			58.8	5386.69			58.8	4436.97
58.9333	8815.24			58.9333	4401.23			58.9333	6529.92			58.9333	5384.98			58.9333	4371.78
59.0667	8773.1			59.0667	4398.51			59.0667	6576.66			59.0667	5350.44			59.0667	4352.32
59.2	8774.56			59.2	4440.91			59.2	6551.17			59.2	5328.13			59.2	4322.8
59.3333	8816.92			59.3333	4455.96			59.3333	6562.57			59.3333	5312.77			59.3333	4295.06
59.4667	8809.45			59.4667	4495.32			59.4667	6554.06			59.4667	5314.87			59.4667	4258.81
59.6	8828.97			59.6	4507.09			59.6	6520.48			59.6	5350			59.6	4251.89
59.7333	8825.37			59.7333	4501.08			59.7333	6557.28			59.7333	5365.01			59.7333	4204.85
59.8667	8818.19			59.8667	4504.16			59.8667	6511.26			59.8667	5375.85			59.8667	4157.52
60	8886.1			60	4506.1			60	6478.03			60	5397.65			60	4147.53
60.1333	8895.04			60.1333	4494.73			60.1333	6391.91			60.1333	5390.78			60.1333	4142.17
60.2667	8889.46			60.2667	4499.59			60.2667	6391.02			60.2667	5352.64			60.2667	4116.71
60.4	8933.84			60.4	4510.95			60.4	6395.42			60.4	5331.14			60.4	4094.5
60.5333	8949.98			60.5333	4534.82			60.5333	6449.5			60.5333	5287.76			60.5333	4096.35
60.6667	8953.75			60.6667	4526.99			60.6667	6403.39			60.6667	5273.06			60.6667	4103.47
60.8	8992.31			60.8	4573.86			60.8	6435.14			60.8	5276.08			60.8	4106.62
60.9333	9057.27			60.9333	4575.31			60.9333	6359.27			60.9333	5279.29			60.9333	4060.24
61.0667	9101.14			61.0667	4598.44			61.0667	6361.69			61.0667	5275.96			61.0667	4031.98
61.2	9163.39			61.2	4629.18			61.2	6333.12			61.2	5297.06			61.2	4017.34
61.3333	9362.53			61.3333	4655.79			61.3333	6345.43			61.3333	5268.64			61.3333	4006.46
61.4667	9329.02			61.4667	4642.81			61.4667	6378.36			61.4667	5308.93			61.4667	3984.48
61.6	9341.15			61.6	4666.58			61.6	6364.96			61.6	5319.59			61.6	3966.24
61.7333	9400.32			61.7333	4644.24			61.7333	6294.34			61.7333	5375.78			61.7333	3973.22
61.8667	9384.83			61.8667	4648.25			61.8667	6219.6			61.8667	5357.37			61.8667	3967.66
62	9417.32			62	4649.77			62	6247.17			62	5376.64			62	3984.67
62.1333	9532.39			62.1333	4663.91			62.1333	6238.27			62.1333	5381.11			62.1333	3984.7
62.2667	9562.4			62.2667	4683.3			62.2667	6210.51			62.2667	5316.57			62.2667	3993.74
62.4	9521.19			62.4	4704.66			62.4	6150.57			62.4	5301.79			62.4	3991.11
62.5333	9529.15			62.5333	4720.08			62.5333	6148.9			62.5333	5331.12			62.5333	4018.31
62.6667	9552.15			62.6667	4673.27			62.6667	6088.07			62.6667	5329.34			62.6667	4011.2
62.8	9584.67			62.8	4708.58			62.8	6007.71			62.8	5417.33			62.8	3997.23
62.9333	9493.26			62.9333	4728.34			62.9333	5950.72			62.9333	5480.3			62.9333	3990.78
63.0667	9484.73			63.0667	4751.68			63.0667	5937.53			63.0667	5622.89			63.0667	3995.1
63.2	9430.07			63.2	4780.69			63.2	5900.99			63.2	5713.14			63.2	3994.66
63.3333	9346.61			63.3333	4815.43			63.3333	5914.97			63.3333	5795.65			63.3333	3978.11
63.4667	9290.24			63.4667	4818.62			63.4667	5946.73			63.4667	5857.41			63.4667	3979.91
63.6	9255.75			63.6	4903.49			63.6	5943.88			63.6	5835.35			63.6	4005.03
63.7333	9272.53			63.7333	4961.63			63.7333	5973.88			63.7333	5709.59			63.7333	3996.31
63.8667	9275.37			63.8667	4954.2			63.8667	5962.83			63.8667	5592.98			63.8667	4012.2
64	9293.1			64	4895.16			64	5897.95			64	5476.36			64	4020.27
64.1333	9293.19			64.1333	4843.57			64.1333	5915.82			64.1333	5423.48			64.1333	4031.2
64.2667	9322.65			64.2667	4822.14			64.2667	5931.42			64.2667	5398.94			64.2667	4042.83
64.4	9280.2			64.4	4796.8			64.4	5907.47			64.4	5340.49			64.4	4036.89
64.5333	9323.06			64.5333	4794.44			64.5333	5903.8			64.5333	5314.46			64.5333	4057.24
64.6667	9302.39			64.6667	4822.11			64.6667	5928.84			64.6667	5330.38			64.6667	4068.11
64.8	9299.33			64.8	4804.68			64.8	5859.09			64.8	5322.1			64.8	4062.44
64.9333	9379.21			64.9333	4826.35			64.9333	5878.37			64.9333	5299.17			64.9333	4090.4
65.0667	9378.67			65.0667	4816.65			65.0667	5839.45			65.0667	5258.08			65.0667	4074.25
65.2	9419.6			65.2	4852.87			65.2	5836.8			65.2	5238.1			65.2	4082.9
65.3333	9477.48			65.3333	4889.94			65.3333	5886.65			65.3333	5209.24			65.3333	4088.87
65.4667	9477.3			65.4667	4924.98			65.4667	5923.7			65.4667	5191.72			65.4667	4102.08
65.6	9437.12			65.6	4994.42			65.6	5972.61			65.6	5189.06			65.6	4082.23
65.7333	9447.12			65.7333	5130.83			65.7333	6043.52			65.7333	5175.81			65.7333	4087.11
65.8667	9380.19			65.8667	5312.87			65.8667	6159.64			65.8667	5193.77			65.8667	4112.6
66	9316.91			66	5505.21			66	6209.09			66	5185.9			66	4115.17
66.1333	9304.31			66.1333	5624.03			66.1333	6222.74			66.1333	5185.31			66.1333	4108.7
66.2667	9176.46			66.2667	5595.07			66.2667	6284.2			66.2667	5159.32			66.2667	4082.25
66.4	9239.68			66.4	5522.95			66.4	6371.14			66.4	5131.5			66.4	4065.93
66.5333	9209.5			66.5333	5385.45			66.5333	6499.59			66.5333	5147.13			66.5333	4055.37
66.6667	9184.88			66.6667	5268.97			66.6667	6532.83			66.6667	5125.34			66.6667	4045.61
66.8	9234.94			66.8	5158.79			66.8	6566.55			66.8	5086.85			66.8	4045.44
66.9333	9163.34			66.9333	5049.04			66.9333	6560.24			66.9333	5063.72			66.9333	4044.31
67.0667	9156.96			67.0667	4896.82			67.0667	6691.99			67.0667	5031.39			67.0667	4023.83
67.2	9192.7			67.2	4781.16			67.2	6807.05			67.2	4998.68			67.2	4028
67.3333	9162.73			67.3333	4656.82			67.3333	6891.6			67.3333	4935.08			67.3333	3998.94
67.4667	9126.36			67.4667	4551.54			67.4667	6932.57			67.4667	4917.02			67.4667	3993.51
67.6	9114.59			67.6	4504.12			67.6	6802.89			67.6	4900.15			67.6	4002.63
67.7333	9107.67			67.7333	4454.66			67.7333	6594.45			67.7333	4897.91			67.7333	3979.49
67.8667	9129.48			67.8667	4454.43			67.8667	6319.8			67.8667	4873.41			67.8667	3971.84
68	9079.77			68	4431.23			68	6032.71			68	4889.76			68	4003.07
68.1333	9099.03			68.1333	4388.22			68.1333	5819.15			68.1333	4904.03			68.1333	3981.84
Sum	5.59062e+06			Sum	5.32708e+06			Sum	6.20196e+06			Sum	3.11198e+06			Sum	4.76882e+06		Average	5.00009e+06
Normalized to WT Average	1.1181			Normalized to WT Average	1.0654			Normalized to WT Average	1.24037			Normalized to WT Average	0.622385			Normalized to WT Average	0.953747		Normalized to WT Average	1

## Sheet: V409I 091919
VI neuron 1 z stack_405_561_640				VI neuron 2 z stack_405_561_640				VI neuron 3 z stack_405_561_640				VI neuron 4 z stack_405_561_640				VI neuron 5 z stack_405_561_640
Distance_(microns)	Gray_Value			Distance_(microns)	Gray_Value			Distance_(microns)	Gray_Value			Distance_(microns)	Gray_Value			Distance_(microns)	Gray_Value
0	4373.3			0	5689.63			0	7686.99			0	10502.4			0	4452.13
0.1333	4358.69			0.1333	5748.24			0.1333	7671.49			0.1333	10420.8			0.1333	4647.63
0.2667	4358.26			0.2667	5771.35			0.2667	7649.9			0.2667	10321.5			0.2667	4849.22
0.4	4363.07			0.4	5812.55			0.4	7670.39			0.4	10430.1			0.4	5215.85
0.5333	4399.77			0.5333	5867.61			0.5333	7656.51			0.5333	10498.4			0.5333	5658.57
0.6667	4378.47			0.6667	5875.52			0.6667	7551.41			0.6667	10453.5			0.6667	5974.21
0.8	4395.61			0.8	5858.17			0.8	7599.73			0.8	10484.7			0.8	6243.37
0.9333	4382.74			0.9333	5812.63			0.9333	7595.44			0.9333	10496.7			0.9333	6412.8
1.0667	4397.51			1.0667	5811.82			1.0667	7627.18			1.0667	10640.4			1.0667	6588.2
1.2	4411.54			1.2	5791.66			1.2	7629.06			1.2	10670.8			1.2	6812.86
1.3333	4363.88			1.3333	5752.02			1.3333	7625.5			1.3333	10688.6			1.3333	6878.4
1.4667	4375.26			1.4667	5751.23			1.4667	7624.5			1.4667	10693.8			1.4667	6946.15
1.6	4415.33			1.6	5770.27			1.6	7625.54			1.6	10726.7			1.6	7030.95
1.7333	4452.53			1.7333	5834.88			1.7333	7651.09			1.7333	10696.8			1.7333	7063.34
1.8667	4425.14			1.8667	5823.17			1.8667	7756.1			1.8667	10686.7			1.8667	7007.93
2	4439.6			2	5841.34			2	7733.92			2	10677.5			2	7060.65
2.1333	4438.72			2.1333	5862.07			2.1333	7852.46			2.1333	10691.9			2.1333	7117.11
2.2667	4452.07			2.2667	5937			2.2667	7924.31			2.2667	10776.4			2.2667	7174.13
2.4	4431.31			2.4	5986.25			2.4	7909.62			2.4	10792.6			2.4	7167.51
2.5333	4431.88			2.5333	6043.18			2.5333	7960.18			2.5333	10839.7			2.5333	7131.52
2.6667	4433.4			2.6667	6068.78			2.6667	7930.12			2.6667	10886.2			2.6667	7140.76
2.8	4427.75			2.8	6078.77			2.8	8017.29			2.8	10905.2			2.8	7176.18
2.9333	4423.36			2.9333	6088.06			2.9333	8098.68			2.9333	11002.1			2.9333	7150.47
3.0667	4421.83			3.0667	6036.84			3.0667	8087.07			3.0667	11086.1			3.0667	7180.11
3.2	4401.63			3.2	5953.71			3.2	8078.66			3.2	11107.2			3.2	7115.28
3.3333	4428.39			3.3333	5963.24			3.3333	8160.94			3.3333	11318.2			3.3333	7177.93
3.4667	4413.99			3.4667	5933.15			3.4667	8179.9			3.4667	11517.5			3.4667	7085.91
3.6	4424.42			3.6	5946.97			3.6	8149.69			3.6	11678.8			3.6	7100.39
3.7333	4396.4			3.7333	5951.39			3.7333	8167.15			3.7333	11792.8			3.7333	7063.91
3.8667	4421.47			3.8667	5967.62			3.8667	8147.95			3.8667	11825.7			3.8667	7030.06
4	4473.66			4	6021.52			4	8164.05			4	12025.3			4	7004.54
4.1333	4490.14			4.1333	5984.34			4.1333	8175.52			4.1333	12127.6			4.1333	6892.88
4.2667	4480.61			4.2667	6006.93			4.2667	8209.08			4.2667	12229			4.2667	6727.74
4.4	4494.04			4.4	5988.32			4.4	8224.07			4.4	12277.5			4.4	6636.64
4.5333	4493.27			4.5333	5941.23			4.5333	8288.45			4.5333	12321.3			4.5333	6486.49
4.6667	4502.16			4.6667	5928.39			4.6667	8242.46			4.6667	12303.4			4.6667	6326.55
4.8	4477.77			4.8	5934.84			4.8	8152.42			4.8	12369.3			4.8	6213.97
4.9333	4490.92			4.9333	5966.73			4.9333	8214			4.9333	12451.6			4.9333	6155.39
5.0667	4496.48			5.0667	5942.05			5.0667	8242.24			5.0667	12631.4			5.0667	6064.78
5.2	4492.33			5.2	5938.89			5.2	8306.58			5.2	12573.7			5.2	6053.13
5.3333	4466.91			5.3333	5900.87			5.3333	8364.72			5.3333	12576.6			5.3333	5999.36
5.4667	4496.05			5.4667	5883.08			5.4667	8365.33			5.4667	12460.8			5.4667	5973.22
5.6	4497.47			5.6	5945.27			5.6	8465.47			5.6	12386.1			5.6	5948.89
5.7333	4500.93			5.7333	6035.99			5.7333	8519.98			5.7333	12358.8			5.7333	5949.17
5.8667	4487.95			5.8667	6094.51			5.8667	8663.02			5.8667	12237.7			5.8667	5967.88
6	4483.34			6	6174.48			6	8782.78			6	12110.3			6	5978.58
6.1333	4506.95			6.1333	6200.58			6.1333	8922.21			6.1333	11918.9			6.1333	5984.02
6.2667	4517.76			6.2667	6235.54			6.2667	9125.85			6.2667	11774			6.2667	6014.21
6.4	4522.24			6.4	6231.58			6.4	9307.87			6.4	11718.5			6.4	6022.01
6.5333	4514.02			6.5333	6267.45			6.5333	9474.08			6.5333	11557.6			6.5333	6052.67
6.6667	4517.33			6.6667	6334.91			6.6667	9619.53			6.6667	11458			6.6667	6036.51
6.8	4498.9			6.8	6368.44			6.8	9824.42			6.8	11419			6.8	6009.6
6.9333	4493.72			6.9333	6444.17			6.9333	9916.56			6.9333	11445.1			6.9333	6005.31
7.0667	4505.86			7.0667	6501.34			7.0667	9987.9			7.0667	11465.7			7.0667	6005.72
7.2	4511.9			7.2	6613.07			7.2	10215.5			7.2	11453.1			7.2	5946.33
7.3333	4558.99			7.3333	6651.95			7.3333	10532.4			7.3333	11465.8			7.3333	5906.99
7.4667	4563.68			7.4667	6717.33			7.4667	10907.5			7.4667	11394.3			7.4667	5908.75
7.6	4566.31			7.6	6773.33			7.6	11413.3			7.6	11342.8			7.6	5869.09
7.7333	4579.16			7.7333	6829.62			7.7333	11799.3			7.7333	11264.5			7.7333	5876.82
7.8667	4596.76			7.8667	6858.21			7.8667	11709.6			7.8667	11104.4			7.8667	5907.86
8	4585.07			8	6871.47			8	11277.7			8	11018.5			8	5965.23
8.1333	4598.2			8.1333	6853.73			8.1333	10650.4			8.1333	10905.1			8.1333	6014.41
8.2667	4582.78			8.2667	6813.31			8.2667	10111.8			8.2667	10803.3			8.2667	6062.52
8.4	4576.98			8.4	6837.17			8.4	9736.87			8.4	10653.2			8.4	6039.88
8.5333	4591.8			8.5333	6887.6			8.5333	9436.58			8.5333	10764.4			8.5333	6023.23
8.6667	4576.37			8.6667	6964.62			8.6667	9314.57			8.6667	10772.8			8.6667	6065.31
8.8	4633.8			8.8	7112.44			8.8	9138.43			8.8	10929			8.8	6066.26
8.9333	4624.23			8.9333	7143.94			8.9333	9006.02			8.9333	10867.2			8.9333	6122.76
9.0667	4650.2			9.0667	7226			9.0667	8895.83			9.0667	10944.5			9.0667	6178.91
9.2	4656.24			9.2	7283.02			9.2	8780.37			9.2	10933.4			9.2	6174.3
9.3333	4676.52			9.3333	7349.72			9.3333	8703.56			9.3333	10935.6			9.3333	6163.91
9.4667	4677.33			9.4667	7451.2			9.4667	8642.82			9.4667	10922.8			9.4667	6117.51
9.6	4695.07			9.6	7505.22			9.6	8607.39			9.6	10977.9			9.6	6139.13
9.7333	4662.03			9.7333	7499.12			9.7333	8548.91			9.7333	10984.6			9.7333	6114.79
9.8667	4684.98			9.8667	7465.38			9.8667	8547.28			9.8667	10927.3			9.8667	6093.75
10	4679.95			10	7434.77			10	8529.51			10	10806.4			10	6167.54
10.1333	4724.15			10.1333	7445.86			10.1333	8499.42			10.1333	10775.7			10.1333	6234.39
10.2667	4713.99			10.2667	7396.3			10.2667	8471.57			10.2667	10593.7			10.2667	6276.31
10.4	4695.38			10.4	7363.06			10.4	8364.04			10.4	10480.1			10.4	6335.21
10.5333	4676.16			10.5333	7381.82			10.5333	8276.58			10.5333	10365.8			10.5333	6305.33
10.6667	4653.36			10.6667	7401.14			10.6667	8172.98			10.6667	10252.4			10.6667	6327.56
10.8	4608.46			10.8	7469.4			10.8	8096.39			10.8	10237.3			10.8	6341.12
10.9333	4622.93			10.9333	7462.43			10.9333	8106.4			10.9333	10149.9			10.9333	6390.87
11.0667	4619.57			11.0667	7505.16			11.0667	8064.36			11.0667	10187.4			11.0667	6430.66
11.2	4633.76			11.2	7549.01			11.2	8006.18			11.2	10162.7			11.2	6495.79
11.3333	4636.56			11.3333	7572.45			11.3333	7999.81			11.3333	10218.9			11.3333	6448.73
11.4667	4648.87			11.4667	7604.28			11.4667	7883.02			11.4667	10230.3			11.4667	6429.24
11.6	4643.81			11.6	7540.38			11.6	7901.09			11.6	10201.7			11.6	6324.38
11.7333	4654.93			11.7333	7563.29			11.7333	7743.31			11.7333	10241.1			11.7333	6252.86
11.8667	4688.34			11.8667	7556.47			11.8667	7681.49			11.8667	10241.1			11.8667	6204.84
12	4700.19			12	7597.33			12	7616.3			12	10169.9			12	6188.23
12.1333	4662.96			12.1333	7581.39			12.1333	7548.81			12.1333	10203.5			12.1333	6236.19
12.2667	4662.41			12.2667	7627.96			12.2667	7471.66			12.2667	10240.2			12.2667	6321.69
12.4	4624.95			12.4	7551.52			12.4	7471.24			12.4	10368.2			12.4	6357.89
12.5333	4621.4			12.5333	7580.33			12.5333	7415.07			12.5333	10422.5			12.5333	6362.71
12.6667	4636.45			12.6667	7672.98			12.6667	7390.41			12.6667	10478.4			12.6667	6412.44
12.8	4669.68			12.8	7730.21			12.8	7397.35			12.8	10531.7			12.8	6356.53
12.9333	4666.94			12.9333	7827.91			12.9333	7472.16			12.9333	10603.6			12.9333	6391
13.0667	4698.15			13.0667	7966.57			13.0667	7522.22			13.0667	10561.1			13.0667	6473.81
13.2	4728.17			13.2	8049.57			13.2	7554.58			13.2	10580.8			13.2	6541.49
13.3333	4778.39			13.3333	8061.31			13.3333	7596.65			13.3333	10625.1			13.3333	6610.48
13.4667	4732.7			13.4667	8049.3			13.4667	7612.88			13.4667	10692.1			13.4667	6685.67
13.6	4744.53			13.6	8050.11			13.6	7592.92			13.6	10672.6			13.6	6750.57
13.7333	4738.83			13.7333	7967.35			13.7333	7624.58			13.7333	10747.5			13.7333	6819.11
13.8667	4702.84			13.8667	7931.47			13.8667	7584.73			13.8667	10818.4			13.8667	6808.98
14	4705.55			14	7940.59			14	7574.01			14	10912.8			14	6822.88
14.1333	4743.05			14.1333	7973.49			14.1333	7640.38			14.1333	11044.8			14.1333	6850.16
14.2667	4756.39			14.2667	7967.46			14.2667	7613.05			14.2667	11117.4			14.2667	6946.5
14.4	4755.53			14.4	7952.93			14.4	7619.14			14.4	11053.8			14.4	7017.69
14.5333	4753.03			14.5333	7933.1			14.5333	7625.68			14.5333	11123.2			14.5333	7084.63
14.6667	4752.07			14.6667	8004.26			14.6667	7625.34			14.6667	11127			14.6667	7156.92
14.8	4757.66			14.8	8037.51			14.8	7623.22			14.8	11154.9			14.8	7285.52
14.9333	4809.81			14.9333	8090.95			14.9333	7722.4			14.9333	11278.4			14.9333	7324.3
15.0667	4814.94			15.0667	8085.14			15.0667	7774.74			15.0667	11180.9			15.0667	7461.83
15.2	4819.54			15.2	8164.24			15.2	7834.44			15.2	11223.7			15.2	7630.07
15.3333	4835.55			15.3333	8109.19			15.3333	7846.04			15.3333	11161.2			15.3333	7914.22
15.4667	4822.51			15.4667	8163.38			15.4667	7845.07			15.4667	11236.5			15.4667	8156.09
15.6	4879.76			15.6	8150.55			15.6	7792.33			15.6	11248.9			15.6	8552.68
15.7333	4901.2			15.7333	8195.09			15.7333	7786.75			15.7333	11191.6			15.7333	9129
15.8667	4908.73			15.8667	8216.88			15.8667	7809.85			15.8667	11301.9			15.8667	9737.46
16	4908.27			16	8299.45			16	7853.31			16	11389.3			16	10326.2
16.1333	4890.51			16.1333	8376.34			16.1333	7897.79			16.1333	11391.3			16.1333	10879.7
16.2667	4895.57			16.2667	8488.3			16.2667	7924.62			16.2667	11336.7			16.2667	11321.1
16.4	4864.43			16.4	8489.96			16.4	7986.02			16.4	11377.9			16.4	11876.5
16.5333	4826.06			16.5333	8534.04			16.5333	8022.65			16.5333	11479.9			16.5333	12492
16.6667	4768.59			16.6667	8556.48			16.6667	8017			16.6667	11561.1			16.6667	12817.6
16.8	4813.31			16.8	8508.1			16.8	8033.05			16.8	11854.3			16.8	12948.4
16.9333	4824.41			16.9333	8478.59			16.9333	8045.6			16.9333	12078.1			16.9333	12909.2
17.0667	4807.67			17.0667	8516.86			17.0667	8063.15			17.0667	12173			17.0667	12617.1
17.2	4859.16			17.2	8571.75			17.2	8097.91			17.2	12291.6			17.2	12334.2
17.3333	4884.74			17.3333	8648.78			17.3333	8196.02			17.3333	12431.8			17.3333	11867.6
17.4667	4913.63			17.4667	8687.01			17.4667	8284.36			17.4667	12485.1			17.4667	11347.8
17.6	4993.02			17.6	8735.4			17.6	8286.25			17.6	12481.5			17.6	10775.2
17.7333	5010.27			17.7333	8815.43			17.7333	8282.41			17.7333	12370.6			17.7333	10431.6
17.8667	5032.48			17.8667	8788.66			17.8667	8308.97			17.8667	12239.3			17.8667	10015.4
18	5070.27			18	8799.49			18	8336.41			18	12018.5			18	9709.11
18.1333	5102.16			18.1333	8790.27			18.1333	8350.35			18.1333	11892.3			18.1333	9439.48
18.2667	5101.84			18.2667	8844.45			18.2667	8485.06			18.2667	11788.1			18.2667	9231.78
18.4	5162.32			18.4	8836.08			18.4	8477.22			18.4	11720.9			18.4	9082.58
18.5333	5162.14			18.5333	8928.62			18.5333	8524.81			18.5333	11828.8			18.5333	8946.9
18.6667	5153.41			18.6667	8938.87			18.6667	8528.61			18.6667	11882			18.6667	8859.35
18.8	5151.51			18.8	9048.72			18.8	8540.31			18.8	11916.7			18.8	9037.41
18.9333	5206.34			18.9333	9129.47			18.9333	8557.77			18.9333	11851			18.9333	9142.01
19.0667	5248.38			19.0667	9249.55			19.0667	8553.41			19.0667	11822			19.0667	9367.09
19.2	5227.33			19.2	9293.05			19.2	8548.42			19.2	11822.4			19.2	9621.89
19.3333	5256.14			19.3333	9237.94			19.3333	8557.03			19.3333	11717.5			19.3333	9797.55
19.4667	5273.22			19.4667	9164.01			19.4667	8573.68			19.4667	11751.4			19.4667	9909.79
19.6	5288.63			19.6	9174.18			19.6	8572.85			19.6	11754.8			19.6	10006.7
19.7333	5281.66			19.7333	9273.54			19.7333	8607.36			19.7333	11737.5			19.7333	9943.6
19.8667	5256.51			19.8667	9383.44			19.8667	8628.77			19.8667	11795.7			19.8667	9962.57
20	5251.46			20	9565.75			20	8610.83			20	11815.6			20	10014.7
20.1333	5274.56			20.1333	9776.98			20.1333	8672.16			20.1333	11777			20.1333	10100.9
20.2667	5325.26			20.2667	9891.55			20.2667	8706.37			20.2667	11774.5			20.2667	10220.6
20.4	5368.09			20.4	9916.67			20.4	8785.39			20.4	11741.9			20.4	10416.5
20.5333	5375.73			20.5333	10037.5			20.5333	8863.17			20.5333	11670.7			20.5333	10764.3
20.6667	5419.94			20.6667	10193.4			20.6667	8829.05			20.6667	11654.1			20.6667	11190.8
20.8	5549.86			20.8	10225.2			20.8	8924.15			20.8	11555.7			20.8	11582.9
20.9333	5694.53			20.9333	10260.4			20.9333	8885.46			20.9333	11587.1			20.9333	12103.2
21.0667	5856.48			21.0667	10252.1			21.0667	8946.5			21.0667	11627.1			21.0667	12354.2
21.2	5897.03			21.2	10228.7			21.2	8978.08			21.2	11655.5			21.2	12348
21.3333	5895.71			21.3333	10076.3			21.3333	8997.29			21.3333	11716.2			21.3333	12276.5
21.4667	5914.31			21.4667	9946.7			21.4667	9061.35			21.4667	11749.5			21.4667	12153.7
21.6	5945.82			21.6	9855.9			21.6	9164.94			21.6	11675.1			21.6	12113.9
21.7333	5924.97			21.7333	9810.99			21.7333	9236.45			21.7333	11576.1			21.7333	11935.4
21.8667	6044.61			21.8667	9798.34			21.8667	9383.23			21.8667	11630.8			21.8667	11993
22	6189.98			22	9787.21			22	9424.28			22	11714.3			22	12019.4
22.1333	6229.78			22.1333	9747.58			22.1333	9521.38			22.1333	11637.5			22.1333	12307.1
22.2667	6192.84			22.2667	9831.49			22.2667	9594.08			22.2667	11544.9			22.2667	12549
22.4	6272.94			22.4	9798.57			22.4	9676.03			22.4	11512			22.4	12995.8
22.5333	6312.52			22.5333	9848.22			22.5333	9744.29			22.5333	11480.8			22.5333	13456.4
22.6667	6401.13			22.6667	9838.29			22.6667	9931.93			22.6667	11523.9			22.6667	13866
22.8	6455.65			22.8	9752.97			22.8	10073.2			22.8	11465.6			22.8	14186.4
22.9333	6544.23			22.9333	9797.31			22.9333	10230.5			22.9333	11448.4			22.9333	14523.5
23.0667	6673.1			23.0667	9809.75			23.0667	10379.7			23.0667	11523.5			23.0667	14874.4
23.2	6839.85			23.2	9760.73			23.2	10488.4			23.2	11503.3			23.2	15012.9
23.3333	7002.42			23.3333	9798.57			23.3333	10697.4			23.3333	11494.6			23.3333	14891.5
23.4667	7179.47			23.4667	9852.6			23.4667	10890.6			23.4667	11621.7			23.4667	14928.2
23.6	7236.92			23.6	9918.02			23.6	11180.8			23.6	11627.4			23.6	15070.2
23.7333	7227.46			23.7333	9986.67			23.7333	11465.8			23.7333	11696.9			23.7333	15297.2
23.8667	7194.98			23.8667	10020.7			23.8667	11848.3			23.8667	11694.5			23.8667	15442.4
24	7186.83			24	10057.3			24	12203.7			24	11705			24	15548.9
24.1333	7142.41			24.1333	9955.31			24.1333	12456.9			24.1333	11663.2			24.1333	15677.9
24.2667	7166.71			24.2667	9974.07			24.2667	12733.2			24.2667	11761.3			24.2667	15869.8
24.4	7218.08			24.4	9995.88			24.4	13062.9			24.4	11930.8			24.4	16119.8
24.5333	7195.27			24.5333	9998.76			24.5333	13421.5			24.5333	12071.5			24.5333	16083.5
24.6667	7160.85			24.6667	9985.13			24.6667	13586.3			24.6667	12162.3			24.6667	16127.4
24.8	7069.17			24.8	10053.2			24.8	13842.9			24.8	12266.8			24.8	15991.8
24.9333	6978.13			24.9333	10064.7			24.9333	14014.1			24.9333	12342.1			24.9333	15876.2
25.0667	7034.61			25.0667	10050.5			25.0667	14238.7			25.0667	12353.4			25.0667	15764.2
25.2	7140.11			25.2	10115.3			25.2	14567.3			25.2	12465.7			25.2	15638.7
25.3333	7264			25.3333	10111.2			25.3333	14965.1			25.3333	12536.1			25.3333	15727.9
25.4667	7443.76			25.4667	10111			25.4667	15164.4			25.4667	12637.6			25.4667	15729.1
25.6	7614.52			25.6	10203			25.6	15401.6			25.6	12838			25.6	15892.3
25.7333	7614.52			25.7333	10269.2			25.7333	15633.2			25.7333	12990.5			25.7333	16032.8
25.8667	7715.48			25.8667	10289.4			25.8667	15806.9			25.8667	13086.9			25.8667	16036.4
26	7690.54			26	10415.2			26	15992.2			26	13326			26	16006.8
26.1333	7712.64			26.1333	10460.3			26.1333	16130.4			26.1333	13303.3			26.1333	16035.2
26.2667	7756.43			26.2667	10428.7			26.2667	16287			26.2667	13334.7			26.2667	16197.3
26.4	7761.71			26.4	10488.6			26.4	16431.6			26.4	13395.3			26.4	16261.3
26.5333	7794.57			26.5333	10640			26.5333	16681.7			26.5333	13364.2			26.5333	16391.1
26.6667	7807.3			26.6667	10760.3			26.6667	16965.1			26.6667	13442.2			26.6667	16662.1
26.8	7778.78			26.8	10872.1			26.8	17341.9			26.8	13495.8			26.8	16803.9
26.9333	7837.92			26.9333	10835.3			26.9333	17667.6			26.9333	13639.8			26.9333	17129.9
27.0667	7910.26			27.0667	10853.7			27.0667	18041.1			27.0667	13795.3			27.0667	17290.5
27.2	7927.78			27.2	10771.5			27.2	18258			27.2	13983.9			27.2	17765.7
27.3333	7960.63			27.3333	10717.9			27.3333	18416.9			27.3333	14070.1			27.3333	18369.7
27.4667	8084.24			27.4667	10736.7			27.4667	18536.2			27.4667	14104.7			27.4667	19100.2
27.6	8170.61			27.6	10706.1			27.6	18567.5			27.6	14259.6			27.6	20411.2
27.7333	8277.69			27.7333	10717.9			27.7333	18623.1			27.7333	14347			27.7333	22548.3
27.8667	8388.31			27.8667	10617.3			27.8667	18696.4			27.8667	14502.8			27.8667	25941
28	8536.57			28	10646.6			28	18766.4			28	14434			28	31392.2
28.1333	8843.93			28.1333	10590.5			28.1333	18880.7			28.1333	14442			28.1333	39282.1
28.2667	9162.7			28.2667	10586.8			28.2667	18854.4			28.2667	14340			28.2667	47404.8
28.4	9594.48			28.4	10586.3			28.4	18818.8			28.4	14319.7			28.4	55430.5
28.5333	10073.9			28.5333	10479.8			28.5333	19040.8			28.5333	14348.7			28.5333	61403.2
28.6667	10759.3			28.6667	10358.3			28.6667	18951.9			28.6667	14475.8			28.6667	61312
28.8	11809.7			28.8	10406.3			28.8	18942.5			28.8	14572.1			28.8	55863.3
28.9333	13234.3			28.9333	10267.4			28.9333	18919.9			28.9333	14722.6			28.9333	48790
29.0667	15145			29.0667	10259.8			29.0667	19143.3			29.0667	14727.4			29.0667	42860.5
29.2	17396.9			29.2	10356			29.2	19252.5			29.2	14809.1			29.2	38034.2
29.3333	19647.5			29.3333	10513.9			29.3333	19362.8			29.3333	14893.9			29.3333	33795
29.4667	20702.4			29.4667	10640.5			29.4667	19541			29.4667	14895.4			29.4667	30376.5
29.6	20632.8			29.6	11052.9			29.6	19756.6			29.6	14897.7			29.6	27707.9
29.7333	20131.3			29.7333	11535.3			29.7333	20042.9			29.7333	14889.9			29.7333	25826.6
29.8667	19673.8			29.8667	11921			29.8667	20354.5			29.8667	15034.6			29.8667	24641.2
30	19326.4			30	12431.3			30	20388.3			30	15059.5			30	23956.3
30.1333	18678.4			30.1333	12932.3			30.1333	20617.8			30.1333	14932.1			30.1333	23425.2
30.2667	17991.5			30.2667	13576.2			30.2667	20758.4			30.2667	14769.3			30.2667	23088.1
30.4	17373.7			30.4	14208.3			30.4	21053.4			30.4	14721.4			30.4	22693.1
30.5333	16885.2			30.5333	14879.4			30.5333	21327.1			30.5333	14614.9			30.5333	22353.4
30.6667	16454.7			30.6667	15497.4			30.6667	21587.1			30.6667	14658.3			30.6667	22007.7
30.8	16238.1			30.8	16158.9			30.8	22000.2			30.8	14696.9			30.8	21506
30.9333	15929.6			30.9333	16954.5			30.9333	22443.8			30.9333	14627.9			30.9333	21133.2
31.0667	15732.1			31.0667	17758.9			31.0667	22792.3			31.0667	14577.6			31.0667	20967.5
31.2	15592.8			31.2	18814.7			31.2	23303.2			31.2	14506.9			31.2	20885.4
31.3333	15593.5			31.3333	19810.1			31.3333	23877.3			31.3333	14411.3			31.3333	20878.8
31.4667	15746.5			31.4667	20890.4			31.4667	24614.4			31.4667	14402.8			31.4667	20713.2
31.6	15806			31.6	21862			31.6	25115.5			31.6	14388.6			31.6	20778.9
31.7333	15997.8			31.7333	22820.8			31.7333	25563.8			31.7333	14409.7			31.7333	20834.1
31.8667	16081			31.8667	23528.1			31.8667	26076.8			31.8667	14472.3			31.8667	20889.1
32	16105.9			32	24133.1			32	26380.9			32	14391.3			32	21175.4
32.1333	16124			32.1333	24996.2			32.1333	26850.7			32.1333	14487.5			32.1333	21452.6
32.2667	16009.6			32.2667	25588.3			32.2667	27275.7			32.2667	14505.7			32.2667	21933.1
32.4	15749.3			32.4	25948.8			32.4	27780.9			32.4	14440.2			32.4	22481.6
32.5333	15573.1			32.5333	26451.1			32.5333	28487.9			32.5333	14521.3			32.5333	22776
32.6667	15350.2			32.6667	26683			32.6667	29133			32.6667	14579.7			32.6667	22937.6
32.8	15217.8			32.8	26778.9			32.8	29611.3			32.8	14608.2			32.8	23167.1
32.9333	15295			32.9333	26608.3			32.9333	29924.5			32.9333	14665			32.9333	23723.9
33.0667	15409.5			33.0667	26301.7			33.0667	30349.8			33.0667	14608.9			33.0667	24475.2
33.2	15398.9			33.2	26107.5			33.2	30636.2			33.2	14544.6			33.2	25076.9
33.3333	15447.6			33.3333	26219.5			33.3333	30847.9			33.3333	14470			33.3333	25951.9
33.4667	15272.5			33.4667	26202.4			33.4667	31239.4			33.4667	14406			33.4667	26778.7
33.6	15074.5			33.6	26121.3			33.6	31534.7			33.6	14441.1			33.6	27437.5
33.7333	14885.9			33.7333	25918.1			33.7333	32008.5			33.7333	14541			33.7333	27921.4
33.8667	14814.3			33.8667	25373.6			33.8667	32179.4			33.8667	14593.9			33.8667	28146.9
34	14889.4			34	24693.1			34	32431.7			34	14696.8			34	28505.7
34.1333	15026.4			34.1333	24285.8			34.1333	32668.5			34.1333	14964.5			34.1333	29211.5
34.2667	15287.5			34.2667	23815.2			34.2667	32915.5			34.2667	15175.9			34.2667	30320.8
34.4	15697.6			34.4	23422.9			34.4	33240.1			34.4	15378			34.4	31231.4
34.5333	16015.5			34.5333	23246.4			34.5333	33455.2			34.5333	15602.8			34.5333	31333.8
34.6667	16325.9			34.6667	23356.1			34.6667	33568.6			34.6667	15880.6			34.6667	30877.5
34.8	16234.1			34.8	23639.3			34.8	33876.8			34.8	15990.9			34.8	30185
34.9333	16035.6			34.9333	23999.2			34.9333	34374.6			34.9333	16100.5			34.9333	29692.1
35.0667	15840.6			35.0667	24366.9			35.0667	34831.6			35.0667	16181.2			35.0667	29291.3
35.2	15728.3			35.2	24582.9			35.2	35623.8			35.2	16396.7			35.2	29240.2
35.3333	15560.8			35.3333	24629.9			35.3333	36391.3			35.3333	16540.8			35.3333	28817.1
35.4667	15379.1			35.4667	24759.7			35.4667	37519.1			35.4667	16701.8			35.4667	28554.2
35.6	15439.3			35.6	25254.3			35.6	38688.3			35.6	16980			35.6	28361.1
35.7333	15546.8			35.7333	26117.5			35.7333	39954			35.7333	17046.4			35.7333	28387.3
35.8667	15654			35.8667	27742.7			35.8667	41456.9			35.8667	17251.4			35.8667	28411.7
36	15728			36	30452.6			36	43083.1			36	17510.5			36	28486.9
36.1333	15962			36.1333	34235.4			36.1333	45029.7			36.1333	17486.3			36.1333	28770.5
36.2667	16101.1			36.2667	37856.6			36.2667	46865.5			36.2667	17747.5			36.2667	29506.3
36.4	16523.8			36.4	41266.2			36.4	48709.9			36.4	18032			36.4	30495
36.5333	16704.2			36.5333	44905.8			36.5333	50604.9			36.5333	18328.8			36.5333	31027.5
36.6667	16844.9			36.6667	49329.5			36.6667	52433.7			36.6667	18505.9			36.6667	31887.9
36.8	17105.4			36.8	54487			36.8	53941.5			36.8	18609.3			36.8	32860
36.9333	17542			36.9333	56306.7			36.9333	55348.3			36.9333	18641			36.9333	34134.5
37.0667	17941.2			37.0667	52716.8			37.0667	57187.9			37.0667	18769			37.0667	36064.5
37.2	18492			37.2	45785.6			37.2	58633			37.2	18953.1			37.2	39411.1
37.3333	19158.6			37.3333	39044.4			37.3333	59808.9			37.3333	19033.9			37.3333	44403.9
37.4667	20073.3			37.4667	33956.1			37.4667	61197.4			37.4667	19053			37.4667	51444.3
37.6	20847.3			37.6	30291.4			37.6	62702.3			37.6	19013			37.6	60681.3
37.7333	21343.3			37.7333	27260.9			37.7333	64280.8			37.7333	18960			37.7333	70923.8
37.8667	21859.1			37.8667	24655.7			37.8667	66377.3			37.8667	18900.6			37.8667	79315.5
38	22339.6			38	22217.2			38	68279.8			38	18986.9			38	82993.3
38.1333	22770.2			38.1333	20371.7			38.1333	67989.4			38.1333	19028.9			38.1333	80026.7
38.2667	23575.6			38.2667	18961.6			38.2667	66468.5			38.2667	19166.6			38.2667	74938.9
38.4	24423.7			38.4	17901.7			38.4	64434.4			38.4	19231.4			38.4	68915.7
38.5333	25599.2			38.5333	16978.2			38.5333	62182.9			38.5333	19286.2			38.5333	61355.6
38.6667	26991.7			38.6667	16288.9			38.6667	59961.3			38.6667	19366			38.6667	54843.8
38.8	28238.9			38.8	15499.5			38.8	58182.5			38.8	19519.6			38.8	50533.9
38.9333	29425.3			38.9333	14856.7			38.9333	56722.7			38.9333	19723.5			38.9333	47593.5
39.0667	30400.8			39.0667	14254.5			39.0667	56064.6			39.0667	19913.6			39.0667	45547.3
39.2	31081.5			39.2	13859.3			39.2	55773			39.2	19954.2			39.2	43605.9
39.3333	31482.5			39.3333	13608.5			39.3333	56066.9			39.3333	19962.4			39.3333	41574.2
39.4667	30965.6			39.4667	13424.5			39.4667	56781.8			39.4667	20058.6			39.4667	39672
39.6	30090.4			39.6	13485.4			39.6	57534.1			39.6	19985.7			39.6	37776.6
39.7333	28987.5			39.7333	13399.6			39.7333	58563.8			39.7333	20024.3			39.7333	36070.6
39.8667	27313.3			39.8667	13403.3			39.8667	59474.9			39.8667	19975.2			39.8667	34267.3
40	25460.1			40	13281.9			40	60356.8			40	20232.2			40	32753
40.1333	23938.8			40.1333	12981.7			40.1333	61153.9			40.1333	20339.5			40.1333	31272.8
40.2667	22567.9			40.2667	12705.1			40.2667	61830.6			40.2667	20453.5			40.2667	30390.1
40.4	21412			40.4	12425.2			40.4	62426.5			40.4	20463.5			40.4	29780.3
40.5333	20148.9			40.5333	12173.8			40.5333	62970.4			40.5333	20580.7			40.5333	29210.3
40.6667	19142.8			40.6667	11961.5			40.6667	63229.3			40.6667	20634.6			40.6667	28633.3
40.8	18217.6			40.8	11740.6			40.8	64095.5			40.8	20616.4			40.8	27682.9
40.9333	17536.3			40.9333	11587.7			40.9333	65493.5			40.9333	20288.1			40.9333	27109
41.0667	16921.8			41.0667	11278.1			41.0667	67324.9			41.0667	19951			41.0667	26845.1
41.2	16497			41.2	11058.3			41.2	69427.9			41.2	19424.3			41.2	26509.1
41.3333	16319.5			41.3333	10909.7			41.3333	72228.1			41.3333	19090.6			41.3333	26556.8
41.4667	16078.1			41.4667	10822.6			41.4667	74424.6			41.4667	18967.8			41.4667	26795.9
41.6	15925.7			41.6	10829.6			41.6	75966.4			41.6	18891.2			41.6	27092.6
41.7333	15748.3			41.7333	10800			41.7333	76206.2			41.7333	18846.7			41.7333	27208.9
41.8667	15656.1			41.8667	10735.3			41.8667	75656.6			41.8667	18902.4			41.8667	27232.2
42	15610.5			42	10733.4			42	74271.1			42	19094.6			42	27636.8
42.1333	15652			42.1333	10737.9			42.1333	72241.2			42.1333	19166.2			42.1333	28205.1
42.2667	15805.3			42.2667	10798.7			42.2667	70672.7			42.2667	19345.5			42.2667	28309
42.4	15875.6			42.4	10796.5			42.4	69263.4			42.4	19277.9			42.4	28510.2
42.5333	15890.8			42.5333	10799.4			42.5333	68695.3			42.5333	19408.9			42.5333	28284.7
42.6667	16096.6			42.6667	10727			42.6667	68744.6			42.6667	19343			42.6667	27878
42.8	16389			42.8	10643			42.8	69782.3			42.8	19455.5			42.8	27136.5
42.9333	16938.7			42.9333	10727.8			42.9333	70953.1			42.9333	19608.4			42.9333	25871.1
43.0667	17666.4			43.0667	10806.3			43.0667	71914.9			43.0667	19603.7			43.0667	24627.1
43.2	18719.7			43.2	10954.8			43.2	72053.6			43.2	19573.5			43.2	23348.5
43.3333	19745.3			43.3333	11029.4			43.3333	72419.1			43.3333	19762.7			43.3333	22198.9
43.4667	21255.9			43.4667	11134.4			43.4667	71467.8			43.4667	19929.7			43.4667	20931.9
43.6	22920.4			43.6	11383			43.6	70188.8			43.6	20049.8			43.6	19928.4
43.7333	24068.7			43.7333	11766.4			43.7333	68632.8			43.7333	20187.4			43.7333	18939.8
43.8667	23810.9			43.8667	12080.6			43.8667	67455.3			43.8667	20093.7			43.8667	17958.4
44	22308.9			44	12274.4			44	66320.4			44	20068.3			44	17057.9
44.1333	20576.4			44.1333	12118.8			44.1333	65055.1			44.1333	20537			44.1333	16234.5
44.2667	19340.8			44.2667	11699.5			44.2667	63652.3			44.2667	21344.8			44.2667	15508.2
44.4	18466			44.4	11111.7			44.4	61819.2			44.4	22439.8			44.4	14968.3
44.5333	17393.5			44.5333	10834			44.5333	59648.8			44.5333	23921.2			44.5333	14331.5
44.6667	15946			44.6667	10617.2			44.6667	57545.5			44.6667	26106.9			44.6667	13602.6
44.8	14632			44.8	10427.2			44.8	55440.9			44.8	29081.5			44.8	12929.4
44.9333	13537.4			44.9333	10244.8			44.9333	53161.3			44.9333	32964.6			44.9333	12534.1
45.0667	12855			45.0667	10089.7			45.0667	50458.8			45.0667	36952.4			45.0667	11916.7
45.2	12196			45.2	9961.68			45.2	48212.3			45.2	39845.3			45.2	11475.9
45.3333	11792.6			45.3333	9912.19			45.3333	45795.4			45.3333	39972.5			45.3333	11114
45.4667	11305.1			45.4667	9766.55			45.4667	43345.9			45.4667	38434.2			45.4667	10741.3
45.6	11008.6			45.6	9789.51			45.6	40987.1			45.6	35793.1			45.6	10378.8
45.7333	10850.9			45.7333	9793.99			45.7333	38711.2			45.7333	33060.2			45.7333	9985.57
45.8667	10539.9			45.8667	9729.46			45.8667	36597.1			45.8667	30926.8			45.8667	9748.81
46	10256.5			46	9643.06			46	34561.1			46	29352.8			46	9506.96
46.1333	9949.88			46.1333	9633.01			46.1333	32987.5			46.1333	28446.7			46.1333	9338.67
46.2667	9613.34			46.2667	9593.07			46.2667	31701.3			46.2667	28160.7			46.2667	9209.04
46.4	9292.76			46.4	9565.24			46.4	30270			46.4	28117.9			46.4	9053.9
46.5333	8948.65			46.5333	9456.29			46.5333	29157.6			46.5333	27791.7			46.5333	8873.04
46.6667	8700.15			46.6667	9414.14			46.6667	28256.3			46.6667	27488.5			46.6667	8787.9
46.8	8578.9			46.8	9456.23			46.8	27387.1			46.8	27192			46.8	8651.54
46.9333	8362.18			46.9333	9388.93			46.9333	26605.1			46.9333	26936.4			46.9333	8545.88
47.0667	8206.15			47.0667	9364.78			47.0667	25970.2			47.0667	26667.1			47.0667	8453.73
47.2	8009.43			47.2	9368.65			47.2	25315.4			47.2	26234.4			47.2	8410.42
47.3333	7942.82			47.3333	9333.06			47.3333	24812.1			47.3333	25996.7			47.3333	8397.44
47.4667	7868.27			47.4667	9289.38			47.4667	24185			47.4667	25819.6			47.4667	8326.89
47.6	7710.22			47.6	9407.34			47.6	23655.9			47.6	25773.8			47.6	8280.12
47.7333	7501.79			47.7333	9362.98			47.7333	23243.2			47.7333	25757.1			47.7333	8342.64
47.8667	7334.69			47.8667	9365.81			47.8667	22754.8			47.8667	25934.3			47.8667	8299.96
48	7268.62			48	9432.32			48	22526.2			48	26356			48	8249.99
48.1333	7229.36			48.1333	9459.1			48.1333	22299.9			48.1333	26589.6			48.1333	8267.71
48.2667	7193.24			48.2667	9501.1			48.2667	22044.9			48.2667	26904.7			48.2667	8255.17
48.4	7214.14			48.4	9525.28			48.4	21840.9			48.4	27413.4			48.4	8161.08
48.5333	7267.81			48.5333	9599.67			48.5333	21818			48.5333	27825.1			48.5333	8120.47
48.6667	7287.33			48.6667	9775.04			48.6667	21658.5			48.6667	28584			48.6667	8063.2
48.8	7251.07			48.8	10112.2			48.8	21540.8			48.8	29467.4			48.8	8058.89
48.9333	7159.55			48.9333	10733.8			48.9333	21345.3			48.9333	30512.3			48.9333	8150.21
49.0667	7238.27			49.0667	11275.2			49.0667	21209.5			49.0667	31445			49.0667	8133.58
49.2	7238.07			49.2	11359.4			49.2	20949.8			49.2	32487			49.2	8183.52
49.3333	7234.77			49.3333	11183.5			49.3333	20820.6			49.3333	33775.1			49.3333	8249.06
49.4667	7224.35			49.4667	10745.7			49.4667	20685.3			49.4667	35059			49.4667	8350.69
49.6	7249.66			49.6	10333.8			49.6	20565.4			49.6	36480.6			49.6	8355.81
49.7333	7253.92			49.7333	9964.79			49.7333	20435.9			49.7333	38063.7			49.7333	8463.55
49.8667	7262.59			49.8667	9534.97			49.8667	20229.8			49.8667	39637.8			49.8667	8448.61
50	7220.49			50	9325.6			50	20029.5			50	41186.4			50	8418.41
50.1333	7269.6			50.1333	9104.49			50.1333	19848.7			50.1333	42900.4			50.1333	8368.88
50.2667	7204.15			50.2667	9025.43			50.2667	19751.4			50.2667	44104.8			50.2667	8327.29
50.4	7155.69			50.4	9046.37			50.4	19642.6			50.4	44956.6			50.4	8266.65
50.5333	7109.73			50.5333	9091.87			50.5333	19660.8			50.5333	45518.8			50.5333	8126.85
50.6667	7101.45			50.6667	9095.43			50.6667	19691.2			50.6667	45721.4			50.6667	8109.93
50.8	7109.77			50.8	9098.95			50.8	19507.3			50.8	46009			50.8	8102.23
50.9333	7102.08			50.9333	9195.83			50.9333	19457.7			50.9333	46590.9			50.9333	8022.56
51.0667	7149.47			51.0667	9171.95			51.0667	19369.7			51.0667	47925.5			51.0667	7998.31
51.2	7194.79			51.2	9102.33			51.2	19246			51.2	49608.3			51.2	7955.26
51.3333	7185.02			51.3333	9103.6			51.3333	19201.5			51.3333	53190.6			51.3333	7865.14
51.4667	7176.87			51.4667	9102.82			51.4667	19112.9			51.4667	59748.3			51.4667	7777.09
51.6	7157.88			51.6	8933.46			51.6	19076.5			51.6	70532.3			51.6	7688.5
51.7333	7138.12			51.7333	8905.11			51.7333	18903			51.7333	82798.1			51.7333	7647.55
51.8667	7138.6			51.8667	8950			51.8667	18972.7			51.8667	93203.2			51.8667	7630.29
52	7095.73			52	8934.24			52	18938.2			52	100781			52	7602.8
52.1333	7037.93			52.1333	9006.45			52.1333	18989.9			52.1333	105422			52.1333	7651.8
52.2667	7047.53			52.2667	9009.08			52.2667	19164.8			52.2667	104403			52.2667	7570.7
52.4	7054.99			52.4	9040.68			52.4	19170.3			52.4	95787			52.4	7533.25
52.5333	7018.98			52.5333	8947.51			52.5333	19230.2			52.5333	84308.8			52.5333	7538.54
52.6667	6923.7			52.6667	8986.1			52.6667	19321.4			52.6667	72030.9			52.6667	7431.39
52.8	6902.01			52.8	9051.43			52.8	19218.3			52.8	59764.9			52.8	7379.49
52.9333	6802.29			52.9333	9149.05			52.9333	19118.2			52.9333	50256.2			52.9333	7403.07
53.0667	6778.53			53.0667	9113.78			53.0667	18879.5			53.0667	43694.1			53.0667	7371.19
53.2	6762.31			53.2	9161.66			53.2	18667.9			53.2	38976.6			53.2	7400.57
53.3333	6778.87			53.3333	9217.97			53.3333	18534.1			53.3333	35073.6			53.3333	7353.03
53.4667	6828.55			53.4667	9275.03			53.4667	18227.9			53.4667	32456.6			53.4667	7298.73
53.6	6874.19			53.6	9257.26			53.6	18283.2			53.6	30666			53.6	7222.6
53.7333	6872.16			53.7333	9338.27			53.7333	18339.5			53.7333	29475.6			53.7333	7194.71
53.8667	6918.42			53.8667	9318.43			53.8667	18423.8			53.8667	28791.7			53.8667	7232.65
54	6866.32			54	9334.13			54	18528.1			54	28437.3			54	7219.38
54.1333	6787.26			54.1333	9344.44			54.1333	18752.7			54.1333	28063			54.1333	7192.39
54.2667	6782.67			54.2667	9335.95			54.2667	19094.3			54.2667	27116.7			54.2667	7224.1
54.4	6867.95			54.4	9360.54			54.4	19397.1			54.4	25678.5			54.4	7192.57
54.5333	7072.3			54.5333	9399.17			54.5333	19526			54.5333	23997.7			54.5333	7150.25
54.6667	7394.23			54.6667	9364.64			54.6667	19665.2			54.6667	22417			54.6667	7191.21
54.8	7982.26			54.8	9432.77			54.8	19488.3			54.8	21156.3			54.8	7170.12
54.9333	8820.04			54.9333	9445.52			54.9333	19445.4			54.9333	20544.1			54.9333	7194.12
55.0667	9654.59			55.0667	9478.6			55.0667	19209.7			55.0667	19936.7			55.0667	7147.21
55.2	10507.2			55.2	9436.84			55.2	18915.7			55.2	19419			55.2	7161.18
55.3333	11120.9			55.3333	9499.8			55.3333	18462.8			55.3333	18840.2			55.3333	7118.08
55.4667	11865			55.4667	9497.27			55.4667	18198.8			55.4667	18270.7			55.4667	7112.34
55.6	12465.3			55.6	9528.23			55.6	17969.8			55.6	17614.3			55.6	7094.71
55.7333	12952.4			55.7333	9485.76			55.7333	17640.4			55.7333	17074			55.7333	7072.6
55.8667	13368.6			55.8667	9552.21			55.8667	17256.6			55.8667	16573.6			55.8667	7093.48
56	13751.1			56	9530.93			56	17068.2			56	16326.8			56	7055.47
56.1333	13919.6			56.1333	9513.74			56.1333	16951.4			56.1333	15967.2			56.1333	6960.76
56.2667	14061.3			56.2667	9570.3			56.2667	16921.9			56.2667	15782.8			56.2667	6880.15
56.4	14042.4			56.4	9506.39			56.4	16828.1			56.4	15683.1			56.4	6807.63
56.5333	14180.4			56.5333	9597.42			56.5333	16777			56.5333	15605.5			56.5333	6699.32
56.6667	14235.3			56.6667	9571.26			56.6667	16680.3			56.6667	15381.9			56.6667	6702.42
56.8	14279.7			56.8	9612.47			56.8	16515			56.8	15380.2			56.8	6684.85
56.9333	14389.5			56.9333	9602.6			56.9333	16456.5			56.9333	15242.2			56.9333	6694.52
57.0667	14285.8			57.0667	9665.66			57.0667	16375.9			57.0667	15217.3			57.0667	6675.37
57.2	14047.7			57.2	9684.32			57.2	16311.7			57.2	15313.7			57.2	6699.95
57.3333	13915			57.3333	9597.4			57.3333	16157.6			57.3333	15328.6			57.3333	6686.49
57.4667	13839.4			57.4667	9605.31			57.4667	16078.3			57.4667	15294.1			57.4667	6683.28
57.6	13830.6			57.6	9592.74			57.6	15914			57.6	15303.5			57.6	6566.16
57.7333	13975.6			57.7333	9640.39			57.7333	15922.8			57.7333	15336			57.7333	6522.2
57.8667	14063.9			57.8667	9762.82			57.8667	15826.8			57.8667	15127.2			57.8667	6520.08
58	13960.9			58	9883.48			58	15810.7			58	14732.6			58	6478.58
58.1333	13550.6			58.1333	9859.62			58.1333	15794.4			58.1333	14128.7			58.1333	6381.67
58.2667	13002.3			58.2667	9996.24			58.2667	15641.6			58.2667	13566.7			58.2667	6302.13
58.4	12464.2			58.4	10024.7			58.4	15561.3			58.4	13064.6			58.4	6281.21
58.5333	12034.8			58.5333	9984.76			58.5333	15486.7			58.5333	12728.3			58.5333	6257.54
58.6667	11547.5			58.6667	10024.5			58.6667	15362.6			58.6667	12413.4			58.6667	6235.5
58.8	11054.8			58.8	10102.2			58.8	15303.1			58.8	12169.3			58.8	6218.81
58.9333	10542.5			58.9333	10170.4			58.9333	15242.7			58.9333	12035.6			58.9333	6238.14
59.0667	10125.3			59.0667	10196.9			59.0667	15252.2			59.0667	11853.2			59.0667	6281.9
59.2	9759.5			59.2	10281.2			59.2	15179.6			59.2	11809			59.2	6337.66
59.3333	9548.01			59.3333	10385.6			59.3333	15268.2			59.3333	11610.4			59.3333	6259.4
59.4667	9347.03			59.4667	10323.5			59.4667	15136.7			59.4667	11599.8			59.4667	6054.57
59.6	9233.57			59.6	10374.1			59.6	15106.1			59.6	11478.5			59.6	5761.57
59.7333	9051.24			59.7333	10251.6			59.7333	15145.4			59.7333	11348.4			59.7333	5535.41
59.8667	8870.03			59.8667	10163.6			59.8667	15104.8			59.8667	11134.2			59.8667	5382.03
60	8648.32			60	10102.9			60	14982.2			60	10975.4			60	5298.11
60.1333	8485.09			60.1333	10150.1			60.1333	14968.5			60.1333	10924.9			60.1333	5260.08
60.2667	8381.06			60.2667	10185			60.2667	14891.8			60.2667	10837.7			60.2667	5228.61
60.4	8264.99			60.4	10195.1			60.4	14824.5			60.4	10759			60.4	5159.85
60.5333	8242.75			60.5333	10280.9			60.5333	14827.1			60.5333	10620.9			60.5333	5098.59
60.6667	8152.22			60.6667	10338.1			60.6667	14660.5			60.6667	10522			60.6667	5034.17
60.8	8036.62			60.8	10325.5			60.8	14689.5			60.8	10392.2			60.8	5011.62
60.9333	7927.37			60.9333	10239.2			60.9333	14742.1			60.9333	10327.6			60.9333	4986.84
61.0667	7680.64			61.0667	10093.6			61.0667	14761.4			61.0667	10328.5			61.0667	5037.83
61.2	7441.55			61.2	10005.3			61.2	14776.6			61.2	10296.7			61.2	5017.98
61.3333	7141.47			61.3333	9958.58			61.3333	14946.7			61.3333	10371.1			61.3333	5042.68
61.4667	6979.77			61.4667	9875.74			61.4667	15038.6			61.4667	10397.7			61.4667	5033.99
61.6	6777.23			61.6	9771.86			61.6	15191			61.6	10521			61.6	5017.77
61.7333	6679.67			61.7333	9744.29			61.7333	15426.9			61.7333	10564			61.7333	5021.14
61.8667	6613.1			61.8667	9625.24			61.8667	15751.8			61.8667	10500.7			61.8667	5023.99
62	6568.46			62	9513.73			62	16177.4			62	10435.8			62	5000.33
62.1333	6545.39			62.1333	9412.41			62.1333	16889.6			62.1333	10132.8			62.1333	5016.43
62.2667	6503.35			62.2667	9292.91			62.2667	17773.7			62.2667	9947.26			62.2667	5044.72
62.4	6386.77			62.4	9279.54			62.4	18777.8			62.4	9765.27			62.4	5036.48
62.5333	6305.07			62.5333	9185.49			62.5333	19881.9			62.5333	9580.09			62.5333	5077.22
62.6667	6162.05			62.6667	9158.22			62.6667	21002.5			62.6667	9637.86			62.6667	5086.77
62.8	5955.01			62.8	9212.31			62.8	22344			62.8	9669.72			62.8	5069.42
62.9333	5741.46			62.9333	9214.55			62.9333	24081.3			62.9333	9773.58			62.9333	5062.65
63.0667	5549.82			63.0667	9258.07			63.0667	26673.4			63.0667	9781.27			63.0667	5052.27
63.2	5505.52			63.2	9316.49			63.2	29013.7			63.2	9718.9			63.2	5004.65
63.3333	5488.98			63.3333	9353.15			63.3333	29909.3			63.3333	9686.28			63.3333	4955.84
63.4667	5459.63			63.4667	9313.4			63.4667	28755.7			63.4667	9626.59			63.4667	4900.32
63.6	5437.56			63.6	9224.23			63.6	26727.3			63.6	9526.71			63.6	4873.63
63.7333	5465.96			63.7333	9236.48			63.7333	24448.7			63.7333	9449.98			63.7333	4843.33
63.8667	5466.26			63.8667	9291.02			63.8667	22377.2			63.8667	9374.62			63.8667	4767.72
64	5393.94			64	9287.73			64	20460.1			64	9317.79			64	4738.48
64.1333	5405.68			64.1333	9426.17			64.1333	18913.1			64.1333	9297.37			64.1333	4742.71
64.2667	5447.27			64.2667	9445.65			64.2667	17772.2			64.2667	9355.03			64.2667	4734.82
64.4	5519.89			64.4	9521.09			64.4	16875.8			64.4	9424.74			64.4	4754.52
64.5333	5692.98			64.5333	9449.36			64.5333	16259.3			64.5333	9334.96			64.5333	4765.72
64.6667	5939.69			64.6667	9312.72			64.6667	15853.3			64.6667	9212.7			64.6667	4774.21
64.8	6360.01			64.8	9244.41			64.8	15706.5			64.8	9110.77			64.8	4761.4
64.9333	6887.66			64.9333	9228.81			64.9333	15605.2			64.9333	9000.95			64.9333	4767.59
65.0667	7698.33			65.0667	9093.41			65.0667	15536.6			65.0667	8819.3			65.0667	4779.95
65.2	8697.07			65.2	9056.85			65.2	15636			65.2	8653.39			65.2	4759.22
65.3333	9674.24			65.3333	9011.54			65.3333	15578.2			65.3333	8583.47			65.3333	4761.83
65.4667	10353.9			65.4667	8955.06			65.4667	15619.7			65.4667	8473.26			65.4667	4781.4
65.6	10660.8			65.6	8885.52			65.6	15606.1			65.6	8398.14			65.6	4807.31
65.7333	10620.9			65.7333	8843.4			65.7333	15496.4			65.7333	8366.07			65.7333	4809.98
65.8667	10427			65.8667	8818.72			65.8667	15362.9			65.8667	8225.94			65.8667	4790.55
66	10272.2			66	8849.62			66	15465.1			66	8169.55			66	4758.71
66.1333	10033.6			66.1333	8897.38			66.1333	15362.4			66.1333	8131.34			66.1333	4760.78
66.2667	9741.48			66.2667	8942.34			66.2667	15497.6			66.2667	8016.67			66.2667	4746.75
66.4	9427.79			66.4	8881.72			66.4	15454.7			66.4	8008.31			66.4	4735.34
66.5333	9107.81			66.5333	8876.81			66.5333	15401.9			66.5333	7980.11			66.5333	4675.1
66.6667	8779.3			66.6667	8793.8			66.6667	15217.9			66.6667	7958.82			66.6667	4674.9
66.8	8546.4			66.8	8871.95			66.8	15115			66.8	7972.7			66.8	4621.28
66.9333	8526.3			66.9333	8884.14			66.9333	14850.3			66.9333	7902.91			66.9333	4585.94
67.0667	8409.15			67.0667	8978.4			67.0667	14656.3			67.0667	7851.18			67.0667	4547.66
67.2	8217.25			67.2	9144.54			67.2	14506.1			67.2	7821.15			67.2	4516.73
67.3333	7966.76			67.3333	9188.85			67.3333	14359.9			67.3333	7757.46			67.3333	4495.52
67.4667	7792.27			67.4667	9245.99			67.4667	14301.9			67.4667	7781.94			67.4667	4481.94
67.6	7624.79			67.6	9304.06			67.6	14102			67.6	7776.67			67.6	4439.73
67.7333	7485.5			67.7333	9257.74			67.7333	14031.3			67.7333	7744.64			67.7333	4397.81
67.8667	7342.74			67.8667	9238.43			67.8667	13894.5			67.8667	7674.22			67.8667	4365.57
68	7146.2			68	9196.88			68	13755.6			68	7650.55			68	4340.88
68.1333	6949.65			68.1333	9019.11			68.1333	13443.2			68.1333	7574.75			68.1333	4306.93
Sum	4.93636e+06			Sum	5.79994e+06			Sum	5.33583e+06			Sum	3.85266e+06			Sum	5.75257e+06		Average	5.13547e+06		WT Average	5.00009e+06
Normalized to WT Average	0.987253			Normalized to WT Average	1.15997			Normalized to WT Average	1.06715			Normalized to WT Average	0.770518			Normalized to WT Average	1.15049		Normalized to WT Average	1.02708

## Sheet: V409A 091919
VA neuron 1 40X z stack_405_488_561_640					VA neuron 40X z stack_405_488_561_640_1x1 large image						VA neuron 7 40X z stack_405_488_561_640_1x1 large image						VA neuron 9 40X z stack_640_1x1 large image
Distance_(microns)	Gray_Value				Distance_(microns)	Gray_Value					Distance_(microns)	Gray_Value					Distance_(microns)	Gray_Value
0	2955.66				0	2405.93					0	2233.98					0	2577.85
0.1333	2942.93				0.1333	2417.11					0.1333	2255.24					0.1333	2589.06
0.2667	2889.97				0.2667	2413.61					0.2667	2236.54					0.2667	2577.44
0.4	2811.68				0.4	2431.08					0.4	2256.01					0.4	2581.17
0.5333	2712.64				0.5333	2402.74					0.5333	2239.92					0.5333	2551.22
0.6667	2616.02				0.6667	2401.33					0.6667	2256.08					0.6667	2549.83
0.8	2543.86				0.8	2362.23					0.8	2233.85					0.8	2522.5
0.9333	2509.19				0.9333	2373.83					0.9333	2244.94					0.9333	2516.8
1.0667	2461.22				1.0667	2376.47					1.0667	2238.25					1.0667	2529.86
1.2	2449.25				1.2	2384.64					1.2	2257.3					1.2	2526.19
1.3333	2455.27				1.3333	2359.09					1.3333	2246.67					1.3333	2498.34
1.4667	2453.22				1.4667	2354.33					1.4667	2225.99					1.4667	2501.97
1.6	2445.2				1.6	2361.21					1.6	2244.65					1.6	2504.07
1.7333	2432.1				1.7333	2360.99					1.7333	2258.39					1.7333	2511.05
1.8667	2448.02				1.8667	2377.59					1.8667	2252.65					1.8667	2501.43
2	2435.01				2	2383.42					2	2247.95					2	2506.58
2.1333	2466.82				2.1333	2365.72					2.1333	2244.55					2.1333	2504.39
2.2667	2449.61				2.2667	2349.37					2.2667	2250.98					2.2667	2479.14
2.4	2474.17				2.4	2330.55					2.4	2280.48					2.4	2477.6
2.5333	2461.15				2.5333	2292.39					2.5333	2267.95					2.5333	2432.78
2.6667	2467.85				2.6667	2293.31					2.6667	2272.32					2.6667	2433.08
2.8	2461.79				2.8	2277.14					2.8	2283.24					2.8	2412.42
2.9333	2472.64				2.9333	2295.28					2.9333	2314.08					2.9333	2421.43
3.0667	2481				3.0667	2275.73					3.0667	2295.47					3.0667	2403.85
3.2	2490.53				3.2	2277.91					3.2	2303.53					3.2	2392.26
3.3333	2493.34				3.3333	2271.58					3.3333	2291.33					3.3333	2376.14
3.4667	2527.55				3.4667	2262.97					3.4667	2329.67					3.4667	2388.78
3.6	2536.8				3.6	2273.73					3.6	2326.13					3.6	2394.02
3.7333	2533.76				3.7333	2264.64					3.7333	2348.98					3.7333	2387.35
3.8667	2522.19				3.8667	2259.31					3.8667	2378.4					3.8667	2387.67
4	2555.01				4	2265.15					4	2420.83					4	2388.65
4.1333	2584.61				4.1333	2256.04					4.1333	2445.24					4.1333	2372.28
4.2667	2581.16				4.2667	2270.02					4.2667	2476.06					4.2667	2378.33
4.4	2579.83				4.4	2276.6					4.4	2525.1					4.4	2409.33
4.5333	2589.25				4.5333	2292.26					4.5333	2599.75					4.5333	2407.03
4.6667	2629.19				4.6667	2281.85					4.6667	2696.53					4.6667	2402.97
4.8	2654.01				4.8	2277.55					4.8	2864.18					4.8	2412.55
4.9333	2648.12				4.9333	2264.72					4.9333	3134.35					4.9333	2416.47
5.0667	2664.38				5.0667	2269.8					5.0667	3550.09					5.0667	2412.97
5.2	2684.03				5.2	2274.09					5.2	3885.77					5.2	2401.91
5.3333	2693.74				5.3333	2280.5					5.3333	4102.94					5.3333	2407.51
5.4667	2676.4				5.4667	2279.52					5.4667	4042					5.4667	2417.64
5.6	2654.52				5.6	2294.39					5.6	3937.67					5.6	2411.48
5.7333	2672.3				5.7333	2297.39					5.7333	3808.37					5.7333	2408.2
5.8667	2710.47				5.8667	2305.7					5.8667	3668.81					5.8667	2433.52
6	2715.72				6	2326.4					6	3529.25					6	2441.81
6.1333	2740.8				6.1333	2318.16					6.1333	3484.63					6.1333	2451.2
6.2667	2771.88				6.2667	2312.76					6.2667	3479.68					6.2667	2453.08
6.4	2772.24				6.4	2325.87					6.4	3489.16					6.4	2462.68
6.5333	2796.69				6.5333	2310.92					6.5333	3517.04					6.5333	2457.66
6.6667	2793.69				6.6667	2307.68					6.6667	3527.06					6.6667	2428.61
6.8	2817.08				6.8	2294.83					6.8	3518.75					6.8	2417.99
6.9333	2821.41				6.9333	2288.87					6.9333	3512.02					6.9333	2423.47
7.0667	2793.17				7.0667	2296.46					7.0667	3487.12					7.0667	2398.57
7.2	2823.15				7.2	2278.45					7.2	3505.04					7.2	2416.76
7.3333	2850.91				7.3333	2289.95					7.3333	3568.63					7.3333	2396.55
7.4667	2870.89				7.4667	2273.58					7.4667	3652.38					7.4667	2398.17
7.6	2911.64				7.6	2271.09					7.6	3739.18					7.6	2395.65
7.7333	2922.17				7.7333	2272.48					7.7333	3748.76					7.7333	2399.51
7.8667	2929.21				7.8667	2272.82					7.8667	3815.53					7.8667	2399.6
8	2948.96				8	2286.42					8	3828.34					8	2390.55
8.1333	2933.88				8.1333	2277.61					8.1333	3816.04					8.1333	2394.81
8.2667	2907.78				8.2667	2281.03					8.2667	3831.7					8.2667	2409.35
8.4	2939.35				8.4	2293.03					8.4	3848.3					8.4	2397.08
8.5333	2901.21				8.5333	2286.19					8.5333	3873.51					8.5333	2408.49
8.6667	2910.52				8.6667	2288.56					8.6667	3859.78					8.6667	2421.76
8.8	2939.37				8.8	2294.5					8.8	3842.93					8.8	2430.51
8.9333	2938.23				8.9333	2302.59					8.9333	3821.02					8.9333	2436.22
9.0667	2939.13				9.0667	2289.34					9.0667	3828.54					9.0667	2415.51
9.2	2953.32				9.2	2294.49					9.2	3819.27					9.2	2394.11
9.3333	2953.33				9.3333	2263.95					9.3333	3784.28					9.3333	2385.3
9.4667	2928.49				9.4667	2258.95					9.4667	3766.45					9.4667	2402.58
9.6	2960.86				9.6	2264.95					9.6	3710.02					9.6	2406.35
9.7333	2954.08				9.7333	2273.23					9.7333	3655.22					9.7333	2379.09
9.8667	2947.21				9.8667	2257.74					9.8667	3670.39					9.8667	2397.58
10	2965.65				10	2277.15					10	3635.83					10	2381.8
10.1333	2969.22				10.1333	2284.78					10.1333	3604.2					10.1333	2387.15
10.2667	2981.88				10.2667	2274.16					10.2667	3595.73					10.2667	2398.38
10.4	2986.25				10.4	2268.64					10.4	3556					10.4	2406.16
10.5333	2985.96				10.5333	2287.59					10.5333	3515.45					10.5333	2410.86
10.6667	3010.87				10.6667	2282.72					10.6667	3497.74					10.6667	2401.95
10.8	3007.22				10.8	2288.14					10.8	3513.75					10.8	2408.06
10.9333	3051.55				10.9333	2283.7					10.9333	3556.09					10.9333	2395.51
11.0667	3100.68				11.0667	2258.71					11.0667	3570.43					11.0667	2385.5
11.2	3105.37				11.2	2270.27					11.2	3611.27					11.2	2396.33
11.3333	3081.12				11.3333	2264.69					11.3333	3650.24					11.3333	2380.61
11.4667	3107.95				11.4667	2274.96					11.4667	3660.08					11.4667	2383.03
11.6	3116.17				11.6	2268.74					11.6	3705.75					11.6	2390.79
11.7333	3105.18				11.7333	2260.19					11.7333	3737.55					11.7333	2381.42
11.8667	3120.15				11.8667	2271.63					11.8667	3789.03					11.8667	2385.68
12	3120.67				12	2268.6					12	3841.01					12	2406.01
12.1333	3109.41				12.1333	2269.11					12.1333	3853.94					12.1333	2392.74
12.2667	3143.47				12.2667	2269.77					12.2667	3919.19					12.2667	2399.9
12.4	3112.82				12.4	2268.16					12.4	3946.22					12.4	2396.16
12.5333	3115.7				12.5333	2271.71					12.5333	3984.54					12.5333	2399.93
12.6667	3133.45				12.6667	2279.63					12.6667	3980.95					12.6667	2405.89
12.8	3152.31				12.8	2268.15					12.8	3947.08					12.8	2399
12.9333	3150.23				12.9333	2283.45					12.9333	3877.38					12.9333	2391.55
13.0667	3131.85				13.0667	2283.21					13.0667	3906.98					13.0667	2412.46
13.2	3163.91				13.2	2284.81					13.2	3876.92					13.2	2405.64
13.3333	3162.96				13.3333	2282.52					13.3333	3887.77					13.3333	2400.19
13.4667	3143.51				13.4667	2288.62					13.4667	3889.48					13.4667	2411.29
13.6	3134.42				13.6	2280.03					13.6	3964.85					13.6	2406.37
13.7333	3158				13.7333	2281.47					13.7333	3999.76					13.7333	2426.24
13.8667	3202.41				13.8667	2287.05					13.8667	3981.26					13.8667	2420.78
14	3258.64				14	2291.96					14	3931.47					14	2410.49
14.1333	3270.57				14.1333	2284.42					14.1333	3898.65					14.1333	2418.33
14.2667	3260.2				14.2667	2289					14.2667	3913.83					14.2667	2415.22
14.4	3257.53				14.4	2304.78					14.4	3928.03					14.4	2452.11
14.5333	3240.21				14.5333	2288.62					14.5333	3960.45					14.5333	2412.17
14.6667	3241.22				14.6667	2299.97					14.6667	4042.57					14.6667	2438.27
14.8	3295.9				14.8	2306.67					14.8	4100.38					14.8	2459.16
14.9333	3327.03				14.9333	2331					14.9333	4137.95					14.9333	2459.63
15.0667	3353.91				15.0667	2327.52					15.0667	4171.76					15.0667	2459.11
15.2	3348.89				15.2	2354.34					15.2	4228.89					15.2	2503.38
15.3333	3389.3				15.3333	2372.18					15.3333	4183.8					15.3333	2528.93
15.4667	3344.08				15.4667	2417.2					15.4667	4300.05					15.4667	2593.8
15.6	3345.64				15.6	2492.62					15.6	4433.27					15.6	2660.84
15.7333	3326.18				15.7333	2528.31					15.7333	4584.21					15.7333	2716.89
15.8667	3332.27				15.8667	2557.94					15.8667	4743.99					15.8667	2735.95
16	3351.89				16	2541.54					16	4920.42					16	2700.71
16.1333	3362.5				16.1333	2545.68					16.1333	5239.58					16.1333	2726.83
16.2667	3398.63				16.2667	2559.76					16.2667	5770.66					16.2667	2722.01
16.4	3447.84				16.4	2541.71					16.4	6373.08					16.4	2722.31
16.5333	3448.61				16.5333	2542.7					16.5333	7055.62					16.5333	2715.85
16.6667	3496.32				16.6667	2519.08					16.6667	7584.1					16.6667	2733.29
16.8	3511.9				16.8	2523					16.8	7957.87					16.8	2710.71
16.9333	3539.71				16.9333	2522.89					16.9333	8058.27					16.9333	2701.16
17.0667	3574.31				17.0667	2527.87					17.0667	8047.33					17.0667	2702.2
17.2	3544.59				17.2	2540.32					17.2	7747.25					17.2	2721.19
17.3333	3526.85				17.3333	2570.65					17.3333	7388.73					17.3333	2759.18
17.4667	3561.76				17.4667	2605.43					17.4667	6967.5					17.4667	2797.86
17.6	3572.61				17.6	2614.38					17.6	6547.25					17.6	2816.8
17.7333	3571.1				17.7333	2657.01					17.7333	6198.36					17.7333	2850.41
17.8667	3555.5				17.8667	2676.09					17.8667	6086.09					17.8667	2891.27
18	3562.01				18	2702.78					18	5892.7					18	2920.3
18.1333	3558.09				18.1333	2735.01					18.1333	5739.24					18.1333	2968.67
18.2667	3591.25				18.2667	2730.26					18.2667	5610.74					18.2667	2955.02
18.4	3631.5				18.4	2735.78					18.4	5482.81					18.4	2945.67
18.5333	3630.79				18.5333	2728.16					18.5333	5376.82					18.5333	2982.39
18.6667	3585.8				18.6667	2741.95					18.6667	5292.55					18.6667	2983.26
18.8	3643.51				18.8	2769.31					18.8	5175.98					18.8	3012.82
18.9333	3644.23				18.9333	2815.2					18.9333	5055.44					18.9333	3044.94
19.0667	3681.28				19.0667	2837.11					19.0667	4966.24					19.0667	3106.12
19.2	3675.02				19.2	2888.31					19.2	4917.85					19.2	3146.66
19.3333	3685.54				19.3333	2908.83					19.3333	4930.78					19.3333	3222.55
19.4667	3716.15				19.4667	2946.33					19.4667	4935.79					19.4667	3223.18
19.6	3732.98				19.6	2955.36					19.6	4984.44					19.6	3234.96
19.7333	3729.28				19.7333	2963.15					19.7333	5001.44					19.7333	3257.77
19.8667	3718.83				19.8667	2990.74					19.8667	5002.98					19.8667	3275.56
20	3722.77				20	2991.93					20	5021.77					20	3284.78
20.1333	3757.06				20.1333	3009					20.1333	4981.22					20.1333	3314.6
20.2667	3769.75				20.2667	2997.28					20.2667	4946.45					20.2667	3295.88
20.4	3839.82				20.4	3005.86					20.4	4928.53					20.4	3292.72
20.5333	3900.07				20.5333	3012.64					20.5333	4950.18					20.5333	3291.65
20.6667	4016.75				20.6667	2997.64					20.6667	4985.96					20.6667	3316.91
20.8	4110.03				20.8	3009.18					20.8	5004.45					20.8	3315.39
20.9333	4270.83				20.9333	2991.78					20.9333	5088.9					20.9333	3290.07
21.0667	4436.99				21.0667	2965.86					21.0667	5159.35					21.0667	3292.9
21.2	4468.65				21.2	2968.56					21.2	5119.18					21.2	3261.18
21.3333	4478.09				21.3333	2948.62					21.3333	5149.56					21.3333	3253.69
21.4667	4466.17				21.4667	2964.18					21.4667	5112.19					21.4667	3227.58
21.6	4386.94				21.6	2995.36					21.6	5208.35					21.6	3318.39
21.7333	4413.44				21.7333	3030.62					21.7333	5275.52					21.7333	3334.72
21.8667	4392.42				21.8667	3061.14					21.8667	5324.06					21.8667	3385.9
22	4424.44				22	3111.42					22	5440.77					22	3439.5
22.1333	4414.04				22.1333	3150.71					22.1333	5536.18					22.1333	3477.78
22.2667	4378.2				22.2667	3154.86					22.2667	5736.68					22.2667	3499.72
22.4	4386.77				22.4	3180.66					22.4	5859.64					22.4	3518.79
22.5333	4405.56				22.5333	3213.87					22.5333	5768.45					22.5333	3550.81
22.6667	4342.82				22.6667	3188.91					22.6667	5675.76					22.6667	3539.47
22.8	4292.22				22.8	3193.25					22.8	5555.85					22.8	3492.51
22.9333	4253.35				22.9333	3170.22					22.9333	5494.16					22.9333	3507.84
23.0667	4228.1				23.0667	3183.89					23.0667	5408.14					23.0667	3524.12
23.2	4215.62				23.2	3259.84					23.2	5415.13					23.2	3603.47
23.3333	4195.58				23.3333	3323.94					23.3333	5470.57					23.3333	3676.26
23.4667	4205.54				23.4667	3383.65					23.4667	5616.47					23.4667	3790.37
23.6	4183.64				23.6	3486.56					23.6	5639.24					23.6	3902.37
23.7333	4189.93				23.7333	3584.39					23.7333	5730.44					23.7333	4017.97
23.8667	4255.01				23.8667	3672.57					23.8667	5712.86					23.8667	4113.61
24	4276.43				24	3757.14					24	5726.36					24	4246.03
24.1333	4268.57				24.1333	3858.23					24.1333	5589.63					24.1333	4370.16
24.2667	4263.06				24.2667	3992.17					24.2667	5534.73					24.2667	4552.65
24.4	4326.16				24.4	4193.76					24.4	5449.13					24.4	4758.99
24.5333	4348.34				24.5333	4417.31					24.5333	5308.94					24.5333	5065.97
24.6667	4289.42				24.6667	4529.62					24.6667	5180.91					24.6667	5244.32
24.8	4281.27				24.8	4587.6					24.8	5100.05					24.8	5276.46
24.9333	4280.78				24.9333	4597.01					24.9333	5080.29					24.9333	5261.65
25.0667	4289.22				25.0667	4593.03					25.0667	5089.02					25.0667	5358.37
25.2	4331.68				25.2	4702.18					25.2	5184.32					25.2	5453.39
25.3333	4377.53				25.3333	4792.41					25.3333	5309.98					25.3333	5573.18
25.4667	4417.94				25.4667	4871.81					25.4667	5376.58					25.4667	5745.34
25.6	4489.24				25.6	4995.83					25.6	5479.61					25.6	5850.51
25.7333	4614.98				25.7333	5024.23					25.7333	5580.82					25.7333	5939.15
25.8667	4717.89				25.8667	5116.74					25.8667	5756.64					25.8667	5980.21
26	4917.89				26	5116.98					26	5787.7					26	5967.47
26.1333	5191.49				26.1333	5071.44					26.1333	5835.19					26.1333	6026.47
26.2667	5577.73				26.2667	5117.64					26.2667	5921.88					26.2667	6036.05
26.4	6079.07				26.4	5194.59					26.4	5987.45					26.4	6084.8
26.5333	6665.62				26.5333	5339.13					26.5333	6021.35					26.5333	6270.87
26.6667	7296.11				26.6667	5444.2					26.6667	6058.06					26.6667	6408.82
26.8	7534.29				26.8	5634.49					26.8	6081.98					26.8	6577.65
26.9333	7559.12				26.9333	5735.8					26.9333	6187.84					26.9333	6736.57
27.0667	7310.43				27.0667	5780.84					27.0667	6237.56					27.0667	6810.64
27.2	6870.16				27.2	5905.57					27.2	6224.28					27.2	6969.27
27.3333	6434.18				27.3333	6150.54					27.3333	6185.09					27.3333	7216.19
27.4667	6132.56				27.4667	6406.67					27.4667	6192.09					27.4667	7629.32
27.6	5950.17				27.6	6627.28					27.6	6198.36					27.6	7847.2
27.7333	5849.37				27.7333	6956.7					27.7333	6233.53					27.7333	8258.65
27.8667	5824.68				27.8667	7080.54					27.8667	6204.75					27.8667	8320.23
28	5815.38				28	7139.15					28	6261.54					28	8431.85
28.1333	5852.1				28.1333	7087.68					28.1333	6362.6					28.1333	8427.31
28.2667	5758.94				28.2667	7110.65					28.2667	6486.73					28.2667	8358.23
28.4	5742.44				28.4	7093.03					28.4	6443.78					28.4	8321.03
28.5333	5740.07				28.5333	6975.69					28.5333	6454.35					28.5333	8227.84
28.6667	5681.53				28.6667	6939.69					28.6667	6404.88					28.6667	8180.12
28.8	5733.47				28.8	6877.42					28.8	6441.02					28.8	8102.98
28.9333	5768.14				28.9333	6927.29					28.9333	6556.18					28.9333	8153.72
29.0667	5831.46				29.0667	6963.04					29.0667	6724.56					29.0667	8187.24
29.2	5833.66				29.2	6933.01					29.2	6913.94					29.2	8235.85
29.3333	5983.04				29.3333	6975.11					29.3333	7030.86					29.3333	8280.46
29.4667	6023.85				29.4667	6937.69					29.4667	6995.67					29.4667	8154.36
29.6	6053.98				29.6	6884.4					29.6	6947					29.6	8144.1
29.7333	6196.73				29.7333	6854.82					29.7333	6937.35					29.7333	8140.97
29.8667	6370.74				29.8667	6841.73					29.8667	7025.59					29.8667	8092.07
30	6516.4				30	6760.61					30	7165.69					30	8143.23
30.1333	6722.28				30.1333	6813.79					30.1333	7294.49					30.1333	8119.02
30.2667	7004.06				30.2667	6848.04					30.2667	7433.14					30.2667	8159.02
30.4	7270.9				30.4	6884.52					30.4	7625.34					30.4	8203.21
30.5333	7571.39				30.5333	6909.88					30.5333	7731					30.5333	8200.77
30.6667	7794.39				30.6667	6920.73					30.6667	7813.1					30.6667	8253.19
30.8	8087.39				30.8	6927.81					30.8	7982.17					30.8	8286.75
30.9333	8486.69				30.9333	6998.38					30.9333	8109.58					30.9333	8361.22
31.0667	8802.78				31.0667	7058.56					31.0667	8328.62					31.0667	8440.06
31.2	9356.42				31.2	7076.85					31.2	8723.44					31.2	8548.52
31.3333	9869.41				31.3333	7146.14					31.3333	9079.06					31.3333	8584.31
31.4667	10349.7				31.4667	7144.46					31.4667	9382.67					31.4667	8600.7
31.6	10800.1				31.6	7215.25					31.6	9715.27					31.6	8651.76
31.7333	11296.8				31.7333	7247.01					31.7333	10196.2					31.7333	8767.02
31.8667	11751				31.8667	7203.84					31.8667	10561.4					31.8667	8774.93
32	12292.2				32	7223.36					32	11054.8					32	8709.25
32.1333	12881.2				32.1333	7116.64					32.1333	11458.5					32.1333	8633.33
32.2667	13827.5				32.2667	7124.69					32.2667	11949.6					32.2667	8604.71
32.4	15028.7				32.4	7221.47					32.4	12363.5					32.4	8715.9
32.5333	15967.4				32.5333	7305.04					32.5333	12580.1					32.5333	8781.86
32.6667	16777.9				32.6667	7421.55					32.6667	12655.7					32.6667	8943.76
32.8	17237.1				32.8	7648.15					32.8	12672.7					32.8	9128.53
32.9333	17789.9				32.9333	7900					32.9333	12890.2					32.9333	9529.27
33.0667	17887.4				33.0667	8344.85					33.0667	13197.5					33.0667	10027.4
33.2	17987.6				33.2	8844.03					33.2	13710.3					33.2	10712.5
33.3333	18153.1				33.3333	9659.92					33.3333	14001.8					33.3333	11696.4
33.4667	18376.2				33.4667	10474.5					33.4667	14140.1					33.4667	12615
33.6	18567.1				33.6	11043.6					33.6	14419.5					33.6	13480.8
33.7333	18579.5				33.7333	11619					33.7333	15060.7					33.7333	14155.9
33.8667	18506.8				33.8667	12212.7					33.8667	15676.8					33.8667	14892.1
34	18239.2				34	12893.7					34	16011.1					34	15779.2
34.1333	17556.2				34.1333	13846.9					34.1333	16328.1					34.1333	16910.1
34.2667	16784.6				34.2667	14796.3					34.2667	16470					34.2667	18235.2
34.4	16221.5				34.4	15977.1					34.4	16650.7					34.4	19711.4
34.5333	15784				34.5333	17403.9					34.5333	16955.1					34.5333	21606.3
34.6667	15479.5				34.6667	18799.8					34.6667	17384.5					34.6667	23385.7
34.8	15140.3				34.8	20160.6					34.8	17777					34.8	24821.1
34.9333	14628.5				34.9333	21096.8					34.9333	18240.9					34.9333	26231.6
35.0667	14092.1				35.0667	21983.2					35.0667	18708.7					35.0667	27040.4
35.2	13663.6				35.2	22975.5					35.2	19290					35.2	28262.2
35.3333	13269				35.3333	24234.8					35.3333	19794.7					35.3333	29872.8
35.4667	12642.2				35.4667	25735.4					35.4667	20337.4					35.4667	31641.5
35.6	12097.9				35.6	27568.7					35.6	20947.6					35.6	33918.5
35.7333	11573.7				35.7333	29651.7					35.7333	21460.4					35.7333	36222.3
35.8667	11140.2				35.8667	31680.4					35.8667	21921.8					35.8667	37878.7
36	10818.2				36	32907.1					36	22405.2					36	39191.1
36.1333	10429.3				36.1333	33427.1					36.1333	22909.2					36.1333	39307.4
36.2667	9921.84				36.2667	33606.7					36.2667	23727.2					36.2667	39588
36.4	9479.76				36.4	33844					36.4	24373.2					36.4	39867.6
36.5333	8948.36				36.5333	33999.5					36.5333	25294.6					36.5333	40089.1
36.6667	8543.57				36.6667	34051.3					36.6667	26033.2					36.6667	39714
36.8	8139.43				36.8	34087.6					36.8	27029.6					36.8	39430.6
36.9333	7747.38				36.9333	33965.9					36.9333	28217.9					36.9333	38981.5
37.0667	7517.87				37.0667	34044.2					37.0667	29473.2					37.0667	38991.6
37.2	7297.81				37.2	34576.1					37.2	30595.2					37.2	39193.5
37.3333	7165.27				37.3333	35115.4					37.3333	31414.9					37.3333	39596.5
37.4667	7046.05				37.4667	35569.9					37.4667	32232.6					37.4667	39797.2
37.6	6853.51				37.6	36052.6					37.6	32874.6					37.6	40254.5
37.7333	6714.88				37.7333	36451.1					37.7333	33525.4					37.7333	40561.7
37.8667	6625.98				37.8667	36827.6					37.8667	34365.2					37.8667	40854.3
38	6482.75				38	36810.8					38	35428.3					38	40850.9
38.1333	6340.86				38.1333	36972.7					38.1333	36556.7					38.1333	40495.8
38.2667	6299.05				38.2667	37082.1					38.2667	37696.6					38.2667	40089.8
38.4	6237.3				38.4	37012.6					38.4	38997.8					38.4	39999.4
38.5333	6171.52				38.5333	36864.5					38.5333	40207.3					38.5333	39420.3
38.6667	6122.71				38.6667	36647.6					38.6667	41968.9					38.6667	38754.7
38.8	6068.83				38.8	36292.6					38.8	43815.1					38.8	38310.5
38.9333	6015.8				38.9333	35943.6					38.9333	45479					38.9333	38055.1
39.0667	5872.08				39.0667	35533.3					39.0667	46795.9					39.0667	37515.5
39.2	5726.49				39.2	35101.9					39.2	47865.4					39.2	36966.2
39.3333	5649.5				39.3333	34589.1					39.3333	48906.2					39.3333	36257
39.4667	5507.98				39.4667	33904.4					39.4667	49510.4					39.4667	35515.7
39.6	5461.88				39.6	33379.9					39.6	50573.4					39.6	34816.4
39.7333	5338.78				39.7333	32687.7					39.7333	51846.9					39.7333	34027.5
39.8667	5286.58				39.8667	32294.4					39.8667	53665.6					39.8667	33567
40	5297.65				40	32040.3					40	54714					40	33349.4
40.1333	5225.23				40.1333	31917					40.1333	54711.8					40.1333	33401.5
40.2667	5240.34				40.2667	32003.5					40.2667	53913.3					40.2667	33432
40.4	5162.67				40.4	32089.6					40.4	53525.8					40.4	33657
40.5333	5151.21				40.5333	32217.9					40.5333	53963.9					40.5333	34001.3
40.6667	5129.36				40.6667	32220.9					40.6667	54290					40.6667	34175.4
40.8	5136.16				40.8	32238.5					40.8	53780.1					40.8	34287
40.9333	5121.81				40.9333	32179.7					40.9333	52348.4					40.9333	34481.9
41.0667	5090.14				41.0667	32241.9					41.0667	49917.2					41.0667	34670.5
41.2	5084.2				41.2	32089.5					41.2	47223.3					41.2	35220.4
41.3333	5081.34				41.3333	32086.2					41.3333	44574					41.3333	35559.8
41.4667	5017.52				41.4667	32266					41.4667	41943.7					41.4667	35996
41.6	4968.34				41.6	32403.5					41.6	39806.3					41.6	36554.5
41.7333	4924.3				41.7333	32645					41.7333	38008.7					41.7333	36976
41.8667	4910.56				41.8667	32993.5					41.8667	36855.6					41.8667	37605.4
42	4945.49				42	33461.1					42	36039.8					42	38518.3
42.1333	4968.77				42.1333	33819.9					42.1333	35656.9					42.1333	39249.7
42.2667	4949.62				42.2667	34014.1					42.2667	35564.9					42.2667	39805.7
42.4	4936.43				42.4	33957.1					42.4	35482.6					42.4	39878.1
42.5333	5017.95				42.5333	33146.1					42.5333	35372					42.5333	39510.9
42.6667	5121.56				42.6667	31794.5					42.6667	35050.5					42.6667	38433.1
42.8	5178.31				42.8	30049.7					42.8	34849.9					42.8	36770
42.9333	5286.19				42.9333	28303					42.9333	34602.9					42.9333	34730.7
43.0667	5242.39				43.0667	26029.2					43.0667	34522.2					43.0667	32379.2
43.2	5156.52				43.2	23924					43.2	34180.3					43.2	29832.7
43.3333	4915.57				43.3333	22083.1					43.3333	34167.4					43.3333	27489.8
43.4667	4553.87				43.4667	20631					43.4667	33999.6					43.4667	25607.3
43.6	4179.88				43.6	19647.6					43.6	34161.7					43.6	24235.6
43.7333	3943.28				43.7333	18686.6					43.7333	34356.2					43.7333	23067.6
43.8667	3727.34				43.8667	17747					43.8667	34862.6					43.8667	21608.6
44	3613.46				44	16726.9					44	35572.8					44	20449.9
44.1333	3482.89				44.1333	15787.1					44.1333	36193.8					44.1333	19188
44.2667	3429.03				44.2667	14987.9					44.2667	36845.2					44.2667	18152.7
44.4	3359.42				44.4	14228.4					44.4	37276.9					44.4	17271.7
44.5333	3352.41				44.5333	13717.5					44.5333	37523.7					44.5333	16648.3
44.6667	3345.47				44.6667	13360.2					44.6667	37647.7					44.6667	16159.8
44.8	3346.37				44.8	13175.1					44.8	37735					44.8	15962.4
44.9333	3330.88				44.9333	13135.7					44.9333	37626.1					44.9333	15907.5
45.0667	3307.26				45.0667	13205.3					45.0667	37194.4					45.0667	15814.4
45.2	3302.99				45.2	13055.7					45.2	36678.1					45.2	15555.3
45.3333	3278.77				45.3333	12882.3					45.3333	35822.9					45.3333	15273.9
45.4667	3296.07				45.4667	12645					45.4667	35103.6					45.4667	15145.9
45.6	3237.26				45.6	12505.5					45.6	34799.2					45.6	14947.2
45.7333	3236.16				45.7333	12288.3					45.7333	34606.2					45.7333	14726.5
45.8667	3221.73				45.8667	12088.3					45.8667	34721					45.8667	14414.2
46	3221.42				46	11848.2					46	34610					46	14262.9
46.1333	3247.65				46.1333	11687.8					46.1333	34599.6					46.1333	14223.5
46.2667	3254.14				46.2667	11664.9					46.2667	34691.2					46.2667	14116.5
46.4	3264.4				46.4	11557.8					46.4	34783.4					46.4	14025.7
46.5333	3273.31				46.5333	11417.7					46.5333	34623					46.5333	13815.3
46.6667	3226.24				46.6667	11244.2					46.6667	34129.3					46.6667	13591.6
46.8	3194.16				46.8	11081.4					46.8	33762.4					46.8	13275.6
46.9333	3182.44				46.9333	10824.9					46.9333	33125.4					46.9333	13011.8
47.0667	3199.85				47.0667	10714.7					47.0667	32274.1					47.0667	12919
47.2	3170.65				47.2	10610.6					47.2	31299.7					47.2	12846.9
47.3333	3151.2				47.3333	10528.3					47.3333	30267.7					47.3333	12738.4
47.4667	3118.67				47.4667	10476.9					47.4667	29380					47.4667	12712.4
47.6	3092.33				47.6	10408.8					47.6	28665					47.6	12564.8
47.7333	3080.2				47.7333	10366.6					47.7333	27974.6					47.7333	12589.8
47.8667	3093.52				47.8667	10256.6					47.8667	27493.2					47.8667	12594.7
48	3121.56				48	10261.3					48	26910.5					48	12460.8
48.1333	3130.12				48.1333	10212.2					48.1333	26473.3					48.1333	12399.3
48.2667	3116.55				48.2667	10100.1					48.2667	25878.5					48.2667	12230.9
48.4	3107.03				48.4	10053.3					48.4	25238.8					48.4	12216.7
48.5333	3115.75				48.5333	9925.05					48.5333	24596.7					48.5333	12160.4
48.6667	3084.39				48.6667	9893.63					48.6667	24281					48.6667	12054.9
48.8	3084.09				48.8	9797.3					48.8	24019.9					48.8	11894.4
48.9333	3040.85				48.9333	9728.59					48.9333	23698					48.9333	11806.5
49.0667	3038.72				49.0667	9731.06					49.0667	23534.7					49.0667	11789.6
49.2	3026.98				49.2	9651.02					49.2	23439.8					49.2	11710.4
49.3333	2985.01				49.3333	9650.16					49.3333	23384.5					49.3333	11729.2
49.4667	2991.84				49.4667	9741.05					49.4667	23259.1					49.4667	11743.4
49.6	2969.05				49.6	9816.14					49.6	23221					49.6	11886.8
49.7333	2939.2				49.7333	9989.37					49.7333	23198					49.7333	12156.5
49.8667	2945.96				49.8667	10219.3					49.8667	23117.4					49.8667	12320.9
50	2928.55				50	10499					50	23265.7					50	12783.3
50.1333	2931.93				50.1333	10813.7					50.1333	23462.1					50.1333	13010.7
50.2667	2918.69				50.2667	11069.8					50.2667	23526.1					50.2667	13377.5
50.4	2923.57				50.4	11276.3					50.4	23501.1					50.4	13699.4
50.5333	2946.75				50.5333	11487.3					50.5333	23268.9					50.5333	13815
50.6667	2960.47				50.6667	11212.4					50.6667	22989.1					50.6667	13441.2
50.8	2948.54				50.8	10592.1					50.8	22885.2					50.8	12648.1
50.9333	2947.25				50.9333	9871.11					50.9333	23119.7					50.9333	11758.7
51.0667	2983.03				51.0667	9132.85					51.0667	23337.5					51.0667	10844.7
51.2	2984.85				51.2	8402.44					51.2	23697.4					51.2	9981.23
51.3333	3010.17				51.3333	7828.42					51.3333	23925.9					51.3333	9299.56
51.4667	3011.95				51.4667	7408.4					51.4667	24363.8					51.4667	8724.33
51.6	2993.42				51.6	7069.28					51.6	24697.4					51.6	8372.12
51.7333	3015.23				51.7333	6869.26					51.7333	25373.2					51.7333	8149.38
51.8667	2995.91				51.8667	6686.36					51.8667	25771.1					51.8667	7861.67
52	2970.69				52	6480.1					52	26233.5					52	7695.7
52.1333	2954.46				52.1333	6395.96					52.1333	26721.7					52.1333	7504.69
52.2667	2950.09				52.2667	6253.27					52.2667	27046.3					52.2667	7431.31
52.4	2930.05				52.4	6181.02					52.4	27037.5					52.4	7231.61
52.5333	2914.65				52.5333	6030.69					52.5333	26546.8					52.5333	7159.29
52.6667	2904.38				52.6667	5980.88					52.6667	25471.4					52.6667	7020.87
52.8	2900.65				52.8	5942.52					52.8	23655.3					52.8	6916.97
52.9333	2908.27				52.9333	5837					52.9333	21517.6					52.9333	6867.55
53.0667	2900.59				53.0667	5805.51					53.0667	19430.2					53.0667	6835.77
53.2	2932.03				53.2	5820.38					53.2	17561.2					53.2	6888.81
53.3333	2921.13				53.3333	5838.36					53.3333	16068.3					53.3333	6978.77
53.4667	2910.1				53.4667	5912.32					53.4667	14675.7					53.4667	7016.81
53.6	2895.23				53.6	6038.74					53.6	13577.4					53.6	7136.6
53.7333	2875.38				53.7333	6239.66					53.7333	12699.2					53.7333	7343.95
53.8667	2863.62				53.8667	6344.39					53.8667	12205.1					53.8667	7599.22
54	2848.75				54	6474.06					54	11793.3					54	7745.32
54.1333	2832.28				54.1333	6659.55					54.1333	11366.9					54.1333	8048.28
54.2667	2828.24				54.2667	6982.59					54.2667	11042.9					54.2667	8416.2
54.4	2815.3				54.4	7116.99					54.4	10626.4					54.4	8553.88
54.5333	2799.39				54.5333	6986.93					54.5333	9997.51					54.5333	8320.13
54.6667	2792.92				54.6667	6514.7					54.6667	9286.06					54.6667	7802.69
54.8	2776.69				54.8	6007.08					54.8	8822.87					54.8	7097.9
54.9333	2775.97				54.9333	5448.33					54.9333	8416.4					54.9333	6436.94
55.0667	2784.41				55.0667	5153.93					55.0667	8156.28					55.0667	6019.65
55.2	2785.57				55.2	4935.91					55.2	7924.93					55.2	5708.63
55.3333	2772.51				55.3333	4732.71					55.3333	7818.07					55.3333	5492.61
55.4667	2767.55				55.4667	4569.05					55.4667	7722.25					55.4667	5272.14
55.6	2783.23				55.6	4364.61					55.6	7713.32					55.6	5011.11
55.7333	2732.99				55.7333	4166.61					55.7333	7643.61					55.7333	4794.56
55.8667	2720.33				55.8667	4063.02					55.8667	7649.24					55.8667	4635.1
56	2747.45				56	3942.96					56	7640.62					56	4517.29
56.1333	2751.75				56.1333	3882.96					56.1333	7523.75					56.1333	4400.17
56.2667	2769.65				56.2667	3814.77					56.2667	7405.89					56.2667	4351.41
56.4	2767.42				56.4	3770.23					56.4	7224.33					56.4	4300.08
56.5333	2753.98				56.5333	3724.05					56.5333	6988.62					56.5333	4237.31
56.6667	2727.61				56.6667	3723.5					56.6667	6781.18					56.6667	4188.79
56.8	2730.07				56.8	3730.36					56.8	6556.81					56.8	4212.7
56.9333	2740.21				56.9333	3691.16					56.9333	6338.81					56.9333	4204.82
57.0667	2751.44				57.0667	3706.1					57.0667	6182.97					57.0667	4175.77
57.2	2776.63				57.2	3698.38					57.2	6033.56					57.2	4209.02
57.3333	2755.76				57.3333	3690.93					57.3333	5883.06					57.3333	4204.75
57.4667	2762.76				57.4667	3726.45					57.4667	5762.56					57.4667	4236.55
57.6	2769.54				57.6	3742.85					57.6	5704.64					57.6	4231.16
57.7333	2767.26				57.7333	3741.74					57.7333	5568.87					57.7333	4302.01
57.8667	2749.85				57.8667	3787.13					57.8667	5494.21					57.8667	4299.22
58	2743.73				58	3827.07					58	5419.95					58	4366.13
58.1333	2756.06				58.1333	3837.44					58.1333	5327.43					58.1333	4406.87
58.2667	2751.76				58.2667	3833.71					58.2667	5212.09					58.2667	4358.44
58.4	2748.48				58.4	3816.39					58.4	5064.16					58.4	4360.87
58.5333	2724.21				58.5333	3800.3					58.5333	4952.42					58.5333	4305.78
58.6667	2749.3				58.6667	3728.17					58.6667	4874.9					58.6667	4203.99
58.8	2756.4				58.8	3681.65					58.8	4713.17					58.8	4173.82
58.9333	2746.8				58.9333	3683.53					58.9333	4621.4					58.9333	4152.68
59.0667	2782.72				59.0667	3698.42					59.0667	4514.09					59.0667	4160.37
59.2	2776.64				59.2	3689.02					59.2	4414.93					59.2	4155.3
59.3333	2800.18				59.3333	3716.08					59.3333	4327.33					59.3333	4176.76
59.4667	2811.45				59.4667	3684.12					59.4667	4267.33					59.4667	4183.77
59.6	2807.59				59.6	3735.69					59.6	4253.94					59.6	4226.3
59.7333	2816.84				59.7333	3778.76					59.7333	4155.35					59.7333	4322.93
59.8667	2790.34				59.8667	3887.19					59.8667	4082.07					59.8667	4404.69
60	2791.64				60	3938.78					60	3986.84					60	4504.75
60.1333	2808.8				60.1333	4016.8					60.1333	3950.21					60.1333	4566.89
60.2667	2793.55				60.2667	4044.22					60.2667	3914.69					60.2667	4625.02
60.4	2807.73				60.4	4129.75					60.4	3905.93					60.4	4770.27
60.5333	2803.78				60.5333	4171.29					60.5333	3863.29					60.5333	4790.12
60.6667	2842.64				60.6667	4134.02					60.6667	3759.17					60.6667	4712.73
60.8	2841.77				60.8	4002.38					60.8	3691.58					60.8	4551.11
60.9333	2846.49				60.9333	3867.5					60.9333	3609.61					60.9333	4418.9
61.0667	2852.51				61.0667	3767.19					61.0667	3532.28					61.0667	4272.03
61.2	2828.33				61.2	3677.48					61.2	3441.78					61.2	4128.09
61.3333	2835.44				61.3333	3585.01					61.3333	3407.43					61.3333	4036.32
61.4667	2811.6				61.4667	3468.68					61.4667	3340.58					61.4667	3916.56
61.6	2831.94				61.6	3436.92					61.6	3295.02					61.6	3813.7
61.7333	2790.9				61.7333	3407.3					61.7333	3276.76					61.7333	3801.74
61.8667	2789.42				61.8667	3398.32					61.8667	3242.66					61.8667	3814.98
62	2772.18				62	3405.72					62	3168.4					62	3804.17
62.1333	2790.47				62.1333	3402.57					62.1333	3130.72					62.1333	3782.43
62.2667	2803.11				62.2667	3430.15					62.2667	3042.89					62.2667	3837.68
62.4	2802.07				62.4	3423.92					62.4	2923.16					62.4	3832.99
62.5333	2825.37				62.5333	3429.87					62.5333	2888.74					62.5333	3849.69
62.6667	2827.03				62.6667	3410.99					62.6667	2821.21					62.6667	3816.77
62.8	2818.78				62.8	3382.35					62.8	2771.85					62.8	3767.39
62.9333	2789.46				62.9333	3358.9					62.9333	2730.14					62.9333	3738.94
63.0667	2815.44				63.0667	3325.58					63.0667	2701.88					63.0667	3724.67
63.2	2801.1				63.2	3333.83					63.2	2694.91					63.2	3711.2
63.3333	2810.36				63.3333	3332.12					63.3333	2700.47					63.3333	3721.74
63.4667	2793.78				63.4667	3364.44					63.4667	2696.24					63.4667	3758.39
63.6	2778.45				63.6	3389.14					63.6	2657.45					63.6	3797.36
63.7333	2790.41				63.7333	3390.78					63.7333	2647.37					63.7333	3826.25
63.8667	2780.72				63.8667	3395.34					63.8667	2627.1					63.8667	3787.29
64	2796.99				64	3396.31					64	2591.54					64	3816.32
64.1333	2804.6				64.1333	3415.68					64.1333	2609.19					64.1333	3794.92
64.2667	2814.59				64.2667	3366.19					64.2667	2601.54					64.2667	3786.61
64.4	2810.33				64.4	3379.92					64.4	2596.18					64.4	3767.35
64.5333	2809.1				64.5333	3414.17					64.5333	2606.47					64.5333	3787.4
64.6667	2813.28				64.6667	3379.86					64.6667	2608.53					64.6667	3802.28
64.8	2793.01				64.8	3344.35					64.8	2594.34					64.8	3760.57
64.9333	2781.35				64.9333	3321.6					64.9333	2570.52					64.9333	3703.17
65.0667	2796.97				65.0667	3288.19					65.0667	2566.26					65.0667	3667.53
65.2	2779.58				65.2	3268.99					65.2	2539.54					65.2	3650.45
65.3333	2778.9				65.3333	3244.42					65.3333	2526.22					65.3333	3610.4
65.4667	2771.48				65.4667	3235.99					65.4667	2495.97					65.4667	3613.11
65.6	2783.4				65.6	3258.96					65.6	2490.91					65.6	3607.68
65.7333	2811.38				65.7333	3310.37					65.7333	2488.77					65.7333	3700.92
65.8667	2807.82				65.8667	3297.75					65.8667	2467.46					65.8667	3724.82
66	2837.41				66	3337.63					66	2423.55					66	3767.06
66.1333	2822.74				66.1333	3322.94					66.1333	2387.27					66.1333	3712.01
66.2667	2817.55				66.2667	3317.4					66.2667	2359.86					66.2667	3720.18
66.4	2807.25				66.4	3315.31					66.4	2345.35					66.4	3720.17
66.5333	2839.79				66.5333	3306.18					66.5333	2335.63					66.5333	3702.51
66.6667	2833.99				66.6667	3305.01					66.6667	2324.83					66.6667	3692.56
66.8	2864.83				66.8	3322.9					66.8	2340.76					66.8	3747.28
66.9333	2899.91				66.9333	3363.54					66.9333	2341.28					66.9333	3767.3
67.0667	2867.58				67.0667	3381.48					67.0667	2323.87					67.0667	3757.59
67.2	2918.78				67.2	3360.82					67.2	2332.05					67.2	3773.36
67.3333	2918.63				67.3333	3426.06					67.3333	2319.32					67.3333	3813.43
67.4667	2930.7				67.4667	3451.49					67.4667	2316.42					67.4667	3818.79
67.6	2921.77				67.6	3439.82					67.6	2330.68					67.6	3829.62
67.7333	2917.03				67.7333	3407.95					67.7333	2325.49					67.7333	3814.97
67.8667	2940.07				67.8667	3361.3					67.8667	2335.54					67.8667	3762.83
68	2971.89				68	3384.02					68	2337.53					68	3731.98
68.1333	2944.41				68.1333	3360.03					68.1333	2340.3					68.1333	3804.22
Sum	2.32016e+06				Sum	4.36821e+06					Sum	6.50139e+06					Sum	5.00976e+06		Average	4.54988e+06		WT Average	5.00009e+06
Normalized to WT Average	0.464023				Normalized to WT Average	0.873626					Normalized to WT Average	1.30025					Normalized to WT Average	1.00193		Normalized to WT Average	0.909959
