# Supplementary material for: TUBA1A tubulinopathy mutants disrupt neuron morphogenesis and override XMAP215/Stu2 regulation of microtubule dynamics
Source: eLife. 2022 May 5;11:e76189. doi: 10.7554/eLife.76189 (PMC9236607; doi:10.7554/eLife.76189)
Supplement: Figure 1—source data 2. [file elife-76189-fig1-data2.xlsx]

## Sheet: 3.26.19 V409A
Line width = 300
VA A2		0-33	0-255
Normalized cortex length	Distance (µm)	GFP Fluorescence Intensity	DAPI Fluorescence Intensity	GFP Fluorescence Intensity AVG	Normalized
0	0	4.2945	22.4426	12.0357	0.501401
0.000520753	0.291	4.2508	22.3874	5.61976	0.234116
0.00103972	0.581	4.2424	22.2774	3.48653	0.145247
0.00156047	0.872	4.3308	22.6188	2.8622	0.119237				Follow this for normalizing length data:
0.00207943	1.162	4.3035	22.6168	24.0042	1
0.00260019	1.453	4.2352	22.4734
0.00312094	1.744	4.1513	22.1168
0.0036399	2.034	4.2055	22.0802
0.00416066	2.325	4.0229	21.7117
0.00467962	2.615	3.9913	21.8734
0.00520037	2.906	3.8601	21.8601
0.00571934	3.196	3.7805	21.6898
0.00624009	3.487	3.6355	21.9345
0.00676084	3.778	3.6756	22.1841
0.00727981	4.068	3.8926	21.8931
0.00780056	4.359	4.0931	21.7313
0.00831952	4.649	4.2587	21.9766
0.00884028	4.94	4.6015	21.8434
0.00936103	5.231	4.8746	21.8579
0.00987999	5.521	5.107	21.8233
0.0104007	5.812	5.2675	21.4042
0.0109197	6.102	5.2707	22.0512
0.0114405	6.393	5.4274	22.4792
0.0119612	6.684	5.5147	21.8178
0.0124802	6.974	5.4939	21.8034
0.0130009	7.265	5.4166	21.8224
0.0135199	7.555	5.3355	22.185
0.0140407	7.846	5.2359	22.2704
0.0145614	8.137	5.1538	21.7447
0.0150804	8.427	5.1213	22.2245
0.0156011	8.718	5.1569	22.4869
0.0161201	9.008	5.1828	22.2927
0.0166408	9.299	5.3561	22.3805
0.0171598	9.589	5.4561	22.3474
0.0176806	9.88	5.7072	22.1818
0.0182013	10.171	6.0119	22.5308
0.0187203	10.461	6.5126	22.7364
0.019241	10.752	6.8888	22.6716
0.01976	11.042	7.2683	22.4938
0.0202807	11.333	7.4928	22.9033
0.0208015	11.624	7.853	22.786
0.0213205	11.914	8.4167	23.2426
0.0218412	12.205	8.9377	23.5701
0.0223602	12.495	9.0972	23.3738
0.0228809	12.786	8.9173	23.6581
0.0234017	13.077	8.4875	23.04
0.0239206	13.367	7.6999	22.744
0.0244414	13.658	7.0292	22.9229
0.0249604	13.948	6.9578	22.7376
0.0254811	14.239	7.0489	23.038
0.0260019	14.53	7.5939	23.5712
0.0265208	14.82	8.2874	23.7466
0.0270416	15.111	9.2212	23.8611
0.0275605	15.401	10.3927	24.2892
0.0280813	15.692	12.1562	24.9736
0.0286003	15.982	13.6621	25.2981
0.029121	16.273	14.3207	25.237
0.0296418	16.564	14.885	25.5858
0.0301607	16.854	15.6535	26.5327
0.0306815	17.145	16.8927	26.7367
0.0312005	17.435	18.8398	27.0029
0.0317212	17.726	21.1461	28.0747
0.032242	18.017	23.5625	28.1207
0.0327609	18.307	25.6636	28.9748
0.0332817	18.598	27.3556	30.1238
0.0338006	18.888	29.5017	30.2614
0.0343214	19.179	30.5825	30.606
0.0348421	19.47	30.9199	31.2526
0.0353611	19.76	31.0276	30.6649
0.0358819	20.051	30.7547	30.88
0.0364008	20.341	29.6512	30.9101
0.0369216	20.632	28.3617	30.3772
0.0374423	20.923	26.5006	29.0959
0.0379613	21.213	24.2314	29.0076
0.038482	21.504	22.5884	28.5946
0.039001	21.794	21.2847	27.8331
0.0395218	22.085	20.1117	27.7275
0.0400407	22.375	19.3841	27.4384
0.0405615	22.666	18.6146	27.4013
0.0410822	22.957	17.6509	26.5994
0.0416012	23.247	16.6354	25.8614
0.042122	23.538	15.4312	25.5812
0.0426409	23.828	14.3986	25.172
0.0431617	24.119	13.1452	24.6213
0.0436824	24.41	11.6285	24.0462
0.0442014	24.7	9.8439	23.3419
0.0447221	24.991	8.3047	22.9455
0.0452411	25.281	7.4563	22.5481
0.0457619	25.572	6.943	21.3789
0.0462826	25.863	6.4667	21.591
0.0468016	26.153	6.1433	21.9713
0.0473223	26.444	5.8333	21.5999
0.0478413	26.734	5.6377	21.4433
0.048362	27.025	5.3413	21.4261
0.0488828	27.316	5.2989	21.544
0.0494018	27.606	5.3411	21.465
0.0499225	27.897	5.3077	21.2332
0.0504415	28.187	5.3867	20.9885
0.0509622	28.478	5.4677	21.4963
0.0514812	28.768	5.3616	21.4507
0.0520019	29.059	5.5627	21.452
0.0525227	29.35	5.6972	21.0488
0.0530417	29.64	5.7472	21.5471
0.0535624	29.931	5.9704	22.0126
0.0540814	30.221	6.7058	22.2869
0.0546021	30.512	7.6725	22.985
0.0551229	30.803	8.7542	22.8825
0.0556419	31.093	9.8	23.769
0.0561626	31.384	10.6203	24.377
0.0566816	31.674	11.3179	24.4911
0.0572023	31.965	12.0769	25.0075
0.0577231	32.256	13.0729	25.6876
0.058242	32.546	14.0042	25.5589
0.0587628	32.837	14.3323	25.2041
0.0592818	33.127	14.098	25.6513
0.0598025	33.418	13.6167	25.8149
0.0603233	33.709	13.704	25.675
0.0608422	33.999	13.7624	26.0129
0.061363	34.29	14.1835	26.0196
0.0618819	34.58	14.8845	26.0338
0.0624027	34.871	15.9246	26.7231
0.0629217	35.161	17.5978	27.596
0.0634424	35.452	19.1712	27.9668
0.0639632	35.743	20.4004	28.0322
0.0644821	36.033	21.8268	28.6228
0.0650029	36.324	22.6364	28.5901
0.0655218	36.614	23.0956	28.3445
0.0660426	36.905	23.2166	28.3111
0.0665634	37.196	22.7929	28.2565
0.0670823	37.486	22.7674	28.1536
0.0676031	37.777	22.0894	27.6872
0.068122	38.067	21.1927	27.6432
0.0686428	38.358	20.2291	27.0603
0.0691635	38.649	19.287	26.8015
0.0696825	38.939	17.7722	26.4979
0.0702033	39.23	16.5267	25.8172
0.0707222	39.52	15.1137	25.4077
0.071243	39.811	13.8592	24.7187
0.0717637	40.102	12.4716	25.2126
0.0722827	40.392	11.3111	24.7077
0.0728034	40.683	10.1322	23.9388
0.0733224	40.973	9.2927	23.3904
0.0738432	41.264	8.5808	23.8096
0.0743621	41.554	7.9989	23.4225
0.0748829	41.845	7.6357	23.1194
0.0754036	42.136	7.2894	23.0498
0.0759226	42.426	6.9975	22.7881
0.0764433	42.717	6.917	23.0791
0.0769623	43.007	6.9787	22.5266
0.0774831	43.298	6.9596	22.4781
0.0780038	43.589	7.169	22.2161
0.0785228	43.879	7.0152	22.048
0.0790435	44.17	6.9158	22.6755
0.0795625	44.46	6.8891	22.4446
0.0800832	44.751	6.8162	21.9825
0.080604	45.042	6.8316	21.909
0.081123	45.332	6.6287	21.6372
0.0816437	45.623	6.6826	21.3598
0.0821627	45.913	6.5764	21.7077
0.0826834	46.204	6.3746	21.6553
0.0832042	46.495	6.3726	21.2098
0.0837232	46.785	6.2147	21.3942
0.0842439	47.076	5.9597	21.6574
0.0847629	47.366	5.7617	21.966
0.0852836	47.657	5.7611	21.9947
0.0858026	47.947	5.7331	21.7808
0.0863233	48.238	5.6302	22.5749
0.0868441	48.529	5.7037	22.2668
0.0873631	48.819	5.7072	22.2113
0.0878838	49.11	5.6922	22.2773
0.0884028	49.4	5.773	21.9812
0.0889235	49.691	5.7638	22.115
0.0894443	49.982	5.7415	22.868
0.0899632	50.272	5.7414	22.3627
0.090484	50.563	5.8596	22.5581
0.091003	50.853	5.9793	22.1436
0.0915237	51.144	6.009	22.8075
0.0920445	51.435	6.1342	22.9379
0.0925634	51.725	6.2862	22.825
0.0930842	52.016	6.4625	22.8827
0.0936031	52.306	6.5701	23.3826
0.0941239	52.597	6.8845	23.2278
0.0946447	52.888	7.1316	23.6346
0.0951636	53.178	7.445	24.0288
0.0956844	53.469	7.4983	24.0534
0.0962033	53.759	7.7238	24.3007
0.0967241	54.05	7.8347	24.2891
0.0972431	54.34	8.0422	24.0821
0.0977638	54.631	8.1389	24.2757
0.0982846	54.922	8.3099	24.4754
0.0988035	55.212	8.3472	24.8372
0.0993243	55.503	8.4447	24.7031
0.0998432	55.793	8.4802	24.384
0.100364	56.084	8.7866	24.9415
0.100885	56.375	9.0003	24.5685
0.101404	56.665	9.1783	24.9068
0.101924	56.956	9.3803	25.5108
0.102443	57.246	9.4979	25.1086
0.102964	57.537	9.6199	25.6602
0.103485	57.828	9.8628	25.2236
0.104004	58.118	10.0037	25.4681
0.104525	58.409	10.2968	25.2841
0.105044	58.699	10.4754	25.4026
0.105564	58.99	10.7089	25.3892
0.106083	59.28	10.8321	25.0342
0.106604	59.571	10.8649	25.9644
0.107125	59.862	11.0056	26.7263
0.107644	60.152	10.997	26.1948
0.108165	60.443	10.8756	26.5123
0.108684	60.733	10.6519	26.6127
0.109204	61.024	10.4537	26.2495
0.109725	61.315	10.356	25.2508
0.110244	61.605	10.3474	25.0999
0.110765	61.896	10.3729	25.4492
0.111284	62.186	10.4453	25.5857
0.111804	62.477	10.9276	26.0172
0.112325	62.768	11.942	26.6405
0.112844	63.058	13.1549	26.6244
0.113365	63.349	14.2205	26.7464
0.113884	63.639	15.3272	27.8649
0.114405	63.93	16.2188	27.3112
0.114925	64.221	17.2205	27.8086
0.115444	64.511	18.3601	28.0978
0.115965	64.802	19.3636	28.381
0.116484	65.092	20.2931	28.6014
0.117005	65.383	21.4591	28.6952
0.117524	65.673	21.9762	29.0454
0.118045	65.964	21.7503	28.6291
0.118565	66.255	21.5719	28.7016
0.119084	66.545	20.7069	27.8314
0.119605	66.836	20.2315	28.0162
0.120124	67.126	19.7095	27.4083
0.120645	67.417	19.5235	27.2741
0.121165	67.708	20.1049	27.7768
0.121684	67.998	20.9666	28.1954
0.122205	68.289	22.2287	28.5674
0.122724	68.579	23.9117	28.4044
0.123245	68.87	26.1432	29.1647
0.123766	69.161	28.4089	30.2218
0.124285	69.451	30.3385	31.6137
0.124805	69.742	31.3015	31.1687
0.125324	70.032	31.0351	30.0783
0.125845	70.323	29.5026	28.8221
0.126366	70.614	26.2949	28.5496
0.126885	70.904	22.8704	27.3781
0.127406	71.195	19.8293	26.6661
0.127925	71.485	17.6157	26.2469
0.128445	71.776	16.542	26.3822
0.128964	72.066	15.8979	26.5068
0.129485	72.357	15.5493	26.7998
0.130006	72.648	15.0753	25.9612
0.130525	72.938	14.3315	25.3012
0.131045	73.229	13.1613	24.8844
0.131564	73.519	11.9495	24.0946
0.132085	73.81	10.7188	23.5309
0.132606	74.101	9.8786	23.9704
0.133125	74.391	9.3921	24.3067
0.133646	74.682	9.348	23.8924
0.134165	74.972	9.3515	23.807
0.134685	75.263	9.1874	23.5632
0.135206	75.554	9.143	23.7804
0.135725	75.844	9.1803	23.5274
0.136246	76.135	9.1465	24.2264
0.136765	76.425	9.1784	23.925
0.137286	76.716	9.0042	23.7803
0.137806	77.007	9.18	23.9446
0.138325	77.297	9.266	24.3729
0.138846	77.588	9.4304	24.3378
0.139365	77.878	9.8653	24.7129
0.139886	78.169	10.317	24.7098
0.140405	78.459	10.7846	25.4487
0.140925	78.75	11.5539	25.866
0.141446	79.041	12.3539	25.8121
0.141965	79.331	13.0827	25.9618
0.142486	79.622	13.5828	26.1105
0.143005	79.912	14.0171	25.9764
0.143526	80.203	14.6387	26.2125
0.144046	80.494	15.0631	26.7041
0.144565	80.784	15.3049	26.5538
0.145086	81.075	15.5596	26.3311
0.145605	81.365	15.795	26.6732
0.146126	81.656	16.1117	26.1003
0.146647	81.947	16.2664	26.412
0.147166	82.237	15.6408	26.4695
0.147686	82.528	15.3738	25.7724
0.148205	82.818	14.6136	25.8031
0.148726	83.109	13.834	25.2852
0.149247	83.4	13.0598	25.1934
0.149766	83.69	12.4224	25.2601
0.150287	83.981	11.8598	24.5309
0.150805	84.271	11.422	24.5926
0.151326	84.562	11.4168	25.2212
0.151845	84.852	11.3351	24.9633
0.152366	85.143	11.5814	24.8758
0.152887	85.434	11.7954	24.8895
0.153406	85.724	11.8376	25.1616
0.153926	86.015	12.1012	25.2366
0.154445	86.305	12.194	25.555
0.154966	86.596	12.1422	25.0334
0.155487	86.887	12.2115	24.9459
0.156006	87.177	12.2085	25.5285
0.156527	87.468	12.3358	25.2923
0.157046	87.758	12.7269	26.158
0.157566	88.049	13.3174	25.9537
0.158087	88.34	13.9337	26.1347
0.158606	88.63	13.9142	25.8134
0.159127	88.921	13.7244	25.7216
0.159646	89.211	13.5877	25.1331
0.160166	89.502	13.4872	25.7406
0.160687	89.793	13.2849	25.7371
0.161206	90.083	13.474	25.5269
0.161727	90.374	13.4682	25.3972
0.162246	90.664	13.4576	25.6861
0.162767	90.955	13.561	25.2634
0.163286	91.245	13.0934	25.3889
0.163806	91.536	12.9288	25.7379
0.164327	91.827	12.6593	25.5675
0.164846	92.117	12.4793	25.7495
0.165367	92.408	12.6624	25.8089
0.165886	92.698	12.7258	26.0634
0.166407	92.989	12.5825	26.1286
0.166927	93.28	12.7135	26.2584
0.167446	93.57	12.3601	26.2427
0.167967	93.861	12.1437	25.4874
0.168486	94.151	11.8342	25.8544
0.169007	94.442	11.4872	25.2034
0.169528	94.733	11.2156	25.1855
0.170046	95.023	11.2549	25.1433
0.170567	95.314	11.3032	24.8768
0.171086	95.604	11.4089	25.1958
0.171607	95.895	11.3372	25.4523
0.172128	96.186	11.6391	25.5124
0.172647	96.476	11.5742	25.1879
0.173167	96.767	11.515	25.2318
0.173686	97.057	11.6307	24.9863
0.174207	97.348	11.6632	24.9424
0.174726	97.638	11.8672	25.1004
0.175247	97.929	12.3466	24.6842
0.175768	98.22	12.6861	25.3984
0.176287	98.51	13.079	25.6017
0.176807	98.801	13.3097	25.6471
0.177326	99.091	13.4575	26.4306
0.177847	99.382	13.321	25.6723
0.178368	99.673	13.2515	25.5353
0.178887	99.963	13.2587	25.0444
0.179408	100.254	13.2075	25.3768
0.179926	100.544	13.3337	25.557
0.180447	100.835	13.6231	25.7013
0.180968	101.126	14.0531	25.861
0.181487	101.416	14.6374	26.6819
0.182008	101.707	15.3307	26.9486
0.182527	101.997	15.594	27.0931
0.183047	102.288	15.3651	27.2737
0.183568	102.579	15.6225	26.9353
0.184087	102.869	15.4213	27.2006
0.184608	103.16	15.3561	27.0674
0.185127	103.45	15.4482	27.7761
0.185648	103.741	15.5653	27.0034
0.186167	104.031	15.8279	27.0359
0.186687	104.322	16.0967	26.9892
0.187208	104.613	16.3732	26.6675
0.187727	104.903	16.8535	27.0682
0.188248	105.194	17.0083	26.8784
0.188767	105.484	17.3454	26.3924
0.189288	105.775	17.1563	26.7258
0.189808	106.066	16.7089	27.0734
0.190327	106.356	16.6615	26.3003
0.190848	106.647	16.133	26.7237
0.191367	106.937	15.4392	26.3703
0.191888	107.228	14.4181	25.6358
0.192408	107.519	14.2665	25.8992
0.192927	107.809	13.9941	25.7322
0.193448	108.1	13.5208	25.5557
0.193967	108.39	12.996	25.3589
0.194488	108.681	12.5589	25.8225
0.195009	108.972	12.1003	25.6337
0.195528	109.262	11.8324	25.4784
0.196048	109.553	11.9964	24.6876
0.196567	109.843	12.0577	25.2107
0.197088	110.134	12.3124	25.8163
0.197607	110.424	12.4758	26.4414
0.198128	110.715	12.8108	25.998
0.198649	111.006	13.0489	25.8357
0.199168	111.296	13.3149	25.5351
0.199688	111.587	13.38	25.9139
0.200207	111.877	13.639	25.4724
0.200728	112.168	13.7423	26.0046
0.201249	112.459	13.8121	25.8662
0.201768	112.749	13.9314	25.7784
0.202288	113.04	13.9843	25.5768
0.202807	113.33	13.7969	25.2101
0.203328	113.621	13.3486	25.5272
0.203849	113.912	13.0895	26.8247
0.204368	114.202	12.8128	25.989
0.204889	114.493	12.4135	25.0938
0.205408	114.783	12.4075	25.1974
0.205928	115.074	12.2949	24.8978
0.206447	115.364	12.0462	25.483
0.206968	115.655	12.2299	26.0527
0.207489	115.946	12.4253	25.3991
0.208008	116.236	12.1993	25.7671
0.208529	116.527	12.1185	25.1818
0.209048	116.817	12.1175	25.6575
0.209568	117.108	12.0865	25.7477
0.210089	117.399	12.0966	25.8838
0.210608	117.689	12.2218	26.0355
0.211129	117.98	12.4276	25.7291
0.211648	118.27	12.6157	26.1352
0.212168	118.561	12.8364	25.5227
0.212689	118.852	13.012	25.9689
0.213208	119.142	13.0406	25.8115
0.213729	119.433	13.4041	25.9661
0.214248	119.723	13.4704	26.3413
0.214769	120.014	13.6914	26.2849
0.215289	120.305	13.9771	26.7024
0.215808	120.595	13.9656	26.0468
0.216329	120.886	14.0513	26.1011
0.216848	121.176	13.8769	25.9961
0.217369	121.467	14.0637	25.0209
0.217888	121.757	13.9395	25.9513
0.218409	122.048	13.9157	25.6677
0.218929	122.339	13.8454	25.1355
0.219448	122.629	13.8551	25.4963
0.219969	122.92	13.7176	25.3736
0.220488	123.21	13.2319	25.6458
0.221009	123.501	12.6894	25.2827
0.221529	123.792	12.1728	24.8049
0.222048	124.082	11.6391	24.328
0.222569	124.373	11.1484	23.6122
0.223088	124.663	10.5764	23.5875
0.223609	124.954	10.2164	24.1972
0.22413	125.245	9.8893	23.6395
0.224649	125.535	9.7143	23.5866
0.225169	125.826	9.5639	23.7292
0.225688	126.116	9.7423	23.8617
0.226209	126.407	9.6602	24.0013
0.22673	126.698	9.7256	24.0712
0.227249	126.988	9.7543	23.3163
0.22777	127.279	10.1074	23.8044
0.228289	127.569	10.1619	24.0798
0.228809	127.86	10.0954	24.2301
0.229328	128.15	10.2968	23.9037
0.229849	128.441	10.3643	24.275
0.23037	128.732	10.4027	24.1696
0.230889	129.022	10.1827	24.076
0.231409	129.313	10.1824	23.603
0.231928	129.603	10.0717	23.8002
0.232449	129.894	10.0323	23.9409
0.23297	130.185	9.8985	23.791
0.233489	130.475	9.515	23.455
0.23401	130.766	9.498	24.1216
0.234529	131.056	9.1054	23.7007
0.235049	131.347	8.9517	23.7531
0.23557	131.638	8.8182	23.8278
0.236089	131.928	8.7116	24.0254
0.23661	132.219	8.7	23.9433
0.237129	132.509	8.7096	23.5267
0.23765	132.8	8.7708	23.3883
0.23817	133.091	8.8028	23.3405
0.238689	133.381	8.7217	24.0667
0.23921	133.672	8.9461	23.8565
0.239729	133.962	8.9959	23.6449
0.24025	134.253	9.1443	23.9726
0.240769	134.543	9.2456	23.8072
0.241289	134.834	9.3518	24.0264
0.24181	135.125	9.341	23.7269
0.242329	135.415	9.4315	23.5214
0.24285	135.706	9.2962	23.5256
0.243369	135.996	9.2509	23.4804
0.24389	136.287	9.1042	23.521
0.24441	136.578	9.0813	23.8946
0.244929	136.868	9.0632	23.4849
0.24545	137.159	9.1319	23.9957
0.245969	137.449	9.0717	23.1611
0.24649	137.74	9.3124	23.6912
0.247011	138.031	9.1248	23.8837
0.24753	138.321	9.068	23.8536
0.24805	138.612	9.1022	24.3484
0.248569	138.902	8.9473	23.4923
0.24909	139.193	8.7548	23.1393
0.249611	139.484	8.6086	23.0393
0.25013	139.774	8.4857	23.691
0.25065	140.065	8.3656	23.6666
0.251169	140.355	8.3618	24.472
0.25169	140.646	8.413	24.0807
0.252209	140.936	8.4909	23.8692
0.25273	141.227	8.4092	24.1938
0.253251	141.518	8.3662	24.051
0.25377	141.808	8.5384	24.2646
0.25429	142.099	8.7277	24.1339
0.254809	142.389	8.6947	23.9533
0.25533	142.68	8.7198	24.0149
0.255851	142.971	8.7859	23.8332
0.25637	143.261	8.7653	23.8659
0.256891	143.552	8.7083	24.1179
0.25741	143.842	8.631	23.8835
0.25793	144.133	8.6404	24.184
0.258451	144.424	8.6494	24.6443
0.25897	144.714	8.6849	24.1834
0.259491	145.005	8.8865	23.9639
0.26001	145.295	8.868	23.7933
0.26053	145.586	8.9655	23.7405
0.261051	145.877	8.9873	24.3063
0.26157	146.167	9.1531	24.0734
0.262091	146.458	9.1722	23.4286
0.26261	146.748	9.1164	23.5503
0.263131	147.039	9.1681	23.6665
0.26365	147.329	9.0764	24.4585
0.26417	147.62	8.924	24.4687
0.264691	147.911	8.9271	24.3239
0.26521	148.201	8.9473	24.1653
0.265731	148.492	8.9434	24.2187
0.26625	148.782	8.7172	24.0958
0.266771	149.073	8.891	24.2147
0.267291	149.364	8.9215	24.1149
0.26781	149.654	9.1017	24.601
0.268331	149.945	9.2124	24.6162
0.26885	150.235	9.3762	24.5823
0.269371	150.526	9.5512	24.5011
0.269892	150.817	9.8198	24.3655
0.27041	151.107	9.7968	24.129
0.270931	151.398	9.7736	23.872
0.27145	151.688	9.5882	23.7812
0.271971	151.979	9.4799	23.5327
0.272492	152.27	9.3907	23.4889
0.273011	152.56	9.6905	24.067
0.273531	152.851	9.5776	23.9809
0.27405	153.141	9.5576	23.3296
0.274571	153.432	9.6105	23.4417
0.27509	153.722	9.6761	23.6891
0.275611	154.013	9.6627	23.5556
0.276132	154.304	9.7209	23.6244
0.276651	154.594	9.664	23.3362
0.277171	154.885	9.7076	23.4148
0.27769	155.175	9.8972	23.2855
0.278211	155.466	9.9138	23.6838
0.278732	155.757	9.8624	23.6231
0.279251	156.047	9.8868	23.3508
0.279772	156.338	9.8124	23.1098
0.28029	156.628	9.7138	23.332
0.280811	156.919	9.6876	23.3666
0.281332	157.21	9.646	23.3392
0.281851	157.5	9.7524	23.5445
0.282372	157.791	9.771	23.6191
0.282891	158.081	9.7458	22.9894
0.283411	158.372	9.574	23.1201
0.283932	158.663	9.361	23.4519
0.284451	158.953	9.0004	23.2986
0.284972	159.244	8.6884	23.1498
0.285491	159.534	8.3973	23.5509
0.286012	159.825	8.0434	23.2074
0.286531	160.115	7.9008	23.3539
0.287051	160.406	7.6497	23.8143
0.287572	160.697	7.5314	24.2086
0.288091	160.987	7.3891	23.9912
0.288612	161.278	7.4225	24.0583
0.289131	161.568	7.3868	24.003
0.289652	161.859	7.3816	23.8743
0.290172	162.15	7.4565	23.7868
0.290691	162.44	7.3721	23.8962
0.291212	162.731	7.363	23.4179
0.291731	163.021	7.4267	24.067
0.292252	163.312	7.522	23.7366
0.292772	163.603	7.4253	23.3997
0.293291	163.893	7.4662	23.1145
0.293812	164.184	7.7143	23.7776
0.294331	164.474	7.6191	24.0115
0.294852	164.765	7.7516	23.2149
0.295371	165.055	8.0108	23.5179
0.295892	165.346	8.189	23.6022
0.296412	165.637	8.4171	23.761
0.296931	165.927	8.7147	23.748
0.297452	166.218	8.9011	23.1718
0.297971	166.508	8.7642	23.1833
0.298492	166.799	8.3769	23.2629
0.299013	167.09	7.9153	23.234
0.299532	167.38	7.7057	22.6969
0.300052	167.671	7.5452	22.7842
0.300571	167.961	7.2586	22.9419
0.301092	168.252	7.0225	22.7522
0.301613	168.543	6.6852	22.4905
0.302132	168.833	6.6305	21.978
0.302652	169.124	6.3913	22.5611
0.303171	169.414	6.4329	22.8297
0.303692	169.705	6.5038	22.4536
0.304213	169.996	6.5371	22.8345
0.304732	170.286	6.541	22.9447
0.305253	170.577	6.503	23.1934
0.305772	170.867	6.6239	23.5196
0.306292	171.158	6.5288	22.9509
0.306813	171.449	6.7731	22.7731
0.307332	171.739	6.7542	22.5959
0.307853	172.03	6.9036	22.6884
0.308372	172.32	6.7374	22.6583
0.308893	172.611	6.6854	22.9146
0.309411	172.901	6.4336	22.8781
0.309932	173.192	6.2913	22.7681
0.310453	173.483	6.1434	22.6135
0.310972	173.773	5.9855	22.8696
0.311493	174.064	5.8433	22.4675
0.312012	174.354	5.8322	22.1367
0.312532	174.645	5.8083	22.5822
0.313053	174.936	5.738	22.5624
0.313572	175.226	5.5552	22.5296
0.314093	175.517	5.6964	22.5796
0.314612	175.807	5.6475	22.4456
0.315133	176.098	5.6687	22.3838
0.315653	176.389	5.6489	22.5779
0.316172	176.679	5.5253	22.7333
0.316693	176.97	5.4923	23.2026
0.317212	177.26	5.4958	22.8155
0.317733	177.551	5.5127	22.7327
0.318252	177.841	5.436	22.6392
0.318773	178.132	5.4763	22.3657
0.319293	178.423	5.4967	22.4989
0.319812	178.713	5.4972	23.2807
0.320333	179.004	5.5242	22.4089
0.320852	179.294	5.6258	22.6929
0.321373	179.585	5.5574	22.4801
0.321893	179.876	5.5014	22.6577
0.322412	180.166	5.4278	22.3808
0.322933	180.457	5.5322	22.7317
0.323452	180.747	5.5194	23.1845
0.323973	181.038	5.4649	22.2448
0.324494	181.329	5.4808	22.5895
0.325013	181.619	5.4327	22.8725
0.325533	181.91	5.4513	22.8826
0.326052	182.2	5.4195	22.4416
0.326573	182.491	5.2527	22.6325
0.327094	182.782	5.2513	22.7484
0.327613	183.072	5.0574	22.2904
0.328134	183.363	4.8511	22.027
0.328653	183.653	4.7056	22.2673
0.329173	183.944	4.721	22.7085
0.329692	184.234	4.6808	22.203
0.330213	184.525	4.6612	21.6751
0.330734	184.816	4.7065	22.0293
0.331253	185.106	4.5396	22.4446
0.331773	185.397	4.5969	22.2619
0.332292	185.687	4.5383	22.2117
0.332813	185.978	4.5502	22.4387
0.333334	186.269	4.5722	22.0646
0.333853	186.559	4.5871	22.1148
0.334374	186.85	4.6084	22.1219
0.334893	187.14	4.6433	22.6704
0.335413	187.431	4.5707	22.4544
0.335934	187.722	4.496	22.151
0.336453	188.012	4.5179	22.4364
0.336974	188.303	4.4841	22.2843
0.337493	188.593	4.4011	22.05
0.338014	188.884	4.4322	22.632
0.338534	189.175	4.4101	22.5028
0.339053	189.465	4.3464	22.2124
0.339574	189.756	4.3669	22.3272
0.340093	190.046	4.4475	22.207
0.340614	190.337	4.4389	22.6847
0.341133	190.627	4.4949	22.2962
0.341653	190.918	4.4566	22.1202
0.342174	191.209	4.4491	22.1221
0.342693	191.499	4.4088	22.3763
0.343214	191.79	4.4047	22.5071
0.343733	192.08	4.338	22.1736
0.344254	192.371	4.3551	21.9331
0.344774	192.662	4.3264	22.0991
0.345293	192.952	4.2875	22.0383
0.345814	193.243	4.3648	22.3323
0.346333	193.533	4.2785	21.8561
0.346854	193.824	4.3975	21.9146
0.347375	194.115	4.3297	21.583
0.347894	194.405	4.2341	21.7633
0.348414	194.696	4.3936	21.5119
0.348933	194.986	4.373	21.8225
0.349454	195.277	4.2747	21.9279
0.349975	195.568	4.4456	21.3211
0.350494	195.858	4.4377	21.8372
0.351014	196.149	4.5004	22.0659
0.351533	196.439	4.5846	21.8985
0.352054	196.73	4.626	21.8751
0.352573	197.02	4.612	22.3686
0.353094	197.311	4.6525	22.4577
0.353615	197.602	4.5783	22.3622
0.354134	197.892	4.7043	22.491
0.354654	198.183	4.6759	22.4121
0.355173	198.473	4.6859	22.3097
0.355694	198.764	4.726	22.064
0.356215	199.055	4.7893	22.2527
0.356734	199.345	4.9749	22.2539
0.357255	199.636	4.9538	22.2523
0.357774	199.926	4.9131	22.4284
0.358294	200.217	4.9819	22.0944
0.358815	200.508	4.8378	22.4633
0.359334	200.798	4.8681	21.9544
0.359855	201.089	4.8525	21.8315
0.360374	201.379	4.9325	22.1082
0.360894	201.67	4.9897	21.8934
0.361415	201.961	5.2107	22.2315
0.361934	202.251	5.2069	22.3969
0.362455	202.542	5.1036	21.911
0.362974	202.832	5.1744	22.1261
0.363495	203.123	5.2154	22.3301
0.364014	203.413	5.2978	22.7673
0.364534	203.704	5.3463	22.2032
0.365055	203.995	5.3954	22.1848
0.365574	204.285	5.4541	21.6821
0.366095	204.576	5.3777	22.2552
0.366614	204.866	5.3346	22.1383
0.367135	205.157	5.1121	21.755
0.367655	205.448	5.0244	21.8885
0.368174	205.738	4.8159	21.5763
0.368695	206.029	4.7295	22.0103
0.369214	206.319	4.6274	21.6223
0.369735	206.61	4.5149	21.9032
0.370256	206.901	4.4717	21.8089
0.370774	207.191	4.4742	21.9559
0.371295	207.482	4.3736	21.5518
0.371814	207.772	4.3429	21.8754
0.372335	208.063	4.3004	21.5655
0.372856	208.354	4.2651	21.5934
0.373375	208.644	4.0434	22.0655
0.373895	208.935	3.9437	22.1532
0.374414	209.225	3.9411	21.84
0.374935	209.516	3.9579	22.0053
0.375454	209.806	3.9302	22.1338
0.375975	210.097	3.9627	22.2458
0.376496	210.388	3.9736	22.238
0.377015	210.678	3.9199	22.0919
0.377535	210.969	4.1022	21.776
0.378054	211.259	4.0606	21.9462
0.378575	211.55	3.9955	22.2453
0.379096	211.841	3.9421	22.2386
0.379615	212.131	3.909	22.2406
0.380136	212.422	3.824	21.7504
0.380654	212.712	3.8385	21.9141
0.381175	213.003	3.7591	22.3467
0.381696	213.294	3.7937	22.2369
0.382215	213.584	3.7553	22.1408
0.382736	213.875	3.7234	22.4066
0.383255	214.165	3.6925	21.9495
0.383775	214.456	3.7253	21.715
0.384296	214.747	3.7529	21.8511
0.384815	215.037	3.7645	22.0607
0.385336	215.328	3.8765	21.5822
0.385855	215.618	3.8864	22.5371
0.386376	215.909	4.0914	22.6294
0.386895	216.199	4.2265	22.5147
0.387415	216.49	4.5239	22.1949
0.387936	216.781	4.845	22.4787
0.388455	217.071	4.9925	22.3754
0.388976	217.362	5.2021	22.9039
0.389495	217.652	5.4058	22.7149
0.390015	217.943	5.4466	22.7669
0.390536	218.234	5.6518	22.4502
0.391055	218.524	5.7199	23.114
0.391576	218.815	5.7967	23.0482
0.392095	219.105	6.0112	23.1662
0.392616	219.396	6.1216	23.5299
0.393136	219.687	6.1539	23.2695
0.393655	219.977	6.0403	22.7177
0.394176	220.268	5.6736	22.9046
0.394695	220.558	5.2538	22.3961
0.395216	220.849	4.7996	22.306
0.395735	221.139	4.426	22.3858
0.396256	221.43	4.1746	22.4174
0.396776	221.721	4.1058	22.0566
0.397295	222.011	4.0644	21.9307
0.397816	222.302	4.1119	22.445
0.398335	222.592	4.1557	22.6525
0.398856	222.883	4.1781	22.4966
0.399377	223.174	4.1297	22.4013
0.399895	223.464	4.169	22.4428
0.400416	223.755	4.2035	22.5791
0.400935	224.045	4.0839	22.864
0.401456	224.336	4.1511	23.2632
0.401977	224.627	4.0654	22.9832
0.402496	224.917	4.0717	22.6078
0.403016	225.208	4.0137	22.4544
0.403535	225.498	4.0471	22.794
0.404056	225.789	4.1164	22.4641
0.404577	226.08	4.1684	22.7322
0.405096	226.37	4.1801	22.9574
0.405617	226.661	4.0942	22.8163
0.406136	226.951	4.0943	22.7485
0.406656	227.242	4.1849	22.8267
0.407177	227.533	4.1349	22.7692
0.407696	227.823	4.0739	22.6746
0.408217	228.114	4.1734	22.9904
0.408736	228.404	4.1244	22.6473
0.409257	228.695	4.2396	22.5903
0.409775	228.985	4.3257	22.6759
0.410296	229.276	4.237	22.9711
0.410817	229.567	4.1633	22.6906
0.411336	229.857	4.2416	22.7628
0.411857	230.148	4.3096	22.5575
0.412376	230.438	4.535	22.7383
0.412896	230.729	4.7082	22.9518
0.413417	231.02	4.8172	22.7577
0.413936	231.31	4.982	22.7662
0.414457	231.601	5.1078	23.0106
0.414976	231.891	5.148	23.451
0.415497	232.182	5.3554	23.6643
0.416017	232.473	5.4134	23.2347
0.416536	232.763	5.3507	22.9781
0.417057	233.054	5.5135	23.1152
0.417576	233.344	5.5916	23.5936
0.418097	233.635	5.5705	23.3761
0.418616	233.925	5.5914	23.5255
0.419137	234.216	5.5812	23.4653
0.419657	234.507	5.55	23.5708
0.420176	234.797	5.6469	23.386
0.420697	235.088	5.5407	23.3196
0.421216	235.378	5.498	23.3445
0.421737	235.669	5.4355	23.3096
0.422257	235.96	5.3781	23.0203
0.422776	236.25	5.316	22.9631
0.423297	236.541	5.2539	23.5498
0.423816	236.831	5.326	23.5689
0.424337	237.122	5.3431	23.159
0.424858	237.413	5.4076	23.4016
0.425377	237.703	5.3545	23.2725
0.425897	237.994	5.3934	23.0084
0.426416	238.284	5.298	22.7474
0.426937	238.575	5.1156	22.9875
0.427458	238.866	5.1534	23.5276
0.427977	239.156	5.1704	22.8918
0.428498	239.447	5.2703	22.9481
0.429017	239.737	5.3799	23.4022
0.429537	240.028	5.2668	23.1705
0.430056	240.318	5.3561	23.2868
0.430577	240.609	5.3795	23.0755
0.431098	240.9	5.347	22.7053
0.431617	241.19	5.3505	22.8664
0.432137	241.481	5.3416	23.3689
0.432656	241.771	5.2087	22.6582
0.433177	242.062	5.111	23.1735
0.433698	242.353	5.1285	23.0141
0.434217	242.643	5.0764	22.5628
0.434738	242.934	5.1194	22.4252
0.435257	243.224	5.1031	23.1321
0.435777	243.515	5.0396	23.271
0.436298	243.806	5.0465	23.5433
0.436817	244.096	5.0123	23.5161
0.437338	244.387	5.033	23.4201
0.437857	244.677	4.9583	23.5479
0.438378	244.968	4.9166	23.5389
0.438898	245.259	4.8701	23.0015
0.439417	245.549	4.9107	22.5393
0.439938	245.84	4.8492	22.5709
0.440457	246.13	4.7874	22.5007
0.440978	246.421	4.6247	22.9205
0.441497	246.711	4.6593	22.7086
0.442017	247.002	4.7098	22.5377
0.442538	247.293	4.7899	23.0971
0.443057	247.583	4.8588	22.9949
0.443578	247.874	5.0298	23.5186
0.444097	248.164	5.06	23.3143
0.444618	248.455	5.0337	22.7446
0.445138	248.746	5.1671	22.7862
0.445657	249.036	5.2516	23.0887
0.446178	249.327	5.2559	22.8981
0.446697	249.617	5.2356	23.4155
0.447218	249.908	5.132	22.8571
0.447739	250.199	5.1301	22.7278
0.448258	250.489	4.9518	22.8804
0.448778	250.78	4.892	22.8004
0.449297	251.07	4.8514	22.7319
0.449818	251.361	4.7856	22.6697
0.450339	251.652	4.735	22.589
0.450858	251.942	4.6426	22.9618
0.451378	252.233	4.6033	22.8858
0.451897	252.523	4.5805	22.4035
0.452418	252.814	4.5745	21.9573
0.452937	253.104	4.5788	21.7888
0.453458	253.395	4.6901	22.1705
0.453979	253.686	4.6351	22.3215
0.454498	253.976	4.6535	22.7346
0.455018	254.267	4.6798	22.854
0.455537	254.557	4.6677	22.3763
0.456058	254.848	4.6334	22.6556
0.456579	255.139	4.6178	22.5344
0.457098	255.429	4.7044	22.1186
0.457619	255.72	4.7214	21.9707
0.458138	256.01	4.8936	22.0723
0.458658	256.301	4.9857	22.6311
0.459179	256.592	4.943	22.7071
0.459698	256.882	4.7777	22.2807
0.460219	257.173	4.6797	22.2763
0.460738	257.463	4.5307	22.1775
0.461258	257.754	4.5362	22.8429
0.461779	258.045	4.5256	22.4917
0.462298	258.335	4.404	22.088
0.462819	258.626	4.4281	22.2588
0.463338	258.916	4.4016	22.6927
0.463859	259.207	4.3231	22.2176
0.464378	259.497	4.3552	22.4538
0.464898	259.788	4.4264	22.3274
0.465419	260.079	4.3792	22.3276
0.465938	260.369	4.437	22.2147
0.466459	260.66	4.5867	22.2287
0.466978	260.95	4.6454	22.0996
0.467499	261.241	4.6906	22.026
0.468019	261.532	4.6612	22.0657
0.468538	261.822	4.7338	22.2197
0.469059	262.113	4.8576	22.3806
0.469578	262.403	4.9269	21.7621
0.470099	262.694	4.9014	22.1051
0.470619	262.985	4.8319	21.9831
0.471138	263.275	4.7412	21.9101
0.471659	263.566	4.6324	21.7577
0.472178	263.856	4.5325	22.2596
0.472699	264.147	4.4326	22.1492
0.47322	264.438	4.4638	22.161
0.473739	264.728	4.494	22.0132
0.474259	265.019	4.4302	22.093
0.474778	265.309	4.4451	22.1571
0.475299	265.6	4.4358	21.9574
0.475818	265.89	4.4106	21.5992
0.476339	266.181	4.3261	21.6033
0.47686	266.472	4.33	21.7614
0.477379	266.762	4.2976	21.9465
0.477899	267.053	4.2924	21.6186
0.478418	267.343	4.2409	22.1654
0.478939	267.634	4.2888	22.2652
0.47946	267.925	4.3083	22.0594
0.479979	268.215	4.2876	21.9973
0.480499	268.506	4.1531	22.4081
0.481018	268.796	4.1037	22.3028
0.481539	269.087	4.0674	22.4853
0.48206	269.378	4.0844	22.3128
0.482579	269.668	4.0783	22.3319
0.4831	269.959	4.1514	22.3424
0.483619	270.249	4.2017	21.9321
0.484139	270.54	4.1796	21.9932
0.48466	270.831	4.2126	22.4122
0.485179	271.121	4.2042	22.3747
0.4857	271.412	4.2866	22.1728
0.486219	271.702	4.219	21.9846
0.48674	271.993	4.3759	22.3499
0.487259	272.283	4.4259	22.1551
0.487779	272.574	4.4532	22.4349
0.4883	272.865	4.5685	22.6612
0.488819	273.155	4.6225	22.9048
0.48934	273.446	4.6694	23.1572
0.489859	273.736	4.7322	22.7938
0.490379	274.027	4.769	21.7938
0.4909	274.318	4.7622	22.3271
0.491419	274.608	4.6	22.2446
0.49194	274.899	4.5427	22.1125
0.492459	275.189	4.4764	21.6316
0.49298	275.48	4.3517	21.7827
0.4935	275.771	4.2193	21.7476
0.494019	276.061	4.2462	21.9873
0.49454	276.352	4.1741	22.0057
0.495059	276.642	4.1631	21.834
0.49558	276.933	4.2007	21.7887
0.496101	277.224	4.1372	22.0765
0.49662	277.514	4.082	22.2596
0.49714	277.805	4.0641	21.7211
0.497659	278.095	4.1928	21.9545
0.49818	278.386	4.132	22.2039
0.498699	278.676	4.1705	22.5653
0.49922	278.967	4.1821	22.3472
0.499741	279.258	4.2068	22.7698
0.500259	279.548	4.3236	22.6534
0.50078	279.839	4.2811	22.3373
0.501299	280.129	4.2727	22.4746
0.50182	280.42	4.3055	22.7568
0.502341	280.711	4.2649	22.6345
0.50286	281.001	4.2498	22.5212
0.50338	281.292	4.2602	22.3842
0.503899	281.582	4.1558	22.5513
0.50442	281.873	4.074	22.2065
0.504941	282.164	3.987	22.1024
0.50546	282.454	3.8976	22.2436
0.505981	282.745	3.9073	22.0822
0.5065	283.035	3.7955	22.0067
0.50702	283.326	3.8017	22.1765
0.507539	283.616	3.8613	21.8286
0.50806	283.907	3.869	21.9665
0.508581	284.198	3.8698	21.6308
0.5091	284.488	3.9313	22.2424
0.509621	284.779	3.9088	22.467
0.510139	285.069	3.9189	21.8512
0.51066	285.36	3.9549	21.3928
0.511181	285.651	4.0238	22.1021
0.5117	285.941	4.0272	21.6431
0.512221	286.232	3.9368	22.2589
0.51274	286.522	3.948	22.1335
0.51326	286.813	3.985	22.3439
0.513781	287.104	3.9231	22.0794
0.5143	287.394	4.0194	21.6507
0.514821	287.685	4.0112	21.774
0.51534	287.975	4.0586	22.0632
0.515861	288.266	4.0429	22.1716
0.516381	288.557	4.0334	21.7248
0.5169	288.847	3.9919	21.5294
0.517421	289.138	4.0108	22.2814
0.51794	289.428	4.0598	22.2044
0.518461	289.719	3.9269	21.6583
0.51898	290.009	3.9267	21.672
0.519501	290.3	3.9331	22.0629
0.520021	290.591	3.9479	21.8862
0.52054	290.881	3.9314	22.0151
0.521061	291.172	3.9417	22.464
0.52158	291.462	3.9412	22.0943
0.522101	291.753	3.8341	21.7331
0.522621	292.044	3.7829	22.1131
0.52314	292.334	3.8215	21.8044
0.523661	292.625	3.9182	22.2207
0.52418	292.915	3.8299	22.0912
0.524701	293.206	3.866	22.3544
0.525222	293.497	3.8224	22.3014
0.525741	293.787	3.8687	22.2526
0.526261	294.078	3.7386	21.9687
0.52678	294.368	3.8128	21.8598
0.527301	294.659	3.8337	21.9337
0.527822	294.95	3.7866	21.8365
0.528341	295.24	3.7866	21.9417
0.528862	295.531	3.8217	22.1311
0.529381	295.821	3.813	22.1537
0.529901	296.112	3.7486	22.1306
0.53042	296.402	3.6905	22.1993
0.530941	296.693	3.6897	21.9746
0.531462	296.984	3.6453	21.5888
0.531981	297.274	3.6819	21.5582
0.532501	297.565	3.6914	21.8004
0.53302	297.855	3.6984	22.1077
0.533541	298.146	3.6636	22.1066
0.534062	298.437	3.7372	22.18
0.534581	298.727	3.667	21.8661
0.535102	299.018	3.6328	21.7687
0.535621	299.308	3.5175	21.5028
0.536141	299.599	3.5177	21.6531
0.536662	299.89	3.5281	22.2423
0.537181	300.18	3.5537	22.0969
0.537702	300.471	3.508	21.5754
0.538221	300.761	3.401	21.765
0.538742	301.052	3.4445	22.0176
0.539262	301.343	3.4861	21.6925
0.539781	301.633	3.3759	21.5707
0.540302	301.924	3.4223	22.0797
0.540821	302.214	3.4369	22.1637
0.541342	302.505	3.4527	21.8977
0.541861	302.795	3.3834	21.8119
0.542381	303.086	3.3768	21.6358
0.542902	303.377	3.317	21.7343
0.543421	303.667	3.3127	22.0031
0.543942	303.958	3.3109	21.7781
0.544461	304.248	3.3327	22.0109
0.544982	304.539	3.288	21.7442
0.545502	304.83	3.3499	21.526
0.546021	305.12	3.3276	21.9173
0.546542	305.411	3.3587	22.1071
0.547061	305.701	3.3319	21.5818
0.547582	305.992	3.4004	21.4183
0.548103	306.283	3.4356	21.9026
0.548622	306.573	3.4816	21.6564
0.549142	306.864	3.5053	21.3686
0.549661	307.154	3.486	21.6971
0.550182	307.445	3.5273	21.5814
0.550703	307.736	3.4776	21.4154
0.551222	308.026	3.5103	21.5813
0.551742	308.317	3.4639	21.612
0.552261	308.607	3.4518	21.5095
0.552782	308.898	3.3975	21.821
0.553301	309.188	3.3986	21.6014
0.553822	309.479	3.3931	21.7169
0.554343	309.77	3.3574	21.7807
0.554862	310.06	3.343	21.4681
0.555382	310.351	3.3394	21.5133
0.555901	310.641	3.328	21.6989
0.556422	310.932	3.3244	21.9713
0.556943	311.223	3.3005	21.7017
0.557462	311.513	3.2386	21.7304
0.557983	311.804	3.2248	21.6923
0.558502	312.094	3.1705	21.5629
0.559022	312.385	3.1256	21.8191
0.559543	312.676	3.1569	22.0573
0.560062	312.966	3.1156	22.1343
0.560583	313.257	3.1151	21.7895
0.561102	313.547	3.1238	21.9275
0.561622	313.838	3.1528	22.0706
0.562143	314.129	3.1207	21.635
0.562662	314.419	3.1405	22.0782
0.563183	314.71	3.0942	21.9388
0.563702	315	3.1025	21.7535
0.564223	315.291	3.1149	21.7408
0.564742	315.581	3.0707	21.8445
0.565262	315.872	3.0417	21.8513
0.565783	316.163	3.0083	21.3418
0.566302	316.453	3.076	21.387
0.566823	316.744	3.105	21.747
0.567342	317.034	3.0538	21.4074
0.567863	317.325	3.1442	21.5177
0.568383	317.616	3.0163	21.3411
0.568902	317.906	3.025	21.5636
0.569423	318.197	2.9724	22.0461
0.569942	318.487	2.9786	21.7748
0.570463	318.778	2.9046	21.8108
0.570983	319.069	2.9202	21.4615
0.571502	319.359	2.9585	21.0987
0.572023	319.65	2.8654	21.5057
0.572542	319.94	2.8977	21.7668
0.573063	320.231	2.9472	21.6012
0.573584	320.522	2.9295	21.7836
0.574103	320.812	2.9484	21.2952
0.574623	321.103	2.9456	21.7208
0.575142	321.393	2.95	21.9073
0.575663	321.684	2.8446	21.6589
0.576182	321.974	2.852	22.1276
0.576703	322.265	2.8952	21.8232
0.577224	322.556	2.8557	21.2694
0.577743	322.846	2.7369	21.9465
0.578263	323.137	2.8262	21.725
0.578782	323.427	2.8105	22.0634
0.579303	323.718	2.7543	22.0433
0.579824	324.009	2.7381	22.3221
0.580343	324.299	2.803	21.9337
0.580863	324.59	2.7804	22.2635
0.581382	324.88	2.7373	21.8802
0.581903	325.171	2.7047	21.2795
0.582424	325.462	2.7636	21.7517
0.582943	325.752	2.7769	21.5892
0.583464	326.043	2.7376	21.3767
0.583983	326.333	2.7564	21.4366
0.584503	326.624	2.7452	21.6646
0.585022	326.914	2.7884	21.879
0.585543	327.205	2.7617	21.6878
0.586064	327.496	2.7051	21.9074
0.586583	327.786	2.7538	21.9013
0.587104	328.077	2.7725	21.6741
0.587623	328.367	2.7457	21.8646
0.588143	328.658	2.7304	21.7952
0.588664	328.949	2.8048	22.1971
0.589183	329.239	2.7274	22.0812
0.589704	329.53	2.7871	21.8987
0.590223	329.82	2.879	21.9159
0.590743	330.111	2.8566	21.6154
0.591264	330.402	2.8383	21.9822
0.591783	330.692	2.7856	22.175
0.592304	330.983	2.7802	22.0359
0.592823	331.273	2.7597	21.846
0.593344	331.564	2.7988	21.5657
0.593864	331.855	2.8814	21.6251
0.594383	332.145	2.745	21.9052
0.594904	332.436	2.816	21.7705
0.595423	332.726	2.8963	21.8619
0.595944	333.017	2.8617	21.9523
0.596463	333.307	2.8675	21.693
0.596984	333.598	2.8565	21.4567
0.597504	333.889	2.9228	22.0156
0.598023	334.179	2.9027	21.8338
0.598544	334.47	2.8435	21.8729
0.599063	334.76	2.8917	21.7825
0.599584	335.051	2.9435	22.0219
0.600105	335.342	2.8793	21.9101
0.600623	335.632	2.9117	21.7777
0.601144	335.923	2.9777	21.6768
0.601663	336.213	2.927	21.8536
0.602184	336.504	2.9983	21.7637
0.602705	336.795	2.954	21.7709
0.603224	337.085	2.9113	22.0334
0.603744	337.376	2.9916	21.8138
0.604263	337.666	2.9692	21.8859
0.604784	337.957	2.9203	22.0932
0.605305	338.248	2.841	22.2647
0.605824	338.538	2.8455	22.1671
0.606345	338.829	2.8938	21.9337
0.606864	339.119	2.9074	22.0869
0.607384	339.41	2.8622	22.473
0.607905	339.701	2.8813	22.3467
0.608424	339.991	2.9435	22.5135
0.608945	340.282	2.9597	22.3393
0.609464	340.572	2.8803	22.1782
0.609985	340.863	2.9513	22.1221
0.610503	341.153	2.9559	22.1503
0.611024	341.444	2.9394	22.5662
0.611545	341.735	2.9029	22.0899
0.612064	342.025	2.9846	21.7879
0.612585	342.316	3.0038	22.6162
0.613104	342.606	2.9779	22.1775
0.613624	342.897	2.9285	21.8695
0.614145	343.188	2.9284	22.465
0.614664	343.478	3.0186	21.9514
0.615185	343.769	3.0293	22.3661
0.615704	344.059	3.0212	21.9606
0.616225	344.35	3.0827	21.9749
0.616745	344.641	3.0942	22.7242
0.617264	344.931	3.1618	22.3873
0.617785	345.222	3.129	22.689
0.618304	345.512	3.1426	23.1953
0.618825	345.803	3.1349	22.5438
0.619344	346.093	3.0407	22.8634
0.619864	346.384	3.0998	22.7142
0.620385	346.675	3.03	22.2618
0.620904	346.965	3.0181	22.7951
0.621425	347.256	3.0519	22.602
0.621944	347.546	3.1281	22.5532
0.622465	347.837	3.0683	22.6546
0.622985	348.128	3.0868	22.2175
0.623504	348.418	3.0979	22.3897
0.624025	348.709	3.032	22.5142
0.624544	348.999	3.1388	22.8247
0.625065	349.29	3.1541	22.5431
0.625586	349.581	3.1968	22.4257
0.626105	349.871	3.145	22.6678
0.626625	350.162	3.0299	22.7312
0.627144	350.452	3.0949	22.6418
0.627665	350.743	3.0526	22.9496
0.628186	351.034	3.0883	22.7869
0.628705	351.324	3.1405	22.3215
0.629226	351.615	3.1609	22.7441
0.629744	351.905	3.1182	23.2766
0.630265	352.196	3.1299	22.9286
0.630784	352.486	3.2083	22.9962
0.631305	352.777	3.2602	22.7946
0.631826	353.068	3.2832	22.7907
0.632345	353.358	3.2255	22.5591
0.632865	353.649	3.2446	22.7763
0.633384	353.939	3.2371	22.5889
0.633905	354.23	3.2955	22.5675
0.634426	354.521	3.2832	22.193
0.634945	354.811	3.2919	22.6476
0.635466	355.102	3.335	22.7879
0.635985	355.392	3.3999	23.1064
0.636505	355.683	3.3497	23.466
0.637026	355.974	3.3682	22.331
0.637545	356.264	3.3485	23.0992
0.638066	356.555	3.3103	23.4597
0.638585	356.845	3.4699	22.8558
0.639106	357.136	3.4591	23.039
0.639626	357.427	3.486	22.5292
0.640145	357.717	3.467	23.2151
0.640666	358.008	3.5468	23.2681
0.641185	358.298	3.6292	23.0523
0.641706	358.589	3.7113	23.0098
0.642225	358.879	3.6386	22.9115
0.642745	359.17	3.639	23.2776
0.643266	359.461	3.7699	23.1721
0.643785	359.751	3.7886	22.9927
0.644306	360.042	3.817	23.2082
0.644825	360.332	3.8483	23.2205
0.645346	360.623	3.9835	23.0363
0.645866	360.914	4.0167	23.273
0.646385	361.204	4.0839	23.4358
0.646906	361.495	4.2524	22.916
0.647425	361.785	4.281	23.4119
0.647946	362.076	4.2832	23.1588
0.648467	362.367	4.4454	22.8075
0.648986	362.657	4.5307	22.947
0.649506	362.948	4.6074	23.4253
0.650025	363.238	4.7799	22.8836
0.650546	363.529	4.7994	22.6346
0.651067	363.82	4.7565	22.38
0.651586	364.11	4.7322	22.8562
0.652106	364.401	4.6857	22.5653
0.652625	364.691	4.5303	22.8006
0.653146	364.982	4.5824	22.5898
0.653665	365.272	4.3217	22.296
0.654186	365.563	4.3435	22.696
0.654707	365.854	4.1638	22.4944
0.655226	366.144	3.9353	22.1645
0.655746	366.435	3.7855	22.4935
0.656265	366.725	3.6122	22.5306
0.656786	367.016	3.5367	22.1787
0.657307	367.307	3.4248	22.5264
0.657826	367.597	3.3185	22.1166
0.658347	367.888	3.3156	22.6599
0.658866	368.178	3.3241	23.1823
0.659386	368.469	3.2786	22.7725
0.659907	368.76	3.2212	22.4552
0.660426	369.05	3.238	22.8481
0.660947	369.341	3.177	23.0299
0.661466	369.631	3.1854	22.2182
0.661986	369.922	3.164	22.65
0.662507	370.213	3.0651	22.5267
0.663026	370.503	3.0717	22.1916
0.663547	370.794	2.974	22.3926
0.664066	371.084	2.9727	23.0328
0.664587	371.375	2.9668	22.4133
0.665106	371.665	2.9742	22.5711
0.665626	371.956	2.9134	22.5368
0.666147	372.247	2.8252	22.2178
0.666666	372.537	2.9025	22.2027
0.667187	372.828	2.9286	22.4177
0.667706	373.118	2.9046	22.4254
0.668227	373.409	2.9687	22.2918
0.668747	373.7	2.8809	22.604
0.669266	373.99	2.912	22.3075
0.669787	374.281	2.8697	22.0653
0.670306	374.571	2.8479	22.6242
0.670827	374.862	2.9174	22.2104
0.671347	375.153	2.8646	22.5617
0.671866	375.443	2.8755	22.3844
0.672387	375.734	2.8488	22.1371
0.672906	376.024	2.8142	22.0553
0.673427	376.315	2.845	21.731
0.673946	376.605	2.8324	22.0251
0.674467	376.896	2.7363	22.547
0.674987	377.187	2.7003	22.7428
0.675506	377.477	2.7703	22.7647
0.676027	377.768	2.7711	22.3143
0.676546	378.058	2.7402	22.3803
0.677067	378.349	2.801	22.1197
0.677588	378.64	2.7263	22.5459
0.678107	378.93	2.6836	22.7196
0.678627	379.221	2.6839	22.0795
0.679146	379.511	2.7221	22.3369
0.679667	379.802	2.7672	22.5107
0.680188	380.093	2.7932	22.6117
0.680707	380.383	2.7476	22.2766
0.681227	380.674	2.7117	22.4435
0.681746	380.964	2.6463	22.6262
0.682267	381.255	2.7176	22.0454
0.682788	381.546	2.6578	22.2414
0.683307	381.836	2.6637	22.6088
0.683828	382.127	2.6707	22.3378
0.684347	382.417	2.7086	22.3032
0.684867	382.708	2.7434	22.1261
0.685388	382.999	2.7544	22.2692
0.685907	383.289	2.7758	22.82
0.686428	383.58	2.7635	22.014
0.686947	383.87	2.8618	21.9994
0.687468	384.161	2.9121	22.6651
0.687987	384.451	3.034	22.4505
0.688507	384.742	3.1518	22.335
0.689028	385.033	3.2781	22.2576
0.689547	385.323	3.3498	22.7015
0.690068	385.614	3.4506	23.0971
0.690587	385.904	3.5615	22.8089
0.691107	386.195	3.7448	22.5863
0.691628	386.486	3.6966	23.1385
0.692147	386.776	3.9283	23.5156
0.692668	387.067	3.9499	23.131
0.693187	387.357	4.0266	23.2447
0.693708	387.648	4.051	23.1206
0.694228	387.939	3.9707	23.5008
0.694747	388.229	4.1378	23.3583
0.695268	388.52	4.1882	23.7216
0.695787	388.81	4.1795	23.8846
0.696308	389.101	4.1613	23.8501
0.696829	389.392	4.316	23.6218
0.697348	389.682	4.4089	23.7126
0.697868	389.973	4.3668	23.5944
0.698387	390.263	4.4677	23.959
0.698908	390.554	4.5489	23.4742
0.699427	390.844	4.6258	23.6007
0.699948	391.135	4.7955	23.7124
0.700468	391.426	5.0848	23.2624
0.700987	391.716	5.4107	23.8094
0.701508	392.007	5.6236	24.1677
0.702027	392.297	5.8368	24.2541
0.702548	392.588	6.1953	24.392
0.703069	392.879	6.4803	24.5218
0.703588	393.169	6.8251	24.2712
0.704108	393.46	7.0442	24.1934
0.704627	393.75	7.1904	24.2973
0.705148	394.041	7.0663	24.3833
0.705669	394.332	6.9754	24.1737
0.706188	394.622	6.757	24.2143
0.706709	394.913	6.3904	24.1163
0.707228	395.203	6.214	23.6011
0.707748	395.494	6.0169	23.1553
0.708267	395.784	5.6317	23.7198
0.708788	396.075	5.3975	23.3504
0.709309	396.366	5.1445	23.5052
0.709828	396.656	4.9535	23.8162
0.710348	396.947	4.8149	23.5726
0.710867	397.237	4.6563	23.4367
0.711388	397.528	4.509	23.3728
0.711909	397.819	4.241	23.5053
0.712428	398.109	4.1849	24.2614
0.712949	398.4	4.081	23.1007
0.713468	398.69	3.9892	23.2842
0.713988	398.981	3.8755	22.777
0.714509	399.272	3.7691	23.3396
0.715028	399.562	3.7098	23.0253
0.715549	399.853	3.7487	23.4842
0.716068	400.143	3.6567	22.8439
0.716589	400.434	3.6373	22.4023
0.717109	400.725	3.6541	23.1728
0.717628	401.015	3.6367	23.0762
0.718149	401.306	3.6352	22.6616
0.718668	401.596	3.5984	23.4918
0.719189	401.887	3.5808	23.13
0.719708	402.177	3.5672	23.0111
0.720228	402.468	3.6202	23.4191
0.720749	402.759	3.5529	23.2224
0.721268	403.049	3.4927	23.9378
0.721789	403.34	3.6234	23.603
0.722308	403.63	3.6018	23.3291
0.722829	403.921	3.5813	23.0944
0.723349	404.212	3.6114	23.096
0.723868	404.502	3.6212	22.7731
0.724389	404.793	3.6495	22.6746
0.724908	405.083	3.6394	22.6371
0.725429	405.374	3.626	22.6162
0.72595	405.665	3.6842	22.256
0.726469	405.955	3.6854	22.5089
0.726989	406.246	3.7421	22.3546
0.727508	406.536	3.5391	22.608
0.728029	406.827	3.6071	22.5797
0.72855	407.118	3.6356	23.304
0.729069	407.408	3.5528	22.982
0.72959	407.699	3.5369	22.5769
0.730108	407.989	3.6007	22.6399
0.730629	408.28	3.6408	22.2473
0.731148	408.57	3.5453	22.4501
0.731669	408.861	3.4222	22.4164
0.73219	409.152	3.5356	22.1379
0.732709	409.442	3.4873	22.2452
0.733229	409.733	3.4731	22.7351
0.733748	410.023	3.4004	22.2668
0.734269	410.314	3.4833	22.8813
0.73479	410.605	3.5407	22.6945
0.735309	410.895	3.4867	22.6089
0.73583	411.186	3.476	22.7603
0.736349	411.476	3.4397	22.5796
0.736869	411.767	3.3566	23.1144
0.73739	412.058	3.4432	23.0327
0.737909	412.348	3.3862	23.0388
0.73843	412.639	3.342	23.1032
0.738949	412.929	3.3539	23.2491
0.73947	413.22	3.3687	22.7271
0.73999	413.511	3.3706	23.0356
0.740509	413.801	3.3601	22.845
0.74103	414.092	3.3169	23.5803
0.741549	414.382	3.3205	22.9981
0.74207	414.673	3.3597	22.5678
0.742589	414.963	3.3857	22.6221
0.743109	415.254	3.2824	23.2209
0.74363	415.545	3.2541	22.9236
0.744149	415.835	3.2081	23.1568
0.74467	416.126	3.1532	23.2279
0.745189	416.416	3.1369	22.9973
0.74571	416.707	3.0944	22.74
0.74623	416.998	3.1409	23.362
0.746749	417.288	3.0835	23.3996
0.74727	417.579	3.0945	23.3593
0.747789	417.869	3.1048	23.0817
0.74831	418.16	3.0536	22.9072
0.748831	418.451	2.9588	23.0915
0.74935	418.741	3.0059	23.0232
0.74987	419.032	2.989	23.0931
0.750389	419.322	2.9953	22.6993
0.75091	419.613	3.0168	23.2635
0.751431	419.904	2.9994	22.9135
0.75195	420.194	3.0003	23.0394
0.75247	420.485	3.0768	23.0838
0.752989	420.775	3.0668	22.7686
0.75351	421.066	3.0566	22.9666
0.754029	421.356	3.0149	23.1772
0.75455	421.647	3.0832	23.1982
0.755071	421.938	3.0911	22.9314
0.75559	422.228	3.0454	23.0682
0.75611	422.519	3.085	22.9331
0.756629	422.809	3.131	22.91
0.75715	423.1	2.9857	22.9014
0.757671	423.391	2.9846	23.3389
0.75819	423.681	2.954	23.0376
0.758711	423.972	3.0014	23.2989
0.75923	424.262	3.0675	23.1225
0.75975	424.553	2.9754	22.88
0.760271	424.844	2.971	22.8607
0.76079	425.134	3.0455	23.421
0.761311	425.425	3.0426	22.9887
0.76183	425.715	2.9763	23.1275
0.76235	426.006	3.0645	23.2031
0.762871	426.297	3.1294	22.7548
0.76339	426.587	3.0884	22.358
0.763911	426.878	3.1039	23.4797
0.76443	427.168	3.0879	23.3846
0.764951	427.459	3.0657	23.2949
0.76547	427.749	2.9668	22.7279
0.76599	428.04	2.9603	23.2041
0.766511	428.331	2.9604	22.966
0.76703	428.621	2.8544	23.0876
0.767551	428.912	2.951	22.58
0.76807	429.202	2.9559	22.9578
0.768591	429.493	2.9066	22.3384
0.769111	429.784	2.9107	22.3611
0.76963	430.074	2.8612	22.2981
0.770151	430.365	2.8697	22.5154
0.77067	430.655	2.9308	22.5123
0.771191	430.946	2.9347	22.4603
0.771711	431.237	2.9444	22.7523
0.77223	431.527	2.9573	22.8682
0.772751	431.818	2.9154	22.9738
0.77327	432.108	2.8305	23.2844
0.773791	432.399	2.855	23.0523
0.774312	432.69	2.8862	23.0587
0.774831	432.98	2.9275	22.9235
0.775351	433.271	2.9141	22.9804
0.77587	433.561	2.9655	23.0849
0.776391	433.852	2.9737	23.1436
0.77691	434.142	3.0633	23.4046
0.777431	434.433	3.0925	23.4235
0.777952	434.724	3.0105	23.535
0.778471	435.014	2.9244	22.6995
0.778991	435.305	2.9028	22.921
0.77951	435.595	2.8608	23.2965
0.780031	435.886	2.8463	22.8299
0.780552	436.177	2.8083	23.0574
0.781071	436.467	2.7846	22.5731
0.781591	436.758	2.7717	23.1074
0.78211	437.048	2.8204	22.8603
0.782631	437.339	2.8165	22.6488
0.783152	437.63	2.7759	22.7561
0.783671	437.92	2.6994	23.1738
0.784192	438.211	2.6579	23.4136
0.784711	438.501	2.6319	22.8074
0.785231	438.792	2.5591	22.8959
0.78575	439.082	2.6498	23.0281
0.786271	439.373	2.5948	22.7079
0.786792	439.664	2.5687	22.9093
0.787311	439.954	2.6366	23.3954
0.787832	440.245	2.5671	23.3136
0.788351	440.535	2.6013	23.1625
0.788871	440.826	2.6606	23.3648
0.789392	441.117	2.6703	23.7262
0.789911	441.407	2.658	23.2012
0.790432	441.698	2.6693	23.2654
0.790951	441.988	2.6768	23.9312
0.791471	442.279	2.7109	23.2088
0.791992	442.57	2.6919	22.7886
0.792511	442.86	2.6649	23.2121
0.793032	443.151	2.6522	22.8776
0.793551	443.441	2.713	22.8102
0.794072	443.732	2.7157	23.1643
0.794592	444.023	2.7696	22.8282
0.795111	444.313	2.7872	23.031
0.795632	444.604	2.7646	23.3243
0.796151	444.894	2.8169	22.7003
0.796672	445.185	2.8022	22.6207
0.797191	445.475	2.8927	22.6847
0.797712	445.766	2.854	22.3166
0.798232	446.057	2.9131	22.8583
0.798751	446.347	2.8839	22.5586
0.799272	446.638	2.9128	22.5436
0.799791	446.928	2.9715	22.3969
0.800312	447.219	2.9041	22.6978
0.800832	447.51	2.9922	23.2124
0.801351	447.8	3.004	23.351
0.801872	448.091	3.0038	23.3549
0.802391	448.381	3.0022	23.2294
0.802912	448.672	3.0122	22.8532
0.803433	448.963	3.0399	22.9741
0.803952	449.253	3.0933	22.9961
0.804472	449.544	2.9942	22.6666
0.804991	449.834	3.0042	22.6977
0.805512	450.125	2.9768	22.9106
0.806033	450.416	3.0213	22.9758
0.806552	450.706	3.0104	23.267
0.807073	450.997	2.9752	23.519
0.807592	451.287	3.0437	23.5822
0.808112	451.578	3.078	23.2668
0.808631	451.868	3.1156	23.2706
0.809152	452.159	3.0612	23.1316
0.809673	452.45	3.0567	22.73
0.810192	452.74	3.0963	23.4817
0.810712	453.031	3.0701	24.0049
0.811231	453.321	3.1401	23.4599
0.811752	453.612	3.1287	23.6002
0.812273	453.903	3.1581	23.474
0.812792	454.193	3.1987	23.6917
0.813313	454.484	3.1922	23.2896
0.813832	454.774	3.2337	23.9497
0.814352	455.065	3.2253	23.6838
0.814873	455.356	3.2312	23.1931
0.815392	455.646	3.333	23.2325
0.815913	455.937	3.323	23.3052
0.816432	456.227	3.3525	23.5215
0.816953	456.518	3.351	23.2488
0.817473	456.809	3.4673	23.2546
0.817992	457.099	3.5023	23.2917
0.818513	457.39	3.502	23.3442
0.819032	457.68	3.4767	24.0584
0.819553	457.971	3.4763	24.0596
0.820072	458.261	3.4681	23.8616
0.820592	458.552	3.5383	24.7268
0.821113	458.843	3.6044	24.4205
0.821632	459.133	3.6083	24.32
0.822153	459.424	3.6262	24.8789
0.822672	459.714	3.7125	25.2549
0.823193	460.005	3.6636	24.876
0.823713	460.296	3.6633	24.6056
0.824232	460.586	3.7312	25.1778
0.824753	460.877	3.6967	25.0646
0.825272	461.167	3.7621	24.8265
0.825793	461.458	3.6877	24.6975
0.826314	461.749	3.6468	25.1913
0.826833	462.039	3.66	24.2847
0.827353	462.33	3.7282	24.1453
0.827872	462.62	3.7441	24.8129
0.828393	462.911	3.8184	24.1543
0.828914	463.202	3.9035	24.233
0.829433	463.492	3.9613	24.7785
0.829954	463.783	3.9497	24.4306
0.830472	464.073	3.9271	24.9487
0.830993	464.364	3.9906	25.2164
0.831512	464.654	3.9902	25.6995
0.832033	464.945	4.0192	26.3158
0.832554	465.236	4.0663	25.7955
0.833073	465.526	4.0626	25.437
0.833593	465.817	4.0151	25.7104
0.834112	466.107	4.0969	25.8152
0.834633	466.398	4.0208	25.6897
0.835154	466.689	4.05	25.2242
0.835673	466.979	3.9584	25.6439
0.836194	467.27	3.9084	25.4642
0.836713	467.56	3.933	25.3329
0.837233	467.851	3.933	26.1309
0.837754	468.142	3.8882	26.4983
0.838273	468.432	3.8876	27.0657
0.838794	468.723	3.9559	26.8985
0.839313	469.013	3.9096	26.6611
0.839834	469.304	3.8857	26.8832
0.840354	469.595	3.9995	26.9145
0.840873	469.885	3.9638	26.7511
0.841394	470.176	3.8933	26.6587
0.841913	470.466	3.9524	26.8265
0.842434	470.757	3.9263	26.7844
0.842953	471.047	3.8859	27.0516
0.843473	471.338	3.9454	27.2766
0.843994	471.629	3.936	27.7947
0.844513	471.919	4.0329	28.1149
0.845034	472.21	4.0383	28.7606
0.845553	472.5	4.0808	28.7807
0.846074	472.791	4.1353	28.2398
0.846594	473.082	4.1631	27.872
0.847113	473.372	4.1696	28.5549
0.847634	473.663	4.1057	28.167
0.848153	473.953	4.0993	28.2296
0.848674	474.244	4.0616	28.7119
0.849195	474.535	3.934	28.8308
0.849713	474.825	3.9909	29.3977
0.850234	475.116	3.9545	29.3832
0.850753	475.406	3.9582	29.4408
0.851274	475.697	3.9762	30.4337
0.851795	475.988	3.9925	29.609
0.852314	476.278	3.8695	29.7652
0.852834	476.569	3.8244	29.4993
0.853353	476.859	3.8547	29.2021
0.853874	477.15	3.8687	29.9762
0.854393	477.44	3.8577	30.1399
0.854914	477.731	3.8739	30.4798
0.855435	478.022	3.8676	30.9926
0.855954	478.312	3.8916	30.8911
0.856474	478.603	3.8618	30.8237
0.856993	478.893	3.8754	30.7129
0.857514	479.184	3.9273	30.9647
0.858035	479.475	3.905	31.7818
0.858554	479.765	3.8359	31.8456
0.859075	480.056	3.9174	32.1746
0.859593	480.346	4.072	30.7748
0.860114	480.637	4.0548	31.7133
0.860635	480.928	4.0741	32.0162
0.861154	481.218	4.0936	30.8944
0.861675	481.509	4.2655	31.2561
0.862194	481.799	4.2305	31.3768
0.862714	482.09	4.185	31.5855
0.863235	482.381	4.221	30.9179
0.863754	482.671	4.2364	31.972
0.864275	482.962	4.2348	31.468
0.864794	483.252	4.1544	31.4398
0.865315	483.543	4.123	31.1797
0.865834	483.833	4.1531	31.5359
0.866354	484.124	4.0555	31.935
0.866875	484.415	4.0622	32.0469
0.867394	484.705	4.0319	31.3092
0.867915	484.996	3.9738	30.4565
0.868434	485.286	3.9033	30.8664
0.868955	485.577	4.0178	31.1321
0.869475	485.868	4.0687	31.1427
0.869994	486.158	4.125	31.2469
0.870515	486.449	4.167	31.401
0.871034	486.739	4.0714	31.4039
0.871555	487.03	3.9398	31.6576
0.872075	487.321	3.9535	30.8659
0.872594	487.611	3.8861	31.6471
0.873115	487.902	3.923	31.2224
0.873634	488.192	3.9128	31.5088
0.874155	488.483	3.827	32.0054
0.874674	488.773	3.8474	32.4102
0.875195	489.064	3.8451	33.0463
0.875715	489.355	3.8613	32.6569
0.876234	489.645	3.7743	32.0428
0.876755	489.936	3.7101	32.7121
0.877274	490.226	3.6031	32.1473
0.877795	490.517	3.5907	31.1564
0.878316	490.808	3.5831	31.7576
0.878835	491.098	3.5617	31.7932
0.879355	491.389	3.5148	32.4268
0.879874	491.679	3.5474	31.7905
0.880395	491.97	3.5066	32.0554
0.880916	492.261	3.4226	31.7868
0.881435	492.551	3.4779	32.2101
0.881955	492.842	3.5388	31.8197
0.882474	493.132	3.5272	31.7523
0.882995	493.423	3.6152	32.1986
0.883516	493.714	3.5591	31.958
0.884035	494.004	3.5459	31.6174
0.884556	494.295	3.6464	32.5828
0.885075	494.585	3.5801	32.5802
0.885595	494.876	3.624	33.192
0.886116	495.167	3.647	33.1588
0.886635	495.457	3.6546	32.3819
0.887156	495.748	3.5977	32.3887
0.887675	496.038	3.6631	32.0596
0.888196	496.329	3.6485	31.4535
0.888715	496.619	3.6158	31.3226
0.889235	496.91	3.6361	31.1131
0.889756	497.201	3.6756	31.0398
0.890275	497.491	3.6109	31.3591
0.890796	497.782	3.5986	31.7488
0.891315	498.072	3.6734	32.5241
0.891835	498.363	3.6604	32.3787
0.892356	498.654	3.603	33.0255
0.892875	498.944	3.4818	33.0221
0.893396	499.235	3.4497	33.2129
0.893915	499.525	3.4402	33.2688
0.894436	499.816	3.5464	32.9776
0.894956	500.107	3.419	32.5916
0.895475	500.397	3.3539	32.8768
0.895996	500.688	3.3995	33.1057
0.896515	500.978	3.3342	32.8929
0.897036	501.269	3.2595	32.5699
0.897557	501.56	3.2619	32.9419
0.898076	501.85	3.2103	33.2561
0.898596	502.141	3.1583	33.0372
0.899115	502.431	3.1304	35.0759
0.899636	502.722	3.0321	35.0497
0.900155	503.012	3.1001	35.7649
0.900676	503.303	3.0709	35.867
0.901196	503.594	3.0505	35.685
0.901715	503.884	3.0365	34.8685
0.902236	504.175	3.0439	35.4523
0.902755	504.465	3.0332	35.4494
0.903276	504.756	2.9693	36.2307
0.903797	505.047	3.0002	34.8399
0.904316	505.337	2.9381	34.789
0.904836	505.628	2.9676	35.1575
0.905355	505.918	3.0413	34.7971
0.905876	506.209	2.9697	34.424
0.906397	506.5	2.9927	34.5866
0.906916	506.79	2.8913	35.3894
0.907437	507.081	2.9296	35.3891
0.907956	507.371	2.9239	35.3135
0.908476	507.662	2.8816	35.2998
0.908995	507.952	2.8766	36.5864
0.909516	508.243	2.8361	36.7666
0.910037	508.534	2.7663	36.3036
0.910556	508.824	2.7116	36.5278
0.911076	509.115	2.6914	36.8841
0.911595	509.405	2.7087	36.8144
0.912116	509.696	2.6504	36.2393
0.912637	509.987	2.6526	36.5689
0.913156	510.277	2.6403	36.1357
0.913677	510.568	2.5908	35.5102
0.914196	510.858	2.5232	35.2546
0.914716	511.149	2.5284	34.3379
0.915237	511.44	2.5756	33.0475
0.915756	511.73	2.5663	33.2806
0.916277	512.021	2.5139	32.0493
0.916796	512.311	2.5105	32.1824
0.917317	512.602	2.4993	31.8155
0.917837	512.893	2.499	32.0338
0.918356	513.183	2.5216	32.0682
0.918877	513.474	2.4912	31.2918
0.919396	513.764	2.4586	31.4485
0.919917	514.055	2.4848	31.0057
0.920436	514.345	2.4492	32.0357
0.920956	514.636	2.3736	32.1785
0.921477	514.927	2.4216	32.5324
0.921996	515.217	2.4059	32.8398
0.922517	515.508	2.4444	34.0436
0.923036	515.798	2.3678	35.7082
0.923557	516.089	2.3608	35.055
0.924077	516.38	2.3834	34.6274
0.924596	516.67	2.3954	34.0631
0.925117	516.961	2.3993	34.445
0.925636	517.251	2.3956	33.8891
0.926157	517.542	2.3966	34.0161
0.926678	517.833	2.369	33.091
0.927197	518.123	2.385	33.3594
0.927717	518.414	2.3496	33.2879
0.928236	518.704	2.3123	32.5914
0.928757	518.995	2.304	32.8289
0.929278	519.286	2.3402	34.0294
0.929797	519.576	2.2375	32.0763
0.930317	519.867	2.1845	32.1658
0.930836	520.157	2.2399	32.8326
0.931357	520.448	2.277	33.0355
0.931876	520.738	2.2766	33.8774
0.932397	521.029	2.2672	34.7591
0.932918	521.32	2.2289	35.0244
0.933437	521.61	2.1987	34.7931
0.933957	521.901	2.2854	35.5992
0.934476	522.191	2.3142	37.1651
0.934997	522.482	2.3521	38.4593
0.935518	522.773	2.3177	39.6925
0.936037	523.063	2.201	39.3461
0.936558	523.354	2.2269	38.7289
0.937077	523.644	2.2247	38.4237
0.937597	523.935	2.1698	37.7624
0.938118	524.226	2.1908	37.6093
0.938637	524.516	2.207	37.85
0.939158	524.807	2.1929	37.2158
0.939677	525.097	2.1714	37.2442
0.940197	525.388	2.2396	36.7216
0.940718	525.679	2.1713	37.0688
0.941237	525.969	2.1164	36.6825
0.941758	526.26	2.097	37.533
0.942277	526.55	2.078	37.5812
0.942798	526.841	2.0603	37.2897
0.943317	527.131	2.0432	36.5793
0.943837	527.422	2.0002	35.3861
0.944358	527.713	1.9266	34.1354
0.944877	528.003	1.9598	33.2654
0.945398	528.294	1.9325	32.3477
0.945917	528.584	1.9551	32.1164
0.946438	528.875	1.9862	31.1482
0.946958	529.166	2.0101	29.8488
0.947477	529.456	1.9672	29.9226
0.947998	529.747	1.9672	29.9355
0.948517	530.037	1.9482	29.4719
0.949038	530.328	1.9107	30.3852
0.949559	530.619	1.9255	30.9031
0.950077	530.909	1.8692	30.233
0.950598	531.2	1.8856	30.9201
0.951117	531.49	1.9053	31.7199
0.951638	531.781	1.8639	32.2721
0.952159	532.072	1.9033	31.2084
0.952678	532.362	1.9167	30.416
0.953198	532.653	1.8822	30.5382
0.953717	532.943	1.831	30.2095
0.954238	533.234	1.8492	30.6544
0.954757	533.524	1.9253	30.9588
0.955278	533.815	1.8928	31.0576
0.955799	534.106	1.8517	30.6201
0.956318	534.396	1.8796	30.1122
0.956838	534.687	1.9048	29.8423
0.957357	534.977	1.8808	28.7142
0.957878	535.268	1.8288	28.1004
0.958399	535.559	1.8334	27.8926
0.958918	535.849	1.8146	27.3711
0.959439	536.14	1.7944	27.161
0.959957	536.43	1.8051	26.5433
0.960478	536.721	1.7713	27.157
0.960999	537.012	1.7689	27.09
0.961518	537.302	1.7564	27.1437
0.962039	537.593	1.7786	27.3886
0.962558	537.883	1.7419	27.0447
0.963078	538.174	1.7469	27.0974
0.963599	538.465	1.7453	27.1808
0.964118	538.755	1.7138	26.836
0.964639	539.046	1.7158	26.6477
0.965158	539.336	1.7055	26.9955
0.965679	539.627	1.7437	26.9925
0.966198	539.917	1.6706	26.5338
0.966718	540.208	1.7369	27.4998
0.967239	540.499	1.7067	27.4612
0.967758	540.789	1.6648	27.7341
0.968279	541.08	1.6514	27.5417
0.968798	541.37	1.6407	26.7558
0.969319	541.661	1.646	26.0453
0.969839	541.952	1.6589	25.3479
0.970358	542.242	1.6488	25.6818
0.970879	542.533	1.6346	25.1759
0.971398	542.823	1.6453	25.092
0.971919	543.114	1.6144	25.2269
0.972439	543.405	1.5921	25.4366
0.972958	543.695	1.6162	25.2622
0.973479	543.986	1.6105	25.9667
0.973998	544.276	1.5665	26.8559
0.974519	544.567	1.5784	28.5253
0.975038	544.857	1.6202	28.5512
0.975559	545.148	1.5733	29.5623
0.976079	545.439	1.5545	30.4351
0.976598	545.729	1.5089	32.1018
0.977119	546.02	1.5949	33.4598
0.977638	546.31	1.5529	33.7201
0.978159	546.601	1.5649	34.173
0.97868	546.892	1.5559	33.3838
0.979199	547.182	1.5753	33.3953
0.979719	547.473	1.5617	33.1315
0.980238	547.763	1.5512	33.442
0.980759	548.054	1.5228	34.6042
0.98128	548.345	1.5336	35.6622
0.981799	548.635	1.527	35.2005
0.982319	548.926	1.5512	35.2342
0.982838	549.216	1.4808	35.4711
0.983359	549.507	1.5212	35.8533
0.98388	549.798	1.5469	34.4813
0.984399	550.088	1.553	34.4813
0.98492	550.379	1.4802	33.7831
0.985439	550.669	1.5072	33.3
0.985959	550.96	1.5204	33.371
0.986478	551.25	1.5357	33
0.986999	551.541	1.506	32.202
0.98752	551.832	1.4935	31.9984
0.988039	552.122	1.4583	33.0358
0.98856	552.413	1.467	32.9178
0.989078	552.703	1.5125	34.1082
0.989599	552.994	1.5063	34.8013
0.99012	553.285	1.4683	35.9728
0.990639	553.575	1.4959	37.0553
0.99116	553.866	1.5299	38.6885
0.991679	554.156	1.5117	39.061
0.992199	554.447	1.5393	38.2241
0.99272	554.738	1.5193	38.1566
0.993239	555.028	1.5125	38.993
0.99376	555.319	1.4933	39.2871
0.994279	555.609	1.4935	39.5513
0.9948	555.9	1.4962	39.801
0.99532	556.191	1.4512	39.669
0.995839	556.481	1.4423	40.5208
0.99636	556.772	1.4554	41.1366
0.996879	557.062	1.4583	41.104
0.9974	557.353	1.4561	41.9523
0.997919	557.643	1.483	41.012
0.99844	557.934	1.4271	39.3765
0.99896	558.225	1.4725	37.2667
0.999479	558.515	1.5025	35.8585
1	558.806	1.49	33.8716

## Sheet: 3.26.19 V409I
Line width = 300
VI B2		0-33	0-255
Normalized cortex length	Distance (µm)	GFP Fluorescence Intensity	DAPI Fluorescence Intensity	GFP Fluorescence Intensity AVG
0	0	9.909	9.909	9.27482	0.309189
0.000494767	0.291	9.8425	9.8425	6.39256	0.213105
0.000987833	0.581	9.7242	9.7242	8.28148	0.276075
0.0014826	0.872	9.5281	9.5281	6.04839	0.201631
0.00197567	1.162	9.4544	9.4544	29.9973	1
0.00247043	1.453	9.1742	9.1742
0.0029652	1.744	8.7359	8.7359
0.00345827	2.034	8.6275	8.6275
0.00395303	2.325	8.4437	8.4437
0.0044461	2.615	8.1978	8.1978
0.00494087	2.906	8.2449	8.2449
0.00543393	3.196	8.2572	8.2572
0.0059287	3.487	8.3491	8.3491
0.00642347	3.778	8.3714	8.3714
0.00691653	4.068	8.0792	8.0792
0.0074113	4.359	8.0298	8.0298
0.00790437	4.649	8.0467	8.0467
0.00839913	4.94	7.9975	7.9975
0.0088939	5.231	8.0932	8.0932
0.00938697	5.521	8.2842	8.2842
0.00988173	5.812	8.4	8.4
0.0103748	6.102	8.4789	8.4789
0.0108696	6.393	8.4949	8.4949
0.0113643	6.684	8.3934	8.3934
0.0118574	6.974	8.2549	8.2549
0.0123522	7.265	7.9531	7.9531
0.0128452	7.555	7.7236	7.7236
0.01334	7.846	7.4216	7.4216
0.0138348	8.137	7.2305	7.2305
0.0143278	8.427	7.1142	7.1142
0.0148226	8.718	7.0055	7.0055
0.0153157	9.008	7.1085	7.1085
0.0158104	9.299	7.2021	7.2021
0.0163035	9.589	7.3296	7.3296
0.0167983	9.88	7.5985	7.5985
0.017293	10.171	7.6479	7.6479
0.0177861	10.461	7.7843	7.7843
0.0182809	10.752	7.7861	7.7861
0.0187739	11.042	7.6756	7.6756
0.0192687	11.333	7.6439	7.6439
0.0197635	11.624	7.4478	7.4478
0.0202565	11.914	7.4663	7.4663
0.0207513	12.205	7.3145	7.3145
0.0212444	12.495	7.1646	7.1646
0.0217391	12.786	7.2072	7.2072
0.0222339	13.077	7.1183	7.1183
0.022727	13.367	7.2928	7.2928
0.0232217	13.658	7.2202	7.2202
0.0237148	13.948	7.1045	7.1045
0.0242096	14.239	7.3122	7.3122
0.0247043	14.53	7.3696	7.3696
0.0251974	14.82	7.3994	7.3994
0.0256922	15.111	7.3201	7.3201
0.0261852	15.401	7.4175	7.4175
0.02668	15.692	7.4198	7.4198
0.0271731	15.982	7.4066	7.4066
0.0276678	16.273	7.354	7.354
0.0281626	16.564	7.3604	7.3604
0.0286557	16.854	7.4828	7.4828
0.0291504	17.145	7.5642	7.5642
0.0296435	17.435	7.4749	7.4749
0.0301383	17.726	7.4702	7.4702
0.030633	18.017	7.4693	7.4693
0.0311261	18.307	7.5376	7.5376
0.0316209	18.598	7.7605	7.7605
0.0321139	18.888	7.9041	7.9041
0.0326087	19.179	8.1223	8.1223
0.0331035	19.47	8.1923	8.1923
0.0335965	19.76	8.374	8.374
0.0340913	20.051	8.5562	8.5562
0.0345844	20.341	8.8257	8.8257
0.0350791	20.632	8.9846	8.9846
0.0355739	20.923	9.0001	9.0001
0.036067	21.213	8.951	8.951
0.0365617	21.504	8.8561	8.8561
0.0370548	21.794	8.8682	8.8682
0.0375496	22.085	8.9929	8.9929
0.0380426	22.375	9.2626	9.2626
0.0385374	22.666	9.3287	9.3287
0.0390322	22.957	9.5953	9.5953
0.0395252	23.247	9.632	9.632
0.04002	23.538	9.4455	9.4455
0.0405131	23.828	9.4129	9.4129
0.0410078	24.119	9.1283	9.1283
0.0415026	24.41	8.9257	8.9257
0.0419957	24.7	8.7471	8.7471
0.0424904	24.991	8.4869	8.4869
0.0429835	25.281	8.3766	8.3766
0.0434783	25.572	8.129	8.129
0.043973	25.863	8.0314	8.0314
0.0444661	26.153	7.9328	7.9328
0.0449609	26.444	7.9314	7.9314
0.0454539	26.734	7.8933	7.8933
0.0459487	27.025	7.9029	7.9029
0.0464435	27.316	7.8295	7.8295
0.0469365	27.606	7.9907	7.9907
0.0474313	27.897	8.2732	8.2732
0.0479244	28.187	8.7116	8.7116
0.0484191	28.478	9.2035	9.2035
0.0489122	28.768	9.3689	9.3689
0.049407	29.059	8.9689	8.9689
0.0499017	29.35	8.2198	8.2198
0.0503948	29.64	7.7384	7.7384
0.0508896	29.931	7.3794	7.3794
0.0513826	30.221	7.1881	7.1881
0.0518774	30.512	7.046	7.046
0.0523722	30.803	6.9467	6.9467
0.0528652	31.093	6.769	6.769
0.05336	31.384	6.8004	6.8004
0.0538531	31.674	6.7528	6.7528
0.0543478	31.965	6.6181	6.6181
0.0548426	32.256	6.6714	6.6714
0.0553357	32.546	6.5431	6.5431
0.0558304	32.837	6.6579	6.6579
0.0563235	33.127	6.7235	6.7235
0.0568183	33.418	6.8684	6.8684
0.057313	33.709	6.9473	6.9473
0.0578061	33.999	7.0651	7.0651
0.0583009	34.29	7.1779	7.1779
0.0587939	34.58	7.1059	7.1059
0.0592887	34.871	7.2116	7.2116
0.0597818	35.161	7.2325	7.2325
0.0602765	35.452	7.3416	7.3416
0.0607713	35.743	7.3965	7.3965
0.0612644	36.033	7.3048	7.3048
0.0617591	36.324	7.2611	7.2611
0.0622522	36.614	6.9082	6.9082
0.062747	36.905	6.8161	6.8161
0.0632417	37.196	6.6434	6.6434
0.0637348	37.486	6.6082	6.6082
0.0642296	37.777	6.6969	6.6969
0.0647226	38.067	6.7682	6.7682
0.0652174	38.358	6.7265	6.7265
0.0657122	38.649	6.8878	6.8878
0.0662052	38.939	6.9182	6.9182
0.0667	39.23	7.0141	7.0141
0.0671931	39.52	7.1198	7.1198
0.0676878	39.811	7.3462	7.3462
0.0681826	40.102	7.58	7.58
0.0686757	40.392	7.7665	7.7665
0.0691704	40.683	8.0802	8.0802
0.0696635	40.973	8.2955	8.2955
0.0701583	41.264	8.7183	8.7183
0.0706513	41.554	9.1107	9.1107
0.0711461	41.845	9.3693	9.3693
0.0716409	42.136	9.7585	9.7585
0.0721339	42.426	9.9588	9.9588
0.0726287	42.717	10.3101	10.3101
0.0731218	43.007	10.5714	10.5714
0.0736165	43.298	10.7677	10.7677
0.0741113	43.589	11.0133	11.0133
0.0746044	43.879	11.2336	11.2336
0.0750991	44.17	11.1934	11.1934
0.0755922	44.46	11.2189	11.2189
0.076087	44.751	11.1686	11.1686
0.0765817	45.042	11.2505	11.2505
0.0770748	45.332	11.3805	11.3805
0.0775696	45.623	11.5925	11.5925
0.0780626	45.913	11.5956	11.5956
0.0785574	46.204	11.4647	11.4647
0.0790522	46.495	11.5368	11.5368
0.0795452	46.785	11.3091	11.3091
0.08004	47.076	10.9691	10.9691
0.0805331	47.366	10.5469	10.5469
0.0810278	47.657	10.1769	10.1769
0.0815209	47.947	9.9462	9.9462
0.0820157	48.238	9.8796	9.8796
0.0825104	48.529	9.8374	9.8374
0.0830035	48.819	9.9061	9.9061
0.0834983	49.11	9.8174	9.8174
0.0839913	49.4	9.8087	9.8087
0.0844861	49.691	9.6414	9.6414
0.0849809	49.982	9.5318	9.5318
0.0854739	50.272	9.8469	9.8469
0.0859687	50.563	9.956	9.956
0.0864618	50.853	10.1786	10.1786
0.0869565	51.144	10.2125	10.2125
0.0874513	51.435	10.2497	10.2497
0.0879444	51.725	10.2728	10.2728
0.0884391	52.016	10.5817	10.5817
0.0889322	52.306	10.8641	10.8641
0.089427	52.597	10.8798	10.8798
0.0899217	52.888	10.9715	10.9715
0.0904148	53.178	11.202	11.202
0.0909096	53.469	11.1917	11.1917
0.0914026	53.759	11.1322	11.1322
0.0918974	54.05	11.1789	11.1789
0.0923905	54.34	11.4248	11.4248
0.0928852	54.631	11.6626	11.6626
0.09338	54.922	11.9736	11.9736
0.0938731	55.212	11.9815	11.9815
0.0943678	55.503	11.8204	11.8204
0.0948609	55.793	11.7316	11.7316
0.0953557	56.084	12.1338	12.1338
0.0958504	56.375	12.1278	12.1278
0.0963435	56.665	12.1128	12.1128
0.0968383	56.956	12.5719	12.5719
0.0973313	57.246	12.8339	12.8339
0.0978261	57.537	13.2045	13.2045
0.0983209	57.828	13.5718	13.5718
0.0988139	58.118	13.7151	13.7151
0.0993087	58.409	13.9341	13.9341
0.0998018	58.699	13.9411	13.9411
0.100297	58.99	14.0073	14.0073
0.10079	59.28	14.2351	14.2351
0.101284	59.571	14.4434	14.4434
0.101779	59.862	14.9193	14.9193
0.102272	60.152	15.3188	15.3188
0.102767	60.443	15.6326	15.6326
0.10326	60.733	15.8932	15.8932
0.103755	61.024	16.1001	16.1001
0.10425	61.315	16.5574	16.5574
0.104743	61.605	16.3157	16.3157
0.105237	61.896	16.0158	16.0158
0.10573	62.186	15.7653	15.7653
0.106225	62.477	15.6905	15.6905
0.10672	62.768	15.4493	15.4493
0.107213	63.058	15.113	15.113
0.107708	63.349	14.7482	14.7482
0.108201	63.639	15.0671	15.0671
0.108696	63.93	15.0482	15.0482
0.10919	64.221	15.0727	15.0727
0.109683	64.511	15.1201	15.1201
0.110178	64.802	14.8485	14.8485
0.110671	65.092	14.517	14.517
0.111166	65.383	14.1391	14.1391
0.111659	65.673	13.6556	13.6556
0.112154	65.964	13.1554	13.1554
0.112649	66.255	12.8916	12.8916
0.113142	66.545	12.8371	12.8371
0.113637	66.836	12.7761	12.7761
0.11413	67.126	12.8141	12.8141
0.114624	67.417	13.1525	13.1525
0.115119	67.708	13.604	13.604
0.115612	67.998	13.941	13.941
0.116107	68.289	14.3595	14.3595
0.1166	68.579	14.6405	14.6405
0.117095	68.87	15.0318	15.0318
0.11759	69.161	15.2603	15.2603
0.118083	69.451	15.1803	15.1803
0.118577	69.742	15.3538	15.3538
0.11907	70.032	15.46	15.46
0.119565	70.323	15.565	15.565
0.12006	70.614	15.6637	15.6637
0.120553	70.904	15.8897	15.8897
0.121048	71.195	15.8822	15.8822
0.121541	71.485	16.0875	16.0875
0.122036	71.776	16.1182	16.1182
0.122529	72.066	15.8779	15.8779
0.123023	72.357	15.585	15.585
0.123518	72.648	14.8625	14.8625
0.124011	72.938	14.1389	14.1389
0.124506	73.229	13.3931	13.3931
0.124999	73.519	12.505	12.505
0.125494	73.81	11.6647	11.6647
0.125989	74.101	11.2122	11.2122
0.126482	74.391	10.9082	10.9082
0.126977	74.682	10.7874	10.7874
0.12747	74.972	11.0167	11.0167
0.127964	75.263	11.8239	11.8239
0.128459	75.554	12.9216	12.9216
0.128952	75.844	13.5716	13.5716
0.129447	76.135	14.7282	14.7282
0.12994	76.425	15.619	15.619
0.130435	76.716	16.5211	16.5211
0.13093	77.007	17.2819	17.2819
0.131423	77.297	17.9273	17.9273
0.131917	77.588	18.3168	18.3168
0.13241	77.878	18.9203	18.9203
0.132905	78.169	19.4377	19.4377
0.133398	78.459	19.6454	19.6454
0.133893	78.75	19.5297	19.5297
0.134388	79.041	19.4717	19.4717
0.134881	79.331	19.4812	19.4812
0.135376	79.622	19.2128	19.2128
0.135869	79.912	19.0949	19.0949
0.136363	80.203	19.2321	19.2321
0.136858	80.494	19.153	19.153
0.137351	80.784	19.1007	19.1007
0.137846	81.075	19.2856	19.2856
0.138339	81.365	19.2699	19.2699
0.138834	81.656	19.3319	19.3319
0.139329	81.947	19.4611	19.4611
0.139822	82.237	19.9041	19.9041
0.140317	82.528	19.8642	19.8642
0.14081	82.818	19.6481	19.6481
0.141304	83.109	19.5091	19.5091
0.141799	83.4	19.6402	19.6402
0.142292	83.69	19.5897	19.5897
0.142787	83.981	19.249	19.249
0.14328	84.271	18.8743	18.8743
0.143775	84.562	18.5358	18.5358
0.144268	84.852	18.1061	18.1061
0.144763	85.143	17.1698	17.1698
0.145257	85.434	16.5277	16.5277
0.14575	85.724	15.7502	15.7502
0.146245	86.015	14.943	14.943
0.146738	86.305	14.3465	14.3465
0.147233	86.596	13.7311	13.7311
0.147728	86.887	13.3972	13.3972
0.148221	87.177	12.9877	12.9877
0.148716	87.468	12.9017	12.9017
0.149209	87.758	12.9335	12.9335
0.149703	88.049	13.0544	13.0544
0.150198	88.34	13.2411	13.2411
0.150691	88.63	13.2875	13.2875
0.151186	88.921	13.3323	13.3323
0.151679	89.211	13.4955	13.4955
0.152174	89.502	13.6648	13.6648
0.152669	89.793	13.6504	13.6504
0.153162	90.083	13.676	13.676
0.153657	90.374	13.7192	13.7192
0.15415	90.664	13.5809	13.5809
0.154644	90.955	13.3118	13.3118
0.155137	91.245	12.8527	12.8527
0.155632	91.536	12.2339	12.2339
0.156127	91.827	11.7392	11.7392
0.15662	92.117	11.175	11.175
0.157115	92.408	10.4099	10.4099
0.157608	92.698	9.831	9.831
0.158103	92.989	9.364	9.364
0.158597	93.28	8.6833	8.6833
0.15909	93.57	8.2724	8.2724
0.159585	93.861	7.8671	7.8671
0.160078	94.151	7.5348	7.5348
0.160573	94.442	7.2233	7.2233
0.161068	94.733	7.0708	7.0708
0.161561	95.023	7.0017	7.0017
0.162056	95.314	6.9248	6.9248
0.162549	95.604	6.715	6.715
0.163043	95.895	6.6571	6.6571
0.163538	96.186	6.5949	6.5949
0.164031	96.476	6.6555	6.6555
0.164526	96.767	6.5425	6.5425
0.165019	97.057	6.6492	6.6492
0.165514	97.348	6.7085	6.7085
0.166007	97.638	6.8375	6.8375
0.166502	97.929	6.8192	6.8192
0.166997	98.22	6.8247	6.8247
0.16749	98.51	6.7031	6.7031
0.167984	98.801	6.5507	6.5507
0.168477	99.091	6.3818	6.3818
0.168972	99.382	6.1731	6.1731
0.169467	99.673	5.9671	5.9671
0.16996	99.963	5.6797	5.6797
0.170455	100.254	5.588	5.588
0.170948	100.544	5.396	5.396
0.171443	100.835	5.0994	5.0994
0.171937	101.126	4.9848	4.9848
0.17243	101.416	4.9985	4.9985
0.172925	101.707	4.8322	4.8322
0.173418	101.997	4.9218	4.9218
0.173913	102.288	4.9671	4.9671
0.174408	102.579	5.0172	5.0172
0.174901	102.869	4.9749	4.9749
0.175396	103.16	5.1154	5.1154
0.175889	103.45	5.092	5.092
0.176383	103.741	5.1363	5.1363
0.176877	104.031	5.1332	5.1332
0.177371	104.322	5.1186	5.1186
0.177866	104.613	5.2311	5.2311
0.178359	104.903	5.2204	5.2204
0.178854	105.194	5.2351	5.2351
0.179347	105.484	5.2744	5.2744
0.179842	105.775	5.0775	5.0775
0.180337	106.066	5.1768	5.1768
0.18083	106.356	5.2057	5.2057
0.181324	106.647	5.2282	5.2282
0.181817	106.937	5.2791	5.2791
0.182312	107.228	5.4134	5.4134
0.182807	107.519	5.5567	5.5567
0.1833	107.809	5.5834	5.5834
0.183795	108.1	5.7051	5.7051
0.184288	108.39	5.6506	5.6506
0.184783	108.681	5.6011	5.6011
0.185277	108.972	5.4895	5.4895
0.18577	109.262	5.4484	5.4484
0.186265	109.553	5.3434	5.3434
0.186758	109.843	5.2491	5.2491
0.187253	110.134	5.162	5.162
0.187746	110.424	5.144	5.144
0.188241	110.715	5.2188	5.2188
0.188736	111.006	5.3377	5.3377
0.189229	111.296	5.3018	5.3018
0.189723	111.587	5.244	5.244
0.190217	111.877	5.2279	5.2279
0.190711	112.168	5.2022	5.2022
0.191206	112.459	5.2109	5.2109
0.191699	112.749	5.2084	5.2084
0.192194	113.04	5.248	5.248
0.192687	113.33	5.232	5.232
0.193182	113.621	5.29	5.29
0.193677	113.912	5.3988	5.3988
0.19417	114.202	5.3497	5.3497
0.194664	114.493	5.4672	5.4672
0.195157	114.783	5.5802	5.5802
0.195652	115.074	5.5992	5.5992
0.196145	115.364	5.7595	5.7595
0.19664	115.655	5.8644	5.8644
0.197135	115.946	5.9434	5.9434
0.197628	116.236	6.0934	6.0934
0.198123	116.527	6.063	6.063
0.198616	116.817	6.0785	6.0785
0.19911	117.108	6.2754	6.2754
0.199605	117.399	6.1674	6.1674
0.200098	117.689	6.211	6.211
0.200593	117.98	6.2479	6.2479
0.201086	118.27	6.3265	6.3265
0.201581	118.561	6.2694	6.2694
0.202076	118.852	6.2776	6.2776
0.202569	119.142	6.2952	6.2952
0.203063	119.433	6.1597	6.1597
0.203557	119.723	6.191	6.191
0.204051	120.014	6.1234	6.1234
0.204546	120.305	6.2637	6.2637
0.205039	120.595	6.3499	6.3499
0.205534	120.886	6.5424	6.5424
0.206027	121.176	6.6413	6.6413
0.206522	121.467	6.7112	6.7112
0.207015	121.757	6.628	6.628
0.20751	122.048	6.6743	6.6743
0.208004	122.339	6.6985	6.6985
0.208497	122.629	6.7889	6.7889
0.208992	122.92	6.8029	6.8029
0.209485	123.21	6.842	6.842
0.20998	123.501	6.7669	6.7669
0.210475	123.792	6.4247	6.4247
0.210968	124.082	6.229	6.229
0.211463	124.373	6.0299	6.0299
0.211956	124.663	5.8258	5.8258
0.21245	124.954	5.5815	5.5815
0.212945	125.245	5.6321	5.6321
0.213438	125.535	5.6987	5.6987
0.213933	125.826	5.8731	5.8731
0.214426	126.116	5.8492	5.8492
0.214921	126.407	5.9803	5.9803
0.215416	126.698	5.991	5.991
0.215909	126.988	6.1809	6.1809
0.216403	127.279	6.1763	6.1763
0.216897	127.569	6.1545	6.1545
0.217391	127.86	6.1289	6.1289
0.217884	128.15	6.0593	6.0593
0.218379	128.441	5.8151	5.8151
0.218874	128.732	5.7148	5.7148
0.219367	129.022	5.6681	5.6681
0.219862	129.313	5.8825	5.8825
0.220355	129.603	5.8895	5.8895
0.22085	129.894	5.9248	5.9248
0.221344	130.185	5.9841	5.9841
0.221837	130.475	6.0639	6.0639
0.222332	130.766	6.0297	6.0297
0.222825	131.056	5.9907	5.9907
0.22332	131.347	6.0656	6.0656
0.223815	131.638	6.102	6.102
0.224308	131.928	6.0089	6.0089
0.224803	132.219	5.9999	5.9999
0.225296	132.509	5.931	5.931
0.22579	132.8	5.986	5.986
0.226285	133.091	5.9567	5.9567
0.226778	133.381	6.0011	6.0011
0.227273	133.672	5.9916	5.9916
0.227766	133.962	6.0632	6.0632
0.228261	134.253	6.1767	6.1767
0.228754	134.543	6.2013	6.2013
0.229249	134.834	6.2619	6.2619
0.229743	135.125	6.2769	6.2769
0.230237	135.415	6.3034	6.3034
0.230731	135.706	6.152	6.152
0.231224	135.996	6.1038	6.1038
0.231719	136.287	5.9811	5.9811
0.232214	136.578	6.0102	6.0102
0.232707	136.868	5.9982	5.9982
0.233202	137.159	5.8775	5.8775
0.233695	137.449	5.9095	5.9095
0.23419	137.74	5.9594	5.9594
0.234684	138.031	5.7477	5.7477
0.235177	138.321	5.7085	5.7085
0.235672	138.612	5.6829	5.6829
0.236165	138.902	5.7593	5.7593
0.23666	139.193	5.8291	5.8291
0.237155	139.484	5.7251	5.7251
0.237648	139.774	5.7426	5.7426
0.238143	140.065	5.6963	5.6963
0.238636	140.355	5.571	5.571
0.23913	140.646	5.6114	5.6114
0.239624	140.936	5.5582	5.5582
0.240118	141.227	5.6477	5.6477
0.240613	141.518	5.7436	5.7436
0.241106	141.808	5.8862	5.8862
0.241601	142.099	6.0337	6.0337
0.242094	142.389	6.1854	6.1854
0.242589	142.68	6.4242	6.4242
0.243083	142.971	6.4228	6.4228
0.243577	143.261	6.334	6.334
0.244071	143.552	6.1443	6.1443
0.244564	143.842	6.121	6.121
0.245059	144.133	5.8676	5.8676
0.245554	144.424	5.7479	5.7479
0.246047	144.714	5.7307	5.7307
0.246542	145.005	5.6998	5.6998
0.247035	145.295	5.8946	5.8946
0.24753	145.586	6.0836	6.0836
0.248024	145.877	6.0577	6.0577
0.248517	146.167	6.2684	6.2684
0.249012	146.458	6.4278	6.4278
0.249505	146.748	6.473	6.473
0.25	147.039	6.6243	6.6243
0.250493	147.329	6.6119	6.6119
0.250988	147.62	6.5957	6.5957
0.251483	147.911	6.3772	6.3772
0.251976	148.201	6.3404	6.3404
0.25247	148.492	6.3078	6.3078
0.252963	148.782	6.2624	6.2624
0.253458	149.073	6.4269	6.4269
0.253953	149.364	6.4652	6.4652
0.254446	149.654	6.3765	6.3765
0.254941	149.945	6.2743	6.2743
0.255434	150.235	6.2305	6.2305
0.255929	150.526	6.1706	6.1706
0.256423	150.817	6.1246	6.1246
0.256917	151.107	6.064	6.064
0.257411	151.398	6.1334	6.1334
0.257904	151.688	6.1595	6.1595
0.258399	151.979	6.0784	6.0784
0.258894	152.27	5.9407	5.9407
0.259387	152.56	5.9393	5.9393
0.259882	152.851	5.9166	5.9166
0.260375	153.141	5.7929	5.7929
0.26087	153.432	5.7572	5.7572
0.261363	153.722	5.6669	5.6669
0.261857	154.013	5.6457	5.6457
0.262352	154.304	5.652	5.652
0.262845	154.594	5.4438	5.4438
0.26334	154.885	5.4685	5.4685
0.263833	155.175	5.4797	5.4797
0.264328	155.466	5.5346	5.5346
0.264823	155.757	5.5283	5.5283
0.265316	156.047	5.5956	5.5956
0.26581	156.338	5.6786	5.6786
0.266303	156.628	5.6744	5.6744
0.266798	156.919	5.6546	5.6546
0.267293	157.21	5.5839	5.5839
0.267786	157.5	5.5504	5.5504
0.268281	157.791	5.4715	5.4715
0.268774	158.081	5.4113	5.4113
0.269269	158.372	5.4698	5.4698
0.269763	158.663	5.3818	5.3818
0.270257	158.953	5.3974	5.3974
0.270751	159.244	5.4772	5.4772
0.271244	159.534	5.5804	5.5804
0.271739	159.825	5.6649	5.6649
0.272232	160.115	5.7341	5.7341
0.272727	160.406	5.6737	5.6737
0.273222	160.697	5.7833	5.7833
0.273715	160.987	5.851	5.851
0.27421	161.278	5.7442	5.7442
0.274703	161.568	5.6341	5.6341
0.275197	161.859	5.6581	5.6581
0.275692	162.15	5.6672	5.6672
0.276185	162.44	5.7164	5.7164
0.27668	162.731	5.7856	5.7856
0.277173	163.021	5.6925	5.6925
0.277668	163.312	5.6208	5.6208
0.278163	163.603	5.5125	5.5125
0.278656	163.893	5.4057	5.4057
0.27915	164.184	5.4561	5.4561
0.279643	164.474	5.3307	5.3307
0.280138	164.765	5.4402	5.4402
0.280631	165.055	5.4179	5.4179
0.281126	165.346	5.585	5.585
0.281621	165.637	5.5826	5.5826
0.282114	165.927	5.7171	5.7171
0.282609	166.218	5.784	5.784
0.283102	166.508	5.8955	5.8955
0.283597	166.799	5.8454	5.8454
0.284091	167.09	5.9298	5.9298
0.284584	167.38	5.9231	5.9231
0.285079	167.671	5.7421	5.7421
0.285572	167.961	5.6894	5.6894
0.286067	168.252	5.5586	5.5586
0.286562	168.543	5.5865	5.5865
0.287055	168.833	5.5016	5.5016
0.28755	169.124	5.3142	5.3142
0.288043	169.414	5.4205	5.4205
0.288537	169.705	5.5015	5.5015
0.289032	169.996	5.361	5.361
0.289525	170.286	5.2825	5.2825
0.29002	170.577	5.3497	5.3497
0.290513	170.867	5.3598	5.3598
0.291008	171.158	5.454	5.454
0.291503	171.449	5.5554	5.5554
0.291996	171.739	5.6674	5.6674
0.29249	172.03	5.8746	5.8746
0.292983	172.32	5.9275	5.9275
0.293478	172.611	5.9336	5.9336
0.293971	172.901	5.9792	5.9792
0.294466	173.192	5.9747	5.9747
0.294961	173.483	5.763	5.763
0.295454	173.773	5.6333	5.6333
0.295949	174.064	5.559	5.559
0.296442	174.354	5.4557	5.4557
0.296937	174.645	5.3903	5.3903
0.297431	174.936	5.1738	5.1738
0.297924	175.226	5.0914	5.0914
0.298419	175.517	4.9971	4.9971
0.298912	175.807	5.0743	5.0743
0.299407	176.098	4.998	4.998
0.299902	176.389	4.8743	4.8743
0.300395	176.679	4.786	4.786
0.30089	176.97	4.6726	4.6726
0.301383	177.26	4.5647	4.5647
0.301877	177.551	4.5098	4.5098
0.30237	177.841	4.373	4.373
0.302865	178.132	4.2592	4.2592
0.30336	178.423	4.153	4.153
0.303853	178.713	4.0938	4.0938
0.304348	179.004	4.1611	4.1611
0.304841	179.294	4.2557	4.2557
0.305336	179.585	4.3741	4.3741
0.30583	179.876	4.3972	4.3972
0.306323	180.166	4.4347	4.4347
0.306818	180.457	4.4775	4.4775
0.307311	180.747	4.4219	4.4219
0.307806	181.038	4.4851	4.4851
0.308301	181.329	4.6305	4.6305
0.308794	181.619	4.6823	4.6823
0.309289	181.91	4.6337	4.6337
0.309782	182.2	4.6893	4.6893
0.310277	182.491	4.6542	4.6542
0.310771	182.782	4.7804	4.7804
0.311264	183.072	4.8816	4.8816
0.311759	183.363	4.9671	4.9671
0.312252	183.653	5.0117	5.0117
0.312747	183.944	5.2028	5.2028
0.31324	184.234	5.4305	5.4305
0.313735	184.525	5.7043	5.7043
0.31423	184.816	5.8843	5.8843
0.314723	185.106	5.8528	5.8528
0.315217	185.397	5.9468	5.9468
0.31571	185.687	6.0006	6.0006
0.316205	185.978	6.0144	6.0144
0.3167	186.269	6.0634	6.0634
0.317193	186.559	6.1009	6.1009
0.317688	186.85	6.148	6.148
0.318181	187.14	6.1065	6.1065
0.318676	187.431	6.096	6.096
0.31917	187.722	6.0372	6.0372
0.319663	188.012	6.2129	6.2129
0.320158	188.303	6.2636	6.2636
0.320651	188.593	6.3047	6.3047
0.321146	188.884	6.3566	6.3566
0.321641	189.175	6.115	6.115
0.322134	189.465	6.0903	6.0903
0.322629	189.756	6.1187	6.1187
0.323122	190.046	6.2847	6.2847
0.323617	190.337	6.5108	6.5108
0.32411	190.627	6.8552	6.8552
0.324604	190.918	7.0379	7.0379
0.325099	191.209	7.2699	7.2699
0.325592	191.499	7.6781	7.6781
0.326087	191.79	8.1598	8.1598
0.32658	192.08	8.6036	8.6036
0.327075	192.371	9.0535	9.0535
0.32757	192.662	9.3157	9.3157
0.328063	192.952	9.4839	9.4839
0.328557	193.243	9.8443	9.8443
0.32905	193.533	10.1479	10.1479
0.329545	193.824	10.2127	10.2127
0.33004	194.115	10.617	10.617
0.330533	194.405	11.0396	11.0396
0.331028	194.696	10.8414	10.8414
0.331521	194.986	10.7048	10.7048
0.332016	195.277	10.351	10.351
0.33251	195.568	10.0125	10.0125
0.333003	195.858	9.6902	9.6902
0.333498	196.149	9.3052	9.3052
0.333991	196.439	9.0868	9.0868
0.334486	196.73	8.8443	8.8443
0.334979	197.02	8.8365	8.8365
0.335474	197.311	8.8218	8.8218
0.335969	197.602	8.8074	8.8074
0.336462	197.892	8.9247	8.9247
0.336957	198.183	8.8153	8.8153
0.33745	198.473	8.8778	8.8778
0.337944	198.764	8.8049	8.8049
0.338439	199.055	8.9422	8.9422
0.338932	199.345	8.9414	8.9414
0.339427	199.636	8.9938	8.9938
0.33992	199.926	9.282	9.282
0.340415	200.217	9.3728	9.3728
0.34091	200.508	9.4795	9.4795
0.341403	200.798	9.6344	9.6344
0.341897	201.089	9.8129	9.8129
0.34239	201.379	9.7994	9.7994
0.342885	201.67	10.1481	10.1481
0.34338	201.961	10.2836	10.2836
0.343873	202.251	10.2637	10.2637
0.344368	202.542	10.5421	10.5421
0.344861	202.832	10.6998	10.6998
0.345356	203.123	10.6467	10.6467
0.345849	203.413	10.4848	10.4848
0.346343	203.704	10.5119	10.5119
0.346838	203.995	10.4174	10.4174
0.347331	204.285	10.2991	10.2991
0.347826	204.576	10.2218	10.2218
0.348319	204.866	10.1266	10.1266
0.348814	205.157	10.1077	10.1077
0.349309	205.448	9.8027	9.8027
0.349802	205.738	9.5597	9.5597
0.350297	206.029	9.5471	9.5471
0.35079	206.319	9.2398	9.2398
0.351284	206.61	8.7573	8.7573
0.351779	206.901	8.4259	8.4259
0.352272	207.191	8.0983	8.0983
0.352767	207.482	7.8041	7.8041
0.35326	207.772	7.5065	7.5065
0.353755	208.063	7.2709	7.2709
0.35425	208.354	7.0334	7.0334
0.354743	208.644	6.9017	6.9017
0.355237	208.935	6.691	6.691
0.35573	209.225	6.4242	6.4242
0.356225	209.516	6.3079	6.3079
0.356718	209.806	6.1829	6.1829
0.357213	210.097	6.1512	6.1512
0.357708	210.388	6.0624	6.0624
0.358201	210.678	5.9248	5.9248
0.358696	210.969	5.8453	5.8453
0.359189	211.259	5.9111	5.9111
0.359683	211.55	5.917	5.917
0.360178	211.841	5.8729	5.8729
0.360671	212.131	5.8868	5.8868
0.361166	212.422	5.9354	5.9354
0.361659	212.712	6.0353	6.0353
0.362154	213.003	6.0566	6.0566
0.362649	213.294	6.0558	6.0558
0.363142	213.584	6.0461	6.0461
0.363637	213.875	6.0576	6.0576
0.36413	214.165	5.8913	5.8913
0.364624	214.456	5.7584	5.7584
0.365119	214.747	5.6615	5.6615
0.365612	215.037	5.4957	5.4957
0.366107	215.328	5.4035	5.4035
0.3666	215.618	5.3658	5.3658
0.367095	215.909	5.3236	5.3236
0.367588	216.199	5.4603	5.4603
0.368083	216.49	5.3189	5.3189
0.368577	216.781	5.3431	5.3431
0.36907	217.071	5.343	5.343
0.369565	217.362	5.3685	5.3685
0.370058	217.652	5.3314	5.3314
0.370553	217.943	5.1937	5.1937
0.371048	218.234	5.391	5.391
0.371541	218.524	5.4677	5.4677
0.372036	218.815	5.4959	5.4959
0.372529	219.105	5.4878	5.4878
0.373023	219.396	5.5056	5.5056
0.373518	219.687	5.6185	5.6185
0.374011	219.977	5.7071	5.7071
0.374506	220.268	5.7321	5.7321
0.374999	220.558	5.6175	5.6175
0.375494	220.849	5.6177	5.6177
0.375987	221.139	5.6474	5.6474
0.376482	221.43	5.5182	5.5182
0.376977	221.721	5.3793	5.3793
0.37747	222.011	5.3794	5.3794
0.377964	222.302	5.2805	5.2805
0.378457	222.592	5.2494	5.2494
0.378952	222.883	5.295	5.295
0.379447	223.174	5.2066	5.2066
0.37994	223.464	5.2279	5.2279
0.380435	223.755	5.059	5.059
0.380928	224.045	5.0789	5.0789
0.381423	224.336	5.0526	5.0526
0.381917	224.627	5.1561	5.1561
0.38241	224.917	5.0904	5.0904
0.382905	225.208	4.9699	4.9699
0.383398	225.498	4.8944	4.8944
0.383893	225.789	4.8004	4.8004
0.384388	226.08	4.7453	4.7453
0.384881	226.37	4.7488	4.7488
0.385376	226.661	4.6523	4.6523
0.385869	226.951	4.6058	4.6058
0.386363	227.242	4.5717	4.5717
0.386858	227.533	4.4673	4.4673
0.387351	227.823	4.4151	4.4151
0.387846	228.114	4.3292	4.3292
0.388339	228.404	4.3717	4.3717
0.388834	228.695	4.2877	4.2877
0.389327	228.985	4.2896	4.2896
0.389822	229.276	4.2545	4.2545
0.390317	229.567	4.2815	4.2815
0.39081	229.857	4.3233	4.3233
0.391304	230.148	4.3919	4.3919
0.391797	230.438	4.329	4.329
0.392292	230.729	4.3866	4.3866
0.392787	231.02	4.2808	4.2808
0.39328	231.31	4.3721	4.3721
0.393775	231.601	4.3435	4.3435
0.394268	231.891	4.3492	4.3492
0.394763	232.182	4.3156	4.3156
0.395257	232.473	4.339	4.339
0.39575	232.763	4.4954	4.4954
0.396245	233.054	4.5061	4.5061
0.396738	233.344	4.5091	4.5091
0.397233	233.635	4.47	4.47
0.397726	233.925	4.5411	4.5411
0.398221	234.216	4.5067	4.5067
0.398716	234.507	4.3953	4.3953
0.399209	234.797	4.3654	4.3654
0.399703	235.088	4.3928	4.3928
0.400197	235.378	4.2866	4.2866
0.400691	235.669	4.3374	4.3374
0.401186	235.96	4.3516	4.3516
0.401679	236.25	4.4441	4.4441
0.402174	236.541	4.4481	4.4481
0.402667	236.831	4.409	4.409
0.403162	237.122	4.4427	4.4427
0.403657	237.413	4.3739	4.3739
0.40415	237.703	4.5256	4.5256
0.404644	237.994	4.4708	4.4708
0.405137	238.284	4.5605	4.5605
0.405632	238.575	4.5507	4.5507
0.406127	238.866	4.545	4.545
0.40662	239.156	4.7376	4.7376
0.407115	239.447	4.775	4.775
0.407608	239.737	4.806	4.806
0.408103	240.028	4.838	4.838
0.408596	240.318	5.1321	5.1321
0.40909	240.609	5.3249	5.3249
0.409585	240.9	5.5066	5.5066
0.410078	241.19	5.8097	5.8097
0.410573	241.481	5.8207	5.8207
0.411066	241.771	5.9916	5.9916
0.411561	242.062	6.2366	6.2366
0.412056	242.353	6.6264	6.6264
0.412549	242.643	6.9889	6.9889
0.413043	242.934	7.2023	7.2023
0.413537	243.224	7.5164	7.5164
0.414031	243.515	8.0014	8.0014
0.414526	243.806	8.3962	8.3962
0.415019	244.096	8.747	8.747
0.415514	244.387	9.2273	9.2273
0.416007	244.677	9.4219	9.4219
0.416502	244.968	9.7227	9.7227
0.416997	245.259	9.6905	9.6905
0.41749	245.549	9.6508	9.6508
0.417984	245.84	9.7717	9.7717
0.418477	246.13	9.6307	9.6307
0.418972	246.421	9.6315	9.6315
0.419465	246.711	9.557	9.557
0.41996	247.002	9.5986	9.5986
0.420455	247.293	9.6777	9.6777
0.420948	247.583	9.8325	9.8325
0.421443	247.874	9.8814	9.8814
0.421936	248.164	9.8009	9.8009
0.42243	248.455	9.7093	9.7093
0.422925	248.746	9.6289	9.6289
0.423418	249.036	9.6897	9.6897
0.423913	249.327	9.8753	9.8753
0.424406	249.617	10.0256	10.0256
0.424901	249.908	10.1063	10.1063
0.425396	250.199	10.0565	10.0565
0.425889	250.489	10.008	10.008
0.426383	250.78	9.8004	9.8004
0.426877	251.07	9.772	9.772
0.427371	251.361	9.7454	9.7454
0.427866	251.652	9.5894	9.5894
0.428359	251.942	9.4103	9.4103
0.428854	252.233	9.4389	9.4389
0.429347	252.523	9.2514	9.2514
0.429842	252.814	9.1388	9.1388
0.430335	253.104	8.7765	8.7765
0.43083	253.395	8.721	8.721
0.431324	253.686	8.6113	8.6113
0.431817	253.976	8.1883	8.1883
0.432312	254.267	8.0584	8.0584
0.432805	254.557	8.0732	8.0732
0.4333	254.848	7.8216	7.8216
0.433795	255.139	7.4424	7.4424
0.434288	255.429	7.3393	7.3393
0.434783	255.72	7.1395	7.1395
0.435276	256.01	6.8995	6.8995
0.43577	256.301	6.8206	6.8206
0.436265	256.592	6.6271	6.6271
0.436758	256.882	6.5495	6.5495
0.437253	257.173	6.4187	6.4187
0.437746	257.463	6.3505	6.3505
0.438241	257.754	6.2527	6.2527
0.438736	258.045	6.255	6.255
0.439229	258.335	6.226	6.226
0.439723	258.626	6.1579	6.1579
0.440217	258.916	6.0358	6.0358
0.440711	259.207	6.0219	6.0219
0.441204	259.497	6.0296	6.0296
0.441699	259.788	6.0395	6.0395
0.442194	260.079	6.0792	6.0792
0.442687	260.369	6.1337	6.1337
0.443182	260.66	6.124	6.124
0.443675	260.95	6.1659	6.1659
0.44417	261.241	6.0238	6.0238
0.444664	261.532	6.0659	6.0659
0.445157	261.822	6.0023	6.0023
0.445652	262.113	5.9694	5.9694
0.446145	262.403	5.8671	5.8671
0.44664	262.694	5.8552	5.8552
0.447135	262.985	5.6932	5.6932
0.447628	263.275	5.5581	5.5581
0.448123	263.566	5.6375	5.6375
0.448616	263.856	5.672	5.672
0.44911	264.147	5.3579	5.3579
0.449605	264.438	5.2687	5.2687
0.450098	264.728	5.3696	5.3696
0.450593	265.019	5.2822	5.2822
0.451086	265.309	5.324	5.324
0.451581	265.6	5.4495	5.4495
0.452074	265.89	5.3722	5.3722
0.452569	266.181	5.2973	5.2973
0.453063	266.472	5.221	5.221
0.453557	266.762	5.1515	5.1515
0.454051	267.053	5.1866	5.1866
0.454544	267.343	5.1847	5.1847
0.455039	267.634	5.2513	5.2513
0.455534	267.925	5.2509	5.2509
0.456027	268.215	5.3063	5.3063
0.456522	268.506	5.2445	5.2445
0.457015	268.796	5.2968	5.2968
0.45751	269.087	5.2565	5.2565
0.458004	269.378	5.3313	5.3313
0.458497	269.668	5.2983	5.2983
0.458992	269.959	5.3912	5.3912
0.459485	270.249	5.3515	5.3515
0.45998	270.54	5.492	5.492
0.460475	270.831	5.5503	5.5503
0.460968	271.121	5.5621	5.5621
0.461463	271.412	5.7269	5.7269
0.461956	271.702	5.8033	5.8033
0.46245	271.993	5.8785	5.8785
0.462944	272.283	5.9867	5.9867
0.463438	272.574	6.0654	6.0654
0.463933	272.865	6.0232	6.0232
0.464426	273.155	5.9704	5.9704
0.464921	273.446	6.0536	6.0536
0.465414	273.736	6.1804	6.1804
0.465909	274.027	6.1826	6.1826
0.466403	274.318	6.3416	6.3416
0.466897	274.608	6.3215	6.3215
0.467391	274.899	6.3118	6.3118
0.467884	275.189	6.4407	6.4407
0.468379	275.48	6.2458	6.2458
0.468874	275.771	6.3044	6.3044
0.469367	276.061	6.2867	6.2867
0.469862	276.352	6.2563	6.2563
0.470355	276.642	6.1799	6.1799
0.47085	276.933	6.0866	6.0866
0.471344	277.224	6.0715	6.0715
0.471837	277.514	6.1415	6.1415
0.472332	277.805	5.9907	5.9907
0.472825	278.095	6.0274	6.0274
0.47332	278.386	5.954	5.954
0.473813	278.676	6.0253	6.0253
0.474308	278.967	6.0755	6.0755
0.474803	279.258	5.9737	5.9737
0.475296	279.548	5.9555	5.9555
0.47579	279.839	5.9923	5.9923
0.476284	280.129	5.9973	5.9973
0.476778	280.42	5.9019	5.9019
0.477273	280.711	5.9565	5.9565
0.477766	281.001	5.8927	5.8927
0.478261	281.292	5.9784	5.9784
0.478754	281.582	5.9007	5.9007
0.479249	281.873	5.8866	5.8866
0.479743	282.164	5.8438	5.8438
0.480237	282.454	5.8611	5.8611
0.480731	282.745	5.7093	5.7093
0.481224	283.035	5.7073	5.7073
0.481719	283.326	5.7034	5.7034
0.482212	283.616	5.7091	5.7091
0.482707	283.907	5.8839	5.8839
0.483202	284.198	5.971	5.971
0.483695	284.488	6.1586	6.1586
0.48419	284.779	6.1304	6.1304
0.484683	285.069	6.3514	6.3514
0.485177	285.36	6.6269	6.6269
0.485672	285.651	6.6952	6.6952
0.486165	285.941	6.8528	6.8528
0.48666	286.232	6.6538	6.6538
0.487153	286.522	6.7539	6.7539
0.487648	286.813	6.9145	6.9145
0.488143	287.104	6.898	6.898
0.488636	287.394	6.9588	6.9588
0.48913	287.685	7.0823	7.0823
0.489624	287.975	7.078	7.078
0.490118	288.266	7.0504	7.0504
0.490613	288.557	7.1691	7.1691
0.491106	288.847	7.1484	7.1484
0.491601	289.138	7.1481	7.1481
0.492094	289.428	7.2264	7.2264
0.492589	289.719	7.4057	7.4057
0.493082	290.009	7.4772	7.4772
0.493577	290.3	7.4728	7.4728
0.494071	290.591	7.3248	7.3248
0.494564	290.881	7.421	7.421
0.495059	291.172	7.4934	7.4934
0.495552	291.462	7.4636	7.4636
0.496047	291.753	7.0905	7.0905
0.496542	292.044	7.0565	7.0565
0.497035	292.334	6.8847	6.8847
0.49753	292.625	6.797	6.797
0.498023	292.915	6.5418	6.5418
0.498517	293.206	6.2687	6.2687
0.499012	293.497	6.1589	6.1589
0.499505	293.787	6.0373	6.0373
0.5	294.078	5.946	5.946
0.500493	294.368	5.9475	5.9475
0.500988	294.659	5.86	5.86
0.501483	294.95	5.6569	5.6569
0.501976	295.24	5.6569	5.6569
0.50247	295.531	5.6169	5.6169
0.502963	295.821	5.4562	5.4562
0.503458	296.112	5.4918	5.4918
0.503951	296.402	5.3808	5.3808
0.504446	296.693	5.4058	5.4058
0.504941	296.984	5.3698	5.3698
0.505434	297.274	5.2356	5.2356
0.505929	297.565	5.2787	5.2787
0.506422	297.855	5.296	5.296
0.506917	298.146	5.1645	5.1645
0.507411	298.437	5.115	5.115
0.507904	298.727	5.026	5.026
0.508399	299.018	5.086	5.086
0.508892	299.308	5.088	5.088
0.509387	299.599	5.1722	5.1722
0.509882	299.89	5.2514	5.2514
0.510375	300.18	5.2844	5.2844
0.51087	300.471	5.2684	5.2684
0.511363	300.761	5.3877	5.3877
0.511857	301.052	5.3859	5.3859
0.512352	301.343	5.5424	5.5424
0.512845	301.633	5.7764	5.7764
0.51334	301.924	5.7947	5.7947
0.513833	302.214	5.9022	5.9022
0.514328	302.505	6.0926	6.0926
0.514821	302.795	6.113	6.113
0.515316	303.086	6.3428	6.3428
0.51581	303.377	6.2901	6.2901
0.516303	303.667	6.3503	6.3503
0.516798	303.958	6.467	6.467
0.517291	304.248	6.5093	6.5093
0.517786	304.539	6.5692	6.5692
0.518281	304.83	6.4905	6.4905
0.518774	305.12	6.4	6.4
0.519269	305.411	6.5793	6.5793
0.519762	305.701	6.5876	6.5876
0.520257	305.992	6.5126	6.5126
0.520751	306.283	6.5275	6.5275
0.521244	306.573	6.4526	6.4526
0.521739	306.864	6.3791	6.3791
0.522232	307.154	6.3303	6.3303
0.522727	307.445	6.183	6.183
0.523222	307.736	6.0527	6.0527
0.523715	308.026	5.9646	5.9646
0.52421	308.317	5.9095	5.9095
0.524703	308.607	5.9413	5.9413
0.525197	308.898	5.9597	5.9597
0.52569	309.188	5.7154	5.7154
0.526185	309.479	5.6192	5.6192
0.52668	309.77	5.6009	5.6009
0.527173	310.06	5.5464	5.5464
0.527668	310.351	5.3957	5.3957
0.528161	310.641	5.3964	5.3964
0.528656	310.932	5.4306	5.4306
0.52915	311.223	5.4036	5.4036
0.529643	311.513	5.5063	5.5063
0.530138	311.804	5.4776	5.4776
0.530631	312.094	5.6041	5.6041
0.531126	312.385	5.642	5.642
0.531621	312.676	5.5412	5.5412
0.532114	312.966	5.6526	5.6526
0.532609	313.257	5.9184	5.9184
0.533102	313.547	6.0009	6.0009
0.533597	313.838	6.0971	6.0971
0.534091	314.129	6.2508	6.2508
0.534584	314.419	6.5048	6.5048
0.535079	314.71	6.52	6.52
0.535572	315	6.7163	6.7163
0.536067	315.291	6.8298	6.8298
0.53656	315.581	7.0868	7.0868
0.537055	315.872	7.3414	7.3414
0.53755	316.163	7.6197	7.6197
0.538043	316.453	7.886	7.886
0.538537	316.744	7.9528	7.9528
0.53903	317.034	7.9785	7.9785
0.539525	317.325	8.1279	8.1279
0.54002	317.616	8.272	8.272
0.540513	317.906	8.281	8.281
0.541008	318.197	8.254	8.254
0.541501	318.487	8.5259	8.5259
0.541996	318.778	8.5758	8.5758
0.54249	319.069	8.6447	8.6447
0.542983	319.359	8.7215	8.7215
0.543478	319.65	8.8532	8.8532
0.543971	319.94	8.6711	8.6711
0.544466	320.231	8.671	8.671
0.544961	320.522	8.551	8.551
0.545454	320.812	8.5444	8.5444
0.545949	321.103	8.6898	8.6898
0.546442	321.393	8.7521	8.7521
0.546937	321.684	8.7219	8.7219
0.54743	321.974	8.5765	8.5765
0.547924	322.265	8.4508	8.4508
0.548419	322.556	8.3507	8.3507
0.548912	322.846	8.1658	8.1658
0.549407	323.137	8.1484	8.1484
0.5499	323.427	8.1082	8.1082
0.550395	323.718	8.084	8.084
0.55089	324.009	8.1356	8.1356
0.551383	324.299	8.246	8.246
0.551877	324.59	8.3796	8.3796
0.55237	324.88	8.581	8.581
0.552865	325.171	8.6627	8.6627
0.55336	325.462	8.796	8.796
0.553853	325.752	8.9173	8.9173
0.554348	326.043	9.0097	9.0097
0.554841	326.333	9.1015	9.1015
0.555336	326.624	9.1857	9.1857
0.555829	326.914	9.2301	9.2301
0.556323	327.205	9.0919	9.0919
0.556818	327.496	8.969	8.969
0.557311	327.786	8.8548	8.8548
0.557806	328.077	8.9469	8.9469
0.558299	328.367	8.8829	8.8829
0.558794	328.658	8.7599	8.7599
0.559289	328.949	8.6646	8.6646
0.559782	329.239	8.5036	8.5036
0.560277	329.53	8.3887	8.3887
0.56077	329.82	8.2786	8.2786
0.561264	330.111	8.1232	8.1232
0.561759	330.402	8.0631	8.0631
0.562252	330.692	7.896	7.896
0.562747	330.983	7.8393	7.8393
0.56324	331.273	7.7792	7.7792
0.563735	331.564	7.6008	7.6008
0.56423	331.855	7.4953	7.4953
0.564723	332.145	7.3892	7.3892
0.565217	332.436	7.458	7.458
0.56571	332.726	7.3997	7.3997
0.566205	333.017	7.3822	7.3822
0.566698	333.307	7.1703	7.1703
0.567193	333.598	7.0552	7.0552
0.567688	333.889	6.7854	6.7854
0.568181	334.179	6.7091	6.7091
0.568676	334.47	6.5318	6.5318
0.569169	334.76	6.2551	6.2551
0.569663	335.051	6.0356	6.0356
0.570158	335.342	5.8452	5.8452
0.570651	335.632	5.76	5.76
0.571146	335.923	5.5866	5.5866
0.571639	336.213	5.5027	5.5027
0.572134	336.504	5.4237	5.4237
0.572629	336.795	5.365	5.365
0.573122	337.085	5.3035	5.3035
0.573617	337.376	5.2578	5.2578
0.57411	337.666	5.3162	5.3162
0.574604	337.957	5.3787	5.3787
0.575099	338.248	5.4303	5.4303
0.575592	338.538	5.3671	5.3671
0.576087	338.829	5.3642	5.3642
0.57658	339.119	5.2466	5.2466
0.577075	339.41	5.1697	5.1697
0.57757	339.701	5.2337	5.2337
0.578063	339.991	5.1617	5.1617
0.578557	340.282	5.1155	5.1155
0.57905	340.572	5.086	5.086
0.579545	340.863	5.1031	5.1031
0.580038	341.153	5.1767	5.1767
0.580533	341.444	5.2428	5.2428
0.581028	341.735	5.2085	5.2085
0.581521	342.025	5.2937	5.2937
0.582016	342.316	5.218	5.218
0.582509	342.606	5.1334	5.1334
0.583003	342.897	5.1673	5.1673
0.583498	343.188	5.1492	5.1492
0.583991	343.478	5.1377	5.1377
0.584486	343.769	5.1381	5.1381
0.584979	344.059	5.1175	5.1175
0.585474	344.35	5.0005	5.0005
0.585969	344.641	4.9954	4.9954
0.586462	344.931	4.911	4.911
0.586957	345.222	4.9002	4.9002
0.58745	345.512	4.9931	4.9931
0.587944	345.803	5.0003	5.0003
0.588437	346.093	4.9354	4.9354
0.588932	346.384	4.9565	4.9565
0.589427	346.675	4.8046	4.8046
0.58992	346.965	4.8645	4.8645
0.590415	347.256	4.8048	4.8048
0.590908	347.546	4.6483	4.6483
0.591403	347.837	4.6036	4.6036
0.591897	348.128	4.4352	4.4352
0.59239	348.418	4.3978	4.3978
0.592885	348.709	4.3552	4.3552
0.593378	348.999	4.3046	4.3046
0.593873	349.29	4.2163	4.2163
0.594368	349.581	4.0726	4.0726
0.594861	349.871	4.0125	4.0125
0.595356	350.162	4.0706	4.0706
0.595849	350.452	4.0662	4.0662
0.596343	350.743	4.0011	4.0011
0.596838	351.034	3.9883	3.9883
0.597331	351.324	3.9714	3.9714
0.597826	351.615	4.0069	4.0069
0.598319	351.905	4.1442	4.1442
0.598814	352.196	4.2233	4.2233
0.599307	352.486	4.3356	4.3356
0.599802	352.777	4.3582	4.3582
0.600297	353.068	4.5359	4.5359
0.60079	353.358	4.6358	4.6358
0.601284	353.649	4.7028	4.7028
0.601777	353.939	4.9219	4.9219
0.602272	354.23	5.0543	5.0543
0.602767	354.521	5.071	5.071
0.60326	354.811	5.214	5.214
0.603755	355.102	5.2624	5.2624
0.604248	355.392	5.4452	5.4452
0.604743	355.683	5.4772	5.4772
0.605237	355.974	5.4928	5.4928
0.60573	356.264	5.5017	5.5017
0.606225	356.555	5.6056	5.6056
0.606718	356.845	5.6928	5.6928
0.607213	357.136	5.7228	5.7228
0.607708	357.427	5.6495	5.6495
0.608201	357.717	5.7414	5.7414
0.608696	358.008	5.6342	5.6342
0.609189	358.298	5.5549	5.5549
0.609683	358.589	5.6581	5.6581
0.610177	358.879	5.55	5.55
0.610671	359.17	5.4836	5.4836
0.611166	359.461	5.4409	5.4409
0.611659	359.751	5.5633	5.5633
0.612154	360.042	5.6858	5.6858
0.612647	360.332	5.7403	5.7403
0.613142	360.623	5.7852	5.7852
0.613637	360.914	5.732	5.732
0.61413	361.204	5.6452	5.6452
0.614624	361.495	5.6012	5.6012
0.615117	361.785	5.5246	5.5246
0.615612	362.076	5.5061	5.5061
0.616107	362.367	5.5316	5.5316
0.6166	362.657	5.4058	5.4058
0.617095	362.948	5.3757	5.3757
0.617588	363.238	5.286	5.286
0.618083	363.529	5.2632	5.2632
0.618577	363.82	5.24	5.24
0.61907	364.11	5.2932	5.2932
0.619565	364.401	5.4249	5.4249
0.620058	364.691	5.4395	5.4395
0.620553	364.982	5.4539	5.4539
0.621046	365.272	5.4479	5.4479
0.621541	365.563	5.5182	5.5182
0.622036	365.854	5.5181	5.5181
0.622529	366.144	5.5591	5.5591
0.623023	366.435	5.6547	5.6547
0.623517	366.725	5.5627	5.5627
0.624011	367.016	5.694	5.694
0.624506	367.307	5.7726	5.7726
0.624999	367.597	5.854	5.854
0.625494	367.888	5.7963	5.7963
0.625987	368.178	5.7415	5.7415
0.626482	368.469	5.8844	5.8844
0.626977	368.76	5.9747	5.9747
0.62747	369.05	5.972	5.972
0.627964	369.341	6.0095	6.0095
0.628457	369.631	6.0259	6.0259
0.628952	369.922	6.1583	6.1583
0.629447	370.213	6.2911	6.2911
0.62994	370.503	6.3569	6.3569
0.630435	370.794	6.4889	6.4889
0.630928	371.084	6.7228	6.7228
0.631423	371.375	6.8131	6.8131
0.631916	371.665	6.8828	6.8828
0.63241	371.956	7.0528	7.0528
0.632905	372.247	7.0557	7.0557
0.633398	372.537	7.1968	7.1968
0.633893	372.828	7.2016	7.2016
0.634386	373.118	7.171	7.171
0.634881	373.409	7.105	7.105
0.635376	373.7	7.061	7.061
0.635869	373.99	6.9175	6.9175
0.636363	374.281	6.8303	6.8303
0.636857	374.571	6.8792	6.8792
0.637351	374.862	6.8683	6.8683
0.637846	375.153	6.7935	6.7935
0.638339	375.443	6.7008	6.7008
0.638834	375.734	6.7053	6.7053
0.639327	376.024	6.6064	6.6064
0.639822	376.315	6.5149	6.5149
0.640315	376.605	6.6966	6.6966
0.64081	376.896	6.7707	6.7707
0.641304	377.187	6.6478	6.6478
0.641797	377.477	6.928	6.928
0.642292	377.768	6.9129	6.9129
0.642785	378.058	7.0253	7.0253
0.64328	378.349	7.3406	7.3406
0.643775	378.64	7.5887	7.5887
0.644268	378.93	7.6017	7.6017
0.644763	379.221	7.8602	7.8602
0.645256	379.511	7.9221	7.9221
0.64575	379.802	8.0512	8.0512
0.646245	380.093	8.2039	8.2039
0.646738	380.383	8.2051	8.2051
0.647233	380.674	8.2386	8.2386
0.647726	380.964	8.3287	8.3287
0.648221	381.255	8.5528	8.5528
0.648716	381.546	8.6581	8.6581
0.649209	381.836	8.7263	8.7263
0.649703	382.127	8.6168	8.6168
0.650197	382.417	8.5808	8.5808
0.650691	382.708	8.3627	8.3627
0.651186	382.999	8.4596	8.4596
0.651679	383.289	8.2601	8.2601
0.652174	383.58	8.1283	8.1283
0.652667	383.87	7.967	7.967
0.653162	384.161	7.7579	7.7579
0.653655	384.451	7.7686	7.7686
0.65415	384.742	7.6114	7.6114
0.654644	385.033	7.3876	7.3876
0.655137	385.323	7.3108	7.3108
0.655632	385.614	7.2324	7.2324
0.656125	385.904	7.1465	7.1465
0.65662	386.195	6.9118	6.9118
0.657115	386.486	6.8196	6.8196
0.657608	386.776	6.5742	6.5742
0.658103	387.067	6.3046	6.3046
0.658596	387.357	6.2149	6.2149
0.65909	387.648	6.1396	6.1396
0.659585	387.939	6.0935	6.0935
0.660078	388.229	5.8791	5.8791
0.660573	388.52	5.8175	5.8175
0.661066	388.81	5.6974	5.6974
0.661561	389.101	5.6056	5.6056
0.662056	389.392	5.4956	5.4956
0.662549	389.682	5.4493	5.4493
0.663043	389.973	5.3167	5.3167
0.663537	390.263	5.4085	5.4085
0.664031	390.554	5.2854	5.2854
0.664524	390.844	5.1135	5.1135
0.665019	391.135	5.1493	5.1493
0.665514	391.426	5.1382	5.1382
0.666007	391.716	5.1711	5.1711
0.666502	392.007	5.2147	5.2147
0.666995	392.297	5.1158	5.1158
0.66749	392.588	5.1943	5.1943
0.667984	392.879	5.1663	5.1663
0.668477	393.169	5.2159	5.2159
0.668972	393.46	5.2327	5.2327
0.669465	393.75	5.3239	5.3239
0.66996	394.041	5.3518	5.3518
0.670455	394.332	5.2634	5.2634
0.670948	394.622	5.4333	5.4333
0.671443	394.913	5.3815	5.3815
0.671936	395.203	5.3463	5.3463
0.67243	395.494	5.4576	5.4576
0.672924	395.784	5.6334	5.6334
0.673418	396.075	5.7758	5.7758
0.673913	396.366	6.1054	6.1054
0.674406	396.656	6.4233	6.4233
0.674901	396.947	6.7083	6.7083
0.675394	397.237	6.8854	6.8854
0.675889	397.528	7.111	7.111
0.676383	397.819	7.5236	7.5236
0.676877	398.109	7.7331	7.7331
0.677371	398.4	7.9234	7.9234
0.677864	398.69	8.16	8.16
0.678359	398.981	8.284	8.284
0.678854	399.272	8.6117	8.6117
0.679347	399.562	8.7596	8.7596
0.679842	399.853	9.1606	9.1606
0.680335	400.143	9.4368	9.4368
0.68083	400.434	9.5552	9.5552
0.681324	400.725	10.0036	10.0036
0.681817	401.015	10.1143	10.1143
0.682312	401.306	10.2371	10.2371
0.682805	401.596	10.363	10.363
0.6833	401.887	10.6559	10.6559
0.683793	402.177	10.9739	10.9739
0.684288	402.468	10.9949	10.9949
0.684783	402.759	11.0257	11.0257
0.685276	403.049	11.2512	11.2512
0.68577	403.34	11.3123	11.3123
0.686264	403.63	11.5715	11.5715
0.686758	403.921	11.7074	11.7074
0.687253	404.212	11.7984	11.7984
0.687746	404.502	11.9198	11.9198
0.688241	404.793	12.0182	12.0182
0.688734	405.083	12.2741	12.2741
0.689229	405.374	12.1505	12.1505
0.689723	405.665	12.4427	12.4427
0.690217	405.955	12.4909	12.4909
0.690711	406.246	12.5764	12.5764
0.691204	406.536	12.51	12.51
0.691699	406.827	12.4709	12.4709
0.692194	407.118	12.3111	12.3111
0.692687	407.408	12.3309	12.3309
0.693182	407.699	12.1189	12.1189
0.693675	407.989	11.8737	11.8737
0.69417	408.28	11.6161	11.6161
0.694663	408.57	11.5382	11.5382
0.695157	408.861	11.0507	11.0507
0.695652	409.152	10.9114	10.9114
0.696145	409.442	10.9637	10.9637
0.69664	409.733	10.9257	10.9257
0.697133	410.023	10.895	10.895
0.697628	410.314	10.9817	10.9817
0.698123	410.605	11.0841	11.0841
0.698616	410.895	11.1958	11.1958
0.69911	411.186	11.5354	11.5354
0.699604	411.476	11.4852	11.4852
0.700098	411.767	11.55	11.55
0.700593	412.058	11.8714	11.8714
0.701086	412.348	12.0839	12.0839
0.701581	412.639	12.4119	12.4119
0.702074	412.929	12.8093	12.8093
0.702569	413.22	13.1745	13.1745
0.703063	413.511	13.4635	13.4635
0.703557	413.801	13.6312	13.6312
0.704051	414.092	13.9672	13.9672
0.704544	414.382	14.0111	14.0111
0.705039	414.673	14.3105	14.3105
0.705532	414.963	14.7456	14.7456
0.706027	415.254	15.004	15.004
0.706522	415.545	15.2414	15.2414
0.707015	415.835	15.5372	15.5372
0.70751	416.126	15.831	15.831
0.708003	416.416	15.8654	15.8654
0.708497	416.707	16.04	16.04
0.708992	416.998	16.3078	16.3078
0.709485	417.288	16.5832	16.5832
0.70998	417.579	16.2686	16.2686
0.710473	417.869	16.2181	16.2181
0.710968	418.16	16.2687	16.2687
0.711463	418.451	16.1819	16.1819
0.711956	418.741	16.1214	16.1214
0.71245	419.032	15.7527	15.7527
0.712944	419.322	15.5995	15.5995
0.713438	419.613	15.4996	15.4996
0.713933	419.904	15.2953	15.2953
0.714426	420.194	15.5287	15.5287
0.714921	420.485	15.2012	15.2012
0.715414	420.775	15.2665	15.2665
0.715909	421.066	15.1408	15.1408
0.716402	421.356	14.8442	14.8442
0.716897	421.647	14.462	14.462
0.717391	421.938	14.3973	14.3973
0.717884	422.228	14.194	14.194
0.718379	422.519	14.1637	14.1637
0.718872	422.809	14.0662	14.0662
0.719367	423.1	14.3089	14.3089
0.719862	423.391	14.1534	14.1534
0.720355	423.681	13.9836	13.9836
0.72085	423.972	14.2283	14.2283
0.721343	424.262	14.397	14.397
0.721837	424.553	14.509	14.509
0.722332	424.844	14.828	14.828
0.722825	425.134	14.7063	14.7063
0.72332	425.425	15.0296	15.0296
0.723813	425.715	14.9668	14.9668
0.724308	426.006	14.9269	14.9269
0.724803	426.297	15.2172	15.2172
0.725296	426.587	15.0343	15.0343
0.72579	426.878	14.9816	14.9816
0.726284	427.168	14.7853	14.7853
0.726778	427.459	15.0527	15.0527
0.727271	427.749	15.0687	15.0687
0.727766	428.04	14.8078	14.8078
0.728261	428.331	14.9214	14.9214
0.728754	428.621	14.7668	14.7668
0.729249	428.912	14.7141	14.7141
0.729742	429.202	14.4865	14.4865
0.730237	429.493	14.4789	14.4789
0.730731	429.784	14.5618	14.5618
0.731224	430.074	14.5021	14.5021
0.731719	430.365	14.5255	14.5255
0.732212	430.655	14.6141	14.6141
0.732707	430.946	14.6411	14.6411
0.733202	431.237	14.6258	14.6258
0.733695	431.527	14.4397	14.4397
0.73419	431.818	14.2804	14.2804
0.734683	432.108	14.1575	14.1575
0.735177	432.399	14.1385	14.1385
0.735672	432.69	13.9626	13.9626
0.736165	432.98	13.8538	13.8538
0.73666	433.271	13.7105	13.7105
0.737153	433.561	13.5624	13.5624
0.737648	433.852	13.3567	13.3567
0.738141	434.142	13.2529	13.2529
0.738636	434.433	13.1844	13.1844
0.73913	434.724	13.1206	13.1206
0.739624	435.014	13.1591	13.1591
0.740118	435.305	12.9929	12.9929
0.740611	435.595	12.8221	12.8221
0.741106	435.886	12.8706	12.8706
0.741601	436.177	12.6966	12.6966
0.742094	436.467	12.539	12.539
0.742589	436.758	12.6354	12.6354
0.743082	437.048	12.6844	12.6844
0.743577	437.339	12.6656	12.6656
0.744071	437.63	12.5309	12.5309
0.744564	437.92	12.4386	12.4386
0.745059	438.211	12.325	12.325
0.745552	438.501	12.1513	12.1513
0.746047	438.792	12.1266	12.1266
0.74654	439.082	11.9642	11.9642
0.747035	439.373	11.8188	11.8188
0.74753	439.664	11.7698	11.7698
0.748023	439.954	11.6164	11.6164
0.748517	440.245	11.4434	11.4434
0.74901	440.535	11.2331	11.2331
0.749505	440.826	10.9242	10.9242
0.75	441.117	10.6661	10.6661
0.750493	441.407	10.7364	10.7364
0.750988	441.698	10.5059	10.5059
0.751481	441.988	10.3319	10.3319
0.751976	442.279	10.3668	10.3668
0.75247	442.57	10.2322	10.2322
0.752963	442.86	10.2145	10.2145
0.753458	443.151	10.1488	10.1488
0.753951	443.441	10.0057	10.0057
0.754446	443.732	10.0073	10.0073
0.754941	444.023	9.9459	9.9459
0.755434	444.313	9.9523	9.9523
0.755929	444.604	9.9981	9.9981
0.756422	444.894	9.9466	9.9466
0.756917	445.185	10.0115	10.0115
0.75741	445.475	10.0623	10.0623
0.757904	445.766	10.2291	10.2291
0.758399	446.057	10.3278	10.3278
0.758892	446.347	10.3092	10.3092
0.759387	446.638	10.4202	10.4202
0.75988	446.928	10.5372	10.5372
0.760375	447.219	10.4149	10.4149
0.76087	447.51	10.443	10.443
0.761363	447.8	10.4219	10.4219
0.761857	448.091	10.5708	10.5708
0.76235	448.381	10.5261	10.5261
0.762845	448.672	10.6927	10.6927
0.76334	448.963	10.7293	10.7293
0.763833	449.253	10.7859	10.7859
0.764328	449.544	11.0216	11.0216
0.764821	449.834	10.9129	10.9129
0.765316	450.125	10.9938	10.9938
0.76581	450.416	10.9063	10.9063
0.766303	450.706	10.9023	10.9023
0.766798	450.997	10.8755	10.8755
0.767291	451.287	10.9111	10.9111
0.767786	451.578	10.9708	10.9708
0.768279	451.868	10.8578	10.8578
0.768774	452.159	10.7833	10.7833
0.769269	452.45	10.7151	10.7151
0.769762	452.74	10.7743	10.7743
0.770257	453.031	10.5456	10.5456
0.77075	453.321	10.5316	10.5316
0.771244	453.612	10.601	10.601
0.771739	453.903	10.6836	10.6836
0.772232	454.193	10.5666	10.5666
0.772727	454.484	10.4357	10.4357
0.77322	454.774	10.4422	10.4422
0.773715	455.065	10.4372	10.4372
0.77421	455.356	10.1786	10.1786
0.774703	455.646	9.9983	9.9983
0.775197	455.937	9.961	9.961
0.77569	456.227	10.0009	10.0009
0.776185	456.518	9.8757	9.8757
0.77668	456.809	9.8645	9.8645
0.777173	457.099	9.7506	9.7506
0.777668	457.39	9.8997	9.8997
0.778161	457.68	9.939	9.939
0.778656	457.971	10.0136	10.0136
0.779149	458.261	10.1445	10.1445
0.779643	458.552	10.0494	10.0494
0.780138	458.843	9.8975	9.8975
0.780631	459.133	10.2232	10.2232
0.781126	459.424	10.1963	10.1963
0.781619	459.714	10.1719	10.1719
0.782114	460.005	10.2005	10.2005
0.782609	460.296	10.0664	10.0664
0.783102	460.586	9.9397	9.9397
0.783597	460.877	9.9922	9.9922
0.78409	461.167	9.9847	9.9847
0.784584	461.458	10.0183	10.0183
0.785079	461.749	10.0826	10.0826
0.785572	462.039	10.1514	10.1514
0.786067	462.33	10.2895	10.2895
0.78656	462.62	10.2877	10.2877
0.787055	462.911	10.3597	10.3597
0.78755	463.202	10.3367	10.3367
0.788043	463.492	10.3746	10.3746
0.788537	463.783	10.2638	10.2638
0.78903	464.073	10.396	10.396
0.789525	464.364	10.4668	10.4668
0.790018	464.654	10.4246	10.4246
0.790513	464.945	10.3453	10.3453
0.791008	465.236	10.4676	10.4676
0.791501	465.526	10.3987	10.3987
0.791996	465.817	10.5223	10.5223
0.792489	466.107	10.5294	10.5294
0.792983	466.398	10.4613	10.4613
0.793478	466.689	10.4882	10.4882
0.793971	466.979	10.3708	10.3708
0.794466	467.27	10.2761	10.2761
0.794959	467.56	10.1194	10.1194
0.795454	467.851	9.9911	9.9911
0.795949	468.142	9.9588	9.9588
0.796442	468.432	9.898	9.898
0.796937	468.723	9.8328	9.8328
0.79743	469.013	9.568	9.568
0.797924	469.304	9.7026	9.7026
0.798419	469.595	9.6004	9.6004
0.798912	469.885	9.5337	9.5337
0.799407	470.176	9.4319	9.4319
0.7999	470.466	9.4487	9.4487
0.800395	470.757	9.3812	9.3812
0.800888	471.047	9.3841	9.3841
0.801383	471.338	9.333	9.333
0.801877	471.629	9.2927	9.2927
0.80237	471.919	9.3468	9.3468
0.802865	472.21	9.4351	9.4351
0.803358	472.5	9.2881	9.2881
0.803853	472.791	9.2727	9.2727
0.804348	473.082	9.3319	9.3319
0.804841	473.372	9.228	9.228
0.805336	473.663	9.0786	9.0786
0.805829	473.953	9.0897	9.0897
0.806323	474.244	9.0681	9.0681
0.806818	474.535	8.8398	8.8398
0.807311	474.825	8.6761	8.6761
0.807806	475.116	8.7514	8.7514
0.808299	475.406	8.8756	8.8756
0.808794	475.697	8.8192	8.8192
0.809289	475.988	8.6136	8.6136
0.809782	476.278	8.7135	8.7135
0.810277	476.569	8.7626	8.7626
0.81077	476.859	8.7214	8.7214
0.811264	477.15	8.646	8.646
0.811757	477.44	8.7868	8.7868
0.812252	477.731	8.8336	8.8336
0.812747	478.022	8.714	8.714
0.81324	478.312	8.7009	8.7009
0.813735	478.603	8.6605	8.6605
0.814228	478.893	8.6529	8.6529
0.814723	479.184	8.5915	8.5915
0.815217	479.475	8.738	8.738
0.81571	479.765	8.7136	8.7136
0.816205	480.056	8.523	8.523
0.816698	480.346	8.5558	8.5558
0.817193	480.637	8.6821	8.6821
0.817688	480.928	8.6545	8.6545
0.818181	481.218	8.5287	8.5287
0.818676	481.509	8.4968	8.4968
0.819169	481.799	8.55	8.55
0.819663	482.09	8.6963	8.6963
0.820158	482.381	8.6127	8.6127
0.820651	482.671	8.6524	8.6524
0.821146	482.962	8.7647	8.7647
0.821639	483.252	8.7873	8.7873
0.822134	483.543	8.7351	8.7351
0.822627	483.833	8.8137	8.8137
0.823122	484.124	8.8477	8.8477
0.823617	484.415	8.8758	8.8758
0.82411	484.705	8.8732	8.8732
0.824604	484.996	8.7758	8.7758
0.825097	485.286	8.738	8.738
0.825592	485.577	8.5686	8.5686
0.826087	485.868	8.6076	8.6076
0.82658	486.158	8.5725	8.5725
0.827075	486.449	8.5761	8.5761
0.827568	486.739	8.5725	8.5725
0.828063	487.03	8.4549	8.4549
0.828557	487.321	8.3255	8.3255
0.82905	487.611	8.3455	8.3455
0.829545	487.902	8.397	8.397
0.830038	488.192	8.4057	8.4057
0.830533	488.483	8.1609	8.1609
0.831026	488.773	8.197	8.197
0.831521	489.064	8.2608	8.2608
0.832016	489.355	8.0954	8.0954
0.832509	489.645	7.9956	7.9956
0.833003	489.936	7.9067	7.9067
0.833497	490.226	7.7024	7.7024
0.833991	490.517	7.5313	7.5313
0.834486	490.808	7.5386	7.5386
0.834979	491.098	7.3555	7.3555
0.835474	491.389	7.294	7.294
0.835967	491.679	7.1866	7.1866
0.836462	491.97	7.057	7.057
0.836957	492.261	6.9795	6.9795
0.83745	492.551	6.9137	6.9137
0.837944	492.842	6.7914	6.7914
0.838437	493.132	6.7632	6.7632
0.838932	493.423	6.8566	6.8566
0.839427	493.714	6.739	6.739
0.83992	494.004	6.6996	6.6996
0.840415	494.295	6.6769	6.6769
0.840908	494.585	6.7141	6.7141
0.841403	494.876	6.7023	6.7023
0.841897	495.167	6.7312	6.7312
0.84239	495.457	6.7616	6.7616
0.842885	495.748	6.6917	6.6917
0.843378	496.038	6.6835	6.6835
0.843873	496.329	6.6554	6.6554
0.844366	496.619	6.6942	6.6942
0.844861	496.91	6.7666	6.7666
0.845356	497.201	6.7883	6.7883
0.845849	497.491	6.7669	6.7669
0.846343	497.782	6.7183	6.7183
0.846837	498.072	6.6606	6.6606
0.847331	498.363	6.687	6.687
0.847826	498.654	6.6765	6.6765
0.848319	498.944	6.6714	6.6714
0.848814	499.235	6.6453	6.6453
0.849307	499.525	6.6944	6.6944
0.849802	499.816	6.671	6.671
0.850297	500.107	6.6985	6.6985
0.85079	500.397	6.7002	6.7002
0.851284	500.688	6.7166	6.7166
0.851777	500.978	6.7144	6.7144
0.852272	501.269	6.822	6.822
0.852767	501.56	6.7962	6.7962
0.85326	501.85	7.0924	7.0924
0.853755	502.141	7.1099	7.1099
0.854248	502.431	7.0554	7.0554
0.854743	502.722	7.0787	7.0787
0.855236	503.012	7.1691	7.1691
0.85573	503.303	7.1514	7.1514
0.856225	503.594	7.0539	7.0539
0.856718	503.884	7.2313	7.2313
0.857213	504.175	7.1522	7.1522
0.857706	504.465	7.106	7.106
0.858201	504.756	6.9299	6.9299
0.858696	505.047	6.8533	6.8533
0.859189	505.337	6.763	6.763
0.859683	505.628	6.6483	6.6483
0.860177	505.918	6.6019	6.6019
0.860671	506.209	6.5345	6.5345
0.861166	506.5	6.4459	6.4459
0.861659	506.79	6.4276	6.4276
0.862154	507.081	6.3891	6.3891
0.862647	507.371	6.2747	6.2747
0.863142	507.662	6.304	6.304
0.863635	507.952	6.202	6.202
0.86413	508.243	6.1457	6.1457
0.864624	508.534	6.0574	6.0574
0.865117	508.824	5.9498	5.9498
0.865612	509.115	5.8937	5.8937
0.866105	509.405	5.9741	5.9741
0.8666	509.696	5.8002	5.8002
0.867095	509.987	5.6571	5.6571
0.867588	510.277	5.637	5.637
0.868083	510.568	5.5417	5.5417
0.868576	510.858	5.371	5.371
0.86907	511.149	5.3902	5.3902
0.869565	511.44	5.3193	5.3193
0.870058	511.73	5.3033	5.3033
0.870553	512.021	5.2053	5.2053
0.871046	512.311	5.2339	5.2339
0.871541	512.602	5.076	5.076
0.872036	512.893	5.0054	5.0054
0.872529	513.183	5.0484	5.0484
0.873023	513.474	4.9936	4.9936
0.873517	513.764	5.0081	5.0081
0.874011	514.055	4.9906	4.9906
0.874504	514.345	5.0958	5.0958
0.874999	514.636	5.1653	5.1653
0.875494	514.927	5.1402	5.1402
0.875987	515.217	5.0843	5.0843
0.876482	515.508	5.0577	5.0577
0.876975	515.798	4.965	4.965
0.87747	516.089	4.9871	4.9871
0.877964	516.38	4.9935	4.9935
0.878457	516.67	4.946	4.946
0.878952	516.961	5.1435	5.1435
0.879445	517.251	5.0638	5.0638
0.87994	517.542	4.9673	4.9673
0.880435	517.833	5.0573	5.0573
0.880928	518.123	4.8708	4.8708
0.881423	518.414	4.7308	4.7308
0.881916	518.704	4.7903	4.7903
0.88241	518.995	4.7162	4.7162
0.882905	519.286	4.7649	4.7649
0.883398	519.576	4.7735	4.7735
0.883893	519.867	4.7747	4.7747
0.884386	520.157	4.822	4.822
0.884881	520.448	4.7799	4.7799
0.885374	520.738	4.6346	4.6346
0.885869	521.029	4.6987	4.6987
0.886363	521.32	4.8011	4.8011
0.886857	521.61	4.899	4.899
0.887351	521.901	4.9745	4.9745
0.887844	522.191	4.9413	4.9413
0.888339	522.482	4.8811	4.8811
0.888834	522.773	4.833	4.833
0.889327	523.063	4.6637	4.6637
0.889822	523.354	4.4455	4.4455
0.890315	523.644	4.3221	4.3221
0.89081	523.935	4.3978	4.3978
0.891304	524.226	4.3191	4.3191
0.891797	524.516	4.2436	4.2436
0.892292	524.807	4.1624	4.1624
0.892785	525.097	4.0548	4.0548
0.89328	525.388	4.0854	4.0854
0.893775	525.679	3.9938	3.9938
0.894268	525.969	3.9637	3.9637
0.894763	526.26	4.0357	4.0357
0.895256	526.55	4.0107	4.0107
0.89575	526.841	4.0151	4.0151
0.896244	527.131	3.957	3.957
0.896738	527.422	4.0067	4.0067
0.897233	527.713	4.0378	4.0378
0.897726	528.003	3.9978	3.9978
0.898221	528.294	4.0497	4.0497
0.898714	528.584	4.1238	4.1238
0.899209	528.875	4.2247	4.2247
0.899703	529.166	4.2774	4.2774
0.900197	529.456	4.3499	4.3499
0.900691	529.747	4.2993	4.2993
0.901184	530.037	4.3895	4.3895
0.901679	530.328	4.272	4.272
0.902174	530.619	4.3587	4.3587
0.902667	530.909	4.3627	4.3627
0.903162	531.2	4.2732	4.2732
0.903655	531.49	4.341	4.341
0.90415	531.781	4.4522	4.4522
0.904644	532.072	4.4568	4.4568
0.905137	532.362	4.3218	4.3218
0.905632	532.653	4.4109	4.4109
0.906125	532.943	4.4734	4.4734
0.90662	533.234	4.455	4.455
0.907113	533.524	4.5719	4.5719
0.907608	533.815	4.5244	4.5244
0.908103	534.106	4.5389	4.5389
0.908596	534.396	4.5389	4.5389
0.90909	534.687	4.5072	4.5072
0.909584	534.977	4.4481	4.4481
0.910078	535.268	4.3645	4.3645
0.910573	535.559	4.3509	4.3509
0.911066	535.849	4.2843	4.2843
0.911561	536.14	4.3268	4.3268
0.912054	536.43	4.1783	4.1783
0.912549	536.721	4.1446	4.1446
0.913043	537.012	4.2097	4.2097
0.913537	537.302	4.1085	4.1085
0.914031	537.593	4.0639	4.0639
0.914524	537.883	4.0739	4.0739
0.915019	538.174	4.135	4.135
0.915514	538.465	4.0844	4.0844
0.916007	538.755	3.9896	3.9896
0.916502	539.046	4.015	4.015
0.916995	539.336	4.0014	4.0014
0.91749	539.627	3.9659	3.9659
0.917983	539.917	3.7848	3.7848
0.918477	540.208	3.7468	3.7468
0.918972	540.499	3.7073	3.7073
0.919465	540.789	3.7108	3.7108
0.91996	541.08	3.7192	3.7192
0.920453	541.37	3.6672	3.6672
0.920948	541.661	3.7706	3.7706
0.921443	541.952	3.7759	3.7759
0.921936	542.242	3.8291	3.8291
0.92243	542.533	3.8857	3.8857
0.922924	542.823	3.9225	3.9225
0.923418	543.114	3.9188	3.9188
0.923913	543.405	3.9977	3.9977
0.924406	543.695	4.0073	4.0073
0.924901	543.986	4.0109	4.0109
0.925394	544.276	4.0432	4.0432
0.925889	544.567	4.0853	4.0853
0.926382	544.857	4.085	4.085
0.926877	545.148	3.9091	3.9091
0.927371	545.439	3.9737	3.9737
0.927864	545.729	3.7759	3.7759
0.928359	546.02	3.765	3.765
0.928852	546.31	3.6439	3.6439
0.929347	546.601	3.6749	3.6749
0.929842	546.892	3.5631	3.5631
0.930335	547.182	3.5276	3.5276
0.93083	547.473	3.5448	3.5448
0.931323	547.763	3.4669	3.4669
0.931817	548.054	3.5102	3.5102
0.932312	548.345	3.5963	3.5963
0.932805	548.635	3.6145	3.6145
0.9333	548.926	3.6639	3.6639
0.933793	549.216	3.6998	3.6998
0.934288	549.507	3.7685	3.7685
0.934783	549.798	3.6514	3.6514
0.935276	550.088	3.7176	3.7176
0.93577	550.379	3.6694	3.6694
0.936264	550.669	3.65	3.65
0.936758	550.96	3.5073	3.5073
0.937251	551.25	3.5131	3.5131
0.937746	551.541	3.4476	3.4476
0.938241	551.832	3.4909	3.4909
0.938734	552.122	3.5613	3.5613
0.939229	552.413	3.5366	3.5366
0.939722	552.703	3.4933	3.4933
0.940217	552.994	3.4955	3.4955
0.940711	553.285	3.5097	3.5097
0.941204	553.575	3.4291	3.4291
0.941699	553.866	3.3327	3.3327
0.942192	554.156	3.2534	3.2534
0.942687	554.447	3.1949	3.1949
0.943182	554.738	3.1851	3.1851
0.943675	555.028	3.1652	3.1652
0.94417	555.319	3.184	3.184
0.944663	555.609	3.2451	3.2451
0.945157	555.9	3.1875	3.1875
0.945652	556.191	3.1392	3.1392
0.946145	556.481	3.0891	3.0891
0.94664	556.772	3.1356	3.1356
0.947133	557.062	3.1403	3.1403
0.947628	557.353	3.13	3.13
0.948121	557.643	3.1888	3.1888
0.948616	557.934	3.2011	3.2011
0.94911	558.225	3.2076	3.2076
0.949604	558.515	3.0641	3.0641
0.950098	558.806	3.0178	3.0178
0.950591	559.096	2.9516	2.9516
0.951086	559.387	2.9551	2.9551
0.951581	559.678	2.9225	2.9225
0.952074	559.968	2.9484	2.9484
0.952569	560.259	2.9395	2.9395
0.953062	560.549	2.9717	2.9717
0.953557	560.84	2.9154	2.9154
0.954051	561.131	2.9139	2.9139
0.954544	561.421	2.9402	2.9402
0.955039	561.712	2.921	2.921
0.955532	562.002	2.9225	2.9225
0.956027	562.293	2.9394	2.9394
0.956522	562.584	2.9511	2.9511
0.957015	562.874	2.9753	2.9753
0.95751	563.165	2.9338	2.9338
0.958003	563.455	2.9161	2.9161
0.958497	563.746	2.9544	2.9544
0.95899	564.036	2.9559	2.9559
0.959485	564.327	2.8873	2.8873
0.95998	564.618	2.861	2.861
0.960473	564.908	2.8376	2.8376
0.960968	565.199	2.884	2.884
0.961461	565.489	2.8466	2.8466
0.961956	565.78	2.7554	2.7554
0.96245	566.071	2.781	2.781
0.962944	566.361	2.774	2.774
0.963438	566.652	2.7222	2.7222
0.963931	566.942	2.7734	2.7734
0.964426	567.233	2.7332	2.7332
0.964921	567.524	2.7321	2.7321
0.965414	567.814	2.7707	2.7707
0.965909	568.105	2.8478	2.8478
0.966402	568.395	2.8718	2.8718
0.966897	568.686	3.082	3.082
0.967391	568.977	3.2423	3.2423
0.967884	569.267	3.3209	3.3209
0.968379	569.558	3.1705	3.1705
0.968872	569.848	3.0537	3.0537
0.969367	570.139	2.9143	2.9143
0.969862	570.43	2.9061	2.9061
0.970355	570.72	2.7627	2.7627
0.97085	571.011	2.759	2.759
0.971343	571.301	2.8157	2.8157
0.971837	571.592	2.8313	2.8313
0.97233	571.882	2.8814	2.8814
0.972825	572.173	2.8111	2.8111
0.97332	572.464	2.8672	2.8672
0.973813	572.754	2.8502	2.8502
0.974308	573.045	2.8854	2.8854
0.974801	573.335	2.9085	2.9085
0.975296	573.626	2.9105	2.9105
0.97579	573.917	3.0093	3.0093
0.976284	574.207	3.0237	3.0237
0.976778	574.498	3.0146	3.0146
0.977271	574.788	3.0259	3.0259
0.977766	575.079	2.8408	2.8408
0.978261	575.37	2.6059	2.6059
0.978754	575.66	2.5684	2.5684
0.979249	575.951	2.5644	2.5644
0.979742	576.241	2.3984	2.3984
0.980237	576.532	2.3922	2.3922
0.980731	576.823	2.381	2.381
0.981224	577.113	2.3672	2.3672
0.981719	577.404	2.3413	2.3413
0.982212	577.694	2.3713	2.3713
0.982707	577.985	2.3952	2.3952
0.9832	578.275	2.3692	2.3692
0.983695	578.566	2.4895	2.4895
0.98419	578.857	2.5204	2.5204
0.984683	579.147	2.4933	2.4933
0.985177	579.438	2.526	2.526
0.98567	579.728	2.4764	2.4764
0.986165	580.019	2.5	2.5
[truncated: 28 more rows]

## Sheet: 3.26.19 WT
Line width = 300
WT		0-33	0-255
Normalized cortex length	Distance (µm)	GFP Fluorescence Intensity	DAPI Fluorescence Intensity	GFP Fluorescence Intensity AVG
0	0	4.4969	4.4969	3.87364	0.199616
0.000583232	0.291	4.6206	4.6206	2.93059	0.151019
0.00116446	0.581	4.8199	4.8199	4.0955	0.211049
0.00174769	0.872	4.9813	4.9813	8.50573	0.438317
0.00232892	1.162	5.2066	5.2066	19.4055	1
0.00291215	1.453	5.5278	5.5278
0.00349538	1.744	5.7127	5.7127
0.00407661	2.034	5.9007	5.9007
0.00465984	2.325	6.4196	6.4196
0.00524107	2.615	6.5671	6.5671
0.0058243	2.906	6.5815	6.5815
0.00640553	3.196	6.3605	6.3605
0.00698876	3.487	6.1649	6.1649
0.00757199	3.778	6.1342	6.1342
0.00815322	4.068	6.0772	6.0772
0.00873645	4.359	5.8303	5.8303
0.00931768	4.649	5.7202	5.7202
0.00990091	4.94	5.5275	5.5275
0.0104841	5.231	5.4154	5.4154
0.0110654	5.521	5.2896	5.2896
0.0116486	5.812	5.206	5.206
0.0122298	6.102	5.1299	5.1299
0.0128131	6.393	5.1134	5.1134
0.0133963	6.684	5.0442	5.0442
0.0139775	6.974	4.9039	4.9039
0.0145608	7.265	4.7421	4.7421
0.015142	7.555	4.6549	4.6549
0.0157252	7.846	4.5919	4.5919
0.0163084	8.137	4.5193	4.5193
0.0168897	8.427	4.5679	4.5679
0.0174729	8.718	4.5275	4.5275
0.0180541	9.008	4.4596	4.4596
0.0186374	9.299	4.3763	4.3763
0.0192186	9.589	4.4535	4.4535
0.0198018	9.88	4.3393	4.3393
0.0203851	10.171	4.2573	4.2573
0.0209663	10.461	4.2911	4.2911
0.0215495	10.752	4.212	4.212
0.0221307	11.042	4.2659	4.2659
0.022714	11.333	4.2634	4.2634
0.0232972	11.624	4.1396	4.1396
0.0238784	11.914	4.1863	4.1863
0.0244617	12.205	4.2597	4.2597
0.0250429	12.495	4.3699	4.3699
0.0256261	12.786	4.3995	4.3995
0.0262094	13.077	4.4761	4.4761
0.0267906	13.367	4.3513	4.3513
0.0273738	13.658	4.3931	4.3931
0.027955	13.948	4.3169	4.3169
0.0285383	14.239	4.3984	4.3984
0.0291215	14.53	4.3345	4.3345
0.0297027	14.82	4.3909	4.3909
0.030286	15.111	4.4132	4.4132
0.0308672	15.401	4.4088	4.4088
0.0314504	15.692	4.3849	4.3849
0.0320317	15.982	4.3685	4.3685
0.0326149	16.273	4.4112	4.4112
0.0331981	16.564	4.4604	4.4604
0.0337793	16.854	4.485	4.485
0.0343626	17.145	4.5035	4.5035
0.0349438	17.435	4.5966	4.5966
0.035527	17.726	4.6924	4.6924
0.0361103	18.017	4.7207	4.7207
0.0366915	18.307	4.797	4.797
0.0372747	18.598	4.8644	4.8644
0.037856	18.888	4.8928	4.8928
0.0384392	19.179	4.969	4.969
0.0390224	19.47	5.1639	5.1639
0.0396036	19.76	5.1832	5.1832
0.0401869	20.051	5.2374	5.2374
0.0407681	20.341	5.2658	5.2658
0.0413513	20.632	5.471	5.471
0.0419346	20.923	5.7301	5.7301
0.0425158	21.213	5.8139	5.8139
0.043099	21.504	5.7036	5.7036
0.0436803	21.794	5.6597	5.6597
0.0442635	22.085	5.765	5.765
0.0448447	22.375	5.6817	5.6817
0.0454279	22.666	5.6971	5.6971
0.0460112	22.957	5.7233	5.7233
0.0465924	23.247	5.6395	5.6395
0.0471756	23.538	5.6051	5.6051
0.0477569	23.828	5.6641	5.6641
0.0483401	24.119	5.6764	5.6764
0.0489233	24.41	5.5893	5.5893
0.0495046	24.7	5.6123	5.6123
0.0500878	24.991	5.6728	5.6728
0.050669	25.281	5.5379	5.5379
0.0512522	25.572	5.4419	5.4419
0.0518355	25.863	5.4574	5.4574
0.0524167	26.153	5.26	5.26
0.0529999	26.444	5.2374	5.2374
0.0535812	26.734	5.1422	5.1422
0.0541644	27.025	5.1056	5.1056
0.0547476	27.316	5.0617	5.0617
0.0553289	27.606	5.05	5.05
0.0559121	27.897	4.9763	4.9763
0.0564933	28.187	4.9346	4.9346
0.0570765	28.478	4.9	4.9
0.0576578	28.768	4.8405	4.8405
0.058241	29.059	4.7786	4.7786
0.0588242	29.35	4.791	4.791
0.0594055	29.64	4.7355	4.7355
0.0599887	29.931	4.7793	4.7793
0.0605699	30.221	4.7508	4.7508
0.0611532	30.512	4.7603	4.7603
0.0617364	30.803	4.5475	4.5475
0.0623176	31.093	4.5118	4.5118
0.0629008	31.384	4.7124	4.7124
0.0634821	31.674	4.6723	4.6723
0.0640653	31.965	4.6156	4.6156
0.0646485	32.256	4.7046	4.7046
0.0652298	32.546	4.7143	4.7143
0.065813	32.837	4.6662	4.6662
0.0663942	33.127	4.6451	4.6451
0.0669775	33.418	4.726	4.726
0.0675607	33.709	4.6762	4.6762
0.0681419	33.999	4.6916	4.6916
0.0687251	34.29	4.6351	4.6351
0.0693064	34.58	4.5538	4.5538
0.0698896	34.871	4.6392	4.6392
0.0704708	35.161	4.8038	4.8038
0.0710541	35.452	4.8207	4.8207
0.0716373	35.743	4.9192	4.9192
0.0722185	36.033	4.8623	4.8623
0.0728018	36.324	5.0028	5.0028
0.073383	36.614	5.0223	5.0223
0.0739662	36.905	5.0831	5.0831
0.0745494	37.196	5.127	5.127
0.0751307	37.486	4.9025	4.9025
0.0757139	37.777	5.0062	5.0062
0.0762951	38.067	5.1053	5.1053
0.0768784	38.358	5.0094	5.0094
0.0774616	38.649	4.996	4.996
0.0780428	38.939	4.8777	4.8777
0.0786261	39.23	4.9103	4.9103
0.0792073	39.52	4.8985	4.8985
0.0797905	39.811	4.9007	4.9007
0.0803737	40.102	4.8644	4.8644
0.080955	40.392	4.8139	4.8139
0.0815382	40.683	4.706	4.706
0.0821194	40.973	4.6998	4.6998
0.0827027	41.264	4.6478	4.6478
0.0832839	41.554	4.6087	4.6087
0.0838671	41.845	4.6748	4.6748
0.0844504	42.136	4.6711	4.6711
0.0850316	42.426	4.6195	4.6195
0.0856148	42.717	4.4969	4.4969
0.086196	43.007	4.5311	4.5311
0.0867793	43.298	4.4576	4.4576
0.0873625	43.589	4.5306	4.5306
0.0879437	43.879	4.5373	4.5373
0.088527	44.17	4.3748	4.3748
0.0891082	44.46	4.5232	4.5232
0.0896914	44.751	4.5962	4.5962
0.0902747	45.042	4.5191	4.5191
0.0908559	45.332	4.5855	4.5855
0.0914391	45.623	4.591	4.591
0.0920203	45.913	4.6324	4.6324
0.0926036	46.204	4.6241	4.6241
0.0931868	46.495	4.5795	4.5795
0.093768	46.785	4.5639	4.5639
0.0943513	47.076	4.4814	4.4814
0.0949325	47.366	4.4298	4.4298
0.0955157	47.657	4.4541	4.4541
0.096097	47.947	4.4489	4.4489
0.0966802	48.238	4.4485	4.4485
0.0972634	48.529	4.3106	4.3106
0.0978446	48.819	4.3363	4.3363
0.0984279	49.11	4.2322	4.2322
0.0990091	49.4	4.1678	4.1678
0.0995923	49.691	4.1397	4.1397
0.100176	49.982	3.9882	3.9882
0.100757	50.272	3.9737	3.9737
0.10134	50.563	3.9265	3.9265
0.101921	50.853	3.8942	3.8942
0.102504	51.144	3.8498	3.8498
0.103088	51.435	3.7609	3.7609
0.103669	51.725	3.7273	3.7273
0.104252	52.016	3.6516	3.6516
0.104833	52.306	3.647	3.647
0.105417	52.597	3.6663	3.6663
0.106	52.888	3.7116	3.7116
0.106581	53.178	3.6695	3.6695
0.107164	53.469	3.6568	3.6568
0.107746	53.759	3.643	3.643
0.108329	54.05	3.6017	3.6017
0.10891	54.34	3.5876	3.5876
0.109493	54.631	3.567	3.567
0.110076	54.922	3.527	3.527
0.110658	55.212	3.5265	3.5265
0.111241	55.503	3.4623	3.4623
0.111822	55.793	3.4879	3.4879
0.112405	56.084	3.4563	3.4563
0.112989	56.375	3.3896	3.3896
0.11357	56.665	3.3275	3.3275
0.114153	56.956	3.4051	3.4051
0.114734	57.246	3.3445	3.3445
0.115318	57.537	3.3078	3.3078
0.115901	57.828	3.2862	3.2862
0.116482	58.118	3.2223	3.2223
0.117065	58.409	3.3037	3.3037
0.117646	58.699	3.3345	3.3345
0.11823	58.99	3.3449	3.3449
0.118811	59.28	3.3207	3.3207
0.119394	59.571	3.3511	3.3511
0.119977	59.862	3.3987	3.3987
0.120559	60.152	3.3294	3.3294
0.121142	60.443	3.3639	3.3639
0.121723	60.733	3.3165	3.3165
0.122306	61.024	3.3194	3.3194
0.12289	61.315	3.2429	3.2429
0.123471	61.605	3.2643	3.2643
0.124054	61.896	3.2552	3.2552
0.124635	62.186	3.3379	3.3379
0.125218	62.477	3.3423	3.3423
0.125802	62.768	3.3186	3.3186
0.126383	63.058	3.3867	3.3867
0.126966	63.349	3.4023	3.4023
0.127547	63.639	3.3242	3.3242
0.128131	63.93	3.3935	3.3935
0.128714	64.221	3.3746	3.3746
0.129295	64.511	3.409	3.409
0.129878	64.802	3.3377	3.3377
0.13046	65.092	3.2938	3.2938
0.131043	65.383	3.2087	3.2087
0.131624	65.673	3.1384	3.1384
0.132207	65.964	3.0973	3.0973
0.13279	66.255	3.1072	3.1072
0.133372	66.545	3.0496	3.0496
0.133955	66.836	3.0146	3.0146
0.134536	67.126	3.0426	3.0426
0.135119	67.417	3.0245	3.0245
0.135703	67.708	2.9803	2.9803
0.136284	67.998	3.006	3.006
0.136867	68.289	3.0258	3.0258
0.137448	68.579	3.0009	3.0009
0.138032	68.87	2.9856	2.9856
0.138615	69.161	2.9672	2.9672
0.139196	69.451	2.9041	2.9041
0.139779	69.742	2.9511	2.9511
0.14036	70.032	2.943	2.943
0.140944	70.323	2.9593	2.9593
0.141527	70.614	2.954	2.954
0.142108	70.904	2.9534	2.9534
0.142691	71.195	2.9217	2.9217
0.143273	71.485	2.9214	2.9214
0.143856	71.776	2.9645	2.9645
0.144437	72.066	3.0284	3.0284
0.14502	72.357	3.0058	3.0058
0.145604	72.648	2.9985	2.9985
0.146185	72.938	2.9674	2.9674
0.146768	73.229	3.0118	3.0118
0.147349	73.519	2.9898	2.9898
0.147932	73.81	3.0111	3.0111
0.148516	74.101	2.9874	2.9874
0.149097	74.391	2.9875	2.9875
0.14968	74.682	2.987	2.987
0.150261	74.972	3.0398	3.0398
0.150845	75.263	3.0907	3.0907
0.151428	75.554	2.9968	2.9968
0.152009	75.844	3.0585	3.0585
0.152592	76.135	3.0545	3.0545
0.153174	76.425	2.9857	2.9857
0.153757	76.716	3.057	3.057
0.15434	77.007	2.9557	2.9557
0.154921	77.297	2.9146	2.9146
0.155504	77.588	2.9885	2.9885
0.156086	77.878	2.969	2.969
0.156669	78.169	2.9723	2.9723
0.15725	78.459	3.0266	3.0266
0.157833	78.75	2.9979	2.9979
0.158417	79.041	2.9812	2.9812
0.158998	79.331	3.0068	3.0068
0.159581	79.622	3.0721	3.0721
0.160162	79.912	3.015	3.015
0.160745	80.203	2.9775	2.9775
0.161329	80.494	3.0643	3.0643
0.16191	80.784	3.042	3.042
0.162493	81.075	3.0678	3.0678
0.163074	81.365	3.0924	3.0924
0.163658	81.656	3.1514	3.1514
0.164241	81.947	3.2161	3.2161
0.164822	82.237	3.1837	3.1837
0.165405	82.528	3.1644	3.1644
0.165987	82.818	3.2499	3.2499
0.16657	83.109	3.2379	3.2379
0.167153	83.4	3.221	3.221
0.167734	83.69	3.1521	3.1521
0.168317	83.981	3.1279	3.1279
0.168899	84.271	3.0785	3.0785
0.169482	84.562	3.0928	3.0928
0.170063	84.852	3.0821	3.0821
0.170646	85.143	3.1376	3.1376
0.17123	85.434	3.0906	3.0906
0.171811	85.724	3.1075	3.1075
0.172394	86.015	3.173	3.173
0.172975	86.305	3.0915	3.0915
0.173559	86.596	3.0339	3.0339
0.174142	86.887	3.0263	3.0263
0.174723	87.177	3.0577	3.0577
0.175306	87.468	3.0591	3.0591
0.175887	87.758	3.0254	3.0254
0.176471	88.049	3.0954	3.0954
0.177054	88.34	3.128	3.128
0.177635	88.63	3.0779	3.0779
0.178218	88.921	3.1024	3.1024
0.1788	89.211	3.0688	3.0688
0.179383	89.502	3.0809	3.0809
0.179966	89.793	3.1048	3.1048
0.180547	90.083	3.0618	3.0618
0.181131	90.374	3.0478	3.0478
0.181712	90.664	3.1449	3.1449
0.182295	90.955	3.1373	3.1373
0.182876	91.245	3.1022	3.1022
0.183459	91.536	3.1305	3.1305
0.184043	91.827	3.0848	3.0848
0.184624	92.117	3.0691	3.0691
0.185207	92.408	3.1068	3.1068
0.185788	92.698	3.1434	3.1434
0.186372	92.989	3.0942	3.0942
0.186955	93.28	3.1098	3.1098
0.187536	93.57	3.1297	3.1297
0.188119	93.861	3.0856	3.0856
0.188701	94.151	3.1572	3.1572
0.189284	94.442	3.1343	3.1343
0.189867	94.733	3.0262	3.0262
0.190448	95.023	3.0941	3.0941
0.191031	95.314	3.1216	3.1216
0.191613	95.604	3.1733	3.1733
0.192196	95.895	3.2514	3.2514
0.192779	96.186	3.2105	3.2105
0.19336	96.476	3.3586	3.3586
0.193944	96.767	3.3787	3.3787
0.194525	97.057	3.312	3.312
0.195108	97.348	3.3235	3.3235
0.195689	97.638	3.3709	3.3709
0.196273	97.929	3.3784	3.3784
0.196856	98.22	3.3977	3.3977
0.197437	98.51	3.509	3.509
0.19802	98.801	3.5207	3.5207
0.198601	99.091	3.6072	3.6072
0.199185	99.382	3.5961	3.5961
0.199768	99.673	3.6859	3.6859
0.200349	99.963	3.6644	3.6644
0.200932	100.254	3.6151	3.6151
0.201514	100.544	3.6642	3.6642
0.202097	100.835	3.5988	3.5988
0.20268	101.126	3.6279	3.6279
0.203261	101.416	3.5654	3.5654
0.203845	101.707	3.5483	3.5483
0.204426	101.997	3.4726	3.4726
0.205009	102.288	3.414	3.414
0.205592	102.579	3.3696	3.3696
0.206173	102.869	3.3124	3.3124
0.206757	103.16	3.258	3.258
0.207338	103.45	3.2143	3.2143
0.207921	103.741	3.2092	3.2092
0.208502	104.031	3.1638	3.1638
0.209086	104.322	3.0983	3.0983
0.209669	104.613	3.1213	3.1213
0.21025	104.903	3.1231	3.1231
0.210833	105.194	3.1297	3.1297
0.211415	105.484	3.1078	3.1078
0.211998	105.775	3.1329	3.1329
0.212581	106.066	3.1728	3.1728
0.213162	106.356	3.1597	3.1597
0.213745	106.647	3.1579	3.1579
0.214327	106.937	3.1702	3.1702
0.21491	107.228	3.1534	3.1534
0.215493	107.519	3.0911	3.0911
0.216074	107.809	3.1042	3.1042
0.216658	108.1	3.1761	3.1761
0.217239	108.39	3.1561	3.1561
0.217822	108.681	3.1298	3.1298
0.218405	108.972	3.1517	3.1517
0.218986	109.262	3.1745	3.1745
0.21957	109.553	3.165	3.165
0.220151	109.843	3.2124	3.2124
0.220734	110.134	3.1466	3.1466
0.221315	110.424	3.1506	3.1506
0.221899	110.715	3.1675	3.1675
0.222482	111.006	3.0941	3.0941
0.223063	111.296	3.0385	3.0385
0.223646	111.587	3.0611	3.0611
0.224228	111.877	3.1022	3.1022
0.224811	112.168	3.0901	3.0901
0.225394	112.459	3.087	3.087
0.225975	112.749	3.0664	3.0664
0.226558	113.04	3.0157	3.0157
0.22714	113.33	2.9807	2.9807
0.227723	113.621	2.9661	2.9661
0.228306	113.912	3.0462	3.0462
0.228887	114.202	3.0318	3.0318
0.229471	114.493	2.9989	2.9989
0.230052	114.783	2.9575	2.9575
0.230635	115.074	3.0336	3.0336
0.231216	115.364	2.9986	2.9986
0.2318	115.655	3.0478	3.0478
0.232383	115.946	3.0672	3.0672
0.232964	116.236	3.093	3.093
0.233547	116.527	3.1233	3.1233
0.234128	116.817	3.0461	3.0461
0.234712	117.108	3.0708	3.0708
0.235295	117.399	3.0717	3.0717
0.235876	117.689	3.0869	3.0869
0.236459	117.98	3.0688	3.0688
0.237041	118.27	3.1293	3.1293
0.237624	118.561	3.1139	3.1139
0.238207	118.852	3.1196	3.1196
0.238788	119.142	3.0723	3.0723
0.239372	119.433	3.1527	3.1527
0.239953	119.723	3.1633	3.1633
0.240536	120.014	3.165	3.165
0.241119	120.305	3.1648	3.1648
0.2417	120.595	3.1072	3.1072
0.242284	120.886	3.0334	3.0334
0.242865	121.176	3.0695	3.0695
0.243448	121.467	3.0802	3.0802
0.244029	121.757	3.0268	3.0268
0.244613	122.048	3.093	3.093
0.245196	122.339	3.0736	3.0736
0.245777	122.629	3.0519	3.0519
0.24636	122.92	3.0326	3.0326
0.246942	123.21	3.0687	3.0687
0.247525	123.501	3.0575	3.0575
0.248108	123.792	3.0372	3.0372
0.248689	124.082	3.0077	3.0077
0.249272	124.373	3.0454	3.0454
0.249854	124.663	2.9657	2.9657
0.250437	124.954	2.9938	2.9938
0.25102	125.245	3.0371	3.0371
0.251601	125.535	3.0748	3.0748
0.252185	125.826	3.1111	3.1111
0.252766	126.116	3.213	3.213
0.253349	126.407	3.2349	3.2349
0.253932	126.698	3.1553	3.1553
0.254514	126.988	3.2442	3.2442
0.255097	127.279	3.2026	3.2026
0.255678	127.569	3.2176	3.2176
0.256261	127.86	3.1632	3.1632
0.256842	128.15	3.1557	3.1557
0.257426	128.441	3.1368	3.1368
0.258009	128.732	3.1052	3.1052
0.25859	129.022	3.0678	3.0678
0.259173	129.313	3.1098	3.1098
0.259755	129.603	3.0919	3.0919
0.260338	129.894	3.2135	3.2135
0.260921	130.185	3.2081	3.2081
0.261502	130.475	3.1978	3.1978
0.262086	130.766	3.2559	3.2559
0.262667	131.056	3.2667	3.2667
0.26325	131.347	3.2648	3.2648
0.263833	131.638	3.1578	3.1578
0.264414	131.928	3.1812	3.1812
0.264998	132.219	3.1342	3.1342
0.265579	132.509	3.146	3.146
0.266162	132.8	3.1929	3.1929
0.266745	133.091	3.157	3.157
0.267327	133.381	3.1561	3.1561
0.26791	133.672	3.0191	3.0191
0.268491	133.962	3.0954	3.0954
0.269074	134.253	3.0896	3.0896
0.269656	134.543	2.9874	2.9874
0.270239	134.834	2.9475	2.9475
0.270822	135.125	2.9728	2.9728
0.271403	135.415	2.9869	2.9869
0.271986	135.706	2.9932	2.9932
0.272568	135.996	3.0525	3.0525
0.273151	136.287	3.0628	3.0628
0.273734	136.578	2.9896	2.9896
0.274315	136.868	2.9999	2.9999
0.274899	137.159	3.0707	3.0707
0.27548	137.449	3.0938	3.0938
0.276063	137.74	3.0018	3.0018
0.276646	138.031	2.9647	2.9647
0.277228	138.321	2.9608	2.9608
0.277811	138.612	2.9517	2.9517
0.278392	138.902	2.9955	2.9955
0.278975	139.193	2.9395	2.9395
0.279558	139.484	3.0201	3.0201
0.28014	139.774	2.968	2.968
0.280723	140.065	2.9587	2.9587
0.281304	140.355	2.9153	2.9153
0.281887	140.646	2.9584	2.9584
0.282469	140.936	2.9148	2.9148
0.283052	141.227	2.8666	2.8666
0.283635	141.518	2.8514	2.8514
0.284216	141.808	2.8478	2.8478
0.284799	142.099	2.8331	2.8331
0.285381	142.389	2.9207	2.9207
0.285964	142.68	2.8797	2.8797
0.286547	142.971	2.9552	2.9552
0.287128	143.261	2.9225	2.9225
0.287712	143.552	2.9105	2.9105
0.288293	143.842	2.9204	2.9204
0.288876	144.133	2.9052	2.9052
0.289459	144.424	2.895	2.895
0.290041	144.714	2.8373	2.8373
0.290624	145.005	2.8688	2.8688
0.291205	145.295	2.8406	2.8406
0.291788	145.586	2.8084	2.8084
0.292371	145.877	2.8628	2.8628
0.292953	146.167	2.8263	2.8263
0.293536	146.458	2.8469	2.8469
0.294117	146.748	2.8156	2.8156
0.2947	147.039	2.7478	2.7478
0.295282	147.329	2.8005	2.8005
0.295865	147.62	2.8109	2.8109
0.296448	147.911	2.8403	2.8403
0.297029	148.201	2.8942	2.8942
0.297613	148.492	2.8505	2.8505
0.298194	148.782	2.8945	2.8945
0.298777	149.073	2.8282	2.8282
0.29936	149.364	2.8172	2.8172
0.299941	149.654	2.8637	2.8637
0.300525	149.945	2.8566	2.8566
0.301106	150.235	2.7794	2.7794
0.301689	150.526	2.8209	2.8209
0.302272	150.817	2.8803	2.8803
0.302854	151.107	2.9087	2.9087
0.303437	151.398	2.9134	2.9134
0.304018	151.688	2.8604	2.8604
0.304601	151.979	2.8293	2.8293
0.305185	152.27	2.9613	2.9613
0.305766	152.56	3.0269	3.0269
0.306349	152.851	2.9389	2.9389
0.30693	153.141	2.9904	2.9904
0.307513	153.432	3.0368	3.0368
0.308095	153.722	3.0718	3.0718
0.308678	154.013	3.0656	3.0656
0.309261	154.304	3.0821	3.0821
0.309842	154.594	3.0758	3.0758
0.310426	154.885	3.1126	3.1126
0.311007	155.175	3.0583	3.0583
0.31159	155.466	3.0166	3.0166
0.312173	155.757	2.9792	2.9792
0.312755	156.047	2.9997	2.9997
0.313338	156.338	3.017	3.017
0.313919	156.628	3.0444	3.0444
0.314502	156.919	3.06	3.06
0.315085	157.21	3.0556	3.0556
0.315667	157.5	3.0621	3.0621
0.31625	157.791	2.9952	2.9952
0.316831	158.081	2.9652	2.9652
0.317414	158.372	3.068	3.068
0.317998	158.663	2.9601	2.9601
0.318579	158.953	2.9903	2.9903
0.319162	159.244	2.9508	2.9508
0.319743	159.534	2.9492	2.9492
0.320327	159.825	2.9784	2.9784
0.320908	160.115	2.9734	2.9734
0.321491	160.406	2.9711	2.9711
0.322074	160.697	2.9834	2.9834
0.322655	160.987	2.937	2.937
0.323239	161.278	2.9744	2.9744
0.32382	161.568	3.002	3.002
0.324403	161.859	2.9515	2.9515
0.324986	162.15	2.9939	2.9939
0.325568	162.44	2.9751	2.9751
0.326151	162.731	2.9994	2.9994
0.326732	163.021	3.0089	3.0089
0.327315	163.312	3.0504	3.0504
0.327899	163.603	3.0077	3.0077
0.32848	163.893	3.0146	3.0146
0.329063	164.184	3.0158	3.0158
0.329644	164.474	2.9956	2.9956
0.330227	164.765	2.9798	2.9798
0.330809	165.055	2.9997	2.9997
0.331392	165.346	2.9592	2.9592
0.331975	165.637	2.9906	2.9906
0.332556	165.927	2.983	2.983
0.33314	166.218	2.8891	2.8891
0.333721	166.508	2.9555	2.9555
0.334304	166.799	2.9678	2.9678
0.334887	167.09	2.9065	2.9065
0.335469	167.38	2.8992	2.8992
0.336052	167.671	2.9289	2.9289
0.336633	167.961	2.8663	2.8663
0.337216	168.252	2.8429	2.8429
0.337799	168.543	2.83	2.83
0.338381	168.833	2.8631	2.8631
0.338964	169.124	2.8852	2.8852
0.339545	169.414	2.7938	2.7938
0.340128	169.705	2.8264	2.8264
0.340712	169.996	2.8062	2.8062
0.341293	170.286	2.774	2.774
0.341876	170.577	2.7933	2.7933
0.342457	170.867	2.7772	2.7772
0.343041	171.158	2.8134	2.8134
0.343624	171.449	2.7869	2.7869
0.344205	171.739	2.7513	2.7513
0.344788	172.03	2.7105	2.7105
0.345369	172.32	2.7923	2.7923
0.345953	172.611	2.8462	2.8462
0.346534	172.901	2.853	2.853
0.347117	173.192	2.8615	2.8615
0.3477	173.483	2.9166	2.9166
0.348282	173.773	2.9232	2.9232
0.348865	174.064	2.9851	2.9851
0.349446	174.354	3.0404	3.0404
0.350029	174.645	2.9503	2.9503
0.350612	174.936	2.8808	2.8808
0.351194	175.226	2.8746	2.8746
0.351777	175.517	2.8172	2.8172
0.352358	175.807	2.8132	2.8132
0.352941	176.098	2.8152	2.8152
0.353525	176.389	2.7996	2.7996
0.354106	176.679	2.7746	2.7746
0.354689	176.97	2.7729	2.7729
0.35527	177.26	2.7688	2.7688
0.355854	177.551	2.7728	2.7728
0.356435	177.841	2.7544	2.7544
0.357018	178.132	2.7605	2.7605
0.357601	178.423	2.8028	2.8028
0.358182	178.713	2.8158	2.8158
0.358766	179.004	2.7797	2.7797
0.359347	179.294	2.865	2.865
0.35993	179.585	2.846	2.846
0.360513	179.876	2.8257	2.8257
0.361095	180.166	2.8685	2.8685
0.361678	180.457	2.8981	2.8981
0.362259	180.747	2.8664	2.8664
0.362842	181.038	2.876	2.876
0.363426	181.329	2.8232	2.8232
0.364007	181.619	2.8328	2.8328
0.36459	181.91	2.8053	2.8053
0.365171	182.2	2.8253	2.8253
0.365754	182.491	2.7667	2.7667
0.366338	182.782	2.7649	2.7649
0.366919	183.072	2.7373	2.7373
0.367502	183.363	2.7462	2.7462
0.368083	183.653	2.7443	2.7443
0.368667	183.944	2.7496	2.7496
0.369248	184.234	2.7658	2.7658
0.369831	184.525	2.7782	2.7782
0.370414	184.816	2.7514	2.7514
0.370996	185.106	2.7458	2.7458
0.371579	185.397	2.693	2.693
0.37216	185.687	2.7367	2.7367
0.372743	185.978	2.7688	2.7688
0.373326	186.269	2.7367	2.7367
0.373908	186.559	2.7068	2.7068
0.374491	186.85	2.7792	2.7792
0.375072	187.14	2.7576	2.7576
0.375655	187.431	2.7144	2.7144
0.376239	187.722	2.722	2.722
0.37682	188.012	2.7296	2.7296
0.377403	188.303	2.7207	2.7207
0.377984	188.593	2.7401	2.7401
0.378568	188.884	2.6934	2.6934
0.379151	189.175	2.7238	2.7238
0.379732	189.465	2.6872	2.6872
0.380315	189.756	2.7141	2.7141
0.380896	190.046	2.6952	2.6952
0.38148	190.337	2.7044	2.7044
0.382061	190.627	2.6916	2.6916
0.382644	190.918	2.716	2.716
0.383227	191.209	2.7562	2.7562
0.383809	191.499	2.7896	2.7896
0.384392	191.79	2.821	2.821
0.384973	192.08	2.7269	2.7269
0.385556	192.371	2.7091	2.7091
0.38614	192.662	2.7563	2.7563
0.386721	192.952	2.7981	2.7981
0.387304	193.243	2.7439	2.7439
0.387885	193.533	2.7837	2.7837
0.388468	193.824	2.7587	2.7587
0.389052	194.115	2.7773	2.7773
0.389633	194.405	2.869	2.869
0.390216	194.696	2.8145	2.8145
0.390797	194.986	2.9115	2.9115
0.391381	195.277	2.8368	2.8368
0.391964	195.568	2.8126	2.8126
0.392545	195.858	2.8239	2.8239
0.393128	196.149	2.8193	2.8193
0.39371	196.439	2.7765	2.7765
0.394293	196.73	2.8012	2.8012
0.394874	197.02	2.7968	2.7968
0.395457	197.311	2.7131	2.7131
0.39604	197.602	2.7123	2.7123
0.396622	197.892	2.7349	2.7349
0.397205	198.183	2.744	2.744
0.397786	198.473	2.8181	2.8181
0.398369	198.764	2.7652	2.7652
0.398953	199.055	2.721	2.721
0.399534	199.345	2.7509	2.7509
0.400117	199.636	2.7287	2.7287
0.400698	199.926	2.6843	2.6843
0.401282	200.217	2.691	2.691
0.401865	200.508	2.68	2.68
0.402446	200.798	2.7411	2.7411
0.403029	201.089	2.7145	2.7145
0.40361	201.379	2.6481	2.6481
0.404194	201.67	2.6673	2.6673
0.404777	201.961	2.736	2.736
0.405358	202.251	2.7597	2.7597
0.405941	202.542	2.7054	2.7054
0.406523	202.832	2.7797	2.7797
0.407106	203.123	2.7488	2.7488
0.407687	203.413	2.7021	2.7021
0.40827	203.704	2.7405	2.7405
0.408853	203.995	2.8032	2.8032
0.409435	204.285	2.791	2.791
0.410018	204.576	2.8156	2.8156
0.410599	204.866	2.7876	2.7876
0.411182	205.157	2.8313	2.8313
0.411766	205.448	2.7553	2.7553
0.412347	205.738	2.8268	2.8268
0.41293	206.029	2.8648	2.8648
0.413511	206.319	2.8074	2.8074
0.414095	206.61	2.776	2.776
0.414678	206.901	2.7058	2.7058
0.415259	207.191	2.7868	2.7868
0.415842	207.482	2.7775	2.7775
0.416423	207.772	2.7683	2.7683
0.417007	208.063	2.8249	2.8249
0.41759	208.354	2.8612	2.8612
0.418171	208.644	2.909	2.909
0.418754	208.935	2.88	2.88
0.419336	209.225	2.8532	2.8532
0.419919	209.516	2.8356	2.8356
0.4205	209.806	2.8422	2.8422
0.421083	210.097	2.8429	2.8429
0.421667	210.388	2.8218	2.8218
0.422248	210.678	2.8567	2.8567
0.422831	210.969	2.8785	2.8785
0.423412	211.259	2.8957	2.8957
0.423995	211.55	2.9078	2.9078
0.424579	211.841	2.9172	2.9172
0.42516	212.131	2.9082	2.9082
0.425743	212.422	2.8951	2.8951
0.426324	212.712	2.8875	2.8875
0.426908	213.003	2.8957	2.8957
0.427491	213.294	2.9634	2.9634
0.428072	213.584	2.9348	2.9348
0.428655	213.875	2.959	2.959
0.429237	214.165	2.9988	2.9988
0.42982	214.456	2.933	2.933
0.430403	214.747	3.0039	3.0039
0.430984	215.037	2.9032	2.9032
0.431567	215.328	2.9781	2.9781
0.432149	215.618	2.9496	2.9496
0.432732	215.909	2.9148	2.9148
0.433313	216.199	2.9183	2.9183
0.433896	216.49	2.9069	2.9069
0.43448	216.781	2.9863	2.9863
0.435061	217.071	2.9313	2.9313
0.435644	217.362	2.9845	2.9845
0.436225	217.652	2.9402	2.9402
0.436809	217.943	2.9387	2.9387
0.437392	218.234	3.0161	3.0161
0.437973	218.524	3.021	3.021
0.438556	218.815	3.0099	3.0099
0.439137	219.105	3.0633	3.0633
0.439721	219.396	3.005	3.005
0.440304	219.687	2.9579	2.9579
0.440885	219.977	3.0106	3.0106
0.441468	220.268	3.0171	3.0171
0.44205	220.558	3.01	3.01
0.442633	220.849	3.0885	3.0885
0.443214	221.139	3.071	3.071
0.443797	221.43	3.1235	3.1235
0.444381	221.721	3.0681	3.0681
0.444962	222.011	3.071	3.071
0.445545	222.302	3.0484	3.0484
0.446126	222.592	3.0882	3.0882
0.446709	222.883	3.0962	3.0962
0.447293	223.174	3.0839	3.0839
0.447874	223.464	3.1126	3.1126
0.448457	223.755	3.0343	3.0343
0.449038	224.045	3.0532	3.0532
0.449622	224.336	3.0473	3.0473
0.450205	224.627	3.0529	3.0529
0.450786	224.917	3.0041	3.0041
0.451369	225.208	3.0248	3.0248
0.451951	225.498	2.9239	2.9239
0.452534	225.789	2.9702	2.9702
0.453117	226.08	2.9666	2.9666
0.453698	226.37	3.0037	3.0037
0.454281	226.661	3.0159	3.0159
0.454863	226.951	3.0083	3.0083
0.455446	227.242	2.9414	2.9414
0.456029	227.533	3.0009	3.0009
0.45661	227.823	3.0614	3.0614
0.457194	228.114	3.0241	3.0241
0.457775	228.404	2.9628	2.9628
0.458358	228.695	3.0279	3.0279
0.458939	228.985	2.9924	2.9924
0.459523	229.276	2.9667	2.9667
0.460106	229.567	2.937	2.937
0.460687	229.857	2.9499	2.9499
0.46127	230.148	2.92	2.92
0.461851	230.438	2.9771	2.9771
0.462435	230.729	2.8869	2.8869
0.463018	231.02	2.9116	2.9116
0.463599	231.31	2.9508	2.9508
0.464182	231.601	2.9912	2.9912
0.464764	231.891	3.0376	3.0376
0.465347	232.182	2.9331	2.9331
0.46593	232.473	3.0442	3.0442
0.466511	232.763	3.0672	3.0672
0.467095	233.054	3.0042	3.0042
0.467676	233.344	3.1438	3.1438
0.468259	233.635	3.0259	3.0259
0.46884	233.925	3.0564	3.0564
0.469423	234.216	3.0883	3.0883
0.470007	234.507	3.0901	3.0901
0.470588	234.797	3.1771	3.1771
0.471171	235.088	3.1502	3.1502
0.471752	235.378	3.1389	3.1389
0.472336	235.669	3.0598	3.0598
0.472919	235.96	3.0452	3.0452
0.4735	236.25	3.0101	3.0101
0.474083	236.541	3.0925	3.0925
0.474664	236.831	3.1357	3.1357
0.475248	237.122	3.084	3.084
0.475831	237.413	3.1102	3.1102
0.476412	237.703	3.1119	3.1119
0.476995	237.994	3.0369	3.0369
0.477577	238.284	3.0346	3.0346
0.47816	238.575	3.094	3.094
0.478743	238.866	3.1087	3.1087
0.479324	239.156	3.0462	3.0462
0.479908	239.447	3.1063	3.1063
0.480489	239.737	3.0712	3.0712
0.481072	240.028	3.1051	3.1051
0.481653	240.318	3.1672	3.1672
0.482236	240.609	3.0963	3.0963
0.48282	240.9	3.1136	3.1136
0.483401	241.19	3.0443	3.0443
0.483984	241.481	3.0274	3.0274
0.484565	241.771	2.9754	2.9754
0.485149	242.062	2.9347	2.9347
0.485732	242.353	3.0148	3.0148
0.486313	242.643	3.0234	3.0234
0.486896	242.934	2.9305	2.9305
0.487478	243.224	2.9602	2.9602
0.488061	243.515	3.023	3.023
0.488644	243.806	2.9683	2.9683
0.489225	244.096	3.0036	3.0036
0.489808	244.387	3.0237	3.0237
0.49039	244.677	2.953	2.953
0.490973	244.968	3.0685	3.0685
0.491556	245.259	3.1045	3.1045
0.492137	245.549	3.0807	3.0807
0.492721	245.84	3.0605	3.0605
0.493302	246.13	2.9999	2.9999
0.493885	246.421	3.0242	3.0242
0.494466	246.711	3.0714	3.0714
0.49505	247.002	3.1033	3.1033
0.495633	247.293	3.0507	3.0507
0.496214	247.583	3.0721	3.0721
0.496797	247.874	3.0543	3.0543
0.497378	248.164	3.0837	3.0837
0.497962	248.455	3.0341	3.0341
0.498545	248.746	3.0556	3.0556
0.499126	249.036	3.086	3.086
0.499709	249.327	3.1095	3.1095
0.500291	249.617	3.0425	3.0425
0.500874	249.908	3.0727	3.0727
0.501457	250.199	3.0784	3.0784
0.502038	250.489	3.0146	3.0146
0.502622	250.78	3.0117	3.0117
0.503203	251.07	3.0514	3.0514
0.503786	251.361	3.0565	3.0565
0.504369	251.652	3.004	3.004
0.50495	251.942	3.0728	3.0728
0.505534	252.233	3.0026	3.0026
0.506115	252.523	3.0295	3.0295
0.506698	252.814	2.9646	2.9646
0.507279	253.104	3.0094	3.0094
0.507863	253.395	2.986	2.986
0.508446	253.686	3.011	3.011
0.509027	253.976	2.9364	2.9364
0.50961	254.267	2.8878	2.8878
0.510192	254.557	2.9454	2.9454
0.510775	254.848	2.9827	2.9827
0.511358	255.139	2.9287	2.9287
0.511939	255.429	2.9309	2.9309
0.512522	255.72	2.9595	2.9595
0.513104	256.01	2.9007	2.9007
0.513687	256.301	2.9089	2.9089
0.51427	256.592	2.9133	2.9133
0.514851	256.882	2.8833	2.8833
0.515435	257.173	2.9128	2.9128
0.516016	257.463	2.8995	2.8995
0.516599	257.754	2.908	2.908
0.517182	258.045	2.9183	2.9183
0.517764	258.335	2.9005	2.9005
0.518347	258.626	2.8708	2.8708
0.518928	258.916	2.8954	2.8954
0.519511	259.207	2.8788	2.8788
0.520092	259.497	2.9273	2.9273
0.520676	259.788	2.9396	2.9396
0.521259	260.079	2.9459	2.9459
0.52184	260.369	2.9771	2.9771
0.522423	260.66	2.9424	2.9424
0.523005	260.95	2.9422	2.9422
0.523588	261.241	2.9816	2.9816
0.524171	261.532	3.0625	3.0625
0.524752	261.822	3.086	3.086
0.525336	262.113	3.0305	3.0305
0.525917	262.403	3.0606	3.0606
0.5265	262.694	3.0455	3.0455
0.527083	262.985	3.0079	3.0079
0.527664	263.275	3.0655	3.0655
0.528248	263.566	3.1542	3.1542
0.528829	263.856	3.1402	3.1402
0.529412	264.147	3.2157	3.2157
0.529995	264.438	3.1557	3.1557
0.530577	264.728	3.1462	3.1462
0.53116	265.019	3.2151	3.2151
0.531741	265.309	3.1886	3.1886
0.532324	265.6	3.2019	3.2019
0.532905	265.89	3.2407	3.2407
0.533489	266.181	3.2553	3.2553
0.534072	266.472	3.1665	3.1665
0.534653	266.762	3.1477	3.1477
0.535236	267.053	3.1476	3.1476
0.535818	267.343	3.1179	3.1179
0.536401	267.634	3.1011	3.1011
0.536984	267.925	3.1325	3.1325
0.537565	268.215	3.1262	3.1262
0.538149	268.506	3.1212	3.1212
0.53873	268.796	3.1684	3.1684
0.539313	269.087	3.1475	3.1475
0.539896	269.378	3.1827	3.1827
0.540477	269.668	3.2155	3.2155
0.541061	269.959	3.2741	3.2741
0.541642	270.249	3.3163	3.3163
0.542225	270.54	3.3541	3.3541
0.542808	270.831	3.3617	3.3617
0.54339	271.121	3.4356	3.4356
0.543973	271.412	3.4617	3.4617
0.544554	271.702	3.5934	3.5934
0.545137	271.993	3.6879	3.6879
0.545719	272.283	3.7222	3.7222
0.546302	272.574	3.7562	3.7562
0.546885	272.865	3.7571	3.7571
0.547466	273.155	3.7252	3.7252
0.548049	273.446	3.8429	3.8429
0.548631	273.736	3.8794	3.8794
0.549214	274.027	3.8944	3.8944
0.549797	274.318	3.9027	3.9027
0.550378	274.608	3.8933	3.8933
0.550962	274.899	3.9121	3.9121
0.551543	275.189	3.8694	3.8694
0.552126	275.48	3.9432	3.9432
0.552709	275.771	3.9148	3.9148
0.553291	276.061	3.8073	3.8073
0.553874	276.352	3.7824	3.7824
0.554455	276.642	3.8275	3.8275
0.555038	276.933	3.7805	3.7805
0.555621	277.224	3.7174	3.7174
0.556203	277.514	3.7195	3.7195
0.556786	277.805	3.7078	3.7078
0.557367	278.095	3.6554	3.6554
0.55795	278.386	3.5744	3.5744
0.558532	278.676	3.6893	3.6893
0.559115	278.967	3.6548	3.6548
0.559698	279.258	3.5703	3.5703
0.560279	279.548	3.5804	3.5804
0.560863	279.839	3.551	3.551
0.561444	280.129	3.6158	3.6158
0.562027	280.42	3.6666	3.6666
0.56261	280.711	3.6959	3.6959
0.563191	281.001	3.6069	3.6069
0.563775	281.292	3.6054	3.6054
0.564356	281.582	3.5962	3.5962
0.564939	281.873	3.5511	3.5511
0.565522	282.164	3.5495	3.5495
0.566104	282.454	3.628	3.628
0.566687	282.745	3.6537	3.6537
0.567268	283.035	3.6041	3.6041
0.567851	283.326	3.681	3.681
0.568433	283.616	3.6875	3.6875
0.569016	283.907	3.7007	3.7007
0.569599	284.198	3.7431	3.7431
0.57018	284.488	3.6049	3.6049
0.570763	284.779	3.6422	3.6422
0.571345	285.069	3.6675	3.6675
0.571928	285.36	3.6232	3.6232
0.572511	285.651	3.6053	3.6053
0.573092	285.941	3.6066	3.6066
0.573676	286.232	3.6209	3.6209
0.574257	286.522	3.5682	3.5682
0.57484	286.813	3.6257	3.6257
0.575423	287.104	3.6088	3.6088
0.576005	287.394	3.5815	3.5815
0.576588	287.685	3.5496	3.5496
0.577169	287.975	3.5021	3.5021
0.577752	288.266	3.4914	3.4914
0.578335	288.557	3.455	3.455
0.578917	288.847	3.4289	3.4289
0.5795	289.138	3.5988	3.5988
0.580081	289.428	3.49	3.49
0.580664	289.719	3.5346	3.5346
0.581246	290.009	3.4947	3.4947
0.581829	290.3	3.58	3.58
0.582412	290.591	3.6493	3.6493
0.582993	290.881	3.6152	3.6152
0.583577	291.172	3.688	3.688
0.584158	291.462	3.5625	3.5625
0.584741	291.753	3.6365	3.6365
0.585324	292.044	3.581	3.581
0.585905	292.334	3.6006	3.6006
0.586489	292.625	3.5261	3.5261
0.58707	292.915	3.5785	3.5785
0.587653	293.206	3.529	3.529
0.588236	293.497	3.509	3.509
0.588818	293.787	3.4687	3.4687
0.589401	294.078	3.4956	3.4956
0.589982	294.368	3.4368	3.4368
0.590565	294.659	3.41	3.41
0.591149	294.95	3.3298	3.3298
0.59173	295.24	3.3104	3.3104
0.592313	295.531	3.3689	3.3689
0.592894	295.821	3.4398	3.4398
0.593477	296.112	3.4146	3.4146
0.594059	296.402	3.3967	3.3967
0.594642	296.693	3.3496	3.3496
0.595225	296.984	3.3604	3.3604
0.595806	297.274	3.3662	3.3662
0.59639	297.565	3.4251	3.4251
0.596971	297.855	3.4231	3.4231
0.597554	298.146	3.4152	3.4152
0.598137	298.437	3.4298	3.4298
0.598718	298.727	3.4113	3.4113
0.599302	299.018	3.3918	3.3918
0.599883	299.308	3.5023	3.5023
0.600466	299.599	3.5323	3.5323
0.601049	299.89	3.4638	3.4638
0.601631	300.18	3.4828	3.4828
0.602214	300.471	3.4241	3.4241
0.602795	300.761	3.3939	3.3939
0.603378	301.052	3.4373	3.4373
0.603962	301.343	3.4635	3.4635
0.604543	301.633	3.4838	3.4838
0.605126	301.924	3.4542	3.4542
0.605707	302.214	3.5471	3.5471
0.60629	302.505	3.5726	3.5726
0.606872	302.795	3.5557	3.5557
0.607455	303.086	3.6204	3.6204
0.608038	303.377	3.6373	3.6373
0.608619	303.667	3.6404	3.6404
0.609203	303.958	3.6768	3.6768
0.609784	304.248	3.76	3.76
0.610367	304.539	3.7421	3.7421
0.61095	304.83	3.7358	3.7358
0.611532	305.12	3.727	3.727
0.612115	305.411	3.711	3.711
0.612696	305.701	3.7092	3.7092
0.613279	305.992	3.7215	3.7215
0.613862	306.283	3.6405	3.6405
0.614444	306.573	3.6834	3.6834
0.615027	306.864	3.728	3.728
0.615608	307.154	3.7249	3.7249
0.616191	307.445	3.7888	3.7888
0.616775	307.736	3.7607	3.7607
0.617356	308.026	3.8048	3.8048
0.617939	308.317	3.8075	3.8075
0.61852	308.607	3.8171	3.8171
0.619104	308.898	3.8458	3.8458
0.619685	309.188	3.8309	3.8309
0.620268	309.479	3.7447	3.7447
0.620851	309.77	3.7305	3.7305
0.621432	310.06	3.6871	3.6871
0.622016	310.351	3.6933	3.6933
0.622597	310.641	3.7411	3.7411
0.62318	310.932	3.7522	3.7522
0.623763	311.223	3.7491	3.7491
0.624345	311.513	3.6783	3.6783
0.624928	311.804	3.6413	3.6413
0.625509	312.094	3.7184	3.7184
0.626092	312.385	3.6665	3.6665
0.626676	312.676	3.5799	3.5799
0.627257	312.966	3.6685	3.6685
0.62784	313.257	3.6237	3.6237
0.628421	313.547	3.6398	3.6398
0.629004	313.838	3.5846	3.5846
0.629588	314.129	3.5509	3.5509
0.630169	314.419	3.5173	3.5173
0.630752	314.71	3.5232	3.5232
0.631333	315	3.5397	3.5397
0.631917	315.291	3.515	3.515
0.632498	315.581	3.5573	3.5573
0.633081	315.872	3.5834	3.5834
0.633664	316.163	3.6272	3.6272
0.634246	316.453	3.5783	3.5783
0.634829	316.744	3.5543	3.5543
0.63541	317.034	3.6031	3.6031
0.635993	317.325	3.6432	3.6432
0.636576	317.616	3.6538	3.6538
0.637158	317.906	3.6971	3.6971
0.637741	318.197	3.6803	3.6803
0.638322	318.487	3.6657	3.6657
0.638905	318.778	3.7622	3.7622
0.639489	319.069	3.7402	3.7402
0.64007	319.359	3.7971	3.7971
0.640653	319.65	3.7887	3.7887
0.641234	319.94	3.7869	3.7869
0.641818	320.231	3.8325	3.8325
0.642401	320.522	3.7521	3.7521
0.642982	320.812	3.7244	3.7244
0.643565	321.103	3.7235	3.7235
0.644146	321.393	3.7163	3.7163
0.64473	321.684	3.6694	3.6694
0.645311	321.974	3.6265	3.6265
0.645894	322.265	3.5636	3.5636
0.646477	322.556	3.5379	3.5379
0.647059	322.846	3.5395	3.5395
0.647642	323.137	3.5071	3.5071
0.648223	323.427	3.5607	3.5607
0.648806	323.718	3.6211	3.6211
0.64939	324.009	3.6973	3.6973
0.649971	324.299	3.7262	3.7262
0.650554	324.59	3.7205	3.7205
0.651135	324.88	3.7356	3.7356
0.651718	325.171	3.7381	3.7381
0.652302	325.462	3.7969	3.7969
0.652883	325.752	3.8515	3.8515
0.653466	326.043	3.8981	3.8981
0.654047	326.333	3.9897	3.9897
0.654631	326.624	3.9996	3.9996
0.655212	326.914	4.032	4.032
0.655795	327.205	4.0783	4.0783
0.656378	327.496	4.1851	4.1851
0.656959	327.786	4.1388	4.1388
0.657543	328.077	4.1595	4.1595
0.658124	328.367	4.0333	4.0333
0.658707	328.658	4.014	4.014
0.65929	328.949	3.9847	3.9847
0.659872	329.239	4.0043	4.0043
0.660455	329.53	3.9152	3.9152
0.661036	329.82	3.9942	3.9942
0.661619	330.111	3.933	3.933
0.662203	330.402	3.9102	3.9102
0.662784	330.692	3.9897	3.9897
0.663367	330.983	4.0005	4.0005
0.663948	331.273	4.002	4.002
0.664531	331.564	3.935	3.935
0.665115	331.855	3.8769	3.8769
0.665696	332.145	3.7846	3.7846
0.666279	332.436	3.8198	3.8198
0.66686	332.726	3.846	3.846
0.667444	333.017	3.8291	3.8291
0.668025	333.307	3.7878	3.7878
0.668608	333.598	3.867	3.867
0.669191	333.889	3.8817	3.8817
0.669773	334.179	3.959	3.959
0.670356	334.47	3.9659	3.9659
0.670937	334.76	3.9625	3.9625
0.67152	335.051	3.923	3.923
0.672103	335.342	3.9898	3.9898
0.672685	335.632	3.9707	3.9707
0.673268	335.923	3.9722	3.9722
0.673849	336.213	4.0224	4.0224
0.674432	336.504	4.0954	4.0954
0.675016	336.795	4.0035	4.0035
0.675597	337.085	3.7699	3.7699
0.67618	337.376	3.7435	3.7435
0.676761	337.666	3.6652	3.6652
0.677345	337.957	3.6586	3.6586
0.677928	338.248	3.6649	3.6649
0.678509	338.538	3.6196	3.6196
0.679092	338.829	3.5906	3.5906
0.679673	339.119	3.6361	3.6361
0.680257	339.41	3.6707	3.6707
0.68084	339.701	3.6606	3.6606
0.681421	339.991	3.7759	3.7759
0.682004	340.282	3.7758	3.7758
0.682586	340.572	3.8096	3.8096
0.683169	340.863	3.6798	3.6798
0.68375	341.153	3.8239	3.8239
0.684333	341.444	3.8188	3.8188
0.684917	341.735	3.8644	3.8644
0.685498	342.025	3.7931	3.7931
0.686081	342.316	3.8214	3.8214
0.686662	342.606	3.8218	3.8218
0.687245	342.897	3.7791	3.7791
0.687829	343.188	3.8025	3.8025
0.68841	343.478	3.6845	3.6845
0.688993	343.769	3.7836	3.7836
0.689574	344.059	3.793	3.793
0.690158	344.35	3.742	3.742
0.690741	344.641	3.7808	3.7808
0.691322	344.931	3.758	3.758
0.691905	345.222	3.8105	3.8105
0.692487	345.512	3.7849	3.7849
0.69307	345.803	3.847	3.847
0.693651	346.093	3.8526	3.8526
0.694234	346.384	3.8917	3.8917
0.694817	346.675	3.8534	3.8534
0.695399	346.965	3.7717	3.7717
0.695982	347.256	3.8412	3.8412
0.696563	347.546	4.013	4.013
0.697146	347.837	3.9168	3.9168
0.69773	348.128	3.9386	3.9386
0.698311	348.418	3.9293	3.9293
0.698894	348.709	3.9486	3.9486
0.699475	348.999	3.9394	3.9394
0.700059	349.29	3.9706	3.9706
0.700642	349.581	4.1232	4.1232
0.701223	349.871	4.1141	4.1141
0.701806	350.162	4.0687	4.0687
0.702387	350.452	4.1201	4.1201
0.702971	350.743	4.1803	4.1803
0.703554	351.034	4.1517	4.1517
0.704135	351.324	4.2261	4.2261
0.704718	351.615	4.2468	4.2468
0.7053	351.905	4.2334	4.2334
0.705883	352.196	4.2586	4.2586
0.706464	352.486	4.2356	4.2356
0.707047	352.777	4.3091	4.3091
0.707631	353.068	4.4863	4.4863
0.708212	353.358	4.4966	4.4966
0.708795	353.649	4.5299	4.5299
0.709376	353.939	4.5524	4.5524
0.709959	354.23	4.5485	4.5485
0.710543	354.521	4.5564	4.5564
0.711124	354.811	4.5154	4.5154
0.711707	355.102	4.6439	4.6439
0.712288	355.392	4.6462	4.6462
0.712872	355.683	4.5606	4.5606
0.713455	355.974	4.5158	4.5158
0.714036	356.264	4.5308	4.5308
0.714619	356.555	4.4693	4.4693
0.715201	356.845	4.6193	4.6193
0.715784	357.136	4.6785	4.6785
0.716367	357.427	4.7174	4.7174
0.716948	357.717	4.7614	4.7614
0.717531	358.008	4.8026	4.8026
0.718113	358.298	4.8617	4.8617
0.718696	358.589	4.9437	4.9437
0.719277	358.879	5.0227	5.0227
0.71986	359.17	4.9694	4.9694
0.720444	359.461	5.0313	5.0313
0.721025	359.751	4.971	4.971
0.721608	360.042	5.0934	5.0934
0.722189	360.332	5.164	5.164
0.722772	360.623	5.2623	5.2623
0.723356	360.914	5.2686	5.2686
0.723937	361.204	5.2546	5.2546
0.72452	361.495	5.3067	5.3067
0.725101	361.785	5.5158	5.5158
0.725685	362.076	5.6377	5.6377
0.726268	362.367	5.657	5.657
0.726849	362.657	5.7797	5.7797
0.727432	362.948	6.0324	6.0324
0.728014	363.238	6.1988	6.1988
0.728597	363.529	6.2287	6.2287
0.72918	363.82	6.3543	6.3543
0.729761	364.11	6.4994	6.4994
0.730344	364.401	6.6537	6.6537
0.730926	364.691	6.7831	6.7831
0.731509	364.982	6.9998	6.9998
0.73209	365.272	7.1007	7.1007
0.732673	365.563	7.2561	7.2561
0.733257	365.854	7.4718	7.4718
0.733838	366.144	7.5752	7.5752
0.734421	366.435	7.6549	7.6549
0.735002	366.725	7.9052	7.9052
0.735586	367.016	7.8567	7.8567
0.736169	367.307	8.1094	8.1094
0.73675	367.597	8.2379	8.2379
0.737333	367.888	8.3277	8.3277
0.737914	368.178	8.3864	8.3864
0.738498	368.469	8.6712	8.6712
0.739081	368.76	8.5719	8.5719
0.739662	369.05	8.7472	8.7472
0.740245	369.341	8.887	8.887
0.740827	369.631	8.9444	8.9444
0.74141	369.922	8.8916	8.8916
0.741993	370.213	8.982	8.982
0.742574	370.503	8.9413	8.9413
0.743158	370.794	9.0903	9.0903
0.743739	371.084	9.0287	9.0287
0.744322	371.375	8.914	8.914
0.744903	371.665	8.9141	8.9141
0.745486	371.956	8.9004	8.9004
0.74607	372.247	8.8626	8.8626
0.746651	372.537	8.828	8.828
0.747234	372.828	8.9521	8.9521
0.747815	373.118	8.8471	8.8471
0.748399	373.409	8.8908	8.8908
0.748982	373.7	8.8112	8.8112
0.749563	373.99	8.6643	8.6643
0.750146	374.281	8.7664	8.7664
0.750728	374.571	8.6515	8.6515
0.751311	374.862	8.5305	8.5305
0.751894	375.153	8.4929	8.4929
0.752475	375.443	8.5794	8.5794
0.753058	375.734	8.5996	8.5996
0.75364	376.024	8.546	8.546
0.754223	376.315	8.7297	8.7297
0.754804	376.605	8.7468	8.7468
0.755387	376.896	9.0098	9.0098
0.755971	377.187	9.0263	9.0263
0.756552	377.477	8.9665	8.9665
0.757135	377.768	9.0168	9.0168
0.757716	378.058	9.0933	9.0933
0.7583	378.349	9.2197	9.2197
0.758883	378.64	9.2778	9.2778
0.759464	378.93	9.4527	9.4527
0.760047	379.221	9.5628	9.5628
0.760628	379.511	9.5929	9.5929
0.761212	379.802	9.692	9.692
0.761795	380.093	9.8613	9.8613
0.762376	380.383	9.9523	9.9523
0.762959	380.674	9.8943	9.8943
0.763541	380.964	10.2514	10.2514
0.764124	381.255	10.191	10.191
0.764707	381.546	10.1724	10.1724
0.765288	381.836	10.3921	10.3921
0.765872	382.127	10.4563	10.4563
0.766453	382.417	10.6283	10.6283
0.767036	382.708	10.837	10.837
0.767619	382.999	11.0363	11.0363
0.7682	383.289	11.1822	11.1822
0.768784	383.58	11.504	11.504
0.769365	383.87	11.7051	11.7051
0.769948	384.161	11.9056	11.9056
0.770529	384.451	12.1806	12.1806
0.771113	384.742	12.4048	12.4048
0.771696	385.033	12.8136	12.8136
0.772277	385.323	13.0563	13.0563
0.77286	385.614	13.4258	13.4258
0.773442	385.904	13.6405	13.6405
0.774025	386.195	13.8875	13.8875
0.774608	386.486	13.9886	13.9886
0.775189	386.776	14.4312	14.4312
0.775772	387.067	14.765	14.765
0.776354	387.357	15.0452	15.0452
0.776937	387.648	15.3487	15.3487
0.77752	387.939	15.615	15.615
0.778101	388.229	15.9027	15.9027
0.778685	388.52	16.1439	16.1439
0.779266	388.81	16.4292	16.4292
0.779849	389.101	16.8871	16.8871
0.780432	389.392	17.0654	17.0654
0.781014	389.682	17.3854	17.3854
0.781597	389.973	17.7612	17.7612
0.782178	390.263	18.1306	18.1306
0.782761	390.554	18.1546	18.1546
0.783342	390.844	18.2738	18.2738
0.783926	391.135	18.5112	18.5112
0.784509	391.426	18.7223	18.7223
0.78509	391.716	18.833	18.833
0.785673	392.007	18.8221	18.8221
0.786255	392.297	19.0528	19.0528
0.786838	392.588	19.1861	19.1861
0.787421	392.879	19.3811	19.3811
0.788002	393.169	19.2438	19.2438
0.788585	393.46	19.1605	19.1605
0.789167	393.75	19.2119	19.2119
0.78975	394.041	19.117	19.117
0.790333	394.332	19.1172	19.1172
0.790914	394.622	18.7205	18.7205
0.791498	394.913	18.4585	18.4585
0.792079	395.203	18.0804	18.0804
0.792662	395.494	17.8198	17.8198
0.793243	395.784	17.8557	17.8557
0.793827	396.075	17.682	17.682
0.79441	396.366	17.2647	17.2647
0.794991	396.656	16.9458	16.9458
0.795574	396.947	16.8803	16.8803
0.796155	397.237	17.0923	17.0923
0.796739	397.528	16.816	16.816
0.797322	397.819	16.6559	16.6559
0.797903	398.109	16.449	16.449
0.798486	398.4	16.2546	16.2546
0.799068	398.69	16.308	16.308
0.799651	398.981	16.2144	16.2144
0.800234	399.272	16.2531	16.2531
0.800815	399.562	15.8943	15.8943
0.801399	399.853	15.978	15.978
0.80198	400.143	16.1445	16.1445
0.802563	400.434	16.0097	16.0097
0.803146	400.725	15.9982	15.9982
0.803727	401.015	15.6168	15.6168
0.804311	401.306	15.6142	15.6142
0.804892	401.596	15.9761	15.9761
0.805475	401.887	15.8227	15.8227
0.806056	402.177	15.7162	15.7162
0.80664	402.468	15.7856	15.7856
0.807223	402.759	15.654	15.654
0.807804	403.049	15.4358	15.4358
0.808387	403.34	15.6774	15.6774
0.808969	403.63	15.4751	15.4751
0.809552	403.921	15.5271	15.5271
0.810135	404.212	15.3589	15.3589
0.810716	404.502	15.5156	15.5156
0.811299	404.793	15.5059	15.5059
0.811881	405.083	15.417	15.417
0.812464	405.374	15.2956	15.2956
0.813047	405.665	15.346	15.346
0.813628	405.955	15.4921	15.4921
0.814212	406.246	15.4269	15.4269
0.814793	406.536	15.5218	15.5218
0.815376	406.827	15.6125	15.6125
0.815959	407.118	15.7062	15.7062
0.816541	407.408	15.8261	15.8261
0.817124	407.699	15.6639	15.6639
0.817705	407.989	15.7772	15.7772
0.818288	408.28	15.8144	15.8144
0.818869	408.57	15.6898	15.6898
0.819453	408.861	16.0147	16.0147
0.820036	409.152	15.9569	15.9569
0.820617	409.442	16.183	16.183
0.8212	409.733	16.2423	16.2423
0.821782	410.023	16.3602	16.3602
0.822365	410.314	16.3944	16.3944
0.822948	410.605	16.3498	16.3498
0.823529	410.895	16.5986	16.5986
0.824113	411.186	16.4478	16.4478
0.824694	411.476	16.6915	16.6915
0.825277	411.767	16.6254	16.6254
0.82586	412.058	16.6746	16.6746
0.826441	412.348	16.6987	16.6987
0.827025	412.639	16.806	16.806
0.827606	412.929	16.5009	16.5009
0.828189	413.22	16.474	16.474
0.828772	413.511	16.5907	16.5907
0.829354	413.801	16.3776	16.3776
0.829937	414.092	16.2047	16.2047
0.830518	414.382	15.977	15.977
0.831101	414.673	16.0852	16.0852
0.831683	414.963	15.98	15.98
0.832266	415.254	15.9579	15.9579
0.832849	415.545	15.7965	15.7965
0.83343	415.835	16.0024	16.0024
0.834013	416.126	15.8388	15.8388
0.834595	416.416	15.7305	15.7305
0.835178	416.707	15.6902	15.6902
0.835761	416.998	15.618	15.618
0.836342	417.288	15.4817	15.4817
0.836926	417.579	15.4971	15.4971
0.837507	417.869	15.3133	15.3133
0.83809	418.16	15.2678	15.2678
0.838673	418.451	15.1677	15.1677
0.839255	418.741	14.9939	14.9939
0.839838	419.032	14.4904	14.4904
0.840419	419.322	14.1988	14.1988
0.841002	419.613	13.7307	13.7307
0.841585	419.904	13.6176	13.6176
0.842167	420.194	13.3431	13.3431
0.84275	420.485	12.9712	12.9712
0.843331	420.775	12.6584	12.6584
0.843914	421.066	12.6064	12.6064
0.844496	421.356	12.2715	12.2715
0.845079	421.647	12.0298	12.0298
0.845662	421.938	11.7671	11.7671
0.846243	422.228	11.7049	11.7049
0.846826	422.519	11.5631	11.5631
0.847408	422.809	11.3146	11.3146
0.847991	423.1	11.187	11.187
0.848574	423.391	11.0639	11.0639
0.849155	423.681	10.8613	10.8613
0.849739	423.972	10.7526	10.7526
0.85032	424.262	10.5894	10.5894
0.850903	424.553	10.4419	10.4419
0.851486	424.844	10.3142	10.3142
0.852068	425.134	10.3044	10.3044
0.852651	425.425	10.1975	10.1975
0.853232	425.715	10.2065	10.2065
0.853815	426.006	10.3375	10.3375
0.854398	426.297	10.236	10.236
0.85498	426.587	10.0283	10.0283
0.855563	426.878	10.0835	10.0835
0.856144	427.168	10.011	10.011
0.856727	427.459	10.0835	10.0835
0.857309	427.749	10.0068	10.0068
0.857892	428.04	10.0348	10.0348
0.858475	428.331	9.9599	9.9599
0.859056	428.621	9.6354	9.6354
0.85964	428.912	9.4577	9.4577
0.860221	429.202	9.4315	9.4315
0.860804	429.493	9.2124	9.2124
0.861387	429.784	9.1736	9.1736
0.861968	430.074	9.1029	9.1029
0.862552	430.365	9.0024	9.0024
0.863133	430.655	8.8004	8.8004
0.863716	430.946	8.6754	8.6754
0.864299	431.237	8.6136	8.6136
0.864881	431.527	8.5193	8.5193
0.865464	431.818	8.3349	8.3349
0.866045	432.108	8.138	8.138
0.866628	432.399	8.0619	8.0619
0.867212	432.69	8.1741	8.1741
0.867793	432.98	8.0738	8.0738
0.868376	433.271	7.9166	7.9166
0.868957	433.561	8.0246	8.0246
0.86954	433.852	7.9369	7.9369
0.870122	434.142	7.7206	7.7206
0.870705	434.433	7.6186	7.6186
0.871288	434.724	7.6635	7.6635
0.871869	435.014	7.5607	7.5607
0.872453	435.305	7.5335	7.5335
0.873034	435.595	7.5496	7.5496
0.873617	435.886	7.6106	7.6106
0.8742	436.177	7.6181	7.6181
0.874782	436.467	7.6221	7.6221
0.875365	436.758	7.6743	7.6743
0.875946	437.048	7.3967	7.3967
0.876529	437.339	7.2855	7.2855
0.877112	437.63	7.2359	7.2359
0.877694	437.92	7.2878	7.2878
0.878277	438.211	7.1876	7.1876
0.878858	438.501	7.1435	7.1435
0.879441	438.792	7.1227	7.1227
0.880023	439.082	6.9985	6.9985
0.880606	439.373	6.9363	6.9363
0.881189	439.664	6.9165	6.9165
0.88177	439.954	6.8822	6.8822
0.882354	440.245	6.8946	6.8946
0.882935	440.535	6.832	6.832
0.883518	440.826	6.764	6.764
0.884101	441.117	6.6694	6.6694
0.884682	441.407	6.7152	6.7152
0.885266	441.698	6.5717	6.5717
0.885847	441.988	6.5701	6.5701
0.88643	442.279	6.3671	6.3671
0.887013	442.57	6.468	6.468
0.887595	442.86	6.3771	6.3771
0.888178	443.151	6.2434	6.2434
0.888759	443.441	6.0937	6.0937
0.889342	443.732	6.085	6.085
0.889926	444.023	6.0107	6.0107
0.890507	444.313	6.0139	6.0139
0.89109	444.604	5.9144	5.9144
0.891671	444.894	5.8002	5.8002
0.892254	445.185	5.8006	5.8006
0.892836	445.475	5.7122	5.7122
0.893419	445.766	5.6808	5.6808
0.894002	446.057	5.6479	5.6479
0.894583	446.347	5.6155	5.6155
0.895167	446.638	5.4187	5.4187
0.895748	446.928	5.3271	5.3271
0.896331	447.219	5.1225	5.1225
0.896914	447.51	5.0666	5.0666
0.897496	447.8	4.9231	4.9231
0.898079	448.091	4.8879	4.8879
0.89866	448.381	4.9033	4.9033
0.899243	448.672	4.7806	4.7806
0.899826	448.963	4.6518	4.6518
0.900408	449.253	4.6313	4.6313
0.900991	449.544	4.6474	4.6474
0.901572	449.834	4.5515	4.5515
0.902155	450.125	4.5931	4.5931
0.902739	450.416	4.6443	4.6443
0.90332	450.706	4.5472	4.5472
0.903903	450.997	4.5824	4.5824
0.904484	451.287	4.514	4.514
0.905068	451.578	4.5429	4.5429
0.905649	451.868	4.5847	4.5847
0.906232	452.159	4.553	4.553
0.906815	452.45	4.4586	4.4586
0.907396	452.74	4.591	4.591
0.90798	453.031	4.5445	4.5445
0.908561	453.321	4.4927	4.4927
0.909144	453.612	4.5235	4.5235
0.909727	453.903	4.514	4.514
0.910309	454.193	4.499	4.499
0.910892	454.484	4.5685	4.5685
0.911473	454.774	4.4263	4.4263
0.912056	455.065	4.4557	4.4557
0.912639	455.356	4.3973	4.3973
0.913221	455.646	4.3562	4.3562
0.913804	455.937	4.2831	4.2831
0.914385	456.227	4.1712	4.1712
0.914968	456.518	4.0798	4.0798
0.915552	456.809	4.115	4.115
0.916133	457.099	4.0232	4.0232
0.916716	457.39	3.8707	3.8707
0.917297	457.68	3.8648	3.8648
0.917881	457.971	3.8274	3.8274
0.918462	458.261	3.7848	3.7848
0.919045	458.552	3.7029	3.7029
0.919628	458.843	3.7719	3.7719
0.920209	459.133	3.6674	3.6674
0.920793	459.424	3.5892	3.5892
0.921374	459.714	3.5754	3.5754
0.921957	460.005	3.5624	3.5624
0.92254	460.296	3.4907	3.4907
0.923122	460.586	3.5012	3.5012
0.923705	460.877	3.4023	3.4023
0.924286	461.167	3.3695	3.3695
0.924869	461.458	3.2757	3.2757
0.925453	461.749	3.1769	3.1769
0.926034	462.039	3.094	3.094
0.926617	462.33	3.1361	3.1361
0.927198	462.62	3.1702	3.1702
0.927781	462.911	3.1549	3.1549
0.928365	463.202	3.2029	3.2029
0.928946	463.492	3.2526	3.2526
0.929529	463.783	3.2342	3.2342
0.93011	464.073	3.2188	3.2188
0.930694	464.364	3.28	3.28
0.931275	464.654	3.2401	3.2401
0.931858	464.945	3.1008	3.1008
0.932441	465.236	3.1972	3.1972
0.933023	465.526	3.1095	3.1095
0.933606	465.817	3.0544	3.0544
0.934187	466.107	3.0279	3.0279
0.93477	466.398	3.0066	3.0066
0.935353	466.689	2.9824	2.9824
0.935935	466.979	2.9137	2.9137
0.936518	467.27	2.9224	2.9224
0.937099	467.56	2.9253	2.9253
0.937682	467.851	2.9238	2.9238
0.938266	468.142	2.8738	2.8738
0.938847	468.432	2.8172	2.8172
0.93943	468.723	2.8887	2.8887
0.940011	469.013	2.9051	2.9051
0.940595	469.304	2.8824	2.8824
0.941178	469.595	2.9145	2.9145
0.941759	469.885	2.8857	2.8857
0.942342	470.176	2.8501	2.8501
0.942923	470.466	2.7124	2.7124
0.943507	470.757	2.7866	2.7866
0.944088	471.047	2.7948	2.7948
0.944671	471.338	2.7968	2.7968
0.945254	471.629	2.8029	2.8029
0.945836	471.919	2.7645	2.7645
0.946419	472.21	2.746	2.746
0.947	472.5	2.7286	2.7286
0.947583	472.791	2.6492	2.6492
0.948167	473.082	2.6088	2.6088
0.948748	473.372	2.6017	2.6017
0.949331	473.663	2.6028	2.6028
0.949912	473.953	2.5304	2.5304
0.950495	474.244	2.5383	2.5383
0.951079	474.535	2.4995	2.4995
0.95166	474.825	2.4514	2.4514
0.952243	475.116	2.4771	2.4771
0.952824	475.406	2.4296	2.4296
0.953408	475.697	2.4834	2.4834
0.953991	475.988	2.5211	2.5211
0.954572	476.278	2.4542	2.4542
0.955155	476.569	2.4373	2.4373
0.955737	476.859	2.4859	2.4859
0.95632	477.15	2.5631	2.5631
0.956901	477.44	2.5062	2.5062
0.957484	477.731	2.517	2.517
0.958067	478.022	2.5014	2.5014
0.958649	478.312	2.4477	2.4477
0.959232	478.603	2.4739	2.4739
0.959813	478.893	2.4721	2.4721
0.960396	479.184	2.466	2.466
0.96098	479.475	2.4489	2.4489
0.961561	479.765	2.4294	2.4294
0.962144	480.056	2.3591	2.3591
0.962725	480.346	2.4209	2.4209
0.963309	480.637	2.4258	2.4258
0.963892	480.928	2.3534	2.3534
0.964473	481.218	2.3659	2.3659
0.965056	481.509	2.3622	2.3622
0.965637	481.799	2.4261	2.4261
0.966221	482.09	2.4204	2.4204
0.966804	482.381	2.3859	2.3859
0.967385	482.671	2.3523	2.3523
0.967968	482.962	2.3516	2.3516
0.96855	483.252	2.3028	2.3028
0.969133	483.543	2.3475	2.3475
0.969714	483.833	2.4005	2.4005
0.970297	484.124	2.2993	2.2993
0.97088	484.415	2.4075	2.4075
0.971462	484.705	2.4127	2.4127
0.972045	484.996	2.4217	2.4217
0.972626	485.286	2.4216	2.4216
0.973209	485.577	2.4749	2.4749
0.973793	485.868	2.4319	2.4319
0.974374	486.158	2.4801	2.4801
0.974957	486.449	2.4495	2.4495
0.975538	486.739	2.4509	2.4509
0.976122	487.03	2.5514	2.5514
0.976705	487.321	2.4974	2.4974
0.977286	487.611	2.4697	2.4697
0.977869	487.902	2.4601	2.4601
0.97845	488.192	2.401	2.401
0.979034	488.483	2.4557	2.4557
0.979615	488.773	2.5407	2.5407
0.980198	489.064	2.5168	2.5168
0.980781	489.355	2.4772	2.4772
0.981363	489.645	2.3641	2.3641
0.981946	489.936	2.358	2.358
0.982527	490.226	2.3674	2.3674
0.98311	490.517	2.3518	2.3518
0.983694	490.808	2.3522	2.3522
0.984275	491.098	2.2747	2.2747
0.984858	491.389	2.2128	2.2128
0.985439	491.679	2.2434	2.2434
0.986022	491.97	2.2561	2.2561
0.986606	492.261	2.1991	2.1991
0.987187	492.551	2.2554	2.2554
0.98777	492.842	2.1953	2.1953
0.988351	493.132	2.1918	2.1918
0.988935	493.423	2.156	2.156
0.989518	493.714	2.129	2.129
0.990099	494.004	2.1677	2.1677
0.990682	494.295	2.1336	2.1336
0.991264	494.585	2.0976	2.0976
0.991847	494.876	2.1941	2.1941
0.99243	495.167	2.1021	2.1021
0.993011	495.457	2.1194	2.1194
0.993594	495.748	2.074	2.074
0.994176	496.038	2.0643	2.0643
0.994759	496.329	2.0385	2.0385
0.99534	496.619	2.0088	2.0088
0.995923	496.91	1.9693	1.9693
0.996507	497.201	1.9513	1.9513
0.997088	497.491	1.9906	1.9906
0.997671	497.782	1.9935	1.9935
0.998252	498.072	1.9364	1.9364
0.998836	498.363	1.9116	1.9116
0.999419	498.654	1.8724	1.8724
1	498.944	1.8181	1.8181

## Sheet: 3.10.19 V409A
Line width = 300
VA A1		0-33				VA A2		0-33				VA A3		0-33				VA B1		0-33				VA B2		0-33				VA B3		0-33
Normalized cortex length	Distance (µm)	GFP Fluorescence Intensity				Normalized cortex length	Distance (µm)	GFP Fluorescence Intensity				Normalized cortex length	Distance (µm)	GFP Fluorescence Intensity				Normalized cortex length	Distance (µm)	GFP Fluorescence Intensity				Normalized cortex length	Distance (µm)	GFP Fluorescence Intensity				Normalized cortex length	Distance (µm)	GFP Fluorescence Intensity
0	0	5.5443	11.6292	0.497787		0	0	12.9607	18.0917	0.498295		0	0	6.6914	24.2247	0.5915		0	0	33.338	44.3801	0.610068		0	0	18.3334	35.2833	0.50379		0	0	4.2071	10.6232	0.420594
0.000510662	0.291	5.5673	3.44955	0.147658		0.000620452	0.291	13.0556	7.82491	0.215519		0.000571255	0.291	6.6462	6.99871	0.170889		0.000418299	0.291	33.768	11.558	0.158881		0.000509364	0.291	16.6958	14.4013	0.205628		0.00050398	0.291	4.1848	4.46681	0.17685
0.00101957	0.581	5.6147	4.13142	0.176845		0.00123877	0.581	13.321	4.8598	0.133852		0.00114055	0.581	6.6858	4.05614	0.0990394		0.000835161	0.581	34.158	8.50215	0.116874		0.00101698	0.581	15.6998	11.7234	0.167392		0.00100623	0.581	4.2325	4.77872	0.189199
0.00153023	0.872	5.7384	4.15161	0.17771		0.00185922	0.872	13.5383	5.53081	0.152334		0.0017118	0.872	6.7247	5.6752	0.138572		0.00125346	0.872	34.835	8.30598	0.114178		0.00152634	0.872	15.1511	8.62773	0.12319		0.00151021	0.872	4.3178	5.38891	0.213358
0.00203914	1.162	5.687	23.3618	1		0.00247754	1.162	13.6257	36.3072	1		0.00228109	1.162	6.7121	40.9548	1		0.00167032	1.162	35.847	72.7462	1		0.00203395	1.162	14.7514	70.0358	1		0.00201246	1.162	4.4926	25.2577	1
0.0025498	1.453	5.5586				0.003098	1.453	13.7022				0.00285235	1.453	6.6796				0.00208862	1.453	36.143				0.00254332	1.453	14.5111				0.00251644	1.453	4.6091
0.00306047	1.744	5.5815				0.00371845	1.744	14.3287				0.0034236	1.744	6.7015				0.00250692	1.744	36.67				0.00305268	1.744	14.2206				0.00302042	1.744	4.601
0.00356937	2.034	5.5533				0.00433677	2.034	15.2061				0.00399289	2.034	6.6544				0.00292378	2.034	37.527				0.00356029	2.034	14.0543				0.00352266	2.034	4.6644
0.00408004	2.325	5.4321				0.00495722	2.325	16.2172				0.00456415	2.325	6.5466				0.00334208	2.325	37.68				0.00406966	2.325	14.2161				0.00402664	2.325	4.6867
0.00458894	2.615	5.4652				0.00557554	2.615	17.1015				0.00513344	2.615	6.6322				0.00375894	2.615	37.922				0.00457727	2.615	13.9214				0.00452889	2.615	4.7647
0.00509961	2.906	5.4743				0.00619599	2.906	18.1344				0.00570469	2.906	6.5959				0.00417724	2.906	38.275				0.00508664	2.906	13.6929				0.00503287	2.906	4.8403
0.00560851	3.196	5.4867				0.00681431	3.196	19.0811				0.00627399	3.196	6.6778				0.00459411	3.196	37.89				0.00559425	3.196	13.4653				0.00553512	3.196	4.7378
0.00611918	3.487	5.623				0.00743476	3.487	20.1297				0.00684524	3.487	6.8912				0.00501241	3.487	37.032				0.00610361	3.487	12.9214				0.0060391	3.487	4.7944
0.00662984	3.778	5.6768				0.00805521	3.778	21.0293				0.0074165	3.778	6.7758				0.0054307	3.778	35.993				0.00661298	3.778	12.7994				0.00654308	3.778	5.0395
0.00713875	4.068	5.6993				0.00867353	4.068	21.4905				0.00798579	4.068	6.8367				0.00584757	4.068	35.203				0.00712059	4.068	12.7334				0.00704533	4.068	5.1283
0.00764941	4.359	5.7875				0.00929399	4.359	21.4387				0.00855704	4.359	6.7943				0.00626587	4.359	34.247				0.00762995	4.359	13.0793				0.00754931	4.359	5.1751
0.00815832	4.649	5.9144				0.00991231	4.649	21.5868				0.00912633	4.649	6.8576				0.00668273	4.649	32.77				0.00813757	4.649	13.3366				0.00805155	4.649	5.3197
0.00866898	4.94	5.8929				0.0105328	4.94	21.4402				0.00969759	4.94	7.0252				0.00710103	4.94	31.292				0.00864693	4.94	14.2867				0.00855553	4.94	5.3492
0.00917964	5.231	6.0912				0.0111532	5.231	20.9862				0.0102688	5.231	7.0318				0.00751933	5.231	29.75				0.00915629	5.231	15.6979				0.00905951	5.231	5.4973
0.00968855	5.521	6.0518				0.0117715	5.521	20.2293				0.0108381	5.521	7.2701				0.00793619	5.521	28.375				0.00966391	5.521	16.7018				0.00956176	5.521	5.7463
0.0101992	5.812	6.1462				0.012392	5.812	19.7009				0.0114094	5.812	7.2004				0.00835449	5.812	27.418				0.0101733	5.812	16.8529				0.0100657	5.812	5.8562
0.0107081	6.102	6.0579				0.0130103	6.102	19.0541				0.0119787	6.102	7.3593				0.00877135	6.102	26.588				0.0106809	6.102	17.3936				0.010568	6.102	5.936
0.0112188	6.393	6.1472				0.0136308	6.393	17.769				0.0125499	6.393	7.6483				0.00918965	6.393	25.473				0.0111902	6.393	18.7489				0.011072	6.393	6.0704
0.0117294	6.684	6.197				0.0142512	6.684	17.1429				0.0131212	6.684	7.9571				0.00960795	6.684	24.558				0.0116996	6.684	19.5417				0.011576	6.684	6.0961
0.0122384	6.974	6.3897				0.0148695	6.974	16.1921				0.0136905	6.974	8.2315				0.0100248	6.974	23.788				0.0122072	6.974	20.4908				0.0120782	6.974	6.27
0.012749	7.265	6.6187				0.01549	7.265	15.7087				0.0142617	7.265	8.316				0.0104431	7.265	23.235				0.0127166	7.265	21.1031				0.0125822	7.265	6.4919
0.0132579	7.555	7.0714				0.0161083	7.555	15.5167				0.014831	7.555	8.5961				0.01086	7.555	22.733				0.0132242	7.555	21.5237				0.0130844	7.555	6.8523
0.0137686	7.846	7.3826				0.0167287	7.846	15.0375				0.0154023	7.846	8.9564				0.0112783	7.846	22.413				0.0137336	7.846	22.258				0.0135884	7.846	7.3721
0.0142792	8.137	7.5288				0.0173492	8.137	14.9537				0.0159735	8.137	8.98				0.0116966	8.137	22.655				0.0142429	8.137	22.5058				0.0140924	8.137	7.574
0.0147882	8.427	7.444				0.0179675	8.427	14.9107				0.0165428	8.427	9.1908				0.0121134	8.427	23.522				0.0147505	8.427	22.361				0.0145946	8.427	7.8207
0.0152988	8.718	7.3612				0.018588	8.718	14.8365				0.0171141	8.718	9.3264				0.0125317	8.718	25.373				0.0152599	8.718	22.0592				0.0150986	8.718	7.7769
0.0158077	9.008	7.0696				0.0192063	9.008	14.9423				0.0176834	9.008	9.3712				0.0129486	9.008	27.907				0.0157675	9.008	22.0784				0.0156009	9.008	7.7703
0.0163184	9.299	7.0342				0.0198267	9.299	15.2011				0.0182546	9.299	9.3519				0.0133669	9.299	30.797				0.0162769	9.299	22.4867				0.0161048	9.299	7.6895
0.0168273	9.589	7.1127				0.0204451	9.589	15.7829				0.0188239	9.589	9.3349				0.0137838	9.589	34.018				0.0167845	9.589	24.1296				0.0166071	9.589	8.0093
0.017338	9.88	7.2418				0.0210655	9.88	16.9608				0.0193952	9.88	9.3891				0.0142021	9.88	37.415				0.0172939	9.88	26.4061				0.0171111	9.88	8.4407
0.0178486	10.171	7.4723				0.021686	10.171	17.6784				0.0199664	10.171	9.6159				0.0146204	10.171	40.553				0.0178032	10.171	28.2813				0.017615	10.171	8.9699
0.0183575	10.461	7.9789				0.0223043	10.461	18.9543				0.0205357	10.461	10.3996				0.0150372	10.461	43.387				0.0183108	10.461	29.8729				0.0181173	10.461	9.5138
0.0188682	10.752	8.4434				0.0229247	10.752	20.4763				0.021107	10.752	11.1714				0.0154555	10.752	46.44				0.0188202	10.752	32.2122				0.0186213	10.752	9.9178
0.0193771	11.042	8.9296				0.0235431	11.042	20.9604				0.0216763	11.042	12.254				0.0158724	11.042	49.47				0.0193278	11.042	33.5288				0.0191235	11.042	10.3102
0.0198878	11.333	9.0431				0.0241635	11.333	20.9072				0.0222475	11.333	13.7861				0.0162907	11.333	52.49				0.0198372	11.333	34.5681				0.0196275	11.333	10.7696
0.0203984	11.624	9.3026				0.024784	11.624	20.6038				0.0228188	11.624	15.7704				0.016709	11.624	55.643				0.0203465	11.624	35.4204				0.0201315	11.624	11.0869
0.0209073	11.914	9.52				0.0254023	11.914	20.2677				0.0233881	11.914	17.9008				0.0171258	11.914	59.198				0.0208542	11.914	36.0793				0.0206337	11.914	12.0799
0.021418	12.205	9.801				0.0260227	12.205	19.8568				0.0239593	12.205	19.616				0.0175441	12.205	63.085				0.0213635	12.205	36.9389				0.0211377	12.205	13.5619
0.0219269	12.495	10.0499				0.0266411	12.495	19.8497				0.0245286	12.495	20.7426				0.017961	12.495	66.31				0.0218711	12.495	37.6015				0.02164	12.495	15.2634
0.0224376	12.786	10.472				0.0272615	12.786	19.7896				0.0250999	12.786	21.5265				0.0183793	12.786	68.557				0.0223805	12.786	38.1166				0.0221439	12.786	16.7769
0.0229482	13.077	10.6993				0.027882	13.077	19.7784				0.0256711	13.077	21.7572				0.0187976	13.077	69.925				0.0228899	13.077	37.9884				0.0226479	13.077	18.4839
0.0234571	13.367	10.7673				0.0285003	13.367	19.982				0.0262404	13.367	21.6156				0.0192145	13.367	71.18				0.0233975	13.367	38.3444				0.0231502	13.367	19.9196
0.0239678	13.658	11.0785				0.0291207	13.658	20.1823				0.0268117	13.658	21.4361				0.0196328	13.658	72.777				0.0239068	13.658	39.5252				0.0236541	13.658	20.4705
0.0244767	13.948	11.757				0.029739	13.948	20.682				0.027381	13.948	21.556				0.0200496	13.948	74.833				0.0244145	13.948	41.94				0.0241564	13.948	20.8116
0.0249874	14.239	12.9063				0.0303595	14.239	20.9744				0.0279522	14.239	21.6006				0.0204679	14.239	77.145				0.0249238	14.239	44.4488				0.0246604	14.239	21.4114
0.025498	14.53	13.8034				0.03098	14.53	21.4223				0.0285235	14.53	22.2992				0.0208862	14.53	79.423				0.0254332	14.53	46.9318				0.0251644	14.53	21.3502
0.0260069	14.82	14.6959				0.0315983	14.82	21.5169				0.0290928	14.82	22.9536				0.0213031	14.82	80.538				0.0259408	14.82	48.7442				0.0256666	14.82	21.3001
0.0265176	15.111	15.3262				0.0322187	15.111	21.7605				0.029664	15.111	23.6309				0.0217214	15.111	80.532				0.0264502	15.111	49.9836				0.0261706	15.111	21.3402
0.0270265	15.401	15.7849				0.032837	15.401	21.7548				0.0302333	15.401	24.3308				0.0221382	15.401	80.602				0.0269578	15.401	49.4996				0.0266728	15.401	21.5359
0.0275372	15.692	15.8922				0.0334575	15.692	21.5103				0.0308046	15.692	25.5041				0.0225565	15.692	81.052				0.0274671	15.692	47.5564				0.0271768	15.692	21.3787
0.0280461	15.982	16.0435				0.0340758	15.982	21.3222				0.0313739	15.982	26.6041				0.0229734	15.982	81.677				0.0279747	15.982	46.8042				0.0276791	15.982	21.0699
0.0285567	16.273	16.4113				0.0346963	16.273	21.0468				0.0319451	16.273	28.0472				0.0233917	16.273	82.808				0.0284841	16.273	46.3805				0.028183	16.273	20.6116
0.0290674	16.564	16.5174				0.0353167	16.564	20.8324				0.0325164	16.564	29.8572				0.02381	16.564	84.195				0.0289935	16.564	46.6436				0.028687	16.564	20.5933
0.0295763	16.854	16.9104				0.035935	16.854	20.9198				0.0330857	16.854	31.9902				0.0242269	16.854	85.297				0.0295011	16.854	47.5627				0.0291893	16.854	21.0916
0.030087	17.145	17.4315				0.0365555	17.145	20.628				0.0336569	17.145	35.2612				0.0246452	17.145	86.453				0.0300104	17.145	48.2995				0.0296932	17.145	20.9591
0.0305959	17.435	17.8613				0.0371738	17.435	20.8457				0.0342262	17.435	38.2209				0.025062	17.435	87.257				0.0305181	17.435	49.1951				0.0301955	17.435	20.6291
0.0311065	17.726	17.9142				0.0377943	17.726	21.3294				0.0347975	17.726	39.8976				0.0254803	17.726	88.047				0.0310274	17.726	51.5359				0.0306995	17.726	20.0631
0.0316172	18.017	17.784				0.0384147	18.017	22.0776				0.0353687	18.017	40.0656				0.0258986	18.017	88.985				0.0315368	18.017	54.443				0.0312035	18.017	19.282
0.0321261	18.307	17.4394				0.039033	18.307	23.0563				0.035938	18.307	38.6625				0.0263155	18.307	89.595				0.0320444	18.307	57.7707				0.0317057	18.307	18.9248
0.0326368	18.598	16.9809				0.0396535	18.598	23.995				0.0365093	18.598	37.1602				0.0267338	18.598	89.802				0.0325538	18.598	61.8823				0.0322097	18.598	18.4421
0.0331457	18.888	16.4846				0.0402718	18.888	24.9538				0.0370786	18.888	35.5852				0.0271506	18.888	89.932				0.0330614	18.888	65.5247				0.0327119	18.888	17.9057
0.0336563	19.179	15.8514				0.0408923	19.179	25.8685				0.0376498	19.179	34.7546				0.0275689	19.179	89.88				0.0335707	19.179	68.3161				0.0332159	19.179	17.3176
0.034167	19.47	15.3971				0.0415127	19.47	27.0683				0.0382211	19.47	35.9157				0.0279872	19.47	89.035				0.0340801	19.47	69.7502				0.0337199	19.47	17.2021
0.0346759	19.76	14.6464				0.042131	19.76	28.1026				0.0387904	19.76	38.5667				0.0284041	19.76	88.267				0.0345877	19.76	70.4677				0.0342221	19.76	16.9153
0.0351866	20.051	13.7298				0.0427515	20.051	30.2379				0.0393616	20.051	40.2491				0.0288224	20.051	87.638				0.0350971	20.051	72.1548				0.0347261	20.051	16.7412
0.0356955	20.341	12.702				0.0433698	20.341	31.7806				0.0399309	20.341	41.3175				0.0292393	20.341	86.52				0.0356047	20.341	73.7744				0.0352284	20.341	16.5407
0.0362061	20.632	11.7008				0.0439903	20.632	32.5846				0.0405022	20.632	41.0579				0.0296576	20.632	85.9				0.0361141	20.632	75.3225				0.0357323	20.632	16.4032
0.0367168	20.923	10.94				0.0446107	20.923	32.7436				0.0410734	20.923	41.0461				0.0300759	20.923	84.597				0.0366234	20.923	77.9858				0.0362363	20.923	16.0428
0.0372257	21.213	10.154				0.045229	21.213	32.4899				0.0416427	21.213	41.3627				0.0304927	21.213	82.418				0.037131	21.213	80.106				0.0367386	21.213	15.2098
0.0377364	21.504	9.5371				0.0458495	21.504	31.6649				0.042214	21.504	41.454				0.030911	21.504	80.588				0.0376404	21.504	81.8083				0.0372426	21.504	14.1067
0.0382453	21.794	8.8491				0.0464678	21.794	30.859				0.0427832	21.794	41.9161				0.0313279	21.794	79.545				0.038148	21.794	82.5037				0.0377448	21.794	13.2819
0.0387559	22.085	8.5648				0.0470882	22.085	29.5226				0.0433545	22.085	42.0177				0.0317462	22.085	79.38				0.0386574	22.085	82.2612				0.0382488	22.085	12.5759
0.0392649	22.375	8.3299				0.0477066	22.375	28.6674				0.0439238	22.375	42.3122				0.0321631	22.375	79.932				0.039165	22.375	81.8666				0.038751	22.375	12.0596
0.0397755	22.666	7.8397				0.048327	22.666	27.9927				0.044495	22.666	42.2606				0.0325814	22.666	80.977				0.0396744	22.666	81.0467				0.039255	22.666	11.5698
0.0402862	22.957	7.4294				0.0489475	22.957	27.4167				0.0450663	22.957	42.1207				0.0329997	22.957	81.862				0.0401837	22.957	80.3517				0.039759	22.957	11.1263
0.0407951	23.247	7.3427				0.0495658	23.247	26.7318				0.0456356	23.247	41.6639				0.0334165	23.247	82.532				0.0406913	23.247	79.9615				0.0402612	23.247	10.8754
0.0413058	23.538	7.0725				0.0501862	23.538	25.5441				0.0462068	23.538	40.8891				0.0338348	23.538	82.72				0.0412007	23.538	79.861				0.0407652	23.538	10.7656
0.0418147	23.828	6.8756				0.0508046	23.828	24.2457				0.0467761	23.828	40.3318				0.0342517	23.828	82.485				0.0417083	23.828	79.4397				0.0412675	23.828	10.4153
0.0423253	24.119	6.8802				0.051425	24.119	23.1122				0.0473474	24.119	39.7123				0.03467	24.119	81.235				0.0422177	24.119	78.7351				0.0417714	24.119	10.1749
0.042836	24.41	6.6868				0.0520455	24.41	22.4028				0.0479187	24.41	39.5808				0.0350883	24.41	79.643				0.042727	24.41	77.0938				0.0422754	24.41	10.0086
0.0433449	24.7	6.7099				0.0526638	24.7	21.9537				0.0484879	24.7	39.4806				0.0355051	24.7	78.98				0.0432347	24.7	76.1339				0.0427777	24.7	9.5667
0.0438556	24.991	6.6259				0.0532842	24.991	22.0427				0.0490592	24.991	39.4446				0.0359234	24.991	79.317				0.043744	24.991	74.4755				0.0432817	24.991	9.0905
0.0443645	25.281	6.579				0.0539026	25.281	22.0164				0.0496285	25.281	40.0098				0.0363403	25.281	80.868				0.0442516	25.281	72.5811				0.0437839	25.281	8.8055
0.0448751	25.572	6.665				0.054523	25.572	22.1198				0.0501997	25.572	40.1517				0.0367586	25.572	83.153				0.044761	25.572	71.8841				0.0442879	25.572	8.3523
0.0453858	25.863	6.6538				0.0551435	25.863	22.0459				0.050771	25.863	39.1928				0.0371769	25.863	85.46				0.0452704	25.863	70.7543				0.0447919	25.863	8.0487
0.0458947	26.153	6.7135				0.0557618	26.153	22.0237				0.0513403	26.153	37.6351				0.0375938	26.153	88.172				0.045778	26.153	70.1631				0.0452941	26.153	7.9989
0.0464054	26.444	6.6553				0.0563822	26.444	22.3011				0.0519115	26.444	36.6385				0.0380121	26.444	90.982				0.0462873	26.444	68.4274				0.0457981	26.444	7.8929
0.0469143	26.734	6.5993				0.0570006	26.734	22.3818				0.0524808	26.734	36.5236				0.0384289	26.734	92.808				0.0467949	26.734	64.7766				0.0463003	26.734	7.8958
0.0474249	27.025	6.6267				0.057621	27.025	22.3546				0.0530521	27.025	37.4601				0.0388472	27.025	93.628				0.0473043	27.025	60.5679				0.0468043	27.025	7.9566
0.0479356	27.316	6.5129				0.0582415	27.316	23.0287				0.0536233	27.316	38.4945				0.0392655	27.316	94.813				0.0478137	27.316	57.1961				0.0473083	27.316	8.2325
0.0484445	27.606	6.4636				0.0588598	27.606	24.0134				0.0541926	27.606	39.902				0.0396824	27.606	97.07				0.0483213	27.606	54.3995				0.0478105	27.606	8.4809
0.0489552	27.897	6.4961				0.0594802	27.897	24.9262				0.0547639	27.897	41.8151				0.0401007	27.897	100.273				0.0488307	27.897	52.2238				0.0483145	27.897	8.7241
0.0494641	28.187	6.5019				0.0600985	28.187	25.8971				0.0553332	28.187	43.4334				0.0405175	28.187	104.777				0.0493383	28.187	50.442				0.0488168	28.187	8.6792
0.0499747	28.478	6.5169				0.060719	28.478	26.5514				0.0559044	28.478	44.7127				0.0409358	28.478	108.707				0.0498476	28.478	49.627				0.0493208	28.478	8.651
0.0504836	28.768	6.5227				0.0613373	28.768	26.7001				0.0564737	28.768	44.9715				0.0413527	28.768	112.142				0.0503552	28.768	48.7302				0.049823	28.768	8.6988
0.0509943	29.059	6.4592				0.0619578	29.059	26.0058				0.057045	29.059	43.8803				0.041771	29.059	114.243				0.0508646	29.059	48.1465				0.050327	29.059	9.1559
0.051505	29.35	6.2782				0.0625782	29.35	25.0648				0.0576162	29.35	42.816				0.0421893	29.35	113.643				0.051374	29.35	48.187				0.050831	29.35	9.846
0.0520139	29.64	6.3361				0.0631965	29.64	23.6428				0.0581855	29.64	41.6137				0.0426062	29.64	111.39				0.0518816	29.64	48.7014				0.0513332	29.64	10.3117
0.0525245	29.931	6.4249				0.063817	29.931	22.7257				0.0587568	29.931	41.2782				0.0430245	29.931	109.122				0.0523909	29.931	49.7796				0.0518372	29.931	10.5455
0.0530334	30.221	6.6611				0.0644353	30.221	22.2411				0.0593261	30.221	40.724				0.0434413	30.221	107.42				0.0528986	30.221	50.4831				0.0523394	30.221	10.6902
0.0535441	30.512	6.6851				0.0650558	30.512	22.2486				0.0598973	30.512	40.3137				0.0438596	30.512	104.367				0.0534079	30.512	51.5527				0.0528434	30.512	10.5065
0.0540548	30.803	6.8901				0.0656762	30.803	22.4694				0.0604686	30.803	39.9457				0.0442779	30.803	99.725				0.0539173	30.803	53.4012				0.0533474	30.803	10.28
0.0545637	31.093	6.8228				0.0662945	31.093	22.1556				0.0610379	31.093	39.6657				0.0446948	31.093	93.688				0.0544249	31.093	55.6793				0.0538496	31.093	10.1121
0.0550743	31.384	6.9109				0.066915	31.384	21.3092				0.0616091	31.384	39.7856				0.0451131	31.384	87.425				0.0549343	31.384	57.7992				0.0543536	31.384	10.5089
0.0555832	31.674	7.2273				0.0675333	31.674	20.805				0.0621784	31.674	38.379				0.0455299	31.674	82.118				0.0554419	31.674	59.059				0.0548559	31.674	10.8049
0.0560939	31.965	7.1677				0.0681538	31.965	20.7901				0.0627497	31.965	36.7433				0.0459482	31.965	78.428				0.0559512	31.965	59.857				0.0553599	31.965	11.0215
0.0566046	32.256	7.4417				0.0687742	32.256	21.5324				0.0633209	32.256	35.0183				0.0463665	32.256	76.357				0.0564606	32.256	60.6687				0.0558638	32.256	11.8456
0.0571135	32.546	7.7177				0.0693925	32.546	22.3628				0.0638902	32.546	32.7816				0.0467834	32.546	75.155				0.0569682	32.546	60.6044				0.0563661	32.546	12.4229
0.0576241	32.837	7.9664				0.070013	32.837	23.5741				0.0644615	32.837	31.1842				0.0472017	32.837	74.848				0.0574776	32.837	60.7117				0.0568701	32.837	12.3224
0.058133	33.127	8.2346				0.0706313	33.127	24.374				0.0650308	33.127	29.7929				0.0476186	33.127	74.733				0.0579852	33.127	61.1213				0.0573723	33.127	11.7534
0.0586437	33.418	8.7564				0.0712518	33.418	24.7683				0.065602	33.418	29.1359				0.0480369	33.418	74.657				0.0584946	33.418	61.9435				0.0578763	33.418	11.8375
0.0591544	33.709	9.1355				0.0718722	33.709	25.0473				0.0661733	33.709	28.6368				0.0484552	33.709	74.497				0.0590039	33.709	62.1229				0.0583803	33.709	12.1781
0.0596633	33.999	9.8154				0.0724905	33.999	25.0727				0.0667426	33.999	28.0773				0.048872	33.999	74.033				0.0595115	33.999	62.6091				0.0588825	33.999	12.9476
0.0601739	34.29	10.0118				0.073111	34.29	25.1572				0.0673138	34.29	27.6857				0.0492903	34.29	73.43				0.0600209	34.29	62.4966				0.0593865	34.29	13.5925
0.0606828	34.58	10.1749				0.0737293	34.58	24.5799				0.0678831	34.58	27.0482				0.0497072	34.58	73.177				0.0605285	34.58	62.1732				0.0598887	34.58	14.4563
0.0611935	34.871	10.6443				0.0743498	34.871	23.6229				0.0684544	34.871	26.788				0.0501255	34.871	73.878				0.0610379	34.871	61.2352				0.0603927	34.871	15.5088
0.0617024	35.161	10.8812				0.0749681	35.161	22.8286				0.0690237	35.161	26.6778				0.0505424	35.161	74.953				0.0615455	35.161	59.4114				0.060895	35.161	16.9892
0.0622131	35.452	10.9819				0.0755885	35.452	22.0895				0.0695949	35.452	26.6154				0.0509607	35.452	76.545				0.0620549	35.452	56.4027				0.061399	35.452	18.7567
0.0627237	35.743	11.1355				0.076209	35.743	21.5322				0.0701662	35.743	26.4109				0.051379	35.743	78.395				0.0625642	35.743	52.8634				0.0619029	35.743	20.435
0.0632327	36.033	11.2005				0.0768273	36.033	21.0989				0.0707355	36.033	26.5257				0.0517958	36.033	80.187				0.0630718	36.033	48.8768				0.0624052	36.033	21.5091
0.0637433	36.324	11.3706				0.0774477	36.324	20.8931				0.0713067	36.324	26.4043				0.0522141	36.324	82.743				0.0635812	36.324	44.5755				0.0629092	36.324	21.4816
0.0642522	36.614	11.765				0.0780661	36.614	20.7289				0.071876	36.614	27.0456				0.052631	36.614	85.387				0.0640888	36.614	40.4647				0.0634114	36.614	21.9618
0.0647629	36.905	11.9907				0.0786865	36.905	21.4487				0.0724473	36.905	27.6421				0.0530493	36.905	87.083				0.0645982	36.905	37.8609				0.0639154	36.905	23.7956
0.0652735	37.196	12.3186				0.079307	37.196	21.6842				0.0730185	37.196	28.7606				0.0534676	37.196	87.597				0.0651075	37.196	35.9055				0.0644194	37.196	25.4819
0.0657825	37.486	12.6396				0.0799253	37.486	21.933				0.0735878	37.486	30.006				0.0538844	37.486	86.323				0.0656151	37.486	35.5655				0.0649216	37.486	26.386
0.0662931	37.777	12.909				0.0805457	37.777	23.0257				0.0741591	37.777	31.0913				0.0543027	37.777	83.54				0.0661245	37.777	35.1461				0.0654256	37.777	26.9447
0.066802	38.067	13.641				0.0811641	38.067	23.7332				0.0747284	38.067	31.9312				0.0547196	38.067	81.368				0.0666321	38.067	35.3124				0.0659278	38.067	27.4691
0.0673127	38.358	14.0494				0.0817845	38.358	24.6383				0.0752996	38.358	32.0196				0.0551379	38.358	79.94				0.0671415	38.358	35.5446				0.0664318	38.358	27.6637
0.0678233	38.649	14.6555				0.082405	38.649	25.1981				0.0758709	38.649	31.7117				0.0555562	38.649	78.545				0.0676509	38.649	35.2953				0.0669358	38.649	27.4067
0.0683323	38.939	15.3913				0.0830233	38.939	25.8476				0.0764402	38.939	32.4256				0.0559731	38.939	77.68				0.0681585	38.939	35.6164				0.0674381	38.939	26.5061
0.0688429	39.23	16.4295				0.0836437	39.23	25.7741				0.0770114	39.23	34.9654				0.0563914	39.23	77.233				0.0686678	39.23	35.1876				0.067942	39.23	25.3928
0.0693518	39.52	17.2742				0.0842621	39.52	25.7919				0.0775807	39.52	38.5211				0.0568082	39.52	77.002				0.0691754	39.52	35.1428				0.0684443	39.52	24.9085
0.0698625	39.811	17.9211				0.0848825	39.811	24.9455				0.078152	39.811	40.7226				0.0572265	39.811	77.263				0.0696848	39.811	35.0841				0.0689483	39.811	24.6418
0.0703732	40.102	18.9069				0.085503	40.102	23.9694				0.0787232	40.102	40.2136				0.0576448	40.102	78.177				0.0701942	40.102	34.4469				0.0694522	40.102	24.7974
0.0708821	40.392	19.696				0.0861213	40.392	23.4806				0.0792925	40.392	36.5549				0.0580617	40.392	79.612				0.0707018	40.392	33.9211				0.0699545	40.392	25.0917
0.0713927	40.683	20.3269				0.0867417	40.683	22.8383				0.0798638	40.683	32.4342				0.05848	40.683	81.418				0.0712111	40.683	34.1012				0.0704585	40.683	26.326
0.0719016	40.973	21.4866				0.0873601	40.973	21.8947				0.0804331	40.973	29.9647				0.0588968	40.973	82.82				0.0717188	40.973	34.1414				0.0709607	40.973	27.9384
0.0724123	41.264	22.9695				0.0879805	41.264	21.0261				0.0810043	41.264	28.552				0.0593151	41.264	83.593				0.0722281	41.264	34.2739				0.0714647	41.264	28.4659
0.0729212	41.554	25.2688				0.0885988	41.554	20.1917				0.0815736	41.554	27.1592				0.059732	41.554	84.223				0.0727357	41.554	34.0219				0.0719669	41.554	28.2172
0.0734319	41.845	27.2401				0.0892193	41.845	19.4533				0.0821449	41.845	26.5778				0.0601503	41.845	84.393				0.0732451	41.845	34.2102				0.0724709	41.845	26.3393
0.0739425	42.136	28.3737				0.0898397	42.136	18.7211				0.0827161	42.136	26.635				0.0605686	42.136	84.468				0.0737545	42.136	34.5943				0.0729749	42.136	23.681
0.0744514	42.426	29.5385				0.090458	42.426	18.376				0.0832854	42.426	27.0371				0.0609855	42.426	83.978				0.0742621	42.426	35.1437				0.0734771	42.426	21.13
0.0749621	42.717	30.5088				0.0910785	42.717	18.2359				0.0838567	42.717	27.5324				0.0614038	42.717	82.905				0.0747714	42.717	34.699				0.0739811	42.717	18.9504
0.075471	43.007	31.3016				0.0916968	43.007	18.772				0.0844259	43.007	27.9868				0.0618206	43.007	82.033				0.0752791	43.007	34.1021				0.0744834	43.007	16.9489
0.0759817	43.298	31.7213				0.0923173	43.298	19.5693				0.0849972	43.298	27.7228				0.0622389	43.298	80.47				0.0757884	43.298	34.0113				0.0749874	43.298	15.7608
0.0764923	43.589	31.3154				0.0929377	43.589	20.8306				0.0855685	43.589	27.0104				0.0626572	43.589	79.538				0.0762978	43.589	34.7917				0.0754913	43.589	14.868
0.0770012	43.879	30.5329				0.093556	43.879	21.9631				0.0861377	43.879	25.8617				0.0630741	43.879	79.157				0.0768054	43.879	35.6375				0.0759936	43.879	13.8203
0.0775119	44.17	30.4798				0.0941765	44.17	22.055				0.086709	44.17	24.9217				0.0634924	44.17	78.072				0.0773148	44.17	36.2151				0.0764976	44.17	13.2196
0.0780208	44.46	30.2847				0.0947948	44.46	21.6456				0.0872783	44.46	24.3466				0.0639092	44.46	77.69				0.0778224	44.46	36.1109				0.0769998	44.46	12.7006
0.0785315	44.751	29.5575				0.0954153	44.751	20.9386				0.0878495	44.751	23.7211				0.0643275	44.751	78.392				0.0783317	44.751	36.0378				0.0775038	44.751	12.2356
0.0790421	45.042	27.8027				0.0960357	45.042	20.0296				0.0884208	45.042	23.4365				0.0647458	45.042	78.747				0.0788411	45.042	35.5895				0.0780078	45.042	12.011
0.079551	45.332	26.3829				0.096654	45.332	19.3405				0.0889901	45.332	23.2106				0.0651627	45.332	78.427				0.0793487	45.332	35.3272				0.07851	45.332	12.0811
0.0800617	45.623	24.8097				0.0972745	45.623	18.9165				0.0895614	45.623	23.0145				0.065581	45.623	78.24				0.0798581	45.623	34.9699				0.079014	45.623	11.7338
0.0805706	45.913	22.7979				0.0978928	45.913	18.5635				0.0901306	45.913	22.3759				0.0659979	45.913	78.15				0.0803657	45.913	34.8457				0.0795162	45.913	11.2257
0.0810813	46.204	20.9385				0.0985133	46.204	18.2887				0.0907019	46.204	22.3098				0.0664162	46.204	77.633				0.0808751	46.204	34.7243				0.0800202	46.204	10.6081
0.0815919	46.495	19.3619				0.0991337	46.495	17.9114				0.0912732	46.495	21.9484				0.0668345	46.495	76.592				0.0813844	46.495	34.5024				0.0805242	46.495	10.0119
0.0821008	46.785	17.6595				0.099752	46.785	17.2916				0.0918424	46.785	21.714				0.0672513	46.785	75.163				0.081892	46.785	34.8092				0.0810265	46.785	9.505
0.0826115	47.076	16.2459				0.100372	47.076	16.7336				0.0924137	47.076	21.5324				0.0676696	47.076	73.805				0.0824014	47.076	35.0544				0.0815304	47.076	9.0951
0.0831204	47.366	15.5623				0.100991	47.366	16.7689				0.092983	47.366	21.9919				0.0680865	47.366	72.145				0.082909	47.366	34.1749				0.0820327	47.366	8.8739
0.0836311	47.657	14.9744				0.101611	47.657	16.5058				0.0935542	47.657	22.398				0.0685048	47.657	70.243				0.0834184	47.657	33.7479				0.0825367	47.657	8.6654
0.08414	47.947	14.4039				0.10223	47.947	16.2848				0.0941235	47.947	22.6673				0.0689217	47.947	68.797				0.083926	47.947	33.6236				0.0830389	47.947	9.0387
0.0846506	48.238	14.0531				0.10285	48.238	16.165				0.0946948	48.238	23.1467				0.0693399	48.238	67.448				0.0844354	48.238	34.2853				0.0835429	48.238	9.4957
0.0851613	48.529	13.4573				0.10347	48.529	16.0464				0.095266	48.529	23.31				0.0697582	48.529	65.967				0.0849447	48.529	35.1608				0.0840469	48.529	9.8993
0.0856702	48.819	12.9567				0.104089	48.819	15.9231				0.0958353	48.819	22.3541				0.0701751	48.819	64.723				0.0854523	48.819	35.9978				0.0845491	48.819	10.1242
0.0861809	49.11	12.3282				0.104709	49.11	15.945				0.0964066	49.11	20.4875				0.0705934	49.11	63.487				0.0859617	49.11	36.5005				0.0850531	49.11	10.3833
0.0866898	49.4	12.2619				0.105328	49.4	15.907				0.0969759	49.4	18.41				0.0710103	49.4	61.647				0.0864693	49.4	36.2793				0.0855553	49.4	10.677
0.0872004	49.691	12.0307				0.105948	49.691	16.0917				0.0975471	49.691	17.5022				0.0714286	49.691	59.882				0.0869787	49.691	36.0863				0.0860593	49.691	10.7937
0.0877111	49.982	11.8146				0.106568	49.982	16.1626				0.0981184	49.982	16.8621				0.0718469	49.982	58.292				0.087488	49.982	35.8286				0.0865633	49.982	10.4292
0.08822	50.272	11.7415				0.107187	50.272	16.628				0.0986877	50.272	16.0516				0.0722637	50.272	56.553				0.0879956	50.272	35.6737				0.0870656	50.272	9.8998
0.0887307	50.563	11.4436				0.107807	50.563	17.0097				0.0992589	50.563	15.6304				0.072682	50.563	55.423				0.088505	50.563	35.8915				0.0875695	50.563	9.6204
0.0892396	50.853	11.0879				0.108426	50.853	17.5278				0.0998282	50.853	15.432				0.0730989	50.853	55.103				0.0890126	50.853	35.6134				0.0880718	50.853	9.6353
0.0897502	51.144	10.5477				0.109046	51.144	18.0477				0.100399	51.144	15.2952				0.0735172	51.144	55.622				0.089522	51.144	35.9155				0.0885758	51.144	9.4855
0.0902609	51.435	10.1798				0.109666	51.435	18.1126				0.100971	51.435	15.3941				0.0739355	51.435	56.982				0.0900313	51.435	35.8426				0.0890797	51.435	9.4918
0.0907698	51.725	9.927				0.110285	51.725	18.5337				0.10154	51.725	15.6037				0.0743524	51.725	58.602				0.090539	51.725	35.7443				0.089582	51.725	9.5352
0.0912805	52.016	9.6718				0.110905	52.016	18.8579				0.102111	52.016	15.5721				0.0747707	52.016	59.655				0.0910483	52.016	35.9688				0.090086	52.016	9.7508
0.0917894	52.306	9.5969				0.111524	52.306	18.5463				0.102681	52.306	15.7728				0.0751875	52.306	60.347				0.0915559	52.306	35.9936				0.0905882	52.306	9.9586
0.0923001	52.597	9.1605				0.112144	52.597	17.9317				0.103252	52.597	16.4216				0.0756058	52.597	61.497				0.0920653	52.597	35.644				0.0910922	52.597	10.2103
0.0928107	52.888	8.999				0.112764	52.888	17.6123				0.103823	52.888	17.6832				0.0760241	52.888	62.287				0.0925747	52.888	35.3406				0.0915962	52.888	9.9958
0.0933196	53.178	8.78				0.113383	53.178	17.1927				0.104392	53.178	18.8881				0.076441	53.178	62.448				0.0930823	53.178	35.3842				0.0920984	53.178	9.4606
0.0938303	53.469	8.988				0.114003	53.469	16.6503				0.104964	53.469	20.1314				0.0768593	53.469	63.083				0.0935916	53.469	35.2408				0.0926024	53.469	8.9121
0.0943392	53.759	9.0423				0.114622	53.759	16.4323				0.105533	53.759	21.1886				0.0772761	53.759	64.372				0.0940993	53.759	34.9625				0.0931047	53.759	8.6577
0.0948499	54.05	8.9268				0.115242	54.05	16.4694				0.106104	54.05	22.4648				0.0776944	54.05	65.717				0.0946086	54.05	35.2349				0.0936086	54.05	8.755
0.0953588	54.34	8.8911				0.11586	54.34	16.8394				0.106673	54.34	24.3686				0.0781113	54.34	66.943				0.0951162	54.34	35.7377				0.0941109	54.34	9.0324
0.0958694	54.631	8.8731				0.116481	54.631	17.4679				0.107245	54.631	27.2064				0.0785296	54.631	67.552				0.0956256	54.631	36.0395				0.0946149	54.631	9.2329
0.0963801	54.922	8.8731				0.117101	54.922	17.6698				0.107816	54.922	30.0237				0.0789479	54.922	67.702				0.096135	54.922	36.4947				0.0951188	54.922	9.3752
0.096889	55.212	8.76				0.11772	55.212	18.2932				0.108385	55.212	33.0744				0.0793648	55.212	67.57				0.0966426	55.212	35.9179				0.0956211	55.212	9.5364
0.0973997	55.503	8.9407				0.11834	55.503	18.595				0.108957	55.503	36.3732				0.0797831	55.503	66.692				0.0971519	55.503	35.647				0.0961251	55.503	9.7664
0.0979086	55.793	9.0852				0.118958	55.793	18.9111				0.109526	55.793	38.7101				0.0801999	55.793	65.527				0.0976596	55.793	35.4603				0.0966273	55.793	10.1091
0.0984192	56.084	9.0836				0.119579	56.084	18.854				0.110097	56.084	40.1892				0.0806182	56.084	64.985				0.0981689	56.084	35.8504				0.0971313	56.084	10.5774
0.0989299	56.375	9.2609				0.120199	56.375	18.7019				0.110668	56.375	41.3372				0.0810365	56.375	64.858				0.0986783	56.375	36.2316				0.0976353	56.375	10.9511
0.0994388	56.665	9.5469				0.120818	56.665	18.3128				0.111238	56.665	43.0219				0.0814534	56.665	64.385				0.0991859	56.665	37.1708				0.0981375	56.665	11.2994
0.0999495	56.956	10.0694				0.121438	56.956	17.8793				0.111809	56.956	43.3648				0.0818717	56.956	63.827				0.0996953	56.956	37.6845				0.0986415	56.956	11.6691
0.100458	57.246	10.2362				0.122056	57.246	17.7284				0.112378	57.246	42.1092				0.0822885	57.246	63.678				0.100203	57.246	38.21				0.0991438	57.246	12.0031
0.100969	57.537	10.485				0.122677	57.537	17.9931				0.112949	57.537	40.2905				0.0827068	57.537	63.505				0.100712	57.537	38.9525				0.0996477	57.537	12.6636
0.10148	57.828	10.5731				0.123297	57.828	18.4111				0.113521	57.828	38.3006				0.0831251	57.828	63.197				0.101222	57.828	40.3006				0.100152	57.828	13.0336
0.101989	58.118	10.4572				0.123916	58.118	19.1079				0.11409	58.118	35.9297				0.083542	58.118	63.238				0.101729	58.118	42.112				0.100654	58.118	13.5634
0.102499	58.409	10.307				0.124536	58.409	19.2452				0.114661	58.409	33.489				0.0839603	58.409	63.192				0.102239	58.409	44.3186				0.101158	58.409	14.0511
0.103008	58.699	10.1659				0.125154	58.699	19.6638				0.115231	58.699	31.2265				0.0843772	58.699	62.813				0.102746	58.699	44.3846				0.10166	58.699	14.4242
0.103519	58.99	9.9652				0.125775	58.99	18.9457				0.115802	58.99	28.8706				0.0847955	58.99	62.75				0.103256	58.99	43.4402				0.102164	58.99	14.3464
0.104028	59.28	9.8246				0.126393	59.28	18.7251				0.116371	59.28	26.3117				0.0852123	59.28	63.145				0.103763	59.28	41.8928				0.102666	59.28	13.9554
0.104538	59.571	9.5209				0.127014	59.571	18.6126				0.116942	59.571	24.0595				0.0856306	59.571	64.002				0.104273	59.571	40.4407				0.10317	59.571	13.4429
0.105049	59.862	9.5988				0.127634	59.862	19.2166				0.117514	59.862	20.777				0.0860489	59.862	64.732				0.104782	59.862	39.5429				0.103674	59.862	12.7753
0.105558	60.152	9.5576				0.128252	60.152	19.3052				0.118083	60.152	18.2036				0.0864658	60.152	65.027				0.10529	60.152	38.7664				0.104177	60.152	12.3682
0.106069	60.443	9.5575				0.128873	60.443	18.7763				0.118654	60.443	16.8842				0.0868841	60.443	65.24				0.105799	60.443	37.5285				0.104681	60.443	11.9822
0.106578	60.733	9.6562				0.129491	60.733	17.9811				0.119223	60.733	16.5414				0.0873009	60.733	65.055				0.106306	60.733	36.7354				0.105183	60.733	11.8781
0.107088	61.024	9.9244				0.130112	61.024	16.9392				0.119795	61.024	16.2996				0.0877192	61.024	64.365				0.106816	61.024	35.6917				0.105687	61.024	11.7845
0.107599	61.315	10.0872				0.130732	61.315	16.5264				0.120366	61.315	16.2368				0.0881375	61.315	62.877				0.107325	61.315	34.4048				0.106191	61.315	11.8224
0.108108	61.605	10.0891				0.13135	61.605	16.1391				0.120935	61.605	16.1934				0.0885544	61.605	61.382				0.107833	61.605	33.2051				0.106693	61.605	11.8679
0.108618	61.896	10.0921				0.131971	61.896	15.824				0.121506	61.896	16.0857				0.0889727	61.896	60.23				0.108342	61.896	32.7141				0.107197	61.896	11.7064
0.109127	62.186	10.1846				0.132589	62.186	15.8781				0.122076	62.186	16.0101				0.0893896	62.186	58.975				0.10885	62.186	32.0359				0.107699	62.186	11.5823
0.109638	62.477	10.4172				0.13321	62.477	16.0775				0.122647	62.477	15.929				0.0898079	62.477	57.855				0.109359	62.477	31.6471				0.108203	62.477	11.1414
0.110149	62.768	10.3347				0.13383	62.768	16.2905				0.123218	62.768	16.0065				0.0902262	62.768	56.615				0.109869	62.768	31.3923				0.108707	62.768	10.6287
0.110658	63.058	10.3374				0.134448	63.058	16.1274				0.123788	63.058	16.0966				0.090643	63.058	55.238				0.110376	63.058	31.126				0.109209	63.058	10.3184
0.111168	63.349	10.3299				0.135069	63.349	16.2397				0.124359	63.349	16.2656				0.0910613	63.349	54.148				0.110886	63.349	31.1352				0.109713	63.349	9.8818
0.111677	63.639	10.5557				0.135687	63.639	16.0109				0.124928	63.639	16.3289				0.0914782	63.639	53.678				0.111393	63.639	31.6048				0.110216	63.639	9.6028
0.112188	63.93	10.6005				0.136308	63.93	15.6744				0.125499	63.93	16.3347				0.0918965	63.93	53.623				0.111902	63.93	31.2171				0.11072	63.93	9.4735
0.112698	64.221	10.9116				0.136928	64.221	15.3553				0.126071	64.221	15.6283				0.0923148	64.221	53.493				0.112412	64.221	30.6689				0.111224	64.221	9.5285
0.113207	64.511	11.2243				0.137546	64.511	15.1245				0.12664	64.511	15.4393				0.0927317	64.511	53.498				0.112919	64.511	30.52				0.111726	64.511	9.5068
0.113718	64.802	11.4926				0.138167	64.802	15.0215				0.127211	64.802	15.1452				0.09315	64.802	53.153				0.113429	64.802	30.7708				0.11223	64.802	9.7044
0.114227	65.092	11.8125				0.138785	65.092	14.7088				0.12778	65.092	15.1379				0.0935668	65.092	52.908				0.113936	65.092	31.1544				0.112732	65.092	9.7771
0.114738	65.383	11.6978				0.139406	65.383	14.4623				0.128352	65.383	15.395				0.0939851	65.383	53.39				0.114446	65.383	31.166				0.113236	65.383	9.7469
0.115247	65.673	11.6725				0.140024	65.673	14.2342				0.128921	65.673	15.1056				0.094402	65.673	54.062				0.114953	65.673	31.3366				0.113738	65.673	9.796
0.115757	65.964	11.5534				0.140644	65.964	14.3034				0.129492	65.964	14.908				0.0948203	65.964	54.515				0.115463	65.964	31.1369				0.114242	65.964	10.0298
0.116268	66.255	11.3551				0.141265	66.255	14.3215				0.130064	66.255	15.0231				0.0952386	66.255	54.663				0.115972	66.255	30.7801				0.114746	66.255	10.1018
0.116777	66.545	11.4627				0.141883	66.545	14.2805				0.130633	66.545	15.0275				0.0956554	66.545	54.605				0.11648	66.545	30.177				0.115249	66.545	10.0146
0.117287	66.836	11.694				0.142504	66.836	14.5257				0.131204	66.836	15.1495				0.0960737	66.836	54.778				0.116989	66.836	29.6176				0.115753	66.836	9.8642
0.117796	67.126	11.8991				0.143122	67.126	14.6006				0.131773	67.126	15.7663				0.0964906	67.126	54.997				0.117497	67.126	29.3159				0.116255	67.126	9.7663
0.118307	67.417	11.7791				0.143742	67.417	14.8658				0.132345	67.417	16.6491				0.0969089	67.417	54.698				0.118006	67.417	29.4049				0.116759	67.417	9.6226
0.118818	67.708	11.8497				0.144363	67.708	15.2244				0.132916	67.708	18.4684				0.0973272	67.708	54.623				0.118515	67.708	30.4521				0.117263	67.708	9.5897
0.119327	67.998	11.6933				0.144981	67.998	15.6307				0.133485	67.998	20.326				0.0977441	67.998	54.247				0.119023	67.998	30.9479				0.117765	67.998	9.5687
0.119837	68.289	11.7378				0.145602	68.289	16.0672				0.134056	68.289	22.5918				0.0981624	68.289	53.562				0.119532	68.289	31.1106				0.118269	68.289	9.5683
0.120346	68.579	11.8288				0.14622	68.579	16.7081				0.134626	68.579	24.9752				0.0985792	68.579	52.997				0.12004	68.579	30.889				0.118771	68.579	9.7712
0.120857	68.87	12.2371				0.14684	68.87	17.2843				0.135197	68.87	26.8458				0.0989975	68.87	52.845				0.120549	68.87	31.2061				0.119275	68.87	9.7084
0.121367	69.161	12.7317				0.147461	69.161	18.0751				0.135768	69.161	28.5045				0.0994158	69.161	53.007				0.121059	69.161	30.7502				0.119779	69.161	9.8907
0.121876	69.451	13.8044				0.148079	69.451	18.5147				0.136337	69.451	29.8025				0.0998327	69.451	52.572				0.121566	69.451	30.6138				0.120281	69.451	9.9283
0.122387	69.742	14.9733				0.1487	69.742	18.4277				0.136909	69.742	30.9741				0.100251	69.742	51.668				0.122076	69.742	30.7357				0.120785	69.742	9.5463
0.122896	70.032	16.2084				0.149318	70.032	18.3633				0.137478	70.032	31.7055				0.100668	70.032	50.68				0.122583	70.032	30.7486				0.121288	70.032	9.458
0.123407	70.323	17.3451				0.149938	70.323	18.3466				0.138049	70.323	32.4888				0.101086	70.323	49.528				0.123093	70.323	30.5762				0.121792	70.323	9.284
0.123917	70.614	17.9511				0.150559	70.614	18.414				0.138621	70.614	32.903				0.101504	70.614	47.84				0.123602	70.614	30.0773				0.122296	70.614	9.3904
0.124426	70.904	17.9851				0.151177	70.904	18.2119				0.13919	70.904	33.3021				0.101921	70.904	46.35				0.12411	70.904	29.0561				0.122798	70.904	9.6779
0.124937	71.195	17.4829				0.151797	71.195	18.2839				0.139761	71.195	33.8553				0.10234	71.195	45.258				0.124619	71.195	28.3949				0.123302	71.195	9.5587
0.125446	71.485	16.7499				0.152416	71.485	18.2743				0.14033	71.485	35.1318				0.102756	71.485	44.285				0.125127	71.485	27.3397				0.123804	71.485	8.9622
0.125956	71.776	16.0862				0.153036	71.776	18.5935				0.140902	71.776	35.6396				0.103175	71.776	43.822				0.125636	71.776	26.358				0.124308	71.776	8.6137
0.126465	72.066	15.3428				0.153655	72.066	18.6261				0.141471	72.066	35.5993				0.103592	72.066	43.59				0.126144	72.066	26.1535				0.12481	72.066	8.3575
0.126976	72.357	14.938				0.154275	72.357	18.5666				0.142042	72.357	35.9746				0.10401	72.357	43.39				0.126653	72.357	25.5623				0.125314	72.357	8.2944
0.127487	72.648	14.5555				0.154895	72.648	18.8751				0.142613	72.648	37.3661				0.104428	72.648	43.31				0.127162	72.648	25.1756				0.125818	72.648	8.2807
0.127996	72.938	14.2159				0.155514	72.938	19.0668				0.143183	72.938	39.1294				0.104845	72.938	43.18				0.12767	72.938	24.5954				0.126321	72.938	8.2055
0.128506	73.229	13.9463				0.156134	73.229	19.2598				0.143754	73.229	41.22				0.105263	73.229	42.76				0.128179	73.229	24.8636				0.126825	73.229	8.0796
0.129015	73.519	13.7452				0.156753	73.519	19.116				0.144323	73.519	42.6284				0.10568	73.519	42.108				0.128687	73.519	26.0947				0.127327	73.519	8.0775
0.129526	73.81	13.6282				0.157373	73.81	19.3848				0.144895	73.81	44.0605				0.106099	73.81	41.527				0.129196	73.81	27.836				0.127831	73.81	8.2152
0.130036	74.101	13.3619				0.157993	74.101	19.2831				0.145466	74.101	44.0956				0.106517	74.101	41.438				0.129706	74.101	28.3696				0.128335	74.101	8.3364
0.130545	74.391	13.1037				0.158612	74.391	18.9328				0.146035	74.391	44.308				0.106934	74.391	41.432				0.130213	74.391	27.3968				0.128837	74.391	8.3857
0.131056	74.682	12.5865				0.159232	74.682	18.5383				0.146606	74.682	44.3793				0.107352	74.682	40.925				0.130723	74.682	25.9267				0.129341	74.682	8.4633
0.131565	74.972	12.3384				0.159851	74.972	18.0915				0.147176	74.972	45.928				0.107769	74.972	39.828				0.13123	74.972	24.5498				0.129843	74.972	8.5326
0.132076	75.263	12.304				0.160471	75.263	17.715				0.147747	75.263	47.672				0.108187	75.263	38.583				0.13174	75.263	23.9364				0.130347	75.263	8.7422
0.132586	75.554	12.1165				0.161091	75.554	17.4814				0.148318	75.554	48.0388				0.108605	75.554	37.308				0.132249	75.554	23.7014				0.130851	75.554	9.1055
0.133095	75.844	11.9888				0.16171	75.844	17.4935				0.148887	75.844	48.6188				0.109022	75.844	36.06				0.132757	75.844	23.9977				0.131353	75.844	9.253
0.133606	76.135	11.8887				0.16233	76.135	17.7847				0.149459	76.135	47.0292				0.109441	76.135	35.213				0.133266	76.135	23.9023				0.131857	76.135	9.138
0.134115	76.425	11.7029				0.162949	76.425	17.7513				0.150028	76.425	43.8107				0.109857	76.425	34.592				0.133774	76.425	23.8662				0.13236	76.425	9.0174
0.134625	76.716	11.7764				0.163569	76.716	17.5067				0.150599	76.716	41.2648				0.110276	76.716	33.677				0.134283	76.716	23.8902				0.132864	76.716	8.6965
0.135136	77.007	11.5589				0.164189	77.007	17.1229				0.15117	77.007	39.5662				0.110694	77.007	32.89				0.134792	77.007	24.1455				0.133368	77.007	8.4163
0.135645	77.297	11.2612				0.164808	77.297	16.4317				0.15174	77.297	38.2713				0.111111	77.297	32.55				0.1353	77.297	24.4028				0.13387	77.297	8.0523
0.136156	77.588	11.3655				0.165428	77.588	15.7088				0.152311	77.588	38.2326				0.111529	77.588	32.33				0.135809	77.588	23.8466				0.134374	77.588	7.842
0.136665	77.878	11.3738				0.166047	77.878	15.2157				0.15288	77.878	38.5624				0.111946	77.878	32.33				0.136317	77.878	23.4083				0.134876	77.878	7.6546
0.137175	78.169	11.3863				0.166667	78.169	14.6972				0.153452	78.169	39.0205				0.112364	78.169	32.288				0.136826	78.169	23.2593				0.13538	78.169	7.5528
0.137684	78.459	11.5833				0.167285	78.459	14.3447				0.154021	78.459	39.0743				0.112781	78.459	32.24				0.137334	78.459	23.1696				0.135882	78.459	7.4994
0.138195	78.75	11.8397				0.167906	78.75	14.3676				0.154592	78.75	39.5038				0.1132	78.75	32.398				0.137843	78.75	23.0914				0.136386	78.75	7.5809
0.138705	79.041	12.2535				0.168526	79.041	14.2315				0.155163	79.041	40.1546				0.113618	79.041	32.54				0.138353	79.041	23.1841				0.13689	79.041	7.5937
0.139214	79.331	12.6275				0.169145	79.331	14.1756				0.155733	79.331	39.9486				0.114035	79.331	32.573				0.13886	79.331	23.1392				0.137393	79.331	7.6215
0.139725	79.622	12.887				0.169765	79.622	14.1934				0.156304	79.622	38.5453				0.114453	79.622	32.855				0.13937	79.622	23.2634				0.137897	79.622	7.7613
0.140234	79.912	13.199				0.170383	79.912	14.5233				0.156873	79.912	36.674				0.11487	79.912	33.148				0.139877	79.912	23.7377				0.138399	79.912	7.7907
0.140745	80.203	13.0646				0.171004	80.203	15.0124				0.157444	80.203	35.8112				0.115288	80.203	33.332				0.140387	80.203	24.4896				0.138903	80.203	7.907
0.141255	80.494	12.7407				0.171624	80.494	15.517				0.158016	80.494	35.4189				0.115706	80.494	33.358				0.140896	80.494	24.8485				0.139407	80.494	7.9162
0.141764	80.784	12.2851				0.172243	80.784	15.8096				0.158585	80.784	35.0007				0.116123	80.784	33.058				0.141404	80.784	25.0123				0.139909	80.784	7.7775
0.142275	81.075	11.9203				0.172863	81.075	16.1028				0.159156	81.075	34.5845				0.116542	81.075	33.013				0.141913	81.075	24.6942				0.140413	81.075	7.5325
0.142784	81.365	11.5076				0.173481	81.365	16.6184				0.159726	81.365	33.5076				0.116959	81.365	33.01				0.142421	81.365	24.3925				0.140915	81.365	7.2845
0.143294	81.656	11.1307				0.174102	81.656	17.1995				0.160297	81.656	32.4471				0.117377	81.656	32.813				0.14293	81.656	24.043				0.141419	81.656	7.1027
0.143805	81.947	10.8558				0.174722	81.947	17.6321				0.160868	81.947	31.5257				0.117795	81.947	32.595				0.143439	81.947	23.614				0.141923	81.947	7.0756
0.144314	82.237	10.5201				0.175341	82.237	18.2496				0.161437	82.237	30.6912				0.118212	82.237	32.275				0.143947	82.237	23.652				0.142425	82.237	7.1475
0.144825	82.528	10.3014				0.175961	82.528	18.7568				0.162009	82.528	29.7899				0.11863	82.528	32.087				0.144456	82.528	23.5259				0.142929	82.528	7.0866
0.145333	82.818	10.2131				0.176579	82.818	19.262				0.162578	82.818	28.135				0.119047	82.818	31.772				0.144964	82.818	23.7275				0.143432	82.818	6.9089
0.145844	83.109	10.261				0.1772	83.109	19.4109				0.163149	83.109	26.5946				0.119465	83.109	31.288				0.145473	83.109	23.9947				0.143936	83.109	6.7785
0.146355	83.4	10.115				0.17782	83.4	19.0343				0.16372	83.4	24.9318				0.119884	83.4	30.663				0.145983	83.4	24.6484				0.14444	83.4	6.7473
0.146864	83.69	9.9092				0.178439	83.69	18.7129				0.16429	83.69	23.6153				0.120301	83.69	29.873				0.14649	83.69	25.8274				0.144942	83.69	6.8443
0.147374	83.981	9.8316				0.179059	83.981	18.6975				0.164861	83.981	23.1903				0.120719	83.981	29.335				0.147	83.981	27.7896				0.145446	83.981	7.0408
0.147883	84.271	9.8132				0.179677	84.271	18.4191				0.16543	84.271	22.7609				0.121136	84.271	29.243				0.147507	84.271	30.0304				0.145948	84.271	7.1217
0.148394	84.562	9.625				0.180298	84.562	18.612				0.166002	84.562	22.2707				0.121554	84.562	29.17				0.148017	84.562	33.2955				0.146452	84.562	7.2399
0.148903	84.852	9.4921				0.180916	84.852	18.1102				0.166571	84.852	21.915				0.121971	84.852	29.355				0.148524	84.852	37.1445				0.146954	84.852	7.2859
0.149414	85.143	9.4033				0.181537	85.143	17.5036				0.167142	85.143	21.7872				0.122389	85.143	29.423				0.149034	85.143	40.7005				0.147458	85.143	7.2514
0.149924	85.434	9.4002				0.182157	85.434	17.1265				0.167713	85.434	21.6129				0.122808	85.434	29.237				0.149543	85.434	42.6647				0.147962	85.434	7.0615
0.150433	85.724	9.3711				0.182775	85.724	16.886				0.168283	85.724	21.4587				0.123224	85.724	29.183				0.15005	85.724	44.0263				0.148465	85.724	6.9465
0.150944	86.015	9.333				0.183396	86.015	16.7816				0.168854	86.015	21.2604				0.123643	86.015	29.077				0.15056	86.015	43.9523				0.148968	86.015	7.0256
0.151453	86.305	9.2734				0.184014	86.305	16.6886				0.169423	86.305	21.2834				0.12406	86.305	29.15				0.151067	86.305	43.6803				0.149471	86.305	6.921
0.151963	86.596	9.3125				0.184635	86.596	16.4809				0.169994	86.596	21.5652				0.124478	86.596	29.45				0.151577	86.596	43.2633				0.149975	86.596	6.8487
0.152474	86.887	9.0593				0.185255	86.887	16.0095				0.170566	86.887	21.9481				0.124896	86.887	29.693				0.152086	86.887	42.5639				0.150479	86.887	6.9067
0.152983	87.177	9.2007				0.185873	87.177	15.5195				0.171135	87.177	22.3396				0.125313	87.177	29.702				0.152594	87.177	42.5169				0.150981	87.177	7.0337
0.153494	87.468	9.2743				0.186494	87.468	15.3054				0.171706	87.468	23.1816				0.125731	87.468	29.513				0.153103	87.468	42.3001				0.151485	87.468	7.161
0.154002	87.758	9.0166				0.187112	87.758	15.1726				0.172275	87.758	25.3635				0.126148	87.758	29.222				0.153611	87.758	42.4063				0.151987	87.758	7.3379
0.154513	88.049	9.0109				0.187733	88.049	15.0388				0.172847	88.049	27.586				0.126566	88.049	28.773				0.15412	88.049	41.916				0.152491	88.049	7.527
0.155024	88.34	8.8891				0.188353	88.34	15.2463				0.173418	88.34	30.1715				0.126985	88.34	28.272				0.15463	88.34	41.9059				0.152995	88.34	7.5124
0.155533	88.63	8.872				0.188971	88.63	15.2631				0.173987	88.63	31.8029				0.127402	88.63	27.892				0.155137	88.63	41.9235				0.153497	88.63	7.4046
0.156043	88.921	9.0546				0.189592	88.921	15.2145				0.174559	88.921	32.5874				0.12782	88.921	27.483				0.155646	88.921	42.7962				0.154001	88.921	7.3937
0.156552	89.211	9.2592				0.19021	89.211	15.1819				0.175128	89.211	33.0849				0.128237	89.211	27.188				0.156154	89.211	43.7785				0.154504	89.211	7.3986
0.157063	89.502	9.49				0.190831	89.502	15.1144				0.175699	89.502	32.8991				0.128655	89.502	26.942				0.156663	89.502	44.405				0.155008	89.502	7.2009
0.157574	89.793	9.8755				0.191451	89.793	15.0381				0.17627	89.793	31.7491				0.129073	89.793	26.733				0.157173	89.793	44.5685				0.155512	89.793	7.3897
0.158083	90.083	10.3389				0.192069	90.083	15.6669				0.17684	90.083	30.3751				0.12949	90.083	26.367				0.15768	90.083	44.5046				0.156014	90.083	7.6919
0.158593	90.374	10.8687				0.19269	90.374	16.1468				0.177411	90.374	29.352				0.129909	90.374	25.888				0.15819	90.374	44.1191				0.156518	90.374	7.7054
0.159102	90.664	11.5138				0.193308	90.664	16.3796				0.17798	90.664	28.4881				0.130325	90.664	25.743				0.158697	90.664	43.4192				0.15702	90.664	7.5377
0.159613	90.955	11.7657				0.193929	90.955	16.4305				0.178551	90.955	28.2722				0.130744	90.955	25.717				0.159207	90.955	43.3004				0.157524	90.955	7.2915
0.160122	91.245	11.8787				0.194547	91.245	16.0961				0.179121	91.245	28.3674				0.131161	91.245	25.515				0.159714	91.245	42.8703				0.158026	91.245	7.0536
0.160632	91.536	11.8255				0.195167	91.536	15.9188				0.179692	91.536	28.5647				0.131579	91.536	25.41				0.160224	91.536	42.4008				0.15853	91.536	6.9058
0.161143	91.827	11.6686				0.195788	91.827	15.5981				0.180263	91.827	28.5584				0.131997	91.827	25.548				0.160733	91.827	41.2084				0.159034	91.827	6.9825
0.161652	92.117	11.6207				0.196406	92.117	15.5045				0.180833	92.117	28.0187				0.132414	92.117	25.672				0.161241	92.117	40.0902				0.159536	92.117	7.0559
0.162163	92.408	11.9398				0.197027	92.408	15.2071				0.181404	92.408	28.4099				0.132832	92.408	25.788				0.16175	92.408	39.8242				0.16004	92.408	7.1164
0.162671	92.698	12.5141				0.197645	92.698	14.9281				0.181973	92.698	28.5674				0.133249	92.698	26.03				0.162258	92.698	39.0075				0.160543	92.698	7.0597
0.163182	92.989	12.7039				0.198265	92.989	14.7576				0.182544	92.989	28.7913				0.133667	92.989	26.123				0.162767	92.989	38.0233				0.161047	92.989	7.1747
0.163693	93.28	13.0532				0.198886	93.28	14.5249				0.183116	93.28	29.0928				0.134086	93.28	26.12				0.163276	93.28	37.3656				0.161551	93.28	7.286
0.164202	93.57	13.2098				0.199504	93.57	14.4086				0.183685	93.57	29.5753				0.134503	93.57	26.035				0.163784	93.57	36.4661				0.162053	93.57	7.5046
0.164712	93.861	13.1219				0.200125	93.861	14.2488				0.184256	93.861	29.8864				0.134921	93.861	25.842				0.164293	93.861	35.5787				0.162557	93.861	7.4723
0.165221	94.151	12.9353				0.200743	94.151	14.0554				0.184825	94.151	30.6527				0.135338	94.151	25.61				0.164801	94.151	34.9202				0.163059	94.151	7.6485
0.165732	94.442	12.8635				0.201363	94.442	13.8304				0.185397	94.442	31.8707				0.135756	94.442	25.205				0.16531	94.442	34.2449				0.163563	94.442	7.8126
0.166243	94.733	12.7933				0.201984	94.733	13.5216				0.185968	94.733	32.3702				0.136174	94.733	25.025				0.16582	94.733	33.6925				0.164067	94.733	7.7398
0.166751	95.023	12.7428				0.202602	95.023	13.2938				0.186537	95.023	32.9873				0.136591	95.023	24.892				0.166327	95.023	33.2233				0.164569	95.023	7.9732
0.167262	95.314	12.8305				0.203223	95.314	13.1096				0.187108	95.314	33.4205				0.13701	95.314	24.742				0.166837	95.314	33.054				0.165073	95.314	8.1926
0.167771	95.604	13.2784				0.203841	95.604	12.9639				0.187678	95.604	33.169				0.137426	95.604	24.933				0.167344	95.604	32.9731				0.165576	95.604	8.4792
0.168282	95.895	13.79				0.204461	95.895	12.7633				0.188249	95.895	32.5181				0.137845	95.895	25.195				0.167854	95.895	33.0711				0.16608	95.895	8.6993
0.168792	96.186	14.354				0.205082	96.186	12.6453				0.18882	96.186	31.0834				0.138263	96.186	25.422				0.168363	96.186	33.3506				0.166584	96.186	8.8028
0.169301	96.476	14.5538				0.2057	96.476	12.5383				0.18939	96.476	29.4244				0.13868	96.476	25.665				0.168871	96.476	33.3334				0.167086	96.476	9.0214
0.169812	96.767	14.887				0.206321	96.767	12.6097				0.189961	96.767	27.7114				0.139098	96.767	26.142				0.16938	96.767	33.3511				0.16759	96.767	9.0302
0.170321	97.057	15.0286				0.206939	97.057	13.0109				0.19053	97.057	25.475				0.139515	97.057	26.63				0.169888	97.057	33.3118				0.168092	97.057	8.8243
0.170832	97.348	14.9833				0.207559	97.348	13.1775				0.191101	97.348	23.8643				0.139933	97.348	27.063				0.170397	97.348	33.1903				0.168596	97.348	8.7985
0.17134	97.638	15.322				0.208178	97.638	13.2342				0.191671	97.638	22.1554				0.14035	97.638	27.862				0.170905	97.638	33.2608				0.169098	97.638	8.6582
0.171851	97.929	15.5083				0.208798	97.929	13.0354				0.192242	97.929	20.6123				0.140769	97.929	28.785				0.171414	97.929	33.0186				0.169602	97.929	8.7253
0.172362	98.22	15.6056				0.209419	98.22	13.037				0.192813	98.22	19.1079				0.141187	98.22	29.078				0.171923	98.22	32.6128				0.170106	98.22	9.096
0.172871	98.51	15.9268				0.210037	98.51	13.0247				0.193382	98.51	18.1798				0.141604	98.51	28.677				0.172431	98.51	32.4507				0.170608	98.51	9.444
0.173381	98.801	16.202				0.210657	98.801	12.8843				0.193954	98.801	17.296				0.142022	98.801	28.278				0.17294	98.801	32.2223				0.171112	98.801	9.6489
0.17389	99.091	16.5706				0.211276	99.091	12.7997				0.194523	99.091	16.6609				0.142439	99.091	28.295				0.173448	99.091	31.8336				0.171615	99.091	9.7247
0.174401	99.382	16.8775				0.211896	99.382	12.8366				0.195094	99.382	16.0338				0.142857	99.382	28.633				0.173957	99.382	31.8128				0.172119	99.382	9.4515
0.174912	99.673	16.8262				0.212516	99.673	12.8827				0.195666	99.673	15.8393				0.143275	99.673	28.983				0.174467	99.673	31.8111				0.172623	99.673	9.218
0.17542	99.963	16.7886				0.213135	99.963	12.9532				0.196235	99.963	15.8825				0.143692	99.963	29.252				0.174974	99.963	32.3261				0.173125	99.963	9.1388
0.175931	100.254	16.5241				0.213755	100.254	13.2541				0.196806	100.254	16.0741				0.144111	100.254	29.547				0.175484	100.254	32.3435				0.173629	100.254	9.0149
0.17644	100.544	16.3251				0.214374	100.544	13.759				0.197375	100.544	16.3715				0.144527	100.544	29.788				0.175991	100.544	32.0979				0.174131	100.544	8.938
0.176951	100.835	16.5332				0.214994	100.835	13.8597				0.197947	100.835	16.6715				0.144946	100.835	30.042				0.176501	100.835	31.917				0.174635	100.835	9.0571
0.177461	101.126	16.6954				0.215614	101.126	14.0916				0.198518	101.126	16.5239				0.145364	101.126	30.237				0.17701	101.126	31.5916				0.175139	101.126	9.2408
0.17797	101.416	17.1112				0.216233	101.416	14.0432				0.199087	101.416	16.1618				0.145781	101.416	29.82				0.177518	101.416	31.4636				0.175641	101.416	9.5168
0.178481	101.707	17.2356				0.216853	101.707	14.0604				0.199658	101.707	15.9856				0.146199	101.707	29.435				0.178027	101.707	30.972				0.176145	101.707	9.6853
0.17899	101.997	17.86				0.217472	101.997	14.0594				0.200228	101.997	15.5717				0.146616	101.997	29.288				0.178535	101.997	31.0702				0.176648	101.997	9.2772
0.1795	102.288	17.8818				0.218092	102.288	14.035				0.200799	102.288	15.1926				0.147034	102.288	29.173				0.179044	102.288	30.6327				0.177152	102.288	8.8918
0.180011	102.579	17.8942				0.218712	102.579	14.1353				0.20137	102.579	14.9805				0.147453	102.579	29.423				0.179553	102.579	30.5671				0.177656	102.579	8.9479
0.18052	102.869	18.1832				0.219331	102.869	13.7944				0.20194	102.869	14.8484				0.14787	102.869	29.725				0.180061	102.869	30.2877				0.178158	102.869	8.9321
0.181031	103.16	18.3849				0.219951	103.16	13.1589				0.202511	103.16	14.6444				0.148288	103.16	30.058				0.18057	103.16	30.277				0.178662	103.16	8.8496
0.18154	103.45	18.2935				0.22057	103.45	12.6277				0.20308	103.45	14.7125				0.148705	103.45	30.688				0.181078	103.45	30.0847				0.179164	103.45	8.9678
0.18205	103.741	18.4449				0.22119	103.741	12.553				0.203651	103.741	14.8776				0.149123	103.741	31.358				0.181587	103.741	29.5842				0.179668	103.741	8.9628
0.182559	104.031	18.2712				0.221808	104.031	12.531				0.204221	104.031	15.2731				0.14954	104.031	31.937				0.182095	104.031	28.9757				0.18017	104.031	8.8631
0.18307	104.322	18.3694				0.222429	104.322	12.5297				0.204792	104.322	16.0604				0.149958	104.322	32.435				0.182604	104.322	29.0014				0.180674	104.322	8.3736
0.183581	104.613	17.9538				0.223049	104.613	12.6717				0.205363	104.613	16.849				0.150376	104.613	32.493				0.183114	104.613	28.5596				0.181178	104.613	8.196
0.184089	104.903	17.5113				0.223668	104.903	12.9233				0.205932	104.903	17.7257				0.150793	104.903	32.342				0.183621	104.903	27.6124				0.18168	104.903	8.0155
0.1846	105.194	17.3047				0.224288	105.194	13.1494				0.206504	105.194	18.5196				0.151212	105.194	32.257				0.184131	105.194	26.3501				0.182184	105.194	7.9661
0.185109	105.484	16.8947				0.224906	105.484	13.6066				0.207073	105.484	19.4087				0.151628	105.484	31.838				0.184638	105.484	25.7199				0.182687	105.484	7.7994
0.18562	105.775	16.3113				0.225527	105.775	14.3238				0.207644	105.775	19.9703				0.152047	105.775	31.538				0.185148	105.775	25.4768				0.183191	105.775	7.768
0.18613	106.066	15.8531				0.226147	106.066	15.0684				0.208215	106.066	20.051				0.152465	106.066	31.595				0.185657	106.066	25.4633				0.183695	106.066	8.0511
0.186639	106.356	15.5228				0.226766	106.356	14.9504				0.208785	106.356	20.045				0.152882	106.356	31.52				0.186165	106.356	25.2384				0.184197	106.356	8.4647
0.18715	106.647	14.7601				0.227386	106.647	14.4426				0.209356	106.647	19.7722				0.1533	106.647	31.067				0.186674	106.647	24.8217				0.184701	106.647	8.8412
0.187659	106.937	14.3271				0.228004	106.937	13.4199				0.209925	106.937	19.2997				0.153717	106.937	30.247				0.187182	106.937	24.4927				0.185203	106.937	9.3593
0.188169	107.228	14.0732				0.228625	107.228	12.4719				0.210497	107.228	19.0757				0.154135	107.228	29.623				0.187691	107.228	24.6391				0.185707	107.228	9.624
0.18868	107.519	13.754				0.229245	107.519	11.7782				0.211068	107.519	18.2252				0.154554	107.519	28.99				0.1882	107.519	24.764				0.186211	107.519	9.6697
0.189189	107.809	13.4898				0.229864	107.809	11.2005				0.211637	107.809	17.5583				0.154971	107.809	28.487				0.188708	107.809	25.0748				0.186713	107.809	9.5089
0.1897	108.1	13.2037				0.230484	108.1	11.0212				0.212208	108.1	17.0242				0.155389	108.1	28.212				0.189217	108.1	25.3558				0.187217	108.1	9.4234
0.190209	108.39	13.0756				0.231102	108.39	10.8658				0.212778	108.39	16.6296				0.155806	108.39	27.95				0.189725	108.39	25.9176				0.18772	108.39	9.4839
0.190719	108.681	12.8557				0.231723	108.681	10.7942				0.213349	108.681	16.0216				0.156224	108.681	28.163				0.190234	108.681	26.0386				0.188223	108.681	9.1703
0.19123	108.972	12.7253				0.232343	108.972	10.8617				0.21392	108.972	15.6902				0.156642	108.972	28.55				0.190744	108.972	26.5966				0.188727	108.972	8.819
0.191739	109.262	12.3937				0.232962	109.262	10.9384				0.214489	109.262	15.5161				0.157059	109.262	28.963				0.191251	109.262	27.363				0.18923	109.262	8.8108
0.19225	109.553	12.1649				0.233582	109.553	11.03				0.215061	109.553	15.2764				0.157477	109.553	29.492				0.191761	109.553	28.0572				0.189734	109.553	8.6173
0.192758	109.843	12.1412				0.2342	109.843	11.0685				0.21563	109.843	14.9954				0.157894	109.843	30.012				0.192268	109.843	28.2924				0.190236	109.843	8.734
0.193269	110.134	11.8722				0.234821	110.134	11.0762				0.216201	110.134	15.1079				0.158313	110.134	30.398				0.192778	110.134	28.7559				0.19074	110.134	8.3479
0.193778	110.424	11.7239				0.235439	110.424	11.136				0.216771	110.424	15.1776				0.15873	110.424	30.553				0.193285	110.424	29.0424				0.191242	110.424	8.1308
0.194289	110.715	11.4888				0.23606	110.715	11.318				0.217342	110.715	15.2085				0.159148	110.715	30.717				0.193795	110.715	29.4968				0.191746	110.715	8.0771
0.194799	111.006	11.1388				0.23668	111.006	11.5717				0.217913	111.006	15.2593				0.159566	111.006	30.51				0.194304	111.006	29.2956				0.19225	111.006	8.26
0.195308	111.296	11.1191				0.237298	111.296	11.562				0.218482	111.296	15.4685				0.159983	111.296	30.08				0.194811	111.296	29.1385				0.192752	111.296	8.4634
0.195819	111.587	11.2103				0.237919	111.587	11.8803				0.219054	111.587	15.0906				0.160401	111.587	29.952				0.195321	111.587	29.1596				0.193256	111.587	8.7892
0.196328	111.877	11.2869				0.238537	111.877	12.1207				0.219623	111.877	14.3414				0.160818	111.877	29.835				0.195828	111.877	28.9096				0.193759	111.877	9.1798
0.196838	112.168	11.5256				0.239158	112.168	12.5828				0.220194	112.168	13.8583				0.161236	112.168	30.182				0.196338	112.168	28.814				0.194263	112.168	9.664
0.197349	112.459	12.0297				0.239778	112.459	13.4141				0.220765	112.459	13.5462				0.161655	112.459	30.425				0.196847	112.459	28.6507				0.194767	112.459	10.3308
0.197858	112.749	12.5739				0.240396	112.749	14.105				0.221335	112.749	13.7868				0.162072	112.749	30.408				0.197355	112.749	28.3814				0.195269	112.749	10.9675
0.198369	113.04	13.0277				0.241017	113.04	15.4787				0.221906	113.04	13.9099				0.16249	113.04	30.772				0.197864	113.04	28.6512				0.195773	113.04	11.5297
0.198878	113.33	13.5064				0.241635	113.33	16.4278				0.222475	113.33	14.1692				0.162907	113.33	31.388				0.198372	113.33	28.8701				0.196275	113.33	12.2451
0.199388	113.621	13.7499				0.242256	113.621	16.7078				0.223046	113.621	14.2604				0.163325	113.621	31.998				0.198881	113.621	29.7777				0.196779	113.621	13.4467
0.199899	113.912	14.0087				0.242876	113.912	17.0925				0.223618	113.912	14.1757				0.163743	113.912	32.598				0.199391	113.912	29.9949				0.197283	113.912	14.9938
0.200408	114.202	14.3629				0.243494	114.202	17.0014				0.224187	114.202	14.2883				0.16416	114.202	33.58				0.199898	114.202	29.5406				0.197785	114.202	15.7292
0.200918	114.493	14.7981				0.244115	114.493	16.936				0.224758	114.493	14.1553				0.164579	114.493	34.65				0.200407	114.493	29.2966				0.198289	114.493	16.4279
0.201427	114.783	15.2322				0.244733	114.783	17.002				0.225328	114.783	14.1026				0.164995	114.783	35.782				0.200915	114.783	29.1892				0.198791	114.783	16.8878
0.201938	115.074	15.4829				0.245354	115.074	16.9838				0.225899	115.074	14.0112				0.165414	115.074	37.2				0.201424	115.074	29.5229				0.199295	115.074	17.0519
0.202447	115.364	15.6196				0.245972	115.364	17.1459				0.226468	115.364	14.3322				0.165831	115.364	38.455				0.201932	115.364	30.0844				0.199798	115.364	17.2244
0.202958	115.655	15.5161				0.246592	115.655	16.9827				0.227039	115.655	14.6451				0.166249	115.655	39.423				0.202441	115.655	30.3945				0.200302	115.655	16.7982
0.203468	115.946	15.5266				0.247213	115.946	16.7576				0.227611	115.946	14.7617				0.166667	115.946	40.32				0.202951	115.946	30.884				0.200806	115.946	16.1041
0.203977	116.236	15.7241				0.247831	116.236	15.8943				0.22818	116.236	14.801				0.167084	116.236	40.987				0.203458	116.236	31.5485				0.201308	116.236	15.6405
0.204488	116.527	15.7723				0.248452	116.527	15.2586				0.228751	116.527	14.6488				0.167502	116.527	41.818				0.203968	116.527	32.0459				0.201812	116.527	14.848
0.204997	116.817	15.7436				0.24907	116.817	14.4568				0.22932	116.817	14.2944				0.167919	116.817	42.927				0.204475	116.817	32.1236				0.202314	116.817	14.0276
0.205507	117.108	15.7114				0.24969	117.108	13.8955				0.229892	117.108	14.0136				0.168337	117.108	43.713				0.204985	117.108	32.2571				0.202818	117.108	13.2448
0.206018	117.399	15.974				0.250311	117.399	13.7056				0.230463	117.399	13.461				0.168756	117.399	44.348				0.205494	117.399	32.8014				0.203322	117.399	12.2446
0.206527	117.689	15.7398				0.250929	117.689	13.7529				0.231032	117.689	12.7947				0.169173	117.689	45.562				0.206002	117.689	33.2958				0.203824	117.689	11.5234
0.207038	117.98	15.3635				0.25155	117.98	13.5064				0.231604	117.98	12.1796				0.169591	117.98	46.407				0.206511	117.98	34.1546				0.204328	117.98	10.8364
0.207547	118.27	14.8687				0.252168	118.27	13.4132				0.232173	118.27	11.4382				0.170008	118.27	46.133				0.207019	118.27	34.8815				0.204831	118.27	10.3384
0.208057	118.561	14.3319				0.252788	118.561	13.5483				0.232744	118.561	11.1125				0.170426	118.561	45.443				0.207528	118.561	35.2187				0.205335	118.561	9.806
0.208568	118.852	13.5128				0.253409	118.852	13.9183				0.233315	118.852	10.5912				0.170844	118.852	44.218				0.208037	118.852	34.9258				0.205839	118.852	9.6743
0.209077	119.142	12.559				0.254027	119.142	14.159				0.233885	119.142	10.2794				0.171261	119.142	42.903				0.208545	119.142	34.1663				0.206341	119.142	9.8365
0.209587	119.433	12.0576				0.254648	119.433	14.4916				0.234456	119.433	10.1901				0.17168	119.433	42.418				0.209054	119.433	33.0096				0.206845	119.433	9.7141
0.210096	119.723	11.7284				0.255266	119.723	14.6886				0.235025	119.723	10.2247				0.172096	119.723	42.248				0.209562	119.723	32.115				0.207347	119.723	9.6562
0.210607	120.014	11.5602				0.255886	120.014	14.9967				0.235596	120.014	10.2819				0.172515	120.014	41.92				0.210071	120.014	31.6308				0.207851	120.014	9.3891
0.211118	120.305	11.3239				0.256507	120.305	15.1022				0.236168	120.305	10.3152				0.172933	120.305	41.295				0.210581	120.305	32.1683				0.208355	120.305	9.1027
0.211627	120.595	11.2935				0.257125	120.595	14.9872				0.236737	120.595	10.2933				0.17335	120.595	40.22				0.211088	120.595	32.4281				0.208857	120.595	8.9675
0.212137	120.886	11.18				0.257746	120.886	15.1299				0.237308	120.886	10.1296				0.173768	120.886	38.927				0.211598	120.886	32.7674				0.209361	120.886	8.8967
0.212646	121.176	11.4206				0.258364	121.176	15.7237				0.237878	121.176	10.2195				0.174185	121.176	37.87				0.212105	121.176	33.1658				0.209863	121.176	8.5445
0.213157	121.467	11.5725				0.258984	121.467	16.2807				0.238449	121.467	10.1855				0.174603	121.467	37.097				0.212615	121.467	32.8073				0.210367	121.467	8.3901
0.213666	121.757	11.5685				0.259603	121.757	16.5754				0.239018	121.757	10.2499				0.17502	121.757	36.447				0.213122	121.757	32.5421				0.21087	121.757	8.2175
0.214176	122.048	11.7501				0.260223	122.048	17.0596				0.239589	122.048	10.2348				0.175438	122.048	36.087				0.213632	122.048	32.3613				0.211374	122.048	8.0893
0.214687	122.339	11.6521				0.260844	122.339	16.9951				0.240161	122.339	10.0526				0.175857	122.339	36.445				0.214141	122.339	32.2577				0.211878	122.339	8.1737
0.215196	122.629	11.4315				0.261462	122.629	16.746				0.24073	122.629	10.0154				0.176274	122.629	36.895				0.214649	122.629	32.1192				0.21238	122.629	8.0919
0.215707	122.92	11.2178				0.262082	122.92	16.5333				0.241301	122.92	9.802				0.176692	122.92	37.077				0.215158	122.92	31.9054				0.212884	122.92	8.04
0.216216	123.21	10.7898				0.262701	123.21	16.3049				0.24187	123.21	9.661				0.177109	123.21	37.282				0.215666	123.21	31.4511				0.213386	123.21	8.2097
0.216726	123.501	10.3486				0.263321	123.501	16.0321				0.242442	123.501	9.7346				0.177527	123.501	37.12				0.216175	123.501	30.6455				0.21389	123.501	7.949
0.217237	123.792	9.416				0.263942	123.792	15.4015				0.243013	123.792	9.6291				0.177945	123.792	37.047				0.216684	123.792	29.9309				0.214394	123.792	8.0502
0.217746	124.082	8.9179				0.26456	124.082	14.8009				0.243582	124.082	9.5851				0.178362	124.082	37.392				0.217192	124.082	29.9263				0.214896	124.082	8.1635
0.218256	124.373	8.5113				0.26518	124.373	14.3296				0.244153	124.373	9.4226				0.178781	124.373	37.552				0.217701	124.373	29.5194				0.2154	124.373	8.3385
0.218765	124.663	8.4295				0.265799	124.663	13.4056				0.244723	124.663	9.4247				0.179197	124.663	37.975				0.218209	124.663	29.5077				0.215903	124.663	8.5689
0.219276	124.954	8.4286				0.266419	124.954	12.5351				0.245294	124.954	9.6228				0.179616	124.954	38.863				0.218718	124.954	29.3736				0.216407	124.954	8.9531
0.219787	125.245	8.3083				0.26704	125.245	11.6759				0.245865	125.245	9.9331				0.180034	125.245	39.087				0.219228	125.245	29.1445				0.216911	125.245	9.0861
0.220296	125.535	8.2747				0.267658	125.535	11.1748				0.246435	125.535	10.7154				0.180451	125.535	38.937				0.219735	125.535	28.9821				0.217413	125.535	9.0733
0.220806	125.826	8.4725				0.268278	125.826	10.852				0.247006	125.826	11.704				0.180869	125.826	39.075				0.220245	125.826	28.7647				0.217917	125.826	8.8782
0.221315	126.116	8.5317				0.268897	126.116	10.6762				0.247575	126.116	12.4676				0.181286	126.116	38.918				0.220752	126.116	28.5424				0.218419	126.116	8.6924
0.221826	126.407	8.6216				0.269517	126.407	10.7936				0.248146	126.407	13.1677				0.181704	126.407	38.722				0.221262	126.407	28.3655				0.218923	126.407	8.5089
0.222336	126.698	8.609				0.270138	126.698	11.0977				0.248718	126.698	13.4135				0.182123	126.698	38.307				0.221771	126.698	28.6176				0.219427	126.698	8.302
0.222845	126.988	8.6116				0.270756	126.988	11.1646				0.249287	126.988	13.2589				0.18254	126.988	37.165				0.222279	126.988	29.5237				0.219929	126.988	8.4764
0.223356	127.279	8.5227				0.271376	127.279	11.0895				0.249858	127.279	13.2727				0.182958	127.279	36.078				0.222788	127.279	29.9997				0.220433	127.279	8.7532
0.223865	127.569	8.5458				0.271995	127.569	11.0167				0.250427	127.569	13.2677				0.183375	127.569	35.473				0.223296	127.569	29.7347				0.220935	127.569	9.011
0.224376	127.86	8.5643				0.272615	127.86	10.9121				0.250999	127.86	13.3989				0.183793	127.86	34.812				0.223805	127.86	28.7327				0.221439	127.86	9.4406
0.224885	128.15	8.6725				0.273233	128.15	10.7379				0.251568	128.15	13.7402				0.18421	128.15	33.87				0.224313	128.15	27.9857				0.221942	128.15	9.5904
0.225395	128.441	8.6146				0.273854	128.441	10.3333				0.252139	128.441	14.2565				0.184628	128.441	33.052				0.224822	128.441	27.1649				0.222446	128.441	9.8225
0.225906	128.732	8.3387				0.274474	128.732	10.1796				0.252711	128.732	14.5178				0.185046	128.732	32.248				0.225331	128.732	27.51				0.22295	128.732	9.7981
0.226415	129.022	8.1853				0.275093	129.022	9.7384				0.25328	129.022	15.2311				0.185463	129.022	31.51				0.225839	129.022	27.8434				0.223452	129.022	9.9701
0.226925	129.313	7.9986				0.275713	129.313	9.0633				0.253851	129.313	15.8261				0.185882	129.313	30.823				0.226348	129.313	27.9057				0.223956	129.313	10.3282
0.227434	129.603	7.6041				0.276331	129.603	8.451				0.25442	129.603	16.8388				0.186298	129.603	29.942				0.226856	129.603	28.3975				0.224458	129.603	10.3258
0.227945	129.894	7.3679				0.276952	129.894	7.9068				0.254992	129.894	17.8272				0.186717	129.894	29.353				0.227365	129.894	28.3686				0.224962	129.894	10.2959
0.228456	130.185	7.3335				0.277572	130.185	7.4596				0.255563	130.185	18.6421				0.187135	130.185	28.853				0.227875	130.185	28.308				0.225466	130.185	10.1335
0.228965	130.475	7.275				0.278191	130.475	7.1366				0.256132	130.475	19.6011				0.187552	130.475	28.252				0.228382	130.475	28.0562				0.225968	130.475	10.0202
0.229475	130.766	7.1217				0.278811	130.766	6.9963				0.256703	130.766	20.6681				0.18797	130.766	27.928				0.228892	130.766	27.5786				0.226472	130.766	9.952
0.229984	131.056	6.9954				0.279429	131.056	6.6376				0.257273	131.056	21.8297				0.188387	131.056	27.593				0.229399	131.056	27.443				0.226975	131.056	10.0088
0.230495	131.347	6.9819				0.28005	131.347	6.5435				0.257844	131.347	21.0283				0.188805	131.347	27.12				0.229909	131.347	27.3843				0.227479	131.347	9.7105
0.231005	131.638	6.9441				0.28067	131.638	6.4887				0.258415	131.638	18.9561				0.189224	131.638	26.4				0.230418	131.638	27.6096				0.227982	131.638	9.4356
0.231514	131.928	6.9821				0.281289	131.928	6.6328				0.258985	131.928	17.0912				0.189641	131.928	25.937				0.230926	131.928	27.9269				0.228485	131.928	9.3255
0.232025	132.219	7.064				0.281909	132.219	6.685				0.259556	132.219	15.3069				0.190059	132.219	25.512				0.231435	132.219	28.0781				0.228989	132.219	9.3476
0.232534	132.509	7.2157				0.282527	132.509	6.7901				0.260125	132.509	13.7617				0.190476	132.509	25.282				0.231943	132.509	27.8945				0.229491	132.509	9.3981
0.233045	132.8	7.3576				0.283148	132.8	6.8884				0.260696	132.8	12.833				0.190894	132.8	25.258				0.232452	132.8	27.5006				0.229995	132.8	9.4412
0.233555	133.091	7.4509				0.283768	133.091	7.2732				0.261268	133.091	12.1874				0.191312	133.091	25.025				0.232961	133.091	27.2898				0.230499	133.091	9.5347
0.234064	133.381	7.4482				0.284387	133.381	7.5796				0.261837	133.381	11.7528				0.191729	133.381	24.857				0.233469	133.381	26.8043				0.231001	133.381	9.4922
0.234575	133.672	7.4697				0.285007	133.672	8.2595				0.262408	133.672	11.3448				0.192147	133.672	24.63				0.233978	133.672	26.6201				0.231505	133.672	9.5171
0.235084	133.962	7.7033				0.285625	133.962	9.1395				0.262977	133.962	10.9416				0.192564	133.962	24.303				0.234486	133.962	26.5988				0.232007	133.962	9.4454
0.235594	134.253	7.6576				0.286246	134.253	10.3084				0.263549	134.253	10.3592				0.192983	134.253	24.142				0.234995	134.253	26.968				0.232511	134.253	9.5023
0.236103	134.543	7.5565				0.286864	134.543	11.4909				0.264118	134.543	10.4033				0.193399	134.543	24.293				0.235503	134.543	27.1167				0.233014	134.543	9.4479
0.236614	134.834	7.4317				0.287485	134.834	11.9227				0.264689	134.834	10.4762				0.193818	134.834	24.187				0.236012	134.834	27.6474				0.233518	134.834	9.3935
0.237125	135.125	7.3657				0.288105	135.125	11.9325				0.26526	135.125	10.4534				0.194236	135.125	24.067				0.236522	135.125	27.7257				0.234022	135.125	9.063
0.237634	135.415	7.3312				0.288723	135.415	11.26				0.26583	135.415	10.4835				0.194653	135.415	24.258				0.237029	135.415	27.2712				0.234524	135.415	8.8019
0.238144	135.706	7.2207				0.289344	135.706	10.5168				0.266401	135.706	10.4616				0.195071	135.706	24.688				0.237539	135.706	26.426				0.235028	135.706	8.6744
0.238653	135.996	7.2314				0.289962	135.996	9.8331				0.26697	135.996	10.2995				0.195488	135.996	25.47				0.238046	135.996	25.8833				0.23553	135.996	8.4759
0.239164	136.287	7.3666				0.290583	136.287	9.1773				0.267542	136.287	10.3138				0.195906	136.287	26.328				0.238556	136.287	25.4134				0.236034	136.287	8.3958
0.239674	136.578	7.3963				0.291203	136.578	8.6519				0.268113	136.578	10.4372				0.196325	136.578	27.185				0.239065	136.578	25.1124				0.236538	136.578	8.1135
0.240183	136.868	7.4042				0.291821	136.868	8.1503				0.268682	136.868	10.454				0.196742	136.868	27.873				0.239572	136.868	24.7272				0.23704	136.868	8.1064
0.240694	137.159	7.3227				0.292442	137.159	7.759				0.269253	137.159	10.7583				0.19716	137.159	28.252				0.240082	137.159	24.3462				0.237544	137.159	7.8847
0.241203	137.449	7.194				0.29306	137.449	7.6704				0.269823	137.449	10.8634				0.197577	137.449	28.415				0.240589	137.449	24.2299				0.238046	137.449	7.5314
0.241714	137.74	7.0996				0.293681	137.74	7.5597				0.270394	137.74	11.1215				0.197995	137.74	28.428				0.241099	137.74	24.3675				0.23855	137.74	7.4614
0.242224	138.031	7.1167				0.294301	138.031	7.4449				0.270965	138.031	11.2528				0.198413	138.031	27.797				0.241608	138.031	23.7842				0.239054	138.031	7.4066
0.242733	138.321	7.006				0.294919	138.321	7.2168				0.271534	138.321	11.4284				0.19883	138.321	26.495				0.242116	138.321	23.4637				0.239557	138.321	7.2128
0.243244	138.612	6.6761				0.29554	138.612	7.2291				0.272106	138.612	11.7801				0.199248	138.612	25.238				0.242625	138.612	23.6961				0.240061	138.612	6.9739
0.243753	138.902	6.4031				0.296158	138.902	6.9396				0.272675	138.902	12.4182				0.199665	138.902	24.35				0.243133	138.902	23.4478				0.240563	138.902	6.7579
0.244263	139.193	6.1337				0.296779	139.193	6.7607				0.273246	139.193	12.5956				0.200084	139.193	23.725				0.243642	139.193	23.4549				0.241067	139.193	6.6021
0.244774	139.484	5.7418				0.297399	139.484	6.7668				0.273817	139.484	12.7879				0.200502	139.484	23.548				0.244152	139.484	23.1431				0.241571	139.484	6.6466
0.245283	139.774	5.5455				0.298017	139.774	6.9325				0.274387	139.774	13.2367				0.200919	139.774	23.588				0.244659	139.774	22.8044				0.242073	139.774	6.5879
0.245794	140.065	5.4867				0.298638	140.065	7.0753				0.274958	140.065	13.0555				0.201337	140.065	23.18				0.245168	140.065	22.8246				0.242577	140.065	6.4673
0.246303	140.355	5.4226				0.299256	140.355	7.306				0.275527	140.355	13.1583				0.201754	140.355	22.822				0.245676	140.355	23.2412				0.243079	140.355	6.5086
0.246813	140.646	5.3018				0.299877	140.646	7.5886				0.276099	140.646	12.876				0.202172	140.646	22.845				0.246185	140.646	23.1003				0.243583	140.646	6.6923
0.247322	140.936	5.2635				0.300495	140.936	7.685				0.276668	140.936	12.6316				0.202589	140.936	23.028				0.246693	140.936	22.9946				0.244086	140.936	6.8453
0.247833	141.227	5.2825				0.301115	141.227	7.7087				0.277239	141.227	12.2158				0.203007	141.227	23.01				0.247202	141.227	23.1576				0.24459	141.227	6.7891
0.248343	141.518	5.2073				0.301736	141.518	7.7969				0.27781	141.518	11.8963				0.203426	141.518	23.377				0.247712	141.518	23.4104				0.245094	141.518	6.8369
0.248852	141.808	5.0843				0.302354	141.808	7.8422				0.27838	141.808	11.2758				0.203843	141.808	23.742				0.248219	141.808	23.5238				0.245596	141.808	6.7719
0.249363	142.099	4.9903				0.302975	142.099	8.2007				0.278951	142.099	10.7996				0.204261	142.099	23.768				0.248729	142.099	22.8083				0.2461	142.099	6.6359
0.249872	142.389	4.8856				0.303593	142.389	8.5002				0.27952	142.389	10.5808				0.204678	142.389	23.863				0.249236	142.389	22.5111				0.246602	142.389	6.5405
0.250383	142.68	4.8521				0.304213	142.68	8.8224				0.280091	142.68	10.3157				0.205096	142.68	23.713				0.249746	142.68	22.3396				0.247106	142.68	6.215
0.250893	142.971	4.8097				0.304834	142.971	9.2631				0.280663	142.971	10.0342				0.205514	142.971	23.457				0.250255	142.971	22.3565				0.24761	142.971	6.1639
0.251402	143.261	4.8091				0.305452	143.261	9.7959				0.281232	143.261	9.9574				0.205931	143.261	22.953				0.250763	143.261	22.4826				0.248112	143.261	6.1557
0.251913	143.552	4.8338				0.306073	143.552	10.2499				0.281803	143.552	9.989				0.20635	143.552	22.3				0.251272	143.552	22.698				0.248616	143.552	6.0906
0.252422	143.842	4.9367				0.306691	143.842	10.3858				0.282373	143.842	10.1346				0.206766	143.842	21.827				0.25178	143.842	22.82				0.249118	143.842	5.9971
0.252932	144.133	4.8067				0.307311	144.133	10.3115				0.282944	144.133	10.192				0.207185	144.133	21.233				0.252289	144.133	23.1425				0.249622	144.133	5.8632
0.253443	144.424	4.7727				0.307932	144.424	9.9899				0.283515	144.424	10.2606				0.207603	144.424	20.403				0.252798	144.424	23.4676				0.250126	144.424	5.8636
0.253952	144.714	4.833				0.30855	144.714	9.7311				0.284084	144.714	10.4667				0.20802	144.714	19.55				0.253306	144.714	23.5508				0.250629	144.714	5.9057
0.254463	145.005	4.7623				0.309171	145.005	9.5578				0.284656	145.005	10.6638				0.208438	145.005	18.823				0.253815	145.005	23.7732				0.251133	145.005	6.003
0.254972	145.295	4.7875				0.309789	145.295	9.5592				0.285225	145.295	11.1896				0.208855	145.295	18.428				0.254323	145.295	23.8688				0.251635	145.295	6.2443
0.255482	145.586	4.7746				0.310409	145.586	9.5248				0.285796	145.586	11.682				0.209273	145.586	18.373				0.254832	145.586	23.7489				0.252139	145.586	6.4041
0.255993	145.877	4.8084				0.31103	145.877	9.2584				0.286367	145.877	12.1173				0.209692	145.877	18.595				0.255342	145.877	23.9422				0.252643	145.877	6.4798
0.256502	146.167	4.759				0.311648	146.167	8.8228				0.286937	146.167	12.8312				0.210108	146.167	19.047				0.255849	146.167	23.981				0.253145	146.167	6.5778
0.257012	146.458	4.6656				0.312269	146.458	8.1667				0.287508	146.458	13.3815				0.210527	146.458	19.59				0.256359	146.458	24.4739				0.253649	146.458	6.8408
0.257521	146.748	4.696				0.312887	146.748	7.8894				0.288077	146.748	13.8902				0.210944	146.748	20.365				0.256866	146.748	24.7361				0.254151	146.748	6.9761
0.258032	147.039	4.6872				0.313507	147.039	7.8171				0.288649	147.039	14.6672				0.211362	147.039	20.953				0.257376	147.039	25.0282				0.254655	147.039	6.901
0.258541	147.329	4.5715				0.314126	147.329	7.7688				0.289218	147.329	15.2049				0.211779	147.329	21.337				0.257883	147.329	25.5782				0.255158	147.329	6.8691
0.259052	147.62	4.6083				0.314746	147.62	7.6406				0.289789	147.62	16.1123				0.212197	147.62	21.752				0.258393	147.62	26.0566				0.255662	147.62	6.8241
0.259562	147.911	4.4926				0.315367	147.911	7.7695				0.29036	147.911	16.3886				0.212615	147.911	22.057				0.258902	147.911	26.4099				0.256166	147.911	6.884
0.260071	148.201	4.5389				0.315985	148.201	7.4568				0.29093	148.201	16.8516				0.213032	148.201	22.342				0.25941	148.201	26.7707				0.256668	148.201	6.7032
0.260582	148.492	4.4942				0.316605	148.492	7.1644				0.291501	148.492	17.3737				0.213451	148.492	22.393				0.259919	148.492	26.7048				0.257172	148.492	6.5022
0.261091	148.782	4.523				0.317224	148.782	7.1029				0.29207	148.782	18.0054				0.213867	148.782	22.1				0.260427	148.782	26.6112				0.257674	148.782	6.2243
0.261601	149.073	4.6415				0.317844	149.073	7.0389				0.292641	149.073	18.4744				0.214286	149.073	22.007				0.260936	149.073	26.5756				0.258178	149.073	5.9116
0.262112	149.364	4.7333				0.318465	149.364	7.0581				0.293213	149.364	18.993				0.214704	149.364	21.847				0.261445	149.364	26.1304				0.258682	149.364	5.7509
0.262621	149.654	4.8151				0.319083	149.654	7.1365				0.293782	149.654	19.1291				0.215121	149.654	21.383				0.261953	149.654	25.4713				0.259184	149.654	5.5851
0.263132	149.945	4.807				0.319703	149.945	7.2637				0.294353	149.945	19.8089				0.215539	149.945	21.138				0.262462	149.945	25.2074				0.259688	149.945	5.5063
0.26364	150.235	4.7249				0.320322	150.235	7.3953				0.294923	150.235	19.8591				0.215956	150.235	20.962				0.26297	150.235	24.8734				0.26019	150.235	5.2716
0.264151	150.526	4.6365				0.320942	150.526	7.3823				0.295494	150.526	19.6394				0.216374	150.526	20.728				0.263479	150.526	24.732				0.260694	150.526	5.1999
0.264662	150.817	4.5771				0.321563	150.817	7.3625				0.296065	150.817	18.7213				0.216793	150.817	20.502				0.263989	150.817	24.4295				0.261198	150.817	5.0137
0.265171	151.107	4.5394				0.322181	151.107	7.5258				0.296634	151.107	16.9711				0.217209	151.107	20.293				0.264496	151.107	24.0743				0.261701	151.107	5.0312
0.265681	151.398	4.4977				0.322801	151.398	7.574				0.297206	151.398	15.3944				0.217628	151.398	20.403				0.265006	151.398	23.8247				0.262205	151.398	5.0348
0.26619	151.688	4.4828				0.32342	151.688	7.4209				0.297775	151.688	13.8883				0.218045	151.688	20.577				0.265513	151.688	23.0904				0.262707	151.688	5.0464
0.266701	151.979	4.3785				0.32404	151.979	7.3092				0.298346	151.979	13.134				0.218463	151.979	20.778				0.266023	151.979	22.2652				0.263211	151.979	4.9288
0.267212	152.27	4.2553				0.324661	152.27	7.2576				0.298917	152.27	12.8087				0.218881	152.27	21.152				0.266532	152.27	21.8276				0.263715	152.27	4.9728
0.267721	152.56	4.3227				0.325279	152.56	7.0675				0.299487	152.56	12.2148				0.219298	152.56	21.285				0.26704	152.56	21.1964				0.264217	152.56	4.8442
0.268231	152.851	4.3729				0.325899	152.851	6.8758				0.300058	152.851	11.5799				0.219716	152.851	21.577				0.267549	152.851	20.513				0.264721	152.851	4.7839
0.26874	153.141	4.337				0.326518	153.141	6.6742				0.300627	153.141	11.4793				0.220133	153.141	22.047				0.268057	153.141	20.3558				0.265223	153.141	4.7091
0.269251	153.432	4.3559				0.327138	153.432	6.5608				0.301198	153.432	11.4575				0.220552	153.432	22.292				0.268566	153.432	20.3544				0.265727	153.432	4.6906
0.26976	153.722	4.2873				0.327756	153.722	6.6044				0.301768	153.722	11.3172				0.220968	153.722	22.27				0.269074	153.722	20.1863				0.26623	153.722	4.509
0.27027	154.013	4.2301				0.328377	154.013	6.6004				0.302339	154.013	10.9951				0.221387	154.013	22.325				0.269583	154.013	20.1008				0.266734	154.013	4.5744
0.270781	154.304	4.2148				0.328997	154.304	6.7771				0.30291	154.304	10.8565				0.221805	154.304	22.433				0.270092	154.304	19.834				0.267237	154.304	4.555
0.27129	154.594	4.1998				0.329616	154.594	6.78				0.30348	154.594	10.4286				0.222222	154.594	22.657				0.2706	154.594	20.1364				0.26774	154.594	4.5517
0.271801	154.885	4.1656				0.330236	154.885	6.7874				0.304051	154.885	10.2715				0.22264	154.885	23.145				0.271109	154.885	20.1973				0.268244	154.885	4.5639
0.272309	155.175	4.1079				0.330854	155.175	6.845				0.30462	155.175	10.2058				0.223057	155.175	23.58				0.271617	155.175	20.4178				0.268746	155.175	4.5291
0.27282	155.466	4.0732				0.331475	155.466	6.9066				0.305191	155.466	10.0335				0.223475	155.466	23.515				0.272126	155.466	20.1198				0.26925	155.466	4.4875
0.273331	155.757	4.0156				0.332095	155.757	6.9409				0.305763	155.757	9.9273				0.223894	155.757	23.107				0.272636	155.757	20.3478				0.269754	155.757	4.5211
0.27384	156.047	4.1197				0.332714	156.047	7.0114				0.306332	156.047	9.7667				0.224311	156.047	22.847				0.273143	156.047	20.2488				0.270256	156.047	4.4429
0.27435	156.338	4.0869				0.333334	156.338	7.1706				0.306903	156.338	9.7816				0.224729	156.338	22.612				0.273653	156.338	20.0721				0.27076	156.338	4.3733
0.274859	156.628	3.9288				0.333952	156.628	7.1764				0.307472	156.628	9.7972				0.225146	156.628	22.048				0.27416	156.628	19.9485				0.271262	156.628	4.4267
0.27537	156.919	3.9109				0.334573	156.919	7.4787				0.308044	156.919	9.7757				0.225564	156.919	21.428				0.27467	156.919	20.0986				0.271766	156.919	4.4057
0.275881	157.21	3.8297				0.335193	157.21	7.4778				0.308615	157.21	9.779				0.225982	157.21	20.868				0.275179	157.21	20.1543				0.27227	157.21	4.39
0.276389	157.5	3.7703				0.335812	157.5	7.4706				0.309184	157.5	9.8358				0.226399	157.5	20.22				0.275687	157.5	20.124				0.272773	157.5	4.3433
0.2769	157.791	3.7694				0.336432	157.791	7.519				0.309755	157.791	9.9128				0.226817	157.791	19.718				0.276196	157.791	20.1571				0.273277	157.791	4.3078
0.277409	158.081	3.7334				0.33705	158.081	7.5977				0.310325	158.081	10.0688				0.227234	158.081	19.38				0.276704	158.081	20.7131				0.273779	158.081	4.2363
0.27792	158.372	3.7777				0.337671	158.372	7.7036				0.310896	158.372	10.3363				0.227653	158.372	19.365				0.277213	158.372	21.2351				0.274283	158.372	4.2272
0.27843	158.663	3.749				0.338291	158.663	7.8291				0.311467	158.663	10.4077				0.228071	158.663	19.515				0.277722	158.663	21.3774				0.274787	158.663	4.2865
0.278939	158.953	3.6084				0.33891	158.953	7.8745				0.312037	158.953	10.0981				0.228488	158.953	19.527				0.27823	158.953	21.8806				0.275289	158.953	4.3497
0.27945	159.244	3.6143				0.33953	159.244	7.766				0.312608	159.244	9.6736				0.228906	159.244	19.497				0.278739	159.244	22.6784				0.275793	159.244	4.3633
0.279959	159.534	3.6649				0.340148	159.534	7.7294				0.313177	159.534	9.2434				0.229323	159.534	19.608				0.279247	159.534	22.7167				0.276295	159.534	4.3842
0.28047	159.825	3.6296				0.340769	159.825	7.5231				0.313748	159.825	9.0337				0.229741	159.825	19.682				0.279756	159.825	23.0049				0.276799	159.825	4.3542
0.280978	160.115	3.6789				0.341387	160.115	7.5269				0.314318	160.115	8.8842				0.230158	160.115	19.895				0.280264	160.115	23.3802				0.277302	160.115	4.293
0.281489	160.406	3.7421				0.342008	160.406	7.3994				0.314889	160.406	8.5629				0.230576	160.406	20.528				0.280773	160.406	23.2942				0.277805	160.406	4.3057
0.282	160.697	3.6592				0.342628	160.697	7.5322				0.31546	160.697	8.2759				0.230995	160.697	21.405				0.281283	160.697	23.2223				0.278309	160.697	4.4269
0.282509	160.987	3.6743				0.343246	160.987	7.739				0.316029	160.987	8.0372				0.231412	160.987	22.127				0.28179	160.987	22.9387				0.278812	160.987	4.3506
0.283019	161.278	3.708				0.343867	161.278	7.7866				0.316601	161.278	7.715				0.23183	161.278	22.577				0.2823	161.278	22.8				0.279316	161.278	4.4397
0.283528	161.568	3.6445				0.344485	161.568	7.9308				0.31717	161.568	7.6635				0.232247	161.568	22.993				0.282807	161.568	23.0253				0.279818	161.568	4.3369
0.284039	161.859	3.6136				0.345106	161.859	7.8819				0.317741	161.859	7.4205				0.232665	161.859	23.37				0.283317	161.859	23.058				0.280322	161.859	4.2445
0.28455	162.15	3.5262				0.345726	162.15	7.9695				0.318313	162.15	7.2279				0.233083	162.15	23.885				0.283826	162.15	22.9442				0.280826	162.15	4.1656
0.285058	162.44	3.5878				0.346344	162.44	7.9991				0.318882	162.44	6.8653				0.2335	162.44	24.472				0.284333	162.44	22.9304				0.281328	162.44	4.1686
0.285569	162.731	3.63				0.346965	162.731	8.1004				0.319453	162.731	6.5116				0.233918	162.731	25.197				0.284843	162.731	22.7566				0.281832	162.731	4.0614
0.286078	163.021	3.6049				0.347583	163.021	8.3344				0.320022	163.021	6.2949				0.234335	163.021	25.767				0.28535	163.021	22.3404				0.282334	163.021	4.0464
0.286589	163.312	3.5522				0.348204	163.312	8.3345				0.320594	163.312	6.2728				0.234754	163.312	26.195				0.28586	163.312	21.9943				0.282838	163.312	4.0466
0.287099	163.603	3.5545				0.348824	163.603	8.2919				0.321165	163.603	6.1591				0.235172	163.603	26.51				0.286369	163.603	22.003				0.283342	163.603	4.1677
0.287608	163.893	3.5534				0.349442	163.893	8.133				0.321734	163.893	6.0718				0.235589	163.893	26.307				0.286877	163.893	21.7281				0.283845	163.893	4.1007
0.288119	164.184	3.5136				0.350063	164.184	7.9411				0.322305	164.184	6.1688				0.236007	164.184	25.965				0.287386	164.184	21.3434				0.284349	164.184	4.0853
0.288628	164.474	3.5755				0.350681	164.474	7.8586				0.322875	164.474	6.0682				0.236424	164.474	25.597				0.287894	164.474	21.3906				0.284851	164.474	4.1169
0.289139	164.765	3.6081				0.351302	164.765	7.6157				0.323446	164.765	6.1589				0.236842	164.765	25.048				0.288403	164.765	21.7434				0.285355	164.765	4.1854
0.289647	165.055	3.5865				0.35192	165.055	7.3697				0.324015	165.055	6.2698				0.237259	165.055	24.662				0.288911	165.055	22.2347				0.285857	165.055	4.1748
0.290158	165.346	3.6437				0.35254	165.346	7.3253				0.324587	165.346	6.5164				0.237677	165.346	24.785				0.28942	165.346	22.7936				0.286361	165.346	4.1996
0.290669	165.637	3.6533				0.353161	165.637	7.1596				0.325158	165.637	6.628				0.238096	165.637	25.107				0.289929	165.637	23.4192				0.286865	165.637	4.2459
0.291178	165.927	3.6851				0.353779	165.927	7.0912				0.325727	165.927	6.4325				0.238513	165.927	25.463				0.290437	165.927	23.9155				0.287367	165.927	4.1688
0.291688	166.218	3.6398				0.3544	166.218	6.8393				0.326298	166.218	6.1177				0.238931	166.218	25.365				0.290946	166.218	24.6803				0.287871	166.218	4.2838
0.292197	166.508	3.6889				0.355018	166.508	6.9084				0.326868	166.508	5.9485				0.239348	166.508	24.923				0.291454	166.508	25.1609				0.288373	166.508	4.2585
0.292708	166.799	3.6444				0.355638	166.799	6.7836				0.327439	166.799	5.9971				0.239766	166.799	24.553				0.291963	166.799	25.2342				0.288877	166.799	4.0715
0.293219	167.09	3.6001				0.356259	167.09	6.8151				0.32801	167.09	6.0924				0.240184	167.09	24.157				0.292473	167.09	25.445				0.289381	167.09	4.1143
0.293727	167.38	3.5561				0.356877	167.38	6.7241				0.328579	167.38	6.2178				0.240601	167.38	23.807				0.29298	167.38	25.82				0.289884	167.38	4.1656
0.294238	167.671	3.5687				0.357498	167.671	6.4924				0.329151	167.671	6.1397				0.24102	167.671	23.233				0.29349	167.671	25.9143				0.290388	167.671	4.2471
0.294747	167.961	3.6056				0.358116	167.961	6.6574				0.32972	167.961	6.0134				0.241436	167.961	22.963				0.293997	167.961	26.1824				0.29089	167.961	4.2735
0.295258	168.252	3.6967				0.358736	168.252	6.7364				0.330291	168.252	5.7442				0.241855	168.252	22.832				0.294507	168.252	26.4021				0.291394	168.252	4.2331
0.295768	168.543	3.7655				0.359357	168.543	6.8955				0.330862	168.543	5.4836				0.242273	168.543	22.498				0.295016	168.543	26.7925				0.291898	168.543	4.3271
0.296277	168.833	3.6999				0.359975	168.833	7.0058				0.331432	168.833	5.549				0.24269	168.833	22.215				0.295524	168.833	27.3368				0.2924	168.833	4.388
0.296788	169.124	3.7068				0.360596	169.124	7.1133				0.332003	169.124	5.5255				0.243108	169.124	22.065				0.296033	169.124	26.8043				0.292904	169.124	4.3478
0.297297	169.414	3.8393				0.361214	169.414	7.1749				0.332572	169.414	5.7382				0.243525	169.414	21.867				0.296541	169.414	26.274				0.293406	169.414	4.3653
0.297807	169.705	3.9082				0.361834	169.705	7.4696				0.333144	169.705	5.985				0.243943	169.705	21.405				0.29705	169.705	25.6186				0.29391	169.705	4.3817
0.298318	169.996	3.9294				0.362455	169.996	7.7889				0.333715	169.996	6.1486				0.244362	169.996	21.11				0.297559	169.996	24.7476				0.294414	169.996	4.5327
0.298827	170.286	4.0946				0.363073	170.286	7.9796				0.334284	170.286	6.3444				0.244778	170.286	21.093				0.298067	170.286	23.8957				0.294917	170.286	4.4582
0.299338	170.577	4.1464				0.363694	170.577	8.2827				0.334855	170.577	6.5079				0.245197	170.577	21.045				0.298576	170.577	23.0947				0.295421	170.577	4.4473
0.299847	170.867	4.1627				0.364312	170.867	8.5041				0.335425	170.867	6.6371				0.245614	170.867	21.083				0.299084	170.867	22.3852				0.295923	170.867	4.5735
0.300357	171.158	4.0911				0.364932	171.158	8.6299				0.335996	171.158	6.8487				0.246032	171.158	21.115				0.299593	171.158	21.7203				0.296427	171.158	4.687
0.300868	171.449	4.1258				0.365553	171.449	8.7746				0.336567	171.449	7.085				0.24645	171.449	20.933				0.300103	171.449	21.252				0.296931	171.449	4.6489
0.301377	171.739	4.0656				0.366171	171.739	8.8678				0.337136	171.739	7.3356				0.246867	171.739	20.765				0.30061	171.739	20.727				0.297433	171.739	4.6488
0.301888	172.03	3.9682				0.366792	172.03	8.9388				0.337708	172.03	7.9623				0.247285	172.03	20.398				0.30112	172.03	20.3193				0.297937	172.03	4.6897
0.302396	172.32	4.0575				0.36741	172.32	8.8176				0.338277	172.32	8.7379				0.247702	172.32	20.27				0.301627	172.32	20.6531				0.298439	172.32	4.7135
0.302907	172.611	4.0874				0.36803	172.611	8.6675				0.338848	172.611	9.2513				0.248121	172.611	20.177				0.302137	172.611	20.6381				0.298943	172.611	4.682
0.303416	172.901	4.0855				0.368649	172.901	8.5744				0.339418	172.901	9.5251				0.248537	172.901	19.788				0.302644	172.901	20.5307				0.299445	172.901	4.782
0.303927	173.192	3.9782				0.369269	173.192	8.5688				0.339989	173.192	9.6995				0.248956	173.192	19.55				0.303154	173.192	20.5002				0.299949	173.192	4.653
0.304437	173.483	3.8758				0.36989	173.483	8.5844				0.34056	173.483	9.5497				0.249374	173.483	19.488				0.303663	173.483	20.7523				0.300453	173.483	4.674
0.304946	173.773	3.8022				0.370508	173.773	8.6295				0.341129	173.773	9.5515				0.249791	173.773	19.515				0.304171	173.773	20.8182				0.300956	173.773	4.6496
0.305457	174.064	3.7551				0.371128	174.064	8.7042				0.341701	174.064	9.3576				0.250209	174.064	19.487				0.30468	174.064	21.0057				0.30146	174.064	4.6226
0.305966	174.354	3.7058				0.371747	174.354	9.0051				0.34227	174.354	9.1783				0.250626	174.354	19.417				0.305188	174.354	20.8863				0.301962	174.354	4.559
0.306476	174.645	3.7483				0.372367	174.645	9.24				0.342841	174.645	8.9528				0.251044	174.645	19.403				0.305697	174.645	20.5131				0.302466	174.645	4.4385
0.306987	174.936	3.6314				0.372988	174.936	9.1972				0.343412	174.936	8.5831				0.251463	174.936	19.343				0.306206	174.936	20.4365				0.30297	174.936	4.4137
0.307496	175.226	3.5606				0.373606	175.226	9.5728				0.343982	175.226	8.1942				0.251879	175.226	19.045				0.306714	175.226	19.7972				0.303472	175.226	4.2865
0.308007	175.517	3.5238				0.374226	175.517	9.8558				0.344553	175.517	8.0721				0.252298	175.517	18.602				0.307223	175.517	19.1248				0.303976	175.517	4.267
0.308516	175.807	3.4619				0.374845	175.807	9.983				0.345122	175.807	7.9549				0.252715	175.807	18.493				0.307731	175.807	18.8275				0.304478	175.807	4.2002
0.309026	176.098	3.4476				0.375465	176.098	10.0421				0.345694	176.098	7.7575				0.253133	176.098	18.377				0.30824	176.098	18.264				0.304982	176.098	4.0628
0.309537	176.389	3.402				0.376086	176.389	10.2104				0.346265	176.389	7.892				0.253551	176.389	17.878				0.30875	176.389	17.9361				0.305486	176.389	4.2012
0.310046	176.679	3.4316				0.376704	176.679	10.3394				0.346834	176.679	7.7843				0.253968	176.679	17.503				0.309257	176.679	17.6894				0.305989	176.679	4.1085
0.310556	176.97	3.4019				0.377324	176.97	10.3232				0.347405	176.97	7.6869				0.254386	176.97	17.178				0.309767	176.97	17.2043				0.306493	176.97	4.0965
0.311065	177.26	3.3892				0.377943	177.26	10.4483				0.347975	177.26	7.6973				0.254803	177.26	16.833				0.310274	177.26	17.3397				0.306995	177.26	4.182
0.311576	177.551	3.358				0.378563	177.551	10.5075				0.348546	177.551	7.524				0.255222	177.551	16.663				0.310784	177.551	17.0906				0.307499	177.551	4.127
0.312085	177.841	3.4321				0.379181	177.841	10.3621				0.349115	177.841	7.2139				0.255638	177.841	16.767				0.311291	177.841	16.8792				0.308001	177.841	4.1601
0.312596	178.132	3.3325				0.379802	178.132	10.0746				0.349686	178.132	7.0457				0.256057	178.132	17.095				0.311801	178.132	16.8104				0.308505	178.132	4.2397
0.313106	178.423	3.3374				0.380422	178.423	9.3842				0.350258	178.423	6.784				0.256475	178.423	17.093				0.31231	178.423	16.6677				0.309009	178.423	4.311
0.313615	178.713	3.3526				0.381041	178.713	8.7951				0.350827	178.713	6.6082				0.256892	178.713	16.977				0.312818	178.713	16.2735				0.309511	178.713	4.1841
0.314126	179.004	3.3766				0.381661	179.004	7.9854				0.351398	179.004	6.4895				0.25731	179.004	17.332				0.313327	179.004	16.1943				0.310015	179.004	4.1681
0.314635	179.294	3.3951				0.382279	179.294	7.6181				0.351967	179.294	6.4538				0.257727	179.294	17.627				0.313835	179.294	16.0743				0.310517	179.294	4.1961
0.315145	179.585	3.2641				0.3829	179.585	7.3009				0.352539	179.585	6.3374				0.258145	179.585	17.618				0.314344	179.585	15.917				0.311021	179.585	4.1356
0.315656	179.876	3.2586				0.38352	179.876	7.1922				0.35311	179.876	6.2127				0.258564	179.876	17.737				0.314853	179.876	15.9404				0.311525	179.876	4.1884
0.316165	180.166	3.2625				0.384139	180.166	7.0605				0.353679	180.166	6.0841				0.25898	180.166	17.987				0.315361	180.166	15.5569				0.312028	180.166	4.2945
0.316676	180.457	3.2696				0.384759	180.457	6.9779				0.354251	180.457	6.012				0.259399	180.457	17.92				0.31587	180.457	15.4441				0.312532	180.457	4.2724
0.317185	180.747	3.224				0.385377	180.747	7.0037				0.35482	180.747	5.8372				0.259816	180.747	17.707				0.316378	180.747	15.4883				0.313034	180.747	4.2001
0.317695	181.038	3.2262				0.385998	181.038	6.9691				0.355391	181.038	5.7798				0.260234	181.038	17.465				0.316887	181.038	15.4581				0.313538	181.038	4.1779
0.318206	181.329	3.2716				0.386618	181.329	6.9207				0.355962	181.329	5.4683				0.260652	181.329	17.078				0.317397	181.329	15.4284				0.314042	181.329	4.1564
0.318715	181.619	3.1506				0.387237	181.619	6.7639				0.356532	181.619	5.3132				0.261069	181.619	16.818				0.317904	181.619	15.5386				0.314544	181.619	4.2057
0.319225	181.91	3.1866				0.387857	181.91	6.7586				0.357103	181.91	5.201				0.261487	181.91	16.685				0.318414	181.91	15.2951				0.315048	181.91	4.1453
0.319734	182.2	3.153				0.388475	182.2	6.6087				0.357672	182.2	5.0002				0.261904	182.2	16.493				0.318921	182.2	15.0774				0.31555	182.2	4.1316
0.320245	182.491	3.1785				0.389096	182.491	6.6583				0.358243	182.491	4.9237				0.262323	182.491	16.483				0.319431	182.491	15.1623				0.316054	182.491	4.0959
0.320756	182.782	3.1268				0.389716	182.782	6.492				0.358815	182.782	4.9735				0.262741	182.782	16.592				0.31994	182.782	15.0239				0.316558	182.782	4.0887
0.321265	183.072	3.1335				0.390335	183.072	6.3592				0.359384	183.072	4.9343				0.263158	183.072	16.548				0.320448	183.072	15.16				0.31706	183.072	4.1484
0.321775	183.363	3.1071				0.390955	183.363	6.2443				0.359955	183.363	4.8557				0.263576	183.363	16.5				0.320957	183.363	15.0489				0.317564	183.363	4.1062
0.322284	183.653	3.0223				0.391573	183.653	5.99				0.360525	183.653	4.8013				0.263993	183.653	16.605				0.321465	183.653	14.9432				0.318067	183.653	4.0823
0.322795	183.944	3.0724				0.392194	183.944	6.0033				0.361096	183.944	4.8045				0.264411	183.944	16.698				0.321974	183.944	14.8392				0.318571	183.944	4.0519
0.323304	184.234	3.033				0.392812	184.234	5.8684				0.361665	184.234	4.7093				0.264828	184.234	16.775				0.322481	184.234	14.6989				0.319073	184.234	3.9166
0.323814	184.525	3.0865				0.393433	184.525	5.954				0.362236	184.525	4.7049				0.265246	184.525	17.09				0.322991	184.525	14.915				0.319577	184.525	3.9989
0.324325	184.816	3.0109				0.394053	184.816	5.9035				0.362808	184.816	4.7075				0.265665	184.816	17.343				0.3235	184.816	15.0673				0.320081	184.816	3.9376
0.324834	185.106	3.0235				0.394671	185.106	5.9921				0.363377	185.106	4.5945				0.266082	185.106	17.575				0.324008	185.106	14.9244				0.320583	185.106	4.0467
0.325345	185.397	2.9813				0.395292	185.397	6.0142				0.363948	185.397	4.688				0.2665	185.397	17.76				0.324517	185.397	14.9436				0.321087	185.397	4.0499
0.325854	185.687	3.0467				0.39591	185.687	6.0417				0.364517	185.687	4.4418				0.266917	185.687	17.617				0.325025	185.687	14.9563				0.321589	185.687	4.1534
0.326364	185.978	3.0322				0.396531	185.978	6.0284				0.365089	185.978	4.36				0.267335	185.978	17.507				0.325534	185.978	14.993				0.322093	185.978	4.1119
0.326875	186.269	3.0246				0.397151	186.269	6.0112				0.36566	186.269	4.3227				0.267753	186.269	17.46				0.326044	186.269	15.1779				0.322597	186.269	4.0686
0.327384	186.559	3.0117				0.397769	186.559	6.1487				0.366229	186.559	4.274				0.26817	186.559	17.38				0.326551	186.559	15.0767				0.3231	186.559	4.0426
0.327894	186.85	3.029				0.39839	186.85	6.0883				0.3668	186.85	4.2508				0.268588	186.85	17.44				0.327061	186.85	15.1646				0.323604	186.85	4.0864
0.328403	187.14	3.0803				0.399008	187.14	5.9293				0.36737	187.14	4.1899				0.269005	187.14	17.513				0.327568	187.14	15.2785				0.324106	187.14	4.0227
0.328914	187.431	3.1373				0.399629	187.431	5.8195				0.367941	187.431	4.1057				0.269424	187.431	17.623				0.328077	187.431	15.1602				0.32461	187.431	3.9944
0.329425	187.722	3.1184				0.400249	187.722	5.8298				0.368512	187.722	4.095				0.269842	187.722	17.682				0.328587	187.722	14.9266				0.325114	187.722	3.96
0.329934	188.012	3.0588				0.400867	188.012	5.7844				0.369082	188.012	4.2068				0.270259	188.012	17.622				0.329094	188.012	14.8782				0.325616	188.012	4.0681
0.330444	188.303	3.086				0.401488	188.303	5.7728				0.369653	188.303	4.1407				0.270677	188.303	17.582				0.329604	188.303	14.9516				0.32612	188.303	4.1094
0.330953	188.593	3.0366				0.402106	188.593	5.818				0.370222	188.593	4.0951				0.271094	188.593	17.542				0.330111	188.593	15.1071				0.326622	188.593	4.1171
0.331464	188.884	3.0954				0.402727	188.884	5.8751				0.370793	188.884	4.0758				0.271512	188.884	17.595				0.330621	188.884	15.0294				0.327126	188.884	4.1339
0.331974	189.175	3.0558				0.403347	189.175	5.8483				0.371365	189.175	3.956				0.271931	189.175	17.627				0.33113	189.175	14.9986				0.32763	189.175	4.1555
0.332483	189.465	3.0812				0.403965	189.465	5.9158				0.371934	189.465	3.9779				0.272347	189.465	17.315				0.331638	189.465	14.9858				0.328132	189.465	4.1529
0.332994	189.756	3.0464				0.404586	189.756	5.8458				0.372505	189.756	3.9523				0.272766	189.756	17.052				0.332147	189.756	14.978				0.328636	189.756	4.2435
0.333503	190.046	3.0541				0.405204	190.046	5.9232				0.373074	190.046	3.9427				0.273183	190.046	17.018				0.332655	190.046	15.1086				0.329139	190.046	4.1664
0.334014	190.337	3.0531				0.405825	190.337	5.9159				0.373646	190.337	3.952				0.273601	190.337	16.968				0.333164	190.337	14.8089				0.329643	190.337	4.211
0.334523	190.627	2.9997				0.406443	190.627	6.0905				0.374215	190.627	3.9389				0.274018	190.627	17.062				0.333672	190.627	14.4012				0.330145	190.627	4.1463
0.335033	190.918	3.0307				0.407063	190.918	6.1223				0.374786	190.918	3.9455				0.274436	190.918	17.363				0.334181	190.918	14.3143				0.330649	190.918	4.2672
0.335544	191.209	3.0673				0.407684	191.209	5.9879				0.375358	191.209	3.9006				0.274854	191.209	17.558				0.33469	191.209	14.3038				0.331153	191.209	4.2957
0.336053	191.499	3.0593				0.408302	191.499	6.1101				0.375927	191.499	3.8163				0.275271	191.499	17.688				0.335198	191.499	14.3417				0.331655	191.499	4.3424
0.336563	191.79	3.0876				0.408923	191.79	6.151				0.376498	191.79	3.7721				0.275689	191.79	17.773				0.335707	191.79	14.2289				0.332159	191.79	4.617
0.337072	192.08	3.1624				0.409541	192.08	6.2974				0.377067	192.08	3.7919				0.276106	192.08	17.628				0.336215	192.08	14.1421				0.332661	192.08	5.0743
0.337583	192.371	3.3305				0.410161	192.371	6.1689				0.377639	192.371	3.7674				0.276525	192.371	17.677				0.336724	192.371	14.2387				0.333165	192.371	5.4392
0.338094	192.662	3.1958				0.410782	192.662	6.1624				0.37821	192.662	3.7434				0.276943	192.662	17.63				0.337234	192.662	14.0122				0.333669	192.662	5.6995
0.338603	192.952	3.1891				0.4114	192.952	6.0593				0.378779	192.952	3.8244				0.27736	192.952	17.528				0.337741	192.952	13.7871				0.334172	192.952	5.7377
0.339113	193.243	3.1355				0.412021	193.243	5.7776				0.37935	193.243	3.9339				0.277778	193.243	17.293				0.338251	193.243	13.6405				0.334676	193.243	5.7243
0.339622	193.533	3.1239				0.412639	193.533	5.7337				0.37992	193.533	3.9397				0.278195	193.533	16.783				0.338758	193.533	13.5538				0.335178	193.533	5.6433
0.340133	193.824	3.2104				0.413259	193.824	5.6443				0.380491	193.824	3.9262				0.278613	193.824	16.533				0.339268	193.824	13.468				0.335682	193.824	5.5029
0.340643	194.115	3.1595				0.41388	194.115	5.5324				0.381062	194.115	3.9107				0.279032	194.115	16.222				0.339777	194.115	13.3536				0.336186	194.115	5.3544
0.341152	194.405	3.1442				0.414498	194.405	5.6193				0.381632	194.405	3.946				0.279448	194.405	16.013				0.340285	194.405	13.2325				0.336688	194.405	5.3276
0.341663	194.696	3.216				0.415119	194.696	5.5356				0.382203	194.696	3.8981				0.279867	194.696	16.073				0.340794	194.696	13.0904				0.337192	194.696	5.199
0.342172	194.986	3.2548				0.415737	194.986	5.5378				0.382772	194.986	3.899				0.280284	194.986	15.982				0.341302	194.986	13.0372				0.337694	194.986	5.3349
0.342683	195.277	3.271				0.416357	195.277	5.4761				0.383343	195.277	3.8541				0.280702	195.277	15.88				0.341811	195.277	12.8324				0.338198	195.277	5.2938
0.343193	195.568	3.2644				0.416978	195.568	5.6801				0.383915	195.568	3.8281				0.28112	195.568	15.85				0.34232	195.568	12.762				0.338702	195.568	5.3985
0.343702	195.858	3.3389				0.417596	195.858	5.8395				0.384484	195.858	3.7898				0.281537	195.858	15.947				0.342828	195.858	12.6766				0.339204	195.858	5.4379
0.344213	196.149	3.4144				0.418217	196.149	6.0437				0.385055	196.149	3.7258				0.281955	196.149	15.992				0.343337	196.149	12.8665				0.339708	196.149	5.2731
0.344722	196.439	3.5508				0.418835	196.439	6.1916				0.385624	196.439	3.5998				0.282372	196.439	15.793				0.343845	196.439	12.8348				0.340211	196.439	5.1501
0.345232	196.73	3.52				0.419455	196.73	6.4512				0.386196	196.73	3.6287				0.282791	196.73	15.687				0.344354	196.73	12.6693				0.340715	196.73	5.1187
0.345741	197.02	3.5889				0.420074	197.02	6.6196				0.386765	197.02	3.5883				0.283207	197.02	15.737				0.344862	197.02	12.4973				0.341217	197.02	5.0387
0.346252	197.311	3.6355				0.420694	197.311	6.8968				0.387336	197.311	3.6242				0.283626	197.311	15.625				0.345371	197.311	12.3703				0.341721	197.311	4.9364
0.346763	197.602	3.6558				0.421315	197.602	7.0565				0.387907	197.602	3.5813				0.284044	197.602	15.298				0.345881	197.602	12.2228				0.342225	197.602	4.9889
0.347272	197.892	3.7316				0.421933	197.892	7.259				0.388477	197.892	3.5276				0.284461	197.892	15.105				0.346388	197.892	12.2707				0.342727	197.892	4.9989
0.347782	198.183	3.5688				0.422553	198.183	7.5352				0.389048	198.183	3.5118				0.284879	198.183	14.822				0.346898	198.183	12.0562				0.343231	198.183	5.0766
0.348291	198.473	3.5422				0.423172	198.473	7.323				0.389617	198.473	3.448				0.285296	198.473	14.758				0.347405	198.473	12.2075				0.343733	198.473	5.1414
0.348802	198.764	3.5426				0.423792	198.764	7.4035				0.390189	198.764	3.4224				0.285714	198.764	14.865				0.347915	198.764	12.2217				0.344237	198.764	5.3008
0.349312	199.055	3.4878				0.424413	199.055	7.4581				0.39076	199.055	3.4172				0.286133	199.055	14.802				0.348424	199.055	12.1722				0.344741	199.055	5.385
0.349821	199.345	3.4867				0.425031	199.345	7.3024				0.391329	199.345	3.4563				0.286549	199.345	14.792				0.348932	199.345	12.0479				0.345244	199.345	5.3305
0.350332	199.636	3.4292				0.425651	199.636	7.1562				0.3919	199.636	3.3994				0.286968	199.636	14.875				0.349441	199.636	11.8291				0.345748	199.636	5.412
0.350841	199.926	3.6059				0.42627	199.926	6.9727				0.39247	199.926	3.3536				0.287385	199.926	15.057				0.349949	199.926	11.8846				0.34625	199.926	5.479
0.351352	200.217	3.4801				0.42689	200.217	6.8071				0.393041	200.217	3.34				0.287803	200.217	15.07				0.350458	200.217	11.9296				0.346754	200.217	5.6687
0.351862	200.508	3.479				0.427511	200.508	6.5382				0.393612	200.508	3.4666				0.288221	200.508	15.337				0.350967	200.508	12.1034				0.347258	200.508	5.8208
0.352371	200.798	3.4433				0.428129	200.798	6.3191				0.394181	200.798	3.4222				0.288638	200.798	15.832				0.351475	200.798	12.1807				0.34776	200.798	5.9019
0.352882	201.089	3.4677				0.428749	201.089	6.1672				0.394753	201.089	3.492				0.289056	201.089	16.12				0.351984	201.089	12.1208				0.348264	201.089	5.9457
0.353391	201.379	3.3976				0.429368	201.379	5.9738				0.395322	201.379	3.5016				0.289473	201.379	16.287				0.352492	201.379	11.9301				0.348766	201.379	5.9137
0.353901	201.67	3.3785				0.429988	201.67	5.813				0.395893	201.67	3.6554				0.289892	201.67	16.358				0.353001	201.67	12.0009				0.34927	201.67	5.8197
0.354412	201.961	3.3689				0.430609	201.961	5.6751				0.396465	201.961	3.629				0.29031	201.961	16.173				0.353511	201.961	11.8764				0.349774	201.961	5.7383
0.354921	202.251	3.2653				0.431227	202.251	5.6201				0.397034	202.251	3.7032				0.290727	202.251	15.928				0.354018	202.251	11.9029				0.350276	202.251	5.8605
0.355432	202.542	3.3091				0.431847	202.542	5.5601				0.397605	202.542	3.6921				0.291145	202.542	15.648				0.354528	202.542	11.8414				0.35078	202.542	5.8839
0.355941	202.832	3.3463				0.432466	202.832	5.5075				0.398174	202.832	3.7149				0.291562	202.832	15.093				0.355035	202.832	11.9				0.351283	202.832	6.0991
0.356451	203.123	3.3012				0.433086	203.123	5.3287				0.398746	203.123	3.6148				0.29198	203.123	14.61				0.355545	203.123	11.9983				0.351787	203.123	6.3612
0.35696	203.413	3.24				0.433704	203.413	5.2132				0.399315	203.413	3.7418				0.292397	203.413	14.335				0.356052	203.413	11.9825				0.352289	203.413	6.6527
0.357471	203.704	3.2102				0.434325	203.704	5.1797				0.399886	203.704	3.8002				0.292815	203.704	14.185				0.356562	203.704	11.8934				0.352793	203.704	7.0065
0.357981	203.995	3.2971				0.434945	203.995	5.3103				0.400457	203.995	3.7923				0.293234	203.995	14.232				0.357071	203.995	11.8325				0.353297	203.995	7.3013
0.35849	204.285	3.2385				0.435564	204.285	5.2171				0.401027	204.285	3.7886				0.29365	204.285	14.173				0.357579	204.285	11.8052				0.353799	204.285	7.5367
0.359001	204.576	3.2325				0.436184	204.576	5.3118				0.401598	204.576	3.8777				0.294069	204.576	14.007				0.358088	204.576	11.687				0.354303	204.576	7.9491
0.35951	204.866	3.1923				0.436802	204.866	5.3773				0.402167	204.866	3.9221				0.294486	204.866	13.853				0.358596	204.866	11.4003				0.354805	204.866	8.2841
0.360021	205.157	3.178				0.437423	205.157	5.3488				0.402738	205.157	3.8208				0.294904	205.157	13.775				0.359105	205.157	11.3354				0.355309	205.157	8.4627
0.360531	205.448	3.1977				0.438043	205.448	5.4448				0.40331	205.448	3.8533				0.295322	205.448	13.767				0.359614	205.448	11.3251				0.355813	205.448	8.6396
0.36104	205.738	3.2594				0.438662	205.738	5.581				0.403879	205.738	3.7347				0.295739	205.738	13.583				0.360122	205.738	11.3563				0.356316	205.738	8.7739
0.361551	206.029	3.3034				0.439282	206.029	5.6367				0.40445	206.029	3.6979				0.296157	206.029	13.357				0.360631	206.029	11.2653				0.356819	206.029	8.7534
0.36206	206.319	3.4161				0.4399	206.319	5.6993				0.40502	206.319	3.6175				0.296574	206.319	13.17				0.361139	206.319	11.1765				0.357322	206.319	8.1636
0.36257	206.61	3.5318				0.440521	206.61	5.5968				0.405591	206.61	3.7182				0.296993	206.61	12.952				0.361648	206.61	11.289				0.357826	206.61	7.2172
0.363081	206.901	3.561				0.441141	206.901	5.6741				0.406162	206.901	3.6921				0.297411	206.901	12.775				0.362158	206.901	11.5066				0.35833	206.901	6.2397
0.36359	207.191	3.6427				0.44176	207.191	5.7678				0.406731	207.191	3.7898				0.297828	207.191	12.672				0.362665	207.191	11.6383				0.358832	207.191	5.6019
0.364101	207.482	3.6977				0.44238	207.482	5.913				0.407303	207.482	3.5933				0.298246	207.482	12.598				0.363175	207.482	11.5148				0.359336	207.482	5.0829
0.36461	207.772	3.6929				0.442998	207.772	5.7993				0.407872	207.772	3.5571				0.298663	207.772	12.552				0.363682	207.772	11.5747				0.359838	207.772	4.6853
0.36512	208.063	3.8056				0.443619	208.063	5.8646				0.408443	208.063	3.628				0.299081	208.063	12.403				0.364192	208.063	11.5819				0.360342	208.063	4.5314
0.365631	208.354	3.8792				0.444239	208.354	5.7107				0.409014	208.354	3.6572				0.299499	208.354	12.283				0.364701	208.354	11.5043				0.360846	208.354	4.3874
0.36614	208.644	3.9101				0.444858	208.644	5.5902				0.409584	208.644	3.6959				0.299916	208.644	12.367				0.365209	208.644	11.5339				0.361348	208.644	4.3759
0.36665	208.935	3.9005				0.445478	208.935	5.489				0.410155	208.935	3.8416				0.300335	208.935	12.298				0.365718	208.935	11.5481				0.361852	208.935	4.2655
0.367159	209.225	3.6107				0.446096	209.225	5.4401				0.410724	209.225	3.9533				0.300752	209.225	12.24				0.366226	209.225	11.5654				0.362355	209.225	4.228
0.36767	209.516	3.6045				0.446717	209.516	5.3436				0.411296	209.516	3.9685				0.30117	209.516	12.24				0.366735	209.516	11.7736				0.362859	209.516	4.3323
0.368179	209.806	3.4402				0.447335	209.806	5.2528				0.411865	209.806	4.0359				0.301587	209.806	12.197				0.367242	209.806	11.821				0.363361	209.806	4.3213
0.36869	210.097	3.3883				0.447956	210.097	5.2443				0.412436	210.097	3.9142				0.302005	210.097	12.263				0.367752	210.097	11.9455				0.363865	210.097	4.3486
0.3692	210.388	3.333				0.448576	210.388	5.1252				0.413007	210.388	3.9645				0.302423	210.388	12.243				0.368261	210.388	12.0306				0.364369	210.388	4.3156
0.369709	210.678	3.2351				0.449194	210.678	5.2529				0.413577	210.678	3.9308				0.30284	210.678	12.175				0.368769	210.678	12.0627				0.364871	210.678	4.3661
0.37022	210.969	3.1889				0.449815	210.969	5.2625				0.414148	210.969	3.9653				0.303258	210.969	12.008				0.369278	210.969	12.0011				0.365375	210.969	4.4019
0.370729	211.259	3.1443				0.450433	211.259	5.1976				0.414717	211.259	4.013				0.303675	211.259	11.892				0.369786	211.259	11.6986				0.365877	211.259	4.5816
0.371239	211.55	3.1034				0.451054	211.55	5.2001				0.415288	211.55	3.9496				0.304094	211.55	11.855				0.370295	211.55	11.7443				0.366381	211.55	4.7837
0.37175	211.841	3.031				0.451674	211.841	5.2423				0.41586	211.841	3.9467				0.304512	211.841	11.767				0.370805	211.841	11.6008				0.366885	211.841	4.8328
0.372259	212.131	3.0958				0.452292	212.131	5.175				0.416429	212.131	4.0253				0.304929	212.131	11.685				0.371312	212.131	11.5592				0.367387	212.131	4.7919
0.37277	212.422	3.1299				0.452913	212.422	5.2707				0.417	212.422	3.9231				0.305347	212.422	11.657				0.371822	212.422	11.4819				0.367891	212.422	4.8801
0.373278	212.712	3.1034				0.453531	212.712	5.2118				0.41757	212.712	3.9573				0.305764	212.712	11.707				0.372329	212.712	11.3876				0.368394	212.712	4.9842
0.373789	213.003	2.9989				0.454152	213.003	5.083				0.418141	213.003	4.0185				0.306182	213.003	11.492				0.372838	213.003	11.6042				0.368898	213.003	4.9195
0.3743	213.294	3.0381				0.454772	213.294	5.0145				0.418712	213.294	4.0272				0.306601	213.294	11.348				0.373348	213.294	11.7538				0.369402	213.294	4.7964
0.374809	213.584	3.196				0.45539	213.584	4.885				0.419281	213.584	4.0241				0.307017	213.584	11.347				0.373855	213.584	11.9109				0.369904	213.584	4.8228
0.375319	213.875	3.174				0.456011	213.875	5.0452				0.419853	213.875	3.9772				0.307436	213.875	11.01				0.374365	213.875	12.0502				0.370408	213.875	4.9052
0.375828	214.165	3.1881				0.456629	214.165	5.075				0.420422	214.165	4.1172				0.307853	214.165	10.8				0.374872	214.165	12.2287				0.37091	214.165	4.8707
0.376339	214.456	3.2147				0.45725	214.456	4.9811				0.420993	214.456	4.1572				0.308271	214.456	10.773				0.375382	214.456	11.9809				0.371414	214.456	4.8302
0.37685	214.747	3.1857				0.45787	214.747	4.9861				0.421564	214.747	4.3657				0.308689	214.747	10.59				0.375891	214.747	11.9513				0.371918	214.747	4.8343
0.377359	215.037	3.1795				0.458488	215.037	5.0589				0.422134	215.037	4.4087				0.309106	215.037	10.395				0.376399	215.037	12.2348				0.37242	215.037	4.8836
0.377869	215.328	3.125				0.459109	215.328	5.0277				0.422705	215.328	4.4127				0.309524	215.328	10.25				0.376908	215.328	12.1474				0.372924	215.328	4.754
0.378378	215.618	3.0774				0.459727	215.618	5.211				0.423274	215.618	4.4033				0.309941	215.618	10.08				0.377416	215.618	12.1666				0.373427	215.618	4.7658
0.378889	215.909	3.202				0.460348	215.909	5.3082				0.423845	215.909	4.3461				0.310359	215.909	9.997				0.377925	215.909	12.4374				0.373931	215.909	4.7433
0.379398	216.199	3.0806				0.460966	216.199	5.2849				0.424415	216.199	4.3963				0.310776	216.199	9.91				0.378433	216.199	12.221				0.374433	216.199	4.6144
0.379908	216.49	3.0926				0.461586	216.49	5.321				0.424986	216.49	4.3419				0.311195	216.49	9.805				0.378942	216.49	12.3444				0.374937	216.49	4.501
0.380419	216.781	3.0174				0.462207	216.781	5.2506				0.425557	216.781	4.3736				0.311613	216.781	9.763				0.379451	216.781	12.1243				0.375441	216.781	4.5143
0.380928	217.071	3.0419				0.462825	217.071	5.3348				0.426127	217.071	4.2741				0.31203	217.071	9.732				0.379959	217.071	12.1463				0.375943	217.071	4.4297
0.381439	217.362	3.0554				0.463446	217.362	5.3171				0.426698	217.362	4.3334				0.312448	217.362	9.76				0.380468	217.362	12.1676				0.376447	217.362	4.2978
0.381947	217.652	2.9997				0.464064	217.652	5.4196				0.427267	217.652	4.374				0.312865	217.652	9.698				0.380976	217.652	12.0859				0.376949	217.652	4.2636
0.382458	217.943	2.962				0.464684	217.943	5.5128				0.427838	217.943	4.3948				0.313283	217.943	9.583				0.381485	217.943	11.8224				0.377453	217.943	4.136
0.382969	218.234	2.8845				0.465305	218.234	5.6647				0.42841	218.234	4.4634				0.313702	218.234	9.602				0.381995	218.234	11.8957				0.377957	218.234	4.1449
0.383478	218.524	2.9903				0.465923	218.524	5.7577				0.428979	218.524	4.586				0.314118	218.524	9.542				0.382502	218.524	11.9182				0.378459	218.524	4.1215
0.383988	218.815	2.9626				0.466544	218.815	5.665				0.42955	218.815	4.647				0.314537	218.815	9.563				0.383012	218.815	11.7898				0.378963	218.815	4.0985
0.384497	219.105	2.8968				0.467162	219.105	5.7024				0.430119	219.105	4.6774				0.314954	219.105	9.74				0.383519	219.105	11.848				0.379466	219.105	4.1143
0.385008	219.396	2.8799				0.467782	219.396	5.79				0.430691	219.396	4.7983				0.315372	219.396	9.833				0.384029	219.396	11.8083				0.37997	219.396	4.1604
0.385519	219.687	2.9281				0.468403	219.687	5.9009				0.431262	219.687	4.8509				0.31579	219.687	9.985				0.384538	219.687	11.6916				0.380474	219.687	4.1597
0.386028	219.977	2.9604				0.469021	219.977	6.0198				0.431831	219.977	4.803				0.316207	219.977	10.178				0.385046	219.977	11.6854				0.380976	219.977	4.0994
0.386538	220.268	2.8696				0.469642	220.268	5.9594				0.432403	220.268	4.8664				0.316625	220.268	10.37				0.385555	220.268	11.6151				0.38148	220.268	4.058
0.387047	220.558	2.9076				0.47026	220.558	6.0222				0.432972	220.558	4.9225				0.317042	220.558	10.513				0.386063	220.558	11.4963				0.381982	220.558	4.0013
0.387558	220.849	2.8443				0.47088	220.849	6.2119				0.433543	220.849	4.9379				0.31746	220.849	10.502				0.386572	220.849	11.4559				0.382486	220.849	3.8981
0.388067	221.139	2.8461				0.471499	221.139	6.2189				0.434112	221.139	5.0774				0.317877	221.139	10.468				0.38708	221.139	11.2992				0.382988	221.139	3.9339
0.388577	221.43	2.8048				0.472119	221.43	6.3115				0.434684	221.43	5.2171				0.318296	221.43	10.527				0.387589	221.43	11.172				0.383492	221.43	3.9284
0.389088	221.721	2.88				0.47274	221.721	6.4106				0.435255	221.721	5.2661				0.318714	221.721	10.543				0.388098	221.721	11.1708				0.383996	221.721	3.9158
0.389597	222.011	2.8867				0.473358	222.011	6.416				0.435824	222.011	5.3755				0.319131	222.011	10.425				0.388606	222.011	10.9353				0.384499	222.011	3.9082
0.390108	222.302	2.9098				0.473978	222.302	6.3329				0.436395	222.302	5.4435				0.319549	222.302	10.39				0.389115	222.302	10.839				0.385003	222.302	3.8684
0.390616	222.592	2.8201				0.474597	222.592	6.5109				0.436965	222.592	5.5058				0.319966	222.592	10.3				0.389623	222.592	11.0749				0.385505	222.592	3.9647
0.391127	222.883	2.8876				0.475217	222.883	6.4681				0.437536	222.883	5.4978				0.320384	222.883	10.223				0.390132	222.883	11.022				0.386009	222.883	3.9297
0.391638	223.174	2.8611				0.475838	223.174	6.4385				0.438107	223.174	5.6054				0.320803	223.174	10.302				0.390642	223.174	11.0106				0.386513	223.174	3.9535
0.392147	223.464	2.7879				0.476456	223.464	6.4047				0.438676	223.464	5.607				0.321219	223.464	10.288				0.391149	223.464	11.2804				0.387015	223.464	4.0155
0.392657	223.755	2.7451				0.477076	223.755	6.3502				0.439248	223.755	5.5114				0.321638	223.755	10.277				0.391659	223.755	11.5497				0.387519	223.755	4.0654
0.393166	224.045	2.8236				0.477695	224.045	6.4785				0.439817	224.045	5.5488				0.322055	224.045	10.36				0.392166	224.045	11.7864				0.388021	224.045	4.0939
0.393677	224.336	2.7775				0.478315	224.336	6.3135				0.440388	224.336	5.5384				0.322473	224.336	10.547				0.392676	224.336	12.0615				0.388525	224.336	4.2174
0.394188	224.627	2.8318				0.478936	224.627	6.3727				0.44096	224.627	5.4602				0.322891	224.627	10.733				0.393185	224.627	12.3142				0.389029	224.627	4.2103
0.394696	224.917	2.9016				0.479554	224.917	6.3072				0.441529	224.917	5.4175				0.323308	224.917	10.937				0.393693	224.917	12.51				0.389531	224.917	4.2647
0.395207	225.208	2.8492				0.480174	225.208	6.3918				0.4421	225.208	5.5759				0.323726	225.208	11.177				0.394202	225.208	12.5841				0.390035	225.208	4.1492
0.395716	225.498	2.7977				0.480793	225.498	6.4667				0.442669	225.498	5.6591				0.324143	225.498	11.37				0.39471	225.498	12.5598				0.390538	225.498	4.2033
0.396227	225.789	2.822				0.481413	225.789	6.5041				0.443241	225.789	5.5495				0.324562	225.789	11.555				0.395219	225.789	12.6431				0.391042	225.789	4.1452
0.396737	226.08	2.831				0.482034	226.08	6.6457				0.443812	226.08	5.3742				0.32498	226.08	11.693				0.395728	226.08	12.5826				0.391546	226.08	4.0803
0.397246	226.37	2.8175				0.482652	226.37	6.7195				0.444381	226.37	5.2904				0.325397	226.37	11.78				0.396236	226.37	12.5612				0.392048	226.37	4.0035
0.397757	226.661	2.888				0.483272	226.661	6.8124				0.444952	226.661	5.328				0.325815	226.661	11.888				0.396745	226.661	12.4861				0.392552	226.661	3.9026
0.398266	226.951	2.8126				0.483891	226.951	7.2386				0.445522	226.951	5.2338				0.326232	226.951	11.818				0.397253	226.951	12.5483				0.393054	226.951	3.8875
0.398777	227.242	2.8816				0.484511	227.242	7.3854				0.446093	227.242	5.1461				0.32665	227.242	11.598				0.397762	227.242	12.6456				0.393558	227.242	4.0414
0.399287	227.533	2.8098				0.485132	227.533	7.6309				0.446664	227.533	5.2767				0.327068	227.533	11.487				0.398272	227.533	12.3934				0.394062	227.533	4.0079
0.399796	227.823	2.7741				0.48575	227.823	7.8485				0.447234	227.823	5.2399				0.327485	227.823	11.48				0.398779	227.823	12.537				0.394564	227.823	4.0476
0.400307	228.114	2.7962				0.48637	228.114	8.2877				0.447805	228.114	5.2579				0.327904	228.114	11.545				0.399289	228.114	12.7425				0.395068	228.114	4.0702
0.400816	228.404	2.762				0.486989	228.404	8.3478				0.448374	228.404	5.336				0.32832	228.404	11.668				0.399796	228.404	12.9446				0.395571	228.404	4.1434
0.401326	228.695	2.6667				0.487609	228.695	8.4514				0.448945	228.695	5.4556				0.328739	228.695	11.847				0.400306	228.695	13.2599				0.396074	228.695	4.1828
0.401835	228.985	2.7966				0.488227	228.985	8.5823				0.449515	228.985	5.533				0.329156	228.985	11.93				0.400813	228.985	13.209				0.396577	228.985	4.1859
0.402346	229.276	2.7873				0.488848	229.276	8.7088				0.450086	229.276	5.6501				0.329574	229.276	11.8				0.401323	229.276	13.308				0.397081	229.276	4.0206
0.402857	229.567	2.7147				0.489468	229.567	8.5309				0.450657	229.567	5.6828				0.329992	229.567	11.542				0.401832	229.567	13.3445				0.397585	229.567	4.0535
0.403365	229.857	2.7519				0.490087	229.857	8.6998				0.451226	229.857	5.6301				0.330409	229.857	11.192				0.40234	229.857	13.3181				0.398087	229.857	4.0895
0.403876	230.148	2.8063				0.490707	230.148	8.786				0.451798	230.148	5.5736				0.330827	230.148	10.943				0.402849	230.148	13.487				0.398591	230.148	4.0422
0.404385	230.438	2.7812				0.491325	230.438	8.5512				0.452367	230.438	5.5818				0.331244	230.438	10.883				0.403357	230.438	13.6584				0.399093	230.438	4.0161
0.404896	230.729	2.7815				0.491946	230.729	8.4925				0.452938	230.729	5.6623				0.331663	230.729	10.948				0.403866	230.729	13.4344				0.399597	230.729	3.9814
0.405406	231.02	2.7774				0.492566	231.02	8.4546				0.453509	231.02	5.746				0.332081	231.02	11.198				0.404375	231.02	13.3734				0.400101	231.02	4.0255
0.405915	231.31	2.7972				0.493185	231.31	8.7231				0.454079	231.31	5.6009				0.332498	231.31	11.26				0.404883	231.31	13.2636				0.400603	231.31	4.0106
0.406426	231.601	2.776				0.493805	231.601	8.8805				0.45465	231.601	5.4553				0.332916	231.601	11.207				0.405392	231.601	12.9683				0.401107	231.601	4.1542
0.406935	231.891	2.8088				0.494423	231.891	9.1698				0.455219	231.891	5.3446				0.333333	231.891	11.227				0.4059	231.891	12.8572				0.40161	231.891	4.0589
0.407445	232.182	2.803				0.495044	232.182	9.4854				0.455791	232.182	5.2428				0.333751	232.182	11.23				0.406409	232.182	12.6533				0.402114	232.182	4.0268
0.407956	232.473	2.7535				0.495664	232.473	9.8227				0.456362	232.473	5.2017				0.334169	232.473	11.212				0.406919	232.473	12.6757				0.402618	232.473	3.9549
0.408465	232.763	2.8186				0.496283	232.763	10.1001				0.456931	232.763	5.1349				0.334586	232.763	11.125				0.407426	232.763	12.5342				0.40312	232.763	3.9299
0.408976	233.054	2.7881				0.496903	233.054	10.4689				0.457502	233.054	5.1381				0.335005	233.054	10.94				0.407936	233.054	12.7464				0.403624	233.054	3.8433
0.409485	233.344	2.7792				0.497521	233.344	10.6341				0.458072	233.344	5.0951				0.335421	233.344	10.777				0.408443	233.344	12.9101				0.404126	233.344	3.8586
0.409995	233.635	2.7254				0.498142	233.635	10.6735				0.458643	233.635	5.0471				0.33584	233.635	10.52				0.408953	233.635	12.9603				0.40463	233.635	3.9644
0.410504	233.925	2.7536				0.49876	233.925	10.3348				0.459212	233.925	4.8769				0.336257	233.925	10.167				0.40946	233.925	13.133				0.405132	233.925	3.8609
0.411015	234.216	2.7705				0.499381	234.216	9.9414				0.459783	234.216	4.8056				0.336675	234.216	9.818				0.40997	234.216	13.2872				0.405636	234.216	3.7846
0.411526	234.507	2.788				0.500001	234.507	9.909				0.460355	234.507	4.8986				0.337093	234.507	9.618				0.410479	234.507	13.2317				0.40614	234.507	3.7804
0.412034	234.797	2.8291				0.500619	234.797	9.7115				0.460924	234.797	4.8359				0.33751	234.797	9.52				0.410987	234.797	13.3776				0.406642	234.797	3.8875
0.412545	235.088	2.8447				0.50124	235.088	9.2919				0.461495	235.088	4.6592				0.337928	235.088	9.517				0.411496	235.088	13.3396				0.407146	235.088	3.9109
0.413054	235.378	2.8222				0.501858	235.378	8.9232				0.462065	235.378	4.6866				0.338345	235.378	9.68				0.412003	235.378	13.3033				0.407649	235.378	3.7879
0.413565	235.669	2.837				0.502479	235.669	8.6006				0.462636	235.669	4.7089				0.338764	235.669	9.615				0.412513	235.669	13.3653				0.408153	235.669	3.8662
0.414075	235.96	2.8207				0.503099	235.96	8.4693				0.463207	235.96	4.5694				0.339182	235.96	9.603				0.413022	235.96	13.1665				0.408657	235.96	3.9143
0.414584	236.25	2.8255				0.503717	236.25	8.3439				0.463776	236.25	4.5828				0.339599	236.25	9.692				0.41353	236.25	13.0864				0.409159	236.25	3.925
0.415095	236.541	2.7858				0.504338	236.541	8.153				0.464348	236.541	4.5852				0.340017	236.541	9.643				0.414039	236.541	12.8515				0.409663	236.541	4.0105
0.415604	236.831	2.7509				0.504956	236.831	8.0757				0.464917	236.831	4.6551				0.340434	236.831	9.543				0.414547	236.831	12.616				0.410165	236.831	3.9753
0.416114	237.122	2.7555				0.505577	237.122	7.8407				0.465488	237.122	4.7123				0.340852	237.122	9.608				0.415056	237.122	12.3809				0.410669	237.122	3.979
0.416625	237.413	2.7902				0.506197	237.413	7.5441				0.466059	237.413	4.6902				0.34127	237.413	9.74				0.415566	237.413	12.3334				0.411173	237.413	3.949
0.417134	237.703	2.7968				0.506815	237.703	7.3684				0.466629	237.703	4.6728				0.341687	237.703	9.76				0.416073	237.703	12.1279				0.411675	237.703	3.8864
0.417645	237.994	2.7992				0.507436	237.994	7.2341				0.4672	237.994	4.5403				0.342106	237.994	9.79				0.416583	237.994	12.0501				0.412179	237.994	3.8452
0.418154	238.284	2.8257				0.508054	238.284	7.1937				0.467769	238.284	4.4302				0.342523	238.284	9.938				0.41709	238.284	11.8323				0.412682	238.284	3.8087
0.418664	238.575	2.828				0.508675	238.575	7.1228				0.468341	238.575	4.3757				0.342941	238.575	10.073				0.417599	238.575	11.7711				0.413186	238.575	3.8096
0.419175	238.866	2.8393				0.509295	238.866	7.2265				0.468912	238.866	4.31				0.343359	238.866	10.153				0.418109	238.866	11.7122				0.41369	238.866	3.7881
0.419684	239.156	2.7767				0.509913	239.156	7.3657				0.469481	239.156	4.2061				0.343776	239.156	10.265				0.418616	239.156	11.4906				0.414192	239.156	3.7241
0.420195	239.447	2.7881				0.510534	239.447	7.3015				0.470052	239.447	4.1147				0.344194	239.447	10.323				0.419126	239.447	11.5096				0.414696	239.447	3.7678
0.420703	239.737	2.8134				0.511152	239.737	7.297				0.470622	239.737	4.0971				0.344611	239.737	10.405				0.419633	239.737	11.3331				0.415198	239.737	3.7287
0.421214	240.028	2.7864				0.511773	240.028	7.5092				0.471193	240.028	4.0574				0.345029	240.028	10.39				0.420143	240.028	11.1533				0.415702	240.028	3.7092
0.421723	240.318	2.6958				0.512391	240.318	7.7812				0.471762	240.318	4.1275				0.345446	240.318	10.292				0.42065	240.318	11.0608				0.416204	240.318	3.7265
0.422234	240.609	2.6859				0.513011	240.609	8.0583				0.472333	240.609	4.2396				0.345865	240.609	10.333				0.42116	240.609	11.0588				0.416708	240.609	3.7712
0.422744	240.9	2.7142				0.513632	240.9	8.3627				0.472905	240.9	4.1642				0.346283	240.9	10.347				0.421669	240.9	10.8999				0.417212	240.9	3.8529
0.423253	241.19	2.7273				0.51425	241.19	8.4103				0.473474	241.19	4.3136				0.3467	241.19	10.393				0.422177	241.19	10.8064				0.417714	241.19	3.8702
0.423764	241.481	2.7382				0.514871	241.481	8.3628				0.474045	241.481	4.4026				0.347118	241.481	10.557				0.422686	241.481	10.6764				0.418218	241.481	3.8352
0.424273	241.771	2.7638				0.515489	241.771	8.1439				0.474615	241.771	4.5097				0.347535	241.771	10.66				0.423194	241.771	10.743				0.418721	241.771	3.8231
0.424783	242.062	2.7636				0.516109	242.062	7.8508				0.475186	242.062	4.5496				0.347953	242.062	10.7				0.423703	242.062	10.6427				0.419225	242.062	3.8082
0.425294	242.353	2.7691				0.51673	242.353	7.7514				0.475757	242.353	4.5387				0.348372	242.353	10.772				0.424212	242.353	10.5715				0.419729	242.353	3.8334
0.425803	242.643	2.7817				0.517348	242.643	7.5697				0.476326	242.643	4.6268				0.348788	242.643	10.907				0.42472	242.643	10.6558				0.420231	242.643	3.7288
0.426314	242.934	2.7561				0.517969	242.934	7.5562				0.476898	242.934	4.7643				0.349207	242.934	10.907				0.425229	242.934	10.3936				0.420735	242.934	3.8548
0.426823	243.224	2.7547				0.518587	243.224	7.3025				0.477467	243.224	4.7305				0.349624	243.224	10.88				0.425737	243.224	10.3322				0.421237	243.224	3.9168
0.427333	243.515	2.7707				0.519207	243.515	7.1987				0.478038	243.515	4.6307				0.350042	243.515	10.828				0.426246	243.515	10.3133				0.421741	243.515	3.8862
0.427844	243.806	2.7796				0.519828	243.806	6.9347				0.478609	243.806	4.5331				0.35046	243.806	10.735				0.426756	243.806	10.3001				0.422245	243.806	3.9367
0.428353	244.096	2.7986				0.520446	244.096	6.6953				0.479179	244.096	4.4105				0.350877	244.096	10.79				0.427263	244.096	10.1857				0.422747	244.096	3.9458
0.428863	244.387	2.8014				0.521067	244.387	6.5976				0.47975	244.387	4.3105				0.351295	244.387	10.772				0.427773	244.387	10.2987				0.423251	244.387	3.919
0.429372	244.677	2.7404				0.521685	244.677	6.4842				0.480319	244.677	4.219				0.351712	244.677	10.727				0.42828	244.677	10.2524				0.423754	244.677	3.8375
0.429883	244.968	2.8626				0.522305	244.968	6.4562				0.48089	244.968	4.1474				0.35213	244.968	10.78				0.42879	244.968	10.21				0.424258	244.968	3.7507
0.430394	245.259	2.8501				0.522926	245.259	6.3871				0.481462	245.259	3.9611				0.352549	245.259	10.928				0.429299	245.259	10.3535				0.424762	245.259	3.8262
0.430903	245.549	2.8917				0.523544	245.549	6.2809				0.482031	245.549	3.7709				0.352966	245.549	11.218				0.429807	245.549	10.4873				0.425264	245.549	3.7817
0.431413	245.84	2.9006				0.524165	245.84	6.2213				0.482602	245.84	3.6987				0.353384	245.84	11.802				0.430316	245.84	10.4861				0.425768	245.84	3.8449
0.431922	246.13	2.9001				0.524783	246.13	6.1082				0.483172	246.13	3.6957				0.353801	246.13	12.463				0.430824	246.13	10.5652				0.42627	246.13	3.8519
0.432433	246.421	2.8922				0.525403	246.421	6.207				0.483743	246.421	3.6874				0.354219	246.421	13.033				0.431333	246.421	10.7124				0.426774	246.421	3.9358
0.432942	246.711	2.8948				0.526022	246.711	6.2819				0.484312	246.711	3.7258				0.354636	246.711	13.493				0.431841	246.711	10.828				0.427276	246.711	3.9017
0.433452	247.002	2.878				0.526642	247.002	6.4325				0.484883	247.002	3.7759				0.355054	247.002	13.768				0.43235	247.002	10.9438				0.42778	247.002	3.939
0.433963	247.293	2.9866				0.527263	247.293	6.3856				0.485455	247.293	3.7164				0.355473	247.293	13.982				0.432859	247.293	10.8747				0.428284	247.293	3.9205
0.434472	247.583	2.9309				0.527881	247.583	6.6183				0.486024	247.583	3.7604				0.355889	247.583	13.822				0.433367	247.583	10.9474				0.428786	247.583	3.9743
0.434983	247.874	2.9623				0.528501	247.874	6.6656				0.486595	247.874	3.7768				0.356308	247.874	13.512				0.433876	247.874	10.9066				0.42929	247.874	3.9045
0.435492	248.164	2.9684				0.52912	248.164	6.7164				0.487164	248.164	3.8019				0.356725	248.164	13.413				0.434384	248.164	10.9215				0.429793	248.164	3.9014
0.436002	248.455	3.0287				0.52974	248.455	6.8298				0.487736	248.455	3.7565				0.357143	248.455	13.382				0.434893	248.455	10.9435				0.430297	248.455	3.8829
0.436513	248.746	3.0088				0.530361	248.746	6.9126				0.488307	248.746	3.8014				0.357561	248.746	13.492				0.435403	248.746	10.8448				0.430801	248.746	3.8798
0.437022	249.036	3.0656				0.530979	249.036	6.838				0.488876	249.036	3.8849				0.357978	249.036	13.647				0.43591	249.036	10.8513				0.431303	249.036	3.8997
0.437532	249.327	3.1251				0.531599	249.327	6.7788				0.489447	249.327	3.8144				0.358396	249.327	13.44				0.43642	249.327	10.9654				0.431807	249.327	3.9281
0.438041	249.617	3.1984				0.532218	249.617	6.7343				0.490017	249.617	3.8463				0.358813	249.617	13.143				0.436927	249.617	11.0607				0.432309	249.617	3.8493
0.438552	249.908	3.1004				0.532838	249.908	6.5597				0.490588	249.908	3.8825				0.359231	249.908	12.993				0.437437	249.908	10.9021				0.432813	249.908	3.98
0.439063	250.199	3.1241				0.533459	250.199	6.4755				0.491159	250.199	3.9271				0.35965	250.199	12.86				0.437946	250.199	10.6511				0.433317	250.199	3.9499
0.439572	250.489	3.2304				0.534077	250.489	6.3058				0.491729	250.489	3.9496				0.360067	250.489	12.822				0.438454	250.489	10.5817				0.433819	250.489	4.061
0.440082	250.78	3.2717				0.534697	250.78	6.2861				0.4923	250.78	4.0197				0.360485	250.78	12.777				0.438963	250.78	10.4471				0.434323	250.78	4.1452
0.440591	251.07	3.287				0.535316	251.07	6.2063				0.492869	251.07	4.0602				0.360902	251.07	12.81				0.439471	251.07	10.2971				0.434826	251.07	4.2323
0.441102	251.361	3.352				0.535936	251.361	6.056				0.49344	251.361	4.1477				0.36132	251.361	12.86				0.43998	251.361	10.2505				0.43533	251.361	4.237
0.441613	251.652	3.3999				0.536557	251.652	6.1155				0.494012	251.652	4.0723				0.361738	251.652	12.905				0.440489	251.652	10.2027				0.435833	251.652	4.1691
0.442121	251.942	3.569				0.537175	251.942	6.077				0.494581	251.942	4.0128				0.362155	251.942	13.032				0.440997	251.942	10.0156				0.436336	251.942	4.1545
0.442632	252.233	3.5944				0.537795	252.233	5.875				0.495152	252.233	4.081				0.362574	252.233	13.3				0.441506	252.233	10.2854				0.43684	252.233	4.2146
0.443141	252.523	3.6808				0.538414	252.523	5.6642				0.495721	252.523	4.019				0.36299	252.523	13.467				0.442014	252.523	10.1958				0.437342	252.523	4.2095
0.443652	252.814	3.7003				0.539034	252.814	5.7163				0.496293	252.814	3.9208				0.363409	252.814	13.543				0.442523	252.814	10.1891				0.437846	252.814	4.1183
0.444161	253.104	3.8517				0.539652	253.104	5.7256				0.496862	253.104	3.873				0.363826	253.104	13.645				0.443031	253.104	10.1978				0.438348	253.104	4.0809
0.444671	253.395	4.0521				0.540273	253.395	5.568				0.497433	253.395	3.9454				0.364244	253.395	13.657				0.44354	253.395	10.3303				0.438852	253.395	4.0167
0.445182	253.686	4.1232				0.540893	253.686	5.6549				0.498005	253.686	4.1582				0.364662	253.686	13.702				0.44405	253.686	10.3918				0.439356	253.686	4.0141
0.445691	253.976	4.323				0.541512	253.976	5.4878				0.498574	253.976	4.2622				0.365079	253.976	13.605				0.444557	253.976	10.4698				0.439858	253.976	3.9368
0.446201	254.267	4.6048				0.542132	254.267	5.4992				0.499145	254.267	4.2582				0.365497	254.267	13.387				0.445067	254.267	10.5045				0.440362	254.267	4.0688
0.44671	254.557	4.8506				0.54275	254.557	5.5718				0.499714	254.557	4.3716				0.365914	254.557	13.32				0.445574	254.557	10.5186				0.440865	254.557	3.9872
0.447221	254.848	5.194				0.543371	254.848	5.4776				0.500286	254.848	4.3674				0.366333	254.848	13.283				0.446084	254.848	10.6057				0.441369	254.848	3.9648
0.447732	255.139	5.1958				0.543991	255.139	5.389				0.500857	255.139	4.3134				0.366751	255.139	13.203				0.446593	255.139	10.4463				0.441873	255.139	3.9562
0.448241	255.429	5.1858				0.54461	255.429	5.4034				0.501426	255.429	4.213				0.367168	255.429	13.233				0.447101	255.429	10.2734				0.442375	255.429	3.8787
0.448751	255.72	5.1955				0.54523	255.72	5.3389				0.501997	255.72	4.126				0.367586	255.72	13.102				0.44761	255.72	10.2203				0.442879	255.72	3.8102
0.44926	256.01	5.1901				0.545848	256.01	5.413				0.502567	256.01	4.078				0.368003	256.01	12.982				0.448118	256.01	10.1584				0.443381	256.01	3.8827
0.449771	256.301	5.1285				0.546469	256.301	5.3516				0.503138	256.301	3.9105				0.368421	256.301	13.1				0.448627	256.301	10.0619				0.443885	256.301	3.8461
0.450281	256.592	4.9596				0.547089	256.592	5.4638				0.503709	256.592	3.8174				0.368839	256.592	13.197				0.449136	256.592	9.9899				0.444389	256.592	3.8302
0.45079	256.882	4.8858				0.547708	256.882	5.5145				0.504279	256.882	3.7799				0.369256	256.882	13.253				0.449644	256.882	9.972				0.444891	256.882	3.9146
0.451301	257.173	4.7408				0.548328	257.173	5.4844				0.50485	257.173	3.8788				0.369675	257.173	13.153				0.450153	257.173	10.1094				0.445395	257.173	3.9453
0.45181	257.463	4.7589				0.548946	257.463	5.5072				0.505419	257.463	3.7857				0.370091	257.463	13.18				0.450661	257.463	9.9414				0.445897	257.463	3.8977
0.452321	257.754	4.6065				0.549567	257.754	5.5985				0.50599	257.754	3.8202				0.37051	257.754	13.398				0.45117	257.754	9.6916				0.446401	257.754	4.0579
0.452831	258.045	4.5488				0.550187	258.045	5.6415				0.506562	258.045	3.7969				0.370928	258.045	13.19				0.45168	258.045	9.8333				0.446905	258.045	4.2002
0.45334	258.335	4.3872				0.550806	258.335	5.8281				0.507131	258.335	3.7623				0.371345	258.335	13.005				0.452187	258.335	9.8152				0.447408	258.335	4.188
0.453851	258.626	4.4621				0.551426	258.626	5.9085				0.507702	258.626	3.8662				0.371763	258.626	13.128				0.452697	258.626	9.968				0.447912	258.626	4.1017
0.45436	258.916	4.3419				0.552044	258.916	5.8007				0.508271	258.916	3.919				0.37218	258.916	13.26				0.453204	258.916	9.9813				0.448414	258.916	4.0385
0.45487	259.207	4.3468				0.552665	259.207	5.7039				0.508843	259.207	3.9266				0.372598	259.207	13.448				0.453714	259.207	10.1696				0.448918	259.207	4.0872
0.455379	259.497	4.2875				0.553283	259.497	5.8037				0.509412	259.497	4.0408				0.373015	259.497	13.448				0.454221	259.497	10.2948				0.44942	259.497	4.155
0.45589	259.788	4.3477				0.553904	259.788	5.8908				0.509983	259.788	4.2074				0.373434	259.788	13.523				0.454731	259.788	10.2353				0.449924	259.788	4.0196
0.456401	260.079	4.3333				0.554524	260.079	5.994				0.510554	260.079	4.3011				0.373852	260.079	13.637				0.45524	260.079	10.4021				0.450428	260.079	4.0956
0.45691	260.369	4.3332				0.555142	260.369	6.0602				0.511124	260.369	4.4308				0.374269	260.369	13.518				0.455747	260.369	10.5681				0.45093	260.369	4.0185
0.45742	260.66	4.3507				0.555763	260.66	6.0511				0.511695	260.66	4.6317				0.374687	260.66	13.372				0.456257	260.66	10.4525				0.451434	260.66	4.1107
0.457929	260.95	4.4779				0.556381	260.95	5.8528				0.512264	260.95	4.7651				0.375104	260.95	13.29				0.456764	260.95	10.5286				0.451937	260.95	4.0762
0.45844	261.241	4.4761				0.557002	261.241	5.8091				0.512836	261.241	4.7854				0.375522	261.241	13.238				0.457274	261.241	10.5661				0.452441	261.241	4.0725
0.45895	261.532	4.544				0.557622	261.532	5.7284				0.513407	261.532	4.7188				0.37594	261.532	12.953				0.457783	261.532	10.4818				0.452945	261.532	4.068
0.459459	261.822	4.6428				0.55824	261.822	5.6661				0.513976	261.822	4.4641				0.376357	261.822	12.605				0.458291	261.822	10.4039				0.453447	261.822	4.1114
0.45997	262.113	4.6144				0.558861	262.113	5.5523				0.514547	262.113	4.3592				0.376776	262.113	12.388				0.4588	262.113	10.2887				0.453951	262.113	4.1808
0.460479	262.403	4.6371				0.559479	262.403	5.5346				0.515117	262.403	4.2328				0.377192	262.403	12.248				0.459308	262.403	10.2011				0.454453	262.403	4.1888
0.46099	262.694	4.7518				0.5601	262.694	5.2126				0.515688	262.694	4.2028				0.377611	262.694	12.227				0.459817	262.694	10.4511				0.454957	262.694	4.2683
0.4615	262.985	4.5756				0.56072	262.985	5.0658				0.516259	262.985	4.1648				0.378029	262.985	12.425				0.460327	262.985	10.2319				0.455461	262.985	4.3231
0.462009	263.275	4.4637				0.561338	263.275	4.8349				0.516828	263.275	4.1397				0.378446	263.275	12.792				0.460834	263.275	10.1918				0.455963	263.275	4.4336
0.46252	263.566	4.3748				0.561959	263.566	4.6502				0.5174	263.566	4.1494				0.378864	263.566	13.053				0.461343	263.566	10.0716				0.456467	263.566	4.4335
0.463029	263.856	4.1168				0.562577	263.856	4.5848				0.517969	263.856	3.9906				0.379281	263.856	13.002				0.461851	263.856	9.9595				0.456969	263.856	4.5991
0.463539	264.147	3.9773				0.563198	264.147	4.5262				0.51854	264.147	4.0069				0.379699	264.147	13.002				0.46236	264.147	9.9088				0.457473	264.147	4.5692
0.46405	264.438	3.7748				0.563818	264.438	4.4828				0.519112	264.438	3.9847				0.380118	264.438	12.973				0.46287	264.438	9.6894				0.457977	264.438	4.4333
0.464559	264.728	3.5929				0.564436	264.728	4.4073				0.519681	264.728	4.1366				0.380535	264.728	12.78				0.463377	264.728	9.6494				0.45848	264.728	4.442
0.46507	265.019	3.4367				0.565057	265.019	4.3821				0.520252	265.019	4.2338				0.380953	265.019	12.735				0.463887	265.019	9.7097				0.458984	265.019	4.4604
0.465579	265.309	3.3634				0.565675	265.309	4.3256				0.520821	265.309	4.2313				0.38137	265.309	12.747				0.464394	265.309	9.7018				0.459486	265.309	4.5649
0.466089	265.6	3.2806				0.566296	265.6	4.3105				0.521393	265.6	4.2119				0.381788	265.6	12.788				0.464904	265.6	9.6968				0.45999	265.6	4.5291
0.466598	265.89	3.1977				0.566914	265.89	4.269				0.521962	265.89	4.2844				0.382205	265.89	12.902				0.465411	265.89	9.9161				0.460492	265.89	4.4957
0.467109	266.181	3.1637				0.567534	266.181	4.1167				0.522533	266.181	4.2296				0.382623	266.181	13.138				0.465921	266.181	9.7021				0.460996	266.181	4.4961
0.467619	266.472	3.1963				0.568155	266.472	4.1617				0.523104	266.472	4.1281				0.383041	266.472	13.498				0.46643	266.472	9.7281				0.4615	266.472	4.5252
0.468128	266.762	3.1628				0.568773	266.762	4.1649				0.523674	266.762	4.1152				0.383458	266.762	13.683				0.466938	266.762	9.7859				0.462002	266.762	4.5445
0.468639	267.053	3.1508				0.569394	267.053	4.0922				0.524245	267.053	3.9125				0.383877	267.053	13.773				0.467447	267.053	9.8113				0.462506	267.053	4.4615
0.469148	267.343	3.2681				0.570012	267.343	4.1014				0.524814	267.343	3.919				0.384294	267.343	13.653				0.467955	267.343	9.8702				0.463009	267.343	4.3139
0.469659	267.634	3.209				0.570632	267.634	4.0665				0.525385	267.634	3.8998				0.384712	267.634	13.298				0.468464	267.634	9.8132				0.463513	267.634	4.3495
0.470169	267.925	3.2596				0.571253	267.925	4.1143				0.525957	267.925	3.8911				0.38513	267.925	13.153				0.468973	267.925	9.8693				0.464017	267.925	4.4409
0.470678	268.215	3.2421				0.571871	268.215	4.0888				0.526526	268.215	3.8459				0.385547	268.215	13.108				0.469481	268.215	10.0254				0.464519	268.215	4.3804
0.471189	268.506	3.1591				0.572492	268.506	4.1102				0.527097	268.506	3.9196				0.385965	268.506	12.87				0.46999	268.506	10.0933				0.465023	268.506	4.4677
0.471698	268.796	3.2135				0.57311	268.796	4.0674				0.527667	268.796	3.9212				0.386382	268.796	12.653				0.470498	268.796	10.1216				0.465525	268.796	4.473
0.472208	269.087	3.1433				0.57373	269.087	4.1617				0.528238	269.087	3.917				0.3868	269.087	12.488				0.471007	269.087	10.187				0.466029	269.087	4.4548
0.472719	269.378	3.1292				0.574351	269.378	4.1517				0.528809	269.378	3.9032				0.387219	269.378	12.085				0.471517	269.378	10.0929				0.466533	269.378	4.608
0.473228	269.668	3.1104				0.574969	269.668	4.1508				0.529378	269.668	3.9118				0.387636	269.668	11.793				0.472024	269.668	10.1325				0.467035	269.668	4.5628
0.473739	269.959	3.1077				0.57559	269.959	4.1455				0.52995	269.959	3.8948				0.388054	269.959	11.9				0.472534	269.959	10.2195				0.467539	269.959	4.6535
0.474248	270.249	3.0757				0.576208	270.249	4.0966				0.530519	270.249	3.9063				0.388471	270.249	11.838				0.473041	270.249	10.2635				0.468041	270.249	4.6744
0.474758	270.54	3.0124				0.576828	270.54	4.0858				0.53109	270.54	3.8578				0.388889	270.54	11.655				0.473551	270.54	10.0858				0.468545	270.54	4.7571
0.475269	270.831	2.9994				0.577449	270.831	4.0534				0.531661	270.831	3.8307				0.389307	270.831	11.805				0.47406	270.831	10.3375				0.469049	270.831	4.6782
0.475778	271.121	3.0641				0.578067	271.121	4.0677				0.532231	271.121	3.8661				0.389724	271.121	11.762				0.474568	271.121	10.2183				0.469552	271.121	4.6392
0.476288	271.412	3.0352				0.578688	271.412	4.0744				0.532802	271.412	3.8294				0.390143	271.412	11.575				0.475077	271.412	10.0369				0.470056	271.412	4.5271
0.476797	271.702	3.0555				0.579306	271.702	4.0721				0.533371	271.702	3.7784				0.390559	271.702	11.538				0.475585	271.702	9.8952				0.470558	271.702	4.4312
0.477308	271.993	3.0284				0.579926	271.993	4.0601				0.533943	271.993	3.6253				0.390978	271.993	11.562				0.476094	271.993	9.8842				0.471062	271.993	4.4133
0.477817	272.283	3.0466				0.580545	272.283	4.0666				0.534512	272.283	3.7063				0.391395	272.283	11.515				0.476602	272.283	9.7424				0.471564	272.283	4.439
0.478328	272.574	2.9779				0.581165	272.574	4.0819				0.535083	272.574	3.661				0.391813	272.574	11.552				0.477111	272.574	9.7678				0.472068	272.574	4.3745
0.478838	272.865	2.9815				0.581786	272.865	4.0903				0.535654	272.865	3.5936				0.392231	272.865	11.595				0.47762	272.865	9.5806				0.472572	272.865	4.4821
0.479347	273.155	2.9517				0.582404	273.155	4.0863				0.536224	273.155	3.5914				0.392648	273.155	11.508				0.478128	273.155	9.6803				0.473074	273.155	4.3319
0.479858	273.446	2.9745				0.583024	273.446	4.0328				0.536795	273.446	3.6329				0.393066	273.446	11.468				0.478637	273.446	9.8209				0.473578	273.446	4.3147
0.480367	273.736	2.9538				0.583643	273.736	4.1271				0.537364	273.736	3.5882				0.393483	273.736	11.382				0.479145	273.736	9.9652				0.474081	273.736	4.2238
0.480877	274.027	2.9373				0.584263	274.027	4.1487				0.537935	274.027	3.5963				0.393901	274.027	11.092				0.479654	274.027	9.9056				0.474585	274.027	4.1416
0.481388	274.318	2.9148				0.584884	274.318	4.192				0.538507	274.318	3.57				0.39432	274.318	11.01				0.480164	274.318	9.6689				0.475088	274.318	4.104
0.481897	274.608	2.9157				0.585502	274.608	4.2082				0.539076	274.608	3.5738				0.394737	274.608	11.083				0.480671	274.608	9.8017				0.475591	274.608	4.0389
0.482408	274.899	2.9467				0.586122	274.899	4.2633				0.539647	274.899	3.5412				0.395155	274.899	10.962				0.481181	274.899	9.8184				0.476095	274.899	4.1077
0.482916	275.189	2.9411				0.586741	275.189	4.3178				0.540217	275.189	3.4686				0.395572	275.189	10.953				0.481688	275.189	9.9675				0.476597	275.189	4.142
0.483427	275.48	2.9609				0.587361	275.48	4.2613				0.540788	275.48	3.5035				0.39599	275.48	10.888				0.482198	275.48	9.6674				0.477101	275.48	4.0724
0.483938	275.771	3.0468				0.587982	275.771	4.2984				0.541359	275.771	3.4881				0.396408	275.771	10.775				0.482707	275.771	9.6353				0.477605	275.771	4.0615
0.484447	276.061	3.0401				0.5886	276.061	4.3517				0.541928	276.061	3.5178				0.396825	276.061	10.843				0.483215	276.061	9.4951				0.478107	276.061	4.0043
0.484957	276.352	3.1718				0.58922	276.352	4.3289				0.5425	276.352	3.5226				0.397244	276.352	10.828				0.483724	276.352	9.3747				0.478611	276.352	3.9335
0.485466	276.642	3.2896				0.589839	276.642	4.3046				0.543069	276.642	3.4762				0.39766	276.642	10.822				0.484232	276.642	9.2873				0.479113	276.642	3.9382
0.485977	276.933	3.3826				0.590459	276.933	4.325				0.54364	276.933	3.4674				0.398079	276.933	10.805				0.484741	276.933	9.3202				0.479617	276.933	3.9504
0.486488	277.224	3.5184				0.59108	277.224	4.3064				0.544211	277.224	3.4494				0.398497	277.224	10.763				0.48525	277.224	9.2296				0.480121	277.224	3.9735
0.486997	277.514	3.5581				0.591698	277.514	4.363				0.544781	277.514	3.4135				0.398914	277.514	10.878				0.485758	277.514	9.1912				0.480624	277.514	3.9642
0.487507	277.805	3.6156				0.592318	277.805	4.3814				0.545352	277.805	3.4221				0.399332	277.805	10.925				0.486267	277.805	9.376				0.481128	277.805	3.973
0.488016	278.095	3.6626				0.592937	278.095	4.3819				0.545921	278.095	3.4639				0.399749	278.095	10.947				0.486775	278.095	9.4461				0.48163	278.095	4.0398
0.488527	278.386	3.6186				0.593557	278.386	4.4635				0.546492	278.386	3.502				0.400167	278.386	10.96				0.487284	278.386	9.4785				0.482134	278.386	3.963
0.489036	278.676	3.4494				0.594175	278.676	4.3935				0.547062	278.676	3.5192				0.400584	278.676	10.913				0.487792	278.676	9.5778				0.482636	278.676	3.839
0.489546	278.967	3.3836				0.594796	278.967	4.2828				0.547633	278.967	3.4599				0.401002	278.967	10.822				0.488301	278.967	9.6659				0.48314	278.967	3.8396
0.490057	279.258	3.2051				0.595416	279.258	4.3202				0.548204	279.258	3.4409				0.401421	279.258	10.69				0.488811	279.258	9.8143				0.483644	279.258	3.9146
0.490566	279.548	3.1334				0.596035	279.548	4.288				0.548774	279.548	3.6058				0.401838	279.548	10.645				0.489318	279.548	9.8103				0.484146	279.548	3.923
0.491077	279.839	3.104				0.596655	279.839	4.2464				0.549345	279.839	3.6651				0.402256	279.839	10.652				0.489828	279.839	9.7786				0.48465	279.839	3.9289
0.491585	280.129	3.0234				0.597273	280.129	4.2389				0.549914	280.129	3.7361				0.402673	280.129	10.64				0.490335	280.129	9.7297				0.485153	280.129	3.8666
0.492096	280.42	3.0162				0.597894	280.42	4.3216				0.550485	280.42	3.6534				0.403091	280.42	10.732				0.490845	280.42	9.5574				0.485656	280.42	3.7441
0.492607	280.711	3.1026				0.598514	280.711	4.3182				0.551057	280.711	3.6643				0.403509	280.711	10.878				0.491354	280.711	9.5393				0.48616	280.711	3.7209
0.493116	281.001	3.0231				0.599133	281.001	4.3511				0.551626	281.001	3.6942				0.403926	281.001	10.882				0.491862	281.001	9.6139				0.486663	281.001	3.6625
0.493626	281.292	3.0793				0.599753	281.292	4.4323				0.552197	281.292	3.7733				0.404345	281.292	10.863				0.492371	281.292	9.5284				0.487167	281.292	3.754
0.494135	281.582	3.1152				0.600371	281.582	4.4721				0.552766	281.582	3.6681				0.404761	281.582	11.068				0.492879	281.582	9.5585				0.487669	281.582	3.707
0.494646	281.873	3.0573				0.600992	281.873	4.4834				0.553338	281.873	3.6654				0.40518	281.873	11.217				0.493388	281.873	9.6489				0.488173	281.873	3.8054
0.495157	282.164	3.0657				0.601612	282.164	4.5535				0.553909	282.164	3.6901				0.405598	282.164	11.128				0.493897	282.164	9.9836				0.488677	282.164	3.7408
0.495666	282.454	3.0902				0.602231	282.454	4.4943				0.554478	282.454	3.6498				0.406015	282.454	11.042				0.494405	282.454	10.0822				0.489179	282.454	3.7431
0.496176	282.745	3.1026				0.602851	282.745	4.3683				0.55505	282.745	3.6269				0.406433	282.745	10.93				0.494914	282.745	10.0391				0.489683	282.745	3.8093
0.496685	283.035	3.0238				0.603469	283.035	4.4005				0.555619	283.035	3.5981				0.40685	283.035	10.778				0.495422	283.035	10.1403				0.490185	283.035	3.7176
0.497196	283.326	3.0438				0.60409	283.326	4.2997				0.55619	283.326	3.607				0.407268	283.326	10.647				0.495931	283.326	10.3479				0.490689	283.326	3.7056
0.497705	283.616	2.9595				0.604708	283.616	4.2867				0.556759	283.616	3.5839				0.407685	283.616	10.627				0.496439	283.616	10.7341				0.491192	283.616	3.684
0.498215	283.907	2.9203				0.605329	283.907	4.2274				0.557331	283.907	3.6157				0.408104	283.907	10.602				0.496948	283.907	10.9535				0.491696	283.907	3.7024
0.498726	284.198	3.0292				0.605949	284.198	4.2343				0.557902	284.198	3.6122				0.408522	284.198	10.415				0.497458	284.198	11.0518				0.4922	284.198	3.6486
0.499235	284.488	3.0652				0.606567	284.488	4.2489				0.558471	284.488	3.6362				0.408939	284.488	10.292				0.497965	284.488	11.2028				0.492702	284.488	3.6419
0.499746	284.779	3.0728				0.607188	284.779	4.3495				0.559042	284.779	3.6791				0.409357	284.779	10.275				0.498475	284.779	11.3516				0.493206	284.779	3.6723
0.500254	285.069	2.997				0.607806	285.069	4.3389				0.559612	285.069	3.6425				0.409774	285.069	10.303				0.498982	285.069	11.5343				0.493708	285.069	3.5966
0.500765	285.36	3.1101				0.608427	285.36	4.4011				0.560183	285.36	3.7637				0.410192	285.36	10.252				0.499492	285.36	11.7189				0.494212	285.36	3.6241
0.501276	285.651	3.1609				0.609047	285.651	4.3792				0.560754	285.651	3.7515				0.41061	285.651	10.225				0.500001	285.651	12.0791				0.494716	285.651	3.58
0.501785	285.941	3.1096				0.609665	285.941	4.4456				0.561324	285.941	3.6594				0.411027	285.941	10.438				0.500508	285.941	12.0814				0.495218	285.941	3.5452
0.502295	286.232	3.1348				0.610286	286.232	4.4278				0.561895	286.232	3.6857				0.411446	286.232	10.555				0.501018	286.232	12.0641				0.495722	286.232	3.5966
0.502804	286.522	3.1816				0.610904	286.522	4.4464				0.562464	286.522	3.6709				0.411862	286.522	10.513				0.501525	286.522	11.9563				0.496224	286.522	3.6531
0.503315	286.813	3.1872				0.611525	286.813	4.4926				0.563035	286.813	3.732				0.412281	286.813	10.5				0.502035	286.813	11.6866				0.496728	286.813	3.6397
0.503826	287.104	3.2894				0.612145	287.104	4.508				0.563607	287.104	3.6391				0.412699	287.104	10.615				0.502544	287.104	11.4551				0.497232	287.104	3.6675
0.504334	287.394	3.3978				0.612763	287.394	4.4099				0.564176	287.394	3.6453				0.413116	287.394	10.775				0.503052	287.394	11.5104				0.497735	287.394	3.7272
0.504845	287.685	3.366				0.613384	287.685	4.5187				0.564747	287.685	3.7591				0.413534	287.685	10.865				0.503561	287.685	11.36				0.498239	287.685	3.744
0.505354	287.975	3.4282				0.614002	287.975	4.5161				0.565316	287.975	3.7034				0.413951	287.975	10.907				0.504069	287.975	11.3009				0.498741	287.975	3.7307
0.505865	288.266	3.4743				0.614623	288.266	4.3729				0.565888	288.266	3.6812				0.414369	288.266	10.848				0.504578	288.266	11.2547				0.499245	288.266	3.8579
0.506375	288.557	3.5648				0.615243	288.557	4.4264				0.566459	288.557	3.6653				0.414788	288.557	10.662				0.505088	288.557	11.4572				0.499749	288.557	3.8053
0.506884	288.847	3.5365				0.615861	288.847	4.473				0.567028	288.847	3.6796				0.415205	288.847	10.405				0.505595	288.847	11.566				0.500251	288.847	3.7524
0.507395	289.138	3.5313				0.616482	289.138	4.4512				0.567599	289.138	3.7337				0.415623	289.138	10.203				0.506104	289.138	11.5144				0.500755	289.138	3.7295
0.507904	289.428	3.6195				0.6171	289.428	4.4731				0.568169	289.428	3.7108				0.41604	289.428	10.05				0.506612	289.428	11.5359				0.501257	289.428	3.8093
0.508415	289.719	3.5724				0.617721	289.719	4.4754				0.56874	289.719	3.7893				0.416458	289.719	9.977				0.507121	289.719	11.5174				0.501761	289.719	3.8192
0.508923	290.009	3.5337				0.618339	290.009	4.5714				0.569309	290.009	3.7516				0.416875	290.009	9.97				0.507629	290.009	11.4846				0.502264	290.009	3.805
0.509434	290.3	3.5234				0.618959	290.3	4.6377				0.569881	290.3	3.823				0.417293	290.3	9.945				0.508138	290.3	11.7594				0.502768	290.3	3.8701
0.509945	290.591	3.4991				0.61958	290.591	4.8271				0.570452	290.591	3.9182				0.417711	290.591	9.985				0.508648	290.591	11.8026				0.503272	290.591	3.8198
0.510454	290.881	3.518				0.620198	290.881	4.9103				0.571021	290.881	4.0254				0.418128	290.881	10.153				0.509155	290.881	11.8407				0.503774	290.881	3.8728
0.510964	291.172	3.5045				0.620819	291.172	4.9682				0.571592	291.172	4.0785				0.418547	291.172	10.162				0.509665	291.172	11.6041				0.504278	291.172	3.872
0.511473	291.462	3.4824				0.621437	291.462	4.9985				0.572162	291.462	4.194				0.418963	291.462	9.93				0.510172	291.462	11.5256				0.50478	291.462	3.8661
0.511984	291.753	3.4676				0.622057	291.753	5.0725				0.572733	291.753	4.1345				0.419382	291.753	9.837				0.510682	291.753	11.3269				0.505284	291.753	3.7313
0.512495	292.044	3.4124				0.622678	292.044	4.9148				0.573304	292.044	4.3263				0.4198	292.044	9.838				0.511191	292.044	11.4618				0.505788	292.044	3.7646
0.513003	292.334	3.4156				0.623296	292.334	4.8371				0.573873	292.334	4.4525				0.420217	292.334	9.793				0.511699	292.334	11.6581				0.50629	292.334	3.7954
0.513514	292.625	3.3551				0.623917	292.625	4.7991				0.574445	292.625	4.4645				0.420635	292.625	9.857				0.512208	292.625	12.1184				0.506794	292.625	3.7664
0.514023	292.915	3.302				0.624535	292.915	4.752				0.575014	292.915	4.5361				0.421052	292.915	9.88				0.512716	292.915	12.2286				0.507296	292.915	3.7872
0.514534	293.206	3.2861				0.625155	293.206	4.5544				0.575585	293.206	4.4305				0.42147	293.206	9.83				0.513225	293.206	12.4483				0.5078	293.206	3.7417
0.515044	293.497	3.251				0.625776	293.497	4.6545				0.576156	293.497	4.5013				0.421889	293.497	9.91				0.513734	293.497	12.6757				0.508304	293.497	3.7507
0.515553	293.787	3.1232				0.626394	293.787	4.5849				0.576726	293.787	4.5124				0.422306	293.787	9.99				0.514242	293.787	12.9923				0.508807	293.787	3.7943
0.516064	294.078	3.1333				0.627015	294.078	4.6635				0.577297	294.078	4.4462				0.422724	294.078	10.057				0.514751	294.078	13.2678				0.509311	294.078	3.9007
0.516573	294.368	3.1178				0.627633	294.368	4.7424				0.577866	294.368	4.6328				0.423141	294.368	10.198				0.515259	294.368	13.5222				0.509813	294.368	3.8678
0.517084	294.659	3.0682				0.628253	294.659	4.7582				0.578438	294.659	4.6946				0.423559	294.659	10.217				0.515768	294.659	14.0804				0.510317	294.659	3.8019
0.517594	294.95	3.072				0.628874	294.95	4.748				0.579009	294.95	4.567				0.423977	294.95	10.145				0.516278	294.95	14.4609				0.510821	294.95	3.8134
0.518103	295.24	3.192				0.629492	295.24	4.7338				0.579578	295.24	4.5285				0.424394	295.24	10.107				0.516785	295.24	15.0241				0.511323	295.24	3.775
0.518614	295.531	3.1774				0.630113	295.531	4.773				0.580149	295.531	4.4132				0.424812	295.531	10.12				0.517295	295.531	15.4167				0.511827	295.531	3.8685
0.519123	295.821	3.1591				0.630731	295.821	4.7811				0.580719	295.821	4.2596				0.425229	295.821	10.157				0.517802	295.821	15.7156				0.512329	295.821	3.8886
0.519633	296.112	3.1483				0.631351	296.112	4.7313				0.58129	296.112	4.2495				0.425648	296.112	10.17				0.518312	296.112	15.601				0.512833	296.112	3.9529
0.520142	296.402	3.2289				0.63197	296.402	4.7326				0.581859	296.402	4.1852				0.426065	296.402	10.213				0.518819	296.402	15.3604				0.513336	296.402	3.9084
0.520653	296.693	3.1783				0.63259	296.693	4.7104				0.58243	296.693	4.1333				0.426483	296.693	10.262				0.519329	296.693	14.7038				0.51384	296.693	3.9332
0.521164	296.984	3.117				0.633211	296.984	4.6483				0.583002	296.984	4.1264				0.426901	296.984	10.26				0.519838	296.984	14.0376				0.514344	296.984	4.0171
0.521672	297.274	3.1779				0.633829	297.274	4.5814				0.583571	297.274	4.2638				0.427318	297.274	10.135				0.520346	297.274	13.5275				0.514846	297.274	3.9329
0.522183	297.565	3.1268				0.634449	297.565	4.569				0.584142	297.565	4.2202				0.427736	297.565	9.933				0.520855	297.565	13.205				0.51535	297.565	4.0165
0.522692	297.855	3.0805				0.635068	297.855	4.5732				0.584712	297.855	4.2723				0.428153	297.855	9.823				0.521363	297.855	12.8989				0.515852	297.855	4.044
0.523203	298.146	3.0269				0.635688	298.146	4.718				0.585283	298.146	4.2596				0.428571	298.146	9.833				0.521872	298.146	12.8459				0.516356	298.146	4.1453
0.523713	298.437	3.115				0.636309	298.437	4.6027				0.585854	298.437	4.2605				0.42899	298.437	9.753				0.522381	298.437	12.9277				0.51686	298.437	4.1429
0.524222	298.727	3.1408				0.636927	298.727	4.5844				0.586423	298.727	4.3423				0.429407	298.727	9.582				0.522889	298.727	12.9047				0.517362	298.727	4.2416
0.524733	299.018	3.0745				0.637547	299.018	4.6617				0.586995	299.018	4.2659				0.429825	299.018	9.515				0.523398	299.018	12.9499				0.517866	299.018	4.3654
0.525242	299.308	3.0611				0.638166	299.308	4.6675				0.587564	299.308	4.3709				0.430242	299.308	9.502				0.523906	299.308	12.9071				0.518368	299.308	4.3896
0.525752	299.599	3.1154				0.638786	299.599	4.6875				0.588135	299.599	4.2991				0.43066	299.599	9.552				0.524415	299.599	12.7704				0.518872	299.599	4.3426
0.526263	299.89	3.1254				0.639407	299.89	4.8342				0.588706	299.89	4.2999				0.431078	299.89	9.653				0.524925	299.89	12.7232				0.519376	299.89	4.3968
0.526772	300.18	3.035				0.640025	300.18	4.8344				0.589276	300.18	4.3667				0.431495	300.18	9.757				0.525432	300.18	12.4459				0.519879	300.18	4.4584
0.527283	300.471	3.004				0.640645	300.471	4.7893				0.589847	300.471	4.3962				0.431914	300.471	9.953				0.525942	300.471	12.2342				0.520383	300.471	4.3804
0.527792	300.761	3.0303				0.641264	300.761	4.7313				0.590416	300.761	4.5852				0.43233	300.761	10.092				0.526449	300.761	12.1071				0.520885	300.761	4.366
0.528302	301.052	3.003				0.641884	301.052	4.8039				0.590988	301.052	4.6912				0.432749	301.052	9.997				0.526959	301.052	12.1239				0.521389	301.052	4.3865
0.528813	301.343	3.0296				0.642505	301.343	4.6628				0.591559	301.343	4.7721				0.433167	301.343	9.963				0.527468	301.343	12.0198				0.521893	301.343	4.39
0.529322	301.633	3.0371				0.643123	301.633	4.6357				0.592128	301.633	4.8215				0.433584	301.633	10.003				0.527976	301.633	12.0601				0.522395	301.633	4.2522
0.529833	301.924	3.0216				0.643743	301.924	4.6633				0.592699	301.924	4.7668				0.434002	301.924	10.013				0.528485	301.924	12.0126				0.522899	301.924	4.1957
0.530341	302.214	3.0196				0.644362	302.214	4.5988				0.593269	302.214	4.9716				0.434419	302.214	9.995				0.528993	302.214	11.8543				0.523401	302.214	4.2279
0.530852	302.505	2.9896				0.644982	302.505	4.5796				0.59384	302.505	4.9408				0.434837	302.505	10.088				0.529502	302.505	11.4503				0.523905	302.505	4.2418
0.531361	302.795	3.0077				0.6456	302.795	4.6751				0.594409	302.795	4.9294				0.435254	302.795	9.983				0.53001	302.795	11.4045				0.524408	302.795	4.0336
0.531872	303.086	3.0045				0.646221	303.086	4.6214				0.59498	303.086	5.0155				0.435672	303.086	9.832				0.530519	303.086	11.2842				0.524912	303.086	3.9604
0.532382	303.377	2.9934				0.646841	303.377	4.7039				0.595552	303.377	5.0695				0.436091	303.377	9.862				0.531028	303.377	10.9259				0.525415	303.377	3.9781
0.532891	303.667	3.0491				0.64746	303.667	4.5594				0.596121	303.667	5.3199				0.436508	303.667	9.91				0.531536	303.667	10.6587				0.525918	303.667	3.9906
0.533402	303.958	3.1119				0.64808	303.958	4.5647				0.596692	303.958	5.5077				0.436926	303.958	9.887				0.532045	303.958	10.3963				0.526422	303.958	3.9923
0.533911	304.248	3.0775				0.648698	304.248	4.3641				0.597262	304.248	5.6407				0.437343	304.248	9.727				0.532553	304.248	10.6257				0.526924	304.248	3.922
0.534421	304.539	3.166				0.649319	304.539	4.2706				0.597833	304.539	5.8445				0.437761	304.539	9.698				0.533062	304.539	10.8289				0.527428	304.539	3.9133
0.534932	304.83	3.1282				0.649939	304.83	4.1841				0.598404	304.83	5.7896				0.438179	304.83	9.765				0.533572	304.83	10.6914				0.527932	304.83	3.9403
0.535441	305.12	3.1712				0.650558	305.12	4.1617				0.598973	305.12	5.8638				0.438596	305.12	9.848				0.534079	305.12	10.7889				0.528434	305.12	3.8837
0.535952	305.411	3.1819				0.651178	305.411	4.1347				0.599545	305.411	5.8036				0.439015	305.411	9.823				0.534589	305.411	10.6345				0.528938	305.411	3.8612
0.536461	305.701	3.1562				0.651796	305.701	4.1931				0.600114	305.701	5.7083				0.439431	305.701	9.755				0.535096	305.701	10.681				0.52944	305.701	3.9198
0.536971	305.992	3.1554				0.652417	305.992	4.1303				0.600685	305.992	5.7365				0.43985	305.992	9.675				0.535606	305.992	10.4957				0.529944	305.992	3.952
0.537482	306.283	3.1788				0.653037	306.283	4.2323				0.601256	306.283	5.6445				0.440268	306.283	9.657				0.536115	306.283	10.3599				0.530448	306.283	3.8847
0.537991	306.573	3.1028				0.653656	306.573	4.2993				0.601826	306.573	5.5825				0.440685	306.573	9.607				0.536623	306.573	10.4733				0.530951	306.573	3.9621
0.538501	306.864	3.1182				0.654276	306.864	4.3159				0.602397	306.864	5.7078				0.441103	306.864	9.507				0.537132	306.864	10.4495				0.531455	306.864	3.9187
0.53901	307.154	3.1901				0.654894	307.154	4.3206				0.602966	307.154	5.5791				0.44152	307.154	9.49				0.53764	307.154	10.6602				0.531957	307.154	3.9993
0.539521	307.445	3.2427				0.655515	307.445	4.311				0.603537	307.445	5.393				0.441938	307.445	9.44				0.538149	307.445	10.6985				0.532461	307.445	3.9329
0.540032	307.736	3.2379				0.656135	307.736	4.4013				0.604109	307.736	5.3307				0.442357	307.736	9.395				0.538658	307.736	10.7589				0.532965	307.736	3.9197
0.540541	308.026	3.3384				0.656754	308.026	4.4086				0.604678	308.026	5.3034				0.442773	308.026	9.51				0.539166	308.026	10.9198				0.533467	308.026	3.9101
0.541051	308.317	3.3424				0.657374	308.317	4.3317				0.605249	308.317	5.2974				0.443192	308.317	9.497				0.539675	308.317	10.8822				0.533971	308.317	3.8926
0.54156	308.607	3.2887				0.657992	308.607	4.2984				0.605819	308.607	5.2748				0.443609	308.607	9.445				0.540183	308.607	10.8674				0.534473	308.607	3.8763
0.542071	308.898	3.3229				0.658613	308.898	4.3929				0.60639	308.898	5.2638				0.444027	308.898	9.48				0.540692	308.898	11.0136				0.534977	308.898	3.9041
0.54258	309.188	3.3843				0.659231	309.188	4.3323				0.606959	309.188	5.3164				0.444444	309.188	9.352				0.5412	309.188	10.9686				0.535479	309.188	3.8479
0.54309	309.479	3.3104				0.659852	309.479	4.3187				0.60753	309.479	5.3231				0.444862	309.479	9.28				0.541709	309.479	10.9413				0.535983	309.479	3.772
0.543601	309.77	3.3941				0.660472	309.77	4.3757				0.608102	309.77	5.2597				0.44528	309.77	9.225				0.542219	309.77	10.9787				0.536487	309.77	3.7651
0.54411	310.06	3.4186				0.66109	310.06	4.3445				0.608671	310.06	5.1925				0.445697	310.06	9.105				0.542726	310.06	10.9891				0.53699	310.06	3.7501
0.544621	310.351	3.4799				0.661711	310.351	4.2731				0.609242	310.351	5.0928				0.446116	310.351	9.07				0.543236	310.351	11.0576				0.537494	310.351	3.758
0.54513	310.641	3.4585				0.662329	310.641	4.3399				0.609811	310.641	5.1375				0.446532	310.641	9.088				0.543743	310.641	10.911				0.537996	310.641	3.7382
0.54564	310.932	3.4815				0.66295	310.932	4.3035				0.610383	310.932	5.3073				0.446951	310.932	9.053				0.544253	310.932	10.9881				0.5385	310.932	3.6917
0.546151	311.223	3.5655				0.66357	311.223	4.3611				0.610954	311.223	5.4637				0.447369	311.223	9.035				0.544762	311.223	11.0345				0.539004	311.223	3.626
0.54666	311.513	3.5151				0.664188	311.513	4.3749				0.611523	311.513	5.5875				0.447786	311.513	9.138				0.545269	311.513	10.8772				0.539506	311.513	3.625
0.54717	311.804	3.4805				0.664809	311.804	4.5108				0.612095	311.804	5.7619				0.448204	311.804	9.257				0.545779	311.804	10.9457				0.54001	311.804	3.6429
0.547679	312.094	3.5259				0.665427	312.094	4.5621				0.612664	312.094	5.8207				0.448621	312.094	9.343				0.546286	312.094	11.1508				0.540512	312.094	3.5497
0.54819	312.385	3.5377				0.666048	312.385	4.6001				0.613235	312.385	5.8123				0.449039	312.385	9.465				0.546796	312.385	11.208				0.541016	312.385	3.6345
0.548701	312.676	3.6476				0.666668	312.676	4.51				0.613806	312.676	5.8138				0.449458	312.676	9.598				0.547305	312.676	11.283				0.54152	312.676	3.637
0.54921	312.966	3.6814				0.667286	312.966	4.4632				0.614376	312.966	5.7595				0.449875	312.966	9.65				0.547813	312.966	11.3369				0.542023	312.966	3.6283
0.54972	313.257	3.6794				0.667907	313.257	4.5103				0.614947	313.257	5.7132				0.450293	313.257	9.617				0.548322	313.257	11.4984				0.542527	313.257	3.6546
0.550229	313.547	3.7857				0.668525	313.547	4.4585				0.615516	313.547	5.702				0.45071	313.547	9.583				0.54883	313.547	11.2708				0.543029	313.547	3.7037
0.55074	313.838	3.7143				0.669146	313.838	4.4236				0.616087	313.838	5.7076				0.451128	313.838	9.562				0.549339	313.838	11.0252				0.543533	313.838	3.7003
0.551251	314.129	3.6828				0.669766	314.129	4.3867				0.616659	314.129	5.559				0.451546	314.129	9.507				0.549849	314.129	11.2154				0.544037	314.129	3.7076
0.551759	314.419	3.6463				0.670384	314.419	4.3192				0.617228	314.419	5.4288				0.451963	314.419	9.568				0.550356	314.419	11.2441				0.544539	314.419	3.7178
0.55227	314.71	3.6701				0.671005	314.71	4.3249				0.617799	314.71	5.4282				0.452381	314.71	9.618				0.550865	314.71	11.4467				0.545043	314.71	3.7154
0.552779	315	3.6284				0.671623	315	4.4044				0.618368	315	5.4608				0.452798	315	9.6				0.551373	315	11.5026				0.545545	315	3.6971
0.55329	315.291	3.7773				0.672244	315.291	4.4159				0.61894	315.291	5.3003				0.453217	315.291	9.767				0.551882	315.291	11.6601				0.546049	315.291	3.6756
0.553799	315.581	3.7585				0.672862	315.581	4.4411				0.619509	315.581	5.3168				0.453633	315.581	9.962				0.55239	315.581	12.1735				0.546551	315.581	3.7622
0.554309	315.872	3.7947				0.673482	315.872	4.4152				0.62008	315.872	5.3516				0.454052	315.872	10.04				0.552899	315.872	12.4205				0.547055	315.872	3.6946
0.55482	316.163	3.8364				0.674103	316.163	4.4581				0.620652	316.163	5.3858				0.45447	316.163	10.077				0.553409	316.163	12.7594				0.547559	316.163	3.6811
0.555329	316.453	3.7281				0.674721	316.453	4.418				0.621221	316.453	5.4224				0.454887	316.453	10.152				0.553916	316.453	13.1982				0.548062	316.453	3.7129
0.555839	316.744	3.7398				0.675342	316.744	4.3599				0.621792	316.744	5.4703				0.455305	316.744	10.197				0.554426	316.744	13.2283				0.548566	316.744	3.6718
0.556348	317.034	3.7737				0.67596	317.034	4.3506				0.622361	317.034	5.6583				0.455722	317.034	10.067				0.554933	317.034	13.4221				0.549068	317.034	3.6702
0.556859	317.325	3.6598				0.67658	317.325	4.2079				0.622933	317.325	5.504				0.45614	317.325	9.888				0.555443	317.325	13.5393				0.549572	317.325	3.7325
0.55737	317.616	3.6421				0.677201	317.616	4.2762				0.623504	317.616	5.3527				0.456559	317.616	9.727				0.555952	317.616	13.4078				0.550076	317.616	3.7368
0.557879	317.906	3.5898				0.677819	317.906	4.1647				0.624073	317.906	5.1054				0.456976	317.906	9.595				0.55646	317.906	13.4613				0.550578	317.906	3.7823
0.558389	318.197	3.5251				0.67844	318.197	4.0571				0.624644	318.197	5.0951				0.457394	318.197	9.5				0.556969	318.197	13.6263				0.551082	318.197	3.8091
0.558898	318.487	3.4705				0.679058	318.487	4.1111				0.625214	318.487	5.1728				0.457811	318.487	9.312				0.557477	318.487	13.7468				0.551584	318.487	3.8234
0.559409	318.778	3.542				0.679678	318.778	4.1973				0.625785	318.778	5.0596				0.458229	318.778	9.25				0.557986	318.778	13.563				0.552088	318.778	3.7575
0.559919	319.069	3.5837				0.680299	319.069	4.094				0.626356	319.069	5.0219				0.458647	319.069	9.283				0.558495	319.069	13.7659				0.552592	319.069	3.6562
0.560428	319.359	3.5705				0.680917	319.359	4.0793				0.626926	319.359	4.922				0.459064	319.359	9.182				0.559003	319.359	14.0458				0.553095	319.359	3.63
0.560939	319.65	3.5068				0.681538	319.65	4.0564				0.627497	319.65	4.8428				0.459482	319.65	9.09				0.559512	319.65	14.1253				0.553599	319.65	3.6488
0.561448	319.94	3.4495				0.682156	319.94	3.9735				0.628066	319.94	4.7937				0.459899	319.94	9.04				0.56002	319.94	14.6173				0.554101	319.94	3.6851
0.561959	320.231	3.4525				0.682776	320.231	3.9188				0.628637	320.231	4.8301				0.460318	320.231	9.087				0.560529	320.231	14.9588				0.554605	320.231	3.6571
0.562469	320.522	3.4742				0.683397	320.522	3.8261				0.629209	320.522	4.7053				0.460736	320.522	9.163				0.561039	320.522	15.1559				0.555109	320.522	3.7066
0.562978	320.812	3.4991				0.684015	320.812	3.97				0.629778	320.812	4.6143				0.461153	320.812	9.122				0.561546	320.812	15.5938				0.555611	320.812	3.7101
0.563489	321.103	3.5084				0.684636	321.103	3.927				0.630349	321.103	4.6119				0.461571	321.103	9.017				0.562056	321.103	15.3954				0.556115	321.103	3.6494
0.563998	321.393	3.4897				0.685254	321.393	3.924				0.630918	321.393	4.6056				0.461988	321.393	8.973				0.562563	321.393	15.3372				0.556617	321.393	3.6479
0.564508	321.684	3.4386				0.685874	321.684	3.9484				0.63149	321.684	4.55				0.462406	321.684	8.925				0.563073	321.684	15.0959				0.557121	321.684	3.6401
0.565017	321.974	3.5117				0.686493	321.974	3.9689				0.632059	321.974	4.5272				0.462823	321.974	8.717				0.56358	321.974	15.0055				0.557623	321.974	3.6583
0.565528	322.265	3.479				0.687113	322.265	4.0262				0.63263	322.265	4.5069				0.463241	322.265	8.495				0.56409	322.265	14.9486				0.558127	322.265	3.7034
0.566039	322.556	3.4488				0.687734	322.556	3.9926				0.633201	322.556	4.4924				0.46366	322.556	8.355				0.564599	322.556	14.9293				0.558631	322.556	3.7298
0.566548	322.846	3.4199				0.688352	322.846	3.8795				0.633771	322.846	4.4373				0.464077	322.846	8.322				0.565107	322.846	15.0429				0.559134	322.846	3.764
0.567058	323.137	3.427				0.688972	323.137	3.9252				0.634342	323.137	4.4397				0.464495	323.137	8.35				0.565616	323.137	14.9206				0.559638	323.137	3.7886
0.567567	323.427	3.3698				0.689591	323.427	3.8756				0.634911	323.427	4.4156				0.464912	323.427	8.347				0.566124	323.427	14.8199				0.56014	323.427	3.7433
0.568078	323.718	3.3537				0.690211	323.718	3.9431				0.635483	323.718	4.5114				0.46533	323.718	8.183				0.566633	323.718	14.8554				0.560644	323.718	3.8744
0.568588	324.009	3.2889				0.690832	324.009	3.8641				0.636054	324.009	4.5399				0.465748	324.009	8.242				0.567142	324.009	15.1076				0.561148	324.009	3.8892
0.569097	324.299	3.3273				0.69145	324.299	3.8185				0.636623	324.299	4.5627				0.466165	324.299	8.365				0.56765	324.299	14.978				0.56165	324.299	3.8664
0.569608	324.59	3.3807				0.69207	324.59	3.9062				0.637194	324.59	4.4306				0.466583	324.59	8.273				0.568159	324.59	14.8661				0.562154	324.59	3.895
0.570117	324.88	3.3378				0.692689	324.88	3.8191				0.637764	324.88	4.3784				0.467	324.88	8.247				0.568667	324.88	14.834				0.562656	324.88	3.888
0.570628	325.171	3.3154				0.693309	325.171	3.72				0.638335	325.171	4.3694				0.467419	325.171	8.308				0.569176	325.171	14.5753				0.56316	325.171	3.8575
0.571138	325.462	3.2723				0.69393	325.462	3.8771				0.638906	325.462	4.2499				0.467837	325.462	8.388				0.569686	325.462	14.6758				0.563664	325.462	3.9301
0.571647	325.752	3.3219				0.694548	325.752	3.9003				0.639475	325.752	4.1919				0.468254	325.752	8.287				0.570193	325.752	14.3206				0.564167	325.752	3.9203
0.572158	326.043	3.3675				0.695168	326.043	3.9741				0.640047	326.043	4.0749				0.468672	326.043	8.207				0.570703	326.043	14.2772				0.56467	326.043	3.9506
0.572667	326.333	3.4713				0.695787	326.333	4.0095				0.640616	326.333	4.0306				0.469089	326.333	8.292				0.57121	326.333	13.9194				0.565173	326.333	3.9273
0.573177	326.624	3.4328				0.696407	326.624	3.9622				0.641187	326.624	3.8931				0.469507	326.624	8.312				0.57172	326.624	13.4905				0.565677	326.624	3.8769
0.573686	326.914	3.4453				0.697025	326.914	3.9186				0.641757	326.914	3.7934				0.469924	326.914	8.15				0.572227	326.914	13.2371				0.566179	326.914	3.9168
0.574197	327.205	3.4625				0.697646	327.205	4.0246				0.642328	327.205	3.7849				0.470342	327.205	7.99				0.572737	327.205	12.9863				0.566683	327.205	3.8958
0.574708	327.496	3.4337				0.698266	327.496	3.8986				0.642899	327.496	3.7959				0.470761	327.496	8.007				0.573246	327.496	12.8172				0.567187	327.496	3.83
0.575217	327.786	3.539				0.698885	327.786	3.9803				0.643468	327.786	3.729				0.471178	327.786	8.07				0.573754	327.786	12.579				0.567689	327.786	3.9047
0.575727	328.077	3.5107				0.699505	328.077	3.9487				0.64404	328.077	3.6761				0.471596	328.077	7.995				0.574263	328.077	12.5603				0.568193	328.077	3.8841
0.576236	328.367	3.5154				0.700123	328.367	3.8612				0.644609	328.367	3.6958				0.472013	328.367	7.88				0.574771	328.367	12.4488				0.568695	328.367	3.9543
0.576747	328.658	3.5367				0.700744	328.658	3.8514				0.64518	328.658	3.7084				0.472431	328.658	7.812				0.57528	328.658	12.3238				0.569199	328.658	3.9578
0.577257	328.949	3.5769				0.701364	328.949	3.8084				0.645751	328.949	3.636				0.472849	328.949	7.707				0.575789	328.949	12.0776				0.569703	328.949	3.908
0.577766	329.239	3.5292				0.701983	329.239	3.868				0.646321	329.239	3.5551				0.473266	329.239	7.583				0.576297	329.239	11.8441				0.570206	329.239	3.8873
0.578277	329.53	3.6126				0.702603	329.53	3.8338				0.646892	329.53	3.475				0.473685	329.53	7.493				0.576806	329.53	11.657				0.57071	329.53	3.9412
0.578786	329.82	3.4571				0.703221	329.82	3.7595				0.647461	329.82	3.4524				0.474101	329.82	7.45				0.577314	329.82	11.4896				0.571212	329.82	3.9315
0.579297	330.111	3.4713				0.703842	330.111	3.7803				0.648033	330.111	3.4582				0.47452	330.111	7.39				0.577823	330.111	11.332				0.571716	330.111	3.914
0.579807	330.402	3.461				0.704462	330.402	3.8245				0.648604	330.402	3.4684				0.474938	330.402	7.322				0.578333	330.402	11.0652				0.57222	330.402	3.9861
0.580316	330.692	3.5533				0.705081	330.692	3.8343				0.649173	330.692	3.4295				0.475355	330.692	7.32				0.57884	330.692	10.9954				0.572722	330.692	3.9716
0.580827	330.983	3.6182				0.705701	330.983	3.8096				0.649744	330.983	3.5075				0.475773	330.983	7.288				0.57935	330.983	11.049				0.573226	330.983	4.001
0.581336	331.273	3.5884				0.706319	331.273	3.7856				0.650314	331.273	3.5083				0.47619	331.273	7.255				0.579857	331.273	11.1946				0.573728	331.273	3.964
0.581846	331.564	3.591				0.70694	331.564	3.846				0.650885	331.564	3.5093				0.476608	331.564	7.278				0.580367	331.564	11.4009				0.574232	331.564	3.9008
0.582357	331.855	3.575				0.70756	331.855	3.8671				0.651456	331.855	3.4999				0.477027	331.855	7.302				0.580876	331.855	11.4905				0.574736	331.855	3.9081
0.582866	332.145	3.6033				0.708179	332.145	3.8018				0.652025	332.145	3.4637				0.477443	332.145	7.348				0.581384	332.145	11.3812				0.575238	332.145	3.99
0.583377	332.436	3.6335				0.708799	332.436	3.8649				0.652597	332.436	3.4318				0.477862	332.436	7.377				0.581893	332.436	11.5347				0.575742	332.436	3.9399
0.583886	332.726	3.5886				0.709417	332.726	3.8521				0.653166	332.726	3.4746				0.478279	332.726	7.273				0.582401	332.726	11.5441				0.576245	332.726	3.8548
0.584396	333.017	3.6338				0.710038	333.017	3.8604				0.653737	333.017	3.4092				0.478697	333.017	7.255				0.58291	333.017	11.7293				0.576749	333.017	3.8957
0.584905	333.307	3.6082				0.710656	333.307	3.7536				0.654306	333.307	3.3972				0.479114	333.307	7.338				0.583417	333.307	11.6452				0.577251	333.307	3.9008
0.585416	333.598	3.632				0.711277	333.598	3.8251				0.654878	333.598	3.3457				0.479532	333.598	7.348				0.583927	333.598	11.717				0.577755	333.598	3.908
0.585926	333.889	3.5824				0.711897	333.889	3.6677				0.655449	333.889	3.2793				0.47995	333.889	7.342				0.584436	333.889	11.428				0.578259	333.889	3.9042
0.586435	334.179	3.5981				0.712515	334.179	3.6979				0.656018	334.179	3.3228				0.480367	334.179	7.377				0.584944	334.179	11.4805				0.578761	334.179	3.7979
0.586946	334.47	3.484				0.713136	334.47	3.7106				0.65659	334.47	3.2908				0.480786	334.47	7.485				0.585453	334.47	11.5577				0.579265	334.47	3.8496
0.587455	334.76	3.4545				0.713754	334.76	3.7399				0.657159	334.76	3.2465				0.481202	334.76	7.587				0.585961	334.76	11.5414				0.579767	334.76	3.8928
0.587966	335.051	3.5635				0.714375	335.051	3.7742				0.65773	335.051	3.2554				0.481621	335.051	7.6				0.58647	335.051	11.4526				0.580271	335.051	3.9825
0.588476	335.342	3.5975				0.714995	335.342	3.7793				0.658301	335.342	3.3087				0.482039	335.342	7.482				0.58698	335.342	11.3521				0.580775	335.342	3.899
0.588985	335.632	3.5308				0.715613	335.632	3.7701				0.658871	335.632	3.2667				0.482456	335.632	7.362				0.587487	335.632	11.1388				0.581278	335.632	3.8352
0.589496	335.923	3.5674				0.716234	335.923	3.7529				0.659442	335.923	3.3046				0.482874	335.923	7.405				0.587997	335.923	11.1804				0.581782	335.923	3.8418
0.590005	336.213	3.5442				0.716852	336.213	3.8079				0.660011	336.213	3.4306				0.483291	336.213	7.463				0.588504	336.213	11.233				0.582284	336.213	3.8743
0.590515	336.504	3.506				0.717473	336.504	3.7362				0.660582	336.504	3.4153				0.483709	336.504	7.488				0.589013	336.504	11.2232				0.582788	336.504	3.8804
0.591026	336.795	3.5427				0.718093	336.795	3.8001				0.661154	336.795	3.4856				0.484128	336.795	7.503				0.589523	336.795	11.1912				0.583292	336.795	4.01
0.591535	337.085	3.5862				0.718711	337.085	3.8025				0.661723	337.085	3.5033				0.484544	337.085	7.467				0.59003	337.085	11.5548				0.583794	337.085	4.0954
0.592046	337.376	3.4914				0.719332	337.376	3.7857				0.662294	337.376	3.6385				0.484963	337.376	7.493				0.59054	337.376	11.793				0.584298	337.376	4.1479
0.592555	337.666	3.5671				0.71995	337.666	3.7707				0.662864	337.666	3.6817				0.48538	337.666	7.558				0.591047	337.666	11.704				0.5848	337.666	4.0621
0.593065	337.957	3.6338				0.720571	337.957	3.794				0.663435	337.957	3.5467				0.485798	337.957	7.497				0.591557	337.957	11.6563				0.585304	337.957	4.0485
0.593576	338.248	3.6067				0.721191	338.248	3.7821				0.664006	338.248	3.6452				0.486216	338.248	7.423				0.592066	338.248	11.7784				0.585808	338.248	4.0163
0.594085	338.538	3.5259				0.721809	338.538	3.9286				0.664575	338.538	3.5955				0.486633	338.538	7.417				0.592574	338.538	11.9511				0.58631	338.538	4.0017
0.594595	338.829	3.5178				0.72243	338.829	3.8822				0.665147	338.829	3.5465				0.487051	338.829	7.43				0.593083	338.829	11.8743				0.586814	338.829	3.9722
0.595104	339.119	3.4942				0.723048	339.119	3.935				0.665716	339.119	3.4685				0.487468	339.119	7.397				0.593591	339.119	11.8646				0.587317	339.119	4.0003
0.595615	339.41	3.4433				0.723669	339.41	3.8915				0.666287	339.41	3.4675				0.487887	339.41	7.312				0.5941	339.41	11.9442				0.587821	339.41	4.0296
0.596126	339.701	3.4862				0.724289	339.701	3.9097				0.666858	339.701	3.451				0.488305	339.701	7.353				0.594609	339.701	12.1204				0.588325	339.701	4.016
0.596635	339.991	3.5279				0.724907	339.991	3.8046				0.667428	339.991	3.4644				0.488722	339.991	7.398				0.595117	339.991	12.3				0.588827	339.991	3.9618
0.597145	340.282	3.4615				0.725528	340.282	3.8921				0.667999	340.282	3.4022				0.48914	340.282	7.405				0.595626	340.282	12.2316				0.589331	340.282	3.9811
0.597654	340.572	3.4136				0.726146	340.572	3.9838				0.668568	340.572	3.4823				0.489557	340.572	7.457				0.596134	340.572	12.4612				0.589833	340.572	4.002
0.598165	340.863	3.4308				0.726767	340.863	3.7969				0.669139	340.863	3.4445				0.489975	340.863	7.468				0.596643	340.863	12.493				0.590337	340.863	4.0324
0.598674	341.153	3.3873				0.727385	341.153	3.9319				0.669709	341.153	3.3895				0.490392	341.153	7.42				0.597151	341.153	12.515				0.590839	341.153	3.9957
0.599184	341.444	3.4242				0.728005	341.444	3.9642				0.67028	341.444	3.3786				0.49081	341.444	7.407				0.59766	341.444	12.2301				0.591343	341.444	3.9503
0.599695	341.735	3.3737				0.728626	341.735	4.0421				0.670851	341.735	3.3347				0.491229	341.735	7.495				0.59817	341.735	11.9278				0.591847	341.735	3.8803
0.600204	342.025	3.3667				0.729244	342.025	4.082				0.671421	342.025	3.3605				0.491646	342.025	7.582				0.598677	342.025	11.9221				0.59235	342.025	3.8824
0.600715	342.316	3.4197				0.729865	342.316	4.0085				0.671992	342.316	3.3367				0.492064	342.316	7.603				0.599187	342.316	12.0537				0.592854	342.316	3.8809
0.601223	342.606	3.3466				0.730483	342.606	4.0618				0.672561	342.606	3.3902				0.492481	342.606	7.623				0.599694	342.606	11.897				0.593356	342.606	3.8656
0.601734	342.897	3.4302				0.731103	342.897	4.1168				0.673132	342.897	3.3616				0.492899	342.897	7.623				0.600204	342.897	11.906				0.59386	342.897	3.8083
0.602245	343.188	3.4591				0.731724	343.188	4.1937				0.673704	343.188	3.3199				0.493317	343.188	7.653				0.600713	343.188	11.9134				0.594364	343.188	3.7488
0.602754	343.478	3.3846				0.732342	343.478	4.2335				0.674273	343.478	3.3175				0.493734	343.478	7.668				0.601221	343.478	12.021				0.594866	343.478	3.7615
0.603264	343.769	3.406				0.732963	343.769	4.3511				0.674844	343.769	3.2912				0.494152	343.769	7.568				0.60173	343.769	11.8524				0.59537	343.769	3.7057
0.603773	344.059	3.4604				0.733581	344.059	4.3381				0.675413	344.059	3.3925				0.494569	344.059	7.602				0.602238	344.059	11.9608				0.595872	344.059	3.6939
0.604284	344.35	3.4203				0.734201	344.35	4.2916				0.675985	344.35	3.4022				0.494988	344.35	7.695				0.602747	344.35	11.7798				0.596376	344.35	3.6771
0.604795	344.641	3.4611				0.734822	344.641	4.4137				0.676556	344.641	3.3396				0.495406	344.641	7.682				0.603256	344.641	11.693				0.59688	344.641	3.7362
0.605304	344.931	3.4798				0.73544	344.931	4.4283				0.677125	344.931	3.5106				0.495823	344.931	7.63				0.603764	344.931	11.7419				0.597382	344.931	3.762
0.605814	345.222	3.5152				0.736061	345.222	4.366				0.677697	345.222	3.5913				0.496241	345.222	7.663				0.604273	345.222	11.72				0.597886	345.222	3.7694
0.606323	345.512	3.4118				0.736679	345.512	4.4498				0.678266	345.512	3.6924				0.496658	345.512	7.755				0.604781	345.512	11.7017				0.598389	345.512	3.7367
0.606834	345.803	3.4812				0.737299	345.803	4.4177				0.678837	345.803	3.7456				0.497076	345.803	7.815				0.60529	345.803	11.5413				0.598893	345.803	3.7651
0.607343	346.093	3.4791				0.737918	346.093	4.4587				0.679406	346.093	3.8024				0.497493	346.093	7.88				0.605798	346.093	11.5805				0.599395	346.093	3.7703
0.607853	346.384	3.5017				0.738538	346.384	4.5224				0.679978	346.384	3.8387				0.497911	346.384	7.888				0.606307	346.384	11.4943				0.599899	346.384	3.6782
0.608364	346.675	3.4908				0.739159	346.675	4.6445				0.680549	346.675	3.851				0.49833	346.675	7.967				0.606817	346.675	11.5082				0.600403	346.675	3.767
0.608873	346.965	3.4438				0.739777	346.965	4.5962				0.681118	346.965	3.9379				0.498747	346.965	8.02				0.607324	346.965	11.5224				0.600905	346.965	3.848
0.609384	347.256	3.4863				0.740397	347.256	4.6857				0.681689	347.256	3.9637				0.499165	347.256	7.973				0.607834	347.256	11.4271				0.601409	347.256	3.7473
0.609892	347.546	3.4758				0.741016	347.546	4.6881				0.682259	347.546	3.9665				0.499582	347.546	8.002				0.608341	347.546	11.6398				0.601911	347.546	3.7655
0.610403	347.837	3.5801				0.741636	347.837	4.7312				0.68283	347.837	3.8703				0.5	347.837	8.01				0.608851	347.837	11.6025				0.602415	347.837	3.8283
0.610914	348.128	3.6247				0.742257	348.128	4.7029				0.683401	348.128	3.9105				0.500418	348.128	7.95				0.60936	348.128	11.6453				0.602919	348.128	3.8764
0.611423	348.418	3.701				0.742875	348.418	4.7198				0.683971	348.418	3.859				0.500835	348.418	7.892				0.609868	348.418	11.8611				0.603422	348.418	3.8484
0.611933	348.709	3.7637				0.743495	348.709	4.6498				0.684542	348.709	3.6865				0.501253	348.709	7.817				0.610377	348.709	11.6705				0.603926	348.709	3.818
0.612442	348.999	3.7662				0.744114	348.999	4.6452				0.685111	348.999	3.6525				0.50167	348.999	7.785				0.610885	348.999	11.4384				0.604428	348.999	3.8434
0.612953	349.29	3.773				0.744734	349.29	4.7794				0.685682	349.29	3.623				0.502089	349.29	7.788				0.611394	349.29	11.1036				0.604932	349.29	3.9206
0.613464	349.581	3.7881				0.745355	349.581	4.7567				0.686254	349.581	3.64				0.502507	349.581	7.74				0.611903	349.581	10.9723				0.605436	349.581	3.8907
0.613972	349.871	3.7945				0.745973	349.871	4.7091				0.686823	349.871	3.7083				0.502924	349.871	7.702				0.612411	349.871	10.9845				0.605938	349.871	3.9608
0.614483	350.162	3.8488				0.746593	350.162	4.7562				0.687394	350.162	3.7422				0.503342	350.162	7.712				0.61292	350.162	10.8427				0.606442	350.162	4.0079
0.614992	350.452	3.7786				0.747212	350.452	4.8143				0.687963	350.452	3.7239				0.503759	350.452	7.747				0.613428	350.452	11.0462				0.606944	350.452	3.9974
0.615503	350.743	3.883				0.747832	350.743	4.793				0.688535	350.743	3.6974				0.504177	350.743	7.69				0.613937	350.743	11.1557				0.607448	350.743	4.0816
0.616013	351.034	3.973				0.748453	351.034	4.7706				0.689106	351.034	3.7253				0.504596	351.034	7.602				0.614447	351.034	10.9854				0.607952	351.034	4.1962
0.616522	351.324	3.9872				0.749071	351.324	4.7175				0.689675	351.324	3.7602				0.505012	351.324	7.647				0.614954	351.324	11.1529				0.608454	351.324	4.2443
0.617033	351.615	4.0527				0.749691	351.615	4.7489				0.690246	351.615	3.7775				0.505431	351.615	7.758				0.615464	351.615	11.1009				0.608958	351.615	4.3268
0.617542	351.905	4.1856				0.75031	351.905	4.7518				0.690816	351.905	3.7101				0.505848	351.905	7.892				0.615971	351.905	11.2134				0.609461	351.905	4.3796
0.618053	352.196	4.2014				0.75093	352.196	4.7199				0.691387	352.196	3.7033				0.506266	352.196	8.007				0.616481	352.196	11.4106				0.609965	352.196	4.4653
0.618561	352.486	4.1006				0.751548	352.486	4.6023				0.691956	352.486	3.7323				0.506683	352.486	8.052				0.616988	352.486	11.5009				0.610467	352.486	4.4777
0.619072	352.777	4.0778				0.752169	352.777	4.643				0.692528	352.777	3.7555				0.507101	352.777	7.998				0.617498	352.777	11.6201				0.610971	352.777	4.3695
0.619583	353.068	4.0355				0.752789	353.068	4.6878				0.693099	353.068	3.6809				0.507519	353.068	7.947				0.618007	353.068	11.8086				0.611475	353.068	4.3036
0.620092	353.358	3.9624				0.753408	353.358	4.69				0.693668	353.358	3.6467				0.507936	353.358	7.907				0.618515	353.358	11.6126				0.611977	353.358	4.3068
0.620602	353.649	4.0014				0.754028	353.649	4.7125				0.694239	353.649	3.5796				0.508354	353.649	7.908				0.619024	353.649	11.6275				0.612481	353.649	4.3782
0.621111	353.939	3.995				0.754646	353.939	4.7313				0.694809	353.939	3.5874				0.508771	353.939	8.022				0.619532	353.939	11.7851				0.612983	353.939	4.321
0.621622	354.23	4.0562				0.755267	354.23	4.7666				0.69538	354.23	3.4273				0.50919	354.23	8.123				0.620041	354.23	11.6758				0.613487	354.23	4.3739
0.622133	354.521	4.0418				0.755887	354.521	4.671				0.695951	354.521	3.4267				0.509608	354.521	8.125				0.62055	354.521	11.5185				0.613991	354.521	4.3654
0.622641	354.811	4.1515				0.756506	354.811	4.7107				0.69652	354.811	3.4924				0.510025	354.811	8.075				0.621058	354.811	11.6122				0.614493	354.811	4.3224
0.623152	355.102	4.2767				0.757126	355.102	4.6986				0.697092	355.102	3.4343				0.510443	355.102	8.03				0.621567	355.102	11.5319				0.614997	355.102	4.4401
0.623661	355.392	4.2787				0.757744	355.392	4.682				0.697661	355.392	3.451				0.51086	355.392	8.033				0.622075	355.392	11.4947				0.6155	355.392	4.5664
0.624172	355.683	4.3611				0.758365	355.683	4.7617				0.698232	355.683	3.4941				0.511278	355.683	8.043				0.622584	355.683	11.4703				0.616004	355.683	4.5988
0.624682	355.974	4.3975				0.758985	355.974	4.7648				0.698804	355.974	3.4857				0.511697	355.974	7.962				0.623094	355.974	11.5136				0.616508	355.974	4.5402
0.625191	356.264	4.4465				0.759604	356.264	4.8464				0.699373	356.264	3.5039				0.512113	356.264	7.702				0.623601	356.264	11.4429				0.61701	356.264	4.5307
0.625702	356.555	4.3687				0.760224	356.555	4.897				0.699944	356.555	3.5707				0.512532	356.555	7.462				0.624111	356.555	11.6631				0.617514	356.555	4.5135
0.626211	356.845	4.2803				0.760842	356.845	4.9796				0.700513	356.845	3.6089				0.512949	356.845	7.498				0.624618	356.845	11.6133				0.618016	356.845	4.4002
0.626722	357.136	4.2115				0.761463	357.136	4.9854				0.701085	357.136	3.5963				0.513367	357.136	7.593				0.625128	357.136	11.5613				0.61852	357.136	4.4193
0.627232	357.427	4.1819				0.762083	357.427	5.0131				0.701656	357.427	3.6407				0.513785	357.427	7.525				0.625637	357.427	11.5953				0.619024	357.427	4.5531
0.627741	357.717	4.1957				0.762702	357.717	5.1669				0.702225	357.717	3.6039				0.514202	357.717	7.52				0.626145	357.717	11.6905				0.619526	357.717	4.6586
0.628252	358.008	4.0756				0.763322	358.008	5.0476				0.702796	358.008	3.6513				0.51462	358.008	7.668				0.626654	358.008	11.7145				0.62003	358.008	4.785
0.628761	358.298	4.0168				0.76394	358.298	4.8949				0.703366	358.298	3.6351				0.515037	358.298	7.777				0.627162	358.298	11.7466				0.620533	358.298	4.9339
0.629271	358.589	3.9922				0.764561	358.589	4.8268				0.703937	358.589	3.65				0.515456	358.589	7.843				0.627671	358.589	11.6294				0.621037	358.589	5.2288
0.62978	358.879	3.9011				0.765179	358.879	4.7157				0.704506	358.879	3.6558				0.515872	358.879	7.917				0.628178	358.879	11.7913				0.621539	358.879	5.3215
0.630291	359.17	3.821				0.7658	359.17	4.7523				0.705077	359.17	3.5968				0.516291	359.17	8.015				0.628688	359.17	11.6923				0.622043	359.17	5.4049
0.630802	359.461	3.7965				0.76642	359.461	4.725				0.705649	359.461	3.5976				0.516709	359.461	7.987				0.629197	359.461	11.8241				0.622547	359.461	5.4994
0.63131	359.751	3.8382				0.767038	359.751	4.6385				0.706218	359.751	3.5816				0.517126	359.751	8.022				0.629705	359.751	11.9923				0.623049	359.751	5.6195
0.631821	360.042	3.8279				0.767659	360.042	4.6986				0.706789	360.042	3.4779				0.517544	360.042	7.993				0.630214	360.042	12.0117				0.623553	360.042	5.7139
0.63233	360.332	3.7049				0.768277	360.332	4.7855				0.707359	360.332	3.4633				0.517961	360.332	7.927				0.630722	360.332	12.1015				0.624055	360.332	5.798
0.632841	360.623	3.6803				0.768898	360.623	4.756				0.70793	360.623	3.5364				0.518379	360.623	7.915				0.631231	360.623	12.1664				0.624559	360.623	5.6138
0.633351	360.914	3.7297				0.769518	360.914	4.9607				0.708501	360.914	3.5608				0.518798	360.914	7.875				0.631741	360.914	12.1012				0.625063	360.914	5.561
0.63386	361.204	3.6998				0.770136	361.204	5.0179				0.70907	361.204	3.693				0.519214	361.204	7.9				0.632248	361.204	11.9969				0.625565	361.204	5.4788
0.634371	361.495	3.6613				0.770757	361.495	5.0207				0.709642	361.495	3.8307				0.519633	361.495	7.948				0.632758	361.495	11.769				0.626069	361.495	5.5155
0.63488	361.785	3.6018				0.771375	361.785	5.1873				0.710211	361.785	3.8736				0.52005	361.785	8.053				0.633265	361.785	11.5124				0.626572	361.785	5.5263
0.63539	362.076	3.6163				0.771996	362.076	5.3111				0.710782	362.076	3.9398				0.520468	362.076	8.113				0.633774	362.076	11.1897				0.627076	362.076	5.458
0.635901	362.367	3.5201				0.772616	362.367	5.317				0.711353	362.367	3.9231				0.520886	362.367	8.232				0.634284	362.367	11.1893				0.62758	362.367	5.5306
0.63641	362.657	3.5015				0.773234	362.657	5.4211				0.711923	362.657	3.904				0.521303	362.657	8.353				0.634791	362.657	11.0468				0.628082	362.657	5.4899
0.636921	362.948	3.5351				0.773855	362.948	5.4948				0.712494	362.948	3.9203				0.521721	362.948	8.417				0.635301	362.948	10.9709				0.628586	362.948	5.5384
0.63743	363.238	3.488				0.774473	363.238	5.6035				0.713063	363.238	3.8936				0.522138	363.238	8.525				0.635808	363.238	11.1363				0.629088	363.238	5.6721
0.63794	363.529	3.4804				0.775094	363.529	6.0076				0.713635	363.529	3.865				0.522557	363.529	8.572				0.636318	363.529	11.1437				0.629592	363.529	5.6499
0.638451	363.82	3.4527				0.775714	363.82	6.2257				0.714206	363.82	3.8303				0.522975	363.82	8.522				0.636827	363.82	11.3081				0.630096	363.82	5.6966
0.63896	364.11	3.4524				0.776332	364.11	6.2668				0.714775	364.11	3.763				0.523392	364.11	8.613				0.637335	364.11	11.2887				0.630598	364.11	5.7107
0.639471	364.401	3.3208				0.776953	364.401	6.2936				0.715346	364.401	3.8152				0.52381	364.401	8.687				0.637844	364.401	11.3118				0.631102	364.401	5.8951
0.639979	364.691	3.3041				0.777571	364.691	6.2664				0.715916	364.691	3.7292				0.524227	364.691	8.637				0.638352	364.691	11.2251				0.631605	364.691	6.131
0.64049	364.982	3.4014				0.778192	364.982	6.1957				0.716487	364.982	3.7306				0.524645	364.982	8.71				0.638861	364.982	11.4256				0.632109	364.982	6.2627
0.640999	365.272	3.35				0.77881	365.272	6.1219				0.717056	365.272	3.7195				0.525062	365.272	8.862				0.639369	365.272	11.5414				0.632611	365.272	6.4675
0.64151	365.563	3.4118				0.77943	365.563	6.143				0.717627	365.563	3.7707				0.52548	365.563	8.768				0.639878	365.563	11.5832				0.633115	365.563	6.6088
0.64202	365.854	3.4956				0.780051	365.854	5.9866				0.718199	365.854	3.7466				0.525899	365.854	8.587				0.640387	365.854	11.5406				0.633619	365.854	6.8218
0.642529	366.144	3.4602				0.780669	366.144	5.9602				0.718768	366.144	3.6834				0.526315	366.144	8.537				0.640895	366.144	11.7555				0.634121	366.144	6.8287
0.64304	366.435	3.507				0.78129	366.435	6.0223				0.719339	366.435	3.7718				0.526734	366.435	8.462				0.641404	366.435	12.2174				0.634625	366.435	7.0061
0.643549	366.725	3.5989				0.781908	366.725	5.9519				0.719909	366.725	3.7276				0.527151	366.725	8.383				0.641912	366.725	12.1278				0.635127	366.725	7.1294
0.644059	367.016	3.6402				0.782528	367.016	5.9957				0.72048	367.016	3.7166				0.527569	367.016	8.305				0.642421	367.016	12.3664				0.635631	367.016	7.1007
0.64457	367.307	3.7126				0.783149	367.307	5.884				0.721051	367.307	3.7644				0.527987	367.307	8.27				0.642931	367.307	12.4591				0.636135	367.307	7.2319
0.645079	367.597	3.7866				0.783767	367.597	5.8274				0.72162	367.597	3.8433				0.528404	367.597	8.332				0.643438	367.597	12.5402				0.636637	367.597	7.3604
0.64559	367.888	3.8394				0.784388	367.888	5.6596				0.722192	367.888	3.8109				0.528822	367.888	8.362				0.643948	367.888	12.7465				0.637141	367.888	7.4734
0.646099	368.178	3.7424				0.785006	368.178	5.4282				0.722761	368.178	3.7625				0.529239	368.178	8.307				0.644455	368.178	12.7827				0.637644	368.178	7.5753
0.646609	368.469	3.7471				0.785626	368.469	5.1605				0.723332	368.469	3.7544				0.529658	368.469	8.237				0.644965	368.469	12.8828				0.638148	368.469	7.6452
0.64712	368.76	3.7602				0.786247	368.76	4.9273				0.723903	368.76	3.7754				0.530076	368.76	8.133				0.645474	368.76	12.79				0.638652	368.76	7.8084
0.647629	369.05	3.7096				0.786865	369.05	4.7976				0.724473	369.05	3.7367				0.530493	369.05	8.17				0.645982	369.05	12.9445				0.639154	369.05	8.1034
0.64814	369.341	3.776				0.787486	369.341	4.6279				0.725044	369.341	3.7534				0.530911	369.341	8.347				0.646491	369.341	12.8962				0.639658	369.341	8.3127
0.648648	369.631	3.8172				0.788104	369.631	4.4588				0.725613	369.631	3.7253				0.531328	369.631	8.358				0.646999	369.631	13.0596				0.64016	369.631	8.6682
0.649159	369.922	3.7342				0.788724	369.922	4.282				0.726184	369.922	3.7578				0.531746	369.922	8.398				0.647508	369.922	13.0281				0.640664	369.922	8.8328
0.64967	370.213	3.7557				0.789345	370.213	4.1194				0.726756	370.213	3.754				0.532164	370.213	8.628				0.648017	370.213	12.9574				0.641168	370.213	8.7931
0.650179	370.503	3.7869				0.789963	370.503	4.0587				0.727325	370.503	3.7094				0.532581	370.503	8.758				0.648525	370.503	12.9104				0.64167	370.503	8.4294
0.650689	370.794	3.8811				0.790584	370.794	4.041				0.727896	370.794	3.7048				0.533	370.794	8.842				0.649034	370.794	13.0455				0.642174	370.794	7.9853
0.651198	371.084	3.9574				0.791202	371.084	4.0355				0.728466	371.084	3.6774				0.533417	371.084	8.833				0.649542	371.084	13.0065				0.642677	371.084	7.7334
0.651709	371.375	4.0009				0.791822	371.375	4.0039				0.729037	371.375	3.7752				0.533835	371.375	8.862				0.650051	371.375	13.1343				0.643181	371.375	7.253
0.652218	371.665	4.0105				0.792441	371.665	3.8996				0.729606	371.665	3.797				0.534252	371.665	9.042				0.650559	371.665	13.0414				0.643683	371.665	7.0708
0.652728	371.956	3.9631				0.793061	371.956	3.9367				0.730177	371.956	3.8023				0.53467	371.956	9.003				0.651068	371.956	12.9058				0.644187	371.956	6.7353
0.653239	372.247	4.1035				0.793682	372.247	4.015				0.730749	372.247	3.7667				0.535088	372.247	8.955				0.651578	372.247	12.8898				0.644691	372.247	6.6375
0.653748	372.537	4.1412				0.7943	372.537	4.0255				0.731318	372.537	3.681				0.535505	372.537	8.962				0.652085	372.537	12.8613				0.645193	372.537	6.5324
0.654259	372.828	4.2824				0.79492	372.828	3.9723				0.731889	372.828	3.6994				0.535923	372.828	8.975				0.652595	372.828	12.7784				0.645697	372.828	6.559
0.654768	373.118	4.3813				0.795539	373.118	3.9777				0.732458	373.118	3.7079				0.53634	373.118	9.017				0.653102	373.118	12.804				0.646199	373.118	6.4341
0.655278	373.409	4.4438				0.796159	373.409	3.9999				0.73303	373.409	3.6076				0.536759	373.409	8.972				0.653612	373.409	12.7554				0.646703	373.409	6.4557
0.655789	373.7	4.4902				0.79678	373.7	4.0521				0.733601	373.7	3.603				0.537177	373.7	8.885				0.654121	373.7	12.6087				0.647207	373.7	6.3753
0.656298	373.99	4.5215				0.797398	373.99	4.1185				0.73417	373.99	3.599				0.537594	373.99	8.767				0.654629	373.99	12.7794				0.647709	373.99	6.2094
0.656808	374.281	4.5289				0.798018	374.281	4.1502				0.734742	374.281	3.6222				0.538012	374.281	8.647				0.655138	374.281	12.9928				0.648213	374.281	6.1528
0.657317	374.571	4.5504				0.798637	374.571	4.1729				0.735311	374.571	3.6351				0.538429	374.571	8.628				0.655646	374.571	12.9818				0.648716	374.571	5.9328
0.657828	374.862	4.6898				0.799257	374.862	4.1532				0.735882	374.862	3.6142				0.538847	374.862	8.605				0.656155	374.862	13.3691				0.64922	374.862	5.8958
0.658339	375.153	4.9628				0.799878	375.153	4.2368				0.736453	375.153	3.547				0.539266	375.153	8.65				0.656664	375.153	13.3913				0.649724	375.153	5.7915
0.658848	375.443	5.062				0.800496	375.443	4.1797				0.737023	375.443	3.5516				0.539682	375.443	8.743				0.657172	375.443	13.4078				0.650226	375.443	5.6221
0.659358	375.734	5.3209				0.801116	375.734	4.2476				0.737594	375.734	3.5607				0.540101	375.734	8.783				0.657681	375.734	13.3658				0.65073	375.734	5.4956
0.659867	376.024	5.4747				0.801735	376.024	4.3028				0.738163	376.024	3.5619				0.540518	376.024	8.842				0.658189	376.024	13.5315				0.651232	376.024	5.495
0.660378	376.315	5.4807				0.802355	376.315	4.3462				0.738734	376.315	3.5585				0.540936	376.315	8.882				0.658698	376.315	13.5867				0.651736	376.315	5.587
0.660887	376.605	5.6671				0.802973	376.605	4.3125				0.739304	376.605	3.5712				0.541353	376.605	8.862				0.659206	376.605	13.3298				0.652238	376.605	5.6723
0.661397	376.896	5.639				0.803594	376.896	4.3				0.739875	376.896	3.6174				0.541771	376.896	8.728				0.659715	376.896	13.1468				0.652742	376.896	5.6973
0.661908	377.187	5.7813				0.804214	377.187	4.2355				0.740446	377.187	3.6539				0.542189	377.187	8.683				0.660225	377.187	13.1426				0.653246	377.187	5.696
0.662417	377.477	5.8932				0.804833	377.477	4.2361				0.741015	377.477	3.6307				0.542606	377.477	8.783				0.660732	377.477	13.2184				0.653749	377.477	5.8179
0.662928	377.768	6.0233				0.805453	377.768	4.34				0.741587	377.768	3.6645				0.543024	377.768	8.753				0.661242	377.768	13.1547				0.654252	377.768	5.9315
0.663437	378.058	6.2579				0.806071	378.058	4.3319				0.742156	378.058	3.7089				0.543441	378.058	8.645				0.661749	378.058	13.0522				0.654755	378.058	6.0147
0.663947	378.349	6.1963				0.806692	378.349	4.3479				0.742727	378.349	3.8806				0.54386	378.349	8.663				0.662259	378.349	12.9985				0.655259	378.349	6.0774
0.664458	378.64	6.5243				0.807312	378.64	4.3691				0.743299	378.64	3.9489				0.544278	378.64	8.675				0.662768	378.64	13.1174				0.655763	378.64	6.1799
0.664967	378.93	6.5923				0.807931	378.93	4.4164				0.743868	378.93	3.9863				0.544695	378.93	8.672				0.663276	378.93	12.983				0.656265	378.93	6.1252
0.665477	379.221	6.6064				0.808551	379.221	4.4689				0.744439	379.221	4.0266				0.545113	379.221	8.778				0.663785	379.221	12.9323				0.656769	379.221	6.1493
0.665986	379.511	6.7514				0.809169	379.511	4.5279				0.745008	379.511	4.0965				0.54553	379.511	8.825				0.664293	379.511	13.0407				0.657271	379.511	6.2083
0.666497	379.802	6.6589				0.80979	379.802	4.6844				0.74558	379.802	4.1981				0.545948	379.802	8.742				0.664802	379.802	13.1958				0.657775	379.802	5.9852
0.667008	380.093	6.6701				0.81041	380.093	4.6555				0.746151	380.093	4.2219				0.546367	380.093	8.798				0.665311	380.093	13.4241				0.658279	380.093	5.9366
0.667517	380.383	6.5315				0.811029	380.383	4.7267				0.74672	380.383	4.2208				0.546783	380.383	8.735				0.665819	380.383	13.6266				0.658781	380.383	6.1289
0.668027	380.674	6.609				0.811649	380.674	4.6508				0.747291	380.674	4.1492				0.547202	380.674	8.58				0.666328	380.674	13.8329				0.659285	380.674	5.9996
0.668536	380.964	6.5334				0.812267	380.964	4.7513				0.747861	380.964	4.0639				0.547619	380.964	8.547				0.666836	380.964	14.1307				0.659788	380.964	6.077
0.669047	381.255	6.5826				0.812888	381.255	4.8934				0.748432	381.255	4.0087				0.548037	381.255	8.447				0.667345	381.255	14.2022				0.660292	381.255	6.0225
0.669557	381.546	6.6356				0.813508	381.546	4.9679				0.749003	381.546	4.0775				0.548455	381.546	8.313				0.667855	381.546	14.3576				0.660796	381.546	6.0906
0.670066	381.836	6.8025				0.814127	381.836	4.9879				0.749573	381.836	4.0203				0.548872	381.836	8.162				0.668362	381.836	14.5583				0.661298	381.836	6.2621
0.670577	382.127	6.8565				0.814747	382.127	4.998				0.750144	382.127	3.9843				0.54929	382.127	8.133				0.668872	382.127	14.4617				0.661802	382.127	6.3933
0.671086	382.417	6.9567				0.815365	382.417	5.2684				0.750713	382.417	4.0107				0.549707	382.417	8.167				0.669379	382.417	14.2265				0.662304	382.417	6.6837
0.671597	382.708	7.0725				0.815986	382.708	5.257				0.751284	382.708	3.9492				0.550125	382.708	8.213				0.669889	382.708	14.3175				0.662808	382.708	6.7978
0.672107	382.999	7.1192				0.816606	382.999	5.2725				0.751856	382.999	3.9702				0.550544	382.999	8.327				0.670398	382.999	14.3505				0.663312	382.999	6.981
0.672616	383.289	7.1032				0.817225	383.289	5.2635				0.752425	383.289	4.1043				0.550961	383.289	8.298				0.670906	383.289	14.3447				0.663814	383.289	7.1641
0.673127	383.58	7.0898				0.817845	383.58	5.2618				0.752996	383.58	4.0768				0.551379	383.58	8.235				0.671415	383.58	14.3126				0.664318	383.58	7.5219
0.673636	383.87	7.1751				0.818463	383.87	5.1926				0.753565	383.87	4.0292				0.551796	383.87	8.345				0.671923	383.87	14.319				0.66482	383.87	7.6783
0.674146	384.161	7.1264				0.819084	384.161	5.2078				0.754137	384.161	4.0514				0.552214	384.161	8.453				0.672432	384.161	14.1498				0.665324	384.161	7.6363
0.674655	384.451	7.0054				0.819702	384.451	5.2079				0.754706	384.451	4.0606				0.552631	384.451	8.417				0.672939	384.451	14.2346				0.665827	384.451	7.3246
0.675166	384.742	6.9001				0.820323	384.742	5.1415				0.755277	384.742	4.0655				0.553049	384.742	8.387				0.673449	384.742	14.2727				0.666331	384.742	7.4702
0.675677	385.033	6.7446				0.820943	385.033	5.147				0.755848	385.033	4.0261				0.553468	385.033	8.367				0.673958	385.033	14.1714				0.666835	385.033	7.3644
0.676186	385.323	6.7515				0.821561	385.323	5.1975				0.756418	385.323	4.0921				0.553884	385.323	8.302				0.674466	385.323	14.2901				0.667337	385.323	7.3941
0.676696	385.614	6.8003				0.822182	385.614	5.2167				0.756989	385.614	4.205				0.554303	385.614	8.363				0.674975	385.614	14.2247				0.667841	385.614	7.131
0.677205	385.904	6.6835				0.8228	385.904	5.3403				0.757558	385.904	4.2006				0.55472	385.904	8.365				0.675483	385.904	14.3653				0.668343	385.904	7.1469
0.677716	386.195	6.6127				0.823421	386.195	5.5138				0.75813	386.195	4.2891				0.555138	386.195	8.238				0.675992	386.195	14.4353				0.668847	386.195	7.118
0.678226	386.486	6.7033				0.824041	386.486	5.529				0.758701	386.486	4.396				0.555556	386.486	8.22				0.676502	386.486	14.5465				0.669351	386.486	6.876
0.678735	386.776	6.5916				0.824659	386.776	5.6663				0.75927	386.776	4.4576				0.555973	386.776	8.193				0.677009	386.776	14.7294				0.669853	386.776	6.565
0.679246	387.067	6.6345				0.82528	387.067	5.7417				0.759841	387.067	4.5086				0.556391	387.067	8.242				0.677519	387.067	14.606				0.670357	387.067	6.4322
0.679755	387.357	6.6839				0.825898	387.357	5.8002				0.760411	387.357	4.5262				0.556808	387.357	8.285				0.678026	387.357	14.4203				0.67086	387.357	6.2276
0.680266	387.648	6.6008				0.826519	387.648	5.7905				0.760982	387.648	4.5399				0.557227	387.648	8.125				0.678535	387.648	14.1318				0.671364	387.648	6.1089
0.680776	387.939	6.5129				0.827139	387.939	5.8034				0.761553	387.939	4.5996				0.557645	387.939	7.943				0.679045	387.939	13.9429				0.671868	387.939	6.1585
0.681285	388.229	6.4543				0.827757	388.229	5.8347				0.762122	388.229	4.5612				0.558062	388.229	7.873				0.679552	388.229	13.7508				0.67237	388.229	5.9867
0.681796	388.52	6.3635				0.828378	388.52	5.8305				0.762694	388.52	4.601				0.55848	388.52	7.813				0.680062	388.52	13.4186				0.672874	388.52	5.8669
0.682305	388.81	6.2501				0.828996	388.81	5.6812				0.763263	388.81	4.6218				0.558897	388.81	7.795				0.680569	388.81	13.1738				0.673376	388.81	5.7327
0.682815	389.101	6.1429				0.829617	389.101	5.6727				0.763834	389.101	4.6382				0.559315	389.101	7.74				0.681079	389.101	12.6904				0.67388	389.101	5.734
0.683326	389.392	5.9673				0.830237	389.392	5.601				0.764406	389.392	4.6597				0.559733	389.392	7.697				0.681588	389.392	12.5936				0.674384	389.392	5.6864
0.683835	389.682	6.0248				0.830855	389.682	5.6029				0.764975	389.682	4.6402				0.56015	389.682	7.768				0.682096	389.682	12.2435				0.674886	389.682	5.5222
0.684346	389.973	5.7739				0.831476	389.973	5.5417				0.765546	389.973	4.5701				0.560569	389.973	7.742				0.682605	389.973	12.1109				0.67539	389.973	5.5524
0.684855	390.263	5.5142				0.832094	390.263	5.5696				0.766115	390.263	4.5774				0.560985	390.263	7.697				0.683113	390.263	11.8042				0.675892	390.263	5.4254
0.685365	390.554	5.5657				0.832715	390.554	5.5096				0.766687	390.554	4.5411				0.561404	390.554	7.588				0.683622	390.554	11.6987				0.676396	390.554	5.3113
0.685874	390.844	5.3999				0.833333	390.844	5.4529				0.767256	390.844	4.551				0.561821	390.844	7.455				0.68413	390.844	11.5439				0.676899	390.844	5.3044
0.686385	391.135	5.0001				0.833953	391.135	5.4286				0.767827	391.135	4.5495				0.562239	391.135	7.418				0.684639	391.135	11.2678				0.677403	391.135	5.1938
0.686895	391.426	4.7765				0.834574	391.426	5.4027				0.768398	391.426	4.3801				0.562657	391.426	7.367				0.685148	391.426	11.3183				0.677907	391.426	5.2089
0.687404	391.716	4.7992				0.835192	391.716	5.4271				0.768968	391.716	4.3117				0.563074	391.716	7.3				0.685656	391.716	11.234				0.678409	391.716	5.2368
0.687915	392.007	4.7075				0.835813	392.007	5.4014				0.769539	392.007	4.2948				0.563492	392.007	7.263				0.686165	392.007	11.1119				0.678913	392.007	5.2789
0.688424	392.297	4.6045				0.836431	392.297	5.3981				0.770108	392.297	4.3224				0.563909	392.297	7.222				0.686673	392.297	11.1081				0.679415	392.297	5.3399
0.688935	392.588	4.6204				0.837051	392.588	5.417				0.77068	392.588	4.2314				0.564328	392.588	7.203				0.687182	392.588	11.3425				0.679919	392.588	5.3189
0.689445	392.879	4.5454				0.837672	392.879	5.2804				0.771251	392.879	4.0647				0.564746	392.879	7.322				0.687692	392.879	11.253				0.680423	392.879	5.4767
0.689954	393.169	4.5687				0.83829	393.169	5.2859				0.77182	393.169	4.0936				0.565163	393.169	7.408				0.688199	393.169	11.0882				0.680925	393.169	5.46
0.690465	393.46	4.5446				0.838911	393.46	5.1581				0.772391	393.46	4.1623				0.565581	393.46	7.362				0.688709	393.46	11.222				0.681429	393.46	5.4909
0.690974	393.75	4.4617				0.839529	393.75	5.084				0.772961	393.75	3.9786				0.565998	393.75	7.385				0.689216	393.75	11.3495				0.681932	393.75	5.4968
0.691484	394.041	4.5356				0.840149	394.041	5.0351				0.773532	394.041	3.9234				0.566416	394.041	7.525				0.689726	394.041	11.2555				0.682436	394.041	5.5924
0.691995	394.332	4.6614				0.84077	394.332	5.1057				0.774103	394.332	3.9174				0.566834	394.332	7.52				0.690235	394.332	11.4388				0.68294	394.332	5.7327
0.692504	394.622	4.5951				0.841388	394.622	5.04				0.774672	394.622	3.9411				0.567251	394.622	7.547				0.690743	394.622	11.3565				0.683442	394.622	5.8673
0.693015	394.913	4.6501				0.842009	394.913	5.0646				0.775244	394.913	3.8671				0.56767	394.913	7.618				0.691252	394.913	11.4041				0.683946	394.913	5.9006
0.693524	395.203	4.7814				0.842627	395.203	5.1302				0.775813	395.203	3.8123				0.568086	395.203	7.557				0.69176	395.203	11.1087				0.684448	395.203	5.793
0.694034	395.494	4.8795				0.843247	395.494	5.1385				0.776384	395.494	3.8674				0.568505	395.494	7.463				0.692269	395.494	10.9775				0.684952	395.494	5.8536
0.694543	395.784	4.9068				0.843866	395.784	5.1558				0.776954	395.784	3.9537				0.568922	395.784	7.423				0.692777	395.784	10.8378				0.685454	395.784	6.0482
0.695054	396.075	5.0136				0.844486	396.075	5.076				0.777525	396.075	3.8556				0.56934	396.075	7.417				0.693286	396.075	10.7347				0.685958	396.075	5.9347
0.695564	396.366	5.0788				0.845107	396.366	5.1762				0.778096	396.366	3.8266				0.569758	396.366	7.29				0.693795	396.366	10.6421				0.686462	396.366	5.9558
0.696073	396.656	5.166				0.845725	396.656	5.2936				0.778665	396.656	3.7704				0.570175	396.656	7.272				0.694303	396.656	10.4641				0.686964	396.656	5.9903
0.696584	396.947	5.2255				0.846345	396.947	5.27				0.779237	396.947	3.8239				0.570593	396.947	7.317				0.694812	396.947	10.4982				0.687468	396.947	5.8984
0.697093	397.237	5.2157				0.846964	397.237	5.2151				0.779806	397.237	3.8445				0.57101	397.237	7.285				0.69532	397.237	10.5085				0.687971	397.237	5.9139
0.697604	397.528	5.2583				0.847584	397.528	5.2474				0.780377	397.528	3.7357				0.571429	397.528	7.22				0.695829	397.528	10.5779				0.688475	397.528	5.7356
0.698114	397.819	5.2071				0.848205	397.819	5.2322				0.780948	397.819	3.7107				0.571847	397.819	7.175				0.696339	397.819	10.4653				0.688979	397.819	5.8068
0.698623	398.109	5.2362				0.848823	398.109	5.1557				0.781518	398.109	3.6748				0.572264	398.109	7.198				0.696846	398.109	10.3538				0.689481	398.109	5.7595
0.699134	398.4	5.2194				0.849443	398.4	5.2286				0.782089	398.4	3.5599				0.572682	398.4	7.225				0.697356	398.4	10.3118				0.689985	398.4	5.6261
0.699643	398.69	5.2345				0.850062	398.69	5.2412				0.782658	398.69	3.532				0.573099	398.69	7.172				0.697863	398.69	10.3736				0.690487	398.69	5.5439
0.700153	398.981	5.1087				0.850682	398.981	5.3163				0.783229	398.981	3.571				0.573517	398.981	7.22				0.698373	398.981	10.0998				0.690991	398.981	5.5301
0.700664	399.272	5.2307				0.851303	399.272	5.4153				0.783801	399.272	3.5373				0.573935	399.272	7.3				0.698882	399.272	10.045				0.691495	399.272	5.435
0.701173	399.562	5.2078				0.851921	399.562	5.4266				0.78437	399.562	3.5142				0.574352	399.562	7.228				0.69939	399.562	10.0493				0.691997	399.562	5.2793
0.701684	399.853	5.0957				0.852541	399.853	5.456				0.784941	399.853	3.4985				0.574771	399.853	7.265				0.699899	399.853	9.9398				0.692501	399.853	5.3058
0.702193	400.143	4.9349				0.85316	400.143	5.5607				0.785511	400.143	3.4891				0.575188	400.143	7.347				0.700407	400.143	10.0025				0.693004	400.143	5.296
0.702703	400.434	4.8267				0.85378	400.434	5.5773				0.786082	400.434	3.4588				0.575606	400.434	7.393				0.700916	400.434	9.9726				0.693507	400.434	5.2546
0.703214	400.725	4.835				0.854401	400.725	5.5958				0.786653	400.725	3.5052				0.576024	400.725	7.43				0.701425	400.725	10.0084				0.694011	400.725	5.2904
0.703723	401.015	4.7464				0.855019	401.015	5.5652				0.787222	401.015	3.5521				0.576441	401.015	7.407				0.701933	401.015	9.9254				0.694514	401.015	5.2827
0.704233	401.306	4.7276				0.855639	401.306	5.7092				0.787794	401.306	3.4646				0.576859	401.306	7.495				0.702442	401.306	9.7705				0.695018	401.306	5.2405
0.704742	401.596	4.7663				0.856258	401.596	5.9242				0.788363	401.596	3.5416				0.577276	401.596	7.647				0.70295	401.596	9.7901				0.69552	401.596	5.1734
0.705253	401.887	4.8157				0.856878	401.887	5.7958				0.788934	401.887	3.5261				0.577694	401.887	7.717				0.703459	401.887	9.6556				0.696024	401.887	5.1778
0.705762	402.177	4.6842				0.857496	402.177	5.8832				0.789503	402.177	3.5494				0.578111	402.177	7.655				0.703967	402.177	9.5452				0.696526	402.177	5.0628
0.706273	402.468	4.671				0.858117	402.468	6.052				0.790075	402.468	3.5033				0.57853	402.468	7.627				0.704476	402.468	9.4502				0.69703	402.468	4.9734
0.706783	402.759	4.7078				0.858737	402.759	6.1894				0.790646	402.759	3.548				0.578948	402.759	7.705				0.704986	402.759	9.462				0.697534	402.759	4.9869
0.707292	403.049	4.7692				0.859356	403.049	6.5149				0.791215	403.049	3.5573				0.579365	403.049	7.583				0.705493	403.049	9.4897				0.698036	403.049	4.9404
[truncated: 1,007 more rows]

## Sheet: 3.10.19 V409I
Line width = 300
[truncated: 1,971 more rows]

## Sheet: 3.10.19 WT
Line width = 300
WT 1		0-33				WT 2		0-33				WT 3		0-33
[truncated: 1,502 more rows]

## Sheet: 7.26.19 V409A
Line width = 300
[truncated: 2,031 more rows]

[truncated: 6 more sheets: 7.26.19 V409I, 7.26.19 WT, 7.12.19 V409A, 7.12.19 V409I, 7.12.19 WT, Combo]
