# Supplementary material for: TUBA1A tubulinopathy mutants disrupt neuron morphogenesis and override XMAP215/Stu2 regulation of microtubule dynamics
Source: eLife. 2022 May 5;11:e76189. doi: 10.7554/eLife.76189 (PMC9236607; doi:10.7554/eLife.76189)
Supplement: Figure 2—source data 1. [file elife-76189-fig2-data1.xlsx]

## Sheet: WT DIV1
V409 neuron prep_08.24.2020
* all .nd2 images were converted into an 8-bit grayscale .tiff in order to be analyzed in NeuronJ (imageJ plugin) *
Scale is set at 7.5µm/pixel
Image 1
WT DIV1 neuron #2_all
Electroporation efficency by measuring GFP efficency with "Minimum" ROI (only covering soma)
		Label	Area	Mean	Min	Max	BX	BY	Width	Height	IntDen	RawIntDen
488	1	C1-MAX_WT DIV1 neuron #2_all.nd2:0266-0290	67.556	151.053	101	255	34.533	13.2	8.267	44.533	10204.5	574001
640	2	C2-MAX_WT DIV1 neuron #2_all.nd2:0266-0290	67.556	88.927	19	192	34.533	13.2	8.267	44.533	6007.48	337921
405	3	C3-MAX_WT DIV1 neuron #2_all.nd2:0266-0290	67.556	51.533	2	143	34.533	13.2	8.267	44.533	3481.35	195826
640 Tracings
Image	Tracing	Cluster	Type	Label	Length [micron]	Mean Val [a.u.]	SD Val [a.u.]	Min Val [a.u.]	Max Val [a.u.]
MAX_WT DIV1 neuron #2_640_1x2	N1	Default	Primary	Default	57.436	48.66	33.204	5	102
MAX_WT DIV1 neuron #2_640_1x2	N2	Default	Primary	Default	45.359	59.025	37.235	8	102
MAX_WT DIV1 neuron #2_640_1x2	N3	Default	Secondary	Default	29.352	38.02	18.15	5	90
MAX_WT DIV1 neuron #2_640_1x2	N4	Default	Secondary	Default	21.222	37.244	17.519	6	80
640 Groups
Image	Cluster	Type	Count	Sum Len [micron]	Mean Len [micron]	SD Len [micron]	Min Len [micron]	Max Len [micron]	Mean Val [a.u.]	SD Val [a.u.]	Min Val [a.u.]	Max Val [a.u.]
MAX_WT DIV1 neuron #2_640_1x2	All	All	4	153.368	38.342	16.204	21.222	57.436	48.197	31.625	5	102
Image 2
WT DIV1 neuron #3_all
Electroporation efficency by measuring GFP efficency with "Minimum" ROI (only covering soma)
		Label	Area	Mean	Min	Max	BX	BY	Width	Height	IntDen	RawIntDen
488	1	C1-MAX_WT DIV1 neuron #3_all.nd2:WT DIV1 neuron #3_all_Minimum	55.022	163.351	97	255	27.867	35.733	12.267	8	8987.91	505570
640	2	C2-MAX_WT DIV1 neuron #3_all.nd2:WT DIV1 neuron #3_all_Minimum	55.022	170.453	41	255	27.867	35.733	12.267	8	9378.7	527552
405	3	C3-MAX_WT DIV1 neuron #3_all.nd2:WT DIV1 neuron #3_all_Minimum	55.022	34.816	4	117	27.867	35.733	12.267	8	1915.64	107755
640 Tracings
Image	Tracing	Cluster	Type	Label	Length [micron]	Mean Val [a.u.]	SD Val [a.u.]	Min Val [a.u.]	Max Val [a.u.]
MAX_WT DIV1 neuron #3_640_1x1	N1	Default	Primary	Default	10.52	24.31	15.501	0	57
MAX_WT DIV1 neuron #3_640_1x1	N2	Default	Primary	Default	12.144	61.681	36.535	0	102
MAX_WT DIV1 neuron #3_640_1x1	N3	Default	Primary	Default	5.209	72.722	20.411	41	100
640 Groups
Image	Cluster	Type	Count	Sum Len [micron]	Mean Len [micron]	SD Len [micron]	Min Len [micron]	Max Len [micron]	Mean Val [a.u.]	SD Val [a.u.]	Min Val [a.u.]	Max Val [a.u.]
MAX_WT DIV1 neuron #3_640_1x1	All	All	3	27.872	9.291	3.627	5.209	12.144	50.288	34.123	0	102
Image 3
WT DIV1 neuron #7_all
Electroporation efficency by measuring GFP efficency with "Minimum" ROI (only covering soma)
		Label	Area	Mean	Min	Max	BX	BY	Width	Height	IntDen	RawIntDen
488	1	C1-MAX_WT DIV1 neuron #7_all.nd2:WT DIV1 neuron #7_all_Minimum	56.676	126.301	73	255	0	32.4	41.867	17.733	7158.17	402647
640	2	C2-MAX_WT DIV1 neuron #7_all.nd2:WT DIV1 neuron #7_all_Minimum	56.676	93.764	8	255	0	32.4	41.867	17.733	5314.12	298919
405	3	C3-MAX_WT DIV1 neuron #7_all.nd2:WT DIV1 neuron #7_all_Minimum	56.676	47.604	3	126	0	32.4	41.867	17.733	2697.97	151761
640 Tracings
Image	Tracing	Cluster	Type	Label	Length [micron]	Mean Val [a.u.]	SD Val [a.u.]	Min Val [a.u.]	Max Val [a.u.]
MAX_WT DIV1 neuron #7_640_1x1	N1	Default	Primary	Default	11.382	68.047	38.102	1	102
MAX_WT DIV1 neuron #7_640_1x1	N2	Default	Primary	Default	7.14	56.049	26.13	15	101
MAX_WT DIV1 neuron #7_640_1x1	N3	Default	Primary	Default	6.318	49.804	28.65	7	102
MAX_WT DIV1 neuron #7_640_1x1	N4	Default	Primary	Default	7.555	65.857	23.588	23	102
640 Groups
Image	Cluster	Type	Count	Sum Len [micron]	Mean Len [micron]	SD Len [micron]	Min Len [micron]	Max Len [micron]	Mean Val [a.u.]	SD Val [a.u.]	Min Val [a.u.]	Max Val [a.u.]
MAX_WT DIV1 neuron #7_640_1x1	All	All	4	32.395	8.099	2.248	6.318	11.382	61.444	31.778	1	102
Image 4
WT DIV1 neuron #8_all
Electroporation efficency by measuring GFP efficency with "Minimum" ROI (only covering soma)
		Label	Area	Mean	Min	Max	BX	BY	Width	Height	IntDen	RawIntDen
488	1	C1-MAX_WT DIV1 neuron #8_all.nd2:WT DIV1 neuron #8_all_Minimum	50.329	116.456	74	255	21.733	22.533	13.867	23.6	5861.12	329688
640	2	C2-MAX_WT DIV1 neuron #8_all.nd2:WT DIV1 neuron #8_all_Minimum	50.329	84.025	15	255	21.733	22.533	13.867	23.6	4228.87	237874
405	3	C3-MAX_WT DIV1 neuron #8_all.nd2:WT DIV1 neuron #8_all_Minimum	50.329	93.358	2	203	21.733	22.533	13.867	23.6	4698.6	264296
640 Tracings
Image	Tracing	Cluster	Type	Label	Length [micron]	Mean Val [a.u.]	SD Val [a.u.]	Min Val [a.u.]	Max Val [a.u.]
MAX_WT DIV1 neuron #8_640_1x1	N1	Default	Primary	Default	23.838	85.205	23.888	21	102
MAX_WT DIV1 neuron #8_640_1x1	N2	Default	Primary	Default	8.795	68.902	24.651	21	102
MAX_WT DIV1 neuron #8_640_1x1	N3	Default	Primary	Default	4.306	89.667	18.513	30	102
640 Groups
Image	Cluster	Type	Count	Sum Len [micron]	Mean Len [micron]	SD Len [micron]	Min Len [micron]	Max Len [micron]	Mean Val [a.u.]	SD Val [a.u.]	Min Val [a.u.]	Max Val [a.u.]
MAX_WT DIV1 neuron #8_640_1x1	All	All	3	36.94	12.313	10.23	4.306	23.838	81.973	24.478	21	102
Image 5
WT DIV1 neuron #10_all
Electroporation efficency by measuring GFP efficency with "Minimum" ROI (only covering soma)
		Label	Area	Mean	Min	Max	BX	BY	Width	Height	IntDen	RawIntDen
488	1	C1-MAX_WT DIV1 neuron #10_all.nd2:WT DIV1 neuron #10_all_Minimum	78.027	109.968	78	255	11.333	0.533	52.133	60.667	8580.41	482648
640	2	C2-MAX_WT DIV1 neuron #10_all.nd2:WT DIV1 neuron #10_all_Minimum	78.027	27.741	1	62	11.333	0.533	52.133	60.667	2164.57	121757
405	3	C3-MAX_WT DIV1 neuron #10_all.nd2:WT DIV1 neuron #10_all_Minimum	78.027	65.271	3	161	11.333	0.533	52.133	60.667	5092.87	286474
640 Tracings
Image	Tracing	Cluster	Type	Label	Length [micron]	Mean Val [a.u.]	SD Val [a.u.]	Min Val [a.u.]	Max Val [a.u.]
MAX_WT DIV1 neuron #10_640_1x2	N1	Default	Primary	Default	61.128	76.025	17.834	5	102
MAX_WT DIV1 neuron #10_640_1x2	N2	Default	Primary	Default	10.866	27.053	7.64	9	43
MAX_WT DIV1 neuron #10_640_1x2	N3	Default	Primary	Default	35.707	51.073	22.967	12	102
MAX_WT DIV1 neuron #10_640_1x2	N4	Default	Secondary	Default	10.683	34.487	14.018	12	76
640 Groups
Image	Cluster	Type	Count	Sum Len [micron]	Mean Len [micron]	SD Len [micron]	Min Len [micron]	Max Len [micron]	Mean Val [a.u.]	SD Val [a.u.]	Min Val [a.u.]	Max Val [a.u.]
MAX_WT DIV1 neuron #10_640_1x2	All	All	4	118.384	29.596	24.084	10.683	61.128	60.602	25.674	5	102
Image 6
WT DIV1 neuron #13_all
Electroporation efficency by measuring GFP efficency with "Minimum" ROI (only covering soma)
		Label	Area	Mean	Min	Max	BX	BY	Width	Height	IntDen	RawIntDen
488	1	C1-MAX_WT DIV1 neuron #13_all.nd2:WT DIV1 neuron #13_all_Minimum	80.018	139.056	90	255	21.733	26.4	18.4	13.2	11126.9	625890
640	2	C2-MAX_WT DIV1 neuron #13_all.nd2:WT DIV1 neuron #13_all_Minimum	80.018	90.771	14	255	21.733	26.4	18.4	13.2	7263.32	408562
405	3	C3-MAX_WT DIV1 neuron #13_all.nd2:WT DIV1 neuron #13_all_Minimum	80.018	67.1	4	152	21.733	26.4	18.4	13.2	5369.16	302015
640 Tracings
Image	Tracing	Cluster	Type	Label	Length [micron]	Mean Val [a.u.]	SD Val [a.u.]	Min Val [a.u.]	Max Val [a.u.]
MAX_WT DIV1 neuron #13_640_1x1	N1	Default	Primary	Default	2.804	45.952	13.873	28	81
MAX_WT DIV1 neuron #13_640_1x1	N2	Default	Primary	Default	4.48	46	27.612	3	82
MAX_WT DIV1 neuron #13_640_1x1	N3	Default	Primary	Default	7.135	47.353	21.717	14	102
MAX_WT DIV1 neuron #13_640_1x1	N4	Default	Primary	Default	15.775	84.64	24.804	10	102
640 Groups
Image	Cluster	Type	Count	Sum Len [micron]	Mean Len [micron]	SD Len [micron]	Min Len [micron]	Max Len [micron]	Mean Val [a.u.]	SD Val [a.u.]	Min Val [a.u.]	Max Val [a.u.]
MAX_WT DIV1 neuron #13_640_1x1	All	All	4	30.194	7.548	5.767	2.804	15.775	66.36	30.264	3	102
Image 7
WT DIV1 neuron #15_all
Electroporation efficency by measuring GFP efficency with "Minimum" ROI (only covering soma)
		Label	Area	Mean	Min	Max	BX	BY	Width	Height	IntDen	RawIntDen
488	1	C1-MAX_WT DIV1 neuron #15_all.nd2:WT DIV1 neuron #15_all_Minimum	73.742	149.21	100	255	30.533	26.4	10.4	11.467	11003.1	618922
640	2	C2-MAX_WT DIV1 neuron #15_all.nd2:WT DIV1 neuron #15_all_Minimum	73.742	114.882	21	255	30.533	26.4	10.4	11.467	8471.68	476532
405	3	C3-MAX_WT DIV1 neuron #15_all.nd2:WT DIV1 neuron #15_all_Minimum	73.742	51.624	3	125	30.533	26.4	10.4	11.467	3806.88	214137
640 Tracings
Image	Tracing	Cluster	Type	Label	Length [micron]	Mean Val [a.u.]	SD Val [a.u.]	Min Val [a.u.]	Max Val [a.u.]
MAX_WT DIV1 neuron #15_640_1x1	N2	Default	Primary	Default	14.895	57.342	18.777	18	102
MAX_WT DIV1 neuron #15_640_1x1	N3	Default	Primary	Default	6.518	72.478	20.511	16	102
MAX_WT DIV1 neuron #15_640_1x1	N4	Default	Primary	Default	4.684	55.611	24.825	14	101
MAX_WT DIV1 neuron #15_640_1x1	N5	Default	Primary	Default	5.909	61.37	30.568	24	102
MAX_WT DIV1 neuron #15_640_1x1	N6	Default	Primary	Default	5.089	20.951	14.36	5	48
MAX_WT DIV1 neuron #15_640_1x1	N7	Default	Primary	Default	3.303	45.615	23.604	8	75
MAX_WT DIV1 neuron #15_640_1x1	N8	Default	Primary	Default	8.838	29.03	14.013	4	57
MAX_WT DIV1 neuron #15_640_1x1	N9	Default	Primary	Default	7.746	36.686	15.958	11	88
640 Groups
Image	Cluster	Type	Count	Sum Len [micron]	Mean Len [micron]	SD Len [micron]	Min Len [micron]	Max Len [micron]	Mean Val [a.u.]	SD Val [a.u.]	Min Val [a.u.]	Max Val [a.u.]
MAX_WT DIV1 neuron #15_640_1x1	All	All	8	56.982	7.123	3.591	3.303	14.895	48.123	25.62	4	102
Image 8
WT DIV1 neuron #16_all
Electroporation efficency by measuring GFP efficency with "Minimum" ROI (only covering soma)
		Label	Area	Mean	Min	Max	BX	BY	Width	Height	IntDen	RawIntDen
488	1	C1-MAX_WT DIV1 neuron #16_all.nd2:WT DIV1 neuron #16_all_Minimum	91.04	134.271	94	255	21.067	7.067	15.467	44.933	12224	687600
640	2	C2-MAX_WT DIV1 neuron #16_all.nd2:WT DIV1 neuron #16_all_Minimum	91.04	88.21	12	255	21.067	7.067	15.467	44.933	8030.67	451725
405	3	C3-MAX_WT DIV1 neuron #16_all.nd2:WT DIV1 neuron #16_all_Minimum	91.04	40.4	2	137	21.067	7.067	15.467	44.933	3678.03	206889
640 Tracings (Top Neuron)
Image	Tracing	Cluster	Type	Label	Length [micron]	Mean Val [a.u.]	SD Val [a.u.]	Min Val [a.u.]	Max Val [a.u.]
MAX_WT DIV1 neuron #16_640_1x1	N1	Default	Primary	Default	14.426	89.557	25.672	7	102
MAX_WT DIV1 neuron #16_640_1x1	N2	Default	Primary	Default	20.987	89.931	18.22	37	102
640 Groups (Top Neuron)
Image	Cluster	Type	Count	Sum Len [micron]	Mean Len [micron]	SD Len [micron]	Min Len [micron]	Max Len [micron]	Mean Val [a.u.]	SD Val [a.u.]	Min Val [a.u.]	Max Val [a.u.]
MAX_WT DIV1 neuron #16_640_1x1	All	All	2	35.413	17.707	4.639	14.426	20.987	89.764	21.82	7	102
640 Tracings (Bottom Neuron)
Image	Tracing	Cluster	Type	Label	Length [micron]	Mean Val [a.u.]	SD Val [a.u.]	Min Val [a.u.]	Max Val [a.u.]
MAX_WT DIV1 neuron #16_640_1x1	N3	Default	Primary	Default	10.585	48.563	23.729	15	102
MAX_WT DIV1 neuron #16_640_1x1	N4	Default	Primary	Default	8.382	26.934	13.032	5	70
640 Groups (Bottom Neuron)
Image	Cluster	Type	Count	Sum Len [micron]	Mean Len [micron]	SD Len [micron]	Min Len [micron]	Max Len [micron]	Mean Val [a.u.]	SD Val [a.u.]	Min Val [a.u.]	Max Val [a.u.]
MAX_WT DIV1 neuron #16_640_1x1	All	All	2	18.967	9.484	1.558	8.382	10.585	38.568	22.267	5	102
Image 9
WT DIV1 neuron #17_all
Electroporation efficency by measuring GFP efficency with "Minimum" ROI (only covering soma)
		Label	Area	Mean	Min	Max	BX	BY	Width	Height	IntDen	RawIntDen
488	1	C1-MAX_WT DIV1 neuron #17_all.nd2:WT DIV1 neuron #17_all_Minimum	42.204	160.134	98	255	36.8	21.867	7.067	12	6758.36	380158
640	2	C2-MAX_WT DIV1 neuron #17_all.nd2:WT DIV1 neuron #17_all_Minimum	42.204	185.18	62	255	36.8	21.867	7.067	12	7815.41	439617
405	3	C3-MAX_WT DIV1 neuron #17_all.nd2:WT DIV1 neuron #17_all_Minimum	42.204	77.202	4	164	36.8	21.867	7.067	12	3258.26	183277
640 Tracings
Image	Tracing	Cluster	Type	Label	Length [micron]	Mean Val [a.u.]	SD Val [a.u.]	Min Val [a.u.]	Max Val [a.u.]
MAX_WT DIV1 neuron #17_640_1x1	N1	Default	Primary	Default	0.68	87.667	16.836	60	102
MAX_WT DIV1 neuron #17_640_1x1	N2	Default	Primary	Default	3.826	71.71	27.444	25	102
MAX_WT DIV1 neuron #17_640_1x1	N3	Default	Primary	Default	2.576	100.048	6.168	81	102
MAX_WT DIV1 neuron #17_640_1x1	N4	Default	Primary	Default	1.36	102	0	102	102
MAX_WT DIV1 neuron #17_640_1x1	N5	Default	Primary	Default	19.09	98.366	12.074	32	102
MAX_WT DIV1 neuron #17_640_1x1	N6	Default	Primary	Default	24.482	94.289	16.87	28	102
MAX_WT DIV1 neuron #17_640_1x1	N7	Default	Primary	Default	2.012	95.75	8.347	85	102
MAX_WT DIV1 neuron #17_640_1x1	N8	Default	Secondary	Default	2.409	73.188	25.451	21	102
MAX_WT DIV1 neuron #17_640_1x1	N9	Default	Secondary	Default	2.65	80.875	25.287	28	102
640 Groups
Image	Cluster	Type	Count	Sum Len [micron]	Mean Len [micron]	SD Len [micron]	Min Len [micron]	Max Len [micron]	Mean Val [a.u.]	SD Val [a.u.]	Min Val [a.u.]	Max Val [a.u.]
MAX_WT DIV1 neuron #17_640_1x1	All	All	9	59.085	6.565	8.778	0.68	24.482	93.012	18.411	21	102
Image 10
WT DIV1 neuron #18_all
Electroporation efficency by measuring GFP efficency with "Minimum" ROI (only covering soma)
		Label	Area	Mean	Min	Max	BX	BY	Width	Height	IntDen	RawIntDen
488	1	C1-MAX_WT DIV1 neuron #18_all.nd2:WT DIV1 neuron #18_all_Minimum	222.222	114.235	60	255	7.333	13.6	52.933	31.333	25385.5	1427932
640	2	C2-MAX_WT DIV1 neuron #18_all.nd2:WT DIV1 neuron #18_all_Minimum	222.222	56.153	2	255	7.333	13.6	52.933	31.333	12478.4	701909
405	3	C3-MAX_WT DIV1 neuron #18_all.nd2:WT DIV1 neuron #18_all_Minimum	222.222	29.297	2	155	7.333	13.6	52.933	31.333	6510.35	366207
640 Tracings
Image	Tracing	Cluster	Type	Label	Length [micron]	Mean Val [a.u.]	SD Val [a.u.]	Min Val [a.u.]	Max Val [a.u.]
MAX_WT DIV1 neuron #18_640_1x1	N1	Default	Primary	Default	5.858	11.512	4.718	6	24
MAX_WT DIV1 neuron #18_640_1x1	N2	Default	Primary	Default	6.243	18.639	8.107	3	34
MAX_WT DIV1 neuron #18_640_1x1	N3	Default	Primary	Default	10.753	34.053	11.756	14	61
MAX_WT DIV1 neuron #18_640_1x1	N4	Default	Primary	Default	4.802	42.389	9.822	23	59
MAX_WT DIV1 neuron #18_640_1x1	N5	Default	Primary	Default	24.366	73.783	33.816	10	102
MAX_WT DIV1 neuron #18_640_1x1	N6	Default	Primary	Default	12.929	61.479	15.713	27	95
MAX_WT DIV1 neuron #18_640_1x1	N8	Default	Primary	Default	17.863	67.236	34.393	7	102
MAX_WT DIV1 neuron #18_640_1x1	N7	Default	Secondary	Default	14.493	30.66	12.959	7	57
640 Groups
Image	Cluster	Type	Count	Sum Len [micron]	Mean Len [micron]	SD Len [micron]	Min Len [micron]	Max Len [micron]	Mean Val [a.u.]	SD Val [a.u.]	Min Val [a.u.]	Max Val [a.u.]
MAX_WT DIV1 neuron #18_640_1x1	All	All	8	97.308	12.163	6.744	4.802	24.366	50.956	31.707	3	102
Image 11
WT DIV1 neuron #21_all
Electroporation efficency by measuring GFP efficency with "Minimum" ROI (only covering soma)
		Label	Area	Mean	Min	Max	BX	BY	Width	Height	IntDen	RawIntDen
488	1	C1-MAX_WT DIV1 neuron #21_all.nd2:WT DIV1 neuron #21_all_Minimum	59.769	135.51	92	255	30.267	17.067	28.267	30.133	8099.31	455586
640	2	C2-MAX_WT DIV1 neuron #21_all.nd2:WT DIV1 neuron #21_all_Minimum	59.769	78.974	7	255	30.267	17.067	28.267	30.133	4720.2	265511
405	3	C3-MAX_WT DIV1 neuron #21_all.nd2:WT DIV1 neuron #21_all_Minimum	59.769	58.694	3	137	30.267	17.067	28.267	30.133	3508.07	197329
640 Tracings
Image	Tracing	Cluster	Type	Label	Length [micron]	Mean Val [a.u.]	SD Val [a.u.]	Min Val [a.u.]	Max Val [a.u.]
MAX_WT DIV1 neuron #21_640_1x1	N1	Default	Primary	Default	11.322	78.081	24.446	14	102
MAX_WT DIV1 neuron #21_640_1x1	N2	Default	Primary	Default	8.136	79.107	16.893	45	102
MAX_WT DIV1 neuron #21_640_1x1	N3	Default	Primary	Default	6.67	33.652	19.218	2	72
MAX_WT DIV1 neuron #21_640_1x1	N4	Default	Primary	Default	14.312	55.915	21.553	18	102
MAX_WT DIV1 neuron #21_640_1x1	N5	Default	Primary	Default	6.606	24.391	16.496	4	79
640 Groups
Image	Cluster	Type	Count	Sum Len [micron]	Mean Len [micron]	SD Len [micron]	Min Len [micron]	Max Len [micron]	Mean Val [a.u.]	SD Val [a.u.]	Min Val [a.u.]	Max Val [a.u.]
MAX_WT DIV1 neuron #21_640_1x1	All	All	5	47.046	9.409	3.342	6.606	14.312	58.065	28.916	2	102
Image 12
WT DIV1 neuron #22_all
Electroporation efficency by measuring GFP efficency with "Minimum" ROI (only covering soma)
		Label	Area	Mean	Min	Max	BX	BY	Width	Height	IntDen	RawIntDen
488	1	C1-MAX_WT DIV1 neuron #22_all.nd2:WT DIV1 neuron #22_all_Minimum	50.027	123.491	90	255	20	26.8	12.4	29.733	6177.87	347505
640	2	C2-MAX_WT DIV1 neuron #22_all.nd2:WT DIV1 neuron #22_all_Minimum	50.027	73.237	11	255	20	26.8	12.4	29.733	3663.82	206090
405	3	C3-MAX_WT DIV1 neuron #22_all.nd2:WT DIV1 neuron #22_all_Minimum	50.027	55.528	2	126	20	26.8	12.4	29.733	2777.88	156256
640 Tracings
Image	Tracing	Cluster	Type	Label	Length [micron]	Mean Val [a.u.]	SD Val [a.u.]	Min Val [a.u.]	Max Val [a.u.]
MAX_WT DIV1 neuron #22_640_1x1	N1	Default	Primary	Default	22.689	90.44	19.147	31	102
MAX_WT DIV1 neuron #22_640_1x1	N2	Default	Primary	Default	7.602	49.082	28.148	15	102
MAX_WT DIV1 neuron #22_640_1x1	N3	Default	Primary	Default	3.871	25.871	10.978	8	50
MAX_WT DIV1 neuron #22_640_1x1	N4	Default	Primary	Default	4.29	28.129	19.106	11	98
640 Groups
Image	Cluster	Type	Count	Sum Len [micron]	Mean Len [micron]	SD Len [micron]	Min Len [micron]	Max Len [micron]	Mean Val [a.u.]	SD Val [a.u.]	Min Val [a.u.]	Max Val [a.u.]
MAX_WT DIV1 neuron #22_640_1x1	All	All	4	38.452	9.613	8.876	3.871	22.689	68.1	33.969	8	102
Image 13
WT DIV1 neuron #23_all
Electroporation efficency by measuring GFP efficency with "Minimum" ROI (only covering soma)
		Label	Area	Mean	Min	Max	BX	BY	Width	Height	IntDen	RawIntDen
488	1	C1-MAX_WT DIV1 neuron #23_all.nd2:WT DIV1 neuron #23_all_Minimum	59.733	136.615	85	255	24.4	23.067	18.267	27.733	8160.46	459026
640	2	C2-MAX_WT DIV1 neuron #23_all.nd2:WT DIV1 neuron #23_all_Minimum	59.733	75.937	19	255	24.4	23.067	18.267	27.733	4535.95	255147
405	3	C3-MAX_WT DIV1 neuron #23_all.nd2:WT DIV1 neuron #23_all_Minimum	59.733	52.49	2	105	24.4	23.067	18.267	27.733	3135.41	176367
640 Tracings
Image	Tracing	Cluster	Type	Label	Length [micron]	Mean Val [a.u.]	SD Val [a.u.]	Min Val [a.u.]	Max Val [a.u.]
MAX_WT DIV1 neuron #23_640_1x1	N1	Default	Primary	Default	9.603	33.705	21.516	6	97
MAX_WT DIV1 neuron #23_640_1x1	N2	Default	Primary	Default	22.447	99.205	9.912	47	102
640 Groups
Image	Cluster	Type	Count	Sum Len [micron]	Mean Len [micron]	SD Len [micron]	Min Len [micron]	Max Len [micron]	Mean Val [a.u.]	SD Val [a.u.]	Min Val [a.u.]	Max Val [a.u.]
MAX_WT DIV1 neuron #23_640_1x1	All	All	2	32.05	16.025	9.082	9.603	22.447	80.793	32.713	6	102
Image 14
WT DIV1 neuron #24_all
Electroporation efficency by measuring GFP efficency with "Minimum" ROI (only covering soma)
		Label	Area	Mean	Min	Max	BX	BY	Width	Height	IntDen	RawIntDen
488	1	C1-MAX_WT DIV1 neuron #24_all.nd2:WT DIV1 neuron #24_all_Minimum	48.996	120.152	85	255	14.933	13.867	35.467	44.667	5886.93	331140
640	2	C2-MAX_WT DIV1 neuron #24_all.nd2:WT DIV1 neuron #24_all_Minimum	48.996	90.898	7	255	14.933	13.867	35.467	44.667	4453.58	250514
405	3	C3-MAX_WT DIV1 neuron #24_all.nd2:WT DIV1 neuron #24_all_Minimum	48.996	54.233	3	130	14.933	13.867	35.467	44.667	2657.16	149465
640 Tracings
Image	Tracing	Cluster	Type	Label	Length [micron]	Mean Val [a.u.]	SD Val [a.u.]	Min Val [a.u.]	Max Val [a.u.]
MAX_WT DIV1 neuron #24_640_1x1	N1	Default	Primary	Default	7.914	44.941	19.674	16	90
MAX_WT DIV1 neuron #24_640_1x1	N2	Default	Primary	Default	50.456	94.318	15.693	23	102
MAX_WT DIV1 neuron #24_640_1x1	N3	Default	Primary	Default	10.015	93.493	17.054	31	102
640 Groups
Image	Cluster	Type	Count	Sum Len [micron]	Mean Len [micron]	SD Len [micron]	Min Len [micron]	Max Len [micron]	Mean Val [a.u.]	SD Val [a.u.]	Min Val [a.u.]	Max Val [a.u.]
MAX_WT DIV1 neuron #24_640_1x1	All	All	3	68.385	22.795	23.978	7.914	50.456	88.501	22.708	16	102
Image 15
WT DIV1 neuron #25_all
Electroporation efficency by measuring GFP efficency with "Minimum" ROI (only covering soma)
		Label	Area	Mean	Min	Max	BX	BY	Width	Height	IntDen	RawIntDen
488	1	C1-MAX_WT DIV1 neuron #25_all.nd2:WT DIV1 neuron #25_all_Minimum	54.578	129.826	83	255	14.133	22.933	51.867	34.533	7085.62	398566
640	2	C2-MAX_WT DIV1 neuron #25_all.nd2:WT DIV1 neuron #25_all_Minimum	54.578	100.797	13	255	14.133	22.933	51.867	34.533	5501.28	309447
405	3	C3-MAX_WT DIV1 neuron #25_all.nd2:WT DIV1 neuron #25_all_Minimum	54.578	78.063	3	182	14.133	22.933	51.867	34.533	4260.5	239653
640 Tracings
Image	Tracing	Cluster	Type	Label	Length [micron]	Mean Val [a.u.]	SD Val [a.u.]	Min Val [a.u.]	Max Val [a.u.]
MAX_WT DIV1 neuron #25_640_1x1	N1	Default	Primary	Default	4.941	66.889	19.927	33	102
MAX_WT DIV1 neuron #25_640_1x1	N2	Default	Primary	Default	48.916	81.515	21.786	17	102
MAX_WT DIV1 neuron #25_640_1x1	N3	Default	Primary	Default	15.462	69.538	28.234	17	102
MAX_WT DIV1 neuron #25_640_1x1	N4	Default	Primary	Default	7.51	51.554	28.108	7	102
MAX_WT DIV1 neuron #25_640_1x1	N5	Default	Primary	Default	12.103	68.974	26.212	12	102
MAX_WT DIV1 neuron #25_640_1x1	N6	Default	Secondary	Default	13.495	41.907	16.219	8	84
640 Groups
Image	Cluster	Type	Count	Sum Len [micron]	Mean Len [micron]	SD Len [micron]	Min Len [micron]	Max Len [micron]	Mean Val [a.u.]	SD Val [a.u.]	Min Val [a.u.]	Max Val [a.u.]
MAX_WT DIV1 neuron #25_640_1x1	All	All	6	102.428	17.071	16.079	4.941	48.916	69.482	27.129	7	102
Image 16
WT DIV1 neuron #26_all
Electroporation efficency by measuring GFP efficency with "Minimum" ROI (only covering soma)
		Label	Area	Mean	Min	Max	BX	BY	Width	Height	IntDen	RawIntDen
488	1	C1-MAX_WT DIV1 neuron #26_all.nd2:WT DIV1 neuron #26_all_Minimum	62.489	140.163	86	255	33.6	24.8	11.733	14.667	8758.65	492674
640	2	C2-MAX_WT DIV1 neuron #26_all.nd2:WT DIV1 neuron #26_all_Minimum	62.489	87.817	15	255	33.6	24.8	11.733	14.667	5487.59	308677
405	3	C3-MAX_WT DIV1 neuron #26_all.nd2:WT DIV1 neuron #26_all_Minimum	62.489	108.477	5	230	33.6	24.8	11.733	14.667	6778.61	381297
640 Tracings
Image	Tracing	Cluster	Type	Label	Length [micron]	Mean Val [a.u.]	SD Val [a.u.]	Min Val [a.u.]	Max Val [a.u.]
MAX_WT DIV1 neuron #26_640_1x1	N1	Default	Primary	Default	6.946	56.065	24.19	20	98
MAX_WT DIV1 neuron #26_640_1x1	N2	Default	Primary	Default	9.375	88.056	17.364	33	102
MAX_WT DIV1 neuron #26_640_1x1	N3	Default	Primary	Default	13.291	62.512	28.319	16	102
MAX_WT DIV1 neuron #26_640_1x1	N4	Default	Primary	Default	16.401	37.792	31.446	0	102
640 Groups
Image	Cluster	Type	Count	Sum Len [micron]	Mean Len [micron]	SD Len [micron]	Min Len [micron]	Max Len [micron]	Mean Val [a.u.]	SD Val [a.u.]	Min Val [a.u.]	Max Val [a.u.]
MAX_WT DIV1 neuron #26_640_1x1	All	All	4	46.012	11.503	4.182	6.946	16.401	59.289	32.563	0	102
Image 17
WT DIV1 neuron #29_all
Electroporation efficency by measuring GFP efficency with "Minimum" ROI (only covering soma)
		Label	Area	Mean	Min	Max	BX	BY	Width	Height	IntDen	RawIntDen
488	1	C1-MAX_WT DIV1 neuron #29_all.nd2:WT DIV1 neuron #29_all_Minimum	93.209	139.195	90	255	21.733	17.733	45.733	40.4	12974.2	729799
640	2	C2-MAX_WT DIV1 neuron #29_all.nd2:WT DIV1 neuron #29_all_Minimum	93.209	76.081	7	245	21.733	17.733	45.733	40.4	7091.43	398893
405	3	C3-MAX_WT DIV1 neuron #29_all.nd2:WT DIV1 neuron #29_all_Minimum	93.209	33.638	2	86	21.733	17.733	45.733	40.4	3135.4	176366
640 Tracings
Image	Tracing	Cluster	Type	Label	Length [micron]	Mean Val [a.u.]	SD Val [a.u.]	Min Val [a.u.]	Max Val [a.u.]
MAX_WT DIV1 neuron #29_640_1x1	N1	Default	Primary	Default	46.858	80.203	26.502	16	102
MAX_WT DIV1 neuron #29_640_1x1	N2	Default	Primary	Default	5.186	55.634	26.053	22	102
MAX_WT DIV1 neuron #29_640_1x1	N3	Default	Primary	Default	19.803	49.027	19.592	18	102
MAX_WT DIV1 neuron #29_640_1x1	N4	Default	Primary	Default	7.718	45.429	21.406	11	87
MAX_WT DIV1 neuron #29_640_1x1	N5	Default	Secondary	Default	9.851	86.69	24.912	14	102
640 Groups
Image	Cluster	Type	Count	Sum Len [micron]	Mean Len [micron]	SD Len [micron]	Min Len [micron]	Max Len [micron]	Mean Val [a.u.]	SD Val [a.u.]	Min Val [a.u.]	Max Val [a.u.]
MAX_WT DIV1 neuron #29_640_1x1	All	All	5	89.415	17.883	17.119	5.186	46.858	68.46	29.071	11	102
Image 18
WT DIV1 neuron #29_all
Electroporation efficency by measuring GFP efficency with "Minimum" ROI (only covering soma)
		Label	Area	Mean	Min	Max	BX	BY	Width	Height	IntDen	RawIntDen
488	1	C1-MAX_WT DIV1 neuron #30_all.nd2:WT DIV1 neuron #30_all_Minimum	49.102	130.361	81	255	10.133	14.267	28.8	32.667	6401.01	360057
640	2	C2-MAX_WT DIV1 neuron #30_all.nd2:WT DIV1 neuron #30_all_Minimum	49.102	67.271	7	255	10.133	14.267	28.8	32.667	3303.16	185803
405	3	C3-MAX_WT DIV1 neuron #30_all.nd2:WT DIV1 neuron #30_all_Minimum	49.102	79.996	3	172	10.133	14.267	28.8	32.667	3927.96	220948
640 Tracings
Image	Tracing	Cluster	Type	Label	Length [micron]	Mean Val [a.u.]	SD Val [a.u.]	Min Val [a.u.]	Max Val [a.u.]
MAX_WT DIV1 neuron #30_640_1x1	N1	Default	Primary	Default	19.743	73.766	29.227	9	102
MAX_WT DIV1 neuron #30_640_1x1	N2	Default	Primary	Default	34.847	97.956	11.665	33	102
640 Groups
Image	Cluster	Type	Count	Sum Len [micron]	Mean Len [micron]	SD Len [micron]	Min Len [micron]	Max Len [micron]	Mean Val [a.u.]	SD Val [a.u.]	Min Val [a.u.]	Max Val [a.u.]
MAX_WT DIV1 neuron #30_640_1x1	All	All	2	54.589	27.295	10.68	19.743	34.847	88.662	23.435	9	102

## Sheet: V409I DIV1
V409 neuron prep_08.24.2020
* all .nd2 images were converted into an 8-bit grayscale .tiff in order to be analyzed in NeuronJ (imageJ plugin) *
Scale is set at 7.5µm/pixel
Image 1
VI DIV1 neuron #3_all
Electroporation efficency by measuring GFP efficency with "Minimum" ROI (only covering soma)
		Label	Area	Mean	Min	Max	BX	BY	Width	Height	IntDen	RawIntDen
488	1	C1-MAX_VI DIV1 neuron #3_all.nd2:VI DIV1 neuron #3_all_Minimum	49.404	116.606	62	255	24.8	40.667	10.8	9.2	5760.87	324049
640	2	C2-MAX_VI DIV1 neuron #3_all.nd2:VI DIV1 neuron #3_all_Minimum	49.404	85.463	13	255	24.8	40.667	10.8	9.2	4222.26	237502
405	3	C3-MAX_VI DIV1 neuron #3_all.nd2:VI DIV1 neuron #3_all_Minimum	49.404	57.242	8	166	24.8	40.667	10.8	9.2	2828.02	159076
640 Tracings
Image	Tracing	Cluster	Type	Label	Length [micron]	Mean Val [a.u.]	SD Val [a.u.]	Min Val [a.u.]	Max Val [a.u.]
MAX_VI DIV1 neuron #3_640_1x1	N1	Default	Primary	Default	25.585	8.149	6.122	0	21
MAX_VI DIV1 neuron #3_640_1x1	N2	Default	Primary	Default	14.227	11.708	4.971	4	23
640 Groups
Image	Cluster	Type	Count	Sum Len [micron]	Mean Len [micron]	SD Len [micron]	Min Len [micron]	Max Len [micron]	Mean Val [a.u.]	SD Val [a.u.]	Min Val [a.u.]	Max Val [a.u.]
MAX_VI DIV1 neuron #3_640_1x1	All	All	2	39.811	19.906	8.032	14.227	25.585	9.479	5.964	0	23
Image 2
VI DIV1 neuron #6_all
Electroporation efficency by measuring GFP efficency with "Minimum" ROI (only covering soma)
		Label	Area	Mean	Min	Max	BX	BY	Width	Height	IntDen	RawIntDen
488	1	C1-MAX_VI DIV1 neuron #6_all.nd2:VI DIV1 neuron #6_all_Minimum	90.471	69.423	20	237	0	1.067	68.267	35.2	6280.78	353294
640	2	C2-MAX_VI DIV1 neuron #6_all.nd2:VI DIV1 neuron #6_all_Minimum	90.471	45.321	9	226	0	1.067	68.267	35.2	4100.25	230639
405	3	C3-MAX_VI DIV1 neuron #6_all.nd2:VI DIV1 neuron #6_all_Minimum	90.471	106.942	58	255	0	1.067	68.267	35.2	9675.13	544226
640 Tracings
Image	Tracing	Cluster	Type	Label	Length [micron]	Mean Val [a.u.]	SD Val [a.u.]	Min Val [a.u.]	Max Val [a.u.]
MAX_VI DIV1 neuron #6_640_1x1	N1	Default	Primary	Default	53.529	9.325	3.626	2	23
MAX_VI DIV1 neuron #6_640_1x1	N2	Default	Primary	Default	17.528	11.286	4.431	3	31
MAX_VI DIV1 neuron #6_640_1x1	N3	Default	Primary	Default	10.623	11.704	3.878	4	24
640 Groups
Image	Cluster	Type	Count	Sum Len [micron]	Mean Len [micron]	SD Len [micron]	Min Len [micron]	Max Len [micron]	Mean Val [a.u.]	SD Val [a.u.]	Min Val [a.u.]	Max Val [a.u.]
MAX_VI DIV1 neuron #6_640_1x1	All	All	3	81.68	27.227	23.039	10.623	53.529	10.084	3.983	2	31
Image 3
VI DIV1 neuron #7_all
Electroporation efficency by measuring GFP efficency with "Minimum" ROI (only covering soma)
		Label	Area	Mean	Min	Max	BX	BY	Width	Height	IntDen	RawIntDen
488	1	C1-MAX_VI DIV1 neuron #7_all.nd2:VI DIV1 neuron #7_all_Minimum	64.373	1305	908	2577	31.067	20	21.333	12.133	84006.9	4725389
640	2	C2-MAX_VI DIV1 neuron #7_all.nd2:VI DIV1 neuron #7_all_Minimum	64.373	2359.29	1041	5507	31.067	20	21.333	12.133	151875	8542990
405	3	C3-MAX_VI DIV1 neuron #7_all.nd2:VI DIV1 neuron #7_all_Minimum	64.373	1724.6	277	4910	31.067	20	21.333	12.133	111018	6244764
640 Tracings
Image	Tracing	Cluster	Type	Label	Length [micron]	Mean Val [a.u.]	SD Val [a.u.]	Min Val [a.u.]	Max Val [a.u.]
MAX_VI DIV1 neuron #7_640_1x1	N1	Default	Primary	Default	4.28	24.417	7.681	9	40
MAX_VI DIV1 neuron #7_640_1x1	N2	Default	Primary	Default	14.206	25.584	12.079	6	57
MAX_VI DIV1 neuron #7_640_1x1	N3	Default	Primary	Default	9.408	36.773	19.042	10	93
MAX_VI DIV1 neuron #7_640_1x1	N4	Default	Primary	Default	5.611	25.683	6.627	16	45
MAX_VI DIV1 neuron #7_640_1x1	N5	Default	Primary	Default	6.253	24.522	6.612	11	42
MAX_VI DIV1 neuron #7_640_1x1	N6	Default	Primary	Default	40.368	37.691	26.757	6	102
MAX_VI DIV1 neuron #7_640_1x1	N7	Default	Primary	Default	12.854	30.321	14.629	8	70
MAX_VI DIV1 neuron #7_640_1x1	N8	Default	Primary	Default	7.814	33.49	15.036	6	65
640 Groups
Image	Cluster	Type	Count	Sum Len [micron]	Mean Len [micron]	SD Len [micron]	Min Len [micron]	Max Len [micron]	Mean Val [a.u.]	SD Val [a.u.]	Min Val [a.u.]	Max Val [a.u.]
MAX_VI DIV1 neuron #7_640_1x1	All	All	8	100.794	12.599	11.742	4.28	40.368	32.277	20.171	6	102
Image 4
VI DIV1 neuron #8_all
Electroporation efficency by measuring GFP efficency with "Minimum" ROI (only covering soma)
		Label	Area	Mean	Min	Max	BX	BY	Width	Height	IntDen	RawIntDen
488	1	C1-MAX_VI DIV1 neuron #8_all.nd2:VI DIV1 neuron #8_all_Minimum	52.729	101.642	34	255	31.467	27.6	9.067	9.467	5359.47	301470
640	2	C2-MAX_VI DIV1 neuron #8_all.nd2:VI DIV1 neuron #8_all_Minimum	52.729	43.812	14	170	31.467	27.6	9.067	9.467	2310.17	129947
405	3	C3-MAX_VI DIV1 neuron #8_all.nd2:VI DIV1 neuron #8_all_Minimum	52.729	70.574	38	144	31.467	27.6	9.067	9.467	3721.28	209322
640 Tracings
Image	Tracing	Cluster	Type	Label	Length [micron]	Mean Val [a.u.]	SD Val [a.u.]	Min Val [a.u.]	Max Val [a.u.]
MAX_VI DIV1 neuron #8_640_1x1	N1	Default	Primary	Default	9.004	12.738	4.946	4	26
MAX_VI DIV1 neuron #8_640_1x1	N2	Default	Primary	Default	6.703	9.683	2.514	4	15
MAX_VI DIV1 neuron #8_640_1x1	N3	Default	Primary	Default	18.521	10.298	5.118	1	22
MAX_VI DIV1 neuron #8_640_1x1	N4	Default	Primary	Default	17.841	11.389	4.167	4	23
MAX_VI DIV1 neuron #8_640_1x1	N5	Default	Primary	Default	9.69	8.924	3.306	4	19
MAX_VI DIV1 neuron #8_640_1x1	N6	Default	Primary	Default	8.251	9.951	3.985	2	18
640 Groups
Image	Cluster	Type	Count	Sum Len [micron]	Mean Len [micron]	SD Len [micron]	Min Len [micron]	Max Len [micron]	Mean Val [a.u.]	SD Val [a.u.]	Min Val [a.u.]	Max Val [a.u.]
MAX_VI DIV1 neuron #8_640_1x1	All	All	6	70.01	11.668	5.146	6.703	18.521	10.62	4.426	1	26
Image 5
VI DIV1 neuron #9_all
Electroporation efficency by measuring GFP efficency with "Minimum" ROI (only covering soma)
		Label	Area	Mean	Min	Max	BX	BY	Width	Height	IntDen	RawIntDen
488	1	C1-MAX_VI DIV1 neuron #9_all.nd2:VI DIV1 neuron #9_all_Default	56.818	97.414	64	255	15.867	25.867	32.8	26.4	5534.84	311335
640	2	C2-MAX_VI DIV1 neuron #9_all.nd2:VI DIV1 neuron #9_all_Default	56.818	70.634	4	255	15.867	25.867	32.8	26.4	4013.26	225746
405	3	C3-MAX_VI DIV1 neuron #9_all.nd2:VI DIV1 neuron #9_all_Default	56.818	50.926	6	162	15.867	25.867	32.8	26.4	2893.49	162759
640 Tracings
Image	Tracing	Cluster	Type	Label	Length [micron]	Mean Val [a.u.]	SD Val [a.u.]	Min Val [a.u.]	Max Val [a.u.]
MAX_VI DIV1 neuron #9_640_1x1	N1	Default	Primary	Default	14.451	8.238	4.025	2	19
MAX_VI DIV1 neuron #9_640_1x1	N2	Default	Primary	Default	10.648	5.986	2.964	1	13
MAX_VI DIV1 neuron #9_640_1x1	N3	Default	Primary	Default	10.004	15.718	5.169	7	30
MAX_VI DIV1 neuron #9_640_1x1	N4	Default	Primary	Default	6.961	6.02	4.067	2	20
640 Groups
Image	Cluster	Type	Count	Sum Len [micron]	Mean Len [micron]	SD Len [micron]	Min Len [micron]	Max Len [micron]	Mean Val [a.u.]	SD Val [a.u.]	Min Val [a.u.]	Max Val [a.u.]
MAX_VI DIV1 neuron #9_640_1x1	All	All	4	42.064	10.516	3.077	6.961	14.451	9.116	5.631	1	30
Image 6
VI DIV1 neuron #11_all
Electroporation efficency by measuring GFP efficency with "Minimum" ROI (only covering soma)
		Label	Area	Mean	Min	Max	BX	BY	Width	Height	IntDen	RawIntDen
488	1	C1-MAX_VI DIV1 neuron #11_all.nd2:VI DIV1 neuron #11_all_Minimum	110.578	125.038	71	255	30.267	20.4	11.467	14.8	13826.4	777736
640	2	C2-MAX_VI DIV1 neuron #11_all.nd2:VI DIV1 neuron #11_all_Minimum	110.578	93.497	10	255	30.267	20.4	11.467	14.8	10338.7	581554
405	3	C3-MAX_VI DIV1 neuron #11_all.nd2:VI DIV1 neuron #11_all_Minimum	110.578	34.732	3	122	30.267	20.4	11.467	14.8	3840.59	216033
640 Tracings
Image	Tracing	Cluster	Type	Label	Length [micron]	Mean Val [a.u.]	SD Val [a.u.]	Min Val [a.u.]	Max Val [a.u.]
MAX_VI DIV1 neuron #11_640_1x1	N1	Default	Primary	Default	17.49	17.372	8.827	4	38
MAX_VI DIV1 neuron #11_640_1x1	N2	Default	Primary	Default	18.132	18.793	12.15	1	41
640 Groups
Image	Cluster	Type	Count	Sum Len [micron]	Mean Len [micron]	SD Len [micron]	Min Len [micron]	Max Len [micron]	Mean Val [a.u.]	SD Val [a.u.]	Min Val [a.u.]	Max Val [a.u.]
MAX_VI DIV1 neuron #11_640_1x1	All	All	2	35.623	17.811	0.454	17.49	18.132	18.083	10.621	1	41
Image 7
VI DIV1 neuron #12_all
Electroporation efficency by measuring GFP efficency with "Minimum" ROI (only covering soma)
		Label	Area	Mean	Min	Max	BX	BY	Width	Height	IntDen	RawIntDen
488	1	C1-MAX_VI DIV1 neuron #12_all.nd2:VI DIV1 neuron #12_all_Minimum	94.649	135.821	93	255	24.667	24.8	22.4	16.8	12855.3	723110
640	2	C2-MAX_VI DIV1 neuron #12_all.nd2:VI DIV1 neuron #12_all_Minimum	94.649	97.993	18	255	24.667	24.8	22.4	16.8	9274.93	521715
405	3	C3-MAX_VI DIV1 neuron #12_all.nd2:VI DIV1 neuron #12_all_Minimum	94.649	79.977	4	234	24.667	24.8	22.4	16.8	7569.71	425796
640 Tracings
Image	Tracing	Cluster	Type	Label	Length [micron]	Mean Val [a.u.]	SD Val [a.u.]	Min Val [a.u.]	Max Val [a.u.]
MAX_VI DIV1 neuron #12_640_1x1	N1	Default	Primary	Default	9.597	14.676	5.096	4	28
MAX_VI DIV1 neuron #12_640_1x1	N2	Default	Primary	Default	18.002	35.115	19.255	3	82
MAX_VI DIV1 neuron #12_640_1x1	N3	Default	Primary	Default	16.806	21.236	10.194	4	44
MAX_VI DIV1 neuron #12_640_1x1	N4	Default	Primary	Default	9.273	25.357	5.919	11	41
MAX_VI DIV1 neuron #12_640_1x1	N5	Default	Primary	Default	12.171	36.626	7.063	20	50
MAX_VI DIV1 neuron #12_640_1x1	N6	Default	Primary	Default	8.824	14.869	5.818	2	26
640 Groups
Image	Cluster	Type	Count	Sum Len [micron]	Mean Len [micron]	SD Len [micron]	Min Len [micron]	Max Len [micron]	Mean Val [a.u.]	SD Val [a.u.]	Min Val [a.u.]	Max Val [a.u.]
MAX_VI DIV1 neuron #12_640_1x1	All	All	6	74.673	12.446	4.031	8.824	18.002	26.266	14.587	2	82
Image 8
VI DIV1 neuron #13_all
Electroporation efficency by measuring GFP efficency with "Minimum" ROI (only covering soma)
		Label	Area	Mean	Min	Max	BX	BY	Width	Height	IntDen	RawIntDen
488	1	C1-MAX_VI DIV1 neuron #13_all.nd2:VI DIV1 neuron #13_all_Minimum	61.458	138.331	88	255	28.533	24	7.733	30	8501.49	478209
640	2	C2-MAX_VI DIV1 neuron #13_all.nd2:VI DIV1 neuron #13_all_Minimum	61.458	87.203	17	255	28.533	24	7.733	30	5359.31	301461
405	3	C3-MAX_VI DIV1 neuron #13_all.nd2:VI DIV1 neuron #13_all_Minimum	61.458	51.941	2	119	28.533	24	7.733	30	3192.18	179560
640 Tracings
Image	Tracing	Cluster	Type	Label	Length [micron]	Mean Val [a.u.]	SD Val [a.u.]	Min Val [a.u.]	Max Val [a.u.]
MAX_VI DIV1 neuron #13_640_1x1	N1	Default	Primary	Default	18.705	37.801	17.078	6	66
MAX_VI DIV1 neuron #13_640_1x1	N2	Default	Primary	Default	11.866	14.116	5.559	5	26
MAX_VI DIV1 neuron #13_640_1x1	N3	Default	Primary	Default	21.224	40.369	18.783	4	72
MAX_VI DIV1 neuron #13_640_1x1	N4	Default	Primary	Default	28.841	31.838	15.481	2	72
MAX_VI DIV1 neuron #13_640_1x1	N5	Default	Primary	Default	9.738	14.803	6.439	3	27
640 Groups
Image	Cluster	Type	Count	Sum Len [micron]	Mean Len [micron]	SD Len [micron]	Min Len [micron]	Max Len [micron]	Mean Val [a.u.]	SD Val [a.u.]	Min Val [a.u.]	Max Val [a.u.]
MAX_VI DIV1 neuron #13_640_1x1	All	All	5	90.374	18.075	7.653	9.738	28.841	30.945	17.991	2	72
Image 9
VI DIV1 neuron #14_all
Electroporation efficency by measuring GFP efficency with "Minimum" ROI (only covering soma)
		Label	Area	Mean	Min	Max	BX	BY	Width	Height	IntDen	RawIntDen
488	1	C1-MAX_VI DIV1 neuron #14_all.nd2:VI DIV1 neuron #14_all_Minimum	75.893	132.616	89	255	20.933	3.733	28.933	37.6	10064.7	566138
640	2	C2-MAX_VI DIV1 neuron #14_all.nd2:VI DIV1 neuron #14_all_Minimum	75.893	119.383	17	255	20.933	3.733	28.933	37.6	9060.34	509644
405	3	C3-MAX_VI DIV1 neuron #14_all.nd2:VI DIV1 neuron #14_all_Minimum	75.893	41.236	2	156	20.933	3.733	28.933	37.6	3129.55	176037
640 Tracings
Image	Tracing	Cluster	Type	Label	Length [micron]	Mean Val [a.u.]	SD Val [a.u.]	Min Val [a.u.]	Max Val [a.u.]
MAX_VI DIV1 neuron #14_640_1x1	N1	Default	Primary	Default	23.615	30.468	14.603	2	64
MAX_VI DIV1 neuron #14_640_1x1	N2	Default	Primary	Default	6.921	14.122	7.557	2	32
MAX_VI DIV1 neuron #14_640_1x1	N3	Default	Primary	Default	5.961	21.488	6.637	11	36
640 Groups
Image	Cluster	Type	Count	Sum Len [micron]	Mean Len [micron]	SD Len [micron]	Min Len [micron]	Max Len [micron]	Mean Val [a.u.]	SD Val [a.u.]	Min Val [a.u.]	Max Val [a.u.]
MAX_VI DIV1 neuron #14_640_1x1	All	All	3	36.497	12.166	9.927	5.961	23.615	26.364	14.128	2	64
Image 10
VI DIV1 neuron #15_all
Electroporation efficency by measuring GFP efficency with "Minimum" ROI (only covering soma)
		Label	Area	Mean	Min	Max	BX	BY	Width	Height	IntDen	RawIntDen
488	1	C1-MAX_VI DIV1 neuron #15_all.nd2:VI DIV1 neuron #15_all_Minimum	67.751	149.194	101	255	6.133	12.133	44.4	16.267	10108.1	568578
640	2	C2-MAX_VI DIV1 neuron #15_all.nd2:VI DIV1 neuron #15_all_Minimum	67.751	110.039	16	255	6.133	12.133	44.4	16.267	7455.24	419357
405	3	C3-MAX_VI DIV1 neuron #15_all.nd2:VI DIV1 neuron #15_all_Minimum	67.751	113.701	5	255	6.133	12.133	44.4	16.267	7703.4	433316
640 Tracings
Image	Tracing	Cluster	Type	Label	Length [micron]	Mean Val [a.u.]	SD Val [a.u.]	Min Val [a.u.]	Max Val [a.u.]
MAX_VI DIV1 neuron #15_640_1x1	N1	Default	Primary	Default	20.17	68.015	28.181	20	100
MAX_VI DIV1 neuron #15_640_1x1	N2	Default	Primary	Default	35.811	70.337	28.35	6	97
640 Groups
Image	Cluster	Type	Count	Sum Len [micron]	Mean Len [micron]	SD Len [micron]	Min Len [micron]	Max Len [micron]	Mean Val [a.u.]	SD Val [a.u.]	Min Val [a.u.]	Max Val [a.u.]
MAX_VI DIV1 neuron #15_640_1x1	All	All	2	55.981	27.99	11.059	20.17	35.811	69.561	28.279	6	100
Image 11
VI DIV1 neuron #16_all
Electroporation efficency by measuring GFP efficency with "Minimum" ROI (only covering soma)
		Label	Area	Mean	Min	Max	BX	BY	Width	Height	IntDen	RawIntDen
488	1	C1-MAX_VI DIV1 neuron #16_all.nd2:VI DIV1 neuron #16_all_Minimum	76.871	148.981	99	255	25.6	18.667	13.867	24.133	11452.3	644193
640	2	C2-MAX_VI DIV1 neuron #16_all.nd2:VI DIV1 neuron #16_all_Minimum	76.871	93.025	28	255	25.6	18.667	13.867	24.133	7150.9	402238
405	3	C3-MAX_VI DIV1 neuron #16_all.nd2:VI DIV1 neuron #16_all_Minimum	76.871	53.122	2	151	25.6	18.667	13.867	24.133	4083.54	229699
640 Tracings
Image	Tracing	Cluster	Type	Label	Length [micron]	Mean Val [a.u.]	SD Val [a.u.]	Min Val [a.u.]	Max Val [a.u.]
MAX_VI DIV1 neuron #16_640_1x1	N1	Default	Primary	Default	26.076	24.403	12.199	6	60
MAX_VI DIV1 neuron #16_640_1x1	N2	Default	Primary	Default	16.201	26.982	12.292	9	52
MAX_VI DIV1 neuron #16_640_1x1	N3	Default	Primary	Default	14.392	33.257	12.857	14	62
640 Groups
Image	Cluster	Type	Count	Sum Len [micron]	Mean Len [micron]	SD Len [micron]	Min Len [micron]	Max Len [micron]	Mean Val [a.u.]	SD Val [a.u.]	Min Val [a.u.]	Max Val [a.u.]
MAX_VI DIV1 neuron #16_640_1x1	All	All	3	56.668	18.889	6.289	14.392	26.076	27.446	12.886	6	62
Image 12
VI DIV1 neuron #18_all
Electroporation efficency by measuring GFP efficency with "Minimum" ROI (only covering soma)
		Label	Area	Mean	Min	Max	BX	BY	Width	Height	IntDen	RawIntDen
488	1	C1-MAX_VI DIV1 neuron #18_all.nd2:VI DIV1 neuron #18_all_Minimum	89.831	137.645	103	255	13.2	22.533	40.4	24.267	12364.8	695521
640	2	C2-MAX_VI DIV1 neuron #18_all.nd2:VI DIV1 neuron #18_all_Minimum	89.831	49.034	9	141	13.2	22.533	40.4	24.267	4404.78	247769
405	3	C3-MAX_VI DIV1 neuron #18_all.nd2:VI DIV1 neuron #18_all_Minimum	89.831	44.214	2	190	13.2	22.533	40.4	24.267	3971.79	223413
640 Tracings (left)
Image	Tracing	Cluster	Type	Label	Length [micron]	Mean Val [a.u.]	SD Val [a.u.]	Min Val [a.u.]	Max Val [a.u.]
MAX_VI DIV1 neuron #18_640_1x1	N1	Default	Primary	Default	18.029	12.603	6.642	2	30
MAX_VI DIV1 neuron #18_640_1x1	N2	Default	Primary	Default	29.318	22.991	9.063	6	48
640 Groups (left)
Image	Cluster	Type	Count	Sum Len [micron]	Mean Len [micron]	SD Len [micron]	Min Len [micron]	Max Len [micron]	Mean Val [a.u.]	SD Val [a.u.]	Min Val [a.u.]	Max Val [a.u.]
MAX_VI DIV1 neuron #18_640_1x1	All	All	2	47.347	23.673	7.983	18.029	29.318	19.107	9.648	2	48
640 Tracings (right)
Image	Tracing	Cluster	Type	Label	Length [micron]	Mean Val [a.u.]	SD Val [a.u.]	Min Val [a.u.]	Max Val [a.u.]
MAX_VI DIV1 neuron #18_640_1x1	N3	Default	Primary	Default	40.483	8.509	4.792	2	24
MAX_VI DIV1 neuron #18_640_1x1	N4	Default	Primary	Default	55.714	10.751	5.958	1	34
640 Groups (both)
Image	Cluster	Type	Count	Sum Len [micron]	Mean Len [micron]	SD Len [micron]	Min Len [micron]	Max Len [micron]	Mean Val [a.u.]	SD Val [a.u.]	Min Val [a.u.]	Max Val [a.u.]
MAX_VI DIV1 neuron #18_640_1x1	All	All	4	143.544	35.886	16.086	18.029	55.714	12.885	8.429	1	48
Image 13
VI DIV1 neuron #19_all
Electroporation efficency by measuring GFP efficency with "Minimum" ROI (only covering soma)
		Label	Area	Mean	Min	Max	BX	BY	Width	Height	IntDen	RawIntDen
488	1	C1-MAX_VI DIV1 neuron #19_all.nd2:VI DIV1 neuron #19_all_Minimum	61.653	109.524	74	255	4.4	5.867	60.667	52.667	6752.53	379830
640	2	C2-MAX_VI DIV1 neuron #19_all.nd2:VI DIV1 neuron #19_all_Minimum	61.653	81.325	7	255	4.4	5.867	60.667	52.667	5013.94	282034
405	3	C3-MAX_VI DIV1 neuron #19_all.nd2:VI DIV1 neuron #19_all_Minimum	61.653	64.43	3	175	4.4	5.867	60.667	52.667	3972.32	223443
640 Tracings
Image	Tracing	Cluster	Type	Label	Length [micron]	Mean Val [a.u.]	SD Val [a.u.]	Min Val [a.u.]	Max Val [a.u.]
MAX_VI DIV1 neuron #19_640_1x1	N1	Default	Primary	Default	14.744	22.708	10.368	5	46
MAX_VI DIV1 neuron #19_640_1x1	N2	Default	Primary	Default	11.279	19.419	9.8	3	46
MAX_VI DIV1 neuron #19_640_1x1	N3	Default	Primary	Default	51.234	27.95	9.563	8	62
MAX_VI DIV1 neuron #19_640_1x1	N4	Default	Primary	Default	8.772	16.879	8.037	5	42
MAX_VI DIV1 neuron #19_640_1x1	N5	Default	Primary	Default	17.402	19.614	10.044	2	46
640 Groups
Image	Cluster	Type	Count	Sum Len [micron]	Mean Len [micron]	SD Len [micron]	Min Len [micron]	Max Len [micron]	Mean Val [a.u.]	SD Val [a.u.]	Min Val [a.u.]	Max Val [a.u.]
MAX_VI DIV1 neuron #19_640_1x1	All	All	5	103.431	20.686	17.39	8.772	51.234	23.861	10.523	2	62
Image 14
VI DIV1 neuron #20_all
Electroporation efficency by measuring GFP efficency with "Minimum" ROI (only covering soma)
		Label	Area	Mean	Min	Max	BX	BY	Width	Height	IntDen	RawIntDen
488	1	C1-MAX_VI DIV1 neuron #20_all.nd2:VI DIV1 neuron #20_all_Minimum	75.698	141.071	95	255	19.2	11.333	27.867	34.667	10678.8	600682
640	2	C2-MAX_VI DIV1 neuron #20_all.nd2:VI DIV1 neuron #20_all_Minimum	75.698	116.737	14	255	19.2	11.333	27.867	34.667	8836.76	497068
405	3	C3-MAX_VI DIV1 neuron #20_all.nd2:VI DIV1 neuron #20_all_Minimum	75.698	47.709	3	179	19.2	11.333	27.867	34.667	3611.48	203146
640 Tracings
Image	Tracing	Cluster	Type	Label	Length [micron]	Mean Val [a.u.]	SD Val [a.u.]	Min Val [a.u.]	Max Val [a.u.]
MAX_VI DIV1 neuron #20_640_1x1	N1	Default	Primary	Default	21.136	33.205	13.86	6	58
MAX_VI DIV1 neuron #20_640_1x1	N2	Default	Primary	Default	5.201	15.968	5.902	6	27
MAX_VI DIV1 neuron #20_640_1x1	N3	Default	Primary	Default	6.734	25.413	6.833	15	52
640 Groups
Image	Cluster	Type	Count	Sum Len [micron]	Mean Len [micron]	SD Len [micron]	Min Len [micron]	Max Len [micron]	Mean Val [a.u.]	SD Val [a.u.]	Min Val [a.u.]	Max Val [a.u.]
MAX_VI DIV1 neuron #20_640_1x1	All	All	3	33.072	11.024	8.791	5.201	21.136	29.289	13.352	6	58
Image 15
VI DIV1 neuron #21_all
Electroporation efficency by measuring GFP efficency with "Minimum" ROI (only covering soma)
		Label	Area	Mean	Min	Max	BX	BY	Width	Height	IntDen	RawIntDen
488	1	C1-MAX_VI DIV1 neuron #21_all.nd2:VI DIV1 neuron #21_all_Minimum	56.196	147.2	100	255	24.8	23.733	7.6	13.6	8271.98	465299
640	2	C2-MAX_VI DIV1 neuron #21_all.nd2:VI DIV1 neuron #21_all_Minimum	56.196	85.587	17	255	24.8	23.733	7.6	13.6	4809.6	270540
405	3	C3-MAX_VI DIV1 neuron #21_all.nd2:VI DIV1 neuron #21_all_Minimum	56.196	56.389	2	125	24.8	23.733	7.6	13.6	3168.8	178245
640 Tracings
Image	Tracing	Cluster	Type	Label	Length [micron]	Mean Val [a.u.]	SD Val [a.u.]	Min Val [a.u.]	Max Val [a.u.]
MAX_VI DIV1 neuron #21_640_1x1	N1	Default	Primary	Default	18.501	37.801	17.223	6	72
MAX_VI DIV1 neuron #21_640_1x1	N2	Default	Primary	Default	11.815	15.14	5.376	4	26
MAX_VI DIV1 neuron #21_640_1x1	N3	Default	Primary	Default	19.928	41.374	17.293	8	76
MAX_VI DIV1 neuron #21_640_1x1	N4	Default	Primary	Default	9.833	14.672	6.582	2	28
MAX_VI DIV1 neuron #21_640_1x1	N5	Default	Secondary	Default	23.697	23.994	10.639	2	44
640 Groups
Image	Cluster	Type	Count	Sum Len [micron]	Mean Len [micron]	SD Len [micron]	Min Len [micron]	Max Len [micron]	Mean Val [a.u.]	SD Val [a.u.]	Min Val [a.u.]	Max Val [a.u.]
MAX_VI DIV1 neuron #21_640_1x1	All	All	5	83.774	16.755	5.78	9.833	23.697	28.949	17.032	2	76
Image 16
VI DIV1 neuron #22_all
Electroporation efficency by measuring GFP efficency with "Minimum" ROI (only covering soma)
		Label	Area	Mean	Min	Max	BX	BY	Width	Height	IntDen	RawIntDen
488	1	C1-MAX_VI DIV1 neuron #22_all.nd2:VI DIV1 neuron #22_all_Minimum	95.947	155.6	102	255	23.733	30	22.533	17.6	14929.3	839772
640	2	C2-MAX_VI DIV1 neuron #22_all.nd2:VI DIV1 neuron #22_all_Minimum	95.947	107.034	21	255	23.733	30	22.533	17.6	10269.5	577661
405	3	C3-MAX_VI DIV1 neuron #22_all.nd2:VI DIV1 neuron #22_all_Minimum	95.947	51.261	3	165	23.733	30	22.533	17.6	4918.35	276657
640 Tracings
Image	Tracing	Cluster	Type	Label	Length [micron]	Mean Val [a.u.]	SD Val [a.u.]	Min Val [a.u.]	Max Val [a.u.]
MAX_VI DIV1 neuron #22_640_1x1	N1	Default	Primary	Default	8.38	15.41	5.21	4	28
MAX_VI DIV1 neuron #22_640_1x1	N2	Default	Primary	Default	21.006	30.295	20.155	2	82
MAX_VI DIV1 neuron #22_640_1x1	N3	Default	Primary	Default	7.567	28.482	6.099	17	42
MAX_VI DIV1 neuron #22_640_1x1	N4	Default	Primary	Default	14.439	29.44	9.755	8	48
MAX_VI DIV1 neuron #22_640_1x1	N5	Default	Primary	Default	8.598	25.107	4.689	13	34
MAX_VI DIV1 neuron #22_640_1x1	N6	Default	Primary	Default	11.564	35.221	8.179	16	54
MAX_VI DIV1 neuron #22_640_1x1	N7	Default	Primary	Default	9.539	13.788	6.085	2	26
640 Groups
Image	Cluster	Type	Count	Sum Len [micron]	Mean Len [micron]	SD Len [micron]	Min Len [micron]	Max Len [micron]	Mean Val [a.u.]	SD Val [a.u.]	Min Val [a.u.]	Max Val [a.u.]
MAX_VI DIV1 neuron #22_640_1x1	All	All	7	81.093	11.585	4.769	7.567	21.006	26.658	13.898	2	82
Image 17
VI DIV1 neuron #23_all
Electroporation efficency by measuring GFP efficency with "Minimum" ROI (only covering soma)
		Label	Area	Mean	Min	Max	BX	BY	Width	Height	IntDen	RawIntDen
488	1	C1-MAX_VI DIV1 neuron #23_all.nd2:VI DIV1 neuron #23_all_Minimum	74.578	151.991	101	255	22	17.733	13.467	12.4	11335.1	637601
640	2	C2-MAX_VI DIV1 neuron #23_all.nd2:VI DIV1 neuron #23_all_Minimum	74.578	107.788	20	255	22	17.733	13.467	12.4	8038.56	452169
405	3	C3-MAX_VI DIV1 neuron #23_all.nd2:VI DIV1 neuron #23_all_Minimum	74.578	45.5	3	129	22	17.733	13.467	12.4	3393.26	190871
640 Tracings
Image	Tracing	Cluster	Type	Label	Length [micron]	Mean Val [a.u.]	SD Val [a.u.]	Min Val [a.u.]	Max Val [a.u.]
MAX_VI DIV1 neuron #23_640_1x1	N1	Default	Primary	Default	28.613	24.819	13.452	2	51
MAX_VI DIV1 neuron #23_640_1x1	N2	Default	Primary	Default	23.076	22	12.647	4	50
MAX_VI DIV1 neuron #23_640_1x1	N3	Default	Primary	Default	18.018	16.349	6.759	7	35
640 Groups
Image	Cluster	Type	Count	Sum Len [micron]	Mean Len [micron]	SD Len [micron]	Min Len [micron]	Max Len [micron]	Mean Val [a.u.]	SD Val [a.u.]	Min Val [a.u.]	Max Val [a.u.]
MAX_VI DIV1 neuron #23_640_1x1	All	All	3	69.707	23.236	5.299	18.018	28.613	21.797	12.302	2	51
Image 18
VI DIV1 neuron #24_all
Electroporation efficency by measuring GFP efficency with "Minimum" ROI (only covering soma)
		Label	Area	Mean	Min	Max	BX	BY	Width	Height	IntDen	RawIntDen
488	1	C1-MAX_VI DIV1 neuron #24_all.nd2:VI DIV1 neuron #24_all_Minimum	66.578	140.83	99	255	17.067	29.467	22.267	12.533	9376.18	527410
640	2	C2-MAX_VI DIV1 neuron #24_all.nd2:VI DIV1 neuron #24_all_Minimum	66.578	87.128	9	255	17.067	29.467	22.267	12.533	5800.82	326296
405	3	C3-MAX_VI DIV1 neuron #24_all.nd2:VI DIV1 neuron #24_all_Minimum	66.578	48.779	3	121	17.067	29.467	22.267	12.533	3247.63	182679
640 Tracings
Image	Tracing	Cluster	Type	Label	Length [micron]	Mean Val [a.u.]	SD Val [a.u.]	Min Val [a.u.]	Max Val [a.u.]
MAX_VI DIV1 neuron #24_640_1x1	N1	Default	Primary	Default	6.706	10.667	3.83	4	18
MAX_VI DIV1 neuron #24_640_1x1	N2	Default	Primary	Default	35.064	34.035	15.284	4	72
MAX_VI DIV1 neuron #24_640_1x1	N3	Default	Primary	Default	10.658	14.25	4.044	6	23
MAX_VI DIV1 neuron #24_640_1x1	N4	Default	Primary	Default	6.254	11.961	3.274	7	20
MAX_VI DIV1 neuron #24_640_1x1	N5	Default	Primary	Default	8.027	12.246	4.969	2	23
MAX_VI DIV1 neuron #24_640_1x1	N6	Default	Primary	Default	5.13	10.585	3.956	4	25
MAX_VI DIV1 neuron #24_640_1x1	N7	Default	Secondary	Default	8.629	15.212	3.952	8	24
640 Groups
Image	Cluster	Type	Count	Sum Len [micron]	Mean Len [micron]	SD Len [micron]	Min Len [micron]	Max Len [micron]	Mean Val [a.u.]	SD Val [a.u.]	Min Val [a.u.]	Max Val [a.u.]
MAX_VI DIV1 neuron #24_640_1x1	All	All	7	80.468	11.495	10.546	5.13	35.064	21.178	14.555	2	72
Image 19
VI DIV1 neuron #25_all
Electroporation efficency by measuring GFP efficency with "Minimum" ROI (only covering soma)
		Label	Area	Mean	Min	Max	BX	BY	Width	Height	IntDen	RawIntDen
488	1	C1-MAX_VI DIV1 neuron #25_all.nd2:VI DIV1 neuron #25_all_Minimum	57.262	160.459	122	255	5.6	2.267	41.867	53.067	9188.25	516839
640	2	C2-MAX_VI DIV1 neuron #25_all.nd2:VI DIV1 neuron #25_all_Minimum	57.262	103.595	1	249	5.6	2.267	41.867	53.067	5932.07	333679
405	3	C3-MAX_VI DIV1 neuron #25_all.nd2:VI DIV1 neuron #25_all_Minimum	57.262	72.851	3	173	5.6	2.267	41.867	53.067	4171.63	234654
640 Tracings
Image	Tracing	Cluster	Type	Label	Length [micron]	Mean Val [a.u.]	SD Val [a.u.]	Min Val [a.u.]	Max Val [a.u.]
MAX_VI DIV1 neuron #25_640_1x1	N1	Default	Primary	Default	35.581	46.643	18.454	14	85
MAX_VI DIV1 neuron #25_640_1x1	N2	Default	Primary	Default	10.115	24.697	10.618	5	48
MAX_VI DIV1 neuron #25_640_1x1	N3	Default	Primary	Default	15.793	64.376	20.507	20	101
640 Groups
Image	Cluster	Type	Count	Sum Len [micron]	Mean Len [micron]	SD Len [micron]	Min Len [micron]	Max Len [micron]	Mean Val [a.u.]	SD Val [a.u.]	Min Val [a.u.]	Max Val [a.u.]
MAX_VI DIV1 neuron #25_640_1x1	All	All	3	61.49	20.497	13.369	10.115	35.581	47.483	21.854	5	101
Image 20
VI DIV1 neuron #26_all
Electroporation efficency by measuring GFP efficency with "Minimum" ROI (only covering soma)
		Label	Area	Mean	Min	Max	BX	BY	Width	Height	IntDen	RawIntDen
488	1	C1-MAX_VI DIV1 neuron #26_all.nd2:VI DIV1 neuron #26_all_Minimum	72.107	116.117	81	255	0.267	17.2	59.2	30.4	8372.8	470970
640	2	C2-MAX_VI DIV1 neuron #26_all.nd2:VI DIV1 neuron #26_all_Minimum	72.107	19.619	1	51	0.267	17.2	59.2	30.4	1414.65	79574
405	3	C3-MAX_VI DIV1 neuron #26_all.nd2:VI DIV1 neuron #26_all_Minimum	72.107	69.437	3	255	0.267	17.2	59.2	30.4	5006.88	281637
640 Tracings
Image	Tracing	Cluster	Type	Label	Length [micron]	Mean Val [a.u.]	SD Val [a.u.]	Min Val [a.u.]	Max Val [a.u.]
MAX_VI DIV1 neuron #26_640_1x1	N1	Default	Primary	Default	32.792	7.421	2.896	2	18
MAX_VI DIV1 neuron #26_640_1x1	N2	Default	Primary	Default	28.446	9.039	2.676	4	18
MAX_VI DIV1 neuron #26_640_1x1	N3	Default	Secondary	Default	5.298	3.22	1.294	1	6
MAX_VI DIV1 neuron #26_640_1x1	N4	Default	Secondary	Default	17.94	2.883	2.43	0	10
MAX_VI DIV1 neuron #26_640_1x1	N5	Default	Secondary	Default	9.896	2.829	1.5	0	8
640 Groups
Image	Cluster	Type	Count	Sum Len [micron]	Mean Len [micron]	SD Len [micron]	Min Len [micron]	Max Len [micron]	Mean Val [a.u.]	SD Val [a.u.]	Min Val [a.u.]	Max Val [a.u.]
MAX_VI DIV1 neuron #26_640_1x1	All	All	5	94.372	18.874	11.738	5.298	32.792	6.357	3.634	0	18
Image 21
VI DIV1 neuron #27_all
Electroporation efficency by measuring GFP efficency with "Minimum" ROI (only covering soma)
		Label	Area	Mean	Min	Max	BX	BY	Width	Height	IntDen	RawIntDen
488	1	C1-MAX_VI DIV1 neuron #27_all.nd2:VI DIV1 neuron #27_all_Minimum	64.604	148.364	107	255	0	12.8	51.2	17.067	9584.98	539155
640	2	C2-MAX_VI DIV1 neuron #27_all.nd2:VI DIV1 neuron #27_all_Minimum	64.604	78.808	17	207	0	12.8	51.2	17.067	5091.34	286388
405	3	C3-MAX_VI DIV1 neuron #27_all.nd2:VI DIV1 neuron #27_all_Minimum	64.604	63.131	3	165	0	12.8	51.2	17.067	4078.52	229417
640 Tracings
Image	Tracing	Cluster	Type	Label	Length [micron]	Mean Val [a.u.]	SD Val [a.u.]	Min Val [a.u.]	Max Val [a.u.]
MAX_VI DIV1 neuron #27_640_1x1	N1	Default	Primary	Default	41.181	26.377	7.632	8	48
MAX_VI DIV1 neuron #27_640_1x1	N2	Default	Primary	Default	35.468	19.455	7.13	4	39
640 Groups
Image	Cluster	Type	Count	Sum Len [micron]	Mean Len [micron]	SD Len [micron]	Min Len [micron]	Max Len [micron]	Mean Val [a.u.]	SD Val [a.u.]	Min Val [a.u.]	Max Val [a.u.]
MAX_VI DIV1 neuron #27_640_1x1	All	All	2	76.649	38.325	4.04	35.468	41.181	23.223	8.165	4	48
Image 22
VI DIV1 neuron #28_all
Electroporation efficency by measuring GFP efficency with "Minimum" ROI (only covering soma)
		Label	Area	Mean	Min	Max	BX	BY	Width	Height	IntDen	RawIntDen
488	1	C1-MAX_VI DIV1 neuron #28_all.nd2:VI DIV1 neuron #28_all_Minimum	49.724	145.296	86	255	24.8	27.467	8.8	9.733	7224.76	406393
640	2	C2-MAX_VI DIV1 neuron #28_all.nd2:VI DIV1 neuron #28_all_Minimum	49.724	131.596	14	255	24.8	27.467	8.8	9.733	6543.54	368074
405	3	C3-MAX_VI DIV1 neuron #28_all.nd2:VI DIV1 neuron #28_all_Minimum	49.724	89.935	4	225	24.8	27.467	8.8	9.733	4471.96	251548
640 Tracings
Image	Tracing	Cluster	Type	Label	Length [micron]	Mean Val [a.u.]	SD Val [a.u.]	Min Val [a.u.]	Max Val [a.u.]
MAX_VI DIV1 neuron #28_640_1x1	N1	Default	Primary	Default	6.377	18.073	9.577	4	50
MAX_VI DIV1 neuron #28_640_1x1	N2	Default	Primary	Default	10.467	69.879	22.459	22	98
MAX_VI DIV1 neuron #28_640_1x1	N3	Default	Primary	Default	12.391	56.355	26.879	8	98
640 Groups
Image	Cluster	Type	Count	Sum Len [micron]	Mean Len [micron]	SD Len [micron]	Min Len [micron]	Max Len [micron]	Mean Val [a.u.]	SD Val [a.u.]	Min Val [a.u.]	Max Val [a.u.]
MAX_VI DIV1 neuron #28_640_1x1	All	All	3	29.234	9.745	3.071	6.377	12.391	52.656	29.677	4	98
Image 23
VI DIV1 neuron #29_all
Electroporation efficency by measuring GFP efficency with "Minimum" ROI (only covering soma)
		Label	Area	Mean	Min	Max	BX	BY	Width	Height	IntDen	RawIntDen
488	1	C1-MAX_VI DIV1 neuron #29_all.nd2:VI DIV1 neuron #29_all_Minimum	116.338	138.531	92	255	23.733	26.133	15.067	20.267	16116.4	906548
640	2	C2-MAX_VI DIV1 neuron #29_all.nd2:VI DIV1 neuron #29_all_Minimum	116.338	91.303	18	255	23.733	26.133	15.067	20.267	10622	597490
405	3	C3-MAX_VI DIV1 neuron #29_all.nd2:VI DIV1 neuron #29_all_Minimum	116.338	44.758	3	169	23.733	26.133	15.067	20.267	5207.04	292896
640 Tracings
Image	Tracing	Cluster	Type	Label	Length [micron]	Mean Val [a.u.]	SD Val [a.u.]	Min Val [a.u.]	Max Val [a.u.]
MAX_VI DIV1 neuron #29_640_1x1	N1	Default	Primary	Default	9.986	18.62	9.413	9	43
MAX_VI DIV1 neuron #29_640_1x1	N2	Default	Primary	Default	28.2	13.97	8.169	4	38
MAX_VI DIV1 neuron #29_640_1x1	N3	Default	Primary	Default	12.992	13.429	4.705	6	25
MAX_VI DIV1 neuron #29_640_1x1	N4	Default	Primary	Default	45.693	16.994	9.331	3	44
MAX_VI DIV1 neuron #29_640_1x1	N5	Default	Primary	Default	14.909	16.121	11.012	2	46
MAX_VI DIV1 neuron #29_640_1x1	N6	Default	Secondary	Default	21.429	9.354	3.208	4	18
640 Groups
Image	Cluster	Type	Count	Sum Len [micron]	Mean Len [micron]	SD Len [micron]	Min Len [micron]	Max Len [micron]	Mean Val [a.u.]	SD Val [a.u.]	Min Val [a.u.]	Max Val [a.u.]
MAX_VI DIV1 neuron #29_640_1x1	All	All	6	133.21	22.202	13.234	9.986	45.693	14.747	8.707	2	46
Image 24
VI DIV1 neuron #30_all
Electroporation efficency by measuring GFP efficency with "Minimum" ROI (only covering soma)
		Label	Area	Mean	Min	Max	BX	BY	Width	Height	IntDen	RawIntDen
488	1	C1-MAX_VI DIV1 neuron #30_all.nd2:VI DIV1 neuron #30_all_Minimum	86.898	3103.22	2208	5064	25.6	37.2	24.533	14.667	269663	15168535
640	2	C2-MAX_VI DIV1 neuron #30_all.nd2:VI DIV1 neuron #30_all_Minimum	86.898	4100.7	1027	11916	25.6	37.2	24.533	14.667	356342	20044222
405	3	C3-MAX_VI DIV1 neuron #30_all.nd2:VI DIV1 neuron #30_all_Minimum	86.898	5851.01	317	19738	25.6	37.2	24.533	14.667	508439	28599713
640 Tracings
Image	Tracing	Cluster	Type	Label	Length [micron]	Mean Val [a.u.]	SD Val [a.u.]	Min Val [a.u.]	Max Val [a.u.]
MAX_VI DIV1 neuron #30_640_1x1	N1	Default	Primary	Default	34.227	30.119	12.764	7	58
MAX_VI DIV1 neuron #30_640_1x1	N2	Default	Primary	Default	40.816	39.303	20.163	4	90
640 Groups
Image	Cluster	Type	Count	Sum Len [micron]	Mean Len [micron]	SD Len [micron]	Min Len [micron]	Max Len [micron]	Mean Val [a.u.]	SD Val [a.u.]	Min Val [a.u.]	Max Val [a.u.]
MAX_VI DIV1 neuron #30_640_1x1	All	All	2	75.043	37.522	4.659	34.227	40.816	35.028	17.71	4	90

## Sheet: V409A DIV1
V409 neuron prep_08.24.2020
* all .nd2 images were converted into an 8-bit grayscale .tiff in order to be analyzed in NeuronJ (imageJ plugin) *
Scale is set at 7.5µm/pixel
Image 1
VA DIV1 neuron #2_all
Electroporation efficency by measuring GFP efficency with "Minimum" ROI (only covering soma)
		Label	Area	Mean	Min	Max	BX	BY	Width	Height	IntDen	RawIntDen
488	1	C1-MAX_VA DIV1 neuron #2_all.nd2:VA DIV1 neuron #2_all_Minimum	72.16	124.493	89	255	0.533	6.933	60.4	56.267	8983.4	505316
640	2	C2-MAX_VA DIV1 neuron #2_all.nd2:VA DIV1 neuron #2_all_Minimum	72.16	74.53	2	236	0.533	6.933	60.4	56.267	5378.12	302519
405	3	C3-MAX_VA DIV1 neuron #2_all.nd2:VA DIV1 neuron #2_all_Minimum	72.16	64.054	5	172	0.533	6.933	60.4	56.267	4622.12	259994
640 Tracings
Image	Tracing	Cluster	Type	Label	Length [micron]	Mean Val [a.u.]	SD Val [a.u.]	Min Val [a.u.]	Max Val [a.u.]
MAX_VA DIV1 neuron #2_640_1x1	N1	Default	Primary	Default	23.263	12.727	6.981	3	34
MAX_VA DIV1 neuron #2_640_1x1	N2	Default	Primary	Default	88.878	51.868	16.008	13	102
MAX_VA DIV1 neuron #2_640_1x1	N3	Default	Primary	Default	14.183	60.321	22.896	5	98
640 Groups
Image	Cluster	Type	Count	Sum Len [micron]	Mean Len [micron]	SD Len [micron]	Min Len [micron]	Max Len [micron]	Mean Val [a.u.]	SD Val [a.u.]	Min Val [a.u.]	Max Val [a.u.]
MAX_VA DIV1 neuron #2_640_1x1	All	All	3	126.324	42.108	40.757	14.183	88.878	45.676	22.428	3	102
Image 2
VA DIV1 neuron #3_all
Electroporation efficency by measuring GFP efficency with "Minimum" ROI (only covering soma)
		Label	Area	Mean	Min	Max	BX	BY	Width	Height	IntDen	RawIntDen
488	1	C1-MAX_VA DIV1 neuron #3_all.nd2:VA DIV1 neuron #3_all_Minimum	81.244	105.93	71	255	35.733	28.267	11.867	19.333	8606.2	484099
640	2	C2-MAX_VA DIV1 neuron #3_all.nd2:VA DIV1 neuron #3_all_Minimum	81.244	98.501	10	255	35.733	28.267	11.867	19.333	8002.67	450150
405	3	C3-MAX_VA DIV1 neuron #3_all.nd2:VA DIV1 neuron #3_all_Minimum	81.244	35.584	5	114	35.733	28.267	11.867	19.333	2890.97	162617
640 Tracings
Image	Tracing	Cluster	Type	Label	Length [micron]	Mean Val [a.u.]	SD Val [a.u.]	Min Val [a.u.]	Max Val [a.u.]
MAX_VA DIV1 neuron #3_640_1x1	N1	Default	Primary	Default	14.528	13.747	5.79	3	28
MAX_VA DIV1 neuron #3_640_1x1	N2	Default	Primary	Default	15.472	15.078	5.739	5	30
640 Groups
Image	Cluster	Type	Count	Sum Len [micron]	Mean Len [micron]	SD Len [micron]	Min Len [micron]	Max Len [micron]	Mean Val [a.u.]	SD Val [a.u.]	Min Val [a.u.]	Max Val [a.u.]
MAX_VA DIV1 neuron #3_640_1x1	All	All	2	30	15	0.668	14.528	15.472	14.493	5.786	3	30
Image 3
VA DIV1 neuron #4_all
Electroporation efficency by measuring GFP efficency with "Minimum" ROI (only covering soma)
		Label	Area	Mean	Min	Max	BX	BY	Width	Height	IntDen	RawIntDen
488	1	C1-MAX_VA DIV1 neuron #4_all.nd2:VA DIV1 neuron #4_all_Minimum	67.396	136.252	85	255	25.867	31.733	21.2	12	9182.76	516530
640	2	C2-MAX_VA DIV1 neuron #4_all.nd2:VA DIV1 neuron #4_all_Minimum	67.396	69.036	3	212	25.867	31.733	21.2	12	4652.71	261715
405	3	C3-MAX_VA DIV1 neuron #4_all.nd2:VA DIV1 neuron #4_all_Minimum	67.396	64.414	4	255	25.867	31.733	21.2	12	4341.19	244192
640 Tracings
Image	Tracing	Cluster	Type	Label	Length [micron]	Mean Val [a.u.]	SD Val [a.u.]	Min Val [a.u.]	Max Val [a.u.]
MAX_VA DIV1 neuron #4_640_1x1	N1	Default	Primary	Default	25.885	20.856	14.989	1	56
MAX_VA DIV1 neuron #4_640_1x1	N2	Default	Primary	Default	23.352	19.135	5.105	8	38
640 Groups
Image	Cluster	Type	Count	Sum Len [micron]	Mean Len [micron]	SD Len [micron]	Min Len [micron]	Max Len [micron]	Mean Val [a.u.]	SD Val [a.u.]	Min Val [a.u.]	Max Val [a.u.]
MAX_VA DIV1 neuron #4_640_1x1	All	All	2	49.237	24.619	1.791	23.352	25.885	20.059	11.538	1	56
Image 4
VA DIV1 neuron #5_all
Electroporation efficency by measuring GFP efficency with "Minimum" ROI (only covering soma)
		Label	Area	Mean	Min	Max	BX	BY	Width	Height	IntDen	RawIntDen
488	1	C1-MAX_VA DIV1 neuron #5_all.nd2:VA DIV1 neuron #5_all_Minimum	55.947	117.842	77	255	22.267	19.067	30.267	23.067	6592.87	370849
640	2	C2-MAX_VA DIV1 neuron #5_all.nd2:VA DIV1 neuron #5_all_Minimum	55.947	85.84	10	255	22.267	19.067	30.267	23.067	4802.45	270138
405	3	C3-MAX_VA DIV1 neuron #5_all.nd2:VA DIV1 neuron #5_all_Minimum	55.947	53.738	7	133	22.267	19.067	30.267	23.067	3006.47	169114
640 Tracings
Image	Tracing	Cluster	Type	Label	Length [micron]	Mean Val [a.u.]	SD Val [a.u.]	Min Val [a.u.]	Max Val [a.u.]
MAX_VA DIV1 neuron #5_640_1x1	N1	Default	Primary	Default	13.442	16.614	7.29	6	38
MAX_VA DIV1 neuron #5_640_1x1	N2	Default	Primary	Default	12.584	17.581	6.487	7	31
MAX_VA DIV1 neuron #5_640_1x1	N3	Default	Primary	Default	11.159	22.368	9.003	6	46
640 Groups
Image	Cluster	Type	Count	Sum Len [micron]	Mean Len [micron]	SD Len [micron]	Min Len [micron]	Max Len [micron]	Mean Val [a.u.]	SD Val [a.u.]	Min Val [a.u.]	Max Val [a.u.]
MAX_VA DIV1 neuron #5_640_1x1	All	All	3	37.185	12.395	1.153	11.159	13.442	18.593	7.945	6	46
Image 5
VA DIV1 neuron #7_all
Electroporation efficency by measuring GFP efficency with "Minimum" ROI (only covering soma)
		Label	Area	Mean	Min	Max	BX	BY	Width	Height	IntDen	RawIntDen
488	1	C1-MAX_VA DIV1 neuron #7_all.nd2:VA DIV1 neuron #7_all_Minimum	55.876	138.157	95	255	13.867	19.067	46.8	30.533	7719.57	434226
640	2	C2-MAX_VA DIV1 neuron #7_all.nd2:VA DIV1 neuron #7_all_Minimum	55.876	50.025	11	151	13.867	19.067	46.8	30.533	2795.2	157230
405	3	C3-MAX_VA DIV1 neuron #7_all.nd2:VA DIV1 neuron #7_all_Minimum	55.876	58.067	3	131	13.867	19.067	46.8	30.533	3244.52	182504
640 Tracings
Image	Tracing	Cluster	Type	Label	Length [micron]	Mean Val [a.u.]	SD Val [a.u.]	Min Val [a.u.]	Max Val [a.u.]
MAX_VA DIV1 neuron #7_640_2x1	N1	Default	Primary	Default	46.506	34.649	11.126	13	66
MAX_VA DIV1 neuron #7_640_2x1	N2	Default	Primary	Default	27.846	19.939	11.745	2	40
640 Groups
Image	Cluster	Type	Count	Sum Len [micron]	Mean Len [micron]	SD Len [micron]	Min Len [micron]	Max Len [micron]	Mean Val [a.u.]	SD Val [a.u.]	Min Val [a.u.]	Max Val [a.u.]
MAX_VA DIV1 neuron #7_640_2x1	All	All	2	74.353	37.176	13.195	27.846	46.506	28.729	13.467	2	66
Image 6
VA DIV1 neuron #10_all
Electroporation efficency by measuring GFP efficency with "Minimum" ROI (only covering soma)
		Label	Area	Mean	Min	Max	BX	BY	Width	Height	IntDen	RawIntDen
488	1	C1-MAX_VA DIV1 neuron #10_all.nd2:VA DIV1 neuron #10_all_Minimum	74.578	148.542	99	255	22.4	19.333	29.733	25.867	11077.9	623133
640	2	C2-MAX_VA DIV1 neuron #10_all.nd2:VA DIV1 neuron #10_all_Minimum	74.578	86.016	23	255	22.4	19.333	29.733	25.867	6414.92	360839
405	3	C3-MAX_VA DIV1 neuron #10_all.nd2:VA DIV1 neuron #10_all_Minimum	74.578	55.93	2	171	22.4	19.333	29.733	25.867	4171.11	234625
640 Tracings
Image	Tracing	Cluster	Type	Label	Length [micron]	Mean Val [a.u.]	SD Val [a.u.]	Min Val [a.u.]	Max Val [a.u.]
MAX_VA DIV1 neuron #10_640_1x1	N1	Default	Primary	Default	21.593	23.364	11.741	4	48
MAX_VA DIV1 neuron #10_640_1x1	N2	Default	Primary	Default	15.834	22.331	8.283	4	40
MAX_VA DIV1 neuron #10_640_1x1	N3	Default	Primary	Default	11.481	21.648	4.983	7	32
MAX_VA DIV1 neuron #10_640_1x1	N4	Default	Primary	Default	9.613	13.803	6.899	2	37
MAX_VA DIV1 neuron #10_640_1x1	N5	Default	Primary	Default	25.862	19.578	10.393	4	46
MAX_VA DIV1 neuron #10_640_1x1	N6	Default	Primary	Default	13.204	17.033	8.949	5	40
MAX_VA DIV1 neuron #10_640_1x1	N7	Default	Primary	Default	5.224	10.361	6.076	2	20
640 Groups
Image	Cluster	Type	Count	Sum Len [micron]	Mean Len [micron]	SD Len [micron]	Min Len [micron]	Max Len [micron]	Mean Val [a.u.]	SD Val [a.u.]	Min Val [a.u.]	Max Val [a.u.]
MAX_VA DIV1 neuron #10_640_1x1	All	All	7	102.812	14.687	7.091	5.224	25.862	19.773	9.947	2	48
Image 7
VA DIV1 neuron #12_all
Electroporation efficency by measuring GFP efficency with "Minimum" ROI (only covering soma)
		Label	Area	Mean	Min	Max	BX	BY	Width	Height	IntDen	RawIntDen
488	1	C1-MAX_VA DIV1 neuron #12_all.nd2:VA DIV1 neuron #12_all_Minimum	70.809	164.566	109	255	27.333	24.533	14.267	9.067	11652.8	655468
640	2	C2-MAX_VA DIV1 neuron #12_all.nd2:VA DIV1 neuron #12_all_Minimum	70.809	83.243	19	255	27.333	24.533	14.267	9.067	5894.33	331556
405	3	C3-MAX_VA DIV1 neuron #12_all.nd2:VA DIV1 neuron #12_all_Minimum	70.809	52.17	3	119	27.333	24.533	14.267	9.067	3694.12	207794
640 Tracings
Image	Tracing	Cluster	Type	Label	Length [micron]	Mean Val [a.u.]	SD Val [a.u.]	Min Val [a.u.]	Max Val [a.u.]
MAX_VA DIV1 neuron #12_640_1x1	N1	Default	Primary	Default	10.437	6.07	2.9	1	13
MAX_VA DIV1 neuron #12_640_1x1	N2	Default	Primary	Default	8.37	14.561	6.886	4	27
MAX_VA DIV1 neuron #12_640_1x1	N3	Default	Primary	Default	28.618	22.951	13.485	2	59
MAX_VA DIV1 neuron #12_640_1x1	N4	Default	Primary	Default	21.004	7.36	4.743	1	23
MAX_VA DIV1 neuron #12_640_1x1	N5	Default	Primary	Default	25.616	5.175	3.18	1	14
MAX_VA DIV1 neuron #12_640_1x1	N6	Default	Primary	Default	13.985	5.703	6.188	2	62
640 Groups
Image	Cluster	Type	Count	Sum Len [micron]	Mean Len [micron]	SD Len [micron]	Min Len [micron]	Max Len [micron]	Mean Val [a.u.]	SD Val [a.u.]	Min Val [a.u.]	Max Val [a.u.]
MAX_VA DIV1 neuron #12_640_1x1	All	All	6	108.03	18.005	8.317	8.37	28.618	11.427	11.065	1	62
Image 8
VA DIV1 neuron #13_all
Electroporation efficency by measuring GFP efficency with "Minimum" ROI (only covering soma)
		Label	Area	Mean	Min	Max	BX	BY	Width	Height	IntDen	RawIntDen
488	1	C1-MAX_VA DIV1 neuron #13_all.nd2:VA DIV1 neuron #13_all_Moments	69.849	39.584	30	255	6.133	2.933	58.8	61.467	2764.91	155526
640	2	C2-MAX_VA DIV1 neuron #13_all.nd2:VA DIV1 neuron #13_all_Moments	69.849	77.178	5	215	6.133	2.933	58.8	61.467	5390.77	303231
405	3	C3-MAX_VA DIV1 neuron #13_all.nd2:VA DIV1 neuron #13_all_Moments	69.849	36.899	3	155	6.133	2.933	58.8	61.467	2577.35	144976
640 Tracings
Image	Tracing	Cluster	Type	Label	Length [micron]	Mean Val [a.u.]	SD Val [a.u.]	Min Val [a.u.]	Max Val [a.u.]
MAX_VA DIV1 neuron #13_640_1x1	N1	Default	Primary	Default	26.117	25.945	12.428	4	58
MAX_VA DIV1 neuron #13_640_1x1	N2	Default	Primary	Default	59.029	41.901	15.95	10	102
MAX_VA DIV1 neuron #13_640_1x1	N3	Default	Primary	Default	9.403	15.818	11.865	3	40
MAX_VA DIV1 neuron #13_640_1x1	N4	Default	Secondary	Default	5.166	15.537	5.441	6	24
640 Groups
Image	Cluster	Type	Count	Sum Len [micron]	Mean Len [micron]	SD Len [micron]	Min Len [micron]	Max Len [micron]	Mean Val [a.u.]	SD Val [a.u.]	Min Val [a.u.]	Max Val [a.u.]
MAX_VA DIV1 neuron #13_640_1x1	All	All	4	99.715	24.929	24.466	5.166	59.029	33.818	17.578	3	102
Image 9
VA DIV1 neuron #14_all
Electroporation efficency by measuring GFP efficency with "Minimum" ROI (only covering soma)
		Label	Area	Mean	Min	Max	BX	BY	Width	Height	IntDen	RawIntDen
488	1	C1-MAX_VA DIV1 neuron #14_all.nd2:VA DIV1 neuron #14_all_Minimum	84.267	141.021	94	255	27.6	22.4	17.333	13.6	11883.4	668439
640	2	C2-MAX_VA DIV1 neuron #14_all.nd2:VA DIV1 neuron #14_all_Minimum	84.267	72.258	4	255	27.6	22.4	17.333	13.6	6088.91	342501
405	3	C3-MAX_VA DIV1 neuron #14_all.nd2:VA DIV1 neuron #14_all_Minimum	84.267	34.698	3	116	27.6	22.4	17.333	13.6	2923.88	164468
640 Tracings
Image	Tracing	Cluster	Type	Label	Length [micron]	Mean Val [a.u.]	SD Val [a.u.]	Min Val [a.u.]	Max Val [a.u.]
MAX_VA DIV1 neuron #14_640_1x1	N1	Default	Primary	Default	12.304	16.021	7.742	3	31
MAX_VA DIV1 neuron #14_640_1x1	N2	Default	Primary	Default	16.662	19.769	7.786	7	37
MAX_VA DIV1 neuron #14_640_1x1	N3	Default	Primary	Default	13.52	13.772	5.741	2	27
MAX_VA DIV1 neuron #14_640_1x1	N4	Default	Primary	Default	14.258	11.505	5.541	3	23
640 Groups
Image	Cluster	Type	Count	Sum Len [micron]	Mean Len [micron]	SD Len [micron]	Min Len [micron]	Max Len [micron]	Mean Val [a.u.]	SD Val [a.u.]	Min Val [a.u.]	Max Val [a.u.]
MAX_VA DIV1 neuron #14_640_1x1	All	All	4	56.743	14.186	1.837	12.304	16.662	15.57	7.51	2	37
Image 10
VA DIV1 neuron #15_all
Electroporation efficency by measuring GFP efficency with "Minimum" ROI (only covering soma)
		Label	Area	Mean	Min	Max	BX	BY	Width	Height	IntDen	RawIntDen
488	1	C1-MAX_VA DIV1 neuron #15_all.nd2:VA DIV1 neuron #15_all_Minimum	96.107	124.184	82	255	5.333	6.8	61.867	60.667	11934.9	671338
640	2	C2-MAX_VA DIV1 neuron #15_all.nd2:VA DIV1 neuron #15_all_Minimum	96.107	58.596	2	175	5.333	6.8	61.867	60.667	5631.43	316768
405	3	C3-MAX_VA DIV1 neuron #15_all.nd2:VA DIV1 neuron #15_all_Minimum	96.107	67.285	2	202	5.333	6.8	61.867	60.667	6466.51	363741
640 Tracings
Image	Tracing	Cluster	Type	Label	Length [micron]	Mean Val [a.u.]	SD Val [a.u.]	Min Val [a.u.]	Max Val [a.u.]
MAX_VA DIV1 neuron #15_640_1x1	N1	Default	Primary	Default	10.087	13.737	3.937	6	23
MAX_VA DIV1 neuron #15_640_1x1	N2	Default	Primary	Default	6.908	11.118	4.246	2	26
MAX_VA DIV1 neuron #15_640_1x1	N3	Default	Primary	Default	9.835	15.182	4.21	6	24
MAX_VA DIV1 neuron #15_640_1x1	N4	Default	Primary	Default	6.22	8.565	3.793	2	16
MAX_VA DIV1 neuron #15_640_1x1	N5	Default	Primary	Default	6.793	13.5	5.612	5	28
MAX_VA DIV1 neuron #15_640_1x1	N6	Default	Secondary	Default	3.256	13.308	5.655	8	30
640 Groups
Image	Cluster	Type	Count	Sum Len [micron]	Mean Len [micron]	SD Len [micron]	Min Len [micron]	Max Len [micron]	Mean Val [a.u.]	SD Val [a.u.]	Min Val [a.u.]	Max Val [a.u.]
MAX_VA DIV1 neuron #15_640_1x1	All	All	6	43.099	7.183	2.531	3.256	10.087	12.778	4.925	2	30
Image 11
VA DIV1 neuron #16_all
Electroporation efficency by measuring GFP efficency with "Minimum" ROI (only covering soma)
		Label	Area	Mean	Min	Max	BX	BY	Width	Height	IntDen	RawIntDen
488	1	C1-MAX_VA DIV1 neuron #16_all.nd2:VA DIV1 neuron #16_all_Minimum	55.68	114.8	66	255	28.133	20.933	14.267	18	6392.09	359555
640	2	C2-MAX_VA DIV1 neuron #16_all.nd2:VA DIV1 neuron #16_all_Minimum	55.68	39.399	2	112	28.133	20.933	14.267	18	2193.76	123399
405	3	C3-MAX_VA DIV1 neuron #16_all.nd2:VA DIV1 neuron #16_all_Minimum	55.68	93.636	3	255	28.133	20.933	14.267	18	5213.67	293269
640 Tracings
Image	Tracing	Cluster	Type	Label	Length [micron]	Mean Val [a.u.]	SD Val [a.u.]	Min Val [a.u.]	Max Val [a.u.]
MAX_VA DIV1 neuron #16_640_1x1	N1	Default	Primary	Default	7.04	7.446	2.898	3	15
MAX_VA DIV1 neuron #16_640_1x1	N2	Default	Primary	Default	16.048	10.832	4.663	3	21
MAX_VA DIV1 neuron #16_640_1x1	N3	Default	Primary	Default	4.893	7.25	3.341	2	17
640 Groups
Image	Cluster	Type	Count	Sum Len [micron]	Mean Len [micron]	SD Len [micron]	Min Len [micron]	Max Len [micron]	Mean Val [a.u.]	SD Val [a.u.]	Min Val [a.u.]	Max Val [a.u.]
MAX_VA DIV1 neuron #16_640_1x1	All	All	3	27.981	9.327	5.919	4.893	16.048	9.181	4.333	2	21
Image 12
VA DIV1 neuron #17_all
Electroporation efficency by measuring GFP efficency with "Minimum" ROI (only covering soma)
		Label	Area	Mean	Min	Max	BX	BY	Width	Height	IntDen	RawIntDen
488	1	C1-MAX_VA DIV1 neuron #17_all.nd2:VA DIV1 neuron #17_all_Minimum	64.64	143.21	83	255	44.933	38.267	11.6	8.8	9257.12	520713
640	2	C2-MAX_VA DIV1 neuron #17_all.nd2:VA DIV1 neuron #17_all_Minimum	64.64	94.24	18	255	44.933	38.267	11.6	8.8	6091.66	342656
405	3	C3-MAX_VA DIV1 neuron #17_all.nd2:VA DIV1 neuron #17_all_Minimum	64.64	98.713	5	216	44.933	38.267	11.6	8.8	6380.84	358922
640 Tracings
Image	Tracing	Cluster	Type	Label	Length [micron]	Mean Val [a.u.]	SD Val [a.u.]	Min Val [a.u.]	Max Val [a.u.]
MAX_VA DIV1 neuron #17_640_1x1	N1	Default	Primary	Default	8.797	25.576	8.482	8	48
MAX_VA DIV1 neuron #17_640_1x1	N2	Default	Primary	Default	7.455	28.435	10.419	7	49
MAX_VA DIV1 neuron #17_640_1x1	N3	Default	Primary	Default	13.575	26.733	15.013	4	57
640 Groups
Image	Cluster	Type	Count	Sum Len [micron]	Mean Len [micron]	SD Len [micron]	Min Len [micron]	Max Len [micron]	Mean Val [a.u.]	SD Val [a.u.]	Min Val [a.u.]	Max Val [a.u.]
MAX_VA DIV1 neuron #17_640_1x1	All	All	3	29.827	9.942	3.217	7.455	13.575	26.742	12.121	4	57
Image 13
VA DIV1 neuron #19_all
Electroporation efficency by measuring GFP efficency with "Minimum" ROI (only covering soma)
		Label	Area	Mean	Min	Max	BX	BY	Width	Height	IntDen	RawIntDen
488	1	C1-MAX_VA DIV1 neuron #19_all.nd2:VA DIV1 neuron #19_all_Minimum	57.227	141.61	82	255	18.133	18.533	24.4	23.333	8103.89	455844
640	2	C2-MAX_VA DIV1 neuron #19_all.nd2:VA DIV1 neuron #19_all_Minimum	57.227	63.266	13	174	18.133	18.533	24.4	23.333	3620.5	203653
405	3	C3-MAX_VA DIV1 neuron #19_all.nd2:VA DIV1 neuron #19_all_Minimum	57.227	99.089	3	237	18.133	18.533	24.4	23.333	5670.52	318967
640 Tracings
Image	Tracing	Cluster	Type	Label	Length [micron]	Mean Val [a.u.]	SD Val [a.u.]	Min Val [a.u.]	Max Val [a.u.]
MAX_VA DIV1 neuron #19_640_1x1	N1	Default	Primary	Default	12.252	11.058	6.718	1	24
MAX_VA DIV1 neuron #19_640_1x1	N2	Default	Primary	Default	10.415	18.667	6.056	7	34
MAX_VA DIV1 neuron #19_640_1x1	N3	Default	Primary	Default	10.693	22.459	9.387	3	37
MAX_VA DIV1 neuron #19_640_1x1	N4	Default	Primary	Default	12.116	20.099	7.251	4	31
MAX_VA DIV1 neuron #19_640_1x1	N5	Default	Primary	Default	26.681	28.677	11.921	4	52
640 Groups
Image	Cluster	Type	Count	Sum Len [micron]	Mean Len [micron]	SD Len [micron]	Min Len [micron]	Max Len [micron]	Mean Val [a.u.]	SD Val [a.u.]	Min Val [a.u.]	Max Val [a.u.]
MAX_VA DIV1 neuron #19_640_1x1	All	All	5	72.157	14.431	6.897	10.415	26.681	21.415	11.011	1	52
Image 14
VA DIV1 neuron #20_all
Electroporation efficency by measuring GFP efficency with "Minimum" ROI (only covering soma)
		Label	Area	Mean	Min	Max	BX	BY	Width	Height	IntDen	RawIntDen
488	1	C1-MAX_VA DIV1 neuron #20_all.nd2:VA DIV1 neuron #20_all_Minimum	65.298	139.032	79	255	16.4	29.2	39.467	9.067	9078.51	510666
640	2	C2-MAX_VA DIV1 neuron #20_all.nd2:VA DIV1 neuron #20_all_Minimum	65.298	92.836	14	254	16.4	29.2	39.467	9.067	6061.96	340985
405	3	C3-MAX_VA DIV1 neuron #20_all.nd2:VA DIV1 neuron #20_all_Minimum	65.298	64.54	2	154	16.4	29.2	39.467	9.067	4214.29	237054
640 Tracings
Image	Tracing	Cluster	Type	Label	Length [micron]	Mean Val [a.u.]	SD Val [a.u.]	Min Val [a.u.]	Max Val [a.u.]
MAX_VA DIV1 neuron #20_640_1x1	N1	Default	Primary	Default	5.613	11.696	6.317	2	22
MAX_VA DIV1 neuron #20_640_1x1	N2	Default	Primary	Default	45.307	38.013	9.506	12	64
MAX_VA DIV1 neuron #20_640_1x1	N3	Default	Primary	Default	17.388	17.871	10.176	3	40
MAX_VA DIV1 neuron #20_640_1x1	N4	Default	Primary	Default	9.241	15.311	9.65	2	32
640 Groups
Image	Cluster	Type	Count	Sum Len [micron]	Mean Len [micron]	SD Len [micron]	Min Len [micron]	Max Len [micron]	Mean Val [a.u.]	SD Val [a.u.]	Min Val [a.u.]	Max Val [a.u.]
MAX_VA DIV1 neuron #20_640_1x1	All	All	4	77.55	19.388	17.968	5.613	45.307	28.601	14.525	2	64
Image 15
VA DIV1 neuron #21_all
Electroporation efficency by measuring GFP efficency with "Minimum" ROI (only covering soma)
		Label	Area	Mean	Min	Max	BX	BY	Width	Height	IntDen	RawIntDen
488	1	C1-MAX_VA DIV1 neuron #21_all.nd2:VA DIV1 neuron #21_all_Minimum	46.756	110.54	65	255	33.2	30.933	8.133	8.4	5168.34	290719
640	2	C2-MAX_VA DIV1 neuron #21_all.nd2:VA DIV1 neuron #21_all_Minimum	46.756	59.458	15	160	33.2	30.933	8.133	8.4	2780	156375
405	3	C3-MAX_VA DIV1 neuron #21_all.nd2:VA DIV1 neuron #21_all_Minimum	46.756	122.403	4	255	33.2	30.933	8.133	8.4	5723	321919
640 Tracings
Image	Tracing	Cluster	Type	Label	Length [micron]	Mean Val [a.u.]	SD Val [a.u.]	Min Val [a.u.]	Max Val [a.u.]
MAX_VA DIV1 neuron #21_640_1x1	N1	Default	Primary	Default	10.027	12.136	7.483	4	31
MAX_VA DIV1 neuron #21_640_1x1	N2	Default	Primary	Default	19.773	23.581	7.315	9	41
MAX_VA DIV1 neuron #21_640_1x1	N3	Default	Primary	Default	56.24	13.714	6.394	1	31
640 Groups
Image	Cluster	Type	Count	Sum Len [micron]	Mean Len [micron]	SD Len [micron]	Min Len [micron]	Max Len [micron]	Mean Val [a.u.]	SD Val [a.u.]	Min Val [a.u.]	Max Val [a.u.]
MAX_VA DIV1 neuron #21_640_1x1	All	All	3	86.04	28.68	24.36	10.027	56.24	15.837	7.992	1	41
Image 16
VA DIV1 neuron #22_all
Electroporation efficency by measuring GFP efficency with "Minimum" ROI (only covering soma)
		Label	Area	Mean	Min	Max	BX	BY	Width	Height	IntDen	RawIntDen
488	1	C1-MAX_VA DIV1 neuron #22_all.nd2:VA DIV1 neuron #22_all_Minimum	48.782	133.908	78	255	12.533	31.467	30.4	7.733	6532.34	367444
640	2	C2-MAX_VA DIV1 neuron #22_all.nd2:VA DIV1 neuron #22_all_Minimum	48.782	90.831	21	255	12.533	31.467	30.4	7.733	4430.92	249239
405	3	C3-MAX_VA DIV1 neuron #22_all.nd2:VA DIV1 neuron #22_all_Minimum	48.782	113.14	4	255	12.533	31.467	30.4	7.733	5519.2	310455
640 Tracings
Image	Tracing	Cluster	Type	Label	Length [micron]	Mean Val [a.u.]	SD Val [a.u.]	Min Val [a.u.]	Max Val [a.u.]
MAX_VA DIV1 neuron #22_640_1x1	N1	Default	Primary	Default	7.14	12.964	6.275	2	23
MAX_VA DIV1 neuron #22_640_1x1	N2	Default	Primary	Default	34.964	31.945	15.921	3	66
MAX_VA DIV1 neuron #22_640_1x1	N3	Default	Primary	Default	7.548	10.375	5.565	2	22
640 Groups
Image	Cluster	Type	Count	Sum Len [micron]	Mean Len [micron]	SD Len [micron]	Min Len [micron]	Max Len [micron]	Mean Val [a.u.]	SD Val [a.u.]	Min Val [a.u.]	Max Val [a.u.]
MAX_VA DIV1 neuron #22_640_1x1	All	All	3	49.652	16.551	15.948	7.14	34.964	25.42	16.533	2	66
Image 17
VA DIV1 neuron #24_all
Electroporation efficency by measuring GFP efficency with "Minimum" ROI (only covering soma)
		Label	Area	Mean	Min	Max	BX	BY	Width	Height	IntDen	RawIntDen
488	1	C1-MAX_VA DIV1 neuron #24_all.nd2:VA DIV1 neuron #24_all_Minimum	65.813	175.563	130	255	44.667	21.6	10.533	14.8	11554.4	649935
640	2	C2-MAX_VA DIV1 neuron #24_all.nd2:VA DIV1 neuron #24_all_Minimum	65.813	98.938	20	232	44.667	21.6	10.533	14.8	6511.43	366268
405	3	C3-MAX_VA DIV1 neuron #24_all.nd2:VA DIV1 neuron #24_all_Minimum	65.813	31.332	2	75	44.667	21.6	10.533	14.8	2062.04	115990
640 Tracings
Image	Tracing	Cluster	Type	Label	Length [micron]	Mean Val [a.u.]	SD Val [a.u.]	Min Val [a.u.]	Max Val [a.u.]
MAX_VA DIV1 neuron #24_640_1x2	N1	Default	Primary	Default	52.674	47.434	24.972	9	95
MAX_VA DIV1 neuron #24_640_1x2	N2	Default	Primary	Default	45.778	30.882	23.791	4	92
MAX_VA DIV1 neuron #24_640_1x2	N3	Default	Primary	Default	17.077	32.087	8.721	8	54
MAX_VA DIV1 neuron #24_640_1x2	N4	Default	Primary	Default	10.14	17.662	8.978	4	46
MAX_VA DIV1 neuron #24_640_1x2	N5	Default	Primary	Default	15.745	31.315	14.263	4	60
MAX_VA DIV1 neuron #24_640_1x2	N6	Default	Secondary	Default	4.187	13.548	9.201	4	52
MAX_VA DIV1 neuron #24_640_1x2	N7	Default	Secondary	Default	9.68	12.41	3.024	5	18
640 Groups
Image	Cluster	Type	Count	Sum Len [micron]	Mean Len [micron]	SD Len [micron]	Min Len [micron]	Max Len [micron]	Mean Val [a.u.]	SD Val [a.u.]	Min Val [a.u.]	Max Val [a.u.]
MAX_VA DIV1 neuron #24_640_1x2	All	All	7	155.281	22.183	19.058	4.187	52.674	34.245	23.112	4	95
Image 18
VA DIV1 neuron #25_all
Electroporation efficency by measuring GFP efficency with "Minimum" ROI (only covering soma)
		Label	Area	Mean	Min	Max	BX	BY	Width	Height	IntDen	RawIntDen
488	1	C1-MAX_VA DIV1 neuron #25_all.nd2:VA DIV1 neuron #25_all_Minimum	74.933	131.957	82	255	6.667	26.8	49.733	13.6	9887.95	556197
640	2	C2-MAX_VA DIV1 neuron #25_all.nd2:VA DIV1 neuron #25_all_Minimum	74.933	95.571	17	255	6.667	26.8	49.733	13.6	7161.42	402830
405	3	C3-MAX_VA DIV1 neuron #25_all.nd2:VA DIV1 neuron #25_all_Minimum	74.933	45.44	3	126	6.667	26.8	49.733	13.6	3404.98	191530
640 Tracings
Image	Tracing	Cluster	Type	Label	Length [micron]	Mean Val [a.u.]	SD Val [a.u.]	Min Val [a.u.]	Max Val [a.u.]
MAX_VA DIV1 neuron #25_640_1x1	N1	Default	Primary	Default	11.009	13.447	6.96	3	24
MAX_VA DIV1 neuron #25_640_1x1	N2	Default	Primary	Default	14.697	8.419	6.449	1	31
MAX_VA DIV1 neuron #25_640_1x1	N3	Default	Primary	Default	15.386	18.387	7.018	5	34
640 Groups
Image	Cluster	Type	Count	Sum Len [micron]	Mean Len [micron]	SD Len [micron]	Min Len [micron]	Max Len [micron]	Mean Val [a.u.]	SD Val [a.u.]	Min Val [a.u.]	Max Val [a.u.]
MAX_VA DIV1 neuron #25_640_1x1	All	All	3	41.092	13.697	2.353	11.009	15.386	13.787	7.996	1	34
Image 19
VA DIV1 neuron #27_all
Electroporation efficency by measuring GFP efficency with "Minimum" ROI (only covering soma)
		Label	Area	Mean	Min	Max	BX	BY	Width	Height	IntDen	RawIntDen
488	1	C1-MAX_VA DIV1 neuron #27_all.nd2:VA DIV1 neuron #27_all_Minimum	71.431	151.805	97	255	34.667	26.533	8.667	12	10843.6	609953
640	2	C2-MAX_VA DIV1 neuron #27_all.nd2:VA DIV1 neuron #27_all_Minimum	71.431	107.771	21	255	34.667	26.533	8.667	12	7698.19	433023
405	3	C3-MAX_VA DIV1 neuron #27_all.nd2:VA DIV1 neuron #27_all_Minimum	71.431	50.926	2	126	34.667	26.533	8.667	12	3637.71	204621
640 Tracings
Image	Tracing	Cluster	Type	Label	Length [micron]	Mean Val [a.u.]	SD Val [a.u.]	Min Val [a.u.]	Max Val [a.u.]
MAX_VA DIV1 neuron #27_640_1x1	N1	Default	Primary	Default	7.369	20.732	8.905	10	37
MAX_VA DIV1 neuron #27_640_1x1	N2	Default	Primary	Default	3.918	16.581	8.003	5	36
MAX_VA DIV1 neuron #27_640_1x1	N3	Default	Primary	Default	5.527	20.683	15.567	2	52
MAX_VA DIV1 neuron #27_640_1x1	N4	Default	Primary	Default	5.767	35.056	14.58	6	57
640 Groups
Image	Cluster	Type	Count	Sum Len [micron]	Mean Len [micron]	SD Len [micron]	Min Len [micron]	Max Len [micron]	Mean Val [a.u.]	SD Val [a.u.]	Min Val [a.u.]	Max Val [a.u.]
MAX_VA DIV1 neuron #27_640_1x1	All	All	4	22.58	5.645	1.412	3.918	7.369	23.079	13.664	2	57
Image 20
VA DIV1 neuron #29_all
Electroporation efficency by measuring GFP efficency with "Minimum" ROI (only covering soma)
		Label	Area	Mean	Min	Max	BX	BY	Width	Height	IntDen	RawIntDen
488	1	C1-MAX_VA DIV1 neuron #29_all.nd2:VA DIV1 neuron #29_all_Minimum	148.071	97.294	60	255	0	0	66.533	59.067	14406.4	810360
640	2	C2-MAX_VA DIV1 neuron #29_all.nd2:VA DIV1 neuron #29_all_Minimum	148.071	32.519	1	125	0	0	66.533	59.067	4815.11	270850
405	3	C3-MAX_VA DIV1 neuron #29_all.nd2:VA DIV1 neuron #29_all_Minimum	148.071	97.533	3	255	0	0	66.533	59.067	14441.8	812353
640 Tracings
Image	Tracing	Cluster	Type	Label	Length [micron]	Mean Val [a.u.]	SD Val [a.u.]	Min Val [a.u.]	Max Val [a.u.]
MAX_VA DIV1 neuron #29_640_2x1	N1	Default	Primary	Default	9.937	8.773	4.883	3	20
MAX_VA DIV1 neuron #29_640_2x1	N2	Default	Primary	Default	46.085	24.62	7.393	10	44
MAX_VA DIV1 neuron #29_640_2x1	N3	Default	Primary	Default	12.253	16.07	5.857	5	44
MAX_VA DIV1 neuron #29_640_2x1	N4	Default	Primary	Default	7.624	13.107	5.037	2	21
640 Groups
Image	Cluster	Type	Count	Sum Len [micron]	Mean Len [micron]	SD Len [micron]	Min Len [micron]	Max Len [micron]	Mean Val [a.u.]	SD Val [a.u.]	Min Val [a.u.]	Max Val [a.u.]
MAX_VA DIV1 neuron #29_640_2x1	All	All	4	75.899	18.975	18.172	7.624	46.085	19.99	8.975	2	44
Image 21
VA DIV1 neuron #30_all
Electroporation efficency by measuring GFP efficency with "Minimum" ROI (only covering soma)
		Label	Area	Mean	Min	Max	BX	BY	Width	Height	IntDen	RawIntDen
488	1	C1-MAX_VA DIV1 neuron #30_all.nd2:VA DIV1 neuron #30_all_Minimum	86.88	177.036	119	255	25.867	24.133	12.533	10	15380.9	865177
640	2	C2-MAX_VA DIV1 neuron #30_all.nd2:VA DIV1 neuron #30_all_Minimum	86.88	172.735	51	255	25.867	24.133	12.533	10	15007.2	844154
405	3	C3-MAX_VA DIV1 neuron #30_all.nd2:VA DIV1 neuron #30_all_Minimum	86.88	57.912	3	167	25.867	24.133	12.533	10	5031.38	283015
640 Tracings
Image	Tracing	Cluster	Type	Label	Length [micron]	Mean Val [a.u.]	SD Val [a.u.]	Min Val [a.u.]	Max Val [a.u.]
MAX_VA DIV1 neuron #30_640_1x1	N1	Default	Primary	Default	25.456	54.532	33.077	3	98
MAX_VA DIV1 neuron #30_640_1x1	N2	Default	Primary	Default	23.142	47.295	19.805	13	101
MAX_VA DIV1 neuron #30_640_1x1	N3	Default	Primary	Default	12.791	88.358	14.471	26	102
MAX_VA DIV1 neuron #30_640_1x1	N4	Default	Primary	Default	17.353	62.548	32.519	10	97
MAX_VA DIV1 neuron #30_640_1x1	N5	Default	Secondary	Default	12.183	12.605	6.384	3	32
640 Groups
Image	Cluster	Type	Count	Sum Len [micron]	Mean Len [micron]	SD Len [micron]	Min Len [micron]	Max Len [micron]	Mean Val [a.u.]	SD Val [a.u.]	Min Val [a.u.]	Max Val [a.u.]
MAX_VA DIV1 neuron #30_640_1x1	All	All	5	90.925	18.185	5.985	12.183	25.456	52.944	32.598	3	102

## Sheet: WT DIV2
V409 neuron prep_08.24.2020
* all .nd2 images were converted into an 8-bit grayscale .tiff in order to be analyzed in NeuronJ (imageJ plugin) *
Scale is set at 7.5µm/pixel
Image 1
WT DIV2 neuron #1_all (z 6-16)
Electroporation efficency by measuring GFP efficency with "Minimum" ROI (only covering soma)
		Label	Area	Mean	Min	Max	BX	BY	Width	Height	IntDen	RawIntDen
488	1	C1-MAX_WT DIV2 neuron #1_all_2x1.nd2:WT DIV2 neuron #1_all_2x1_M...	67.253	138.806	99	255	34.4	19.333	13.067	10.133	9335.18	525104
640	2	C2-MAX_WT DIV2 neuron #1_all_2x1.tif:WT DIV2 neuron #1_all_2x1_M...	67.253	92.478	12	255	34.4	19.333	13.067	10.133	6219.43	349843
405	3	C3-MAX_WT DIV2 neuron #1_all_2x1.nd2:WT DIV2 neuron #1_all_2x1_M...	67.253	53.884	3	120	34.4	19.333	13.067	10.133	3623.88	203843
640 Tracings
Image	Tracing	Cluster	Type	Label	Length [micron]	Mean Val [a.u.]	SD Val [a.u.]	Min Val [a.u.]	Max Val [a.u.]
C2-MAX_WT DIV2 neuron #1_all_2x1	N1	Default	Primary	Default	16.372	44.293	16.27	17	83
C2-MAX_WT DIV2 neuron #1_all_2x1	N2	Default	Primary	Default	83.958	83.663	28.104	16	153
C2-MAX_WT DIV2 neuron #1_all_2x1	N3	Default	Primary	Default	9.398	37.59	15.254	10	67
C2-MAX_WT DIV2 neuron #1_all_2x1	N4	Default	Primary	Default	14.506	49.475	25.928	10	106
C2-MAX_WT DIV2 neuron #1_all_2x1	N5	Default	Primary	Default	16.088	58.455	18.937	20	113
C2-MAX_WT DIV2 neuron #1_all_2x1	N6	Default	Primary	Default	9.663	34.864	16.129	4	58
640 Groups
Image	Cluster	Type	Count	Sum Len [micron]	Mean Len [micron]	SD Len [micron]	Min Len [micron]	Max Len [micron]	Mean Val [a.u.]	SD Val [a.u.]	Min Val [a.u.]	Max Val [a.u.]
C2-MAX_WT DIV2 neuron #1_all_2x1	All	All	6	149.986	24.998	29.047	9.398	83.958	66.915	31.231	4	153
Image 2
WT DIV2 neuron #2_all
Electroporation efficency by measuring GFP efficency with "Minimum" ROI (only covering soma)
		Label	Area	Mean	Min	Max	BX	BY	Width	Height	IntDen	RawIntDen
488	1	C1-MAX_WT DIV2 neuron #2_all_2x2.nd2:WT DIV2 neuron #2_all_2x2_M...	63.716	159.646	103	255	69.467	102.8	19.467	12	10172	572173
640	2	C2-MAX_WT DIV2 neuron #2_all_2x2.tif:WT DIV2 neuron #2_all_2x2_M...	63.716	128.355	15	242	69.467	102.8	19.467	12	8178.19	460023
405	3	C3-MAX_WT DIV2 neuron #2_all_2x2.nd2:WT DIV2 neuron #2_all_2x2_M...	63.716	47.682	3	121	69.467	102.8	19.467	12	3038.08	170892
640 Tracings
Image	Tracing	Cluster	Type	Label	Length [micron]	Mean Val [a.u.]	SD Val [a.u.]	Min Val [a.u.]	Max Val [a.u.]
C2-MAX_WT DIV2 neuron #2_all_2x2	N1	Default	Primary	Default	6.389	16.195	7.701	4	48
C2-MAX_WT DIV2 neuron #2_all_2x2	N2	Default	Primary	Default	11.406	99.058	35.164	20	137
C2-MAX_WT DIV2 neuron #2_all_2x2	N3	Default	Primary	Default	155.193	133.511	17.914	17	153
640 Groups
Image	Cluster	Type	Count	Sum Len [micron]	Mean Len [micron]	SD Len [micron]	Min Len [micron]	Max Len [micron]	Mean Val [a.u.]	SD Val [a.u.]	Min Val [a.u.]	Max Val [a.u.]
C2-MAX_WT DIV2 neuron #2_all_2x2	All	All	3	172.988	57.663	84.501	6.389	155.193	126.884	30.041	4	153
Image 3
WT DIV2 neuron #3_all
Electroporation efficency by measuring GFP efficency with "Minimum" ROI (only covering soma)
		Label	Area	Mean	Min	Max	BX	BY	Width	Height	IntDen	RawIntDen
488	1	C1-MAX_WT DIV2 neuron #3_all_1x1.nd2:WT DIV2 neuron #3_all_1x1_M...	66.613	96.861	70	255	14.4	0	47.067	33.467	6452.27	362940
640	2	C2-MAX_WT DIV2 neuron #3_all_1x1.tif:WT DIV2 neuron #3_all_1x1_M...	66.613	98.05	6	255	14.4	0	47.067	33.467	6531.47	367395
405	3	C3-MAX_WT DIV2 neuron #3_all_1x1.nd2:WT DIV2 neuron #3_all_1x1_M...	66.613	48.426	2	155	14.4	0	47.067	33.467	3225.81	181452
640 Tracings
Image	Tracing	Cluster	Type	Label	Length [micron]	Mean Val [a.u.]	SD Val [a.u.]	Min Val [a.u.]	Max Val [a.u.]
C2-MAX_WT DIV2 neuron #3_all_1x1	N1	Default	Primary	Default	10.957	33.07	9.142	10	51
C2-MAX_WT DIV2 neuron #3_all_1x1	N2	Default	Primary	Default	35.541	29.748	20.568	2	76
C2-MAX_WT DIV2 neuron #3_all_1x1	N3	Default	Primary	Default	55.118	67.997	28.457	9	129
640 Groups
Image	Cluster	Type	Count	Sum Len [micron]	Mean Len [micron]	SD Len [micron]	Min Len [micron]	Max Len [micron]	Mean Val [a.u.]	SD Val [a.u.]	Min Val [a.u.]	Max Val [a.u.]
C2-MAX_WT DIV2 neuron #3_all_1x1	All	All	3	101.617	33.872	22.128	10.957	55.118	50.59	30.744	2	129
Image 4
WT DIV2 neuron #4_all
Electroporation efficency by measuring GFP efficency with "Minimum" ROI (only covering soma)
		Label	Area	Mean	Min	Max	BX	BY	Width	Height	IntDen	RawIntDen
488	1	C1-MAX_WT DIV2 neuron #4_all_3x2.nd2:WT DIV2 neuron #4_all_3x2_M...	40.284	152.901	133	255	127.867	77.733	24.267	18	6159.52	346473
640	2	C2-MAX_WT DIV2 neuron #4_all_3x2.tif:WT DIV2 neuron #4_all_3x2_M...	40.284	43.845	14	144	127.867	77.733	24.267	18	1766.26	99352
405	3	C3-MAX_WT DIV2 neuron #4_all_3x2.nd2:WT DIV2 neuron #4_all_3x2_M...	40.284	47.728	3	104	127.867	77.733	24.267	18	1922.68	108151
640 Tracings
Image	Tracing	Cluster	Type	Label	Length [micron]	Mean Val [a.u.]	SD Val [a.u.]	Min Val [a.u.]	Max Val [a.u.]
C2-MAX_WT DIV2 neuron #4_all_3x2	N1	Default	Primary	Default	12.383	35.868	11.623	10	53
C2-MAX_WT DIV2 neuron #4_all_3x2	N2	Default	Primary	Default	9.289	44.03	15.377	9	73
C2-MAX_WT DIV2 neuron #4_all_3x2	N3	Default	Primary	Default	10.232	21.447	7.049	6	46
C2-MAX_WT DIV2 neuron #4_all_3x2	N4	Default	Primary	Default	112.351	76.026	29.674	17	144
C2-MAX_WT DIV2 neuron #4_all_3x2	N5	Default	Secondary	Default	32.841	31.668	8.64	13	54
640 Groups
Image	Cluster	Type	Count	Sum Len [micron]	Mean Len [micron]	SD Len [micron]	Min Len [micron]	Max Len [micron]	Mean Val [a.u.]	SD Val [a.u.]	Min Val [a.u.]	Max Val [a.u.]
C2-MAX_WT DIV2 neuron #4_all_3x2	All	All	5	177.097	35.419	44.082	9.289	112.351	59.343	32.327	6	144
Image 5
WT DIV2 neuron #5_all
Electroporation efficency by measuring GFP efficency with "Minimum" ROI (only covering soma)
		Label	Area	Mean	Min	Max	BX	BY	Width	Height	IntDen	RawIntDen
488	1	C1-MAX_WT DIV2 neuron #5_all_1x2.nd2:WT DIV2 neuron #5_all_1x2_M...	58.151	139.17	93	255	11.2	36.933	28.533	47.6	8092.91	455226
640	2	C2-MAX_WT DIV2 neuron #5_all_1x2.nd2:WT DIV2 neuron #5_all_1x2_M...	58.151	90.138	10	248	11.2	36.933	28.533	47.6	5241.6	294840
405	3	C3-MAX_WT DIV2 neuron #5_all_1x2.nd2:WT DIV2 neuron #5_all_1x2_M...	58.151	56.356	3	134	11.2	36.933	28.533	47.6	3277.16	184340
640 Tracings
Image	Tracing	Cluster	Type	Label	Length [micron]	Mean Val [a.u.]	SD Val [a.u.]	Min Val [a.u.]	Max Val [a.u.]
C2-MAX_WT DIV2 neuron #5_all_1x2	N1	Default	Primary	Default	16.484	57.73	23.189	13	110
C2-MAX_WT DIV2 neuron #5_all_1x2	N2	Default	Primary	Default	69.666	85.697	39.602	4	152
C2-MAX_WT DIV2 neuron #5_all_1x2	N3	Default	Primary	Default	9.172	43.69	16.355	16	71
C2-MAX_WT DIV2 neuron #5_all_1x2	N4	Default	Primary	Default	5.999	33.75	10.338	11	57
C2-MAX_WT DIV2 neuron #5_all_1x2	N5	Default	Primary	Default	21.327	106.968	33.564	25	149
C2-MAX_WT DIV2 neuron #5_all_1x2	N6	Default	Primary	Default	9.554	18.557	9.727	5	43
640 Groups
Image	Cluster	Type	Count	Sum Len [micron]	Mean Len [micron]	SD Len [micron]	Min Len [micron]	Max Len [micron]	Mean Val [a.u.]	SD Val [a.u.]	Min Val [a.u.]	Max Val [a.u.]
C2-MAX_WT DIV2 neuron #5_all_1x2	All	All	6	132.202	22.034	23.993	5.999	69.666	75.895	41.66	4	152
Image 6
WT DIV2 neuron #6_all
Electroporation efficency by measuring GFP efficency with "Minimum" ROI (only covering soma)
		Label	Area	Mean	Min	Max	BX	BY	Width	Height	IntDen	RawIntDen
488	1	C1-MAX_WT DIV2 neuron #6_all_2x1.nd2:WT DIV2 neuron #6_all_2x1_D...	100.036	107.883	59	255	43.467	2	45.067	54	10792.2	607059
640	2	C2-MAX_WT DIV2 neuron #6_all_2x1.nd2:WT DIV2 neuron #6_all_2x1_D...	100.036	52.555	4	197	43.467	2	45.067	54	5257.35	295726
405	3	C3-MAX_WT DIV2 neuron #6_all_2x1.nd2:WT DIV2 neuron #6_all_2x1_D...	100.036	57.799	3	171	43.467	2	45.067	54	5781.99	325237
640 Tracings
Image	Tracing	Cluster	Type	Label	Length [micron]	Mean Val [a.u.]	SD Val [a.u.]	Min Val [a.u.]	Max Val [a.u.]
C2-MAX_WT DIV2 neuron #6_all_2x1	N1	Default	Primary	Default	13.545	45.358	25.88	8	98
C2-MAX_WT DIV2 neuron #6_all_2x1	N2	Default	Primary	Default	13.601	47.228	16.132	7	77
C2-MAX_WT DIV2 neuron #6_all_2x1	N3	Default	Primary	Default	13.032	34.023	11.182	7	58
C2-MAX_WT DIV2 neuron #6_all_2x1	N4	Default	Primary	Default	9.465	26	9.306	8	44
C2-MAX_WT DIV2 neuron #6_all_2x1	N5	Default	Primary	Default	11.7	34.553	18.219	7	69
C2-MAX_WT DIV2 neuron #6_all_2x1	N6	Default	Primary	Default	56.942	66.178	17.612	20	104
C2-MAX_WT DIV2 neuron #6_all_2x1	N7	Default	Primary	Default	7.256	24.348	12.349	7	45
640 Groups
Image	Cluster	Type	Count	Sum Len [micron]	Mean Len [micron]	SD Len [micron]	Min Len [micron]	Max Len [micron]	Mean Val [a.u.]	SD Val [a.u.]	Min Val [a.u.]	Max Val [a.u.]
C2-MAX_WT DIV2 neuron #6_all_2x1	All	All	7	125.542	17.935	17.36	7.256	56.942	50.82	23.383	7	104
Image 7
WT DIV2 neuron #8_all
Electroporation efficency by measuring GFP efficency with "Minimum" ROI (only covering soma)
		Label	Area	Mean	Min	Max	BX	BY	Width	Height	IntDen	RawIntDen
488	1	C1-MAX_WT DIV2 neuron #8_all_1x2.nd2:WT DIV2 neuron #8_all_1x2_M...	58.916	132.813	95	255	0.533	15.067	52.933	87.6	7824.73	440141
640	2	C2-MAX_WT DIV2 neuron #8_all_1x2.nd2:WT DIV2 neuron #8_all_1x2_M...	58.916	59.447	5	173	0.533	15.067	52.933	87.6	3502.38	197009
405	3	C3-MAX_WT DIV2 neuron #8_all_1x2.nd2:WT DIV2 neuron #8_all_1x2_M...	58.916	26.662	1	62	0.533	15.067	52.933	87.6	1570.81	88358
640 Tracings
Image	Tracing	Cluster	Type	Label	Length [micron]	Mean Val [a.u.]	SD Val [a.u.]	Min Val [a.u.]	Max Val [a.u.]
C2-MAX_WT DIV2 neuron #8_all_1x2	N1	Default	Primary	Default	4.855	17.028	3.376	11	25
C2-MAX_WT DIV2 neuron #8_all_1x2	N2	Default	Primary	Default	7.166	61.036	11.045	34	79
C2-MAX_WT DIV2 neuron #8_all_1x2	N3	Default	Primary	Default	85.627	90.722	24.528	19	141
C2-MAX_WT DIV2 neuron #8_all_1x2	N4	Default	Primary	Default	6.759	14.304	7.577	4	34
640 Groups
Image	Cluster	Type	Count	Sum Len [micron]	Mean Len [micron]	SD Len [micron]	Min Len [micron]	Max Len [micron]	Mean Val [a.u.]	SD Val [a.u.]	Min Val [a.u.]	Max Val [a.u.]
C2-MAX_WT DIV2 neuron #8_all_1x2	All	All	4	104.407	26.102	39.696	4.855	85.627	79.677	33.183	4	141
Image 8
WT DIV2 neuron #9_all
Electroporation efficency by measuring GFP efficency with "Minimum" ROI (only covering soma)
		Label	Area	Mean	Min	Max	BX	BY	Width	Height	IntDen	RawIntDen
488	1	C1-MAX_WT DIV2 neuron #9_all_2x1.nd2:WT DIV2 neuron #9_all_2x1_M...	110.596	122.845	93	255	51.067	16.133	57.333	18.8	13586.1	764217
640	2	C2-MAX_WT DIV2 neuron #9_all_2x1.nd2:WT DIV2 neuron #9_all_2x1_M...	110.596	87.691	13	249	51.067	16.133	57.333	18.8	9698.26	545527
405	3	C3-MAX_WT DIV2 neuron #9_all_2x1.nd2:WT DIV2 neuron #9_all_2x1_M...	110.596	44.927	3	255	51.067	16.133	57.333	18.8	4968.75	279492
640 Tracings
Image	Tracing	Cluster	Type	Label	Length [micron]	Mean Val [a.u.]	SD Val [a.u.]	Min Val [a.u.]	Max Val [a.u.]
C2-MAX_WT DIV2 neuron #9_all_2x1	N1	Default	Primary	Default	5.407	48.732	15.351	17	95
C2-MAX_WT DIV2 neuron #9_all_2x1	N2	Default	Primary	Default	172.566	93.73	41.502	8	151
C2-MAX_WT DIV2 neuron #9_all_2x1	N3	Default	Primary	Default	12.314	82.33	32.7	20	138
C2-MAX_WT DIV2 neuron #9_all_2x1	N4	Default	Secondary	Default	6.679	52.174	17.126	18	79
640 Groups
Image	Cluster	Type	Count	Sum Len [micron]	Mean Len [micron]	SD Len [micron]	Min Len [micron]	Max Len [micron]	Mean Val [a.u.]	SD Val [a.u.]	Min Val [a.u.]	Max Val [a.u.]
C2-MAX_WT DIV2 neuron #9_all_2x1	All	All	4	196.966	49.241	82.271	5.407	172.566	90.176	41.228	8	151
Image 9
WT DIV2 neuron #11_all (z 4-11)
Electroporation efficency by measuring GFP efficency with "Minimum" ROI (only covering soma)
		Label	Area	Mean	Min	Max	BX	BY	Width	Height	IntDen	RawIntDen
488	1	C1-MAX_WT DIV2 neuron #11_all_2x1.nd2:WT DIV2 neuron #11_all_2x1_...	77.209	160.49	112	255	40.933	22.4	58.933	10.933	12391.3	697010
640	2	C2-MAX_WT DIV2 neuron #11_all_2x1.nd2:WT DIV2 neuron #11_all_2x1_...	77.209	137.452	40	242	40.933	22.4	58.933	10.933	10612.5	596953
405	3	C3-MAX_WT DIV2 neuron #11_all_2x1.nd2:WT DIV2 neuron #11_all_2x1_...	77.209	49.955	3	118	40.933	22.4	58.933	10.933	3856.98	216955
640 Tracings
Image	Tracing	Cluster	Type	Label	Length [micron]	Mean Val [a.u.]	SD Val [a.u.]	Min Val [a.u.]	Max Val [a.u.]
C2-MAX_WT DIV2 neuron #11_all_2x1	N1	Default	Primary	Default	34.232	27.925	28.938	1	129
C2-MAX_WT DIV2 neuron #11_all_2x1	N2	Default	Primary	Default	15.259	58.465	35.163	10	136
C2-MAX_WT DIV2 neuron #11_all_2x1	N3	Default	Primary	Default	8.25	106.475	36.533	13	140
C2-MAX_WT DIV2 neuron #11_all_2x1	N4	Default	Primary	Default	73.704	132.026	18.327	18	148
C2-MAX_WT DIV2 neuron #11_all_2x1	N5	Default	Primary	Default	7.38	31.196	13.923	12	82
C2-MAX_WT DIV2 neuron #11_all_2x1	N6	Default	Primary	Default	11.225	113.829	30.4	35	139
C2-MAX_WT DIV2 neuron #11_all_2x1	N7	Default	Primary	Default	11.379	99.712	40.844	13	142
640 Groups
Image	Cluster	Type	Count	Sum Len [micron]	Mean Len [micron]	SD Len [micron]	Min Len [micron]	Max Len [micron]	Mean Val [a.u.]	SD Val [a.u.]	Min Val [a.u.]	Max Val [a.u.]
C2-MAX_WT DIV2 neuron #11_all_2x1	All	All	7	161.428	23.061	24.125	7.38	73.704	93.797	51.193	1	148
Image 10
WT DIV2 neuron #12_all
Electroporation efficency by measuring GFP efficency with "Minimum" ROI (only covering soma)
		Label	Area	Mean	Min	Max	BX	BY	Width	Height	IntDen	RawIntDen
488	1	C1-MAX_WT DIV2 neuron #12_all_3x3.nd2:WT DIV2 neuron #12_all_3x3_...	52.853	157.556	116	255	72.933	40.4	62.4	42.4	8327.38	468415
640	2	C2-MAX_WT DIV2 neuron #12_all_3x3.nd2:WT DIV2 neuron #12_all_3x3_...	52.853	138.805	11	249	72.933	40.4	62.4	42.4	7336.28	412666
405	3	C3-MAX_WT DIV2 neuron #12_all_3x3.nd2:WT DIV2 neuron #12_all_3x3_...	52.853	54.335	3	117	72.933	40.4	62.4	42.4	2871.79	161538
640 Tracings
Image	Tracing	Cluster	Type	Label	Length [micron]	Mean Val [a.u.]	SD Val [a.u.]	Min Val [a.u.]	Max Val [a.u.]
C2-MAX_WT DIV2 neuron #12_all_3x3	N1	Default	Primary	Default	27.098	71.506	41.354	7	141
C2-MAX_WT DIV2 neuron #12_all_3x3	N2	Default	Primary	Default	8.51	44.268	14.347	18	64
C2-MAX_WT DIV2 neuron #12_all_3x3	N3	Default	Primary	Default	135.987	87.121	38.953	8	149
C2-MAX_WT DIV2 neuron #12_all_3x3	N4	Default	Primary	Default	20.218	107.069	28.181	31	141
C2-MAX_WT DIV2 neuron #12_all_3x3	N5	Default	Secondary	Default	5.664	36.293	18.644	8	65
C2-MAX_WT DIV2 neuron #12_all_3x3	N6	Default	Secondary	Default	6.91	25	24.148	1	81
640 Groups
Image	Cluster	Type	Count	Sum Len [micron]	Mean Len [micron]	SD Len [micron]	Min Len [micron]	Max Len [micron]	Mean Val [a.u.]	SD Val [a.u.]	Min Val [a.u.]	Max Val [a.u.]
C2-MAX_WT DIV2 neuron #12_all_3x3	All	All	6	204.388	34.065	50.647	5.664	135.987	81.753	40.834	1	149
Image 11
WT DIV2 neuron #13_all (good for pub.)
Electroporation efficency by measuring GFP efficency with "Minimum" ROI (only covering soma)
		Label	Area	Mean	Min	Max	BX	BY	Width	Height	IntDen	RawIntDen
488	1	C1-MAX_WT DIV2 neuron #13_all_2x1.nd2:WT DIV2 neuron #13_all_2x1_Yen	122.364	30.219	17	255	4.8	6.667	103.733	56.4	3697.74	207998
640	2	C2-MAX_WT DIV2 neuron #13_all_2x1.nd2:WT DIV2 neuron #13_all_2x1_Yen	122.364	92.866	2	252	4.8	6.667	103.733	56.4	11363.5	639198
405	3	C3-MAX_WT DIV2 neuron #13_all_2x1.nd2:WT DIV2 neuron #13_all_2x1_Yen	122.364	32.662	2	103	4.8	6.667	103.733	56.4	3996.62	224810
640 Tracings
Image	Tracing	Cluster	Type	Label	Length [micron]	Mean Val [a.u.]	SD Val [a.u.]	Min Val [a.u.]	Max Val [a.u.]
C2-MAX_WT DIV2 neuron #13_all_2x1	N1	Default	Primary	Default	21.86	66.801	24.336	8	112
C2-MAX_WT DIV2 neuron #13_all_2x1	N2	Default	Primary	Default	12.341	28.679	11.366	9	53
C2-MAX_WT DIV2 neuron #13_all_2x1	N3	Default	Primary	Default	9.735	52.789	14.105	19	88
C2-MAX_WT DIV2 neuron #13_all_2x1	N4	Default	Primary	Default	10.652	90.985	37.698	22	151
C2-MAX_WT DIV2 neuron #13_all_2x1	N5	Default	Primary	Default	81.423	104.229	34.843	16	152
C2-MAX_WT DIV2 neuron #13_all_2x1	N6	Default	Primary	Default	14.367	28.047	8.916	14	47
C2-MAX_WT DIV2 neuron #13_all_2x1	N7	Default	Primary	Default	5.836	31.278	13.635	13	62
C2-MAX_WT DIV2 neuron #13_all_2x1	N8	Default	Primary	Default	9.426	45.296	18.08	13	76
640 Groups
Image	Cluster	Type	Count	Sum Len [micron]	Mean Len [micron]	SD Len [micron]	Min Len [micron]	Max Len [micron]	Mean Val [a.u.]	SD Val [a.u.]	Min Val [a.u.]	Max Val [a.u.]
C2-MAX_WT DIV2 neuron #13_all_2x1	All	All	8	165.64	20.705	24.979	5.836	81.423	77.213	41.974	8	152
Image 12
WT DIV2 neuron #15_all
Electroporation efficency by measuring GFP efficency with "Minimum" ROI (only covering soma)
		Label	Area	Mean	Min	Max	BX	BY	Width	Height	IntDen	RawIntDen
488	1	C1-MAX_WT DIV2 neuron #15_all_1x1.nd2:WT DIV2 neuron #15_all_1x1_...	55.751	146.426	101	255	37.333	4.4	18.533	27.067	8163.43	459193
640	2	C2-MAX_WT DIV2 neuron #15_all_1x1.nd2:WT DIV2 neuron #15_all_1x1_...	55.751	164.357	37	254	37.333	4.4	18.533	27.067	9163.11	515425
405	3	C3-MAX_WT DIV2 neuron #15_all_1x1.nd2:WT DIV2 neuron #15_all_1x1_...	55.751	62.169	3	141	37.333	4.4	18.533	27.067	3465.99	194962
640 Tracings
Image	Tracing	Cluster	Type	Label	Length [micron]	Mean Val [a.u.]	SD Val [a.u.]	Min Val [a.u.]	Max Val [a.u.]
C2-MAX_WT DIV2 neuron #15_all_1x1	N1	Default	Primary	Default	13.253	110.56	44.702	19	145
C2-MAX_WT DIV2 neuron #15_all_1x1	N2	Default	Primary	Default	15.727	109.167	37.916	16	140
C2-MAX_WT DIV2 neuron #15_all_1x1	N3	Default	Primary	Default	144.025	117.43	31.883	2	151
C2-MAX_WT DIV2 neuron #15_all_1x1	N4	Default	Secondary	Default	14.134	73.407	37.882	10	144
C2-MAX_WT DIV2 neuron #15_all_1x1	N5	Default	Secondary	Default	8.131	101.148	30.648	34	139
640 Groups
Image	Cluster	Type	Count	Sum Len [micron]	Mean Len [micron]	SD Len [micron]	Min Len [micron]	Max Len [micron]	Mean Val [a.u.]	SD Val [a.u.]	Min Val [a.u.]	Max Val [a.u.]
C2-MAX_WT DIV2 neuron #15_all_1x1	All	All	5	195.269	39.054	58.749	8.131	144.025	112.416	35.685	2	151
Image 13
WT DIV2 neuron #17_all
Electroporation efficency by measuring GFP efficency with "Minimum" ROI (only covering soma)
		Label	Area	Mean	Min	Max	BX	BY	Width	Height	IntDen	RawIntDen
488	1	C1-MAX_WT DIV2 neuron #17_all_1x2.nd2:WT DIV2 neuron #17_all_1x2_...	78.827	162.228	103	255	32.933	42.667	9.6	50.4	12787.9	719319
640	2	C2-MAX_WT DIV2 neuron #17_all_1x2.nd2:WT DIV2 neuron #17_all_1x2_...	78.827	162.352	27	251	32.933	42.667	9.6	50.4	12797.7	719869
405	3	C3-MAX_WT DIV2 neuron #17_all_1x2.nd2:WT DIV2 neuron #17_all_1x2_...	78.827	53.348	3	138	32.933	42.667	9.6	50.4	4205.28	236547
640 Tracings
Image	Tracing	Cluster	Type	Label	Length [micron]	Mean Val [a.u.]	SD Val [a.u.]	Min Val [a.u.]	Max Val [a.u.]
C2-MAX_WT DIV2 neuron #17_all_1x2	N1	Default	Primary	Default	34.287	61.772	36.48	16	145
C2-MAX_WT DIV2 neuron #17_all_1x2	N2	Default	Primary	Default	16.283	84.509	38.296	16	140
C2-MAX_WT DIV2 neuron #17_all_1x2	N3	Default	Primary	Default	8.26	54.77	17.876	13	84
C2-MAX_WT DIV2 neuron #17_all_1x2	N4	Default	Primary	Default	4.53	30.677	17.596	4	55
C2-MAX_WT DIV2 neuron #17_all_1x2	N5	Default	Primary	Default	6.412	38.522	16.007	19	68
C2-MAX_WT DIV2 neuron #17_all_1x2	N6	Default	Primary	Default	49.57	127.233	35.182	16	153
C2-MAX_WT DIV2 neuron #17_all_1x2	N7	Default	Primary	Default	22.332	117.087	30.752	31	143
C2-MAX_WT DIV2 neuron #17_all_1x2	N8	Default	Primary	Default	14.182	99.119	36.755	34	141
C2-MAX_WT DIV2 neuron #17_all_1x2	N9	Default	Secondary	Default	5.427	29.583	18.385	7	95
640 Groups
Image	Cluster	Type	Count	Sum Len [micron]	Mean Len [micron]	SD Len [micron]	Min Len [micron]	Max Len [micron]	Mean Val [a.u.]	SD Val [a.u.]	Min Val [a.u.]	Max Val [a.u.]
C2-MAX_WT DIV2 neuron #17_all_1x2	All	All	9	161.284	17.92	15.276	4.53	49.57	92.385	46.805	4	153
Image 14
WT DIV2 neuron #18_all
Electroporation efficency by measuring GFP efficency with "Minimum" ROI (only covering soma)
		Label	Area	Mean	Min	Max	BX	BY	Width	Height	IntDen	RawIntDen
488	1	C1-MAX_WT DIV2 neuron #18_all_1x1.nd2:WT DIV2 neuron #18_all_1x1_...	84.64	160.566	109	255	15.467	21.867	12.667	10.4	13590.3	764454
640	2	C2-MAX_WT DIV2 neuron #18_all_1x1.nd2:WT DIV2 neuron #18_all_1x1_...	84.64	172.095	38	245	15.467	21.867	12.667	10.4	14566.2	819346
405	3	C3-MAX_WT DIV2 neuron #18_all_1x1.nd2:WT DIV2 neuron #18_all_1x1_...	84.64	34.596	3	97	15.467	21.867	12.667	10.4	2928.2	164711
640 Tracings
Image	Tracing	Cluster	Type	Label	Length [micron]	Mean Val [a.u.]	SD Val [a.u.]	Min Val [a.u.]	Max Val [a.u.]
C2-MAX_WT DIV2 neuron #18_all_1x1	N1	Default	Primary	Default	4.033	59.129	21.633	30	103
C2-MAX_WT DIV2 neuron #18_all_1x1	N2	Default	Primary	Default	77.953	133.365	14.615	48	149
C2-MAX_WT DIV2 neuron #18_all_1x1	N3	Default	Primary	Default	6.425	92.804	24.628	40	138
C2-MAX_WT DIV2 neuron #18_all_1x1	N4	Default	Primary	Default	12.651	102.531	41.977	20	141
C2-MAX_WT DIV2 neuron #18_all_1x1	N5	Default	Primary	Default	34.563	114.022	38.533	19	148
C2-MAX_WT DIV2 neuron #18_all_1x1	N6	Default	Primary	Default	14.524	108.126	40.631	13	149
C2-MAX_WT DIV2 neuron #18_all_1x1	N7	Default	Primary	Default	7.806	74.946	45.483	9	137
C2-MAX_WT DIV2 neuron #18_all_1x1	N8	Default	Secondary	Default	3.262	121.905	24.724	61	143
640 Groups
Image	Cluster	Type	Count	Sum Len [micron]	Mean Len [micron]	SD Len [micron]	Min Len [micron]	Max Len [micron]	Mean Val [a.u.]	SD Val [a.u.]	Min Val [a.u.]	Max Val [a.u.]
C2-MAX_WT DIV2 neuron #18_all_1x1	All	All	8	161.219	20.152	25.418	3.262	77.953	117.237	35.044	9	149
Image 15
WT DIV2 neuron #20_all (z 5-15)
Electroporation efficency by measuring GFP efficency with "Minimum" ROI (only covering soma)
		Label	Area	Mean	Min	Max	BX	BY	Width	Height	IntDen	RawIntDen
488	1	C1-MAX_WT DIV2 neuron #20_all_1x2.nd2:WT DIV2 neuron #20_all_1x2_...	161.333	107.849	60	255	22.267	4.8	27.467	110.4	17399.6	978727
640	2	C2-MAX_WT DIV2 neuron #20_all_1x2.nd2:WT DIV2 neuron #20_all_1x2_...	161.333	107.904	15	255	22.267	4.8	27.467	110.4	17408.6	979232
405	3	C3-MAX_WT DIV2 neuron #20_all_1x2.nd2:WT DIV2 neuron #20_all_1x2_...	161.333	38.63	2	129	22.267	4.8	27.467	110.4	6232.36	350570
640 Tracings
Image	Tracing	Cluster	Type	Label	Length [micron]	Mean Val [a.u.]	SD Val [a.u.]	Min Val [a.u.]	Max Val [a.u.]
C2-MAX_WT DIV2 neuron #20_all_1x2	N1	Default	Primary	Default	97.356	121.474	25.867	37	150
C2-MAX_WT DIV2 neuron #20_all_1x2	N2	Default	Primary	Default	8.873	47.661	24.456	8	96
C2-MAX_WT DIV2 neuron #20_all_1x2	N3	Default	Primary	Default	9.638	48.62	19.184	11	74
C2-MAX_WT DIV2 neuron #20_all_1x2	N4	Default	Primary	Default	5.863	65.756	19.132	15	88
C2-MAX_WT DIV2 neuron #20_all_1x2	N5	Default	Primary	Default	7.908	32.786	14.151	5	60
C2-MAX_WT DIV2 neuron #20_all_1x2	N6	Default	Secondary	Default	6.127	52.739	10.831	33	69
640 Groups
Image	Cluster	Type	Count	Sum Len [micron]	Mean Len [micron]	SD Len [micron]	Min Len [micron]	Max Len [micron]	Mean Val [a.u.]	SD Val [a.u.]	Min Val [a.u.]	Max Val [a.u.]
C2-MAX_WT DIV2 neuron #20_all_1x2	All	All	6	135.766	22.628	36.64	5.863	97.356	100.407	41.188	5	150
Image 16
WT DIV2 neuron #21_all
Electroporation efficency by measuring GFP efficency with "Minimum" ROI (only covering soma)
		Label	Area	Mean	Min	Max	BX	BY	Width	Height	IntDen	RawIntDen
488	1	C1-MAX_WT DIV2 neuron #21_all_1x2.nd2:WT DIV2 neuron #21_all_1x2_...	66.507	143.613	97	255	32.533	36.933	17.467	18.8	9551.2	537255
640	2	C2-MAX_WT DIV2 neuron #21_all_1x2.nd2:WT DIV2 neuron #21_all_1x2_...	66.507	127.152	20	247	32.533	36.933	17.467	18.8	8456.44	475675
405	3	C3-MAX_WT DIV2 neuron #21_all_1x2.nd2:WT DIV2 neuron #21_all_1x2_...	66.507	54.425	3	124	32.533	36.933	17.467	18.8	3619.61	203603
640 Tracings
Image	Tracing	Cluster	Type	Label	Length [micron]	Mean Val [a.u.]	SD Val [a.u.]	Min Val [a.u.]	Max Val [a.u.]
C2-MAX_WT DIV2 neuron #21_all_1x2	N1	Default	Primary	Default	9.96	85.621	37.405	17	140
C2-MAX_WT DIV2 neuron #21_all_1x2	N2	Default	Primary	Default	97.574	131.162	18.981	49	152
C2-MAX_WT DIV2 neuron #21_all_1x2	N3	Default	Primary	Default	6.984	43.98	9.882	24	63
C2-MAX_WT DIV2 neuron #21_all_1x2	N4	Default	Primary	Default	15.95	118.414	36.339	14	143
640 Groups
Image	Cluster	Type	Count	Sum Len [micron]	Mean Len [micron]	SD Len [micron]	Min Len [micron]	Max Len [micron]	Mean Val [a.u.]	SD Val [a.u.]	Min Val [a.u.]	Max Val [a.u.]
C2-MAX_WT DIV2 neuron #21_all_1x2	All	All	4	130.469	32.617	43.465	6.984	97.574	121.228	32.387	14	152
Image 17
WT DIV2 neuron #22_all
Electroporation efficency by measuring GFP efficency with "Minimum" ROI (only covering soma)
		Label	Area	Mean	Min	Max	BX	BY	Width	Height	IntDen	RawIntDen
488	1	C1-MAX_WT DIV2 neuron #22_all_1x3.nd2:WT DIV2 neuron #22_all_1x3_...	72.622	178.259	122	255	27.2	58.933	9.6	11.2	12945.5	728186
640	2	C2-MAX_WT DIV2 neuron #22_all_1x3.nd2:WT DIV2 neuron #22_all_1x3_...	72.622	167.638	24	244	27.2	58.933	9.6	11.2	12174.3	684803
405	3	C3-MAX_WT DIV2 neuron #22_all_1x3.nd2:WT DIV2 neuron #22_all_1x3_...	72.622	42.833	4	109	27.2	58.933	9.6	11.2	3110.65	174974
640 Tracings
Image	Tracing	Cluster	Type	Label	Length [micron]	Mean Val [a.u.]	SD Val [a.u.]	Min Val [a.u.]	Max Val [a.u.]
C2-MAX_WT DIV2 neuron #22_all_1x3	N1	Default	Primary	Default	13.17	113.519	39.479	17	145
C2-MAX_WT DIV2 neuron #22_all_1x3	N2	Default	Primary	Default	84.074	138.691	11.248	39	151
C2-MAX_WT DIV2 neuron #22_all_1x3	N3	Default	Primary	Default	24.764	125.149	28.511	29	148
C2-MAX_WT DIV2 neuron #22_all_1x3	N4	Default	Secondary	Default	18.272	66.718	34.783	7	131
640 Groups
Image	Cluster	Type	Count	Sum Len [micron]	Mean Len [micron]	SD Len [micron]	Min Len [micron]	Max Len [micron]	Mean Val [a.u.]	SD Val [a.u.]	Min Val [a.u.]	Max Val [a.u.]
C2-MAX_WT DIV2 neuron #22_all_1x3	All	All	4	140.279	35.07	33.012	13.17	84.074	124	33.496	7	151
Image 18
WT DIV2 neuron #24_all
Electroporation efficency by measuring GFP efficency with "Minimum" ROI (only covering soma)
		Label	Area	Mean	Min	Max	BX	BY	Width	Height	IntDen	RawIntDen
488	1	C1-MAX_WT DIV2 neuron #24_all_2x1.nd2:WT DIV2 neuron #24_all_2x1_...	61.707	133.353	83	255	89.333	27.6	13.867	10.533	8228.76	462868
640	2	C2-MAX_WT DIV2 neuron #24_all_2x1.nd2:WT DIV2 neuron #24_all_2x1_...	61.707	113.951	17	255	89.333	27.6	13.867	10.533	7031.54	395524
405	3	C3-MAX_WT DIV2 neuron #24_all_2x1.nd2:WT DIV2 neuron #24_all_2x1_...	61.707	50.938	3	138	89.333	27.6	13.867	10.533	3143.2	176805
640 Tracings
Image	Tracing	Cluster	Type	Label	Length [micron]	Mean Val [a.u.]	SD Val [a.u.]	Min Val [a.u.]	Max Val [a.u.]
C2-MAX_WT DIV2 neuron #24_all_2x1	N1	Default	Primary	Default	14.55	87.176	33.892	14	148
C2-MAX_WT DIV2 neuron #24_all_2x1	N2	Default	Primary	Default	91.1	36.158	18.945	11	110
C2-MAX_WT DIV2 neuron #24_all_2x1	N3	Default	Primary	Default	7.256	28.089	9.11	10	47
C2-MAX_WT DIV2 neuron #24_all_2x1	N4	Default	Primary	Default	28.817	69.96	40.072	5	134
640 Groups
Image	Cluster	Type	Count	Sum Len [micron]	Mean Len [micron]	SD Len [micron]	Min Len [micron]	Max Len [micron]	Mean Val [a.u.]	SD Val [a.u.]	Min Val [a.u.]	Max Val [a.u.]
C2-MAX_WT DIV2 neuron #24_all_2x1	All	All	4	141.724	35.431	38.178	7.256	91.1	47.192	31.867	5	148
Image 19
WT DIV2 neuron #25_all
Electroporation efficency by measuring GFP efficency with "Minimum" ROI (only covering soma)
		Label	Area	Mean	Min	Max	BX	BY	Width	Height	IntDen	RawIntDen
488	1	C1-MAX_WT DIV2 neuron #25_all_2x1.nd2:WT DIV2 neuron #25_all_2x1_...	59.609	122.138	84	255	33.2	16.133	55.2	21.2	7280.53	409530
640	2	C2-MAX_WT DIV2 neuron #25_all_2x1.nd2:WT DIV2 neuron #25_all_2x1_...	59.609	104.92	28	242	33.2	16.133	55.2	21.2	6254.17	351797
405	3	C3-MAX_WT DIV2 neuron #25_all_2x1.nd2:WT DIV2 neuron #25_all_2x1_...	59.609	85.66	5	255	33.2	16.133	55.2	21.2	5106.12	287219
640 Tracings
Image	Tracing	Cluster	Type	Label	Length [micron]	Mean Val [a.u.]	SD Val [a.u.]	Min Val [a.u.]	Max Val [a.u.]
C2-MAX_WT DIV2 neuron #25_all_2x1	N1	Default	Primary	Default	14.468	35.455	15.115	7	70
C2-MAX_WT DIV2 neuron #25_all_2x1	N2	Default	Primary	Default	19.993	44.205	16.888	16	85
C2-MAX_WT DIV2 neuron #25_all_2x1	N3	Default	Primary	Default	8.299	24.821	11.628	8	58
C2-MAX_WT DIV2 neuron #25_all_2x1	N4	Default	Primary	Default	82.877	75.761	21.117	12	133
C2-MAX_WT DIV2 neuron #25_all_2x1	N5	Default	Primary	Default	17.314	52.81	21.864	11	102
C2-MAX_WT DIV2 neuron #25_all_2x1	N6	Default	Primary	Default	17.844	44.809	11.819	22	80
C2-MAX_WT DIV2 neuron #25_all_2x1	N7	Default	Primary	Default	19.784	52.788	14.38	23	94
C2-MAX_WT DIV2 neuron #25_all_2x1	N8	Default	Secondary	Default	15.358	57.396	21.164	13	101
640 Groups
Image	Cluster	Type	Count	Sum Len [micron]	Mean Len [micron]	SD Len [micron]	Min Len [micron]	Max Len [micron]	Mean Val [a.u.]	SD Val [a.u.]	Min Val [a.u.]	Max Val [a.u.]
C2-MAX_WT DIV2 neuron #25_all_2x1	All	All	8	195.936	24.492	23.884	8.299	82.877	58.345	24.482	7	133
Image 20
WT DIV2 neuron #26_all
Electroporation efficency by measuring GFP efficency with "Minimum" ROI (only covering soma)
		Label	Area	Mean	Min	Max	BX	BY	Width	Height	IntDen	RawIntDen
488	1	C1-MAX_WT DIV2 neuron #26_all_2x2.nd2:WT DIV2 neuron #26_all_2x2_...	63.076	162.631	123	255	47.067	38.667	8.4	13.867	10258.1	577016
640	2	C2-MAX_WT DIV2 neuron #26_all_2x2.nd2:WT DIV2 neuron #26_all_2x2_...	63.076	141.036	19	253	47.067	38.667	8.4	13.867	8895.93	500396
405	3	C3-MAX_WT DIV2 neuron #26_all_2x2.nd2:WT DIV2 neuron #26_all_2x2_...	63.076	49.338	3	124	47.067	38.667	8.4	13.867	3112.04	175052
640 Tracings
Image	Tracing	Cluster	Type	Label	Length [micron]	Mean Val [a.u.]	SD Val [a.u.]	Min Val [a.u.]	Max Val [a.u.]
C2-MAX_WT DIV2 neuron #26_all_2x2	N1	Default	Primary	Default	15.816	90.151	40.31	19	145
C2-MAX_WT DIV2 neuron #26_all_2x2	N2	Default	Primary	Default	79.687	132.935	18.514	30	151
C2-MAX_WT DIV2 neuron #26_all_2x2	N3	Default	Primary	Default	24.721	125.849	30.835	21	149
C2-MAX_WT DIV2 neuron #26_all_2x2	N4	Default	Secondary	Default	7.348	81.978	36.191	21	145
640 Groups
Image	Cluster	Type	Count	Sum Len [micron]	Mean Len [micron]	SD Len [micron]	Min Len [micron]	Max Len [micron]	Mean Val [a.u.]	SD Val [a.u.]	Min Val [a.u.]	Max Val [a.u.]
C2-MAX_WT DIV2 neuron #26_all_2x2	All	All	4	127.573	31.893	32.643	7.348	79.687	123.391	31.023	19	151
Image 21
WT DIV2 neuron #27_all
Electroporation efficency by measuring GFP efficency with "Minimum" ROI (only covering soma)
		Label	Area	Mean	Min	Max	BX	BY	Width	Height	IntDen	RawIntDen
488	1	C1-MAX_WT DIV2 neuron #27_all_2x2.nd2:WT DIV2 neuron #27_all_2x2_...	64.213	169.789	115	255	34.8	71.867	9.467	10.533	10902.7	613277
640	2	C2-MAX_WT DIV2 neuron #27_all_2x2.nd2:WT DIV2 neuron #27_all_2x2_...	64.213	150.728	39	244	34.8	71.867	9.467	10.533	9678.74	544429
405	3	C3-MAX_WT DIV2 neuron #27_all_2x2.nd2:WT DIV2 neuron #27_all_2x2_...	64.213	83.165	6	209	34.8	71.867	9.467	10.533	5340.32	300393
640 Tracings
Image	Tracing	Cluster	Type	Label	Length [micron]	Mean Val [a.u.]	SD Val [a.u.]	Min Val [a.u.]	Max Val [a.u.]
C2-MAX_WT DIV2 neuron #27_all_2x2	N1	Default	Primary	Default	15.547	98.922	33.39	27	143
C2-MAX_WT DIV2 neuron #27_all_2x2	N2	Default	Primary	Default	80.863	121.788	31.188	18	148
C2-MAX_WT DIV2 neuron #27_all_2x2	N3	Default	Primary	Default	10.961	98.901	30.243	16	139
C2-MAX_WT DIV2 neuron #27_all_2x2	N4	Default	Primary	Default	14.854	94.948	37.663	27	142
C2-MAX_WT DIV2 neuron #27_all_2x2	N5	Default	Primary	Default	16.581	99.328	27.41	29	141
C2-MAX_WT DIV2 neuron #27_all_2x2	N6	Default	Primary	Default	22.584	101.64	43.699	7	143
C2-MAX_WT DIV2 neuron #27_all_2x2	N7	Default	Secondary	Default	20.338	39.907	20.117	9	75
C2-MAX_WT DIV2 neuron #27_all_2x2	N8	Default	Secondary	Default	5.254	34.78	16.048	5	64
640 Groups
Image	Cluster	Type	Count	Sum Len [micron]	Mean Len [micron]	SD Len [micron]	Min Len [micron]	Max Len [micron]	Mean Val [a.u.]	SD Val [a.u.]	Min Val [a.u.]	Max Val [a.u.]
C2-MAX_WT DIV2 neuron #27_all_2x2	All	All	8	186.982	23.373	23.836	5.254	80.863	99.721	42.051	5	148
Image 22
WT DIV2 neuron #28_all
Electroporation efficency by measuring GFP efficency with "Minimum" ROI (only covering soma)
		Label	Area	Mean	Min	Max	BX	BY	Width	Height	IntDen	RawIntDen
488	1	C1-MAX_WT DIV2 neuron #28_all_1x2.nd2:WT DIV2 neuron #28_all_1x2_...	55.644	162.115	121	255	23.733	43.333	10.8	11.067	9020.82	507421
640	2	C2-MAX_WT DIV2 neuron #28_all_1x2.nd2:WT DIV2 neuron #28_all_1x2_...	55.644	126.202	22	255	23.733	43.333	10.8	11.067	7022.45	395013
405	3	C3-MAX_WT DIV2 neuron #28_all_1x2.nd2:WT DIV2 neuron #28_all_1x2_...	55.644	64.73	3	135	23.733	43.333	10.8	11.067	3601.87	202605
640 Tracings
Image	Tracing	Cluster	Type	Label	Length [micron]	Mean Val [a.u.]	SD Val [a.u.]	Min Val [a.u.]	Max Val [a.u.]
C2-MAX_WT DIV2 neuron #28_all_1x2	N1	Default	Primary	Default	14.923	64.865	36.825	3	139
C2-MAX_WT DIV2 neuron #28_all_1x2	N2	Default	Primary	Default	21.051	90.759	31.114	19	143
C2-MAX_WT DIV2 neuron #28_all_1x2	N3	Default	Primary	Default	56.032	123.402	23.577	35	147
C2-MAX_WT DIV2 neuron #28_all_1x2	N4	Default	Primary	Default	8.488	66.768	28.455	23	137
C2-MAX_WT DIV2 neuron #28_all_1x2	N5	Default	Primary	Default	14.611	117.581	35.466	30	152
C2-MAX_WT DIV2 neuron #28_all_1x2	N6	Default	Primary	Default	18.737	74.893	37.399	14	133
640 Groups
Image	Cluster	Type	Count	Sum Len [micron]	Mean Len [micron]	SD Len [micron]	Min Len [micron]	Max Len [micron]	Mean Val [a.u.]	SD Val [a.u.]	Min Val [a.u.]	Max Val [a.u.]
C2-MAX_WT DIV2 neuron #28_all_1x2	All	All	6	133.843	22.307	17.067	8.488	56.032	100.802	38.462	3	152
Image 23
WT DIV2 neuron #30_all
Electroporation efficency by measuring GFP efficency with "Minimum" ROI (only covering soma)
		Label	Area	Mean	Min	Max	BX	BY	Width	Height	IntDen	RawIntDen
488	1	C1-MAX_WT DIV2 neuron #30_all_1x2.nd2:WT DIV2 neuron #30_all_1x2_...	66.809	161.788	127	255	25.467	79.467	24.133	15.467	10808.9	608001
640	2	C2-MAX_WT DIV2 neuron #30_all_1x2.nd2:WT DIV2 neuron #30_all_1x2_...	66.809	95.971	16	250	25.467	79.467	24.133	15.467	6411.73	360660
405	3	C3-MAX_WT DIV2 neuron #30_all_1x2.nd2:WT DIV2 neuron #30_all_1x2_...	66.809	44.673	3	123	25.467	79.467	24.133	15.467	2984.57	167882
640 Tracings
Image	Tracing	Cluster	Type	Label	Length [micron]	Mean Val [a.u.]	SD Val [a.u.]	Min Val [a.u.]	Max Val [a.u.]
C2-MAX_WT DIV2 neuron #30_all_1x2	N1	Default	Primary	Default	14.847	60.491	26.106	13	103
C2-MAX_WT DIV2 neuron #30_all_1x2	N2	Default	Primary	Default	10.862	69.746	17.479	35	104
C2-MAX_WT DIV2 neuron #30_all_1x2	N3	Default	Primary	Default	11.446	77.605	25.344	33	112
C2-MAX_WT DIV2 neuron #30_all_1x2	N4	Default	Primary	Default	97.522	98.922	31.338	28	151
640 Groups
Image	Cluster	Type	Count	Sum Len [micron]	Mean Len [micron]	SD Len [micron]	Min Len [micron]	Max Len [micron]	Mean Val [a.u.]	SD Val [a.u.]	Min Val [a.u.]	Max Val [a.u.]
C2-MAX_WT DIV2 neuron #30_all_1x2	All	All	4	134.678	33.67	42.605	10.862	97.522	90.166	32.658	13	151

## Sheet: V409I DIV2
V409 neuron prep_08.24.2020
* all .nd2 images were converted into an 8-bit grayscale .tiff in order to be analyzed in NeuronJ (imageJ plugin) *
Scale is set at 7.5µm/pixel
Image 1
VI DIV2 neuron #1_all
Electroporation efficency by measuring GFP efficency with "Minimum" ROI (only covering soma)
		Label	Area	Mean	Min	Max	BX	BY	Width	Height	IntDen	RawIntDen
488	1	C1-MAX_VI DIV2 neuron #1_all_2x1.nd2:VI DIV2 neuron #1_all_2x1_M...	108	148.597	96	255	54.8	138.667	29.067	45.6	16048.5	902726
640	2	C2-MAX_VI DIV2 neuron #1_all_2x1.nd2:VI DIV2 neuron #1_all_2x1_M...	108	112.001	11	189	54.8	138.667	29.067	45.6	12096.1	680408
405	3	C3-MAX_VI DIV2 neuron #1_all_2x1.nd2:VI DIV2 neuron #1_all_2x1_M...	108	36.801	5	157	54.8	138.667	29.067	45.6	3974.51	223566
640 Tracings
Image	Tracing	Cluster	Type	Label	Length [micron]	Mean Val [a.u.]	SD Val [a.u.]	Min Val [a.u.]	Max Val [a.u.]
C2-MAX_VI DIV2 neuron #1_all_2x1	N1	Default	Primary	Default	129.574	53.347	25.831	1	109
C2-MAX_VI DIV2 neuron #1_all_2x1	N2	Default	Primary	Default	27.523	106.395	3.374	100	111
C2-MAX_VI DIV2 neuron #1_all_2x1	N3	Default	Primary	Default	32.999	78.556	27.279	25	112
C2-MAX_VI DIV2 neuron #1_all_2x1	N4	Default	Primary	Default	25.262	98.778	20.697	19	110
640 Groups
Image	Cluster	Type	Count	Sum Len [micron]	Mean Len [micron]	SD Len [micron]	Min Len [micron]	Max Len [micron]	Mean Val [a.u.]	SD Val [a.u.]	Min Val [a.u.]	Max Val [a.u.]
C2-MAX_VI DIV2 neuron #1_all_2x1	All	All	4	215.358	53.839	50.594	25.262	129.574	69.736	31.802	1	112
Image 2
VI DIV2 neuron #3_all
Electroporation efficency by measuring GFP efficency with "Minimum" ROI (only covering soma)
		Label	Area	Mean	Min	Max	BX	BY	Width	Height	IntDen	RawIntDen
488	1	C1-MAX_VI DIV2 neuron #3_all_2x1.nd2:VI DIV2 neuron #3_all_2x1_M...	87.787	184.042	129	255	73.067	38.133	13.2	10.933	16156.4	908800
640	2	C2-MAX_VI DIV2 neuron #3_all_2x1.nd2:VI DIV2 neuron #3_all_2x1_M...	87.787	142.786	18	255	73.067	38.133	13.2	10.933	12534.7	705078
405	3	C3-MAX_VI DIV2 neuron #3_all_2x1.nd2:VI DIV2 neuron #3_all_2x1_M...	87.787	49.506	5	148	73.067	38.133	13.2	10.933	4345.96	244460
640 Tracings
Image	Tracing	Cluster	Type	Label	Length [micron]	Mean Val [a.u.]	SD Val [a.u.]	Min Val [a.u.]	Max Val [a.u.]
C2-MAX_VI DIV2 neuron #3_all_2x1	N1	Default	Primary	Default	12.56	105.099	40.526	15	145
C2-MAX_VI DIV2 neuron #3_all_2x1	N2	Default	Primary	Default	19.717	61.39	32.096	12	143
C2-MAX_VI DIV2 neuron #3_all_2x1	N3	Default	Primary	Default	14.181	87.781	44.304	8	143
C2-MAX_VI DIV2 neuron #3_all_2x1	N4	Default	Primary	Default	11.372	97.617	32.979	20	147
C2-MAX_VI DIV2 neuron #3_all_2x1	N5	Default	Primary	Default	67.252	49.011	19.323	13	148
C2-MAX_VI DIV2 neuron #3_all_2x1	N6	Default	Secondary	Default	7.189	15.37	8.174	4	40
640 Groups
Image	Cluster	Type	Count	Sum Len [micron]	Mean Len [micron]	SD Len [micron]	Min Len [micron]	Max Len [micron]	Mean Val [a.u.]	SD Val [a.u.]	Min Val [a.u.]	Max Val [a.u.]
C2-MAX_VI DIV2 neuron #3_all_2x1	All	All	6	132.271	22.045	22.519	7.189	67.252	62.698	36.69	4	148
Image 3
VI DIV2 neuron #6_all
Electroporation efficency by measuring GFP efficency with "Minimum" ROI (only covering soma)
		Label	Area	Mean	Min	Max	BX	BY	Width	Height	IntDen	RawIntDen
488	1	C1-MAX_VI DIV2 neuron #6_all_1x2.nd2:VI DIV2 neuron #6_all_1x2_M...	108.853	142.892	86	255	18.267	26.8	35.467	81.467	15554.3	874929
640	2	C2-MAX_VI DIV2 neuron #6_all_1x2.nd2:VI DIV2 neuron #6_all_1x2_M...	108.853	76.969	11	205	18.267	26.8	35.467	81.467	8378.29	471279
405	3	C3-MAX_VI DIV2 neuron #6_all_1x2.nd2:VI DIV2 neuron #6_all_1x2_M...	108.853	37.628	2	127	18.267	26.8	35.467	81.467	4095.95	230397
640 Tracings
Image	Tracing	Cluster	Type	Label	Length [micron]	Mean Val [a.u.]	SD Val [a.u.]	Min Val [a.u.]	Max Val [a.u.]
C2-MAX_VI DIV2 neuron #6_all_1x2	N1	Default	Primary	Default	8.321	17.784	7.106	4	35
C2-MAX_VI DIV2 neuron #6_all_1x2	N2	Default	Primary	Default	120.827	82.605	23.277	22	142
C2-MAX_VI DIV2 neuron #6_all_1x2	N3	Default	Primary	Default	16.711	53.116	19.339	15	98
C2-MAX_VI DIV2 neuron #6_all_1x2	N4	Default	Primary	Default	18.277	59.504	30.366	4	128
C2-MAX_VI DIV2 neuron #6_all_1x2	N5	Default	Secondary	Default	14.292	20.218	8.359	9	53
640 Groups
Image	Cluster	Type	Count	Sum Len [micron]	Mean Len [micron]	SD Len [micron]	Min Len [micron]	Max Len [micron]	Mean Val [a.u.]	SD Val [a.u.]	Min Val [a.u.]	Max Val [a.u.]
C2-MAX_VI DIV2 neuron #6_all_1x2	All	All	5	178.428	35.686	47.746	8.321	120.827	69.352	31.166	4	142
Image 4
VI DIV2 neuron #7_all
Electroporation efficency by measuring GFP efficency with "Minimum" ROI (only covering soma)
		Label	Area	Mean	Min	Max	BX	BY	Width	Height	IntDen	RawIntDen
488	1	C1-MAX_VI DIV2 neuron #7_all_2x1.nd2:VI DIV2 neuron #7_all_2x1_M...	95.2	124.745	89	255	23.2	20.933	81.733	27.467	11875.8	668011
640	2	C2-MAX_VI DIV2 neuron #7_all_2x1.nd2:VI DIV2 neuron #7_all_2x1_M...	95.2	43.413	4	117	23.2	20.933	81.733	27.467	4132.89	232475
405	3	C3-MAX_VI DIV2 neuron #7_all_2x1.nd2:VI DIV2 neuron #7_all_2x1_M...	95.2	42.711	2	173	23.2	20.933	81.733	27.467	4066.06	228716
640 Tracings
Image	Tracing	Cluster	Type	Label	Length [micron]	Mean Val [a.u.]	SD Val [a.u.]	Min Val [a.u.]	Max Val [a.u.]
C2-MAX_VI DIV2 neuron #7_all_2x1	N1	Default	Primary	Default	6.733	11.078	6.997	3	36
C2-MAX_VI DIV2 neuron #7_all_2x1	N2	Default	Primary	Default	59.707	23.317	7.2	7	45
C2-MAX_VI DIV2 neuron #7_all_2x1	N3	Default	Primary	Default	7.076	8.415	9	2	37
C2-MAX_VI DIV2 neuron #7_all_2x1	N4	Default	Primary	Default	9.205	10.179	3.664	4	19
C2-MAX_VI DIV2 neuron #7_all_2x1	N5	Default	Primary	Default	6.277	13.283	3.752	6	21
C2-MAX_VI DIV2 neuron #7_all_2x1	N6	Default	Primary	Default	12.806	15.67	7.762	3	33
640 Groups
Image	Cluster	Type	Count	Sum Len [micron]	Mean Len [micron]	SD Len [micron]	Min Len [micron]	Max Len [micron]	Mean Val [a.u.]	SD Val [a.u.]	Min Val [a.u.]	Max Val [a.u.]
C2-MAX_VI DIV2 neuron #7_all_2x1	All	All	6	101.803	16.967	21.077	6.277	59.707	18.854	8.976	2	45
Image 5
VI DIV2 neuron #8_all
Electroporation efficency by measuring GFP efficency with "Minimum" ROI (only covering soma)
		Label	Area	Mean	Min	Max	BX	BY	Width	Height	IntDen	RawIntDen
488	1	C1-MAX_VI DIV2 neuron #8_all_1x1.nd2:VI DIV2 neuron #8_all_1x1_M...	58.453	115.915	85	255	2.533	0.533	62.533	62.667	6775.63	381129
640	2	C2-MAX_VI DIV2 neuron #8_all_1x1.nd2:VI DIV2 neuron #8_all_1x1_M...	58.453	65.803	8	226	2.533	0.533	62.533	62.667	3846.38	216359
405	3	C3-MAX_VI DIV2 neuron #8_all_1x1.nd2:VI DIV2 neuron #8_all_1x1_M...	58.453	47.635	2	202	2.533	0.533	62.533	62.667	2784.43	156624
640 Tracings
Image	Tracing	Cluster	Type	Label	Length [micron]	Mean Val [a.u.]	SD Val [a.u.]	Min Val [a.u.]	Max Val [a.u.]
C2-MAX_VI DIV2 neuron #8_all_1x1	N1	Default	Primary	Default	7.406	14.018	6.493	5	31
C2-MAX_VI DIV2 neuron #8_all_1x1	N2	Default	Primary	Default	14.543	32.708	14.334	10	91
C2-MAX_VI DIV2 neuron #8_all_1x1	N3	Default	Primary	Default	9.485	19.07	8.806	7	43
C2-MAX_VI DIV2 neuron #8_all_1x1	N4	Default	Primary	Default	11.136	16.409	7.346	7	48
C2-MAX_VI DIV2 neuron #8_all_1x1	N5	Default	Primary	Default	49.921	44.225	20.159	10	143
640 Groups
Image	Cluster	Type	Count	Sum Len [micron]	Mean Len [micron]	SD Len [micron]	Min Len [micron]	Max Len [micron]	Mean Val [a.u.]	SD Val [a.u.]	Min Val [a.u.]	Max Val [a.u.]
C2-MAX_VI DIV2 neuron #8_all_1x1	All	All	5	92.492	18.498	17.759	7.406	49.921	33.615	20.365	5	143
Image 6
VI DIV2 neuron #9_all
Electroporation efficency by measuring GFP efficency with "Minimum" ROI (only covering soma)
		Label	Area	Mean	Min	Max	BX	BY	Width	Height	IntDen	RawIntDen
488	1	C1-MAX_VI DIV2 neuron #9_all_1x4.nd2:0902-0334	234.542	42.523	30	255	23.6	41.867	41.867	156.8	9973.53	561011
640	2	C2-MAX_VI DIV2 neuron #9_all_1x4.nd2:0902-0334	234.542	63.208	4	255	23.6	41.867	41.867	156.8	14825	833909
405	3	C3-MAX_VI DIV2 neuron #9_all_1x4.nd2:0902-0334	234.542	32.225	2	145	23.6	41.867	41.867	156.8	7558.1	425143
640 Tracings
Image	Tracing	Cluster	Type	Label	Length [micron]	Mean Val [a.u.]	SD Val [a.u.]	Min Val [a.u.]	Max Val [a.u.]
C2-MAX_VI DIV2 neuron #9_all_1x4	N1	Default	Primary	Default	221.265	62.003	22.548	6	145
C2-MAX_VI DIV2 neuron #9_all_1x4	N2	Default	Primary	Default	7.798	14.848	3.553	9	23
C2-MAX_VI DIV2 neuron #9_all_1x4	N3	Default	Primary	Default	18.006	39.683	9.114	24	79
C2-MAX_VI DIV2 neuron #9_all_1x4	N4	Default	Primary	Default	21.695	23.066	9.926	8	62
C2-MAX_VI DIV2 neuron #9_all_1x4	N5	Default	Primary	Default	9.306	28.887	7.046	17	55
C2-MAX_VI DIV2 neuron #9_all_1x4	N6	Default	Primary	Default	8.61	16.232	8.133	4	32
C2-MAX_VI DIV2 neuron #9_all_1x4	N7	Default	Secondary	Default	9.07	18.712	9.407	2	34
C2-MAX_VI DIV2 neuron #9_all_1x4	N8	Default	Secondary	Default	16.559	12.672	5.217	5	27
640 Groups
Image	Cluster	Type	Count	Sum Len [micron]	Mean Len [micron]	SD Len [micron]	Min Len [micron]	Max Len [micron]	Mean Val [a.u.]	SD Val [a.u.]	Min Val [a.u.]	Max Val [a.u.]
C2-MAX_VI DIV2 neuron #9_all_1x4	All	All	8	312.311	39.039	73.813	7.798	221.265	50.833	26.687	2	145
Image 7
VI DIV2 neuron #10_all
Electroporation efficency by measuring GFP efficency with "Minimum" ROI (only covering soma)
		Label	Area	Mean	Min	Max	BX	BY	Width	Height	IntDen	RawIntDen
488	1	C1-MAX_VI DIV2 neuron #10_all_1x2.nd2:VI DIV2 neuron #10_all_1x2_...	67.164	145.478	106	255	9.733	33.067	31.6	73.867	9770.92	549614
640	2	C2-MAX_VI DIV2 neuron #10_all_1x2.nd2:VI DIV2 neuron #10_all_1x2_...	67.164	92.025	6	255	9.733	33.067	31.6	73.867	6180.84	347672
405	3	C3-MAX_VI DIV2 neuron #10_all_1x2.nd2:VI DIV2 neuron #10_all_1x2_...	67.164	61.058	3	165	9.733	33.067	31.6	73.867	4100.91	230676
640 Tracings
Image	Tracing	Cluster	Type	Label	Length [micron]	Mean Val [a.u.]	SD Val [a.u.]	Min Val [a.u.]	Max Val [a.u.]
C2-MAX_VI DIV2 neuron #10_all_1x2	N1	Default	Primary	Default	19.562	43.338	14.525	17	80
C2-MAX_VI DIV2 neuron #10_all_1x2	N2	Default	Primary	Default	63.348	60.612	16.709	11	101
C2-MAX_VI DIV2 neuron #10_all_1x2	N3	Default	Primary	Default	8.319	23.984	10.288	10	50
C2-MAX_VI DIV2 neuron #10_all_1x2	N4	Default	Primary	Default	24.278	48.64	20.284	14	88
640 Groups
Image	Cluster	Type	Count	Sum Len [micron]	Mean Len [micron]	SD Len [micron]	Min Len [micron]	Max Len [micron]	Mean Val [a.u.]	SD Val [a.u.]	Min Val [a.u.]	Max Val [a.u.]
C2-MAX_VI DIV2 neuron #10_all_1x2	All	All	4	115.507	28.877	23.936	8.319	63.348	52.463	19.898	10	101
Image 8
VI DIV2 neuron #12_all
Electroporation efficency by measuring GFP efficency with "Minimum" ROI (only covering soma)
		Label	Area	Mean	Min	Max	BX	BY	Width	Height	IntDen	RawIntDen
488	1	C1-MAX_VI DIV2 neuron #12_all_2x3.nd2:VI DIV2 neuron #12_all_2x3_...	71.556	174.054	129	255	28.533	140.8	10.667	10	12454.5	700566
640	2	C2-MAX_VI DIV2 neuron #12_all_2x3.nd2:VI DIV2 neuron #12_all_2x3_...	71.556	252.631	120	255	28.533	140.8	10.667	10	18077.2	1016840
405	3	C3-MAX_VI DIV2 neuron #12_all_2x3.nd2:VI DIV2 neuron #12_all_2x3_...	71.556	53.064	4	129	28.533	140.8	10.667	10	3797.05	213584
640 Tracings
Image	Tracing	Cluster	Type	Label	Length [micron]	Mean Val [a.u.]	SD Val [a.u.]	Min Val [a.u.]	Max Val [a.u.]
C2-MAX_VI DIV2 neuron #12_all_2x3	N1	Default	Primary	Default	131.211	149.375	17.81	8	153
C2-MAX_VI DIV2 neuron #12_all_2x3	N2	Default	Primary	Default	9.98	137.5	32.392	34	153
C2-MAX_VI DIV2 neuron #12_all_2x3	N3	Default	Primary	Default	8.897	152.69	2.018	137	153
C2-MAX_VI DIV2 neuron #12_all_2x3	N4	Default	Primary	Default	9.949	149.342	11.9	93	153
C2-MAX_VI DIV2 neuron #12_all_2x3	N5	Default	Secondary	Default	7.177	117.49	30.03	70	153
C2-MAX_VI DIV2 neuron #12_all_2x3	N6	Default	Secondary	Default	12.596	152.151	5.767	104	153
640 Groups
Image	Cluster	Type	Count	Sum Len [micron]	Mean Len [micron]	SD Len [micron]	Min Len [micron]	Max Len [micron]	Mean Val [a.u.]	SD Val [a.u.]	Min Val [a.u.]	Max Val [a.u.]
C2-MAX_VI DIV2 neuron #12_all_2x3	All	All	6	179.81	29.968	49.63	7.177	131.211	147.744	19.592	8	153
Image 9
VI DIV2 neuron #14_all (z 1-13)
Electroporation efficency by measuring GFP efficency with "Minimum" ROI (only covering soma)
		Label	Area	Mean	Min	Max	BX	BY	Width	Height	IntDen	RawIntDen
488	1	C1-MAX_VI DIV2 neuron #14_all_1x2.nd2:VA DIV2 neuron #14_all_1x1_...	46.702	99.571	46	255	8.267	4.533	52.8	110.267	4650.2	261574
640	2	C2-MAX_VI DIV2 neuron #14_all_1x2.nd2:VA DIV2 neuron #14_all_1x1_...	46.702	98.537	3	255	8.267	4.533	52.8	110.267	4601.92	258858
405	3	C3-MAX_VI DIV2 neuron #14_all_1x2.nd2:VA DIV2 neuron #14_all_1x1_...	46.702	44.607	3	128	8.267	4.533	52.8	110.267	2083.24	117182
640 Tracings
Image	Tracing	Cluster	Type	Label	Length [micron]	Mean Val [a.u.]	SD Val [a.u.]	Min Val [a.u.]	Max Val [a.u.]
C2-MAX_VI DIV2 neuron #14_all_1x2	N1	Default	Primary	Default	17.682	8.653	4.356	2	22
C2-MAX_VI DIV2 neuron #14_all_1x2	N2	Default	Primary	Default	10.745	10.132	4.518	1	20
C2-MAX_VI DIV2 neuron #14_all_1x2	N3	Default	Primary	Default	70.885	38.956	11.523	6	67
C2-MAX_VI DIV2 neuron #14_all_1x2	N4	Default	Primary	Default	13.803	7.74	2.989	4	16
C2-MAX_VI DIV2 neuron #14_all_1x2	N5	Default	Secondary	Default	11.736	20.746	9.063	5	55
640 Groups
Image	Cluster	Type	Count	Sum Len [micron]	Mean Len [micron]	SD Len [micron]	Min Len [micron]	Max Len [micron]	Mean Val [a.u.]	SD Val [a.u.]	Min Val [a.u.]	Max Val [a.u.]
C2-MAX_VI DIV2 neuron #14_all_1x2	All	All	5	124.851	24.97	25.805	10.745	70.885	27.157	16.983	1	67
Image 10
VI DIV2 neuron #15_all (z 2-9)
Electroporation efficency by measuring GFP efficency with "Minimum" ROI (only covering soma)
		Label	Area	Mean	Min	Max	BX	BY	Width	Height	IntDen	RawIntDen
488	1	C1-MAX_VI DIV2 neuron #15_all_2x2.nd2:VI DIV2 neuron #15_all_2x2_Yen	173.778	65.119	43	173	0.133	5.067	125.733	112.533	11316.2	636539
640	2	C2-MAX_VI DIV2 neuron #15_all_2x2.nd2:VI DIV2 neuron #15_all_2x2_Yen	173.778	66.806	4	255	0.133	5.067	125.733	112.533	11609.5	653033
405	3	C3-MAX_VI DIV2 neuron #15_all_2x2.nd2:VI DIV2 neuron #15_all_2x2_Yen	173.778	15.131	2	84	0.133	5.067	125.733	112.533	2629.4	147904
640 Tracings
Image	Tracing	Cluster	Type	Label	Length [micron]	Mean Val [a.u.]	SD Val [a.u.]	Min Val [a.u.]	Max Val [a.u.]
C2-MAX_VI DIV2 neuron #15_all_2x2	N1	Default	Primary	Default	142.054	81.916	20.787	39	137
C2-MAX_VI DIV2 neuron #15_all_2x2	N2	Default	Primary	Default	13.487	54.45	25.595	8	101
C2-MAX_VI DIV2 neuron #15_all_2x2	N3	Default	Primary	Default	10.359	43.875	22.31	10	78
C2-MAX_VI DIV2 neuron #15_all_2x2	N4	Default	Primary	Default	7.569	27.8	11.104	14	42
C2-MAX_VI DIV2 neuron #15_all_2x2	N5	Default	Secondary	Default	28.491	55.375	23.565	15	115
640 Groups
Image	Cluster	Type	Count	Sum Len [micron]	Mean Len [micron]	SD Len [micron]	Min Len [micron]	Max Len [micron]	Mean Val [a.u.]	SD Val [a.u.]	Min Val [a.u.]	Max Val [a.u.]
C2-MAX_VI DIV2 neuron #15_all_2x2	All	All	5	201.961	40.392	57.402	7.569	142.054	71.913	26.453	8	137
Image 11
VI DIV2 neuron #16_all
Electroporation efficency by measuring GFP efficency with "Minimum" ROI (only covering soma)
		Label	Area	Mean	Min	Max	BX	BY	Width	Height	IntDen	RawIntDen
488	1	C1-MAX_VI DIV2 neuron #16_all_1x2.nd2:VI DIV2 neuron #16_all_1x2_...	75.04	145.317	116	255	4.933	33.067	63.333	65.467	10904.6	613381
640	2	C2-MAX_VI DIV2 neuron #16_all_1x2.nd2:VI DIV2 neuron #16_all_1x2_...	75.04	81.309	12	187	4.933	33.067	63.333	65.467	6101.44	343206
405	3	C3-MAX_VI DIV2 neuron #16_all_1x2.nd2:VI DIV2 neuron #16_all_1x2_...	75.04	44.162	3	151	4.933	33.067	63.333	65.467	3313.92	186408
640 Tracings
Image	Tracing	Cluster	Type	Label	Length [micron]	Mean Val [a.u.]	SD Val [a.u.]	Min Val [a.u.]	Max Val [a.u.]
C2-MAX_VI DIV2 neuron #16_all_1x2	N1	Default	Primary	Default	17.231	45.638	20.052	9	85
C2-MAX_VI DIV2 neuron #16_all_1x2	N2	Default	Primary	Default	5.455	13	5.329	6	25
C2-MAX_VI DIV2 neuron #16_all_1x2	N3	Default	Primary	Default	70.06	78.763	25.891	11	139
C2-MAX_VI DIV2 neuron #16_all_1x2	N4	Default	Primary	Default	17.706	54.897	22.965	13	106
C2-MAX_VI DIV2 neuron #16_all_1x2	N5	Default	Primary	Default	25.234	46.474	16.355	13	89
C2-MAX_VI DIV2 neuron #16_all_1x2	N6	Default	Primary	Default	19.627	29.95	14.084	7	68
640 Groups
Image	Cluster	Type	Count	Sum Len [micron]	Mean Len [micron]	SD Len [micron]	Min Len [micron]	Max Len [micron]	Mean Val [a.u.]	SD Val [a.u.]	Min Val [a.u.]	Max Val [a.u.]
C2-MAX_VI DIV2 neuron #16_all_1x2	All	All	6	155.313	25.885	22.584	5.455	70.06	58.023	29.603	6	139
Image 12
VI DIV2 neuron #17_all
Electroporation efficency by measuring GFP efficency with "Minimum" ROI (only covering soma)
		Label	Area	Mean	Min	Max	BX	BY	Width	Height	IntDen	RawIntDen
488	1	C1-MAX_VI DIV2 neuron #17_all_2x2.nd2:VI DIV2 neuron #17_all_2x2_...	67.733	152.692	113	255	39.467	28.267	66.133	82	10342.3	581756
640	2	C2-MAX_VI DIV2 neuron #17_all_2x2.nd2:VI DIV2 neuron #17_all_2x2_...	67.733	84.887	11	240	39.467	28.267	66.133	82	5749.71	323421
405	3	C3-MAX_VI DIV2 neuron #17_all_2x2.nd2:VI DIV2 neuron #17_all_2x2_...	67.733	43.129	3	105	39.467	28.267	66.133	82	2921.24	164320
640 Tracings
Image	Tracing	Cluster	Type	Label	Length [micron]	Mean Val [a.u.]	SD Val [a.u.]	Min Val [a.u.]	Max Val [a.u.]
C2-MAX_VI DIV2 neuron #17_all_2x2	N1	Default	Primary	Default	9.243	13.732	8.68	1	27
C2-MAX_VI DIV2 neuron #17_all_2x2	N2	Default	Primary	Default	80.574	60.938	39.032	10	145
C2-MAX_VI DIV2 neuron #17_all_2x2	N3	Default	Primary	Default	22.371	41.269	19.277	4	89
C2-MAX_VI DIV2 neuron #17_all_2x2	N4	Default	Primary	Default	7.677	14.033	4.764	6	23
C2-MAX_VI DIV2 neuron #17_all_2x2	N5	Default	Primary	Default	27.287	37.881	23.916	2	93
C2-MAX_VI DIV2 neuron #17_all_2x2	N6	Default	Secondary	Default	16.811	30.331	16.98	5	73
640 Groups
Image	Cluster	Type	Count	Sum Len [micron]	Mean Len [micron]	SD Len [micron]	Min Len [micron]	Max Len [micron]	Mean Val [a.u.]	SD Val [a.u.]	Min Val [a.u.]	Max Val [a.u.]
C2-MAX_VI DIV2 neuron #17_all_2x2	All	All	6	163.963	27.327	27.143	7.677	80.574	45.869	34.334	1	145
Image 13
VI DIV2 neuron #18_all
Electroporation efficency by measuring GFP efficency with "Minimum" ROI (only covering soma)
		Label	Area	Mean	Min	Max	BX	BY	Width	Height	IntDen	RawIntDen
488	1	C1-MAX_VI DIV2 neuron #18_all_2x1.nd2:VI DIV2 neuron #18_all_2x1_...	70.756	155.771	107	255	94.8	15.067	10.133	14.8	11021.6	619967
640	2	C2-MAX_VI DIV2 neuron #18_all_2x1.nd2:VI DIV2 neuron #18_all_2x1_...	70.756	103.788	12	250	94.8	15.067	10.133	14.8	7343.56	413075
405	3	C3-MAX_VI DIV2 neuron #18_all_2x1.nd2:VI DIV2 neuron #18_all_2x1_...	70.756	48.673	3	132	94.8	15.067	10.133	14.8	3443.86	193717
640 Tracings
Image	Tracing	Cluster	Type	Label	Length [micron]	Mean Val [a.u.]	SD Val [a.u.]	Min Val [a.u.]	Max Val [a.u.]
C2-MAX_VI DIV2 neuron #18_all_2x1	N1	Default	Primary	Default	5.897	29.152	6.352	14	43
C2-MAX_VI DIV2 neuron #18_all_2x1	N2	Default	Primary	Default	13.866	58.22	22.028	17	93
C2-MAX_VI DIV2 neuron #18_all_2x1	N3	Default	Primary	Default	4.311	32	15.577	11	85
C2-MAX_VI DIV2 neuron #18_all_2x1	N4	Default	Primary	Default	7.378	44.565	18.858	14	82
C2-MAX_VI DIV2 neuron #18_all_2x1	N5	Default	Primary	Default	7.732	66.429	20.068	34	127
C2-MAX_VI DIV2 neuron #18_all_2x1	N6	Default	Primary	Default	86.499	127.228	26.753	23	148
C2-MAX_VI DIV2 neuron #18_all_2x1	N7	Default	Primary	Default	11.355	33.053	10.404	10	55
C2-MAX_VI DIV2 neuron #18_all_2x1	N8	Default	Primary	Default	15.844	39.528	25.668	5	88
C2-MAX_VI DIV2 neuron #18_all_2x1	N9	Default	Secondary	Default	17.402	78.389	29.601	33	143
C2-MAX_VI DIV2 neuron #18_all_2x1	N10	Default	Secondary	Default	4.554	28.258	9.07	11	44
C2-MAX_VI DIV2 neuron #18_all_2x1	N11	Default	Tertiary	Default	29.438	40.984	38.745	5	146
640 Groups
Image	Cluster	Type	Count	Sum Len [micron]	Mean Len [micron]	SD Len [micron]	Min Len [micron]	Max Len [micron]	Mean Val [a.u.]	SD Val [a.u.]	Min Val [a.u.]	Max Val [a.u.]
C2-MAX_VI DIV2 neuron #18_all_2x1	All	All	11	204.278	18.571	23.704	4.311	86.499	82.357	48.827	5	148
Image 14
VI DIV2 neuron #20_all
Electroporation efficency by measuring GFP efficency with "Minimum" ROI (only covering soma)
		Label	Area	Mean	Min	Max	BX	BY	Width	Height	IntDen	RawIntDen
488	1	C1-MAX_VI DIV2 neuron #20_all_1x1.nd2:VI DIV2 neuron #20_all_1x1_...	76.356	17.917	12	255	38.267	31.867	28.533	20.133	1368.04	76952
640	2	C2-MAX_VI DIV2 neuron #20_all_1x1.nd2:VI DIV2 neuron #20_all_1x1_...	76.356	79.158	1	251	38.267	31.867	28.533	20.133	6044.14	339983
405	3	C3-MAX_VI DIV2 neuron #20_all_1x1.nd2:VI DIV2 neuron #20_all_1x1_...	76.356	47.817	2	139	38.267	31.867	28.533	20.133	3651.09	205374
640 Tracings
Image	Tracing	Cluster	Type	Label	Length [micron]	Mean Val [a.u.]	SD Val [a.u.]	Min Val [a.u.]	Max Val [a.u.]
C2-MAX_VI DIV2 neuron #20_all_1x1	N1	Default	Primary	Default	6.834	35.392	7.122	21	47
C2-MAX_VI DIV2 neuron #20_all_1x1	N2	Default	Primary	Default	12.508	28.729	14.796	1	52
C2-MAX_VI DIV2 neuron #20_all_1x1	N3	Default	Primary	Default	11.381	22.212	12.133	5	54
C2-MAX_VI DIV2 neuron #20_all_1x1	N4	Default	Primary	Default	11.619	26.802	7.076	16	42
C2-MAX_VI DIV2 neuron #20_all_1x1	N5	Default	Primary	Default	3.962	13.581	5.59	5	23
C2-MAX_VI DIV2 neuron #20_all_1x1	N6	Default	Primary	Default	5.88	32.13	5.365	20	43
C2-MAX_VI DIV2 neuron #20_all_1x1	N7	Default	Primary	Default	40.12	81.543	36.564	7	153
C2-MAX_VI DIV2 neuron #20_all_1x1	N8	Default	Secondary	Default	8.871	28.775	9.271	13	45
C2-MAX_VI DIV2 neuron #20_all_1x1	N9	Default	Secondary	Default	17.95	19.943	13.526	4	91
640 Groups
Image	Cluster	Type	Count	Sum Len [micron]	Mean Len [micron]	SD Len [micron]	Min Len [micron]	Max Len [micron]	Mean Val [a.u.]	SD Val [a.u.]	Min Val [a.u.]	Max Val [a.u.]
C2-MAX_VI DIV2 neuron #20_all_1x1	All	All	9	119.126	13.236	10.907	3.962	40.12	44.4	34.972	1	153
Image 15
VI DIV2 neuron #21_all
Electroporation efficency by measuring GFP efficency with "Minimum" ROI (only covering soma)
		Label	Area	Mean	Min	Max	BX	BY	Width	Height	IntDen	RawIntDen
488	1	C1-MAX_VI DIV2 neuron #21_all_1x3.nd2:VI DIV2 neuron #21_all_1x3_...	87.022	144.894	103	255	30.533	36	26.933	129.067	12609	709255
640	2	C2-MAX_VI DIV2 neuron #21_all_1x3.nd2:VI DIV2 neuron #21_all_1x3_...	87.022	75.914	3	251	30.533	36	26.933	129.067	6606.22	371600
405	3	C3-MAX_VI DIV2 neuron #21_all_1x3.nd2:VI DIV2 neuron #21_all_1x3_...	87.022	45.508	3	116	30.533	36	26.933	129.067	3960.2	222761
640 Tracings
Image	Tracing	Cluster	Type	Label	Length [micron]	Mean Val [a.u.]	SD Val [a.u.]	Min Val [a.u.]	Max Val [a.u.]
C2-MAX_VI DIV2 neuron #21_all_1x3	N1	Default	Primary	Default	8.131	17.934	4.881	6	28
C2-MAX_VI DIV2 neuron #21_all_1x3	N2	Default	Primary	Default	12.142	41.506	18.553	3	78
C2-MAX_VI DIV2 neuron #21_all_1x3	N3	Default	Primary	Default	14.786	44.535	19.429	14	84
C2-MAX_VI DIV2 neuron #21_all_1x3	N4	Default	Primary	Default	16.655	56.095	17.892	10	85
C2-MAX_VI DIV2 neuron #21_all_1x3	N5	Default	Primary	Default	9.235	58.788	28.318	18	104
C2-MAX_VI DIV2 neuron #21_all_1x3	N6	Default	Primary	Default	164.682	93.824	26.635	7	151
C2-MAX_VI DIV2 neuron #21_all_1x3	N7	Default	Secondary	Default	3.31	20.808	13.862	3	42
C2-MAX_VI DIV2 neuron #21_all_1x3	N8	Default	Secondary	Default	9.402	56.789	26.512	1	91
640 Groups
Image	Cluster	Type	Count	Sum Len [micron]	Mean Len [micron]	SD Len [micron]	Min Len [micron]	Max Len [micron]	Mean Val [a.u.]	SD Val [a.u.]	Min Val [a.u.]	Max Val [a.u.]
C2-MAX_VI DIV2 neuron #21_all_1x3	All	All	8	238.342	29.793	54.659	3.31	164.682	78.262	34.303	1	151
Image 16
VI DIV2 neuron #22_all
Electroporation efficency by measuring GFP efficency with "Minimum" ROI (only covering soma)
		Label	Area	Mean	Min	Max	BX	BY	Width	Height	IntDen	RawIntDen
488	1	C1-MAX_VI DIV2 neuron #22_all_1x3.nd2:VI DIV2 neuron #22_all_1x3_...	105.636	148.931	100	255	10.533	83.6	22.933	78.133	15732.4	884949
640	2	C2-MAX_VI DIV2 neuron #22_all_1x3.nd2:VI DIV2 neuron #22_all_1x3_...	105.636	71.704	2	218	10.533	83.6	22.933	78.133	7574.54	426068
405	3	C3-MAX_VI DIV2 neuron #22_all_1x3.nd2:VI DIV2 neuron #22_all_1x3_...	105.636	38.7	3	162	10.533	83.6	22.933	78.133	4088.14	229958
640 Tracings
Image	Tracing	Cluster	Type	Label	Length [micron]	Mean Val [a.u.]	SD Val [a.u.]	Min Val [a.u.]	Max Val [a.u.]
C2-MAX_VI DIV2 neuron #22_all_1x3	N1	Default	Primary	Default	157.967	88.346	25.054	14	153
C2-MAX_VI DIV2 neuron #22_all_1x3	N2	Default	Primary	Default	12.503	16.802	12.317	2	47
C2-MAX_VI DIV2 neuron #22_all_1x3	N3	Default	Primary	Default	31.984	56.23	21.039	5	100
C2-MAX_VI DIV2 neuron #22_all_1x3	N4	Default	Primary	Default	12.918	39.58	16.808	5	79
C2-MAX_VI DIV2 neuron #22_all_1x3	N5	Default	Primary	Default	11.948	28.155	13.754	3	53
C2-MAX_VI DIV2 neuron #22_all_1x3	N6	Default	Secondary	Default	15.649	33.292	17.347	7	74
640 Groups
Image	Cluster	Type	Count	Sum Len [micron]	Mean Len [micron]	SD Len [micron]	Min Len [micron]	Max Len [micron]	Mean Val [a.u.]	SD Val [a.u.]	Min Val [a.u.]	Max Val [a.u.]
C2-MAX_VI DIV2 neuron #22_all_1x3	All	All	6	242.97	40.495	58.049	11.948	157.967	71.991	33.37	2	153
Image 17
VI DIV2 neuron #27_all
Electroporation efficency by measuring GFP efficency with "Minimum" ROI (only covering soma)
		Label	Area	Mean	Min	Max	BX	BY	Width	Height	IntDen	RawIntDen
488	1	C1-MAX_VI DIV2 neuron #27_all_1x1.nd2:VI DIV2 neuron #27_all_1x1_...	199.911	121.582	83	255	8.667	0.667	52.133	47.2	24305.6	1367191
640	2	C2-MAX_VI DIV2 neuron #27_all_1x1.nd2:VI DIV2 neuron #27_all_1x1_...	199.911	38.921	3	242	8.667	0.667	52.133	47.2	7780.78	437669
405	3	C3-MAX_VI DIV2 neuron #27_all_1x1.nd2:VI DIV2 neuron #27_all_1x1_...	199.911	42.597	2	150	8.667	0.667	52.133	47.2	8515.64	479005
640 Tracings
Image	Tracing	Cluster	Type	Label	Length [micron]	Mean Val [a.u.]	SD Val [a.u.]	Min Val [a.u.]	Max Val [a.u.]
C2-MAX_VI DIV2 neuron #27_all_1x1	N1	Default	Primary	Default	8.757	19.53	6.349	8	33
C2-MAX_VI DIV2 neuron #27_all_1x1	N2	Default	Primary	Default	15.118	39.613	13.418	11	65
C2-MAX_VI DIV2 neuron #27_all_1x1	N3	Default	Primary	Default	12.577	28.963	10.366	8	50
C2-MAX_VI DIV2 neuron #27_all_1x1	N4	Default	Primary	Default	62.965	83.142	31.93	9	153
C2-MAX_VI DIV2 neuron #27_all_1x1	N5	Default	Primary	Default	5.001	13.25	3.916	5	19
C2-MAX_VI DIV2 neuron #27_all_1x1	N6	Default	Primary	Default	6.375	11.13	5.302	3	31
C2-MAX_VI DIV2 neuron #27_all_1x1	N7	Default	Primary	Default	6.621	9.634	3.337	4	16
640 Groups
Image	Cluster	Type	Count	Sum Len [micron]	Mean Len [micron]	SD Len [micron]	Min Len [micron]	Max Len [micron]	Mean Val [a.u.]	SD Val [a.u.]	Min Val [a.u.]	Max Val [a.u.]
C2-MAX_VI DIV2 neuron #27_all_1x1	All	All	7	117.413	16.773	20.688	5.001	62.965	55.895	38.687	3	153
Image 18
VI DIV2 neuron #28_all
Electroporation efficency by measuring GFP efficency with "Minimum" ROI (only covering soma)
		Label	Area	Mean	Min	Max	BX	BY	Width	Height	IntDen	RawIntDen
488	1	C1-MAX_VI DIV2 neuron #28_all_2x2.nd2:VI DIV2 neuron #28_all_2x2_...	59.982	151.394	92	255	9.867	7.333	73.867	37.2	9080.92	510802
640	2	C2-MAX_VI DIV2 neuron #28_all_2x2.nd2:VI DIV2 neuron #28_all_2x2_...	59.982	97.432	13	255	9.867	7.333	73.867	37.2	5844.16	328734
405	3	C3-MAX_VI DIV2 neuron #28_all_2x2.nd2:VI DIV2 neuron #28_all_2x2_...	59.982	50.4	3	142	9.867	7.333	73.867	37.2	3023.13	170051
640 Tracings
Image	Tracing	Cluster	Type	Label	Length [micron]	Mean Val [a.u.]	SD Val [a.u.]	Min Val [a.u.]	Max Val [a.u.]
C2-MAX_VI DIV2 neuron #28_all_2x2	N1	Default	Primary	Default	12.924	42.74	17.21	7	72
C2-MAX_VI DIV2 neuron #28_all_2x2	N2	Default	Primary	Default	14.908	31.531	14.049	5	63
C2-MAX_VI DIV2 neuron #28_all_2x2	N3	Default	Primary	Default	22.563	48.168	22.008	6	85
C2-MAX_VI DIV2 neuron #28_all_2x2	N4	Default	Primary	Default	22.135	75.5	21.599	17	113
C2-MAX_VI DIV2 neuron #28_all_2x2	N5	Default	Primary	Default	91.158	40.789	18.467	11	119
640 Groups
Image	Cluster	Type	Count	Sum Len [micron]	Mean Len [micron]	SD Len [micron]	Min Len [micron]	Max Len [micron]	Mean Val [a.u.]	SD Val [a.u.]	Min Val [a.u.]	Max Val [a.u.]
C2-MAX_VI DIV2 neuron #28_all_2x2	All	All	5	163.689	32.738	32.937	12.924	91.158	45.544	22.425	5	119
Image 19
VI DIV2 neuron #29_all (z 4-13)
Electroporation efficency by measuring GFP efficency with "Minimum" ROI (only covering soma)
		Label	Area	Mean	Min	Max	BX	BY	Width	Height	IntDen	RawIntDen
488	1	C1-MAX_VI DIV2 neuron #29_all_1x3.nd2:VI DIV2 neuron #29_all_1x3_...	81.173	159.345	104	241	16.933	80.267	30.933	65.467	12934.6	727571
640	2	C2-MAX_VI DIV2 neuron #29_all_1x3.nd2:VI DIV2 neuron #29_all_1x3_...	81.173	102.521	13	243	16.933	80.267	30.933	65.467	8321.97	468111
405	3	C3-MAX_VI DIV2 neuron #29_all_1x3.nd2:VI DIV2 neuron #29_all_1x3_...	81.173	43.353	3	112	16.933	80.267	30.933	65.467	3519.11	197950
640 Tracings
Image	Tracing	Cluster	Type	Label	Length [micron]	Mean Val [a.u.]	SD Val [a.u.]	Min Val [a.u.]	Max Val [a.u.]
C2-MAX_VI DIV2 neuron #29_all_1x3	N1	Default	Primary	Default	116.331	127.899	19.95	40	151
C2-MAX_VI DIV2 neuron #29_all_1x3	N2	Default	Primary	Default	16.579	81.975	32.831	17	140
C2-MAX_VI DIV2 neuron #29_all_1x3	N3	Default	Primary	Default	13.181	111.139	36.091	25	142
C2-MAX_VI DIV2 neuron #29_all_1x3	N4	Default	Secondary	Default	5.194	37	15.211	8	66
640 Groups
Image	Cluster	Type	Count	Sum Len [micron]	Mean Len [micron]	SD Len [micron]	Min Len [micron]	Max Len [micron]	Mean Val [a.u.]	SD Val [a.u.]	Min Val [a.u.]	Max Val [a.u.]
C2-MAX_VI DIV2 neuron #29_all_1x3	All	All	4	151.286	37.821	52.557	5.194	116.331	117.917	31.729	8	151
Image 20
VI DIV2 neuron #31_all
Electroporation efficency by measuring GFP efficency with "Minimum" ROI (only covering soma)
		Label	Area	Mean	Min	Max	BX	BY	Width	Height	IntDen	RawIntDen
488	1	C1-MAX_VI DIV2 neuron #31_all_3x1.nd2:VI DIV2 neuron #31_all_3x1_...	91.822	158.764	108	255	123.2	27.067	22.267	12.933	14578.1	820018
640	2	C2-MAX_VI DIV2 neuron #31_all_3x1.nd2:VI DIV2 neuron #31_all_3x1_...	91.822	67.125	8	254	123.2	27.067	22.267	12.933	6163.57	346701
405	3	C3-MAX_VI DIV2 neuron #31_all_3x1.nd2:VI DIV2 neuron #31_all_3x1_...	91.822	38.675	3	106	123.2	27.067	22.267	12.933	3551.24	199757
640 Tracings
Image	Tracing	Cluster	Type	Label	Length [micron]	Mean Val [a.u.]	SD Val [a.u.]	Min Val [a.u.]	Max Val [a.u.]
C2-MAX_VI DIV2 neuron #31_all_3x1	N1	Default	Primary	Default	13.938	58.981	19.412	16	94
C2-MAX_VI DIV2 neuron #31_all_3x1	N2	Default	Primary	Default	14.941	30.344	9.844	13	56
C2-MAX_VI DIV2 neuron #31_all_3x1	N3	Default	Primary	Default	10.472	12.014	6.756	2	37
C2-MAX_VI DIV2 neuron #31_all_3x1	N4	Default	Primary	Default	228.161	87.465	21.907	25	152
C2-MAX_VI DIV2 neuron #31_all_3x1	N5	Default	Primary	Default	13.931	36.242	12.133	6	78
C2-MAX_VI DIV2 neuron #31_all_3x1	N6	Default	Secondary	Default	7.516	39.554	6.993	17	52
C2-MAX_VI DIV2 neuron #31_all_3x1	N7	Default	Secondary	Default	10.856	18.481	4.948	9	32
C2-MAX_VI DIV2 neuron #31_all_3x1	N8	Default	Secondary	Default	33.756	27.965	12.703	8	83
C2-MAX_VI DIV2 neuron #31_all_3x1	N9	Default	Secondary	Default	18.727	27.81	13.257	5	62
C2-MAX_VI DIV2 neuron #31_all_3x1	N10	Default	Secondary	Default	11.72	31.716	16.094	3	100
640 Groups
Image	Cluster	Type	Count	Sum Len [micron]	Mean Len [micron]	SD Len [micron]	Min Len [micron]	Max Len [micron]	Mean Val [a.u.]	SD Val [a.u.]	Min Val [a.u.]	Max Val [a.u.]
C2-MAX_VI DIV2 neuron #31_all_3x1	All	All	10	364.018	36.402	67.766	7.516	228.161	66.388	33.877	2	152

## Sheet: V409A DIV2
V409 neuron prep_08.24.2020
* all .nd2 images were converted into an 8-bit grayscale .tiff in order to be analyzed in NeuronJ (imageJ plugin) *
Scale is set at 7.5µm/pixel
Image 1
VA DIV2 neuron #2_all
Electroporation efficency by measuring GFP efficency with "Minimum" ROI (only covering soma)
		Label	Area	Mean	Min	Max	BX	BY	Width	Height	IntDen	RawIntDen
488	1	C1-MAX_VA DIV2 neuron #2_all_1x2.nd2:VA DIV2 neuron #2_all_1x2_M...	56.782	152.827	104	255	34.933	56.4	33.333	43.867	8677.83	488128
640	2	C2-MAX_VA DIV2 neuron #2_all_1x2.nd2:VA DIV2 neuron #2_all_1x2_M...	56.782	88.706	13	255	34.933	56.4	33.333	43.867	5036.94	283328
405	3	C3-MAX_VA DIV2 neuron #2_all_1x2.nd2:VA DIV2 neuron #2_all_1x2_M...	56.782	59.14	3	124	34.933	56.4	33.333	43.867	3358.12	188894
640 Tracings
Image	Tracing	Cluster	Type	Label	Length [micron]	Mean Val [a.u.]	SD Val [a.u.]	Min Val [a.u.]	Max Val [a.u.]
C2-MAX_VA DIV2 neuron #2_all_1x2-1	N1	Default	Primary	Default	31.922	34.611	11.954	4	69
C2-MAX_VA DIV2 neuron #2_all_1x2-1	N2	Default	Primary	Default	15.482	28.057	11.804	4	58
C2-MAX_VA DIV2 neuron #2_all_1x2-1	N3	Default	Primary	Default	12.746	52.448	22.604	12	114
C2-MAX_VA DIV2 neuron #2_all_1x2-1	N4	Default	Primary	Default	16.999	25.132	11.781	8	48
C2-MAX_VA DIV2 neuron #2_all_1x2-1	N5	Default	Primary	Default	87.744	65.295	40.91	7	153
C2-MAX_VA DIV2 neuron #2_all_1x2-1	N6	Default	Primary	Default	10.089	28.254	7.262	12	43
C2-MAX_VA DIV2 neuron #2_all_1x2-1	N7	Default	Primary	Default	12.486	12.047	6.801	3	42
C2-MAX_VA DIV2 neuron #2_all_1x2-1	N8	Default	Secondary	Default	5.277	6.39	2.801	3	13
C2-MAX_VA DIV2 neuron #2_all_1x2-1	N9	Default	Secondary	Default	8.695	13.518	13.437	4	96
C2-MAX_VA DIV2 neuron #2_all_1x2-1	N10	Default	Secondary	Default	2.565	15	8.724	6	32
C2-MAX_VA DIV2 neuron #2_all_1x2-1	N11	Default	Secondary	Default	3.705	11.231	8.937	2	34
640 Groups
Image	Cluster	Type	Count	Sum Len [micron]	Mean Len [micron]	SD Len [micron]	Min Len [micron]	Max Len [micron]	Mean Val [a.u.]	SD Val [a.u.]	Min Val [a.u.]	Max Val [a.u.]
C2-MAX_VA DIV2 neuron #2_all_1x2-1	All	All	11	207.711	18.883	24.225	2.565	87.744	43.555	35.145	2	153
Image 2
VA DIV2 neuron #3_all
Electroporation efficency by measuring GFP efficency with "Minimum" ROI (only covering soma)
		Label	Area	Mean	Min	Max	BX	BY	Width	Height	IntDen	RawIntDen
488	1	C1-MAX_VA DIV2 neuron #3_all_2x1.nd2:VA DIV2 neuron #3_all_2x1_M...	53.351	162.118	110	255	80.667	24.4	8.533	11.333	8649.16	486515
640	2	C2-MAX_VA DIV2 neuron #3_all_2x1.nd2:VA DIV2 neuron #3_all_2x1_M...	53.351	93.303	13	255	80.667	24.4	8.533	11.333	4977.83	280003
405	3	C3-MAX_VA DIV2 neuron #3_all_2x1.nd2:VA DIV2 neuron #3_all_2x1_M...	53.351	53.339	4	139	80.667	24.4	8.533	11.333	2845.67	160069
640 Tracings
Image	Tracing	Cluster	Type	Label	Length [micron]	Mean Val [a.u.]	SD Val [a.u.]	Min Val [a.u.]	Max Val [a.u.]
C2-MAX_VA DIV2 neuron #3_all_2x1	N1	Default	Primary	Default	26.803	50.571	20.166	10	94
C2-MAX_VA DIV2 neuron #3_all_2x1	N2	Default	Primary	Default	36.701	65.175	26.107	14	146
C2-MAX_VA DIV2 neuron #3_all_2x1	N3	Default	Primary	Default	74.63	46.031	25.055	7	131
C2-MAX_VA DIV2 neuron #3_all_2x1	N4	Default	Primary	Default	21.751	30.652	22.23	2	71
C2-MAX_VA DIV2 neuron #3_all_2x1	N5	Default	Secondary	Default	24.262	60.657	18.26	8	92
C2-MAX_VA DIV2 neuron #3_all_2x1	N6	Default	Secondary	Default	16.305	45.968	20.744	9	83
C2-MAX_VA DIV2 neuron #3_all_2x1	N7	Default	Tertiary	Default	2.311	6.75	2.72	3	11
640 Groups
Image	Cluster	Type	Count	Sum Len [micron]	Mean Len [micron]	SD Len [micron]	Min Len [micron]	Max Len [micron]	Mean Val [a.u.]	SD Val [a.u.]	Min Val [a.u.]	Max Val [a.u.]
C2-MAX_VA DIV2 neuron #3_all_2x1	All	All	7	202.762	28.966	22.711	2.311	74.63	49.667	25.545	2	146
Image 3
VA DIV2 neuron #4_all
Electroporation efficency by measuring GFP efficency with "Minimum" ROI (only covering soma)
		Label	Area	Mean	Min	Max	BX	BY	Width	Height	IntDen	RawIntDen
488	1	C1-MAX_VA DIV2 neuron #4_all_1x1.nd2:VA DIV2 neuron #4_all_1x1_M...	86.684	163.286	118	255	9.467	26.667	13.2	14.267	14154.4	796184
640	2	C2-MAX_VA DIV2 neuron #4_all_1x1.nd2:VA DIV2 neuron #4_all_1x1_M...	86.684	64.752	6	206	9.467	26.667	13.2	14.267	5613.01	315732
405	3	C3-MAX_VA DIV2 neuron #4_all_1x1.nd2:VA DIV2 neuron #4_all_1x1_M...	86.684	44.836	3	139	9.467	26.667	13.2	14.267	3886.61	218622
640 Tracings
Image	Tracing	Cluster	Type	Label	Length [micron]	Mean Val [a.u.]	SD Val [a.u.]	Min Val [a.u.]	Max Val [a.u.]
C2-MAX_VA DIV2 neuron #4_all_1x1	N1	Default	Primary	Default	88.464	80.212	27.163	14	148
C2-MAX_VA DIV2 neuron #4_all_1x1	N2	Default	Primary	Default	13.373	21.485	7.352	8	43
C2-MAX_VA DIV2 neuron #4_all_1x1	N3	Default	Primary	Default	19.639	39.433	15.082	5	73
C2-MAX_VA DIV2 neuron #4_all_1x1	N4	Default	Secondary	Default	57.967	51.57	21.218	4	106
C2-MAX_VA DIV2 neuron #4_all_1x1	N5	Default	Secondary	Default	8.76	23.242	16.03	7	72
C2-MAX_VA DIV2 neuron #4_all_1x1	N6	Default	Secondary	Default	22.722	59.053	13.82	28	104
640 Groups
Image	Cluster	Type	Count	Sum Len [micron]	Mean Len [micron]	SD Len [micron]	Min Len [micron]	Max Len [micron]	Mean Val [a.u.]	SD Val [a.u.]	Min Val [a.u.]	Max Val [a.u.]
C2-MAX_VA DIV2 neuron #4_all_1x1	All	All	6	210.925	35.154	31.397	8.76	88.464	59.363	29.559	4	148
Image 4
VA DIV2 neuron #5_all
Electroporation efficency by measuring GFP efficency with "Minimum" ROI (only covering soma)
		Label	Area	Mean	Min	Max	BX	BY	Width	Height	IntDen	RawIntDen
488	1	C1-MAX_VA DIV2 neuron #5_all_2x1.nd2:VA DIV2 neuron #5_all_2x1_M...	95.609	128.255	95	255	29.6	2	45.467	30.4	12262.3	689756
640	2	C2-MAX_VA DIV2 neuron #5_all_2x1.nd2:VA DIV2 neuron #5_all_2x1_M...	95.609	73.235	9	245	29.6	2	45.467	30.4	7001.96	393860
405	3	C3-MAX_VA DIV2 neuron #5_all_2x1.nd2:VA DIV2 neuron #5_all_2x1_M...	95.609	42.377	3	119	29.6	2	45.467	30.4	4051.64	227905
640 Tracings
Image	Tracing	Cluster	Type	Label	Length [micron]	Mean Val [a.u.]	SD Val [a.u.]	Min Val [a.u.]	Max Val [a.u.]
C2-MAX_VA DIV2 neuron #5_all_2x1	N1	Default	Primary	Default	79.751	108.297	38.685	15	152
C2-MAX_VA DIV2 neuron #5_all_2x1	N2	Default	Primary	Default	10.487	16.711	5.376	7	28
C2-MAX_VA DIV2 neuron #5_all_2x1	N3	Default	Primary	Default	12.733	12.769	6.552	2	26
C2-MAX_VA DIV2 neuron #5_all_2x1	N4	Default	Primary	Default	14.492	56.566	23.435	8	89
C2-MAX_VA DIV2 neuron #5_all_2x1	N5	Default	Primary	Default	27.743	55.45	31.575	1	121
C2-MAX_VA DIV2 neuron #5_all_2x1	N6	Default	Secondary	Default	28.33	40.439	21.363	1	88
C2-MAX_VA DIV2 neuron #5_all_2x1	N7	Default	Secondary	Default	6.03	30.61	25.033	10	130
C2-MAX_VA DIV2 neuron #5_all_2x1	N8	Default	Secondary	Default	9.413	34.485	22.235	7	77
640 Groups
Image	Cluster	Type	Count	Sum Len [micron]	Mean Len [micron]	SD Len [micron]	Min Len [micron]	Max Len [micron]	Mean Val [a.u.]	SD Val [a.u.]	Min Val [a.u.]	Max Val [a.u.]
C2-MAX_VA DIV2 neuron #5_all_2x1	All	All	8	188.98	23.622	24.129	6.03	79.751	69.05	47.347	1	152
Image 5
VA DIV2 neuron #6_all
Electroporation efficency by measuring GFP efficency with "Minimum" ROI (only covering soma)
		Label	Area	Mean	Min	Max	BX	BY	Width	Height	IntDen	RawIntDen
488	1	C1-MAX_VA DIV2 neuron #6_all_2x1.nd2:VA DIV2 neuron #6_all_2x1_M...	74.756	150.377	105	255	44.533	7.467	61.467	39.333	11241.5	632337
640	2	C2-MAX_VA DIV2 neuron #6_all_2x1.nd2:VA DIV2 neuron #6_all_2x1_M...	74.756	83.209	2	255	44.533	7.467	61.467	39.333	6220.36	349895
405	3	C3-MAX_VA DIV2 neuron #6_all_2x1.nd2:VA DIV2 neuron #6_all_2x1_M...	74.756	40.843	2	127	44.533	7.467	61.467	39.333	3053.26	171746
640 Tracings
Image	Tracing	Cluster	Type	Label	Length [micron]	Mean Val [a.u.]	SD Val [a.u.]	Min Val [a.u.]	Max Val [a.u.]
C2-MAX_VA DIV2 neuron #6_all_2x1	N1	Default	Primary	Default	16.838	37.812	18.001	5	76
C2-MAX_VA DIV2 neuron #6_all_2x1	N2	Default	Primary	Default	19.258	55.966	20.535	12	95
C2-MAX_VA DIV2 neuron #6_all_2x1	N3	Default	Primary	Default	6.564	17.667	4.828	8	25
C2-MAX_VA DIV2 neuron #6_all_2x1	N4	Default	Primary	Default	9.24	24.746	9.597	7	43
C2-MAX_VA DIV2 neuron #6_all_2x1	N5	Default	Primary	Default	13.518	33.396	15.646	4	64
C2-MAX_VA DIV2 neuron #6_all_2x1	N6	Default	Primary	Default	9.636	9.318	7.632	2	28
C2-MAX_VA DIV2 neuron #6_all_2x1	N7	Default	Primary	Default	86.916	60.874	29.461	7	132
C2-MAX_VA DIV2 neuron #6_all_2x1	N8	Default	Secondary	Default	11.551	17.671	8.858	4	39
640 Groups
Image	Cluster	Type	Count	Sum Len [micron]	Mean Len [micron]	SD Len [micron]	Min Len [micron]	Max Len [micron]	Mean Val [a.u.]	SD Val [a.u.]	Min Val [a.u.]	Max Val [a.u.]
C2-MAX_VA DIV2 neuron #6_all_2x1	All	All	8	173.521	21.69	26.679	6.564	86.916	46.508	29.403	2	132
Image 6
VA DIV2 neuron #7_all
Electroporation efficency by measuring GFP efficency with "Minimum" ROI (only covering soma)
		Label	Area	Mean	Min	Max	BX	BY	Width	Height	IntDen	RawIntDen
488	1	C1-MAX_VA DIV2 neuron #7_all_2x2.nd2:VA DIV2 neuron #7_all_2x2_M...	43.556	141.669	89	255	9.867	32.4	79.067	63.733	6170.47	347089
640	2	C2-MAX_VA DIV2 neuron #7_all_2x2.nd2:VA DIV2 neuron #7_all_2x2_M...	43.556	41.156	4	102	9.867	32.4	79.067	63.733	1792.57	100832
405	3	C3-MAX_VA DIV2 neuron #7_all_2x2.nd2:VA DIV2 neuron #7_all_2x2_M...	43.556	62.062	3	126	9.867	32.4	79.067	63.733	2703.15	152052
640 Tracings
Image	Tracing	Cluster	Type	Label	Length [micron]	Mean Val [a.u.]	SD Val [a.u.]	Min Val [a.u.]	Max Val [a.u.]
C2-MAX_VA DIV2 neuron #7_all_2x2-1	N1	Default	Primary	Default	16.179	11.733	5.413	2	23
C2-MAX_VA DIV2 neuron #7_all_2x2-1	N2	Default	Primary	Default	75.241	27.157	8.976	7	59
C2-MAX_VA DIV2 neuron #7_all_2x2-1	N3	Default	Primary	Default	24.251	24.761	11.574	5	57
C2-MAX_VA DIV2 neuron #7_all_2x2-1	N4	Default	Primary	Default	13.173	18.066	8.692	4	36
640 Groups
Image	Cluster	Type	Count	Sum Len [micron]	Mean Len [micron]	SD Len [micron]	Min Len [micron]	Max Len [micron]	Mean Val [a.u.]	SD Val [a.u.]	Min Val [a.u.]	Max Val [a.u.]
C2-MAX_VA DIV2 neuron #7_all_2x2-1	All	All	4	128.843	32.211	29.065	13.173	75.241	23.889	10.58	2	59
Image 7
VA DIV2 neuron #8_all
Electroporation efficency by measuring GFP efficency with "Minimum" ROI (only covering soma)
		Label	Area	Mean	Min	Max	BX	BY	Width	Height	IntDen	RawIntDen
488	1	C1-MAX_VA DIV2 neuron #8_all_2x3.nd2:VA DIV2 neuron #8_all_2x3_M...	221.173	136.503	81	255	8.667	52.8	92.4	125.6	30190.9	1698238
640	2	C2-MAX_VA DIV2 neuron #8_all_2x3.nd2:VA DIV2 neuron #8_all_2x3_M...	221.173	95.425	2	255	8.667	52.8	92.4	125.6	21105.4	1187178
405	3	C3-MAX_VA DIV2 neuron #8_all_2x3.nd2:VA DIV2 neuron #8_all_2x3_M...	221.173	24.033	1	72	8.667	52.8	92.4	125.6	5315.48	298996
640 Tracings
Image	Tracing	Cluster	Type	Label	Length [micron]	Mean Val [a.u.]	SD Val [a.u.]	Min Val [a.u.]	Max Val [a.u.]
C2-MAX_VA DIV2 neuron #8_all_2x3	N1	Default	Primary	Default	21.28	37.929	21.875	1	74
C2-MAX_VA DIV2 neuron #8_all_2x3	N2	Default	Primary	Default	8.474	13.125	5.491	7	36
C2-MAX_VA DIV2 neuron #8_all_2x3	N3	Default	Primary	Default	12.465	25.187	6.347	10	37
C2-MAX_VA DIV2 neuron #8_all_2x3	N4	Default	Primary	Default	10.306	21.258	11.949	3	54
C2-MAX_VA DIV2 neuron #8_all_2x3	N5	Default	Primary	Default	109.103	60.878	17.214	8	108
C2-MAX_VA DIV2 neuron #8_all_2x3	N6	Default	Secondary	Default	12.622	25.375	10.269	4	43
C2-MAX_VA DIV2 neuron #8_all_2x3	N7	Default	Secondary	Default	11.009	24.316	9.867	6	43
C2-MAX_VA DIV2 neuron #8_all_2x3	N8	Default	Secondary	Default	8.759	16.607	7.766	4	31
C2-MAX_VA DIV2 neuron #8_all_2x3	N9	Default	Secondary	Default	8.18	9.054	7.292	1	28
640 Groups
Image	Cluster	Type	Count	Sum Len [micron]	Mean Len [micron]	SD Len [micron]	Min Len [micron]	Max Len [micron]	Mean Val [a.u.]	SD Val [a.u.]	Min Val [a.u.]	Max Val [a.u.]
C2-MAX_VA DIV2 neuron #8_all_2x3	All	All	9	202.198	22.466	32.732	8.18	109.103	43.914	24.608	1	108
Image 8
VA DIV2 neuron #9_all
Electroporation efficency by measuring GFP efficency with "Minimum" ROI (only covering soma)
		Label	Area	Mean	Min	Max	BX	BY	Width	Height	IntDen	RawIntDen
488	1	C1-MAX_VA DIV2 neuron #9_all_1x2.nd2:VA DIV2 neuron #9_all_1x2_M...	51.804	148.824	97	255	17.067	30.133	28.667	53.867	7709.72	433672
640	2	C2-MAX_VA DIV2 neuron #9_all_1x2.nd2:VA DIV2 neuron #9_all_1x2_M...	51.804	93.993	12	247	17.067	30.133	28.667	53.867	4869.26	273896
405	3	C3-MAX_VA DIV2 neuron #9_all_1x2.nd2:VA DIV2 neuron #9_all_1x2_M...	51.804	73.536	5	168	17.067	30.133	28.667	53.867	3809.48	214283
640 Tracings
Image	Tracing	Cluster	Type	Label	Length [micron]	Mean Val [a.u.]	SD Val [a.u.]	Min Val [a.u.]	Max Val [a.u.]
C2-MAX_VA DIV2 neuron #9_all_1x2	N1	Default	Primary	Default	11.111	31.062	21.695	5	80
C2-MAX_VA DIV2 neuron #9_all_1x2	N2	Default	Primary	Default	85.667	129.261	29.921	4	152
C2-MAX_VA DIV2 neuron #9_all_1x2	N3	Default	Primary	Default	8.488	20.286	12.312	3	44
C2-MAX_VA DIV2 neuron #9_all_1x2	N4	Default	Secondary	Default	4.28	31.639	5.172	22	41
C2-MAX_VA DIV2 neuron #9_all_1x2	N5	Default	Secondary	Default	41.497	20.661	23.201	1	142
C2-MAX_VA DIV2 neuron #9_all_1x2	N6	Default	Tertiary	Default	10.701	13.432	5.964	5	29
640 Groups
Image	Cluster	Type	Count	Sum Len [micron]	Mean Len [micron]	SD Len [micron]	Min Len [micron]	Max Len [micron]	Mean Val [a.u.]	SD Val [a.u.]	Min Val [a.u.]	Max Val [a.u.]
C2-MAX_VA DIV2 neuron #9_all_1x2	All	All	6	161.744	26.957	31.714	4.28	85.667	78.643	59.455	1	152
Image 9
VA DIV2 neuron #10_all
Electroporation efficency by measuring GFP efficency with "Minimum" ROI (only covering soma)
		Label	Area	Mean	Min	Max	BX	BY	Width	Height	IntDen	RawIntDen
488	1	C1-MAX_VA DIV2 neuron #10_all_2x1.nd2:VA DIV2 neuron #10_all_2x1_...	77.529	139.691	91	255	23.2	23.333	56.933	12.533	10830.1	609192
640	2	C2-MAX_VA DIV2 neuron #10_all_2x1.nd2:VA DIV2 neuron #10_all_2x1_...	77.529	93.876	21	255	23.2	23.333	56.933	12.533	7278.08	409392
405	3	C3-MAX_VA DIV2 neuron #10_all_2x1.nd2:VA DIV2 neuron #10_all_2x1_...	77.529	42.224	2	112	23.2	23.333	56.933	12.533	3273.55	184137
640 Tracings
Image	Tracing	Cluster	Type	Label	Length [micron]	Mean Val [a.u.]	SD Val [a.u.]	Min Val [a.u.]	Max Val [a.u.]
C2-MAX_VA DIV2 neuron #10_all_2x1	N1	Default	Primary	Default	16.517	57.306	22.959	12	108
C2-MAX_VA DIV2 neuron #10_all_2x1	N2	Default	Primary	Default	19.28	47.007	22.602	10	125
C2-MAX_VA DIV2 neuron #10_all_2x1	N3	Default	Primary	Default	16.096	24.566	9.354	11	60
C2-MAX_VA DIV2 neuron #10_all_2x1	N4	Default	Primary	Default	23.693	50.061	22.136	10	106
C2-MAX_VA DIV2 neuron #10_all_2x1	N5	Default	Primary	Default	11.411	19.182	7.575	8	37
C2-MAX_VA DIV2 neuron #10_all_2x1	N6	Default	Primary	Default	52.432	54.238	18.554	17	127
640 Groups
Image	Cluster	Type	Count	Sum Len [micron]	Mean Len [micron]	SD Len [micron]	Min Len [micron]	Max Len [micron]	Mean Val [a.u.]	SD Val [a.u.]	Min Val [a.u.]	Max Val [a.u.]
C2-MAX_VA DIV2 neuron #10_all_2x1	All	All	6	139.428	23.238	14.861	11.411	52.432	47.242	22.579	8	127
Image 10
VA DIV2 neuron #11_all
Electroporation efficency by measuring GFP efficency with "Minimum" ROI (only covering soma)
		Label	Area	Mean	Min	Max	BX	BY	Width	Height	IntDen	RawIntDen
488	1	C1-MAX_VA DIV2 neuron #11_all_2x1.nd2:VA DIV2 neuron #11_all_2x1_...	59.538	152.749	114	255	35.733	23.333	89.733	41.6	9094.35	511557
640	2	C2-MAX_VA DIV2 neuron #11_all_2x1.nd2:VA DIV2 neuron #11_all_2x1_...	59.538	64.497	10	186	35.733	23.333	89.733	41.6	3840	216000
405	3	C3-MAX_VA DIV2 neuron #11_all_2x1.nd2:VA DIV2 neuron #11_all_2x1_...	59.538	58.895	3	122	35.733	23.333	89.733	41.6	3506.51	197241
640 Tracings
Image	Tracing	Cluster	Type	Label	Length [micron]	Mean Val [a.u.]	SD Val [a.u.]	Min Val [a.u.]	Max Val [a.u.]
C2-MAX_VA DIV2 neuron #11_all_2x1	N1	Default	Primary	Default	6.971	21.826	6.916	10	46
C2-MAX_VA DIV2 neuron #11_all_2x1	N2	Default	Primary	Default	73.183	57.333	37.458	9	153
C2-MAX_VA DIV2 neuron #11_all_2x1	N3	Default	Primary	Default	12.8	35.308	11.425	17	82
C2-MAX_VA DIV2 neuron #11_all_2x1	N4	Default	Primary	Default	14.902	26.613	10.258	8	61
C2-MAX_VA DIV2 neuron #11_all_2x1	N5	Default	Secondary	Default	24.987	31.778	10.712	10	65
C2-MAX_VA DIV2 neuron #11_all_2x1	N6	Default	Secondary	Default	5.203	27.129	7.284	13	43
C2-MAX_VA DIV2 neuron #11_all_2x1	N7	Default	Tertiary	Default	12.463	22.765	10.302	5	50
640 Groups
Image	Cluster	Type	Count	Sum Len [micron]	Mean Len [micron]	SD Len [micron]	Min Len [micron]	Max Len [micron]	Mean Val [a.u.]	SD Val [a.u.]	Min Val [a.u.]	Max Val [a.u.]
C2-MAX_VA DIV2 neuron #11_all_2x1	All	All	7	150.509	21.501	23.667	5.203	73.183	42.212	30.454	5	153
Image 11
VA DIV2 neuron #13_all
Electroporation efficency by measuring GFP efficency with "Minimum" ROI (only covering soma)
		Label	Area	Mean	Min	Max	BX	BY	Width	Height	IntDen	RawIntDen
488	1	C1-MAX_VA DIV2 neuron #13_all_1x1.nd2:VA DIV2 neuron #13_all_1x1_...	71.058	163.226	116	255	35.6	8.533	9.467	14	11598.5	652414
640	2	C2-MAX_VA DIV2 neuron #13_all_1x1.nd2:VA DIV2 neuron #13_all_1x1_...	71.058	114.385	9	245	35.6	8.533	9.467	14	8127.91	457195
405	3	C3-MAX_VA DIV2 neuron #13_all_1x1.nd2:VA DIV2 neuron #13_all_1x1_...	71.058	68.309	6	169	35.6	8.533	9.467	14	4853.87	273030
640 Tracings
Image	Tracing	Cluster	Type	Label	Length [micron]	Mean Val [a.u.]	SD Val [a.u.]	Min Val [a.u.]	Max Val [a.u.]
C2-MAX_VA DIV2 neuron #13_all_1x1	N1	Default	Primary	Default	8.901	19.167	10.134	3	35
C2-MAX_VA DIV2 neuron #13_all_1x1	N2	Default	Primary	Default	10.97	21.593	8.004	9	40
C2-MAX_VA DIV2 neuron #13_all_1x1	N3	Default	Primary	Default	55.168	91.647	39.538	22	149
C2-MAX_VA DIV2 neuron #13_all_1x1	N4	Default	Primary	Default	22.504	74.776	22.424	17	125
C2-MAX_VA DIV2 neuron #13_all_1x1	N5	Default	Primary	Default	12.804	23.724	14.764	4	53
C2-MAX_VA DIV2 neuron #13_all_1x1	N6	Default	Secondary	Default	12.054	23.198	11.583	10	54
C2-MAX_VA DIV2 neuron #13_all_1x1	N7	Default	Tertiary	Default	3.14	10.095	5.205	4	23
640 Groups
Image	Cluster	Type	Count	Sum Len [micron]	Mean Len [micron]	SD Len [micron]	Min Len [micron]	Max Len [micron]	Mean Val [a.u.]	SD Val [a.u.]	Min Val [a.u.]	Max Val [a.u.]
C2-MAX_VA DIV2 neuron #13_all_1x1	All	All	7	125.54	17.934	17.403	3.14	55.168	61.949	43.352	3	149
Image 12
VA DIV2 neuron #14_all
Electroporation efficency by measuring GFP efficency with "Minimum" ROI (only covering soma)
		Label	Area	Mean	Min	Max	BX	BY	Width	Height	IntDen	RawIntDen
488	1	C1-MAX_VA DIV2 neuron #14_all_1x1.nd2:VA DIV2 neuron #14_all_1x1_...	64.8	171.157	134	255	27.733	14.667	13.333	33.467	11091	623868
640	2	C2-MAX_VA DIV2 neuron #14_all_1x1.nd2:VA DIV2 neuron #14_all_1x1_...	64.8	118.099	13	246	27.733	14.667	13.333	33.467	7652.84	430472
405	3	C3-MAX_VA DIV2 neuron #14_all_1x1.nd2:VA DIV2 neuron #14_all_1x1_...	64.8	54.411	4	143	27.733	14.667	13.333	33.467	3525.83	198328
640 Tracings
Image	Tracing	Cluster	Type	Label	Length [micron]	Mean Val [a.u.]	SD Val [a.u.]	Min Val [a.u.]	Max Val [a.u.]
C2-MAX_VA DIV2 neuron #14_all_1x1	N1	Default	Primary	Default	5.81	31.174	13.814	15	80
C2-MAX_VA DIV2 neuron #14_all_1x1	N2	Default	Primary	Default	8.285	34.131	16.646	7	71
C2-MAX_VA DIV2 neuron #14_all_1x1	N3	Default	Primary	Default	5.373	55.756	14.819	21	73
C2-MAX_VA DIV2 neuron #14_all_1x1	N4	Default	Primary	Default	8.878	58.787	15.243	38	94
C2-MAX_VA DIV2 neuron #14_all_1x1	N5	Default	Primary	Default	66.541	78.569	26.486	20	146
640 Groups
Image	Cluster	Type	Count	Sum Len [micron]	Mean Len [micron]	SD Len [micron]	Min Len [micron]	Max Len [micron]	Mean Val [a.u.]	SD Val [a.u.]	Min Val [a.u.]	Max Val [a.u.]
C2-MAX_VA DIV2 neuron #14_all_1x1	All	All	5	94.888	18.978	26.632	5.373	66.541	68.15	29.077	7	146
Image 13
VA DIV2 neuron #16_all
Electroporation efficency by measuring GFP efficency with "Minimum" ROI (only covering soma)
		Label	Area	Mean	Min	Max	BX	BY	Width	Height	IntDen	RawIntDen
488	1	C1-MAX_VA DIV2 neuron #16_all_1x2.nd2:VA DIV2 neuron #16_all_1x2_...	64.16	160.01	115	255	15.2	40.4	15.2	32.933	10266.2	577476
640	2	C2-MAX_VA DIV2 neuron #16_all_1x2.nd2:VA DIV2 neuron #16_all_1x2_...	64.16	105.794	15	251	15.2	40.4	15.2	32.933	6787.72	381809
405	3	C3-MAX_VA DIV2 neuron #16_all_1x2.nd2:VA DIV2 neuron #16_all_1x2_...	64.16	48.753	3	107	15.2	40.4	15.2	32.933	3128.02	175951
640 Tracings
Image	Tracing	Cluster	Type	Label	Length [micron]	Mean Val [a.u.]	SD Val [a.u.]	Min Val [a.u.]	Max Val [a.u.]
C2-MAX_VA DIV2 neuron #16_all_1x2	N1	Default	Primary	Default	11.893	35.43	15.274	4	64
C2-MAX_VA DIV2 neuron #16_all_1x2	N2	Default	Primary	Default	5.673	20.293	6.835	8	35
C2-MAX_VA DIV2 neuron #16_all_1x2	N3	Default	Primary	Default	7.709	17.717	8.699	5	37
C2-MAX_VA DIV2 neuron #16_all_1x2	N4	Default	Primary	Default	108.99	85.816	33.458	11	153
C2-MAX_VA DIV2 neuron #16_all_1x2	N5	Default	Primary	Default	10.44	30.895	17.717	7	69
C2-MAX_VA DIV2 neuron #16_all_1x2	N6	Default	Primary	Default	13.909	71.723	35.24	8	129
C2-MAX_VA DIV2 neuron #16_all_1x2	N7	Default	Primary	Default	6.705	19	5.192	9	30
C2-MAX_VA DIV2 neuron #16_all_1x2	N8	Default	Primary	Default	11.007	51.432	23.002	9	92
C2-MAX_VA DIV2 neuron #16_all_1x2	N9	Default	Secondary	Default	5.945	14.306	12.34	1	44
C2-MAX_VA DIV2 neuron #16_all_1x2	N10	Default	Secondary	Default	6.204	14.488	15.447	1	44
640 Groups
Image	Cluster	Type	Count	Sum Len [micron]	Mean Len [micron]	SD Len [micron]	Min Len [micron]	Max Len [micron]	Mean Val [a.u.]	SD Val [a.u.]	Min Val [a.u.]	Max Val [a.u.]
C2-MAX_VA DIV2 neuron #16_all_1x2	All	All	10	188.474	18.847	31.801	5.673	108.99	64.377	39.763	1	153
Image 14
VA DIV2 neuron #17_all
Electroporation efficency by measuring GFP efficency with "Minimum" ROI (only covering soma)
		Label	Area	Mean	Min	Max	BX	BY	Width	Height	IntDen	RawIntDen
488	1	C1-MAX_VA DIV2 neuron #17_all_2x1.nd2:VA DIV2 neuron #17_all_2x1_...	77.582	162.424	109	255	37.733	11.067	46.667	30.533	12601.2	708818
640	2	C2-MAX_VA DIV2 neuron #17_all_2x1.nd2:VA DIV2 neuron #17_all_2x1_...	77.582	86.631	9	255	37.733	11.067	46.667	30.533	6721.01	378057
405	3	C3-MAX_VA DIV2 neuron #17_all_2x1.nd2:VA DIV2 neuron #17_all_2x1_...	77.582	21.87	2	51	37.733	11.067	46.667	30.533	1696.71	95440
640 Tracings
Image	Tracing	Cluster	Type	Label	Length [micron]	Mean Val [a.u.]	SD Val [a.u.]	Min Val [a.u.]	Max Val [a.u.]
C2-MAX_VA DIV2 neuron #17_all_2x1	N1	Default	Primary	Default	14.091	31.564	10.923	11	56
C2-MAX_VA DIV2 neuron #17_all_2x1	N2	Default	Primary	Default	11.396	30.382	13.209	8	54
C2-MAX_VA DIV2 neuron #17_all_2x1	N3	Default	Primary	Default	15.181	40.06	8.664	23	55
C2-MAX_VA DIV2 neuron #17_all_2x1	N4	Default	Primary	Default	59.579	71.401	16.766	13	113
640 Groups
Image	Cluster	Type	Count	Sum Len [micron]	Mean Len [micron]	SD Len [micron]	Min Len [micron]	Max Len [micron]	Mean Val [a.u.]	SD Val [a.u.]	Min Val [a.u.]	Max Val [a.u.]
C2-MAX_VA DIV2 neuron #17_all_2x1	All	All	4	100.246	25.062	23.066	11.396	59.579	56.094	23.434	8	113
Image 15
VA DIV2 neuron #18_all
Electroporation efficency by measuring GFP efficency with "Minimum" ROI (only covering soma)
		Label	Area	Mean	Min	Max	BX	BY	Width	Height	IntDen	RawIntDen
488	1	C1-MAX_VA DIV2 neuron #18_all_2x1.nd2:VA DIV2 neuron #18_all_2x1_...	63.876	140.726	94	255	91.2	12.133	9.467	20.533	8988.92	505627
640	2	C2-MAX_VA DIV2 neuron #18_all_2x1.nd2:VA DIV2 neuron #18_all_2x1_...	63.876	54.658	11	221	91.2	12.133	9.467	20.533	3491.31	196386
405	3	C3-MAX_VA DIV2 neuron #18_all_2x1.nd2:VA DIV2 neuron #18_all_2x1_...	63.876	56.852	3	125	91.2	12.133	9.467	20.533	3631.47	204270
640 Tracings
Image	Tracing	Cluster	Type	Label	Length [micron]	Mean Val [a.u.]	SD Val [a.u.]	Min Val [a.u.]	Max Val [a.u.]
C2-MAX_VA DIV2 neuron #18_all_2x1	N1	Default	Primary	Default	6.065	8.732	3.688	3	17
C2-MAX_VA DIV2 neuron #18_all_2x1	N2	Default	Primary	Default	6.847	9.951	5.454	2	22
C2-MAX_VA DIV2 neuron #18_all_2x1	N3	Default	Primary	Default	9.562	24.197	13.317	3	53
C2-MAX_VA DIV2 neuron #18_all_2x1	N4	Default	Primary	Default	85.285	83.564	25.443	21	153
C2-MAX_VA DIV2 neuron #18_all_2x1	N5	Default	Primary	Default	13.575	17.099	10.939	4	41
C2-MAX_VA DIV2 neuron #18_all_2x1	N6	Default	Primary	Default	13.425	28.953	13.99	4	61
640 Groups
Image	Cluster	Type	Count	Sum Len [micron]	Mean Len [micron]	SD Len [micron]	Min Len [micron]	Max Len [micron]	Mean Val [a.u.]	SD Val [a.u.]	Min Val [a.u.]	Max Val [a.u.]
C2-MAX_VA DIV2 neuron #18_all_2x1	All	All	6	134.759	22.46	30.94	6.065	85.285	61.233	37.515	2	153
Image 16
VA DIV2 neuron #24_all
Electroporation efficency by measuring GFP efficency with "Minimum" ROI (only covering soma)
		Label	Area	Mean	Min	Max	BX	BY	Width	Height	IntDen	RawIntDen
488	1	C1-MAX_VA DIV2 neuron #24_all_1x3.nd2:VA DIV2 neuron #24_all_1x3_...	70.916	164.99	108	255	6.4	49.333	58.4	131.333	11700.3	658144
640	2	C2-MAX_VA DIV2 neuron #24_all_1x3.nd2:VA DIV2 neuron #24_all_1x3_...	70.916	90.404	7	193	6.4	49.333	58.4	131.333	6411.04	360621
405	3	C3-MAX_VA DIV2 neuron #24_all_1x3.nd2:VA DIV2 neuron #24_all_1x3_...	70.916	52.078	3	124	6.4	49.333	58.4	131.333	3693.12	207738
640 Tracings
Image	Tracing	Cluster	Type	Label	Length [micron]	Mean Val [a.u.]	SD Val [a.u.]	Min Val [a.u.]	Max Val [a.u.]
C2-MAX_VA DIV2 neuron #24_all_1x3	N1	Default	Primary	Default	18.534	45.931	19.944	7	74
C2-MAX_VA DIV2 neuron #24_all_1x3	N2	Default	Primary	Default	19.08	33.589	17.858	5	70
C2-MAX_VA DIV2 neuron #24_all_1x3	N3	Default	Primary	Default	114.458	96.897	28.738	6	149
C2-MAX_VA DIV2 neuron #24_all_1x3	N4	Default	Primary	Default	12.381	27.868	15.402	1	61
C2-MAX_VA DIV2 neuron #24_all_1x3	N5	Default	Primary	Default	9.012	55.07	20.681	5	94
C2-MAX_VA DIV2 neuron #24_all_1x3	N6	Default	Secondary	Default	7.819	14.609	19.222	3	109
C2-MAX_VA DIV2 neuron #24_all_1x3	N7	Default	Secondary	Default	3.782	5.548	7.316	1	29
640 Groups
Image	Cluster	Type	Count	Sum Len [micron]	Mean Len [micron]	SD Len [micron]	Min Len [micron]	Max Len [micron]	Mean Val [a.u.]	SD Val [a.u.]	Min Val [a.u.]	Max Val [a.u.]
C2-MAX_VA DIV2 neuron #24_all_1x3	All	All	7	185.067	26.438	39.212	3.782	114.458	73.156	40.003	1	149
Image 17
VA DIV2 neuron #28_all
Electroporation efficency by measuring GFP efficency with "Minimum" ROI (only covering soma)
		Label	Area	Mean	Min	Max	BX	BY	Width	Height	IntDen	RawIntDen
488	1	C1-MAX_VA DIV2 neuron #28_all_2x2.nd2:VA DIV2 neuron #28_all_2x2_...	71.324	151.19	85	255	41.6	79.733	12.8	8.667	10783.5	606574
640	2	C2-MAX_VA DIV2 neuron #28_all_2x2.nd2:VA DIV2 neuron #28_all_2x2_...	71.324	120.53	10	251	41.6	79.733	12.8	8.667	8596.75	483567
405	3	C3-MAX_VA DIV2 neuron #28_all_2x2.nd2:VA DIV2 neuron #28_all_2x2_...	71.324	45.192	4	126	41.6	79.733	12.8	8.667	3223.27	181309
640 Tracings
Image	Tracing	Cluster	Type	Label	Length [micron]	Mean Val [a.u.]	SD Val [a.u.]	Min Val [a.u.]	Max Val [a.u.]
C2-MAX_VA DIV2 neuron #28_all_2x2	N1	Default	Primary	Default	9.413	36.028	20.945	4	67
C2-MAX_VA DIV2 neuron #28_all_2x2	N2	Default	Primary	Default	13.291	62.375	24.39	15	118
C2-MAX_VA DIV2 neuron #28_all_2x2	N3	Default	Primary	Default	59.291	85.26	28.533	19	147
C2-MAX_VA DIV2 neuron #28_all_2x2	N4	Default	Primary	Default	10.696	35.924	20.204	7	76
C2-MAX_VA DIV2 neuron #28_all_2x2	N5	Default	Primary	Default	19.944	55.787	24.695	6	104
C2-MAX_VA DIV2 neuron #28_all_2x2	N6	Default	Primary	Default	14.636	29.792	16.846	4	62
C2-MAX_VA DIV2 neuron #28_all_2x2	N7	Default	Secondary	Default	5.358	26.878	9.86	9	41
640 Groups
Image	Cluster	Type	Count	Sum Len [micron]	Mean Len [micron]	SD Len [micron]	Min Len [micron]	Max Len [micron]	Mean Val [a.u.]	SD Val [a.u.]	Min Val [a.u.]	Max Val [a.u.]
C2-MAX_VA DIV2 neuron #28_all_2x2	All	All	7	132.629	18.947	18.362	5.358	59.291	61.77	33.454	4	147
Image 18 (good for pub!!)
VA DIV2 neuron #30_all
Electroporation efficency by measuring GFP efficency with "Minimum" ROI (only covering soma)
		Label	Area	Mean	Min	Max	BX	BY	Width	Height	IntDen	RawIntDen
488	1	C1-MAX_VA DIV2 neuron #30_all_2x2.nd2:VA DIV2 neuron #30_all_2x2_...	88.889	162.749	92	255	68.933	36.533	13.2	10.933	14466.6	813747
640	2	C2-MAX_VA DIV2 neuron #30_all_2x2.nd2:VA DIV2 neuron #30_all_2x2_...	88.889	166.492	33	255	68.933	36.533	13.2	10.933	14799.3	832462
405	3	C3-MAX_VA DIV2 neuron #30_all_2x2.nd2:VA DIV2 neuron #30_all_2x2_...	88.889	40.168	3	115	68.933	36.533	13.2	10.933	3570.45	200838
640 Tracings
Image	Tracing	Cluster	Type	Label	Length [micron]	Mean Val [a.u.]	SD Val [a.u.]	Min Val [a.u.]	Max Val [a.u.]
C2-MAX_VA DIV2 neuron #30_all_2x2	N1	Default	Primary	Default	13.593	91.307	34.089	11	140
C2-MAX_VA DIV2 neuron #30_all_2x2	N2	Default	Primary	Default	15.656	63.693	29.188	13	116
C2-MAX_VA DIV2 neuron #30_all_2x2	N3	Default	Primary	Default	18.806	65.359	39.529	9	142
C2-MAX_VA DIV2 neuron #30_all_2x2	N4	Default	Primary	Default	36.093	58.531	35.122	1	145
C2-MAX_VA DIV2 neuron #30_all_2x2	N5	Default	Primary	Default	65.642	83.441	27.467	23	145
C2-MAX_VA DIV2 neuron #30_all_2x2	N6	Default	Primary	Default	25.005	83.628	43.631	5	146
C2-MAX_VA DIV2 neuron #30_all_2x2	N7	Default	Secondary	Default	5.934	42.902	37.35	9	145
C2-MAX_VA DIV2 neuron #30_all_2x2	N8	Default	Secondary	Default	21.265	38.382	18.353	8	106
C2-MAX_VA DIV2 neuron #30_all_2x2	N9	Default	Secondary	Default	33.935	32.45	21.957	1	75
C2-MAX_VA DIV2 neuron #30_all_2x2	N10	Default	Tertiary	Default	9.496	30.183	22.675	1	85
640 Groups
Image	Cluster	Type	Count	Sum Len [micron]	Mean Len [micron]	SD Len [micron]	Min Len [micron]	Max Len [micron]	Mean Val [a.u.]	SD Val [a.u.]	Min Val [a.u.]	Max Val [a.u.]
C2-MAX_VA DIV2 neuron #30_all_2x2	All	All	10	245.425	24.542	17.404	5.934	65.642	63.735	37.397	1	146

## Sheet: WT DIV1 (2)
V409 neuron prep_09.21.2020
* all .nd2 images were converted into an 8-bit grayscale .tiff in order to be analyzed in NeuronJ (imageJ plugin) *
Scale is set at 7.5µm/pixel
Image 1
WT DIV1 neuron #1_all
Electroporation efficency by measuring GFP efficency with "Minimum" ROI (only covering soma)
		Label	Area	Mean	Min	Max	BX	BY	Width	Height	IntDen	RawIntDen
488	1	C1-MAX_WT DIV1 neuron #1_all_1x1.nd2:WT DIV1 neuron #1_all_1x1_M...	66.293	129.423	84	255	4.133	24.8	37.733	28.8	8579.86	482617
640	2	C2-MAX_WT DIV1 neuron #1_all_1x1.nd2:WT DIV1 neuron #1_all_1x1_M...	66.293	112.687	2	255	4.133	24.8	37.733	28.8	7470.4	420210
405	3	C3-MAX_WT DIV1 neuron #1_all_1x1.nd2:WT DIV1 neuron #1_all_1x1_M...	66.293	45.73	4	109	4.133	24.8	37.733	28.8	3031.57	170526
640 Tracings
Image	Tracing	Cluster	Type	Label	Length [micron]	Mean Val [a.u.]	SD Val [a.u.]	Min Val [a.u.]	Max Val [a.u.]
C2-MAX_WT DIV1 neuron #1_all_1x1	N1	Default	Primary	Default	9.504	30.254	11.027	7	53
C2-MAX_WT DIV1 neuron #1_all_1x1	N2	Default	Primary	Default	4.427	11.871	5.685	3	26
C2-MAX_WT DIV1 neuron #1_all_1x1	N3	Default	Primary	Default	8.051	24.157	10.972	7	41
C2-MAX_WT DIV1 neuron #1_all_1x1	N4	Default	Primary	Default	6.732	34.431	8.642	18	52
C2-MAX_WT DIV1 neuron #1_all_1x1	N5	Default	Primary	Default	2.954	26.038	6.82	13	44
640 Groups
Image	Cluster	Type	Count	Sum Len [micron]	Mean Len [micron]	SD Len [micron]	Min Len [micron]	Max Len [micron]	Mean Val [a.u.]	SD Val [a.u.]	Min Val [a.u.]	Max Val [a.u.]
C2-MAX_WT DIV1 neuron #1_all_1x1	All	All	5	31.667	6.333	2.656	2.954	9.504	26.874	11.727	3	53
Image 2
WT DIV1 neuron #2_all
Electroporation efficency by measuring GFP efficency with "Minimum" ROI (only covering soma)
		Label	Area	Mean	Min	Max	BX	BY	Width	Height	IntDen	RawIntDen
488	1	C1-MAX_WT DIV1 neuron #2_all_1x1.nd2:WT DIV1 neuron #2_all_1x1_M...	75.609	131.691	90	255	28	27.867	21.6	26	9956.98	560080
640	2	C2-MAX_WT DIV1 neuron #2_all_1x1.nd2:WT DIV1 neuron #2_all_1x1_M...	75.609	84.362	16	255	28	27.867	21.6	26	6378.52	358792
405	3	C3-MAX_WT DIV1 neuron #2_all_1x1.nd2:WT DIV1 neuron #2_all_1x1_M...	75.609	61.068	5	202	28	27.867	21.6	26	4617.32	259724
640 Tracings
Image	Tracing	Cluster	Type	Label	Length [micron]	Mean Val [a.u.]	SD Val [a.u.]	Min Val [a.u.]	Max Val [a.u.]
C2-MAX_WT DIV1 neuron #2_all_1x1	N1	Default	Primary	Default	16.383	38.94	16.879	9	82
C2-MAX_WT DIV1 neuron #2_all_1x1	N2	Default	Primary	Default	31.755	41.13	28.385	4	102
C2-MAX_WT DIV1 neuron #2_all_1x1	N3	Default	Secondary	Default	17.692	19.048	9.236	4	41
640 Groups
Image	Cluster	Type	Count	Sum Len [micron]	Mean Len [micron]	SD Len [micron]	Min Len [micron]	Max Len [micron]	Mean Val [a.u.]	SD Val [a.u.]	Min Val [a.u.]	Max Val [a.u.]
C2-MAX_WT DIV1 neuron #2_all_1x1	All	All	3	65.83	21.943	8.522	16.383	31.755	34.5	23.784	4	102
Image 3
WT DIV1 neuron #4_all
Electroporation efficency by measuring GFP efficency with "Minimum" ROI (only covering soma)
		Label	Area	Mean	Min	Max	BX	BY	Width	Height	IntDen	RawIntDen
488	1	C1-MAX_WT DIV1 neuron #4_all_1x1.nd2:WT DIV1 neuron #4_all_1x1_M...	49.333	129.139	87	255	34.667	14.8	23.2	25.467	6370.86	358361
640	2	C2-MAX_WT DIV1 neuron #4_all_1x1.nd2:WT DIV1 neuron #4_all_1x1_M...	49.333	111.377	12	255	34.667	14.8	23.2	25.467	5494.6	309071
405	3	C3-MAX_WT DIV1 neuron #4_all_1x1.nd2:WT DIV1 neuron #4_all_1x1_M...	49.333	61.689	4	146	34.667	14.8	23.2	25.467	3043.32	171187
640 Tracings
Image	Tracing	Cluster	Type	Label	Length [micron]	Mean Val [a.u.]	SD Val [a.u.]	Min Val [a.u.]	Max Val [a.u.]
C2-MAX_WT DIV1 neuron #4_all_1x1	N1	Default	Primary	Default	11.846	32.651	13.797	11	59
C2-MAX_WT DIV1 neuron #4_all_1x1	N2	Default	Primary	Default	44.083	27.692	14.574	1	67
C2-MAX_WT DIV1 neuron #4_all_1x1	N3	Default	Primary	Default	14.191	33.25	14.061	5	70
C2-MAX_WT DIV1 neuron #4_all_1x1	N4	Default	Primary	Default	21.802	39.118	17.368	3	78
640 Groups
Image	Cluster	Type	Count	Sum Len [micron]	Mean Len [micron]	SD Len [micron]	Min Len [micron]	Max Len [micron]	Mean Val [a.u.]	SD Val [a.u.]	Min Val [a.u.]	Max Val [a.u.]
C2-MAX_WT DIV1 neuron #4_all_1x1	All	All	4	91.922	22.98	14.696	11.846	44.083	31.854	15.698	1	78
Image 4
WT DIV1 neuron #8_all
Electroporation efficency by measuring GFP efficency with "Minimum" ROI (only covering soma)
		Label	Area	Mean	Min	Max	BX	BY	Width	Height	IntDen	RawIntDen
488	1	C1-MAX_WT DIV1 neuron #8_all_1x1.nd2:WT DIV1 neuron #8_all_1x1_M...	42.169	122.892	84	255	30.933	43.2	20.267	16.8	5182.24	291501
640	2	C2-MAX_WT DIV1 neuron #8_all_1x1.nd2:WT DIV1 neuron #8_all_1x1_M...	42.169	68.573	14	255	30.933	43.2	20.267	16.8	2891.64	162655
405	3	C3-MAX_WT DIV1 neuron #8_all_1x1.nd2:WT DIV1 neuron #8_all_1x1_M...	42.169	70.056	3	142	30.933	43.2	20.267	16.8	2954.17	166172
640 Tracings
Image	Tracing	Cluster	Type	Label	Length [micron]	Mean Val [a.u.]	SD Val [a.u.]	Min Val [a.u.]	Max Val [a.u.]
C2-MAX_WT DIV1 neuron #8_all_1x1	N1	Default	Primary	Default	22.4	30.927	15.193	6	62
C2-MAX_WT DIV1 neuron #8_all_1x1	N2	Default	Primary	Default	9.484	20.339	10.938	4	46
C2-MAX_WT DIV1 neuron #8_all_1x1	N3	Default	Primary	Default	28.74	33.934	19.014	5	94
C2-MAX_WT DIV1 neuron #8_all_1x1	N4	Default	Primary	Default	31.571	39.869	16.339	11	89
640 Groups
Image	Cluster	Type	Count	Sum Len [micron]	Mean Len [micron]	SD Len [micron]	Min Len [micron]	Max Len [micron]	Mean Val [a.u.]	SD Val [a.u.]	Min Val [a.u.]	Max Val [a.u.]
C2-MAX_WT DIV1 neuron #8_all_1x1	All	All	4	92.195	23.049	9.822	9.484	31.571	34.088	17.46	4	94
Image 5
WT DIV1 neuron #10_all
Electroporation efficency by measuring GFP efficency with "Minimum" ROI (only covering soma)
		Label	Area	Mean	Min	Max	BX	BY	Width	Height	IntDen	RawIntDen
488	1	C1-MAX_WT DIV1 neuron #10_all_1x1.nd2:WT DIV1 neuron #10_all_1x1_...	82.613	147.189	96	255	23.6	33.6	15.6	12.933	12159.8	683988
640	2	C2-MAX_WT DIV1 neuron #10_all_1x1.nd2:WT DIV1 neuron #10_all_1x1_...	82.613	95.369	19	255	23.6	33.6	15.6	12.933	7878.77	443181
405	3	C3-MAX_WT DIV1 neuron #10_all_1x1.nd2:WT DIV1 neuron #10_all_1x1_...	82.613	45.305	3	122	23.6	33.6	15.6	12.933	3742.77	210531
640 Tracings
Image	Tracing	Cluster	Type	Label	Length [micron]	Mean Val [a.u.]	SD Val [a.u.]	Min Val [a.u.]	Max Val [a.u.]
C2-MAX_WT DIV1 neuron #10_all_1x1	N1	Default	Primary	Default	30.456	48.217	26.831	4	106
C2-MAX_WT DIV1 neuron #10_all_1x1	N2	Default	Primary	Default	55.186	52.687	37.744	2	133
C2-MAX_WT DIV1 neuron #10_all_1x1	N3	Default	Primary	Default	15.934	61.757	22.964	10	99
C2-MAX_WT DIV1 neuron #10_all_1x1	N4	Default	Primary	Default	16.214	50.372	21.345	21	130
C2-MAX_WT DIV1 neuron #10_all_1x1	N5	Default	Primary	Default	19.042	62.468	25.857	8	130
C2-MAX_WT DIV1 neuron #10_all_1x1	N6	Default	Primary	Default	17.923	58.96	24.748	13	109
640 Groups
Image	Cluster	Type	Count	Sum Len [micron]	Mean Len [micron]	SD Len [micron]	Min Len [micron]	Max Len [micron]	Mean Val [a.u.]	SD Val [a.u.]	Min Val [a.u.]	Max Val [a.u.]
C2-MAX_WT DIV1 neuron #10_all_1x1	All	All	6	154.755	25.793	15.376	15.934	55.186	54.302	30.411	2	133
Image 6
WT DIV1 neuron #12_all
Electroporation efficency by measuring GFP efficency with "Minimum" ROI (only covering soma)
		Label	Area	Mean	Min	Max	BX	BY	Width	Height	IntDen	RawIntDen
488	1	C1-MAX_WT DIV1 neuron #12_all_1x1.nd2:WT DIV1 neuron #12_all_1x1_...	77.547	127.738	90	255	11.467	9.733	34	39.6	9905.64	557192
640	2	C2-MAX_WT DIV1 neuron #12_all_1x1.nd2:WT DIV1 neuron #12_all_1x1_...	77.547	83.902	18	255	11.467	9.733	34	39.6	6506.29	365979
405	3	C3-MAX_WT DIV1 neuron #12_all_1x1.nd2:WT DIV1 neuron #12_all_1x1_...	77.547	42.179	3	146	11.467	9.733	34	39.6	3270.81	183983
640 Tracings
Image	Tracing	Cluster	Type	Label	Length [micron]	Mean Val [a.u.]	SD Val [a.u.]	Min Val [a.u.]	Max Val [a.u.]
C2-MAX_WT DIV1 neuron #12_all_1x1	N1	Default	Primary	Default	18.689	45.627	15.818	23	97
C2-MAX_WT DIV1 neuron #12_all_1x1	N2	Default	Primary	Default	14.292	46.49	15.589	16	93
C2-MAX_WT DIV1 neuron #12_all_1x1	N3	Default	Primary	Default	17.577	69.344	21.734	20	115
640 Groups
Image	Cluster	Type	Count	Sum Len [micron]	Mean Len [micron]	SD Len [micron]	Min Len [micron]	Max Len [micron]	Mean Val [a.u.]	SD Val [a.u.]	Min Val [a.u.]	Max Val [a.u.]
C2-MAX_WT DIV1 neuron #12_all_1x1	All	All	3	50.557	16.852	2.286	14.292	18.689	54.663	21.367	16	115
Image 7
WT DIV1 neuron #13_all
Electroporation efficency by measuring GFP efficency with "Minimum" ROI (only covering soma)
		Label	Area	Mean	Min	Max	BX	BY	Width	Height	IntDen	RawIntDen
488	1	C1-MAX_WT DIV1 neuron #13_all_1x2.nd2:WT DIV1 neuron #13_all_1x2_...	72.373	168.285	109	255	31.867	67.6	13.6	12.533	12179.4	685089
640	2	C2-MAX_WT DIV1 neuron #13_all_1x2.nd2:WT DIV1 neuron #13_all_1x2_...	72.373	91.673	17	255	31.867	67.6	13.6	12.533	6634.67	373200
405	3	C3-MAX_WT DIV1 neuron #13_all_1x2.nd2:WT DIV1 neuron #13_all_1x2_...	72.373	40.008	4	116	31.867	67.6	13.6	12.533	2895.52	162873
640 Tracings
Image	Tracing	Cluster	Type	Label	Length [micron]	Mean Val [a.u.]	SD Val [a.u.]	Min Val [a.u.]	Max Val [a.u.]
C2-MAX_WT DIV1 neuron #13_all_1x2	N1	Default	Primary	Default	50.535	38.143	27.404	5	137
C2-MAX_WT DIV1 neuron #13_all_1x2	N2	Default	Primary	Default	3.361	25.192	11.321	7	37
C2-MAX_WT DIV1 neuron #13_all_1x2	N3	Default	Primary	Default	25.59	52.462	27.654	2	96
C2-MAX_WT DIV1 neuron #13_all_1x2	N4	Default	Primary	Default	15.025	26.406	14.972	5	65
C2-MAX_WT DIV1 neuron #13_all_1x2	N5	Default	Primary	Default	36.606	63.938	39.67	7	153
C2-MAX_WT DIV1 neuron #13_all_1x2	N6	Default	Primary	Default	16.839	66.198	34.93	14	131
C2-MAX_WT DIV1 neuron #13_all_1x2	N7	Default	Secondary	Default	5.266	18.195	6.329	10	31
640 Groups
Image	Cluster	Type	Count	Sum Len [micron]	Mean Len [micron]	SD Len [micron]	Min Len [micron]	Max Len [micron]	Mean Val [a.u.]	SD Val [a.u.]	Min Val [a.u.]	Max Val [a.u.]
C2-MAX_WT DIV1 neuron #13_all_1x2	All	All	7	153.223	21.889	17.045	3.361	50.535	47.047	33.397	2	153
Image 8
WT DIV1 neuron #14_all
Electroporation efficency by measuring GFP efficency with "Minimum" ROI (only covering soma)
		Label	Area	Mean	Min	Max	BX	BY	Width	Height	IntDen	RawIntDen
488	1	C1-MAX_WT DIV1 neuron #14_all_2x1.nd2:WT DIV1 neuron #14_all_2x1_...	65.92	130.926	84	255	26.133	14.8	100.133	48.267	8630.65	485474
640	2	C2-MAX_WT DIV1 neuron #14_all_2x1.nd2:WT DIV1 neuron #14_all_2x1_...	65.92	19.675	2	50	26.133	14.8	100.133	48.267	1297	72956
405	3	C3-MAX_WT DIV1 neuron #14_all_2x1.nd2:WT DIV1 neuron #14_all_2x1_...	65.92	51.42	5	132	26.133	14.8	100.133	48.267	3389.64	190667
640 Tracings
Image	Tracing	Cluster	Type	Label	Length [micron]	Mean Val [a.u.]	SD Val [a.u.]	Min Val [a.u.]	Max Val [a.u.]
C2-MAX_WT DIV1 neuron #14_all_2x1	N1	Default	Primary	Default	16.508	8.629	3.748	1	17
C2-MAX_WT DIV1 neuron #14_all_2x1	N2	Default	Primary	Default	13.851	6.656	2.508	1	12
C2-MAX_WT DIV1 neuron #14_all_2x1	N3	Default	Primary	Default	53.986	7.809	2.646	2	16
C2-MAX_WT DIV1 neuron #14_all_2x1	N4	Default	Primary	Default	16.171	8.477	3.253	2	17
640 Groups
Image	Cluster	Type	Count	Sum Len [micron]	Mean Len [micron]	SD Len [micron]	Min Len [micron]	Max Len [micron]	Mean Val [a.u.]	SD Val [a.u.]	Min Val [a.u.]	Max Val [a.u.]
C2-MAX_WT DIV1 neuron #14_all_2x1	All	All	4	100.516	25.129	19.275	13.851	53.986	7.895	3	1	17
Image 9
WT DIV1 neuron #15_all
Electroporation efficency by measuring GFP efficency with "Minimum" ROI (only covering soma)
		Label	Area	Mean	Min	Max	BX	BY	Width	Height	IntDen	RawIntDen
488	1	C1-MAX_WT DIV1 neuron #15_all_1x1.nd2:WT DIV1 neuron #15_all_1x1_...	64.036	152.554	109	255	24.267	45.733	21.2	10.267	9768.89	549500
640	2	C2-MAX_WT DIV1 neuron #15_all_1x1.nd2:WT DIV1 neuron #15_all_1x1_...	64.036	64.271	11	191	24.267	45.733	21.2	10.267	4115.64	231505
405	3	C3-MAX_WT DIV1 neuron #15_all_1x1.nd2:WT DIV1 neuron #15_all_1x1_...	64.036	52.531	5	160	24.267	45.733	21.2	10.267	3363.86	189217
640 Tracings
Image	Tracing	Cluster	Type	Label	Length [micron]	Mean Val [a.u.]	SD Val [a.u.]	Min Val [a.u.]	Max Val [a.u.]
C2-MAX_WT DIV1 neuron #15_all_1x1	N1	Default	Primary	Default	35.952	15.411	17.366	1	57
C2-MAX_WT DIV1 neuron #15_all_1x1	N2	Default	Primary	Default	16.285	47.117	18.288	11	74
C2-MAX_WT DIV1 neuron #15_all_1x1	N3	Default	Primary	Default	54.443	11.537	8.678	2	41
640 Groups
Image	Cluster	Type	Count	Sum Len [micron]	Mean Len [micron]	SD Len [micron]	Min Len [micron]	Max Len [micron]	Mean Val [a.u.]	SD Val [a.u.]	Min Val [a.u.]	Max Val [a.u.]
C2-MAX_WT DIV1 neuron #15_all_1x1	All	All	3	106.68	35.56	19.082	16.285	54.443	18.365	18.618	1	74
Image 10
WT DIV1 neuron #16_all
Electroporation efficency by measuring GFP efficency with "Minimum" ROI (only covering soma)
		Label	Area	Mean	Min	Max	BX	BY	Width	Height	IntDen	RawIntDen
488	1	C1-MAX_WT DIV1 neuron #16_all_1x1.nd2:WT DIV1 neuron #16_all_1x1_...	66.4	170.027	117	255	32.667	45.867	10.8	9.467	11289.8	635050
640	2	C2-MAX_WT DIV1 neuron #16_all_1x1.nd2:WT DIV1 neuron #16_all_1x1_...	66.4	87.62	16	224	32.667	45.867	10.8	9.467	5817.99	327262
405	3	C3-MAX_WT DIV1 neuron #16_all_1x1.nd2:WT DIV1 neuron #16_all_1x1_...	66.4	36.288	4	86	32.667	45.867	10.8	9.467	2409.53	135536
640 Tracings
Image	Tracing	Cluster	Type	Label	Length [micron]	Mean Val [a.u.]	SD Val [a.u.]	Min Val [a.u.]	Max Val [a.u.]
C2-MAX_WT DIV1 neuron #16_all_1x1	N1	Default	Primary	Default	29.444	18.104	12.25	3	54
C2-MAX_WT DIV1 neuron #16_all_1x1	N2	Default	Primary	Default	16.975	19.649	11.817	4	50
C2-MAX_WT DIV1 neuron #16_all_1x1	N3	Default	Primary	Default	31.245	39.15	16.33	7	77
640 Groups
Image	Cluster	Type	Count	Sum Len [micron]	Mean Len [micron]	SD Len [micron]	Min Len [micron]	Max Len [micron]	Mean Val [a.u.]	SD Val [a.u.]	Min Val [a.u.]	Max Val [a.u.]
C2-MAX_WT DIV1 neuron #16_all_1x1	All	All	3	77.664	25.888	7.771	16.975	31.245	27.097	17.258	3	77
Image 11
WT DIV1 neuron #17_all
Electroporation efficency by measuring GFP efficency with "Minimum" ROI (only covering soma)
		Label	Area	Mean	Min	Max	BX	BY	Width	Height	IntDen	RawIntDen
488	1	C1-MAX_WT DIV1 neuron #17_all_1x1.nd2:WT DIV1 neuron #17_all_1x1_...	68.587	150.303	95	255	30.4	29.6	11.333	23.067	10308.8	579870
640	2	C2-MAX_WT DIV1 neuron #17_all_1x1.nd2:WT DIV1 neuron #17_all_1x1_...	68.587	58.473	15	128	30.4	29.6	11.333	23.067	4010.44	225587
405	3	C3-MAX_WT DIV1 neuron #17_all_1x1.nd2:WT DIV1 neuron #17_all_1x1_...	68.587	76.619	8	232	30.4	29.6	11.333	23.067	5255.08	295598
640 Tracings
Image	Tracing	Cluster	Type	Label	Length [micron]	Mean Val [a.u.]	SD Val [a.u.]	Min Val [a.u.]	Max Val [a.u.]
C2-MAX_WT DIV1 neuron #17_all_1x1	N1	Default	Primary	Default	9.861	11.014	5.394	2	23
C2-MAX_WT DIV1 neuron #17_all_1x1	N2	Default	Primary	Default	14.437	12.465	4.973	6	24
C2-MAX_WT DIV1 neuron #17_all_1x1	N3	Default	Primary	Default	12.28	32.703	7.527	17	49
C2-MAX_WT DIV1 neuron #17_all_1x1	N4	Default	Primary	Default	13.706	33.406	8.158	13	49
C2-MAX_WT DIV1 neuron #17_all_1x1	N5	Default	Primary	Default	10.848	29.432	12.662	5	46
640 Groups
Image	Cluster	Type	Count	Sum Len [micron]	Mean Len [micron]	SD Len [micron]	Min Len [micron]	Max Len [micron]	Mean Val [a.u.]	SD Val [a.u.]	Min Val [a.u.]	Max Val [a.u.]
C2-MAX_WT DIV1 neuron #17_all_1x1	All	All	5	61.131	12.226	1.909	9.861	14.437	24.316	12.79	2	49
Image 12
WT DIV1 neuron #18_all
Electroporation efficency by measuring GFP efficency with "Minimum" ROI (only covering soma)
		Label	Area	Mean	Min	Max	BX	BY	Width	Height	IntDen	RawIntDen
488	1	C1-MAX_WT DIV1 neuron #18_all_1x1.nd2:WT DIV1 neuron #18_all_1x1_...	61.796	165.603	109	255	35.333	26.933	10.667	12.667	10233.5	575636
640	2	C2-MAX_WT DIV1 neuron #18_all_1x1.nd2:WT DIV1 neuron #18_all_1x1_...	61.796	126.619	25	255	35.333	26.933	10.667	12.667	7824.52	440129
405	3	C3-MAX_WT DIV1 neuron #18_all_1x1.nd2:WT DIV1 neuron #18_all_1x1_...	61.796	69.963	5	176	35.333	26.933	10.667	12.667	4323.41	243192
640 Tracings
Image	Tracing	Cluster	Type	Label	Length [micron]	Mean Val [a.u.]	SD Val [a.u.]	Min Val [a.u.]	Max Val [a.u.]
C2-MAX_WT DIV1 neuron #18_all_1x1	N1	Default	Primary	Default	18.333	33.793	24.538	1	92
C2-MAX_WT DIV1 neuron #18_all_1x1	N2	Default	Primary	Default	9.6	18.845	8.244	4	33
C2-MAX_WT DIV1 neuron #18_all_1x1	N3	Default	Primary	Default	21.338	84.311	29.299	22	132
C2-MAX_WT DIV1 neuron #18_all_1x1	N4	Default	Primary	Default	33.287	67.706	34.238	8	139
C2-MAX_WT DIV1 neuron #18_all_1x1	N5	Default	Primary	Default	31.383	52.947	29.573	13	117
C2-MAX_WT DIV1 neuron #18_all_1x1	N6	Default	Secondary	Default	6.061	7.639	8.394	2	43
C2-MAX_WT DIV1 neuron #18_all_1x1	N7	Default	Secondary	Default	13.171	28.366	13.174	5	56
640 Groups
Image	Cluster	Type	Count	Sum Len [micron]	Mean Len [micron]	SD Len [micron]	Min Len [micron]	Max Len [micron]	Mean Val [a.u.]	SD Val [a.u.]	Min Val [a.u.]	Max Val [a.u.]
C2-MAX_WT DIV1 neuron #18_all_1x1	All	All	7	133.174	19.025	10.433	6.061	33.287	51.829	35.139	1	139
Image 13
WT DIV1 neuron #19_all
Electroporation efficency by measuring GFP efficency with "Minimum" ROI (only covering soma)
		Label	Area	Mean	Min	Max	BX	BY	Width	Height	IntDen	RawIntDen
488	1	C1-MAX_WT DIV1 neuron #19_all_2x1.nd2:WT DIV1 neuron #19_all_2x1_...	74.169	153.708	114	255	68.8	41.333	27.467	18	11400.3	641269
640	2	C2-MAX_WT DIV1 neuron #19_all_2x1.nd2:WT DIV1 neuron #19_all_2x1_...	74.169	81.29	24	242	68.8	41.333	27.467	18	6029.17	339141
405	3	C3-MAX_WT DIV1 neuron #19_all_2x1.nd2:WT DIV1 neuron #19_all_2x1_...	74.169	45.493	3	115	68.8	41.333	27.467	18	3374.17	189797
640 Tracings
Image	Tracing	Cluster	Type	Label	Length [micron]	Mean Val [a.u.]	SD Val [a.u.]	Min Val [a.u.]	Max Val [a.u.]
C2-MAX_WT DIV1 neuron #19_all_2x1	N1	Default	Primary	Default	24.611	28.967	8.46	11	49
C2-MAX_WT DIV1 neuron #19_all_2x1	N2	Default	Primary	Default	12.447	26.827	7.496	11	49
C2-MAX_WT DIV1 neuron #19_all_2x1	N3	Default	Primary	Default	14.47	48.736	21.928	7	105
C2-MAX_WT DIV1 neuron #19_all_2x1	N4	Default	Primary	Default	19.34	35.057	13.41	7	68
C2-MAX_WT DIV1 neuron #19_all_2x1	N5	Default	Primary	Default	34.025	38.136	22.845	7	104
C2-MAX_WT DIV1 neuron #19_all_2x1	N6	Default	Primary	Default	48.845	16.746	9.794	5	51
C2-MAX_WT DIV1 neuron #19_all_2x1	N7	Default	Primary	Default	34.747	29.436	19.121	6	93
C2-MAX_WT DIV1 neuron #19_all_2x1	N8	Default	Secondary	Default	4.452	23.871	8.119	10	38
640 Groups
Image	Cluster	Type	Count	Sum Len [micron]	Mean Len [micron]	SD Len [micron]	Min Len [micron]	Max Len [micron]	Mean Val [a.u.]	SD Val [a.u.]	Min Val [a.u.]	Max Val [a.u.]
C2-MAX_WT DIV1 neuron #19_all_2x1	All	All	8	192.936	24.117	14.45	4.452	48.845	29.29	18.253	5	105
Image 14
WT DIV1 neuron #20_all
Electroporation efficency by measuring GFP efficency with "Minimum" ROI (only covering soma)
		Label	Area	Mean	Min	Max	BX	BY	Width	Height	IntDen	RawIntDen
488	1	C1-MAX_WT DIV1 neuron #20_all_1x2.nd2:WT DIV1 neuron #20_all_1x2_...	129.938	125.177	84	255	0.8	6.4	36	89.733	16265.3	914922
640	2	C2-MAX_WT DIV1 neuron #20_all_1x2.nd2:WT DIV1 neuron #20_all_1x2_...	129.938	44.208	6	156	0.8	6.4	36	89.733	5744.23	323113
405	3	C3-MAX_WT DIV1 neuron #20_all_1x2.nd2:WT DIV1 neuron #20_all_1x2_...	129.938	44.029	3	114	0.8	6.4	36	89.733	5721.08	321811
640 Tracings
Image	Tracing	Cluster	Type	Label	Length [micron]	Mean Val [a.u.]	SD Val [a.u.]	Min Val [a.u.]	Max Val [a.u.]
C2-MAX_WT DIV1 neuron #20_all_1x2	N1	Default	Primary	Default	17.532	12.887	4.909	2	24
C2-MAX_WT DIV1 neuron #20_all_1x2	N2	Default	Primary	Default	48.513	22.032	9.441	7	46
C2-MAX_WT DIV1 neuron #20_all_1x2	N3	Default	Primary	Default	48.909	25.711	10.328	5	48
C2-MAX_WT DIV1 neuron #20_all_1x2	N4	Default	Primary	Default	14.384	17.5	8.452	5	37
640 Groups
Image	Cluster	Type	Count	Sum Len [micron]	Mean Len [micron]	SD Len [micron]	Min Len [micron]	Max Len [micron]	Mean Val [a.u.]	SD Val [a.u.]	Min Val [a.u.]	Max Val [a.u.]
C2-MAX_WT DIV1 neuron #20_all_1x2	All	All	4	129.338	32.335	18.954	14.384	48.909	21.678	10.13	2	48

## Sheet: V409I DIV1 (2)
V409 neuron prep_09.21.2020
* all .nd2 images were converted into an 8-bit grayscale .tiff in order to be analyzed in NeuronJ (imageJ plugin) *
Scale is set at 7.5µm/pixel
Image 1
VI DIV1 neuron #2_all
Electroporation efficency by measuring GFP efficency with "Minimum" ROI (only covering soma)
		Label	Area	Mean	Min	Max	BX	BY	Width	Height	IntDen	RawIntDen
488	1	C1-MAX_VI DIV1 neuron #2_all_1x2.nd2:VI DIV1 neuron #2_all_1x2_M...	69.689	155.159	107	255	15.867	64.4	14.933	44.267	10812.9	608225
640	2	C2-MAX_VI DIV1 neuron #2_all_1x2.nd2:VI DIV1 neuron #2_all_1x2_M...	69.689	88.198	21	255	15.867	64.4	14.933	44.267	6146.45	345738
405	3	C3-MAX_VI DIV1 neuron #2_all_1x2.nd2:VI DIV1 neuron #2_all_1x2_M...	69.689	45.609	4	121	15.867	64.4	14.933	44.267	3178.42	178786
640 Tracings
Image	Tracing	Cluster	Type	Label	Length [micron]	Mean Val [a.u.]	SD Val [a.u.]	Min Val [a.u.]	Max Val [a.u.]
C2-MAX_VI DIV1 neuron #2_all_1x2	N1	Default	Primary	Default	26.418	25.398	22.885	1	93
C2-MAX_VI DIV1 neuron #2_all_1x2	N2	Default	Primary	Default	11.709	11.079	3.629	5	22
C2-MAX_VI DIV1 neuron #2_all_1x2	N3	Default	Primary	Default	6.771	30.137	11.141	12	51
C2-MAX_VI DIV1 neuron #2_all_1x2	N4	Default	Primary	Default	12.234	16.066	6.357	5	39
C2-MAX_VI DIV1 neuron #2_all_1x2	N5	Default	Primary	Default	40.192	20.784	12.777	4	75
C2-MAX_VI DIV1 neuron #2_all_1x2	N6	Default	Secondary	Default	12.093	12.872	7.639	3	34
C2-MAX_VI DIV1 neuron #2_all_1x2	N7	Default	Secondary	Default	10.214	12.817	7.033	1	26
640 Groups
Image	Cluster	Type	Count	Sum Len [micron]	Mean Len [micron]	SD Len [micron]	Min Len [micron]	Max Len [micron]	Mean Val [a.u.]	SD Val [a.u.]	Min Val [a.u.]	Max Val [a.u.]
C2-MAX_VI DIV1 neuron #2_all_1x2	All	All	7	119.63	17.09	11.916	6.771	40.192	19.438	14.755	1	93
Image 2
VI DIV1 neuron #3_all
Electroporation efficency by measuring GFP efficency with "Minimum" ROI (only covering soma)
		Label	Area	Mean	Min	Max	BX	BY	Width	Height	IntDen	RawIntDen
488	1	C1-MAX_VI DIV1 neuron #3_all_1x2.nd2:VI DIV1 neuron #3_all_1x2_M...	69.867	146.233	86	255	7.733	41.867	26.933	38.133	10216.8	574696
640	2	C2-MAX_VI DIV1 neuron #3_all_1x2.nd2:VI DIV1 neuron #3_all_1x2_M...	69.867	98.821	6	255	7.733	41.867	26.933	38.133	6904.32	388368
405	3	C3-MAX_VI DIV1 neuron #3_all_1x2.nd2:VI DIV1 neuron #3_all_1x2_M...	69.867	40.853	3	146	7.733	41.867	26.933	38.133	2854.29	160554
640 Tracings
Image	Tracing	Cluster	Type	Label	Length [micron]	Mean Val [a.u.]	SD Val [a.u.]	Min Val [a.u.]	Max Val [a.u.]
C2-MAX_VI DIV1 neuron #3_all_1x2	N1	Default	Primary	Default	44.859	49.343	25.497	6	116
C2-MAX_VI DIV1 neuron #3_all_1x2	N2	Default	Primary	Default	24.805	33.608	18.02	5	75
C2-MAX_VI DIV1 neuron #3_all_1x2	N3	Default	Primary	Default	14.27	25.552	11.042	4	49
C2-MAX_VI DIV1 neuron #3_all_1x2	N4	Default	Primary	Default	13.958	45.396	25.086	1	86
C2-MAX_VI DIV1 neuron #3_all_1x2	N5	Default	Primary	Default	21.937	26.241	12.829	2	66
C2-MAX_VI DIV1 neuron #3_all_1x2	N6	Default	Secondary	Default	13.749	17.506	10.286	2	40
C2-MAX_VI DIV1 neuron #3_all_1x2	N7	Default	Secondary	Default	7.488	18.022	13.621	4	58
640 Groups
Image	Cluster	Type	Count	Sum Len [micron]	Mean Len [micron]	SD Len [micron]	Min Len [micron]	Max Len [micron]	Mean Val [a.u.]	SD Val [a.u.]	Min Val [a.u.]	Max Val [a.u.]
C2-MAX_VI DIV1 neuron #3_all_1x2	All	All	7	141.068	20.153	12.313	7.488	44.859	36.063	23.079	1	116
Image 3
VI DIV1 neuron #4_all
Electroporation efficency by measuring GFP efficency with "Minimum" ROI (only covering soma)
		Label	Area	Mean	Min	Max	BX	BY	Width	Height	IntDen	RawIntDen
488	1	C1-MAX_VI DIV1 neuron #4_all_1x1.nd2:VI DIV1 neuron #4_all_1x1_M...	81.173	158.285	111	255	38.133	27.067	11.733	12.133	12848.5	722728
640	2	C2-MAX_VI DIV1 neuron #4_all_1x1.nd2:VI DIV1 neuron #4_all_1x1_M...	81.173	123.571	22	255	38.133	27.067	11.733	12.133	10030.7	564227
405	3	C3-MAX_VI DIV1 neuron #4_all_1x1.nd2:VI DIV1 neuron #4_all_1x1_M...	81.173	37.889	3	98	38.133	27.067	11.733	12.133	3075.59	173002
640 Tracings
Image	Tracing	Cluster	Type	Label	Length [micron]	Mean Val [a.u.]	SD Val [a.u.]	Min Val [a.u.]	Max Val [a.u.]
C2-MAX_VI DIV1 neuron #4_all_1x1	N1	Default	Primary	Default	22.279	30.206	16.877	5	67
C2-MAX_VI DIV1 neuron #4_all_1x1	N2	Default	Primary	Default	9.277	37.286	24.136	9	94
C2-MAX_VI DIV1 neuron #4_all_1x1	N3	Default	Primary	Default	18.108	62.728	30.002	17	133
C2-MAX_VI DIV1 neuron #4_all_1x1	N4	Default	Primary	Default	39.974	49.432	23.356	11	103
640 Groups
Image	Cluster	Type	Count	Sum Len [micron]	Mean Len [micron]	SD Len [micron]	Min Len [micron]	Max Len [micron]	Mean Val [a.u.]	SD Val [a.u.]	Min Val [a.u.]	Max Val [a.u.]
C2-MAX_VI DIV1 neuron #4_all_1x1	All	All	4	89.637	22.409	12.903	9.277	39.974	46.929	26.468	5	133
Image 4
VI DIV1 neuron #5_all
Electroporation efficency by measuring GFP efficency with "Minimum" ROI (only covering soma)
		Label	Area	Mean	Min	Max	BX	BY	Width	Height	IntDen	RawIntDen
488	1	C1-MAX_VI DIV1 neuron #5_all_1x1.nd2:VI DIV1 neuron #5_all_1x1_M...	59.627	150.647	92	255	18.533	36.4	43.333	7.733	8982.58	505270
640	2	C2-MAX_VI DIV1 neuron #5_all_1x1.nd2:VI DIV1 neuron #5_all_1x1_M...	59.627	91.315	11	255	18.533	36.4	43.333	7.733	5444.82	306271
405	3	C3-MAX_VI DIV1 neuron #5_all_1x1.nd2:VI DIV1 neuron #5_all_1x1_M...	59.627	72.507	4	163	18.533	36.4	43.333	7.733	4323.38	243190
640 Tracings
Image	Tracing	Cluster	Type	Label	Length [micron]	Mean Val [a.u.]	SD Val [a.u.]	Min Val [a.u.]	Max Val [a.u.]
C2-MAX_VI DIV1 neuron #5_all_1x1	N1	Default	Primary	Default	37.267	76.031	16.43	25	109
C2-MAX_VI DIV1 neuron #5_all_1x1	N2	Default	Primary	Default	8.179	21.786	7.712	7	37
C2-MAX_VI DIV1 neuron #5_all_1x1	N3	Default	Primary	Default	17.504	39.153	18.135	7	83
C2-MAX_VI DIV1 neuron #5_all_1x1	N4	Default	Primary	Default	9.59	20.364	10.328	5	49
640 Groups
Image	Cluster	Type	Count	Sum Len [micron]	Mean Len [micron]	SD Len [micron]	Min Len [micron]	Max Len [micron]	Mean Val [a.u.]	SD Val [a.u.]	Min Val [a.u.]	Max Val [a.u.]
C2-MAX_VI DIV1 neuron #5_all_1x1	All	All	4	72.54	18.135	13.399	8.179	37.267	53.574	28.318	5	109
Image 5
VI DIV1 neuron #6_all
Electroporation efficency by measuring GFP efficency with "Minimum" ROI (only covering soma)
		Label	Area	Mean	Min	Max	BX	BY	Width	Height	IntDen	RawIntDen
488	1	C1-MAX_VI DIV1 neuron #6_all_1x1.nd2:VI DIV1 neuron #6_all_1x1_M...	78.649	144.467	100	255	26.933	39.867	22.267	10.8	11362.2	639123
640	2	C2-MAX_VI DIV1 neuron #6_all_1x1.nd2:VI DIV1 neuron #6_all_1x1_M...	78.649	79.509	24	242	26.933	39.867	22.267	10.8	6253.26	351746
405	3	C3-MAX_VI DIV1 neuron #6_all_1x1.nd2:VI DIV1 neuron #6_all_1x1_M...	78.649	47.14	2	142	26.933	39.867	22.267	10.8	3707.5	208547
640 Tracings
Image	Tracing	Cluster	Type	Label	Length [micron]	Mean Val [a.u.]	SD Val [a.u.]	Min Val [a.u.]	Max Val [a.u.]
C2-MAX_VI DIV1 neuron #6_all_1x1	N1	Default	Primary	Default	22.534	42.359	20.541	6	104
C2-MAX_VI DIV1 neuron #6_all_1x1	N2	Default	Primary	Default	10.333	29.444	8.328	12	53
C2-MAX_VI DIV1 neuron #6_all_1x1	N3	Default	Primary	Default	16.786	32.236	20.081	8	97
C2-MAX_VI DIV1 neuron #6_all_1x1	N4	Default	Primary	Default	10.12	40.042	29.701	3	101
C2-MAX_VI DIV1 neuron #6_all_1x1	N5	Default	Primary	Default	38.243	28.274	18.267	2	77
640 Groups
Image	Cluster	Type	Count	Sum Len [micron]	Mean Len [micron]	SD Len [micron]	Min Len [micron]	Max Len [micron]	Mean Val [a.u.]	SD Val [a.u.]	Min Val [a.u.]	Max Val [a.u.]
C2-MAX_VI DIV1 neuron #6_all_1x1	All	All	5	98.016	19.603	11.617	10.12	38.243	33.69	20.635	2	104
Image 6
VI DIV1 neuron #7_all
Electroporation efficency by measuring GFP efficency with "Minimum" ROI (only covering soma)
		Label	Area	Mean	Min	Max	BX	BY	Width	Height	IntDen	RawIntDen
488	1	C1-MAX_VI DIV1 neuron #7_all_1x1.nd2:VI DIV1 neuron #7_all_1x1_M...	77.902	156.214	106	255	19.467	30.8	22.267	11.2	12169.4	684530
640	2	C2-MAX_VI DIV1 neuron #7_all_1x1.nd2:VI DIV1 neuron #7_all_1x1_M...	77.902	91.331	23	255	19.467	30.8	22.267	11.2	7114.88	400212
405	3	C3-MAX_VI DIV1 neuron #7_all_1x1.nd2:VI DIV1 neuron #7_all_1x1_M...	77.902	42.264	3	135	19.467	30.8	22.267	11.2	3292.5	185203
640 Tracings
Image	Tracing	Cluster	Type	Label	Length [micron]	Mean Val [a.u.]	SD Val [a.u.]	Min Val [a.u.]	Max Val [a.u.]
C2-MAX_VI DIV1 neuron #7_all_1x1	N1	Default	Primary	Default	8.622	24.561	8.222	7	46
C2-MAX_VI DIV1 neuron #7_all_1x1	N2	Default	Primary	Default	13.118	19.132	7.256	5	34
C2-MAX_VI DIV1 neuron #7_all_1x1	N3	Default	Primary	Default	11.407	14.233	6.585	2	32
C2-MAX_VI DIV1 neuron #7_all_1x1	N4	Default	Primary	Default	14.491	22.312	14.723	7	61
C2-MAX_VI DIV1 neuron #7_all_1x1	N5	Default	Primary	Default	10.665	22.775	10.057	8	58
C2-MAX_VI DIV1 neuron #7_all_1x1	N6	Default	Primary	Default	17.151	40.427	12.797	10	65
C2-MAX_VI DIV1 neuron #7_all_1x1	N7	Default	Primary	Default	6.534	31.512	13.331	7	56
640 Groups
Image	Cluster	Type	Count	Sum Len [micron]	Mean Len [micron]	SD Len [micron]	Min Len [micron]	Max Len [micron]	Mean Val [a.u.]	SD Val [a.u.]	Min Val [a.u.]	Max Val [a.u.]
C2-MAX_VI DIV1 neuron #7_all_1x1	All	All	7	81.988	11.713	3.578	6.534	17.151	25.831	14.209	2	65
Image 7
VI DIV1 neuron #9_all
Electroporation efficency by measuring GFP efficency with "Minimum" ROI (only covering soma)
		Label	Area	Mean	Min	Max	BX	BY	Width	Height	IntDen	RawIntDen
488	1	C1-MAX_VI DIV1 neuron #9_all_1x1.nd2:VI DIV1 neuron #9_all_1x1_M...	86.916	153.179	102	255	30.8	22	14.533	22.267	13313.6	748891
640	2	C2-MAX_VI DIV1 neuron #9_all_1x1.nd2:VI DIV1 neuron #9_all_1x1_M...	86.916	127.98	21	253	30.8	22	14.533	22.267	11123.4	625694
405	3	C3-MAX_VI DIV1 neuron #9_all_1x1.nd2:VI DIV1 neuron #9_all_1x1_M...	86.916	46.201	3	128	30.8	22	14.533	22.267	4015.61	225878
640 Tracings
Image	Tracing	Cluster	Type	Label	Length [micron]	Mean Val [a.u.]	SD Val [a.u.]	Min Val [a.u.]	Max Val [a.u.]
C2-MAX_VI DIV1 neuron #9_all_1x1	N1	Default	Primary	Default	16.454	37	15.153	6	70
C2-MAX_VI DIV1 neuron #9_all_1x1	N2	Default	Primary	Default	11.606	38.671	20.91	4	77
C2-MAX_VI DIV1 neuron #9_all_1x1	N3	Default	Primary	Default	7.049	41.588	18	7	71
C2-MAX_VI DIV1 neuron #9_all_1x1	N4	Default	Primary	Default	9.914	44.658	21.623	4	77
C2-MAX_VI DIV1 neuron #9_all_1x1	N5	Default	Primary	Default	4.725	48.583	13.057	28	79
C2-MAX_VI DIV1 neuron #9_all_1x1	N6	Default	Primary	Default	25.757	95.511	43.411	14	153
C2-MAX_VI DIV1 neuron #9_all_1x1	N7	Default	Primary	Default	20.112	68.192	29.634	13	146
C2-MAX_VI DIV1 neuron #9_all_1x1	N8	Default	Primary	Default	9.484	49.915	15.637	12	79
C2-MAX_VI DIV1 neuron #9_all_1x1	N9	Default	Primary	Default	9.004	62.076	18.521	16	91
C2-MAX_VI DIV1 neuron #9_all_1x1	N10	Default	Secondary	Default	4.656	49.452	17.948	13	74
C2-MAX_VI DIV1 neuron #9_all_1x1	N11	Default	Secondary	Default	10.633	23.099	11.879	4	43
640 Groups
Image	Cluster	Type	Count	Sum Len [micron]	Mean Len [micron]	SD Len [micron]	Min Len [micron]	Max Len [micron]	Mean Val [a.u.]	SD Val [a.u.]	Min Val [a.u.]	Max Val [a.u.]
C2-MAX_VI DIV1 neuron #9_all_1x1	All	All	11	129.396	11.763	6.537	4.656	25.757	57.436	35.014	4	153
Image 8
VI DIV1 neuron #10_all
Electroporation efficency by measuring GFP efficency with "Minimum" ROI (only covering soma)
		Label	Area	Mean	Min	Max	BX	BY	Width	Height	IntDen	RawIntDen
488	1	C1-MAX_VI DIV1 neuron #10_all_1x1.nd2:VI DIV1 neuron #10_all_1x1_...	45.387	152.036	97	255	33.067	30.4	9.333	7.067	6900.41	388148
640	2	C2-MAX_VI DIV1 neuron #10_all_1x1.nd2:VI DIV1 neuron #10_all_1x1_...	45.387	125.305	15	255	33.067	30.4	9.333	7.067	5687.16	319903
405	3	C3-MAX_VI DIV1 neuron #10_all_1x1.nd2:VI DIV1 neuron #10_all_1x1_...	45.387	67.981	3	144	33.067	30.4	9.333	7.067	3085.44	173556
640 Tracings
Image	Tracing	Cluster	Type	Label	Length [micron]	Mean Val [a.u.]	SD Val [a.u.]	Min Val [a.u.]	Max Val [a.u.]
C2-MAX_VI DIV1 neuron #10_all_1x1	N1	Default	Primary	Default	8.489	41.377	18.596	11	74
C2-MAX_VI DIV1 neuron #10_all_1x1	N2	Default	Primary	Default	17.668	46.325	19.773	7	83
C2-MAX_VI DIV1 neuron #10_all_1x1	N3	Default	Primary	Default	13.494	49.167	17.155	10	83
C2-MAX_VI DIV1 neuron #10_all_1x1	N4	Default	Primary	Default	26.204	46.514	30.624	8	126
C2-MAX_VI DIV1 neuron #10_all_1x1	N5	Default	Secondary	Default	16.9	25.901	14.23	4	100
C2-MAX_VI DIV1 neuron #10_all_1x1	N6	Default	Secondary	Default	5	15.516	8.85	4	44
640 Groups
Image	Cluster	Type	Count	Sum Len [micron]	Mean Len [micron]	SD Len [micron]	Min Len [micron]	Max Len [micron]	Mean Val [a.u.]	SD Val [a.u.]	Min Val [a.u.]	Max Val [a.u.]
C2-MAX_VI DIV1 neuron #10_all_1x1	All	All	6	87.755	14.626	7.485	5	26.204	41.017	24.119	4	126
Image 9
VI DIV1 neuron #11_all
Electroporation efficency by measuring GFP efficency with "Minimum" ROI (only covering soma)
		Label	Area	Mean	Min	Max	BX	BY	Width	Height	IntDen	RawIntDen
488	1	C1-MAX_VI DIV1 neuron #11_all_1x1.nd2:VI DIV1 neuron #11_all_1x1_...	68	147.09	108	255	26.4	28.4	15.6	14.933	10002.1	562619
640	2	C2-MAX_VI DIV1 neuron #11_all_1x1.nd2:VI DIV1 neuron #11_all_1x1_...	68	94.402	12	255	26.4	28.4	15.6	14.933	6419.32	361087
405	3	C3-MAX_VI DIV1 neuron #11_all_1x1.nd2:VI DIV1 neuron #11_all_1x1_...	68	47.772	4	158	26.4	28.4	15.6	14.933	3248.46	182726
640 Tracings
Image	Tracing	Cluster	Type	Label	Length [micron]	Mean Val [a.u.]	SD Val [a.u.]	Min Val [a.u.]	Max Val [a.u.]
C2-MAX_VI DIV1 neuron #11_all_1x1	N1	Default	Primary	Default	11.284	14.553	5.784	6	29
C2-MAX_VI DIV1 neuron #11_all_1x1	N2	Default	Primary	Default	23.706	26.955	10.016	10	54
C2-MAX_VI DIV1 neuron #11_all_1x1	N3	Default	Primary	Default	23.193	23.879	17.773	5	73
C2-MAX_VI DIV1 neuron #11_all_1x1	N4	Default	Primary	Default	20.744	35.25	18.012	7	104
C2-MAX_VI DIV1 neuron #11_all_1x1	N5	Default	Primary	Default	17.833	35.595	17.452	4	67
C2-MAX_VI DIV1 neuron #11_all_1x1	N6	Default	Primary	Default	11.768	21.686	8.136	8	40
C2-MAX_VI DIV1 neuron #11_all_1x1	N7	Default	Primary	Default	7.131	27.02	11.138	9	47
640 Groups
Image	Cluster	Type	Count	Sum Len [micron]	Mean Len [micron]	SD Len [micron]	Min Len [micron]	Max Len [micron]	Mean Val [a.u.]	SD Val [a.u.]	Min Val [a.u.]	Max Val [a.u.]
C2-MAX_VI DIV1 neuron #11_all_1x1	All	All	7	115.658	16.523	6.505	7.131	23.706	27.3	15.617	4	104
Image 10
VI DIV1 neuron #12_all
Electroporation efficency by measuring GFP efficency with "Minimum" ROI (only covering soma)
		Label	Area	Mean	Min	Max	BX	BY	Width	Height	IntDen	RawIntDen
488	1	C1-MAX_VI DIV1 neuron #12_all_1x1.nd2:VI DIV1 neuron #12_all_1x1_...	98.56	159.244	95	255	28.667	30.933	12.267	14.933	15695.1	882848
640	2	C2-MAX_VI DIV1 neuron #12_all_1x1.nd2:VI DIV1 neuron #12_all_1x1_...	98.56	150.109	29	255	28.667	30.933	12.267	14.933	14794.7	832203
405	3	C3-MAX_VI DIV1 neuron #12_all_1x1.nd2:VI DIV1 neuron #12_all_1x1_...	98.56	47.192	4	146	28.667	30.933	12.267	14.933	4651.25	261633
640 Tracings
Image	Tracing	Cluster	Type	Label	Length [micron]	Mean Val [a.u.]	SD Val [a.u.]	Min Val [a.u.]	Max Val [a.u.]
C2-MAX_VI DIV1 neuron #12_all_1x1	N1	Default	Primary	Default	33.167	64.068	40.793	7	143
C2-MAX_VI DIV1 neuron #12_all_1x1	N2	Default	Primary	Default	15.138	38.625	26.856	4	95
C2-MAX_VI DIV1 neuron #12_all_1x1	N3	Default	Primary	Default	11.277	42.197	17.364	11	81
C2-MAX_VI DIV1 neuron #12_all_1x1	N4	Default	Primary	Default	15.506	24.767	25.224	1	87
C2-MAX_VI DIV1 neuron #12_all_1x1	N5	Default	Primary	Default	10.758	58.282	36.564	14	149
C2-MAX_VI DIV1 neuron #12_all_1x1	N6	Default	Secondary	Default	7.849	25.161	23.497	6	115
640 Groups
Image	Cluster	Type	Count	Sum Len [micron]	Mean Len [micron]	SD Len [micron]	Min Len [micron]	Max Len [micron]	Mean Val [a.u.]	SD Val [a.u.]	Min Val [a.u.]	Max Val [a.u.]
C2-MAX_VI DIV1 neuron #12_all_1x1	All	All	6	93.695	15.616	9.067	7.849	33.167	47.845	36.262	1	149
Image 11
VI DIV1 neuron #13_all
Electroporation efficency by measuring GFP efficency with "Minimum" ROI (only covering soma)
		Label	Area	Mean	Min	Max	BX	BY	Width	Height	IntDen	RawIntDen
488	1	C1-MAX_VI DIV1 neuron #13_all_1x1.nd2:VI DIV1 neuron #13_all_1x1_...	91.076	157.02	98	255	17.467	24	20.8	11.867	14300.6	804411
640	2	C2-MAX_VI DIV1 neuron #13_all_1x1.nd2:VI DIV1 neuron #13_all_1x1_...	91.076	124.718	22	255	17.467	24	20.8	11.867	11358.8	638932
405	3	C3-MAX_VI DIV1 neuron #13_all_1x1.nd2:VI DIV1 neuron #13_all_1x1_...	91.076	55.812	6	145	17.467	24	20.8	11.867	5083.11	285925
640 Tracings
Image	Tracing	Cluster	Type	Label	Length [micron]	Mean Val [a.u.]	SD Val [a.u.]	Min Val [a.u.]	Max Val [a.u.]
C2-MAX_VI DIV1 neuron #13_all_1x1	N1	Default	Primary	Default	24.301	51.055	33.2	9	128
C2-MAX_VI DIV1 neuron #13_all_1x1	N2	Default	Primary	Default	27.059	30.926	17.058	4	80
C2-MAX_VI DIV1 neuron #13_all_1x1	N3	Default	Primary	Default	23.659	65.234	31.062	20	125
640 Groups
Image	Cluster	Type	Count	Sum Len [micron]	Mean Len [micron]	SD Len [micron]	Min Len [micron]	Max Len [micron]	Mean Val [a.u.]	SD Val [a.u.]	Min Val [a.u.]	Max Val [a.u.]
C2-MAX_VI DIV1 neuron #13_all_1x1	All	All	3	75.019	25.006	1.806	23.659	27.059	48.938	31.311	4	128
Image 12
VI DIV1 neuron #14_all
Electroporation efficency by measuring GFP efficency with "Minimum" ROI (only covering soma)
		Label	Area	Mean	Min	Max	BX	BY	Width	Height	IntDen	RawIntDen
488	1	C1-MAX_VI DIV1 neuron #14_all_1x2.nd2:VI DIV1 neuron #14_all_1x2_...	81.582	140.511	102	255	29.6	52.267	12.8	31.867	11463.2	644806
640	2	C2-MAX_VI DIV1 neuron #14_all_1x2.nd2:VI DIV1 neuron #14_all_1x2_...	81.582	130.059	60	255	29.6	52.267	12.8	31.867	10610.5	596841
405	3	C3-MAX_VI DIV1 neuron #14_all_1x2.nd2:VI DIV1 neuron #14_all_1x2_...	81.582	44.476	3	141	29.6	52.267	12.8	31.867	3628.48	204102
640 Tracings
Image	Tracing	Cluster	Type	Label	Length [micron]	Mean Val [a.u.]	SD Val [a.u.]	Min Val [a.u.]	Max Val [a.u.]
C2-MAX_VI DIV1 neuron #14_all_1x2	N1	Default	Primary	Default	47.913	42.551	19.699	6	89
C2-MAX_VI DIV1 neuron #14_all_1x2	N2	Default	Primary	Default	13.395	24.242	10.739	5	53
C2-MAX_VI DIV1 neuron #14_all_1x2	N3	Default	Primary	Default	36.534	51.276	27.337	2	103
C2-MAX_VI DIV1 neuron #14_all_1x2	N4	Default	Primary	Default	18.116	15.824	7.589	2	37
640 Groups
Image	Cluster	Type	Count	Sum Len [micron]	Mean Len [micron]	SD Len [micron]	Min Len [micron]	Max Len [micron]	Mean Val [a.u.]	SD Val [a.u.]	Min Val [a.u.]	Max Val [a.u.]
C2-MAX_VI DIV1 neuron #14_all_1x2	All	All	4	115.958	28.99	16.088	13.395	47.913	38.283	23.861	2	103
Image 13
VI DIV1 neuron #15_all
Electroporation efficency by measuring GFP efficency with "Minimum" ROI (only covering soma)
		Label	Area	Mean	Min	Max	BX	BY	Width	Height	IntDen	RawIntDen
488	1	C1-MAX_VI DIV1 neuron #15_all_1x1.nd2:VI DIV1 neuron #15_all_1x1_...	62.684	127.522	83	255	34.8	20.8	18.267	23.067	7993.64	449642
640	2	C2-MAX_VI DIV1 neuron #15_all_1x1.nd2:VI DIV1 neuron #15_all_1x1_...	62.684	84.444	12	255	34.8	20.8	18.267	23.067	5293.3	297748
405	3	C3-MAX_VI DIV1 neuron #15_all_1x1.nd2:VI DIV1 neuron #15_all_1x1_...	62.684	57.188	3	158	34.8	20.8	18.267	23.067	3584.78	201644
640 Tracings
Image	Tracing	Cluster	Type	Label	Length [micron]	Mean Val [a.u.]	SD Val [a.u.]	Min Val [a.u.]	Max Val [a.u.]
C2-MAX_VI DIV1 neuron #15_all_1x1	N1	Default	Primary	Default	15.346	33.604	13.017	8	62
C2-MAX_VI DIV1 neuron #15_all_1x1	N2	Default	Primary	Default	12.016	30.337	10.474	9	52
C2-MAX_VI DIV1 neuron #15_all_1x1	N3	Default	Primary	Default	15.831	36.034	14.332	7	59
640 Groups
Image	Cluster	Type	Count	Sum Len [micron]	Mean Len [micron]	SD Len [micron]	Min Len [micron]	Max Len [micron]	Mean Val [a.u.]	SD Val [a.u.]	Min Val [a.u.]	Max Val [a.u.]
C2-MAX_VI DIV1 neuron #15_all_1x1	All	All	3	43.194	14.398	2.077	12.016	15.831	33.607	13.057	7	62
Image 14
VI DIV1 neuron #16_all
Electroporation efficency by measuring GFP efficency with "Minimum" ROI (only covering soma)
		Label	Area	Mean	Min	Max	BX	BY	Width	Height	IntDen	RawIntDen
488	1	C1-MAX_VI DIV1 neuron #16_all_2x1.nd2:VI DIV1 neuron #16_all_2x1_...	70.756	158.241	104	255	69.733	24	15.467	14	11196.4	629799
640	2	C2-MAX_VI DIV1 neuron #16_all_2x1.nd2:VI DIV1 neuron #16_all_2x1_...	70.756	91.283	20	255	69.733	24	15.467	14	6458.76	363305
405	3	C3-MAX_VI DIV1 neuron #16_all_2x1.nd2:VI DIV1 neuron #16_all_2x1_...	70.756	50.006	3	128	69.733	24	15.467	14	3538.22	199025
640 Tracings
Image	Tracing	Cluster	Type	Label	Length [micron]	Mean Val [a.u.]	SD Val [a.u.]	Min Val [a.u.]	Max Val [a.u.]
C2-MAX_VI DIV1 neuron #16_all_2x1	N1	Default	Primary	Default	14.236	36.615	13.632	10	59
C2-MAX_VI DIV1 neuron #16_all_2x1	N2	Default	Primary	Default	14.242	21.156	12.373	4	50
C2-MAX_VI DIV1 neuron #16_all_2x1	N3	Default	Primary	Default	15.748	35.975	17.288	5	67
C2-MAX_VI DIV1 neuron #16_all_2x1	N4	Default	Primary	Default	17.787	26.349	26.839	2	80
C2-MAX_VI DIV1 neuron #16_all_2x1	N5	Default	Primary	Default	12.391	23.674	10.223	5	49
C2-MAX_VI DIV1 neuron #16_all_2x1	N6	Default	Primary	Default	59.485	18.715	13.916	3	70
C2-MAX_VI DIV1 neuron #16_all_2x1	N7	Default	Primary	Default	14.818	42.736	18.194	7	79
C2-MAX_VI DIV1 neuron #16_all_2x1	N8	Default	Secondary	Default	4.319	11.129	4.097	4	21
640 Groups
Image	Cluster	Type	Count	Sum Len [micron]	Mean Len [micron]	SD Len [micron]	Min Len [micron]	Max Len [micron]	Mean Val [a.u.]	SD Val [a.u.]	Min Val [a.u.]	Max Val [a.u.]
C2-MAX_VI DIV1 neuron #16_all_2x1	All	All	8	153.026	19.128	16.788	4.319	59.485	25.78	18.193	2	80
Image 15
VI DIV1 neuron #17_all
Electroporation efficency by measuring GFP efficency with "Minimum" ROI (only covering soma)
		Label	Area	Mean	Min	Max	BX	BY	Width	Height	IntDen	RawIntDen
488	1	C1-MAX_VI DIV1 neuron #17_all_1x2.nd2:VI DIV1 neuron #17_all_1x2_...	73.6	141.374	97	255	28.533	40.4	17.867	65.467	10405.1	585287
640	2	C2-MAX_VI DIV1 neuron #17_all_1x2.nd2:VI DIV1 neuron #17_all_1x2_...	73.6	83.169	15	255	28.533	40.4	17.867	65.467	6121.23	344319
405	3	C3-MAX_VI DIV1 neuron #17_all_1x2.nd2:VI DIV1 neuron #17_all_1x2_...	73.6	50.312	3	133	28.533	40.4	17.867	65.467	3702.93	208290
640 Tracings
Image	Tracing	Cluster	Type	Label	Length [micron]	Mean Val [a.u.]	SD Val [a.u.]	Min Val [a.u.]	Max Val [a.u.]
C2-MAX_VI DIV1 neuron #17_all_1x2	N1	Default	Primary	Default	21.758	14.828	8.623	3	69
C2-MAX_VI DIV1 neuron #17_all_1x2	N2	Default	Primary	Default	51.146	51.547	15.727	10	86
C2-MAX_VI DIV1 neuron #17_all_1x2	N3	Default	Primary	Default	12.058	15.099	6.25	4	33
C2-MAX_VI DIV1 neuron #17_all_1x2	N4	Default	Primary	Default	17.181	35.473	12.253	14	65
C2-MAX_VI DIV1 neuron #17_all_1x2	N5	Default	Primary	Default	42.173	29.061	26.533	2	101
640 Groups
Image	Cluster	Type	Count	Sum Len [micron]	Mean Len [micron]	SD Len [micron]	Min Len [micron]	Max Len [micron]	Mean Val [a.u.]	SD Val [a.u.]	Min Val [a.u.]	Max Val [a.u.]
C2-MAX_VI DIV1 neuron #17_all_1x2	All	All	5	144.317	28.863	16.905	12.058	51.146	35.195	22.728	2	101
Image 16
VI DIV1 neuron #18_all
Electroporation efficency by measuring GFP efficency with "Minimum" ROI (only covering soma)
		Label	Area	Mean	Min	Max	BX	BY	Width	Height	IntDen	RawIntDen
488	1	C1-MAX_VI DIV1 neuron #18_all_1x1.nd2:VI DIV1 neuron #18_all_1x1_...	56.089	176.635	114	255	28.533	25.733	11.2	14.533	9907.25	557283
640	2	C2-MAX_VI DIV1 neuron #18_all_1x1.nd2:VI DIV1 neuron #18_all_1x1_...	56.089	86.913	14	255	28.533	25.733	11.2	14.533	4874.83	274209
405	3	C3-MAX_VI DIV1 neuron #18_all_1x1.nd2:VI DIV1 neuron #18_all_1x1_...	56.089	52.515	3	155	28.533	25.733	11.2	14.533	2945.51	165685
640 Tracings
Image	Tracing	Cluster	Type	Label	Length [micron]	Mean Val [a.u.]	SD Val [a.u.]	Min Val [a.u.]	Max Val [a.u.]
C2-MAX_VI DIV1 neuron #18_all_1x1	N1	Default	Primary	Default	44.351	58.073	33.55	5	131
C2-MAX_VI DIV1 neuron #18_all_1x1	N2	Default	Primary	Default	28.827	52.509	24.52	12	99
C2-MAX_VI DIV1 neuron #18_all_1x1	N3	Default	Primary	Default	31.425	41.014	23.015	11	100
C2-MAX_VI DIV1 neuron #18_all_1x1	N4	Default	Primary	Default	19.596	28.063	12.168	8	78
C2-MAX_VI DIV1 neuron #18_all_1x1	N5	Default	Secondary	Default	20.604	29.649	10.565	11	85
640 Groups
Image	Cluster	Type	Count	Sum Len [micron]	Mean Len [micron]	SD Len [micron]	Min Len [micron]	Max Len [micron]	Mean Val [a.u.]	SD Val [a.u.]	Min Val [a.u.]	Max Val [a.u.]
C2-MAX_VI DIV1 neuron #18_all_1x1	All	All	5	144.803	28.961	10.006	19.596	44.351	44.974	27.019	5	131
Image 17
VI DIV1 neuron #21_all
Electroporation efficency by measuring GFP efficency with "Minimum" ROI (only covering soma)
		Label	Area	Mean	Min	Max	BX	BY	Width	Height	IntDen	RawIntDen
488	1	C1-MAX_VI DIV1 neuron #21_all_1x1.nd2:VI DIV1 neuron #21_all_1x1_...	75.2	136.223	96	255	20.533	5.733	40.8	52.933	10244	576224
640	2	C2-MAX_VI DIV1 neuron #21_all_1x1.nd2:VI DIV1 neuron #21_all_1x1_...	75.2	58.692	6	249	20.533	5.733	40.8	52.933	4413.62	248266
405	3	C3-MAX_VI DIV1 neuron #21_all_1x1.nd2:VI DIV1 neuron #21_all_1x1_...	75.2	55.544	3	178	20.533	5.733	40.8	52.933	4176.91	234951
640 Tracings
Image	Tracing	Cluster	Type	Label	Length [micron]	Mean Val [a.u.]	SD Val [a.u.]	Min Val [a.u.]	Max Val [a.u.]
C2-MAX_VI DIV1 neuron #21_all_1x1	N1	Default	Primary	Default	14.887	16.93	8.65	2	33
C2-MAX_VI DIV1 neuron #21_all_1x1	N2	Default	Primary	Default	11.38	13.314	6.344	3	28
C2-MAX_VI DIV1 neuron #21_all_1x1	N3	Default	Primary	Default	12.143	13.926	5.128	4	25
640 Groups
Image	Cluster	Type	Count	Sum Len [micron]	Mean Len [micron]	SD Len [micron]	Min Len [micron]	Max Len [micron]	Mean Val [a.u.]	SD Val [a.u.]	Min Val [a.u.]	Max Val [a.u.]
C2-MAX_VI DIV1 neuron #21_all_1x1	All	All	3	38.41	12.803	1.844	11.38	14.887	14.739	7.05	2	33

## Sheet: V409A DIV1 (2)
V409 neuron prep_09.21.2020
* all .nd2 images were converted into an 8-bit grayscale .tiff in order to be analyzed in NeuronJ (imageJ plugin) *
Scale is set at 7.5µm/pixel
Image 1
VA DIV1 neuron #1_all
Electroporation efficency by measuring GFP efficency with "Minimum" ROI (only covering soma)
		Label	Area	Mean	Min	Max	BX	BY	Width	Height	IntDen	RawIntDen
488	1	C1-MAX_VA DIV1 neuron #1_all_1x1.nd2:VA DIV1 neuron #1_all_1x1_M...	80.409	146.393	99	255	25.733	38.933	23.067	10.133	11771.3	662135
640	2	C2-MAX_VA DIV1 neuron #1_all_1x1.nd2:VA DIV1 neuron #1_all_1x1_M...	80.409	96.67	28	255	25.733	38.933	23.067	10.133	7773.14	437239
405	3	C3-MAX_VA DIV1 neuron #1_all_1x1.nd2:VA DIV1 neuron #1_all_1x1_M...	80.409	34.002	4	114	25.733	38.933	23.067	10.133	2734.03	153789
640 Tracings
Image	Tracing	Cluster	Type	Label	Length [micron]	Mean Val [a.u.]	SD Val [a.u.]	Min Val [a.u.]	Max Val [a.u.]
C2-MAX_VA DIV1 neuron #1_all_1x1	N1	Default	Primary	Default	25.983	20.393	9.833	6	50
C2-MAX_VA DIV1 neuron #1_all_1x1	N2	Default	Primary	Default	11.094	17.987	15.647	5	90
C2-MAX_VA DIV1 neuron #1_all_1x1	N3	Default	Primary	Default	17.396	23.362	10.494	5	59
C2-MAX_VA DIV1 neuron #1_all_1x1	N4	Default	Primary	Default	8.304	68.197	11.675	31	86
C2-MAX_VA DIV1 neuron #1_all_1x1	N5	Default	Primary	Default	12.186	34.22	8.721	12	52
C2-MAX_VA DIV1 neuron #1_all_1x1	N6	Default	Primary	Default	18.83	50.248	19.333	13	90
C2-MAX_VA DIV1 neuron #1_all_1x1	N7	Default	Primary	Default	19.368	30.489	14.838	4	67
640 Groups
Image	Cluster	Type	Count	Sum Len [micron]	Mean Len [micron]	SD Len [micron]	Min Len [micron]	Max Len [micron]	Mean Val [a.u.]	SD Val [a.u.]	Min Val [a.u.]	Max Val [a.u.]
C2-MAX_VA DIV1 neuron #1_all_1x1	All	All	7	113.162	16.166	6.036	8.304	25.983	32.621	19.987	4	90
Image 2
VA DIV1 neuron #2_all
Electroporation efficency by measuring GFP efficency with "Minimum" ROI (only covering soma)
		Label	Area	Mean	Min	Max	BX	BY	Width	Height	IntDen	RawIntDen
488	1	C1-MAX_VA DIV1 neuron #2_all_1x1.nd2:VA DIV1 neuron #2_all_1x1_M...	52.569	147.948	101	255	23.467	0	31.867	24.267	7777.44	437481
640	2	C2-MAX_VA DIV1 neuron #2_all_1x1.nd2:VA DIV1 neuron #2_all_1x1_M...	52.569	83.71	18	225	23.467	0	31.867	24.267	4400.53	247530
405	3	C3-MAX_VA DIV1 neuron #2_all_1x1.nd2:VA DIV1 neuron #2_all_1x1_M...	52.569	55.922	5	129	23.467	0	31.867	24.267	2939.75	165361
640 Tracings
Image	Tracing	Cluster	Type	Label	Length [micron]	Mean Val [a.u.]	SD Val [a.u.]	Min Val [a.u.]	Max Val [a.u.]
C2-MAX_VA DIV1 neuron #2_all_1x1	N1	Default	Primary	Default	13.933	23.756	12.25	5	51
C2-MAX_VA DIV1 neuron #2_all_1x1	N2	Default	Primary	Default	17.684	29.237	12.812	10	67
C2-MAX_VA DIV1 neuron #2_all_1x1	N3	Default	Primary	Default	37.996	19.699	15.364	2	53
C2-MAX_VA DIV1 neuron #2_all_1x1	N4	Default	Primary	Default	6.25	12.537	6.281	5	26
C2-MAX_VA DIV1 neuron #2_all_1x1	N5	Default	Primary	Default	12.053	31.484	12.44	6	53
C2-MAX_VA DIV1 neuron #2_all_1x1	N6	Default	Secondary	Default	4.438	9.346	9.562	2	40
C2-MAX_VA DIV1 neuron #2_all_1x1	N7	Default	Secondary	Default	4.932	8.417	3.573	4	20
640 Groups
Image	Cluster	Type	Count	Sum Len [micron]	Mean Len [micron]	SD Len [micron]	Min Len [micron]	Max Len [micron]	Mean Val [a.u.]	SD Val [a.u.]	Min Val [a.u.]	Max Val [a.u.]
C2-MAX_VA DIV1 neuron #2_all_1x1	All	All	7	97.285	13.898	11.739	4.438	37.996	22.289	14.671	2	67
Image 3
VA DIV1 neuron #5_all
Electroporation efficency by measuring GFP efficency with "Minimum" ROI (only covering soma)
		Label	Area	Mean	Min	Max	BX	BY	Width	Height	IntDen	RawIntDen
488	1	C1-MAX_VA DIV1 neuron #5_all_1x1.nd2:VA DIV1 neuron #5_all_1x1_M...	67.876	176.446	129	255	21.067	28.4	12.4	11.467	11976.4	673672
640	2	C2-MAX_VA DIV1 neuron #5_all_1x1.nd2:VA DIV1 neuron #5_all_1x1_M...	67.876	101.013	18	255	21.067	28.4	12.4	11.467	6856.34	385669
405	3	C3-MAX_VA DIV1 neuron #5_all_1x1.nd2:VA DIV1 neuron #5_all_1x1_M...	67.876	53.665	3	132	21.067	28.4	12.4	11.467	3642.52	204892
640 Tracings
Image	Tracing	Cluster	Type	Label	Length [micron]	Mean Val [a.u.]	SD Val [a.u.]	Min Val [a.u.]	Max Val [a.u.]
C2-MAX_VA DIV1 neuron #5_all_1x1	N1	Default	Primary	Default	32.282	48.456	28.497	2	100
C2-MAX_VA DIV1 neuron #5_all_1x1	N2	Default	Primary	Default	38.165	72.35	34.926	5	145
C2-MAX_VA DIV1 neuron #5_all_1x1	N3	Default	Primary	Default	22.699	30.603	22.211	1	74
C2-MAX_VA DIV1 neuron #5_all_1x1	N4	Default	Primary	Default	13.07	36.938	22.525	4	81
C2-MAX_VA DIV1 neuron #5_all_1x1	N5	Default	Secondary	Default	14.532	12.135	5.332	3	33
640 Groups
Image	Cluster	Type	Count	Sum Len [micron]	Mean Len [micron]	SD Len [micron]	Min Len [micron]	Max Len [micron]	Mean Val [a.u.]	SD Val [a.u.]	Min Val [a.u.]	Max Val [a.u.]
C2-MAX_VA DIV1 neuron #5_all_1x1	All	All	5	120.747	24.149	10.954	13.07	38.165	46.407	33.914	1	145
Image 4
VA DIV1 neuron #6_all
Electroporation efficency by measuring GFP efficency with "Minimum" ROI (only covering soma)
		Label	Area	Mean	Min	Max	BX	BY	Width	Height	IntDen	RawIntDen
488	1	C1-MAX_VA DIV1 neuron #6_all_1x1.nd2:VA DIV1 neuron #6_all_1x1_M...	82.56	167.156	111	255	8.133	23.6	34.933	19.333	13800.4	776273
640	2	C2-MAX_VA DIV1 neuron #6_all_1x1.nd2:VA DIV1 neuron #6_all_1x1_M...	82.56	98.978	20	255	8.133	23.6	34.933	19.333	8171.66	459656
405	3	C3-MAX_VA DIV1 neuron #6_all_1x1.nd2:VA DIV1 neuron #6_all_1x1_M...	82.56	58.933	3	148	8.133	23.6	34.933	19.333	4865.48	273683
640 Tracings
Image	Tracing	Cluster	Type	Label	Length [micron]	Mean Val [a.u.]	SD Val [a.u.]	Min Val [a.u.]	Max Val [a.u.]
C2-MAX_VA DIV1 neuron #6_all_1x1	N1	Default	Primary	Default	34.832	39.292	16.88	10	103
C2-MAX_VA DIV1 neuron #6_all_1x1	N2	Default	Primary	Default	28.179	27.536	20.686	5	104
C2-MAX_VA DIV1 neuron #6_all_1x1	N3	Default	Primary	Default	37.152	28.772	21.004	5	86
C2-MAX_VA DIV1 neuron #6_all_1x1	N4	Default	Primary	Default	13.562	38.219	17.887	5	79
C2-MAX_VA DIV1 neuron #6_all_1x1	N5	Default	Secondary	Default	11.947	13.827	5.943	3	29
640 Groups
Image	Cluster	Type	Count	Sum Len [micron]	Mean Len [micron]	SD Len [micron]	Min Len [micron]	Max Len [micron]	Mean Val [a.u.]	SD Val [a.u.]	Min Val [a.u.]	Max Val [a.u.]
C2-MAX_VA DIV1 neuron #6_all_1x1	All	All	5	125.672	25.134	11.785	11.947	37.152	31.114	19.939	3	104
Image 5
VA DIV1 neuron #8_all
Electroporation efficency by measuring GFP efficency with "Minimum" ROI (only covering soma)
		Label	Area	Mean	Min	Max	BX	BY	Width	Height	IntDen	RawIntDen
488	1	C1-MAX_VA DIV1 neuron #8_all_1x1.nd2:VA DIV1 neuron #8_all_1x1_M...	64.836	164.976	105	255	36.267	30	8.267	13.2	10696.3	601666
640	2	C2-MAX_VA DIV1 neuron #8_all_1x1.nd2:VA DIV1 neuron #8_all_1x1_M...	64.836	154.291	30	255	36.267	30	8.267	13.2	10003.5	562698
405	3	C3-MAX_VA DIV1 neuron #8_all_1x1.nd2:VA DIV1 neuron #8_all_1x1_M...	64.836	56.469	4	157	36.267	30	8.267	13.2	3661.19	205942
640 Tracings
Image	Tracing	Cluster	Type	Label	Length [micron]	Mean Val [a.u.]	SD Val [a.u.]	Min Val [a.u.]	Max Val [a.u.]
C2-MAX_VA DIV1 neuron #8_all_1x1	N1	Default	Primary	Default	26.443	72.031	38.339	5	134
C2-MAX_VA DIV1 neuron #8_all_1x1	N2	Default	Primary	Default	10.378	33.645	17.773	7	66
C2-MAX_VA DIV1 neuron #8_all_1x1	N3	Default	Primary	Default	35.274	52.583	42.153	2	145
640 Groups
Image	Cluster	Type	Count	Sum Len [micron]	Mean Len [micron]	SD Len [micron]	Min Len [micron]	Max Len [micron]	Mean Val [a.u.]	SD Val [a.u.]	Min Val [a.u.]	Max Val [a.u.]
C2-MAX_VA DIV1 neuron #8_all_1x1	All	All	3	72.095	24.032	12.622	10.378	35.274	57.343	40.041	2	145
Image 6
VA DIV1 neuron #9_all
Electroporation efficency by measuring GFP efficency with "Minimum" ROI (only covering soma)
		Label	Area	Mean	Min	Max	BX	BY	Width	Height	IntDen	RawIntDen
488	1	C1-MAX_VA DIV1 neuron #9_all_1x1.nd2:VA DIV1 neuron #9_all_1x1_M...	89.049	182.319	129	255	31.467	38.8	25.067	15.067	16235.3	913236
640	2	C2-MAX_VA DIV1 neuron #9_all_1x1.nd2:VA DIV1 neuron #9_all_1x1_M...	89.049	105.709	24	255	31.467	38.8	25.067	15.067	9413.28	529497
405	3	C3-MAX_VA DIV1 neuron #9_all_1x1.nd2:VA DIV1 neuron #9_all_1x1_M...	89.049	40.365	4	127	31.467	38.8	25.067	15.067	3594.47	202189
640 Tracings
Image	Tracing	Cluster	Type	Label	Length [micron]	Mean Val [a.u.]	SD Val [a.u.]	Min Val [a.u.]	Max Val [a.u.]
C2-MAX_VA DIV1 neuron #9_all_1x1	N1	Default	Primary	Default	27.528	44.84	22.652	13	104
C2-MAX_VA DIV1 neuron #9_all_1x1	N2	Default	Primary	Default	20.862	31.338	7.418	16	52
C2-MAX_VA DIV1 neuron #9_all_1x1	N3	Default	Primary	Default	24.403	45.807	22.315	5	95
C2-MAX_VA DIV1 neuron #9_all_1x1	N4	Default	Primary	Default	15.44	71.405	12.814	35	98
C2-MAX_VA DIV1 neuron #9_all_1x1	N5	Default	Secondary	Default	11.69	26.056	13.662	6	58
C2-MAX_VA DIV1 neuron #9_all_1x1	N6	Default	Secondary	Default	7.991	27.393	9.245	10	52
640 Groups
Image	Cluster	Type	Count	Sum Len [micron]	Mean Len [micron]	SD Len [micron]	Min Len [micron]	Max Len [micron]	Mean Val [a.u.]	SD Val [a.u.]	Min Val [a.u.]	Max Val [a.u.]
C2-MAX_VA DIV1 neuron #9_all_1x1	All	All	6	107.915	17.986	7.57	7.991	27.528	43.635	22.487	5	104
Image 7
VA DIV1 neuron #11_all
Electroporation efficency by measuring GFP efficency with "Minimum" ROI (only covering soma)
		Label	Area	Mean	Min	Max	BX	BY	Width	Height	IntDen	RawIntDen
488	1	C1-MAX_VA DIV1 neuron #11_all_1x1.nd2:VA DIV1 neuron #11_all_1x1_...	92.462	165.833	116	255	31.867	25.867	15.733	9.6	15333.2	862495
640	2	C2-MAX_VA DIV1 neuron #11_all_1x1.nd2:VA DIV1 neuron #11_all_1x1_...	92.462	95.71	9	255	31.867	25.867	15.733	9.6	8849.55	497787
405	3	C3-MAX_VA DIV1 neuron #11_all_1x1.nd2:VA DIV1 neuron #11_all_1x1_...	92.462	32.819	3	96	31.867	25.867	15.733	9.6	3034.49	170690
640 Tracings
Image	Tracing	Cluster	Type	Label	Length [micron]	Mean Val [a.u.]	SD Val [a.u.]	Min Val [a.u.]	Max Val [a.u.]
C2-MAX_VA DIV1 neuron #11_all_1x1	N1	Default	Primary	Default	10.465	76.2	12.723	43	92
C2-MAX_VA DIV1 neuron #11_all_1x1	N2	Default	Primary	Default	15.572	37.652	11.464	18	58
C2-MAX_VA DIV1 neuron #11_all_1x1	N3	Default	Primary	Default	43.07	62.614	33.381	10	118
C2-MAX_VA DIV1 neuron #11_all_1x1	N4	Default	Primary	Default	21.912	38.333	13.948	9	64
C2-MAX_VA DIV1 neuron #11_all_1x1	N5	Default	Primary	Default	9.919	49.231	18.005	16	77
C2-MAX_VA DIV1 neuron #11_all_1x1	N6	Default	Primary	Default	20.819	47.69	15.154	22	80
C2-MAX_VA DIV1 neuron #11_all_1x1	N7	Default	Secondary	Default	8.175	25.692	19.585	11	86
640 Groups
Image	Cluster	Type	Count	Sum Len [micron]	Mean Len [micron]	SD Len [micron]	Min Len [micron]	Max Len [micron]	Mean Val [a.u.]	SD Val [a.u.]	Min Val [a.u.]	Max Val [a.u.]
C2-MAX_VA DIV1 neuron #11_all_1x1	All	All	7	129.931	18.562	12.069	8.175	43.07	50.273	26.092	9	118
Image 8
VA DIV1 neuron #12_all
Electroporation efficency by measuring GFP efficency with "Minimum" ROI (only covering soma)
		Label	Area	Mean	Min	Max	BX	BY	Width	Height	IntDen	RawIntDen
488	1	C1-MAX_VA DIV1 neuron #12_all_1x2.nd2:VA DIV1 neuron #12_all_1x2_...	73.582	160.063	117	255	34.133	44.267	31.6	48.667	11777.8	662499
640	2	C2-MAX_VA DIV1 neuron #12_all_1x2.nd2:VA DIV1 neuron #12_all_1x2_...	73.582	44.998	6	120	34.133	44.267	31.6	48.667	3311.02	186245
405	3	C3-MAX_VA DIV1 neuron #12_all_1x2.nd2:VA DIV1 neuron #12_all_1x2_...	73.582	45.357	3	127	34.133	44.267	31.6	48.667	3337.44	187731
640 Tracings
Image	Tracing	Cluster	Type	Label	Length [micron]	Mean Val [a.u.]	SD Val [a.u.]	Min Val [a.u.]	Max Val [a.u.]
C2-MAX_VA DIV1 neuron #12_all_1x2	N1	Default	Primary	Default	14.716	29.736	8.245	15	52
C2-MAX_VA DIV1 neuron #12_all_1x2	N2	Default	Primary	Default	12.888	15.99	6.8	4	31
C2-MAX_VA DIV1 neuron #12_all_1x2	N3	Default	Primary	Default	46.992	25.632	13.364	3	55
C2-MAX_VA DIV1 neuron #12_all_1x2	N4	Default	Primary	Default	16.285	14.477	5.37	4	26
C2-MAX_VA DIV1 neuron #12_all_1x2	N5	Default	Primary	Default	23.831	12.826	7.081	2	28
C2-MAX_VA DIV1 neuron #12_all_1x2	N6	Default	Secondary	Default	6.158	5.833	1.859	3	13
640 Groups
Image	Cluster	Type	Count	Sum Len [micron]	Mean Len [micron]	SD Len [micron]	Min Len [micron]	Max Len [micron]	Mean Val [a.u.]	SD Val [a.u.]	Min Val [a.u.]	Max Val [a.u.]
C2-MAX_VA DIV1 neuron #12_all_1x2	All	All	6	120.87	20.145	14.332	6.158	46.992	19.861	11.957	2	55
Image 9
VA DIV1 neuron #13_all
Electroporation efficency by measuring GFP efficency with "Minimum" ROI (only covering soma)
		Label	Area	Mean	Min	Max	BX	BY	Width	Height	IntDen	RawIntDen
488	1	C1-MAX_VA DIV1 neuron #13_all_1x1.nd2:VA DIV1 neuron #13_all_1x1_...	66.507	168.249	110	255	36.933	36.133	10.533	14.533	11189.7	629418
640	2	C2-MAX_VA DIV1 neuron #13_all_1x1.nd2:VA DIV1 neuron #13_all_1x1_...	66.507	87.44	20	255	36.933	36.133	10.533	14.533	5815.32	327112
405	3	C3-MAX_VA DIV1 neuron #13_all_1x1.nd2:VA DIV1 neuron #13_all_1x1_...	66.507	45.881	4	152	36.933	36.133	10.533	14.533	3051.36	171639
640 Tracings
Image	Tracing	Cluster	Type	Label	Length [micron]	Mean Val [a.u.]	SD Val [a.u.]	Min Val [a.u.]	Max Val [a.u.]
C2-MAX_VA DIV1 neuron #13_all_1x1	N1	Default	Primary	Default	13.467	26.791	19.58	5	79
C2-MAX_VA DIV1 neuron #13_all_1x1	N2	Default	Primary	Default	17.794	45.58	23.691	5	104
C2-MAX_VA DIV1 neuron #13_all_1x1	N3	Default	Primary	Default	17.269	24.556	10.673	5	55
C2-MAX_VA DIV1 neuron #13_all_1x1	N4	Default	Primary	Default	6.504	31.239	17.043	10	64
C2-MAX_VA DIV1 neuron #13_all_1x1	N5	Default	Primary	Default	11.941	47.947	18.164	17	82
C2-MAX_VA DIV1 neuron #13_all_1x1	N6	Default	Primary	Default	29.336	28.34	18.543	3	68
C2-MAX_VA DIV1 neuron #13_all_1x1	N7	Default	Primary	Default	18.386	21.238	11.219	7	57
C2-MAX_VA DIV1 neuron #13_all_1x1	N8	Default	Secondary	Default	9.433	15.939	7.844	7	61
640 Groups
Image	Cluster	Type	Count	Sum Len [micron]	Mean Len [micron]	SD Len [micron]	Min Len [micron]	Max Len [micron]	Mean Val [a.u.]	SD Val [a.u.]	Min Val [a.u.]	Max Val [a.u.]
C2-MAX_VA DIV1 neuron #13_all_1x1	All	All	8	124.13	15.516	6.997	6.504	29.336	30.146	19.627	3	104
Image 10
VA DIV1 neuron #15_all
Electroporation efficency by measuring GFP efficency with "Minimum" ROI (only covering soma)
		Label	Area	Mean	Min	Max	BX	BY	Width	Height	IntDen	RawIntDen
488	1	C1-MAX_VA DIV1 neuron #15_all_1x1.nd2:VA DIV1 neuron #15_all_1x1_...	83.271	153.158	105	255	0	20.533	68	22.267	12753.6	717391
640	2	C2-MAX_VA DIV1 neuron #15_all_1x1.nd2:VA DIV1 neuron #15_all_1x1_...	83.271	94.045	9	239	0	20.533	68	22.267	7831.24	440507
405	3	C3-MAX_VA DIV1 neuron #15_all_1x1.nd2:VA DIV1 neuron #15_all_1x1_...	83.271	43.161	4	117	0	20.533	68	22.267	3594.03	202164
640 Tracings
Image	Tracing	Cluster	Type	Label	Length [micron]	Mean Val [a.u.]	SD Val [a.u.]	Min Val [a.u.]	Max Val [a.u.]
C2-MAX_VA DIV1 neuron #15_all_1x1	N1	Default	Primary	Default	9.816	22.672	7.476	7	39
C2-MAX_VA DIV1 neuron #15_all_1x1	N2	Default	Primary	Default	21.226	34.695	26.378	5	92
C2-MAX_VA DIV1 neuron #15_all_1x1	N3	Default	Primary	Default	21.872	35.288	25.41	6	92
C2-MAX_VA DIV1 neuron #15_all_1x1	N4	Default	Primary	Default	7.399	33.446	12.516	15	65
C2-MAX_VA DIV1 neuron #15_all_1x1	N5	Default	Primary	Default	18.846	29.061	15.307	6	67
C2-MAX_VA DIV1 neuron #15_all_1x1	N6	Default	Primary	Default	14.666	40.027	14.949	11	71
C2-MAX_VA DIV1 neuron #15_all_1x1	N7	Default	Primary	Default	15.416	21.275	14.402	2	62
C2-MAX_VA DIV1 neuron #15_all_1x1	N8	Default	Primary	Default	15.468	17.142	7.978	5	37
640 Groups
Image	Cluster	Type	Count	Sum Len [micron]	Mean Len [micron]	SD Len [micron]	Min Len [micron]	Max Len [micron]	Mean Val [a.u.]	SD Val [a.u.]	Min Val [a.u.]	Max Val [a.u.]
C2-MAX_VA DIV1 neuron #15_all_1x1	All	All	8	124.71	15.589	5.115	7.399	21.872	30.131	19.981	2	92
Image 11
VA DIV1 neuron #17_all
Electroporation efficency by measuring GFP efficency with "Minimum" ROI (only covering soma)
		Label	Area	Mean	Min	Max	BX	BY	Width	Height	IntDen	RawIntDen
488	1	C1-MAX_VA DIV1 neuron #17_all_1x1.nd2:VA DIV1 neuron #17_all_1x1_...	91.449	147.449	93	255	14.267	41.867	13.867	9.733	13484	758477
640	2	C2-MAX_VA DIV1 neuron #17_all_1x1.nd2:VA DIV1 neuron #17_all_1x1_...	91.449	133.218	33	255	14.267	41.867	13.867	9.733	12182.6	685273
405	3	C3-MAX_VA DIV1 neuron #17_all_1x1.nd2:VA DIV1 neuron #17_all_1x1_...	91.449	48.048	4	145	14.267	41.867	13.867	9.733	4393.96	247160
640 Tracings
Image	Tracing	Cluster	Type	Label	Length [micron]	Mean Val [a.u.]	SD Val [a.u.]	Min Val [a.u.]	Max Val [a.u.]
C2-MAX_VA DIV1 neuron #17_all_1x1	N1	Default	Primary	Default	19.15	38.081	18.625	4	85
C2-MAX_VA DIV1 neuron #17_all_1x1	N2	Default	Primary	Default	27.083	35.827	22.993	4	104
C2-MAX_VA DIV1 neuron #17_all_1x1	N3	Default	Primary	Default	17.881	42.977	22.997	8	147
C2-MAX_VA DIV1 neuron #17_all_1x1	N4	Default	Primary	Default	10.288	40.211	17.104	7	68
C2-MAX_VA DIV1 neuron #17_all_1x1	N5	Default	Secondary	Default	5.692	14.13	10.236	3	61
640 Groups
Image	Cluster	Type	Count	Sum Len [micron]	Mean Len [micron]	SD Len [micron]	Min Len [micron]	Max Len [micron]	Mean Val [a.u.]	SD Val [a.u.]	Min Val [a.u.]	Max Val [a.u.]
C2-MAX_VA DIV1 neuron #17_all_1x1	All	All	5	80.093	16.019	8.294	5.692	27.083	36.857	21.646	3	147
Image 12
VA DIV1 neuron #18_all
Electroporation efficency by measuring GFP efficency with "Minimum" ROI (only covering soma)
		Label	Area	Mean	Min	Max	BX	BY	Width	Height	IntDen	RawIntDen
488	1	C1-MAX_VA DIV1 neuron #18_all_1x1.nd2:VA DIV1 neuron #18_all_1x1_...	86.56	156.262	104	255	40.8	33.333	23.467	27.867	13526.1	760842
640	2	C2-MAX_VA DIV1 neuron #18_all_1x1.nd2:VA DIV1 neuron #18_all_1x1_...	86.56	132.285	32	255	40.8	33.333	23.467	27.867	11450.6	644094
405	3	C3-MAX_VA DIV1 neuron #18_all_1x1.nd2:VA DIV1 neuron #18_all_1x1_...	86.56	59.059	4	151	40.8	33.333	23.467	27.867	5112.11	287556
640 Tracings
Image	Tracing	Cluster	Type	Label	Length [micron]	Mean Val [a.u.]	SD Val [a.u.]	Min Val [a.u.]	Max Val [a.u.]
C2-MAX_VA DIV1 neuron #18_all_1x1	N1	Default	Primary	Default	18.597	77.934	36.081	25	145
C2-MAX_VA DIV1 neuron #18_all_1x1	N2	Default	Primary	Default	15.393	49.245	19.487	8	82
C2-MAX_VA DIV1 neuron #18_all_1x1	N3	Default	Primary	Default	11.054	76.868	21.037	19	110
C2-MAX_VA DIV1 neuron #18_all_1x1	N4	Default	Primary	Default	30.494	43.319	22.942	9	90
640 Groups
Image	Cluster	Type	Count	Sum Len [micron]	Mean Len [micron]	SD Len [micron]	Min Len [micron]	Max Len [micron]	Mean Val [a.u.]	SD Val [a.u.]	Min Val [a.u.]	Max Val [a.u.]
C2-MAX_VA DIV1 neuron #18_all_1x1	All	All	4	75.539	18.885	8.334	11.054	30.494	57.513	30.19	8	145
Image 13
VA DIV1 neuron #19_all
Electroporation efficency by measuring GFP efficency with "Minimum" ROI (only covering soma)
		Label	Area	Mean	Min	Max	BX	BY	Width	Height	IntDen	RawIntDen
488	1	C1-MAX_VA DIV1 neuron #19_all_1x2.nd2:VA DIV1 neuron #19_all_1x2_...	54.72	185.647	135	255	24.267	59.467	11.067	9.733	10158.6	571420
640	2	C2-MAX_VA DIV1 neuron #19_all_1x2.nd2:VA DIV1 neuron #19_all_1x2_...	54.72	98.932	21	255	24.267	59.467	11.067	9.733	5413.55	304512
405	3	C3-MAX_VA DIV1 neuron #19_all_1x2.nd2:VA DIV1 neuron #19_all_1x2_...	54.72	55.271	6	109	24.267	59.467	11.067	9.733	3024.44	170125
640 Tracings
Image	Tracing	Cluster	Type	Label	Length [micron]	Mean Val [a.u.]	SD Val [a.u.]	Min Val [a.u.]	Max Val [a.u.]
C2-MAX_VA DIV1 neuron #19_all_1x2	N1	Default	Primary	Default	31.836	23.442	12.82	4	68
C2-MAX_VA DIV1 neuron #19_all_1x2	N2	Default	Primary	Default	21.697	53.934	35.814	7	127
C2-MAX_VA DIV1 neuron #19_all_1x2	N3	Default	Primary	Default	35.771	51.025	22.619	20	133
C2-MAX_VA DIV1 neuron #19_all_1x2	N4	Default	Primary	Default	15.497	31.877	19.031	12	89
640 Groups
Image	Cluster	Type	Count	Sum Len [micron]	Mean Len [micron]	SD Len [micron]	Min Len [micron]	Max Len [micron]	Mean Val [a.u.]	SD Val [a.u.]	Min Val [a.u.]	Max Val [a.u.]
C2-MAX_VA DIV1 neuron #19_all_1x2	All	All	4	104.802	26.2	9.277	15.497	35.771	40.028	26.735	4	133
Image 14
VA DIV1 neuron #20_all
Electroporation efficency by measuring GFP efficency with "Minimum" ROI (only covering soma)
		Label	Area	Mean	Min	Max	BX	BY	Width	Height	IntDen	RawIntDen
488	1	C1-MAX_VA DIV1 neuron #20_all_2x1.nd2:VA DIV1 neuron #20_all_2x1_...	69.493	128.359	100	255	5.467	0	120.8	50.667	8920.11	501756
640	2	C2-MAX_VA DIV1 neuron #20_all_2x1.nd2:VA DIV1 neuron #20_all_2x1_...	69.493	28.379	3	255	5.467	0	120.8	50.667	1972.18	110935
405	3	C3-MAX_VA DIV1 neuron #20_all_2x1.nd2:VA DIV1 neuron #20_all_2x1_...	69.493	44.454	3	122	5.467	0	120.8	50.667	3089.28	173772
640 Tracings
Image	Tracing	Cluster	Type	Label	Length [micron]	Mean Val [a.u.]	SD Val [a.u.]	Min Val [a.u.]	Max Val [a.u.]
C2-MAX_VA DIV1 neuron #20_all_2x1	N1	Default	Primary	Default	44.102	19.301	10.512	2	46
C2-MAX_VA DIV1 neuron #20_all_2x1	N2	Default	Primary	Default	15.512	15.767	7.728	2	32
C2-MAX_VA DIV1 neuron #20_all_2x1	N3	Default	Primary	Default	46.344	21.525	7.776	4	41
C2-MAX_VA DIV1 neuron #20_all_2x1	N4	Default	Primary	Default	39.132	21.16	11.423	5	54
640 Groups
Image	Cluster	Type	Count	Sum Len [micron]	Mean Len [micron]	SD Len [micron]	Min Len [micron]	Max Len [micron]	Mean Val [a.u.]	SD Val [a.u.]	Min Val [a.u.]	Max Val [a.u.]
C2-MAX_VA DIV1 neuron #20_all_2x1	All	All	4	145.091	36.273	14.164	15.512	46.344	20.1	9.737	2	54
Image 15
VA DIV1 neuron #21_all
Electroporation efficency by measuring GFP efficency with "Minimum" ROI (only covering soma)
		Label	Area	Mean	Min	Max	BX	BY	Width	Height	IntDen	RawIntDen
488	1	C1-MAX_VA DIV1 neuron #21_all_1x1.nd2:VA DIV1 neuron #21_all_1x1_...	72.196	148.637	104	255	15.067	35.467	11.6	12.267	10731	603616
640	2	C2-MAX_VA DIV1 neuron #21_all_1x1.nd2:VA DIV1 neuron #21_all_1x1_...	72.196	61.348	16	172	15.067	35.467	11.6	12.267	4429.05	249134
405	3	C3-MAX_VA DIV1 neuron #21_all_1x1.nd2:VA DIV1 neuron #21_all_1x1_...	72.196	41.253	3	141	15.067	35.467	11.6	12.267	2978.28	167528
640 Tracings
Image	Tracing	Cluster	Type	Label	Length [micron]	Mean Val [a.u.]	SD Val [a.u.]	Min Val [a.u.]	Max Val [a.u.]
C2-MAX_VA DIV1 neuron #21_all_1x1	N1	Default	Primary	Default	28.533	47.586	24.892	7	109
C2-MAX_VA DIV1 neuron #21_all_1x1	N2	Default	Primary	Default	36.409	44.418	16.924	7	89
C2-MAX_VA DIV1 neuron #21_all_1x1	N3	Default	Primary	Default	10.929	53.461	17.819	22	107
C2-MAX_VA DIV1 neuron #21_all_1x1	N4	Default	Primary	Default	9.155	40.545	12.546	13	67
C2-MAX_VA DIV1 neuron #21_all_1x1	N5	Default	Primary	Default	12.432	22.395	11.111	8	67
C2-MAX_VA DIV1 neuron #21_all_1x1	N6	Default	Primary	Default	17.564	37.397	16.447	7	68
C2-MAX_VA DIV1 neuron #21_all_1x1	N7	Default	Primary	Default	9.78	16.682	6.762	5	35
640 Groups
Image	Cluster	Type	Count	Sum Len [micron]	Mean Len [micron]	SD Len [micron]	Min Len [micron]	Max Len [micron]	Mean Val [a.u.]	SD Val [a.u.]	Min Val [a.u.]	Max Val [a.u.]
C2-MAX_VA DIV1 neuron #21_all_1x1	All	All	7	124.802	17.829	10.619	9.155	36.409	40.215	20.496	5	109

## Sheet: WT DIV2 (2)
V409 neuron prep_09.21.2020
* all .nd2 images were converted into an 8-bit grayscale .tiff in order to be analyzed in NeuronJ (imageJ plugin) *
Scale is set at 7.5µm/pixel
Image 1
WT DIV2 neuron #1_all
Electroporation efficency by measuring GFP efficency with "Minimum" ROI (only covering soma)
		Label	Area	Mean	Min	Max	BX	BY	Width	Height	IntDen	RawIntDen
488	1	C1-MAX_WT DIV2 neuron #1_all_1x2.nd2:WT DIV2 neuron #1_all_1x2_M...	84.089	146.631	95	255	21.333	33.2	35.6	70.133	12330	693563
640	2	C2-MAX_WT DIV2 neuron #1_all_1x2.nd2:WT DIV2 neuron #1_all_1x2_M...	84.089	117.297	10	246	21.333	33.2	35.6	70.133	9863.34	554813
405	3	C3-MAX_WT DIV2 neuron #1_all_1x2.nd2:WT DIV2 neuron #1_all_1x2_M...	84.089	40.006	4	116	21.333	33.2	35.6	70.133	3364.05	189228
640 Tracings
Image	Tracing	Cluster	Type	Label	Length [micron]	Mean Val [a.u.]	SD Val [a.u.]	Min Val [a.u.]	Max Val [a.u.]
C2-MAX_WT DIV2 neuron #1_all_1x2	N1	Default	Primary	Default	14.583	30.703	18.495	1	67
C2-MAX_WT DIV2 neuron #1_all_1x2	N2	Default	Primary	Default	7.564	41.869	9.65	19	56
C2-MAX_WT DIV2 neuron #1_all_1x2	N3	Default	Primary	Default	5.047	41.5	14.889	19	74
C2-MAX_WT DIV2 neuron #1_all_1x2	N4	Default	Primary	Default	80.033	138.597	13.418	62	153
C2-MAX_WT DIV2 neuron #1_all_1x2	N5	Default	Primary	Default	7.369	49.078	19.433	12	87
C2-MAX_WT DIV2 neuron #1_all_1x2	N6	Default	Primary	Default	6.625	37.745	21.091	2	63
640 Groups
Image	Cluster	Type	Count	Sum Len [micron]	Mean Len [micron]	SD Len [micron]	Min Len [micron]	Max Len [micron]	Mean Val [a.u.]	SD Val [a.u.]	Min Val [a.u.]	Max Val [a.u.]
C2-MAX_WT DIV2 neuron #1_all_1x2	All	All	6	121.222	20.204	29.495	5.047	80.033	103.342	50.215	1	153
Image 2
WT DIV2 neuron #3_all
Electroporation efficency by measuring GFP efficency with "Minimum" ROI (only covering soma)
		Label	Area	Mean	Min	Max	BX	BY	Width	Height	IntDen	RawIntDen
488	1	C1-MAX_WT DIV2 neuron #3_all_1x1.nd2:WT DIV2 neuron #3_all_1x1_M...	92.391	155.04	109	255	13.6	35.733	13.467	12.133	14324.3	805744
640	2	C2-MAX_WT DIV2 neuron #3_all_1x1.nd2:WT DIV2 neuron #3_all_1x1_M...	92.391	98.198	14	236	13.6	35.733	13.467	12.133	9072.62	510335
405	3	C3-MAX_WT DIV2 neuron #3_all_1x1.nd2:WT DIV2 neuron #3_all_1x1_M...	92.391	46.842	3	124	13.6	35.733	13.467	12.133	4327.75	243436
640 Tracings
Image	Tracing	Cluster	Type	Label	Length [micron]	Mean Val [a.u.]	SD Val [a.u.]	Min Val [a.u.]	Max Val [a.u.]
C2-MAX_WT DIV2 neuron #3_all_1x1	N1	Default	Primary	Default	8.867	26.982	10.372	7	43
C2-MAX_WT DIV2 neuron #3_all_1x1	N2	Default	Primary	Default	122.901	110.943	27.131	29	152
C2-MAX_WT DIV2 neuron #3_all_1x1	N3	Default	Primary	Default	11.207	26.333	5.308	13	47
C2-MAX_WT DIV2 neuron #3_all_1x1	N4	Default	Primary	Default	8.555	29.803	8.218	11	44
C2-MAX_WT DIV2 neuron #3_all_1x1	N5	Default	Primary	Default	8.804	36.879	12.233	9	56
C2-MAX_WT DIV2 neuron #3_all_1x1	N6	Default	Primary	Default	11.428	34.171	15.927	8	56
640 Groups
Image	Cluster	Type	Count	Sum Len [micron]	Mean Len [micron]	SD Len [micron]	Min Len [micron]	Max Len [micron]	Mean Val [a.u.]	SD Val [a.u.]	Min Val [a.u.]	Max Val [a.u.]
C2-MAX_WT DIV2 neuron #3_all_1x1	All	All	6	171.762	28.627	46.202	8.555	122.901	87.692	43.413	7	152
Image 3
WT DIV2 neuron #4_all (z 4-15)
Electroporation efficency by measuring GFP efficency with "Minimum" ROI (only covering soma)
		Label	Area	Mean	Min	Max	BX	BY	Width	Height	IntDen	RawIntDen
488	1	C1-MAX_WT DIV2 neuron #4_all_1x3.nd2:WT DIV2 neuron #4_all_1x3_M...	86.578	145.043	102	255	24.267	12.533	44	171.733	12557.5	706360
640	2	C2-MAX_WT DIV2 neuron #4_all_1x3.nd2:WT DIV2 neuron #4_all_1x3_M...	86.578	105.804	9	254	24.267	12.533	44	171.733	9160.28	515266
405	3	C3-MAX_WT DIV2 neuron #4_all_1x3.nd2:WT DIV2 neuron #4_all_1x3_M...	86.578	25.864	2	64	24.267	12.533	44	171.733	2239.25	125958
640 Tracings
Image	Tracing	Cluster	Type	Label	Length [micron]	Mean Val [a.u.]	SD Val [a.u.]	Min Val [a.u.]	Max Val [a.u.]
C2-MAX_WT DIV2 neuron #4_all_1x3	N1	Default	Primary	Default	19.379	65.471	18.214	20	96
C2-MAX_WT DIV2 neuron #4_all_1x3	N2	Default	Primary	Default	21.261	64.641	21.95	13	109
C2-MAX_WT DIV2 neuron #4_all_1x3	N3	Default	Primary	Default	22.766	62.436	16.837	19	97
C2-MAX_WT DIV2 neuron #4_all_1x3	N4	Default	Primary	Default	85.737	76.913	23.157	26	144
C2-MAX_WT DIV2 neuron #4_all_1x3	N5	Default	Primary	Default	16.799	93.962	43.859	9	151
640 Groups
Image	Cluster	Type	Count	Sum Len [micron]	Mean Len [micron]	SD Len [micron]	Min Len [micron]	Max Len [micron]	Mean Val [a.u.]	SD Val [a.u.]	Min Val [a.u.]	Max Val [a.u.]
C2-MAX_WT DIV2 neuron #4_all_1x3	All	All	5	165.942	33.188	29.46	16.799	85.737	73.642	26.08	9	151
Image 4
WT DIV2 neuron #5_all
Electroporation efficency by measuring GFP efficency with "Minimum" ROI (only covering soma)
		Label	Area	Mean	Min	Max	BX	BY	Width	Height	IntDen	RawIntDen
488	1	C1-MAX_WT DIV2 neuron #5_all_1x1.nd2:WT DIV2 neuron #5_all_1x1_M...	76.409	103.334	74	255	17.467	12.133	31.333	30.267	7895.63	444129
640	2	C2-MAX_WT DIV2 neuron #5_all_1x1.nd2:WT DIV2 neuron #5_all_1x1_M...	76.409	74.921	2	207	17.467	12.133	31.333	30.267	5724.62	322010
405	3	C3-MAX_WT DIV2 neuron #5_all_1x1.nd2:WT DIV2 neuron #5_all_1x1_M...	76.409	48.621	3	125	17.467	12.133	31.333	30.267	3715.09	208974
640 Tracings
Image	Tracing	Cluster	Type	Label	Length [micron]	Mean Val [a.u.]	SD Val [a.u.]	Min Val [a.u.]	Max Val [a.u.]
C2-MAX_WT DIV2 neuron #5_all_1x1	N1	Default	Primary	Default	78.654	88.18	24.641	26	153
C2-MAX_WT DIV2 neuron #5_all_1x1	N2	Default	Primary	Default	12.308	50.453	17.98	21	88
C2-MAX_WT DIV2 neuron #5_all_1x1	N3	Default	Primary	Default	6.195	24.024	7.955	7	39
C2-MAX_WT DIV2 neuron #5_all_1x1	N4	Default	Primary	Default	11.762	44.577	15.628	13	73
C2-MAX_WT DIV2 neuron #5_all_1x1	N5	Default	Primary	Default	15.251	24.681	8.611	5	46
C2-MAX_WT DIV2 neuron #5_all_1x1	N6	Default	Primary	Default	18.376	32.06	15.261	6	71
640 Groups
Image	Cluster	Type	Count	Sum Len [micron]	Mean Len [micron]	SD Len [micron]	Min Len [micron]	Max Len [micron]	Mean Val [a.u.]	SD Val [a.u.]	Min Val [a.u.]	Max Val [a.u.]
C2-MAX_WT DIV2 neuron #5_all_1x1	All	All	6	142.547	23.758	27.197	6.195	78.654	63.901	34.155	5	153
Image 5
WT DIV2 neuron #6_all
Electroporation efficency by measuring GFP efficency with "Minimum" ROI (only covering soma)
		Label	Area	Mean	Min	Max	BX	BY	Width	Height	IntDen	RawIntDen
488	1	C1-MAX_WT DIV2 neuron #6_all_1x3.nd2:WT DIV2 neuron #6_all_1x3_M...	70.898	175.963	125	255	15.333	128.4	9.6	10	12475.4	701741
640	2	C2-MAX_WT DIV2 neuron #6_all_1x3.nd2:WT DIV2 neuron #6_all_1x3_M...	70.898	178.449	40	252	15.333	128.4	9.6	10	12651.6	711653
405	3	C3-MAX_WT DIV2 neuron #6_all_1x3.nd2:WT DIV2 neuron #6_all_1x3_M...	70.898	46.464	5	129	15.333	128.4	9.6	10	3294.2	185299
640 Tracings
Image	Tracing	Cluster	Type	Label	Length [micron]	Mean Val [a.u.]	SD Val [a.u.]	Min Val [a.u.]	Max Val [a.u.]
C2-MAX_WT DIV2 neuron #6_all_1x3	N1	Default	Primary	Default	23.031	62.337	20.583	27	99
C2-MAX_WT DIV2 neuron #6_all_1x3	N2	Default	Primary	Default	132.74	129.237	22.584	19	152
C2-MAX_WT DIV2 neuron #6_all_1x3	N3	Default	Primary	Default	9.834	131.958	16.353	74	149
C2-MAX_WT DIV2 neuron #6_all_1x3	N4	Default	Primary	Default	8.906	97.924	48.561	4	140
C2-MAX_WT DIV2 neuron #6_all_1x3	N5	Default	Primary	Default	11.737	69.421	38.495	17	126
C2-MAX_WT DIV2 neuron #6_all_1x3	N6	Default	Secondary	Default	9.637	75.099	15.693	36	106
640 Groups
Image	Cluster	Type	Count	Sum Len [micron]	Mean Len [micron]	SD Len [micron]	Min Len [micron]	Max Len [micron]	Mean Val [a.u.]	SD Val [a.u.]	Min Val [a.u.]	Max Val [a.u.]
C2-MAX_WT DIV2 neuron #6_all_1x3	All	All	6	195.885	32.648	49.319	8.906	132.74	113.479	36.278	4	152
Image 6
WT DIV2 neuron #7_all
Electroporation efficency by measuring GFP efficency with "Minimum" ROI (only covering soma)
		Label	Area	Mean	Min	Max	BX	BY	Width	Height	IntDen	RawIntDen
488	1	C1-MAX_WT DIV2 neuron #7_all_3x2.nd2:WT DIV2 neuron #7_all_3x2_M...	67.52	171.913	147	255	9.6	26.667	126.933	98.133	11607.6	652925
640	2	C2-MAX_WT DIV2 neuron #7_all_3x2.nd2:WT DIV2 neuron #7_all_3x2_M...	67.52	148.197	8	239	9.6	26.667	126.933	98.133	10006.3	562853
405	3	C3-MAX_WT DIV2 neuron #7_all_3x2.nd2:WT DIV2 neuron #7_all_3x2_M...	67.52	36.157	4	115	9.6	26.667	126.933	98.133	2441.3	137323
640 Tracings
Image	Tracing	Cluster	Type	Label	Length [micron]	Mean Val [a.u.]	SD Val [a.u.]	Min Val [a.u.]	Max Val [a.u.]
C2-MAX_WT DIV2 neuron #7_all_3x2	N1	Default	Primary	Default	9.674	80.817	41.242	17	139
C2-MAX_WT DIV2 neuron #7_all_3x2	N2	Default	Primary	Default	9.019	38.328	20.32	6	85
C2-MAX_WT DIV2 neuron #7_all_3x2	N3	Default	Primary	Default	15.92	124.934	15.404	78	143
C2-MAX_WT DIV2 neuron #7_all_3x2	N4	Default	Primary	Default	16.674	101.914	32.714	16	144
C2-MAX_WT DIV2 neuron #7_all_3x2	N5	Default	Primary	Default	172.666	124.625	25.102	1	148
C2-MAX_WT DIV2 neuron #7_all_3x2	N6	Default	Secondary	Default	16.321	110.925	20.253	62	138
640 Groups
Image	Cluster	Type	Count	Sum Len [micron]	Mean Len [micron]	SD Len [micron]	Min Len [micron]	Max Len [micron]	Mean Val [a.u.]	SD Val [a.u.]	Min Val [a.u.]	Max Val [a.u.]
C2-MAX_WT DIV2 neuron #7_all_3x2	All	All	6	240.274	40.046	65.06	9.019	172.666	116.886	31.873	1	148
Image 7
WT DIV2 neuron #8_all
Electroporation efficency by measuring GFP efficency with "Minimum" ROI (only covering soma)
		Label	Area	Mean	Min	Max	BX	BY	Width	Height	IntDen	RawIntDen
488	1	C1-MAX_WT DIV2 neuron #8_all_1x1.nd2:WT DIV2 neuron #8_all_1x1_M...	86.293	167.387	119	255	19.6	49.733	19.2	12.667	14444.4	812496
640	2	C2-MAX_WT DIV2 neuron #8_all_1x1.nd2:WT DIV2 neuron #8_all_1x1_M...	86.293	138.071	20	255	19.6	49.733	19.2	12.667	11914.6	670198
405	3	C3-MAX_WT DIV2 neuron #8_all_1x1.nd2:WT DIV2 neuron #8_all_1x1_M...	86.293	42.638	3	120	19.6	49.733	19.2	12.667	3679.34	206963
640 Tracings
Image	Tracing	Cluster	Type	Label	Length [micron]	Mean Val [a.u.]	SD Val [a.u.]	Min Val [a.u.]	Max Val [a.u.]
C2-MAX_WT DIV2 neuron #8_all_1x1	N1	Default	Primary	Default	19.969	44.178	16.328	6	76
C2-MAX_WT DIV2 neuron #8_all_1x1	N2	Default	Primary	Default	23.461	75.774	39.056	12	144
C2-MAX_WT DIV2 neuron #8_all_1x1	N3	Default	Primary	Default	15.425	64.91	26.58	10	101
C2-MAX_WT DIV2 neuron #8_all_1x1	N4	Default	Primary	Default	7.813	62.679	22.143	9	103
C2-MAX_WT DIV2 neuron #8_all_1x1	N5	Default	Primary	Default	23.879	97.126	45.759	10	153
C2-MAX_WT DIV2 neuron #8_all_1x1	N6	Default	Primary	Default	78.938	93.424	30.295	26	146
640 Groups
Image	Cluster	Type	Count	Sum Len [micron]	Mean Len [micron]	SD Len [micron]	Min Len [micron]	Max Len [micron]	Mean Val [a.u.]	SD Val [a.u.]	Min Val [a.u.]	Max Val [a.u.]
C2-MAX_WT DIV2 neuron #8_all_1x1	All	All	6	169.485	28.247	25.542	7.813	78.938	81.071	36.703	6	153
Image 8
WT DIV2 neuron #9_all
Electroporation efficency by measuring GFP efficency with "Minimum" ROI (only covering soma)
		Label	Area	Mean	Min	Max	BX	BY	Width	Height	IntDen	RawIntDen
488	1	C1-MAX_WT DIV2 neuron #9_all_1x2.nd2:WT DIV2 neuron #9_all_1x2_M...	89.831	175.595	121	255	19.2	35.733	22.267	56.667	15773.9	887284
640	2	C2-MAX_WT DIV2 neuron #9_all_1x2.nd2:WT DIV2 neuron #9_all_1x2_M...	89.831	149.558	24	249	19.2	35.733	22.267	56.667	13435	755716
405	3	C3-MAX_WT DIV2 neuron #9_all_1x2.nd2:WT DIV2 neuron #9_all_1x2_M...	89.831	40.003	4	91	19.2	35.733	22.267	56.667	3593.53	202136
640 Tracings
Image	Tracing	Cluster	Type	Label	Length [micron]	Mean Val [a.u.]	SD Val [a.u.]	Min Val [a.u.]	Max Val [a.u.]
C2-MAX_WT DIV2 neuron #9_all_1x2	N1	Default	Primary	Default	14.17	41.244	22.574	5	91
C2-MAX_WT DIV2 neuron #9_all_1x2	N2	Default	Primary	Default	110.248	130.417	21.334	38	152
C2-MAX_WT DIV2 neuron #9_all_1x2	N3	Default	Primary	Default	16.066	94.356	32.133	22	143
640 Groups
Image	Cluster	Type	Count	Sum Len [micron]	Mean Len [micron]	SD Len [micron]	Min Len [micron]	Max Len [micron]	Mean Val [a.u.]	SD Val [a.u.]	Min Val [a.u.]	Max Val [a.u.]
C2-MAX_WT DIV2 neuron #9_all_1x2	All	All	3	140.484	46.828	54.932	14.17	110.248	118.228	35.385	5	152
Image 9
WT DIV2 neuron #10_all
Electroporation efficency by measuring GFP efficency with "Minimum" ROI (only covering soma)
		Label	Area	Mean	Min	Max	BX	BY	Width	Height	IntDen	RawIntDen
488	1	C1-MAX_WT DIV2 neuron #10_all_3x2.nd2:WT DIV2 neuron #10_all_3x2_...	196.089	137.07	88	255	6.267	29.6	116.4	69.867	26877.8	1511879
640	2	C2-MAX_WT DIV2 neuron #10_all_3x2.nd2:WT DIV2 neuron #10_all_3x2_...	196.089	157.486	6	255	6.267	29.6	116.4	69.867	30881.2	1737069
405	3	C3-MAX_WT DIV2 neuron #10_all_3x2.nd2:WT DIV2 neuron #10_all_3x2_...	196.089	62.051	5	205	6.267	29.6	116.4	69.867	12167.6	684426
640 Tracings
Image	Tracing	Cluster	Type	Label	Length [micron]	Mean Val [a.u.]	SD Val [a.u.]	Min Val [a.u.]	Max Val [a.u.]
C2-MAX_WT DIV2 neuron #10_all_3x2	N1	Default	Primary	Default	36.669	119.363	26.109	43	146
C2-MAX_WT DIV2 neuron #10_all_3x2	N2	Default	Primary	Default	23.157	124.954	32.173	19	146
C2-MAX_WT DIV2 neuron #10_all_3x2	N3	Default	Primary	Default	11.423	83.023	46.38	14	142
C2-MAX_WT DIV2 neuron #10_all_3x2	N4	Default	Primary	Default	105.766	131.922	21.758	23	153
C2-MAX_WT DIV2 neuron #10_all_3x2	N5	Default	Primary	Default	14.988	73.347	50.844	5	143
C2-MAX_WT DIV2 neuron #10_all_3x2	N6	Default	Secondary	Default	6.342	18.805	28.46	2	83
C2-MAX_WT DIV2 neuron #10_all_3x2	N7	Default	Secondary	Default	14.241	92.242	44.095	20	144
640 Groups
Image	Cluster	Type	Count	Sum Len [micron]	Mean Len [micron]	SD Len [micron]	Min Len [micron]	Max Len [micron]	Mean Val [a.u.]	SD Val [a.u.]	Min Val [a.u.]	Max Val [a.u.]
C2-MAX_WT DIV2 neuron #10_all_3x2	All	All	7	212.587	30.37	34.663	6.342	105.766	116.046	39.476	2	153
Image 10
WT DIV2 neuron #11_all
Electroporation efficency by measuring GFP efficency with "Minimum" ROI (only covering soma)
		Label	Area	Mean	Min	Max	BX	BY	Width	Height	IntDen	RawIntDen
488	1	C1-MAX_WT DIV2 neuron #11_all_2x1.nd2:WT DIV2 neuron #11_all_2x1_...	153.991	141.396	87	255	36.667	16.133	89.6	52.133	21773.7	1224769
640	2	C2-MAX_WT DIV2 neuron #11_all_2x1.nd2:WT DIV2 neuron #11_all_2x1_...	153.991	132.028	15	252	36.667	16.133	89.6	52.133	20331.2	1143629
405	3	C3-MAX_WT DIV2 neuron #11_all_2x1.nd2:WT DIV2 neuron #11_all_2x1_...	153.991	46.683	4	186	36.667	16.133	89.6	52.133	7188.76	404368
640 Tracings
Image	Tracing	Cluster	Type	Label	Length [micron]	Mean Val [a.u.]	SD Val [a.u.]	Min Val [a.u.]	Max Val [a.u.]
C2-MAX_WT DIV2 neuron #11_all_2x1	N1	Default	Primary	Default	6.318	37.261	28.382	10	127
C2-MAX_WT DIV2 neuron #11_all_2x1	N2	Default	Primary	Default	81.019	129.498	20.45	57	151
C2-MAX_WT DIV2 neuron #11_all_2x1	N3	Default	Primary	Default	9.038	45.541	22.54	10	84
C2-MAX_WT DIV2 neuron #11_all_2x1	N4	Default	Primary	Default	8.205	113.508	29.88	44	148
640 Groups
Image	Cluster	Type	Count	Sum Len [micron]	Mean Len [micron]	SD Len [micron]	Min Len [micron]	Max Len [micron]	Mean Val [a.u.]	SD Val [a.u.]	Min Val [a.u.]	Max Val [a.u.]
C2-MAX_WT DIV2 neuron #11_all_2x1	All	All	4	104.581	26.145	36.601	6.318	81.019	114.599	38.416	10	151
Image 11
WT DIV2 neuron #12_all
Electroporation efficency by measuring GFP efficency with "Minimum" ROI (only covering soma)
		Label	Area	Mean	Min	Max	BX	BY	Width	Height	IntDen	RawIntDen
488	1	C1-MAX_WT DIV2 neuron #12_all_1x3.nd2:WT DIV2 neuron #12_all_1x3_...	66.169	10.705	9	255	27.867	12.8	36.133	90.267	708.32	39843
640	2	C2-MAX_WT DIV2 neuron #12_all_1x3.nd2:WT DIV2 neuron #12_all_1x3_...	66.169	52.262	1	246	27.867	12.8	36.133	90.267	3458.1	194518
405	3	C3-MAX_WT DIV2 neuron #12_all_1x3.nd2:WT DIV2 neuron #12_all_1x3_...	66.169	39.711	3	197	27.867	12.8	36.133	90.267	2627.64	147805
640 Tracings
Image	Tracing	Cluster	Type	Label	Length [micron]	Mean Val [a.u.]	SD Val [a.u.]	Min Val [a.u.]	Max Val [a.u.]
C2-MAX_WT DIV2 neuron #12_all_1x3	N1	Default	Primary	Default	9.962	12.028	4.893	2	21
C2-MAX_WT DIV2 neuron #12_all_1x3	N2	Default	Primary	Default	14.219	25.604	11.876	4	50
C2-MAX_WT DIV2 neuron #12_all_1x3	N3	Default	Primary	Default	10.692	12.076	8.041	2	33
C2-MAX_WT DIV2 neuron #12_all_1x3	N4	Default	Primary	Default	9.586	15.704	6.422	5	30
C2-MAX_WT DIV2 neuron #12_all_1x3	N5	Default	Primary	Default	13.999	33.462	6.103	15	47
C2-MAX_WT DIV2 neuron #12_all_1x3	N6	Default	Primary	Default	92.485	79.067	31.226	1	153
C2-MAX_WT DIV2 neuron #12_all_1x3	N7	Default	Primary	Default	5.429	10.833	4.359	4	19
C2-MAX_WT DIV2 neuron #12_all_1x3	N8	Default	Primary	Default	12.849	15.626	7.244	2	28
C2-MAX_WT DIV2 neuron #12_all_1x3	N9	Default	Primary	Default	9.286	11.788	6.103	2	23
C2-MAX_WT DIV2 neuron #12_all_1x3	N10	Default	Secondary	Default	10.155	17.379	7.781	4	29
640 Groups
Image	Cluster	Type	Count	Sum Len [micron]	Mean Len [micron]	SD Len [micron]	Min Len [micron]	Max Len [micron]	Mean Val [a.u.]	SD Val [a.u.]	Min Val [a.u.]	Max Val [a.u.]
C2-MAX_WT DIV2 neuron #12_all_1x3	All	All	10	188.661	18.866	25.995	5.429	92.485	47.723	37.969	1	153
Image 12
WT DIV2 neuron #13_all
Electroporation efficency by measuring GFP efficency with "Minimum" ROI (only covering soma)
		Label	Area	Mean	Min	Max	BX	BY	Width	Height	IntDen	RawIntDen
488	1	C1-MAX_WT DIV2 neuron #13_all_2x1.nd2:WT DIV2 neuron #13_all_2x1_...	69.173	150.381	118	255	25.333	0	97.733	68.267	10402.3	585132
640	2	C2-MAX_WT DIV2 neuron #13_all_2x1.nd2:WT DIV2 neuron #13_all_2x1_...	69.173	61.526	5	239	25.333	0	97.733	68.267	4255.98	239399
405	3	C3-MAX_WT DIV2 neuron #13_all_2x1.nd2:WT DIV2 neuron #13_all_2x1_...	69.173	40.887	3	119	25.333	0	97.733	68.267	2828.32	159093
640 Tracings
Image	Tracing	Cluster	Type	Label	Length [micron]	Mean Val [a.u.]	SD Val [a.u.]	Min Val [a.u.]	Max Val [a.u.]
C2-MAX_WT DIV2 neuron #13_all_2x1	N1	Default	Primary	Default	126.507	81.189	34.825	1	153
C2-MAX_WT DIV2 neuron #13_all_2x1	N2	Default	Primary	Default	6.424	21.457	8.899	9	38
C2-MAX_WT DIV2 neuron #13_all_2x1	N3	Default	Primary	Default	4.194	17	5.978	6	25
C2-MAX_WT DIV2 neuron #13_all_2x1	N4	Default	Primary	Default	12.213	22.776	12.024	4	56
C2-MAX_WT DIV2 neuron #13_all_2x1	N5	Default	Secondary	Default	14.387	22.792	8.699	9	47
640 Groups
Image	Cluster	Type	Count	Sum Len [micron]	Mean Len [micron]	SD Len [micron]	Min Len [micron]	Max Len [micron]	Mean Val [a.u.]	SD Val [a.u.]	Min Val [a.u.]	Max Val [a.u.]
C2-MAX_WT DIV2 neuron #13_all_2x1	All	All	5	163.725	32.745	52.578	4.194	126.507	66.827	39.851	1	153
Image 13
WT DIV2 neuron #14_all
Electroporation efficency by measuring GFP efficency with "Minimum" ROI (only covering soma)
		Label	Area	Mean	Min	Max	BX	BY	Width	Height	IntDen	RawIntDen
488	1	C1-MAX_WT DIV2 neuron #14_all_2x2.nd2:WT DIV2 neuron #14_all_2x2_...	99.733	165.619	131	255	38.933	41.467	44.133	45.067	16517.8	929124
640	2	C2-MAX_WT DIV2 neuron #14_all_2x2.nd2:WT DIV2 neuron #14_all_2x2_...	99.733	106.959	11	250	38.933	41.467	44.133	45.067	10667.3	600038
405	3	C3-MAX_WT DIV2 neuron #14_all_2x2.nd2:WT DIV2 neuron #14_all_2x2_...	99.733	55.996	5	198	38.933	41.467	44.133	45.067	5584.69	314139
640 Tracings
Image	Tracing	Cluster	Type	Label	Length [micron]	Mean Val [a.u.]	SD Val [a.u.]	Min Val [a.u.]	Max Val [a.u.]
C2-MAX_WT DIV2 neuron #14_all_2x2	N1	Default	Primary	Default	25.942	81.254	29.14	11	134
C2-MAX_WT DIV2 neuron #14_all_2x2	N2	Default	Primary	Default	21.968	72.28	34.843	12	138
C2-MAX_WT DIV2 neuron #14_all_2x2	N3	Default	Primary	Default	93.498	126.473	34.857	2	152
C2-MAX_WT DIV2 neuron #14_all_2x2	N4	Default	Primary	Default	42.814	121.601	30.951	15	153
C2-MAX_WT DIV2 neuron #14_all_2x2	N5	Default	Primary	Default	16.731	57.793	23.286	5	92
640 Groups
Image	Cluster	Type	Count	Sum Len [micron]	Mean Len [micron]	SD Len [micron]	Min Len [micron]	Max Len [micron]	Mean Val [a.u.]	SD Val [a.u.]	Min Val [a.u.]	Max Val [a.u.]
C2-MAX_WT DIV2 neuron #14_all_2x2	All	All	5	200.953	40.191	31.361	16.731	93.498	106.814	41.357	2	153
Image 14
WT DIV2 neuron #15_all
Electroporation efficency by measuring GFP efficency with "Minimum" ROI (only covering soma)
		Label	Area	Mean	Min	Max	BX	BY	Width	Height	IntDen	RawIntDen
488	1	C1-MAX_WT DIV2 neuron #15_all_1x2.nd2:WT DIV2 neuron #15_all_1x2_...	120.782	109.345	79	255	18.667	45.6	47.467	54.4	13207	742892
640	2	C2-MAX_WT DIV2 neuron #15_all_1x2.nd2:WT DIV2 neuron #15_all_1x2_...	120.782	65.888	9	255	18.667	45.6	47.467	54.4	7958.08	447642
405	3	C3-MAX_WT DIV2 neuron #15_all_1x2.nd2:WT DIV2 neuron #15_all_1x2_...	120.782	52.893	3	129	18.667	45.6	47.467	54.4	6388.52	359354
640 Tracings
Image	Tracing	Cluster	Type	Label	Length [micron]	Mean Val [a.u.]	SD Val [a.u.]	Min Val [a.u.]	Max Val [a.u.]
C2-MAX_WT DIV2 neuron #15_all_1x2	N1	Default	Primary	Default	83.951	79.233	30.692	8	143
C2-MAX_WT DIV2 neuron #15_all_1x2	N2	Default	Primary	Default	8.559	29.061	11.57	11	47
C2-MAX_WT DIV2 neuron #15_all_1x2	N3	Default	Primary	Default	18.434	40.24	17.217	8	79
C2-MAX_WT DIV2 neuron #15_all_1x2	N4	Default	Primary	Default	7.166	18.87	11.395	5	49
C2-MAX_WT DIV2 neuron #15_all_1x2	N5	Default	Primary	Default	14.105	24.396	9.673	7	48
C2-MAX_WT DIV2 neuron #15_all_1x2	N6	Default	Secondary	Default	5.413	19.439	5.814	11	37
640 Groups
Image	Cluster	Type	Count	Sum Len [micron]	Mean Len [micron]	SD Len [micron]	Min Len [micron]	Max Len [micron]	Mean Val [a.u.]	SD Val [a.u.]	Min Val [a.u.]	Max Val [a.u.]
C2-MAX_WT DIV2 neuron #15_all_1x2	All	All	6	137.628	22.938	30.277	5.413	83.951	59.092	35.476	5	143
Image 15
WT DIV2 neuron #16_all
Electroporation efficency by measuring GFP efficency with "Minimum" ROI (only covering soma)
		Label	Area	Mean	Min	Max	BX	BY	Width	Height	IntDen	RawIntDen
488	1	C1-MAX_WT DIV2 neuron #16_all_2x1.nd2:WT DIV2 neuron #16_all_2x1_...	60.604	163.893	118	255	39.333	16.8	49.067	10	9932.64	558711
640	2	C2-MAX_WT DIV2 neuron #16_all_2x1.nd2:WT DIV2 neuron #16_all_2x1_...	60.604	109.952	20	248	39.333	16.8	49.067	10	6663.61	374828
405	3	C3-MAX_WT DIV2 neuron #16_all_2x1.nd2:WT DIV2 neuron #16_all_2x1_...	60.604	68.636	8	156	39.333	16.8	49.067	10	4159.63	233979
640 Tracings
Image	Tracing	Cluster	Type	Label	Length [micron]	Mean Val [a.u.]	SD Val [a.u.]	Min Val [a.u.]	Max Val [a.u.]
C2-MAX_WT DIV2 neuron #16_all_2x1	N1	Default	Primary	Default	23.348	96.05	40.36	21	149
C2-MAX_WT DIV2 neuron #16_all_2x1	N2	Default	Primary	Default	12.283	72.656	16.666	25	142
C2-MAX_WT DIV2 neuron #16_all_2x1	N3	Default	Primary	Default	86.305	122.447	26.128	30	153
C2-MAX_WT DIV2 neuron #16_all_2x1	N4	Default	Primary	Default	12.81	31.704	14.044	9	56
640 Groups
Image	Cluster	Type	Count	Sum Len [micron]	Mean Len [micron]	SD Len [micron]	Min Len [micron]	Max Len [micron]	Mean Val [a.u.]	SD Val [a.u.]	Min Val [a.u.]	Max Val [a.u.]
C2-MAX_WT DIV2 neuron #16_all_2x1	All	All	4	134.746	33.687	35.448	12.283	86.305	104.912	39.302	9	153
Image 16
WT DIV2 neuron #17_all
Electroporation efficency by measuring GFP efficency with "Minimum" ROI (only covering soma)
		Label	Area	Mean	Min	Max	BX	BY	Width	Height	IntDen	RawIntDen
488	1	C1-MAX_WT DIV2 neuron #17_all_1x1.nd2:WT DIV2 neuron #17_all_1x1_...	83.378	150.286	92	255	44.533	3.467	22.267	58.4	12530.5	704843
640	2	C2-MAX_WT DIV2 neuron #17_all_1x1.nd2:WT DIV2 neuron #17_all_1x1_...	83.378	135.351	9	255	44.533	3.467	22.267	58.4	11285.2	634795
405	3	C3-MAX_WT DIV2 neuron #17_all_1x1.nd2:WT DIV2 neuron #17_all_1x1_...	83.378	98.705	8	255	44.533	3.467	22.267	58.4	8229.78	462925
640 Tracings
Image	Tracing	Cluster	Type	Label	Length [micron]	Mean Val [a.u.]	SD Val [a.u.]	Min Val [a.u.]	Max Val [a.u.]
C2-MAX_WT DIV2 neuron #17_all_1x1	N1	Default	Primary	Default	27.482	103.867	38.729	11	149
C2-MAX_WT DIV2 neuron #17_all_1x1	N2	Default	Primary	Default	11.981	63.235	27.841	22	121
C2-MAX_WT DIV2 neuron #17_all_1x1	N3	Default	Primary	Default	8.237	45.839	22.192	13	88
C2-MAX_WT DIV2 neuron #17_all_1x1	N4	Default	Primary	Default	102.902	118.977	35.038	8	153
640 Groups
Image	Cluster	Type	Count	Sum Len [micron]	Mean Len [micron]	SD Len [micron]	Min Len [micron]	Max Len [micron]	Mean Val [a.u.]	SD Val [a.u.]	Min Val [a.u.]	Max Val [a.u.]
C2-MAX_WT DIV2 neuron #17_all_1x1	All	All	4	150.602	37.651	44.292	8.237	102.902	107.897	40.662	8	153
Image 17
WT DIV2 neuron #18_all
Electroporation efficency by measuring GFP efficency with "Minimum" ROI (only covering soma)
		Label	Area	Mean	Min	Max	BX	BY	Width	Height	IntDen	RawIntDen
488	1	C1-MAX_WT DIV2 neuron #18_all_2x2.nd2:WT DIV2 neuron #18_all_2x2_...	73.689	167.375	103	255	74.267	90.533	14.133	8.8	12333.7	693770
640	2	C2-MAX_WT DIV2 neuron #18_all_2x2.nd2:WT DIV2 neuron #18_all_2x2_...	73.689	164.698	29	249	74.267	90.533	14.133	8.8	12136.4	682672
405	3	C3-MAX_WT DIV2 neuron #18_all_2x2.nd2:WT DIV2 neuron #18_all_2x2_...	73.689	60.64	9	134	74.267	90.533	14.133	8.8	4468.52	251354
640 Tracings
Image	Tracing	Cluster	Type	Label	Length [micron]	Mean Val [a.u.]	SD Val [a.u.]	Min Val [a.u.]	Max Val [a.u.]
C2-MAX_WT DIV2 neuron #18_all_2x2	N1	Default	Primary	Default	17.112	107.874	41.928	20	149
C2-MAX_WT DIV2 neuron #18_all_2x2	N2	Default	Primary	Default	4.487	60.944	32.019	11	128
C2-MAX_WT DIV2 neuron #18_all_2x2	N3	Default	Primary	Default	2.817	49.333	8.12	35	67
C2-MAX_WT DIV2 neuron #18_all_2x2	N4	Default	Primary	Default	5.357	59.194	22.284	17	91
C2-MAX_WT DIV2 neuron #18_all_2x2	N5	Default	Primary	Default	95.67	134.682	18.646	26	153
C2-MAX_WT DIV2 neuron #18_all_2x2	N6	Default	Secondary	Default	11.891	42.877	19.102	7	83
640 Groups
Image	Cluster	Type	Count	Sum Len [micron]	Mean Len [micron]	SD Len [micron]	Min Len [micron]	Max Len [micron]	Mean Val [a.u.]	SD Val [a.u.]	Min Val [a.u.]	Max Val [a.u.]
C2-MAX_WT DIV2 neuron #18_all_2x2	All	All	6	137.335	22.889	36.056	2.817	95.67	115.904	39.912	7	153
Image 18
WT DIV2 neuron #20_all
Electroporation efficency by measuring GFP efficency with "Minimum" ROI (only covering soma)
		Label	Area	Mean	Min	Max	BX	BY	Width	Height	IntDen	RawIntDen
488	1	C1-MAX_WT DIV2 neuron #20_all_1x1.nd2:WT DIV2 neuron #20_all_1x1_...	70.293	162.77	117	255	17.6	48.533	9.733	10.8	11441.7	643594
640	2	C2-MAX_WT DIV2 neuron #20_all_1x1.nd2:WT DIV2 neuron #20_all_1x1_...	70.293	146.58	18	251	17.6	48.533	9.733	10.8	10303.6	579576
405	3	C3-MAX_WT DIV2 neuron #20_all_1x1.nd2:WT DIV2 neuron #20_all_1x1_...	70.293	45.458	3	120	17.6	48.533	9.733	10.8	3195.4	179741
640 Tracings
Image	Tracing	Cluster	Type	Label	Length [micron]	Mean Val [a.u.]	SD Val [a.u.]	Min Val [a.u.]	Max Val [a.u.]
C2-MAX_WT DIV2 neuron #20_all_1x1	N1	Default	Primary	Default	11.338	58.789	30.449	4	122
C2-MAX_WT DIV2 neuron #20_all_1x1	N2	Default	Primary	Default	59.598	135.105	12.836	35	150
C2-MAX_WT DIV2 neuron #20_all_1x1	N3	Default	Primary	Default	29.36	106.523	34.108	22	143
C2-MAX_WT DIV2 neuron #20_all_1x1	N4	Default	Primary	Default	12.358	88.753	41.203	13	140
C2-MAX_WT DIV2 neuron #20_all_1x1	N5	Default	Primary	Default	4.818	57.306	14.069	31	79
C2-MAX_WT DIV2 neuron #20_all_1x1	N6	Default	Primary	Default	4.726	50.226	15.381	18	86
C2-MAX_WT DIV2 neuron #20_all_1x1	N7	Default	Primary	Default	15.849	118.575	27.756	38	140
C2-MAX_WT DIV2 neuron #20_all_1x1	N8	Default	Primary	Default	10.559	51.873	23.132	13	112
C2-MAX_WT DIV2 neuron #20_all_1x1	N9	Default	Secondary	Default	4.183	41.385	24.108	11	94
C2-MAX_WT DIV2 neuron #20_all_1x1	N10	Default	Secondary	Default	12.312	96.637	32.529	32	143
C2-MAX_WT DIV2 neuron #20_all_1x1	N11	Default	Secondary	Default	6.593	62.87	37.08	13	139
640 Groups
Image	Cluster	Type	Count	Sum Len [micron]	Mean Len [micron]	SD Len [micron]	Min Len [micron]	Max Len [micron]	Mean Val [a.u.]	SD Val [a.u.]	Min Val [a.u.]	Max Val [a.u.]
C2-MAX_WT DIV2 neuron #20_all_1x1	All	All	11	171.694	15.609	16.236	4.183	59.598	102.492	40.74	4	150

[truncated: 8 more sheets: V409I DIV2 (2), V409A DIV2 (2), WT DIV1 (3), V409I DIV1 (3), V409A DIV1 (3), WT DIV2 (3), V409I DIV2 (3), V409A DIV2 (3)]
