# Supplementary material for: TUBA1A tubulinopathy mutants disrupt neuron morphogenesis and override XMAP215/Stu2 regulation of microtubule dynamics
Source: eLife. 2022 May 5;11:e76189. doi: 10.7554/eLife.76189 (PMC9236607; doi:10.7554/eLife.76189)
Supplement: Figure 2—source data 2. [file elife-76189-fig2-data2.xlsx]

## Sheet: WT
03.02.22
30sec_15min_0.6um step 6um
Soma x, y: x=13.4(32), y=61.12(146)							Branch point x, y: x=121.82(291), y=130.61(312)							Branch point x, y: x=131.45(314), y=180.01(430)
	Label	Length	Time (min)	Rate (um/min)	Frames of growth, retraction, or pause			Label	Length	Time (min)	Rate (um/min)	Frames of growth, retraction, or pause			Label	Length	Time (min)	Rate (um/min)	Frames of growth, retraction, or pause
1	MAX_30sec_15min_0.6um step 6um.nd2:1	21.857	0				1	MAX_30sec_15min_0.6um step 6um.nd2:1	31.106	0				1	MAX_30sec_15min_0.6um step 6um.nd2:1	17.493	0
2	MAX_30sec_15min_0.6um step 6um.nd2:2	23.751	0.5	3.788	0.5+		2	MAX_30sec_15min_0.6um step 6um.nd2:2	29.513	0.5	-3.186			2	MAX_30sec_15min_0.6um step 6um.nd2:2	13.779	0.5	-7.428
3	MAX_30sec_15min_0.6um step 6um.nd2:3	20.637	1	-6.228	0.5-		3	MAX_30sec_15min_0.6um step 6um.nd2:3	28.927	1	-1.172			3	MAX_30sec_15min_0.6um step 6um.nd2:3	11.134	1	-5.29	1-
4	MAX_30sec_15min_0.6um step 6um.nd2:4	21.423	1.5	1.572			4	MAX_30sec_15min_0.6um step 6um.nd2:4	27.686	1.5	-2.482			4	MAX_30sec_15min_0.6um step 6um.nd2:4	12.268	1.5	2.268
5	MAX_30sec_15min_0.6um step 6um.nd2:5	21.679	2	0.512	1+		5	MAX_30sec_15min_0.6um step 6um.nd2:5	25.389	2	-4.594	2-		5	MAX_30sec_15min_0.6um step 6um.nd2:5	12.628	2	0.72
6	MAX_30sec_15min_0.6um step 6um.nd2:6	21.679	2.5	0			6	MAX_30sec_15min_0.6um step 6um.nd2:6	26.778	2.5	2.778			6	MAX_30sec_15min_0.6um step 6um.nd2:6	14.851	2.5	4.446
7	MAX_30sec_15min_0.6um step 6um.nd2:7	21.679	3	0			7	MAX_30sec_15min_0.6um step 6um.nd2:7	27.026	3	0.496	1+		7	MAX_30sec_15min_0.6um step 6um.nd2:7	16.269	3	2.836
8	MAX_30sec_15min_0.6um step 6um.nd2:8	21.679	3.5	0	1.5/		8	MAX_30sec_15min_0.6um step 6um.nd2:8	26.838	3.5	-0.376			8	MAX_30sec_15min_0.6um step 6um.nd2:8	18.49	3.5	4.442	2.5+
9	MAX_30sec_15min_0.6um step 6um.nd2:9	22.586	4	1.814	0.5+		9	MAX_30sec_15min_0.6um step 6um.nd2:9	26.079	4	-1.518	1-		9	MAX_30sec_15min_0.6um step 6um.nd2:9	17.119	4	-2.742
10	MAX_30sec_15min_0.6um step 6um.nd2:10	22.586	4.5	0	0.5/		10	MAX_30sec_15min_0.6um step 6um.nd2:10	26.104	4.5	0.05			10	MAX_30sec_15min_0.6um step 6um.nd2:10	16.687	4.5	-0.864	1-
11	MAX_30sec_15min_0.6um step 6um.nd2:11	23.71	5	2.248	0.5+		11	MAX_30sec_15min_0.6um step 6um.nd2:11	26.611	5	1.014	1+		11	MAX_30sec_15min_0.6um step 6um.nd2:11	17.585	5	1.796
12	MAX_30sec_15min_0.6um step 6um.nd2:12	22.045	5.5	-3.33			12	MAX_30sec_15min_0.6um step 6um.nd2:12	26.611	5.5	0	0.5/		12	MAX_30sec_15min_0.6um step 6um.nd2:12	19.485	5.5	3.8	1+
13	MAX_30sec_15min_0.6um step 6um.nd2:13	21.79	6	-0.51			13	MAX_30sec_15min_0.6um step 6um.nd2:13	25.963	6	-1.296			13	MAX_30sec_15min_0.6um step 6um.nd2:13	18.999	6	-0.972	0.5-
14	MAX_30sec_15min_0.6um step 6um.nd2:14	20.594	6.5	-2.392	1.5-		14	MAX_30sec_15min_0.6um step 6um.nd2:14	25.773	6.5	-0.38			14	MAX_30sec_15min_0.6um step 6um.nd2:14	21.361	6.5	4.724	0.5+
15	MAX_30sec_15min_0.6um step 6um.nd2:15	20.594	7	0	0.5/		15	MAX_30sec_15min_0.6um step 6um.nd2:15	25.518	7	-0.51	1.5-		15	MAX_30sec_15min_0.6um step 6um.nd2:15	20.954	7	-0.814	0.5-
16	MAX_30sec_15min_0.6um step 6um.nd2:16	22.716	7.5	4.244			16	MAX_30sec_15min_0.6um step 6um.nd2:16	26.328	7.5	1.62	0.5+		16	MAX_30sec_15min_0.6um step 6um.nd2:16	23.719	7.5	5.53
17	MAX_30sec_15min_0.6um step 6um.nd2:17	23.767	8	2.102	1+		17	MAX_30sec_15min_0.6um step 6um.nd2:17	25.453	8	-1.75			17	MAX_30sec_15min_0.6um step 6um.nd2:17	24.011	8	0.584	1+
18	MAX_30sec_15min_0.6um step 6um.nd2:18	22.748	8.5	-2.038			18	MAX_30sec_15min_0.6um step 6um.nd2:18	24.312	8.5	-2.282			18	MAX_30sec_15min_0.6um step 6um.nd2:18	23.666	8.5	-0.69	0.5-
19	MAX_30sec_15min_0.6um step 6um.nd2:19	21.164	9	-3.168	1-		19	MAX_30sec_15min_0.6um step 6um.nd2:19	24.31	9	-0.004	1.5-		19	MAX_30sec_15min_0.6um step 6um.nd2:19	23.666	9	0	0.5/
20	MAX_30sec_15min_0.6um step 6um.nd2:20	21.164	9.5	0			20	MAX_30sec_15min_0.6um step 6um.nd2:20	24.761	9.5	0.902	0.5+		20	MAX_30sec_15min_0.6um step 6um.nd2:20	20.947	9.5	-5.438	0.5-
21	MAX_30sec_15min_0.6um step 6um.nd2:21	21.164	10	0	1/		21	MAX_30sec_15min_0.6um step 6um.nd2:23	24.761	10	0	0.5/		21	MAX_30sec_15min_0.6um step 6um.nd2:21	20.947	10	0
22	MAX_30sec_15min_0.6um step 6um.nd2:22	20.817	10.5	-0.694			22	MAX_30sec_15min_0.6um step 6um.nd2:24	24.743	10.5	-0.036			22	MAX_30sec_15min_0.6um step 6um.nd2:22	20.947	10.5	0	1/
23	MAX_30sec_15min_0.6um step 6um.nd2:23	20.78	11	-0.074			23	MAX_30sec_15min_0.6um step 6um.nd2:25	23.932	11	-1.622	1-		23	MAX_30sec_15min_0.6um step 6um.nd2:23	21.504	11	1.114	0.5+
24	MAX_30sec_15min_0.6um step 6um.nd2:24	20.157	11.5	-1.246	1.5-									24	MAX_30sec_15min_0.6um step 6um.nd2:24	20.351	11.5	-2.306
25	MAX_30sec_15min_0.6um step 6um.nd2:25	21.951	12	3.588										25	MAX_30sec_15min_0.6um step 6um.nd2:25	20.196	12	-0.31	1-
26	MAX_30sec_15min_0.6um step 6um.nd2:26	22.946	12.5	1.99	1+									26	MAX_30sec_15min_0.6um step 6um.nd2:26	20.196	12.5	0
27	MAX_30sec_15min_0.6um step 6um.nd2:27	19.472	13	-6.948	0.5-									27	MAX_30sec_15min_0.6um step 6um.nd2:27	20.196	13	0	1/
28	MAX_30sec_15min_0.6um step 6um.nd2:28	20.295	13.5	1.646										28	MAX_30sec_15min_0.6um step 6um.nd2:28	17.602	13.5	-5.188
29	MAX_30sec_15min_0.6um step 6um.nd2:29	21.366	14	2.142	1+									29	MAX_30sec_15min_0.6um step 6um.nd2:29	16.368	14	-2.468	1-
30sec_15min_1um step 6um_001
Soma x, y: x=42.28(101), y=93.35(223)							Soma x, y: x=198.01(473), y=60.7(145)
	Label	Length	Time (min)	Rate (um/min)	Frames of growth, retraction, or pause			Label	Length	Time (min)	Rate (um/min)	Frames of growth, retraction, or pause
1	MAX_30sec_15min_1um step 6um_001.nd2:1	28.698	0				1	MAX_30sec_15min_1um step 6um_001.nd2:1	24.025	0
2	MAX_30sec_15min_1um step 6um_001.nd2:2	33.538	0.5	9.68	0.5+		2	MAX_30sec_15min_1um step 6um_001.nd2:2	22.939	0.5	-2.172	0.5-
3	MAX_30sec_15min_1um step 6um_001.nd2:3	32.494	1	-2.088	0.5-		3	MAX_30sec_15min_1um step 6um_001.nd2:3	22.939	1	0	0.5/
4	MAX_30sec_15min_1um step 6um_001.nd2:4	32.494	1.5	0			4	MAX_30sec_15min_1um step 6um_001.nd2:4	20.215	1.5	-5.448
5	MAX_30sec_15min_1um step 6um_001.nd2:5	32.494	2	0			5	MAX_30sec_15min_1um step 6um_001.nd2:5	18.433	2	-3.564	1-
6	MAX_30sec_15min_1um step 6um_001.nd2:6	32.494	2.5	0			6	MAX_30sec_15min_1um step 6um_001.nd2:6	18.433	2.5	0	0.5/
7	MAX_30sec_15min_1um step 6um_001.nd2:7	32.494	3	0			7	MAX_30sec_15min_1um step 6um_001.nd2:7	20.098	3	3.33
8	MAX_30sec_15min_1um step 6um_001.nd2:8	32.494	3.5	0	2.5/		8	MAX_30sec_15min_1um step 6um_001.nd2:8	20.724	3.5	1.252
9	MAX_30sec_15min_1um step 6um_001.nd2:9	33.731	4	2.474	0.5+		9	MAX_30sec_15min_1um step 6um_001.nd2:9	20.97	4	0.492	1.5+
10	MAX_30sec_15min_1um step 6um_001.nd2:10	33.731	4.5	0			10	MAX_30sec_15min_1um step 6um_001.nd2:10	20.884	4.5	-0.172	0.5-
11	MAX_30sec_15min_1um step 6um_001.nd2:11	33.731	5	0			11	MAX_30sec_15min_1um step 6um_001.nd2:11	20.884	5	0	0.5/
12	MAX_30sec_15min_1um step 6um_001.nd2:12	33.731	5.5	0	1.5/		12	MAX_30sec_15min_1um step 6um_001.nd2:12	23.3	5.5	4.832
13	MAX_30sec_15min_1um step 6um_001.nd2:13	31.413	6	-4.636			13	MAX_30sec_15min_1um step 6um_001.nd2:13	23.876	6	1.152	1+
14	MAX_30sec_15min_1um step 6um_001.nd2:14	27.492	6.5	-7.842			14	MAX_30sec_15min_1um step 6um_001.nd2:14	23.73	6.5	-0.292
15	MAX_30sec_15min_1um step 6um_001.nd2:15	24.199	7	-6.586			15	MAX_30sec_15min_1um step 6um_001.nd2:15	23.054	7	-1.352	1-
16	MAX_30sec_15min_1um step 6um_001.nd2:16	23.644	7.5	-1.11	2-		16	MAX_30sec_15min_1um step 6um_001.nd2:16	23.054	7.5	0	0.5/
17	MAX_30sec_15min_1um step 6um_001.nd2:17	24.325	8	1.362	0.5+		17	MAX_30sec_15min_1um step 6um_001.nd2:17	19.311	8	-7.486	0.5-
18	MAX_30sec_15min_1um step 6um_001.nd2:18	24.325	8.5	0	0.5/		18	MAX_30sec_15min_1um step 6um_001.nd2:18	19.311	8.5	0	0.5/
19	MAX_30sec_15min_1um step 6um_001.nd2:19	25.669	9	2.688	0.5+		19	MAX_30sec_15min_1um step 6um_001.nd2:19	18.158	9	-2.306	0.5-
20	MAX_30sec_15min_1um step 6um_001.nd2:20	24.306	9.5	-2.726	0.5-		20	MAX_30sec_15min_1um step 6um_001.nd2:20	20.106	9.5	3.896	0.5+
21	MAX_30sec_15min_1um step 6um_001.nd2:21	24.306	10	0	0.5/		21	MAX_30sec_15min_1um step 6um_001.nd2:21	20.106	10	0	0.5/
22	MAX_30sec_15min_1um step 6um_001.nd2:22	21.843	10.5	-4.926	0.5-		22	MAX_30sec_15min_1um step 6um_001.nd2:22	18.388	10.5	-3.436	0.5-
							23	MAX_30sec_15min_1um step 6um_001.nd2:23	18.388	11	0	0.5/
							24	MAX_30sec_15min_1um step 6um_001.nd2:24	17.318	11.5	-2.14
							25	MAX_30sec_15min_1um step 6um_001.nd2:25	15.536	12	-3.564	1-

## Sheet: V409I
03.02.22
30sec_15min_1um step 6um_
Soma x, y: x=19.68(47), y=79.96(191)							Branch point x,y: x=48.56(116), y=62.37(149)							Soma x, y: x=108.42(259), y=132.7(317)
	Label	Length	Time (min)	Rate (um/min)	Frames of growth, retraction, or pause			Label	Length	Time (min)	Rate (um/min)	Frames of growth, retraction, or pause			Label	Length	Time (min)	Rate (um/min)	Frames of growth, retraction, or pause
1	MAX_30sec_15min_1um step 6um_.nd2:1	19.802	0				1	MAX_30sec_15min_1um step 6um_.nd2:1	3.52	0				1	MAX_30sec_15min_1um step 6um_.nd2:1	17.738	0
2	MAX_30sec_15min_1um step 6um_.nd2:2	19.426	0.5	-0.752	0.5-		2	MAX_30sec_15min_1um step 6um_.nd2:2	3.569	0.5	0.098			2	MAX_30sec_15min_1um step 6um_.nd2:2	19.793	0.5	4.11	0.5+
3	MAX_30sec_15min_1um step 6um_.nd2:3	20.241	1	1.63			3	MAX_30sec_15min_1um step 6um_.nd2:3	3.821	1	0.504	1+		3	MAX_30sec_15min_1um step 6um_.nd2:3	19.382	1	-0.822	0.5-
4	MAX_30sec_15min_1um step 6um_.nd2:4	21.198	1.5	1.914			4	MAX_30sec_15min_1um step 6um_.nd2:4	3.596	1.5	-0.45			4	MAX_30sec_15min_1um step 6um_.nd2:4	19.498	1.5	0.232	0.5+
5	MAX_30sec_15min_1um step 6um_.nd2:5	22.003	2	1.61			5	MAX_30sec_15min_1um step 6um_.nd2:5	2.902	2	-1.388	1-		5	MAX_30sec_15min_1um step 6um_.nd2:5	16.941	2	-5.114	0.5-
6	MAX_30sec_15min_1um step 6um_.nd2:6	22.688	2.5	1.37	2+		6	MAX_30sec_15min_1um step 6um_.nd2:6	2.925	2.5	0.046			6	MAX_30sec_15min_1um step 6um_.nd2:6	17.579	2.5	1.276
7	MAX_30sec_15min_1um step 6um_.nd2:7	22.672	3	-0.032	0.5-		7	MAX_30sec_15min_1um step 6um_.nd2:7	3.475	3	1.1	1+		7	MAX_30sec_15min_1um step 6um_.nd2:7	17.68	3	0.202
8	MAX_30sec_15min_1um step 6um_.nd2:8	25.027	3.5	4.71	0.5+		8	MAX_30sec_15min_1um step 6um_.nd2:8	3.295	3.5	-0.36			8	MAX_30sec_15min_1um step 6um_.nd2:8	18.286	3.5	1.212	1.5+
9	MAX_30sec_15min_1um step 6um_.nd2:9	23.945	4	-2.164	0.5-		9	MAX_30sec_15min_1um step 6um_.nd2:9	3.129	4	-0.332	1-		9	MAX_30sec_15min_1um step 6um_.nd2:9	16.814	4	-2.944	0.5-
10	MAX_30sec_15min_1um step 6um_.nd2:10	23.945	4.5	0			10	MAX_30sec_15min_1um step 6um_.nd2:10	3.502	4.5	0.746			10	MAX_30sec_15min_1um step 6um_.nd2:10	19.096	4.5	4.564	0.5+
11	MAX_30sec_15min_1um step 6um_.nd2:11	23.945	5	0			11	MAX_30sec_15min_1um step 6um_.nd2:11	3.881	5	0.758	1+		11	MAX_30sec_15min_1um step 6um_.nd2:11	17.792	5	-2.608	0.5-
12	MAX_30sec_15min_1um step 6um_.nd2:12	23.945	5.5	0			12	MAX_30sec_15min_1um step 6um_.nd2:12	3.049	5.5	-1.664			12	MAX_30sec_15min_1um step 6um_.nd2:12	18.98	5.5	2.376
13	MAX_30sec_15min_1um step 6um_.nd2:13	23.945	6	0			13	MAX_30sec_15min_1um step 6um_.nd2:13	1.643	6	-2.812	1-		13	MAX_30sec_15min_1um step 6um_.nd2:13	20.02	6	2.08
14	MAX_30sec_15min_1um step 6um_.nd2:14	23.945	6.5	0			14	MAX_30sec_15min_1um step 6um_.nd2:14	1.976	6.5	0.666			14	MAX_30sec_15min_1um step 6um_.nd2:14	23.884	6.5	7.728
15	MAX_30sec_15min_1um step 6um_.nd2:15	23.945	7	0			15	MAX_30sec_15min_1um step 6um_.nd2:15	2.298	7	0.644	1+		15	MAX_30sec_15min_1um step 6um_.nd2:15	25.066	7	2.364	2+
16	MAX_30sec_15min_1um step 6um_.nd2:16	23.945	7.5	0	3.5/		16	MAX_30sec_15min_1um step 6um_.nd2:16	1.456	7.5	-1.684	0.5-		16	MAX_30sec_15min_1um step 6um_.nd2:16	22.909	7.5	-4.314
17	MAX_30sec_15min_1um step 6um_.nd2:17	25.613	8	3.336	0.5+		17	MAX_30sec_15min_1um step 6um_.nd2:17	2.566	8	2.22			17	MAX_30sec_15min_1um step 6um_.nd2:17	22.71	8	-0.398
18	MAX_30sec_15min_1um step 6um_.nd2:18	25.613	8.5	0			18	MAX_30sec_15min_1um step 6um_.nd2:18	2.812	8.5	0.492			18	MAX_30sec_15min_1um step 6um_.nd2:18	23.133	8.5	0.846
19	MAX_30sec_15min_1um step 6um_.nd2:19	25.613	9	0	1/		19	MAX_30sec_15min_1um step 6um_.nd2:19	4.059	9	2.494			19	MAX_30sec_15min_1um step 6um_.nd2:19	22.644	9	-0.978	2-
20	MAX_30sec_15min_1um step 6um_.nd2:20	23.362	9.5	-4.502	0.5-		20	MAX_30sec_15min_1um step 6um_.nd2:20	4.744	9.5	1.37	2+		20	MAX_30sec_15min_1um step 6um_.nd2:20	24.52	9.5	3.752	0.5+
21	MAX_30sec_15min_1um step 6um_.nd2:21	23.362	10	0			21	MAX_30sec_15min_1um step 6um_.nd2:21	2.797	10	-3.894	0.5-		21	MAX_30sec_15min_1um step 6um_.nd2:21	22.88	10	-3.28	0.5-
22	MAX_30sec_15min_1um step 6um_.nd2:22	23.362	10.5	0			22	MAX_30sec_15min_1um step 6um_.nd2:22	4.309	10.5	3.024	0.5+		22	MAX_30sec_15min_1um step 6um_.nd2:22	23.192	10.5	0.624
23	MAX_30sec_15min_1um step 6um_.nd2:23	23.362	11	0	1.5/		23	MAX_30sec_15min_1um step 6um_.nd2:23	3.794	11	-1.03	0.5-		23	MAX_30sec_15min_1um step 6um_.nd2:23	25.877	11	5.37	1+
24	MAX_30sec_15min_1um step 6um_.nd2:24	25.283	11.5	3.842	0.5+		24	MAX_30sec_15min_1um step 6um_.nd2:24	4.163	11.5	0.738			24	MAX_30sec_15min_1um step 6um_.nd2:24	25.417	11.5	-0.92
25	MAX_30sec_15min_1um step 6um_.nd2:25	25.283	12	0	0.5/		25	MAX_30sec_15min_1um step 6um_.nd2:25	4.798	12	1.27			25	MAX_30sec_15min_1um step 6um_.nd2:25	25.399	12	-0.036	1-
26	MAX_30sec_15min_1um step 6um_.nd2:26	27.168	12.5	3.77	0.5+		26	MAX_30sec_15min_1um step 6um_.nd2:26	6.693	12.5	3.79			26	MAX_30sec_15min_1um step 6um_.nd2:26	26.568	12.5	2.338
27	MAX_30sec_15min_1um step 6um_.nd2:27	27.168	13	0			27	MAX_30sec_15min_1um step 6um_.nd2:27	7.423	13	1.46	2+		27	MAX_30sec_15min_1um step 6um_.nd2:27	26.755	13	0.374
28	MAX_30sec_15min_1um step 6um_.nd2:28	27.168	13.5	0	1/		28	MAX_30sec_15min_1um step 6um_.nd2:28	6.8	13.5	-1.246	0.5-		28	MAX_30sec_15min_1um step 6um_.nd2:28	26.802	13.5	0.094	1.5+
29	MAX_30sec_15min_1um step 6um_.nd2:29	26.706	14	-0.924	0.5-		29	MAX_30sec_15min_1um step 6um_.nd2:29	8.086	14	2.572			29	MAX_30sec_15min_1um step 6um_.nd2:29	26.494	14	-0.616	0.5-
30	MAX_30sec_15min_1um step 6um_.nd2:30	26.706	14.5	0			30	MAX_30sec_15min_1um step 6um_.nd2:30	10.127	14.5	4.082			30	MAX_30sec_15min_1um step 6um_.nd2:30	26.513	14.5	0.038
31	MAX_30sec_15min_1um step 6um_.nd2:31	26.706	15	0	1/		31	MAX_30sec_15min_1um step 6um_.nd2:31	11.76	15	3.266	1.5+		31	MAX_30sec_15min_1um step 6um_.nd2:31	27.257	15	1.488	1+
30sec_15min_1um step 6um_002
Soma x, y: x=95.03(227), y=167.45(400)							Branch point x,y: x=82.05(196), y=156.98(375)							Soma x, y: x=156.98(375), y=132.28(316)							Branch point x, y: x=109.68(262), y=116.79(279)
	Label	Length	Time (min)	Rate (um/min)	Frames of growth, retraction, or pause			Label	Length	Time (min)	Rate (um/min)	Frames of growth, retraction, or pause			Label	Length	Time (min)	Rate (um/min)	Frames of growth, retraction, or pause			Label	Length	Time (min)	Rate (um/min)	Frames of growth, retraction, or pause
1	MAX_30sec_15min_1um step 6um_002.nd2:1	12.503	0				1	MAX_30sec_15min_1um step 6um_002.nd2:1	5.906	0				1	MAX_30sec_15min_1um step 6um_002.nd2:1	15.779	0				1	MAX_30sec_15min_1um step 6um_002.nd2:1	0	0
2	MAX_30sec_15min_1um step 6um_002.nd2:2	12.503	0.5	0			2	MAX_30sec_15min_1um step 6um_002.nd2:2	5.906	0.5	0	0.5/		2	MAX_30sec_15min_1um step 6um_002.nd2:2	14.511	0.5	-2.536	0.5-		2	MAX_30sec_15min_1um step 6um_002.nd2:2	0	0.5	0
3	MAX_30sec_15min_1um step 6um_002.nd2:3	12.503	1	0			3	MAX_30sec_15min_1um step 6um_002.nd2:3	7.245	1	2.678	0.5+		3	MAX_30sec_15min_1um step 6um_002.nd2:3	14.604	1	0.186	0.5+		3	MAX_30sec_15min_1um step 6um_002.nd2:3	0	1	0
4	MAX_30sec_15min_1um step 6um_002.nd2:4	12.503	1.5	0	1.5/		4	MAX_30sec_15min_1um step 6um_002.nd2:4	7.245	1.5	0	0.5/		4	MAX_30sec_15min_1um step 6um_002.nd2:4	14.604	1.5	0			4	MAX_30sec_15min_1um step 6um_002.nd2:4	0	1.5	0
5	MAX_30sec_15min_1um step 6um_002.nd2:5	14.44	2	3.874	0.5+		5	MAX_30sec_15min_1um step 6um_002.nd2:5	7.038	2	-0.414	0.5-		5	MAX_30sec_15min_1um step 6um_002.nd2:5	14.604	2	0	1/		5	MAX_30sec_15min_1um step 6um_002.nd2:5	0	2	0
6	MAX_30sec_15min_1um step 6um_002.nd2:6	12.789	2.5	-3.302	0.5-		6	MAX_30sec_15min_1um step 6um_002.nd2:6	8.739	2.5	3.402	0.5+		6	MAX_30sec_15min_1um step 6um_002.nd2:6	12.588	2.5	-4.032	0.5-		6	MAX_30sec_15min_1um step 6um_002.nd2:6	0	2.5	0
7	MAX_30sec_15min_1um step 6um_002.nd2:7	12.789	3	0	0.5/		7	MAX_30sec_15min_1um step 6um_002.nd2:7	8.739	3	0	0.5/		7	MAX_30sec_15min_1um step 6um_002.nd2:7	12.588	3	0			7	MAX_30sec_15min_1um step 6um_002.nd2:7	0	3	0
8	MAX_30sec_15min_1um step 6um_002.nd2:8	15.382	3.5	5.186	0.5+		8	MAX_30sec_15min_1um step 6um_002.nd2:8	10.426	3.5	3.374	0.5+		8	MAX_30sec_15min_1um step 6um_002.nd2:8	12.588	3.5	0	1/		8	MAX_30sec_15min_1um step 6um_002.nd2:8	0	3.5	0
9	MAX_30sec_15min_1um step 6um_002.nd2:9	14.711	4	-1.342	0.5-		9	MAX_30sec_15min_1um step 6um_002.nd2:9	10.426	4	0	0.5/		9	MAX_30sec_15min_1um step 6um_002.nd2:9	11.088	4	-3			9	MAX_30sec_15min_1um step 6um_002.nd2:9	0	4	0
10	MAX_30sec_15min_1um step 6um_002.nd2:10	14.711	4.5	0	0.5/		10	MAX_30sec_15min_1um step 6um_002.nd2:10	8.033	4.5	-4.786	0.5-		10	MAX_30sec_15min_1um step 6um_002.nd2:10	10.076	4.5	-2.024	1-		10	MAX_30sec_15min_1um step 6um_002.nd2:10	0	4.5	0
11	MAX_30sec_15min_1um step 6um_002.nd2:11	17.265	5	5.108	0.5+		11	MAX_30sec_15min_1um step 6um_002.nd2:11	8.599	5	1.132			11	MAX_30sec_15min_1um step 6um_002.nd2:11	10.076	5	0	0.5/		11	MAX_30sec_15min_1um step 6um_002.nd2:11	0	5	0
12	MAX_30sec_15min_1um step 6um_002.nd2:12	17.265	5.5	0	0.5/		12	MAX_30sec_15min_1um step 6um_002.nd2:12	10.851	5.5	4.504	1+		12	MAX_30sec_15min_1um step 6um_002.nd2:12	9.399	5.5	-1.354	0.5-		12	MAX_30sec_15min_1um step 6um_002.nd2:12	0	5.5	0
13	MAX_30sec_15min_1um step 6um_002.nd2:13	18.431	6	2.332	0.5+		13	MAX_30sec_15min_1um step 6um_002.nd2:13	8.24	6	-5.222			13	MAX_30sec_15min_1um step 6um_002.nd2:13	9.399	6	0			13	MAX_30sec_15min_1um step 6um_002.nd2:13	0	6	0
14	MAX_30sec_15min_1um step 6um_002.nd2:14	18.431	6.5	0	0.5/		14	MAX_30sec_15min_1um step 6um_002.nd2:14	4.817	6.5	-6.846	1-		14	MAX_30sec_15min_1um step 6um_002.nd2:14	9.399	6.5	0			14	MAX_30sec_15min_1um step 6um_002.nd2:14	0	6.5	0
15	MAX_30sec_15min_1um step 6um_002.nd2:15	19.222	7	1.582	0.5+		15	MAX_30sec_15min_1um step 6um_002.nd2:15	5.958	7	2.282			15	MAX_30sec_15min_1um step 6um_002.nd2:15	9.399	7	0			15	MAX_30sec_15min_1um step 6um_002.nd2:15	0	7	0
16	MAX_30sec_15min_1um step 6um_002.nd2:16	19.222	7.5	0			16	MAX_30sec_15min_1um step 6um_002.nd2:16	7.12	7.5	2.324			16	MAX_30sec_15min_1um step 6um_002.nd2:16	9.399	7.5	0	2/		16	MAX_30sec_15min_1um step 6um_002.nd2:16	0	7.5	0
17	MAX_30sec_15min_1um step 6um_002.nd2:17	19.222	8	0			17	MAX_30sec_15min_1um step 6um_002.nd2:17	8.961	8	3.682			17	MAX_30sec_15min_1um step 6um_002.nd2:17	9.23	8	-0.338	0.5-		17	MAX_30sec_15min_1um step 6um_002.nd2:17	0	8	0	8/
18	MAX_30sec_15min_1um step 6um_002.nd2:18	19.222	8.5	0			18	MAX_30sec_15min_1um step 6um_002.nd2:18	9.582	8.5	1.242	2+		18	MAX_30sec_15min_1um step 6um_002.nd2:18	9.23	8.5	0			18	MAX_30sec_15min_1um step 6um_002.nd2:18	0.78	8.5	1.56
19	MAX_30sec_15min_1um step 6um_002.nd2:19	19.222	9	0	2/		19	MAX_30sec_15min_1um step 6um_002.nd2:19	7.189	9	-4.786			19	MAX_30sec_15min_1um step 6um_002.nd2:19	9.23	9	0			19	MAX_30sec_15min_1um step 6um_002.nd2:19	1.453	9	1.346
20	MAX_30sec_15min_1um step 6um_002.nd2:20	20.363	9.5	2.282	0.5+		20	MAX_30sec_15min_1um step 6um_002.nd2:20	5.412	9.5	-3.554	1-		20	MAX_30sec_15min_1um step 6um_002.nd2:20	9.23	9.5	0			20	MAX_30sec_15min_1um step 6um_002.nd2:20	1.938	9.5	0.97	1.5+
21	MAX_30sec_15min_1um step 6um_002.nd2:21	20.363	10	0			21	MAX_30sec_15min_1um step 6um_002.nd2:21	6.933	10	3.042			21	MAX_30sec_15min_1um step 6um_002.nd2:21	9.23	10	0			21	MAX_30sec_15min_1um step 6um_002.nd2:21	1.938	10	0	0.5/
22	MAX_30sec_15min_1um step 6um_002.nd2:22	20.363	10.5	0	1/		22	MAX_30sec_15min_1um step 6um_002.nd2:22	8.143	10.5	2.42			22	MAX_30sec_15min_1um step 6um_002.nd2:22	9.23	10.5	0	2.5/		22	MAX_30sec_15min_1um step 6um_002.nd2:22	2.613	10.5	1.35	0.5+
23	MAX_30sec_15min_1um step 6um_002.nd2:23	22.532	11	4.338	0.5+		23	MAX_30sec_15min_1um step 6um_002.nd2:23	10.152	11	4.018	1.5+		23	MAX_30sec_15min_1um step 6um_002.nd2:23	10.769	11	3.078			23	MAX_30sec_15min_1um step 6um_002.nd2:23	0.651	11	-3.924	0.5-
24	MAX_30sec_15min_1um step 6um_002.nd2:24	22.532	11.5	0	0.5/		24	MAX_30sec_15min_1um step 6um_002.nd2:24	10.152	11.5	0			24	MAX_30sec_15min_1um step 6um_002.nd2:24	12.18	11.5	2.822	1+		24	MAX_30sec_15min_1um step 6um_002.nd2:24	1.634	11.5	1.966
25	MAX_30sec_15min_1um step 6um_002.nd2:25	25.187	12	5.31			25	MAX_30sec_15min_1um step 6um_002.nd2:25	10.152	12	0	1/		25	MAX_30sec_15min_1um step 6um_002.nd2:25	12.18	12	0	0.5/		25	MAX_30sec_15min_1um step 6um_002.nd2:25	3.286	12	3.304
26	MAX_30sec_15min_1um step 6um_002.nd2:26	28.205	12.5	6.036	1+		26	MAX_30sec_15min_1um step 6um_002.nd2:26	8.084	12.5	-4.136			26	MAX_30sec_15min_1um step 6um_002.nd2:26	10.321	12.5	-3.718	0.5-		26	MAX_30sec_15min_1um step 6um_002.nd2:26	4.345	12.5	2.118	1.5+
27	MAX_30sec_15min_1um step 6um_002.nd2:27	28.205	13	0	0.5/		27	MAX_30sec_15min_1um step 6um_002.nd2:27	5.381	13	-5.406	1-		27	MAX_30sec_15min_1um step 6um_002.nd2:27	10.321	13	0	0.5/		27	MAX_30sec_15min_1um step 6um_002.nd2:27	3.885	13	-0.92	0.5-
28	MAX_30sec_15min_1um step 6um_002.nd2:28	27.393	13.5	-1.624	0.5-		28	MAX_30sec_15min_1um step 6um_002.nd2:28	5.381	13.5	0			28	MAX_30sec_15min_1um step 6um_002.nd2:28	13.194	13.5	5.746			28	MAX_30sec_15min_1um step 6um_002.nd2:28	3.885	13.5	0
29	MAX_30sec_15min_1um step 6um_002.nd2:29	27.393	14	0			29	MAX_30sec_15min_1um step 6um_002.nd2:29	5.381	14	0			29	MAX_30sec_15min_1um step 6um_002.nd2:29	14.19	14	1.992	1+		29	MAX_30sec_15min_1um step 6um_002.nd2:29	3.885	14	0
30	MAX_30sec_15min_1um step 6um_002.nd2:30	27.393	14.5	0			30	MAX_30sec_15min_1um step 6um_002.nd2:30	5.381	14.5	0			30	MAX_30sec_15min_1um step 6um_002.nd2:30	11.243	14.5	-5.894			30	MAX_30sec_15min_1um step 6um_002.nd2:30	3.885	14.5	0	1.5/
31	MAX_30sec_15min_1um step 6um_002.nd2:31	27.393	15	0	1.5/		31	MAX_30sec_15min_1um step 6um_002.nd2:31	5.381	15	0	2/		31	MAX_30sec_15min_1um step 6um_002.nd2:31	10.868	15	-0.75	1-		31	MAX_30sec_15min_1um step 6um_002.nd2:31	4.903	15	2.036	0.5+

## Sheet: V409A
03.02.22
30sec_15min_1um step 6um_001
Branch point x, y: x=8.37(20), y=163.26(390)							Branch point x, y: x=66.14(158), y=144.84(346)							Soma x, y: x=154.05(368), y=145.68(348)							Soma x, y: x=69.07(165), y=140.24(335)
	Label	Length	Time (min)	Rate (um/min)	Frames of growth, retraction, or pause			Label	Length	Time (min)	Rate (um/min)	Frames of growth, retraction, or pause			Label	Length	Time (min)	Rate (um/min)	Frames of growth, retraction, or pause			Label	Length	Time (min)	Rate (um/min)	Frames of growth, retraction, or pause
1	MAX_30sec_15min_1um step 6um_001.nd2:1	7.773	0				1	MAX_30sec_15min_1um step 6um_001.nd2:1	5.933	0				1	MAX_30sec_15min_1um step 6um_001.nd2:1	9.171	0				1	MAX_30sec_15min_1um step 6um_001.nd2:1	15.975	0
2	MAX_30sec_15min_1um step 6um_001.nd2:2	8.708	0.5	1.87			2	MAX_30sec_15min_1um step 6um_001.nd2:2	5.933	0.5	0	0.5/		2	MAX_30sec_15min_1um step 6um_001.nd2:2	9.171	0.5	0	0.5/		2	MAX_30sec_15min_1um step 6um_001.nd2:2	15.975	0.5	0
3	MAX_30sec_15min_1um step 6um_001.nd2:3	9.255	1	1.094			3	MAX_30sec_15min_1um step 6um_001.nd2:3	9.278	1	6.69			3	MAX_30sec_15min_1um step 6um_001.nd2:3	10.965	1	3.588			3	MAX_30sec_15min_1um step 6um_001.nd2:3	15.975	1	0
4	MAX_30sec_15min_1um step 6um_001.nd2:4	12.551	1.5	6.592			4	MAX_30sec_15min_1um step 6um_001.nd2:4	10.552	1.5	2.548	1+		4	MAX_30sec_15min_1um step 6um_001.nd2:4	13.69	1.5	5.45	1+		4	MAX_30sec_15min_1um step 6um_001.nd2:4	15.975	1.5	0
5	MAX_30sec_15min_1um step 6um_001.nd2:5	13.69	2	2.278	2+		5	MAX_30sec_15min_1um step 6um_001.nd2:5	8.734	2	-3.636	0.5-		5	MAX_30sec_15min_1um step 6um_001.nd2:5	13.69	2	0			5	MAX_30sec_15min_1um step 6um_001.nd2:5	15.975	2	0
6	MAX_30sec_15min_1um step 6um_001.nd2:6	13.379	2.5	-0.622	0.5-		6	MAX_30sec_15min_1um step 6um_001.nd2:6	8.734	2.5	0			6	MAX_30sec_15min_1um step 6um_001.nd2:6	13.69	2.5	0			6	MAX_30sec_15min_1um step 6um_001.nd2:6	15.975	2.5	0
7	MAX_30sec_15min_1um step 6um_001.nd2:7	14.65	3	2.542			7	MAX_30sec_15min_1um step 6um_001.nd2:7	8.734	3	0			7	MAX_30sec_15min_1um step 6um_001.nd2:7	13.69	3	0	1.5/		7	MAX_30sec_15min_1um step 6um_001.nd2:7	15.975	3	0
8	MAX_30sec_15min_1um step 6um_001.nd2:8	15.615	3.5	1.93			8	MAX_30sec_15min_1um step 6um_001.nd2:8	8.734	3.5	0			8	MAX_30sec_15min_1um step 6um_001.nd2:8	15.81	3.5	4.24	0.5+		8	MAX_30sec_15min_1um step 6um_001.nd2:8	15.975	3.5	0	3.5/
9	MAX_30sec_15min_1um step 6um_001.nd2:9	15.914	4	0.598			9	MAX_30sec_15min_1um step 6um_001.nd2:9	8.734	4	0			9	MAX_30sec_15min_1um step 6um_001.nd2:9	15.698	4	-0.224	0.5-		9	MAX_30sec_15min_1um step 6um_001.nd2:9	16.874	4	1.798	0.5+
10	MAX_30sec_15min_1um step 6um_001.nd2:10	18.524	4.5	5.22			10	MAX_30sec_15min_1um step 6um_001.nd2:10	8.734	4.5	0			10	MAX_30sec_15min_1um step 6um_001.nd2:10	15.698	4.5	0			10	MAX_30sec_15min_1um step 6um_001.nd2:10	16.874	4.5	0	0.5/
11	MAX_30sec_15min_1um step 6um_001.nd2:11	18.906	5	0.764	2.5+		11	MAX_30sec_15min_1um step 6um_001.nd2:11	8.734	5	0			11	MAX_30sec_15min_1um step 6um_001.nd2:11	15.698	5	0	1/		11	MAX_30sec_15min_1um step 6um_001.nd2:11	20.564	5	7.38	0.5+
12	MAX_30sec_15min_1um step 6um_001.nd2:12	14.278	5.5	-9.256	0.5-		12	MAX_30sec_15min_1um step 6um_001.nd2:12	8.734	5.5	0			12	MAX_30sec_15min_1um step 6um_001.nd2:12	15.917	5.5	0.438			12	MAX_30sec_15min_1um step 6um_001.nd2:12	20.564	5.5	0	0.5/
13	MAX_30sec_15min_1um step 6um_001.nd2:13	18.212	6	7.868	0.5+		13	MAX_30sec_15min_1um step 6um_001.nd2:13	8.734	6	0			13	MAX_30sec_15min_1um step 6um_001.nd2:13	17.463	6	3.092	1+		13	MAX_30sec_15min_1um step 6um_001.nd2:13	22.099	6	3.07	0.5+
14	MAX_30sec_15min_1um step 6um_001.nd2:14	17.245	6.5	-1.934			14	MAX_30sec_15min_1um step 6um_001.nd2:14	8.734	6.5	0	4.5/		14	MAX_30sec_15min_1um step 6um_001.nd2:14	17.463	6.5	0			14	MAX_30sec_15min_1um step 6um_001.nd2:14	22.099	6.5	0
15	MAX_30sec_15min_1um step 6um_001.nd2:15	15.357	7	-3.776			15	MAX_30sec_15min_1um step 6um_001.nd2:15	9.977	7	2.486	0.5+		15	MAX_30sec_15min_1um step 6um_001.nd2:15	17.463	7	0			15	MAX_30sec_15min_1um step 6um_001.nd2:15	22.099	7	0
16	MAX_30sec_15min_1um step 6um_001.nd2:16	10.527	7.5	-9.66	1.5-		16	MAX_30sec_15min_1um step 6um_001.nd2:16	8.29	7.5	-3.374	0.5-		16	MAX_30sec_15min_1um step 6um_001.nd2:16	17.463	7.5	0			16	MAX_30sec_15min_1um step 6um_001.nd2:16	22.099	7.5	0
17	MAX_30sec_15min_1um step 6um_001.nd2:17	13.67	8	6.286	0.5+		17	MAX_30sec_15min_1um step 6um_001.nd2:17	9.495	8	2.41			17	MAX_30sec_15min_1um step 6um_001.nd2:17	17.463	8	0			17	MAX_30sec_15min_1um step 6um_001.nd2:17	22.099	8	0	2/
18	MAX_30sec_15min_1um step 6um_001.nd2:18	13.388	8.5	-0.564			18	MAX_30sec_15min_1um step 6um_001.nd2:18	10.546	8.5	2.102	1+		18	MAX_30sec_15min_1um step 6um_001.nd2:18	17.463	8.5	0	2.5/		18	MAX_30sec_15min_1um step 6um_001.nd2:18	22.8	8.5	1.402	0.5+
19	MAX_30sec_15min_1um step 6um_001.nd2:19	13.349	9	-0.078	1-		19	MAX_30sec_15min_1um step 6um_001.nd2:19	10.394	9	-0.304	0.5-		19	MAX_30sec_15min_1um step 6um_001.nd2:19	18.627	9	2.328	0.5+		19	MAX_30sec_15min_1um step 6um_001.nd2:19	22.8	9	0	0.5/
20	MAX_30sec_15min_1um step 6um_001.nd2:20	14.536	9.5	2.374	0.5+		20	MAX_30sec_15min_1um step 6um_001.nd2:20	11.433	9.5	2.078	0.5+		20	MAX_30sec_15min_1um step 6um_001.nd2:20	18.627	9.5	0			20	MAX_30sec_15min_1um step 6um_001.nd2:20	23.099	9.5	0.598	0.5+
21	MAX_30sec_15min_1um step 6um_001.nd2:21	13.595	10	-1.882			21	MAX_30sec_15min_1um step 6um_001.nd2:21	11.433	10	0	0.5/		21	MAX_30sec_15min_1um step 6um_001.nd2:21	18.627	10	0	1/		21	MAX_30sec_15min_1um step 6um_001.nd2:21	22.53	10	-1.138	0.5-
22	MAX_30sec_15min_1um step 6um_001.nd2:22	10.72	10.5	-5.75	1-		22	MAX_30sec_15min_1um step 6um_001.nd2:22	10.656	10.5	-1.554			22	MAX_30sec_15min_1um step 6um_001.nd2:22	18.549	10.5	-0.156	0.5-		22	MAX_30sec_15min_1um step 6um_001.nd2:22	22.53	10.5	0	0.5/
23	MAX_30sec_15min_1um step 6um_001.nd2:23	11.272	11	1.104	0.5+		23	MAX_30sec_15min_1um step 6um_001.nd2:23	9.98	11	-1.352	1-		23	MAX_30sec_15min_1um step 6um_001.nd2:23	19.384	11	1.67	0.5+		23	MAX_30sec_15min_1um step 6um_001.nd2:23	23.207	11	1.354	0.5+
24	MAX_30sec_15min_1um step 6um_001.nd2:24	11.272	11.5	0			24	MAX_30sec_15min_1um step 6um_001.nd2:24	11.58	11.5	3.2			24	MAX_30sec_15min_1um step 6um_001.nd2:24	19.384	11.5	0			24	MAX_30sec_15min_1um step 6um_001.nd2:24	23.207	11.5	0
25	MAX_30sec_15min_1um step 6um_001.nd2:25	11.272	12	0			25	MAX_30sec_15min_1um step 6um_001.nd2:25	12.15	12	1.14			25	MAX_30sec_15min_1um step 6um_001.nd2:25	19.384	12	0	1/		25	MAX_30sec_15min_1um step 6um_001.nd2:25	23.207	12	0	1/
26	MAX_30sec_15min_1um step 6um_001.nd2:26	11.272	12.5	0			26	MAX_30sec_15min_1um step 6um_001.nd2:26	12.44	12.5	0.58	1.5+		26	MAX_30sec_15min_1um step 6um_001.nd2:26	20.78	12.5	2.792			26	MAX_30sec_15min_1um step 6um_001.nd2:26	24.55	12.5	2.686
27	MAX_30sec_15min_1um step 6um_001.nd2:27	11.272	13	0	2/		27	MAX_30sec_15min_1um step 6um_001.nd2:27	12.44	13	0	0.5/		27	MAX_30sec_15min_1um step 6um_001.nd2:27	21.316	13	1.072	1+		27	MAX_30sec_15min_1um step 6um_001.nd2:27	26.953	13	4.806	1+
28	MAX_30sec_15min_1um step 6um_001.nd2:28	12.336	13.5	2.128	0.5+		28	MAX_30sec_15min_1um step 6um_001.nd2:28	10.262	13.5	-4.356	0.5-		28	MAX_30sec_15min_1um step 6um_001.nd2:28	18.802	13.5	-5.028	0.5-		28	MAX_30sec_15min_1um step 6um_001.nd2:28	26.953	13.5	0
29	MAX_30sec_15min_1um step 6um_001.nd2:29	12.336	14	0	0.5/		29	MAX_30sec_15min_1um step 6um_001.nd2:29	12.318	14	4.112			29	MAX_30sec_15min_1um step 6um_001.nd2:29	19.441	14	1.278			29	MAX_30sec_15min_1um step 6um_001.nd2:29	26.953	14	0
30	MAX_30sec_15min_1um step 6um_001.nd2:30	12.588	14.5	0.504	0.5+		30	MAX_30sec_15min_1um step 6um_001.nd2:30	13.042	14.5	1.448	1+		30	MAX_30sec_15min_1um step 6um_001.nd2:30	20.59	14.5	2.298	1+		30	MAX_30sec_15min_1um step 6um_001.nd2:30	26.953	14.5	0
31	MAX_30sec_15min_1um step 6um_001.nd2:31	11.361	15	-2.454	0.5-		31	MAX_30sec_15min_1um step 6um_001.nd2:31	11.256	15	-3.572	0.5-		31	MAX_30sec_15min_1um step 6um_001.nd2:31	20.558	15	-0.064	0.5-		31	MAX_30sec_15min_1um step 6um_001.nd2:31	26.953	15	0	2/

## Sheet: V409I (2)
03.09.22
V409I_30sec_15min_1um step 6um_003
Branch point x, y: x=115.54(276), y=46.05(110)							Branch point x, y: x=117.63(281), y=48.98(117)							Branch point x, y: x=63.63(152), y=128.52(307)
	Label	Length	Time (min)	Rate (um/min)	Frames of growth, retraction, or pause			Label	Length	Time (min)	Rate (um/min)	Frames of growth, retraction, or pause			Label	Length	Time (min)	Rate (um/min)	Frames of growth, retraction, or pause
1	MAX_V409I_30sec_15min_1um step 6um_003.nd2:1	18.534	0				1	MAX_V409I_30sec_15min_1um step 6um_003.nd2:1	8.703	0				1	MAX_V409I_30sec_15min_1um step 6um_003.nd2:1	24.191	0
2	MAX_V409I_30sec_15min_1um step 6um_003.nd2:2	20.443	0.5	3.818	0.5+		2	MAX_V409I_30sec_15min_1um step 6um_003.nd2:2	11.218	0.5	5.03	0.5+		2	MAX_V409I_30sec_15min_1um step 6um_003.nd2:2	24.93	0.5	1.478	0.5+
3	MAX_V409I_30sec_15min_1um step 6um_003.nd2:3	19.938	1	-1.01	0.5-		3	MAX_V409I_30sec_15min_1um step 6um_003.nd2:3	8.783	1	-4.87	0.5-		3	MAX_V409I_30sec_15min_1um step 6um_003.nd2:3	24.93	1	0
4	MAX_V409I_30sec_15min_1um step 6um_003.nd2:4	20.9	1.5	1.924			4	MAX_V409I_30sec_15min_1um step 6um_003.nd2:4	8.783	1.5	0	0.5/		4	MAX_V409I_30sec_15min_1um step 6um_003.nd2:4	24.93	1.5	0	1/
5	MAX_V409I_30sec_15min_1um step 6um_003.nd2:5	21.761	2	1.722			5	MAX_V409I_30sec_15min_1um step 6um_003.nd2:5	6.405	2	-4.756			5	MAX_V409I_30sec_15min_1um step 6um_003.nd2:5	25.636	2	1.412	0.5+
6	MAX_V409I_30sec_15min_1um step 6um_003.nd2:6	24.368	2.5	5.214			6	MAX_V409I_30sec_15min_1um step 6um_003.nd2:6	4.663	2.5	-3.484	1-		6	MAX_V409I_30sec_15min_1um step 6um_003.nd2:6	25.636	2.5	0	0.5/
7	MAX_V409I_30sec_15min_1um step 6um_003.nd2:7	25.132	3	1.528			7	MAX_V409I_30sec_15min_1um step 6um_003.nd2:7	4.663	3	0	0.5/		7	MAX_V409I_30sec_15min_1um step 6um_003.nd2:7	26.914	3	2.556
8	MAX_V409I_30sec_15min_1um step 6um_003.nd2:8	27.265	3.5	4.266			8	MAX_V409I_30sec_15min_1um step 6um_003.nd2:8	3.901	3.5	-1.524	0.5-		8	MAX_V409I_30sec_15min_1um step 6um_003.nd2:8	26.952	3.5	0.076
9	MAX_V409I_30sec_15min_1um step 6um_003.nd2:9	28.859	4	3.188			9	MAX_V409I_30sec_15min_1um step 6um_003.nd2:9	5.806	4	3.81	0.5+		9	MAX_V409I_30sec_15min_1um step 6um_003.nd2:9	28.457	4	3.01	1.5+
10	MAX_V409I_30sec_15min_1um step 6um_003.nd2:10	30.398	4.5	3.078			10	MAX_V409I_30sec_15min_1um step 6um_003.nd2:10	5.806	4.5	0	0.5/		10	MAX_V409I_30sec_15min_1um step 6um_003.nd2:10	28.457	4.5	0
11	MAX_V409I_30sec_15min_1um step 6um_003.nd2:11	30.743	5	0.69	4+		11	MAX_V409I_30sec_15min_1um step 6um_003.nd2:11	4.334	5	-2.944	0.5-		11	MAX_V409I_30sec_15min_1um step 6um_003.nd2:11	28.457	5	0
12	MAX_V409I_30sec_15min_1um step 6um_003.nd2:12	30.574	5.5	-0.338	0.5-		12	MAX_V409I_30sec_15min_1um step 6um_003.nd2:12	6.128	5.5	3.588	0.5+		12	MAX_V409I_30sec_15min_1um step 6um_003.nd2:12	28.457	5.5	0	1.5/
13	MAX_V409I_30sec_15min_1um step 6um_003.nd2:13	32.184	6	3.22			13	MAX_V409I_30sec_15min_1um step 6um_003.nd2:13	6.128	6	0			13	MAX_V409I_30sec_15min_1um step 6um_003.nd2:13	29.397	6	1.88	0.5+
14	MAX_V409I_30sec_15min_1um step 6um_003.nd2:14	34.543	6.5	4.718	1+		14	MAX_V409I_30sec_15min_1um step 6um_003.nd2:14	6.128	6.5	0			14	MAX_V409I_30sec_15min_1um step 6um_003.nd2:14	29.397	6.5	0	0.5/
15	MAX_V409I_30sec_15min_1um step 6um_003.nd2:15	34.543	7	0	0.5/		15	MAX_V409I_30sec_15min_1um step 6um_003.nd2:15	6.128	7	0			15	MAX_V409I_30sec_15min_1um step 6um_003.nd2:15	28.733	7	-1.328	0.5-
16	MAX_V409I_30sec_15min_1um step 6um_003.nd2:16	32.395	7.5	-4.296	0.5-		16	MAX_V409I_30sec_15min_1um step 6um_003.nd2:16	6.128	7.5	0			16	MAX_V409I_30sec_15min_1um step 6um_003.nd2:16	28.733	7.5	0	0.5/
17	MAX_V409I_30sec_15min_1um step 6um_003.nd2:17	32.395	8	0			17	MAX_V409I_30sec_15min_1um step 6um_003.nd2:17	6.128	8	0			17	MAX_V409I_30sec_15min_1um step 6um_003.nd2:17	29.345	8	1.224
18	MAX_V409I_30sec_15min_1um step 6um_003.nd2:18	32.395	8.5	0	1/		18	MAX_V409I_30sec_15min_1um step 6um_003.nd2:18	6.128	8.5	0			18	MAX_V409I_30sec_15min_1um step 6um_003.nd2:18	30.984	8.5	3.278
19	MAX_V409I_30sec_15min_1um step 6um_003.nd2:19	34.474	9	4.158	0.5+		19	MAX_V409I_30sec_15min_1um step 6um_003.nd2:19	6.128	9	0			19	MAX_V409I_30sec_15min_1um step 6um_003.nd2:19	31.858	9	1.748	1.5+
20	MAX_V409I_30sec_15min_1um step 6um_003.nd2:20	34.474	9.5	0	0.5/		20	MAX_V409I_30sec_15min_1um step 6um_003.nd2:20	6.128	9.5	0			20	MAX_V409I_30sec_15min_1um step 6um_003.nd2:20	31.668	9.5	-0.38	0.5-
21	MAX_V409I_30sec_15min_1um step 6um_003.nd2:21	35.951	10	2.954	0.5+		21	MAX_V409I_30sec_15min_1um step 6um_003.nd2:21	6.128	10	0			21	MAX_V409I_30sec_15min_1um step 6um_003.nd2:21	31.668	10	0
22	MAX_V409I_30sec_15min_1um step 6um_003.nd2:22	35.951	10.5	0			22	MAX_V409I_30sec_15min_1um step 6um_003.nd2:22	6.128	10.5	0			22	MAX_V409I_30sec_15min_1um step 6um_003.nd2:22	31.668	10.5	0
23	MAX_V409I_30sec_15min_1um step 6um_003.nd2:23	35.951	11	0			23	MAX_V409I_30sec_15min_1um step 6um_003.nd2:23	6.128	11	0			23	MAX_V409I_30sec_15min_1um step 6um_003.nd2:23	31.668	11	0
24	MAX_V409I_30sec_15min_1um step 6um_003.nd2:24	35.951	11.5	0			24	MAX_V409I_30sec_15min_1um step 6um_003.nd2:24	6.128	11.5	0			24	MAX_V409I_30sec_15min_1um step 6um_003.nd2:24	31.668	11.5	0	2/
25	MAX_V409I_30sec_15min_1um step 6um_003.nd2:25	35.951	12	0			25	MAX_V409I_30sec_15min_1um step 6um_003.nd2:25	6.128	12	0	6.5/		25	MAX_V409I_30sec_15min_1um step 6um_003.nd2:25	33.237	12	3.138
26	MAX_V409I_30sec_15min_1um step 6um_003.nd2:26	35.951	12.5	0			26	MAX_V409I_30sec_15min_1um step 6um_003.nd2:26	3.574	12.5	-5.108	0.5-		26	MAX_V409I_30sec_15min_1um step 6um_003.nd2:26	34.297	12.5	2.12	1+
27	MAX_V409I_30sec_15min_1um step 6um_003.nd2:27	35.951	13	0			27	MAX_V409I_30sec_15min_1um step 6um_003.nd2:27	3.574	13	0			27	MAX_V409I_30sec_15min_1um step 6um_003.nd2:27	34.297	13	0
28	MAX_V409I_30sec_15min_1um step 6um_003.nd2:28	35.951	13.5	0			28	MAX_V409I_30sec_15min_1um step 6um_003.nd2:28	3.574	13.5	0	1/		28	MAX_V409I_30sec_15min_1um step 6um_003.nd2:28	34.297	13.5	0	1+
29	MAX_V409I_30sec_15min_1um step 6um_003.nd2:29	35.951	14	0			29	MAX_V409I_30sec_15min_1um step 6um_003.nd2:29	3.067	14	-1.014	0.5-		29	MAX_V409I_30sec_15min_1um step 6um_003.nd2:29	32.258	14	-4.078
30	MAX_V409I_30sec_15min_1um step 6um_003.nd2:30	35.951	14.5	0			30	MAX_V409I_30sec_15min_1um step 6um_003.nd2:30	3.067	14.5	0			30	MAX_V409I_30sec_15min_1um step 6um_003.nd2:30	30.711	14.5	-3.094
31	MAX_V409I_30sec_15min_1um step 6um_003.nd2:31	35.951	15	0	5/		31	MAX_V409I_30sec_15min_1um step 6um_003.nd2:31	3.067	15	0	1/		31	MAX_V409I_30sec_15min_1um step 6um_003.nd2:31	30.217	15	-0.988	1.5-
V409I_30sec_15min_1um step 6um_004
Branch point x, y: x=115.54(276), y=46.05(110)
	Label	Length	Time (min)	Rate (um/min)	Frames of growth, retraction, or pause
1	MAX_V409I_30sec_15min_1um step 6um_004.nd2:1	23.802	0
2	MAX_V409I_30sec_15min_1um step 6um_004.nd2:2	23.802	0.5	0
3	MAX_V409I_30sec_15min_1um step 6um_004.nd2:3	23.802	1	0	1/
4	MAX_V409I_30sec_15min_1um step 6um_004.nd2:4	21.809	1.5	-3.986	0.5-
5	MAX_V409I_30sec_15min_1um step 6um_004.nd2:5	22.512	2	1.406	0.5+
6	MAX_V409I_30sec_15min_1um step 6um_004.nd2:6	22.38	2.5	-0.264	0.5-
7	MAX_V409I_30sec_15min_1um step 6um_004.nd2:7	23.606	3	2.452	0.5+
8	MAX_V409I_30sec_15min_1um step 6um_004.nd2:8	21.588	3.5	-4.036	0.5-
9	MAX_V409I_30sec_15min_1um step 6um_004.nd2:9	23.788	4	4.4
10	MAX_V409I_30sec_15min_1um step 6um_004.nd2:10	25.114	4.5	2.652	1+
11	MAX_V409I_30sec_15min_1um step 6um_004.nd2:11	24.226	5	-1.776	0.5-
12	MAX_V409I_30sec_15min_1um step 6um_004.nd2:12	24.78	5.5	1.108
13	MAX_V409I_30sec_15min_1um step 6um_004.nd2:13	25.17	6	0.78
14	MAX_V409I_30sec_15min_1um step 6um_004.nd2:14	26.539	6.5	2.738	1.5+
15	MAX_V409I_30sec_15min_1um step 6um_004.nd2:15	26.539	7	0	0.5/
16	MAX_V409I_30sec_15min_1um step 6um_004.nd2:16	25.944	7.5	-1.19	0.5-
17	MAX_V409I_30sec_15min_1um step 6um_004.nd2:17	27.547	8	3.206	0.5+
18	MAX_V409I_30sec_15min_1um step 6um_004.nd2:18	26.667	8.5	-1.76
19	MAX_V409I_30sec_15min_1um step 6um_004.nd2:19	25.269	9	-2.796	1-
20	MAX_V409I_30sec_15min_1um step 6um_004.nd2:20	26.002	9.5	1.466
21	MAX_V409I_30sec_15min_1um step 6um_004.nd2:21	27.064	10	2.124
22	MAX_V409I_30sec_15min_1um step 6um_004.nd2:22	27.319	10.5	0.51	1.5+
23	MAX_V409I_30sec_15min_1um step 6um_004.nd2:23	27.319	11	0	0.5/
24	MAX_V409I_30sec_15min_1um step 6um_004.nd2:24	26.282	11.5	-2.074	0.5-
25	MAX_V409I_30sec_15min_1um step 6um_004.nd2:25	27.01	12	1.456
26	MAX_V409I_30sec_15min_1um step 6um_004.nd2:26	28.391	12.5	2.762	1+
27	MAX_V409I_30sec_15min_1um step 6um_004.nd2:27	26.265	13	-4.252
28	MAX_V409I_30sec_15min_1um step 6um_004.nd2:28	25.621	13.5	-1.288	1-
29	MAX_V409I_30sec_15min_1um step 6um_004.nd2:29	25.621	14	0
30	MAX_V409I_30sec_15min_1um step 6um_004.nd2:30	25.621	14.5	0	1/
31	MAX_V409I_30sec_15min_1um step 6um_004.nd2:31	24.682	15	-1.878	0.5-

## Sheet: V409A (2)
03.09.22
V409A_30sec_15min_1um step 6um_
Branch point x, y: x=34.33(82), y=49.82(119)							Branch point x, y: x=92.51(221), y=50.65(121)							Branch point x, y: x=109.68(262), y=40.61(97)							Branch point x, y: x=142.33(340), y=167.03(399)							Branch point x, y: x=166.61(398), y=138.56(331)							Branch point x, y: x=156.14(373), y=178.75(427)
	Label	Length	Time (min)	Rate (um/min)	Frames of growth, retraction, or pause			Label	Length	Time (min)	Rate (um/min)	Frames of growth, retraction, or pause			Label	Length	Time (min)	Rate (um/min)	Frames of growth, retraction, or pause			Label	Length	Time (min)	Rate (um/min)	Frames of growth, retraction, or pause			Label	Length	Time (min)	Rate (um/min)	Frames of growth, retraction, or pause			Label	Length	Time (min)	Rate (um/min)	Frames of growth, retraction, or pause
1	MAX_V409A_30sec_15min_1um step 6um_.nd2:1	14.182	0				1	MAX_V409A_30sec_15min_1um step 6um_.nd2:1	14.326	0				1	MAX_V409A_30sec_15min_1um step 6um_.nd2:1	9.665	0				1	MAX_V409A_30sec_15min_1um step 6um_.nd2:1	24.986	0				1	MAX_V409A_30sec_15min_1um step 6um_.nd2:1	10.551	0				1	MAX_V409A_30sec_15min_1um step 6um_.nd2:1	43.853	0
2	MAX_V409A_30sec_15min_1um step 6um_.nd2:2	16.43	0.5	4.496	0.5+		2	MAX_V409A_30sec_15min_1um step 6um_.nd2:2	15.243	0.5	1.834			2	MAX_V409A_30sec_15min_1um step 6um_.nd2:2	9.665	0.5	0	0.5/		2	MAX_V409A_30sec_15min_1um step 6um_.nd2:2	26.919	0.5	3.866	0.5+		2	MAX_V409A_30sec_15min_1um step 6um_.nd2:2	10.551	0.5	0			2	MAX_V409A_30sec_15min_1um step 6um_.nd2:2	43.853	0.5	0	0.5/
3	MAX_V409A_30sec_15min_1um step 6um_.nd2:3	16.43	1	0			3	MAX_V409A_30sec_15min_1um step 6um_.nd2:3	15.479	1	0.472	1+		3	MAX_V409A_30sec_15min_1um step 6um_.nd2:3	13.172	1	7.014			3	MAX_V409A_30sec_15min_1um step 6um_.nd2:3	26.919	1	0	0.5/		3	MAX_V409A_30sec_15min_1um step 6um_.nd2:3	10.551	1	0			3	MAX_V409A_30sec_15min_1um step 6um_.nd2:3	46.11	1	4.514	0.5+
4	MAX_V409A_30sec_15min_1um step 6um_.nd2:4	16.43	1.5	0	1/		4	MAX_V409A_30sec_15min_1um step 6um_.nd2:4	13.94	1.5	-3.078	0.5-		4	MAX_V409A_30sec_15min_1um step 6um_.nd2:4	13.921	1.5	1.498	1+		4	MAX_V409A_30sec_15min_1um step 6um_.nd2:4	25.861	1.5	-2.116	0.5-		4	MAX_V409A_30sec_15min_1um step 6um_.nd2:4	10.551	1.5	0	1.5/		4	MAX_V409A_30sec_15min_1um step 6um_.nd2:4	46.11	1.5	0	0.5/
5	MAX_V409A_30sec_15min_1um step 6um_.nd2:5	19.073	2	5.286			5	MAX_V409A_30sec_15min_1um step 6um_.nd2:5	15.242	2	2.604			5	MAX_V409A_30sec_15min_1um step 6um_.nd2:5	13.921	2	0			5	MAX_V409A_30sec_15min_1um step 6um_.nd2:5	26.25	2	0.778			5	MAX_V409A_30sec_15min_1um step 6um_.nd2:5	8.378	2	-4.346	0.5-		5	MAX_V409A_30sec_15min_1um step 6um_.nd2:5	47.01	2	1.8	0.5+
6	MAX_V409A_30sec_15min_1um step 6um_.nd2:6	22.582	2.5	7.018	1+		6	MAX_V409A_30sec_15min_1um step 6um_.nd2:6	17.458	2.5	4.432			6	MAX_V409A_30sec_15min_1um step 6um_.nd2:6	13.921	2.5	0			6	MAX_V409A_30sec_15min_1um step 6um_.nd2:6	27.122	2.5	1.744	1+		6	MAX_V409A_30sec_15min_1um step 6um_.nd2:6	9.293	2.5	1.83			6	MAX_V409A_30sec_15min_1um step 6um_.nd2:6	47.01	2.5	0
7	MAX_V409A_30sec_15min_1um step 6um_.nd2:7	22.582	3	0			7	MAX_V409A_30sec_15min_1um step 6um_.nd2:7	18.515	3	2.114	1.5+		7	MAX_V409A_30sec_15min_1um step 6um_.nd2:7	13.921	3	0			7	MAX_V409A_30sec_15min_1um step 6um_.nd2:7	27.122	3	0			7	MAX_V409A_30sec_15min_1um step 6um_.nd2:7	9.9	3	1.214	1+		7	MAX_V409A_30sec_15min_1um step 6um_.nd2:7	47.01	3	0
8	MAX_V409A_30sec_15min_1um step 6um_.nd2:8	22.582	3.5	0			8	MAX_V409A_30sec_15min_1um step 6um_.nd2:8	18.515	3.5	0			8	MAX_V409A_30sec_15min_1um step 6um_.nd2:8	13.921	3.5	0			8	MAX_V409A_30sec_15min_1um step 6um_.nd2:8	27.122	3.5	0			8	MAX_V409A_30sec_15min_1um step 6um_.nd2:8	9.9	3.5	0			8	MAX_V409A_30sec_15min_1um step 6um_.nd2:8	47.01	3.5	0	1.5/
9	MAX_V409A_30sec_15min_1um step 6um_.nd2:9	22.582	4	0	1.5/		9	MAX_V409A_30sec_15min_1um step 6um_.nd2:9	18.515	4	0			9	MAX_V409A_30sec_15min_1um step 6um_.nd2:9	13.921	4	0			9	MAX_V409A_30sec_15min_1um step 6um_.nd2:9	27.122	4	0			9	MAX_V409A_30sec_15min_1um step 6um_.nd2:9	9.9	4	0			9	MAX_V409A_30sec_15min_1um step 6um_.nd2:9	48.168	4	2.316	0.5+
10	MAX_V409A_30sec_15min_1um step 6um_.nd2:10	23.005	4.5	0.846	0.5+		10	MAX_V409A_30sec_15min_1um step 6um_.nd2:10	18.515	4.5	0			10	MAX_V409A_30sec_15min_1um step 6um_.nd2:10	13.921	4.5	0			10	MAX_V409A_30sec_15min_1um step 6um_.nd2:10	27.122	4.5	0			10	MAX_V409A_30sec_15min_1um step 6um_.nd2:10	9.9	4.5	0	1.5/		10	MAX_V409A_30sec_15min_1um step 6um_.nd2:10	48.168	4.5	0	0.5/
11	MAX_V409A_30sec_15min_1um step 6um_.nd2:11	23.005	5	0			11	MAX_V409A_30sec_15min_1um step 6um_.nd2:11	18.515	5	0			11	MAX_V409A_30sec_15min_1um step 6um_.nd2:11	13.921	5	0			11	MAX_V409A_30sec_15min_1um step 6um_.nd2:11	27.122	5	0			11	MAX_V409A_30sec_15min_1um step 6um_.nd2:11	10.457	5	1.114			11	MAX_V409A_30sec_15min_1um step 6um_.nd2:11	50.114	5	3.892	0.5+
12	MAX_V409A_30sec_15min_1um step 6um_.nd2:12	23.005	5.5	0			12	MAX_V409A_30sec_15min_1um step 6um_.nd2:12	18.515	5.5	0			12	MAX_V409A_30sec_15min_1um step 6um_.nd2:12	13.921	5.5	0	4/		12	MAX_V409A_30sec_15min_1um step 6um_.nd2:12	27.122	5.5	0			12	MAX_V409A_30sec_15min_1um step 6um_.nd2:12	11.294	5.5	1.674	1+		12	MAX_V409A_30sec_15min_1um step 6um_.nd2:12	50.114	5.5	0
13	MAX_V409A_30sec_15min_1um step 6um_.nd2:13	23.005	6	0			13	MAX_V409A_30sec_15min_1um step 6um_.nd2:14	18.515	6	0	3/		13	MAX_V409A_30sec_15min_1um step 6um_.nd2:13	13.967	6	0.092	0.5+		13	MAX_V409A_30sec_15min_1um step 6um_.nd2:13	27.122	6	0			13	MAX_V409A_30sec_15min_1um step 6um_.nd2:13	11.294	6	0	0.5/		13	MAX_V409A_30sec_15min_1um step 6um_.nd2:13	50.114	6	0
14	MAX_V409A_30sec_15min_1um step 6um_.nd2:14	23.005	6.5	0	2/		14	MAX_V409A_30sec_15min_1um step 6um_.nd2:14	21.852	6.5	6.674	0.5+		14	MAX_V409A_30sec_15min_1um step 6um_.nd2:14	13.967	6.5	0			14	MAX_V409A_30sec_15min_1um step 6um_.nd2:14	27.122	6.5	0			14	MAX_V409A_30sec_15min_1um step 6um_.nd2:14	11.609	6.5	0.63			14	MAX_V409A_30sec_15min_1um step 6um_.nd2:14	50.114	6.5	0
15	MAX_V409A_30sec_15min_1um step 6um_.nd2:15	24.4	7	2.79	0.5+		15	MAX_V409A_30sec_15min_1um step 6um_.nd2:15	21.299	7	-1.106	0.5-		15	MAX_V409A_30sec_15min_1um step 6um_.nd2:15	13.967	7	0			15	MAX_V409A_30sec_15min_1um step 6um_.nd2:15	27.122	7	0	4.5/		15	MAX_V409A_30sec_15min_1um step 6um_.nd2:15	12.363	7	1.508			15	MAX_V409A_30sec_15min_1um step 6um_.nd2:15	50.114	7	0
16	MAX_V409A_30sec_15min_1um step 6um_.nd2:17	24.4	7.5	0			16	MAX_V409A_30sec_15min_1um step 6um_.nd2:16	23.301	7.5	4.004	0.5+		16	MAX_V409A_30sec_15min_1um step 6um_.nd2:16	13.967	7.5	0			16	MAX_V409A_30sec_15min_1um step 6um_.nd2:16	29.064	7.5	3.884	0.5+		16	MAX_V409A_30sec_15min_1um step 6um_.nd2:16	14.323	7.5	3.92	1.5+		16	MAX_V409A_30sec_15min_1um step 6um_.nd2:16	50.114	7.5	0
17	MAX_V409A_30sec_15min_1um step 6um_.nd2:17	24.4	8	0	1/		17	MAX_V409A_30sec_15min_1um step 6um_.nd2:17	22.116	8	-2.37			17	MAX_V409A_30sec_15min_1um step 6um_.nd2:17	13.967	8	0			17	MAX_V409A_30sec_15min_1um step 6um_.nd2:17	28.458	8	-1.212	0.5-		17	MAX_V409A_30sec_15min_1um step 6um_.nd2:17	14.033	8	-0.58			17	MAX_V409A_30sec_15min_1um step 6um_.nd2:17	50.114	8	0
18	MAX_V409A_30sec_15min_1um step 6um_.nd2:18	23.892	8.5	-1.016	0.5-		18	MAX_V409A_30sec_15min_1um step 6um_.nd2:18	21.702	8.5	-0.828	1-		18	MAX_V409A_30sec_15min_1um step 6um_.nd2:18	13.967	8.5	0			18	MAX_V409A_30sec_15min_1um step 6um_.nd2:18	30.339	8.5	3.762	0.5+		18	MAX_V409A_30sec_15min_1um step 6um_.nd2:18	13.195	8.5	-1.676	1-		18	MAX_V409A_30sec_15min_1um step 6um_.nd2:18	50.114	8.5	0
19	MAX_V409A_30sec_15min_1um step 6um_.nd2:19	24.056	9	0.328			19	MAX_V409A_30sec_15min_1um step 6um_.nd2:19	23.312	9	3.22	0.5+		19	MAX_V409A_30sec_15min_1um step 6um_.nd2:19	13.967	9	0			19	MAX_V409A_30sec_15min_1um step 6um_.nd2:19	30.339	9	0	0.5/		19	MAX_V409A_30sec_15min_1um step 6um_.nd2:19	16.59	9	6.79	0.5+		19	MAX_V409A_30sec_15min_1um step 6um_.nd2:19	50.114	9	0
20	MAX_V409A_30sec_15min_1um step 6um_.nd2:20	26	9.5	3.888	1+		20	MAX_V409A_30sec_15min_1um step 6um_.nd2:20	23.312	9.5	0			20	MAX_V409A_30sec_15min_1um step 6um_.nd2:20	13.967	9.5	0			20	MAX_V409A_30sec_15min_1um step 6um_.nd2:20	31.452	9.5	2.226	0.5+		20	MAX_V409A_30sec_15min_1um step 6um_.nd2:20	15.439	9.5	-2.302			20	MAX_V409A_30sec_15min_1um step 6um_.nd2:20	50.114	9.5	0
21	MAX_V409A_30sec_15min_1um step 6um_.nd2:21	26	10	0			21	MAX_V409A_30sec_15min_1um step 6um_.nd2:21	23.312	10	0	1/		21	MAX_V409A_30sec_15min_1um step 6um_.nd2:21	13.967	10	0			21	MAX_V409A_30sec_15min_1um step 6um_.nd2:21	31.138	10	-0.628	0.5-		21	MAX_V409A_30sec_15min_1um step 6um_.nd2:21	12.489	10	-5.9	1-		21	MAX_V409A_30sec_15min_1um step 6um_.nd2:21	50.114	10	0
22	MAX_V409A_30sec_15min_1um step 6um_.nd2:22	26	10.5	0			22	MAX_V409A_30sec_15min_1um step 6um_.nd2:22	25.98	10.5	5.336	0.5+		22	MAX_V409A_30sec_15min_1um step 6um_.nd2:22	13.967	10.5	0	4.5/		22	MAX_V409A_30sec_15min_1um step 6um_.nd2:22	32.44	10.5	2.604	0.5+		22	MAX_V409A_30sec_15min_1um step 6um_.nd2:22	13.642	10.5	2.306			22	MAX_V409A_30sec_15min_1um step 6um_.nd2:22	50.114	10.5	0
23	MAX_V409A_30sec_15min_1um step 6um_.nd2:23	26	11	0	1.5/		23	MAX_V409A_30sec_15min_1um step 6um_.nd2:23	25.471	11	-1.018	0.5-		23	MAX_V409A_30sec_15min_1um step 6um_.nd2:23	14.593	11	1.252			23	MAX_V409A_30sec_15min_1um step 6um_.nd2:23	32.44	11	0			23	MAX_V409A_30sec_15min_1um step 6um_.nd2:23	13.978	11	0.672	1+		23	MAX_V409A_30sec_15min_1um step 6um_.nd2:23	50.114	11	0
24	MAX_V409A_30sec_15min_1um step 6um_.nd2:24	23.739	11.5	-4.522	0.5-		24	MAX_V409A_30sec_15min_1um step 6um_.nd2:24	26.239	11.5	1.536	0.5+		24	MAX_V409A_30sec_15min_1um step 6um_.nd2:24	17.006	11.5	4.826	1+		24	MAX_V409A_30sec_15min_1um step 6um_.nd2:24	32.44	11.5	0			24	MAX_V409A_30sec_15min_1um step 6um_.nd2:24	11.903	11.5	-4.15	0.5-		24	MAX_V409A_30sec_15min_1um step 6um_.nd2:24	50.114	11.5	0
25	MAX_V409A_30sec_15min_1um step 6um_.nd2:25	23.739	12	0			25	MAX_V409A_30sec_15min_1um step 6um_.nd2:25	26.239	12	0			25	MAX_V409A_30sec_15min_1um step 6um_.nd2:25	16.977	12	-0.058	0.5-		25	MAX_V409A_30sec_15min_1um step 6um_.nd2:25	32.44	12	0	1.5/		25	MAX_V409A_30sec_15min_1um step 6um_.nd2:25	12.309	12	0.812			25	MAX_V409A_30sec_15min_1um step 6um_.nd2:25	50.114	12	0
26	MAX_V409A_30sec_15min_1um step 6um_.nd2:26	23.739	12.5	0			26	MAX_V409A_30sec_15min_1um step 6um_.nd2:26	26.239	12.5	0			26	MAX_V409A_30sec_15min_1um step 6um_.nd2:26	18.977	12.5	4	0.5/		26	MAX_V409A_30sec_15min_1um step 6um_.nd2:26	28.994	12.5	-6.892	0.5-		26	MAX_V409A_30sec_15min_1um step 6um_.nd2:26	14.163	12.5	3.708	1+		26	MAX_V409A_30sec_15min_1um step 6um_.nd2:26	50.114	12.5	0
27	MAX_V409A_30sec_15min_1um step 6um_.nd2:27	23.739	13	0	1.5/		27	MAX_V409A_30sec_15min_1um step 6um_.nd2:27	26.239	13	0			27	MAX_V409A_30sec_15min_1um step 6um_.nd2:27	17.278	13	-3.398			27	MAX_V409A_30sec_15min_1um step 6um_.nd2:27	28.994	13	0	0.5/		27	MAX_V409A_30sec_15min_1um step 6um_.nd2:27	14.163	13	0	0.5/		27	MAX_V409A_30sec_15min_1um step 6um_.nd2:27	50.114	13	0
28	MAX_V409A_30sec_15min_1um step 6um_.nd2:28	25.987	13.5	4.496	0.5+		28	MAX_V409A_30sec_15min_1um step 6um_.nd2:28	26.239	13.5	0			28	MAX_V409A_30sec_15min_1um step 6um_.nd2:28	15.14	13.5	-4.276			28	MAX_V409A_30sec_15min_1um step 6um_.nd2:28	29.555	13.5	1.122			28	MAX_V409A_30sec_15min_1um step 6um_.nd2:28	13.43	13.5	-1.466			28	MAX_V409A_30sec_15min_1um step 6um_.nd2:28	50.114	13.5	0
29	MAX_V409A_30sec_15min_1um step 6um_.nd2:29	25.987	14	0	0.5/		29	MAX_V409A_30sec_15min_1um step 6um_.nd2:29	26.239	14	0			29	MAX_V409A_30sec_15min_1um step 6um_.nd2:29	14.223	14	-1.834			29	MAX_V409A_30sec_15min_1um step 6um_.nd2:29	31.661	14	4.212	1+		29	MAX_V409A_30sec_15min_1um step 6um_.nd2:29	12.312	14	-2.236			29	MAX_V409A_30sec_15min_1um step 6um_.nd2:29	50.114	14	0
30	MAX_V409A_30sec_15min_1um step 6um_.nd2:30	24.514	14.5	-2.946	0.5-		30	MAX_V409A_30sec_15min_1um step 6um_.nd2:30	26.239	14.5	0			30	MAX_V409A_30sec_15min_1um step 6um_.nd2:30	14.136	14.5	-0.174	2-		30	MAX_V409A_30sec_15min_1um step 6um_.nd2:30	31.189	14.5	-0.944	0.5-		30	MAX_V409A_30sec_15min_1um step 6um_.nd2:30	12.141	14.5	-0.342			30	MAX_V409A_30sec_15min_1um step 6um_.nd2:30	50.114	14.5	0
31	MAX_V409A_30sec_15min_1um step 6um_.nd2:31	24.514	15	0	0.5/		31	MAX_V409A_30sec_15min_1um step 6um_.nd2:31	26.239	15	0	3.5/		31	MAX_V409A_30sec_15min_1um step 6um_.nd2:31	14.339	15	0.406	0.5+		31	MAX_V409A_30sec_15min_1um step 6um_.nd2:31	32.596	15	2.814	0.5+		31	MAX_V409A_30sec_15min_1um step 6um_.nd2:31	11.746	15	-0.79	2-		31	MAX_V409A_30sec_15min_1um step 6um_.nd2:31	50.114	15	0	10/
V409A_30sec_15min_1um step 6um_002
Branch point x, y: x=136.89(327), y=34.33(82)							Branch point x, y: x=181.68(434), y=61.54(147)
	Label	Length	Time (min)	Rate (um/min)	Frames of growth, retraction, or pause			Label	Length	Time (min)	Rate (um/min)	Frames of growth, retraction, or pause
1	MAX_V409A_30sec_15min_1um step 6um_002.nd2:1	25.399	0				1	MAX_V409A_30sec_15min_1um step 6um_002.nd2:1	0	0
2	MAX_V409A_30sec_15min_1um step 6um_002.nd2:2	26.296	0.5	1.794			2	MAX_V409A_30sec_15min_1um step 6um_002.nd2:2	0.509	0.5	1.018
3	MAX_V409A_30sec_15min_1um step 6um_002.nd2:3	27.854	1	3.116	1+		3	MAX_V409A_30sec_15min_1um step 6um_002.nd2:3	0.884	1	0.75	1+
4	MAX_V409A_30sec_15min_1um step 6um_002.nd2:4	27.854	1.5	0			4	MAX_V409A_30sec_15min_1um step 6um_002.nd2:4	0.884	1.5	0	0.5/
5	MAX_V409A_30sec_15min_1um step 6um_002.nd2:5	27.854	2	0			5	MAX_V409A_30sec_15min_1um step 6um_002.nd2:5	1.078	2	0.388
6	MAX_V409A_30sec_15min_1um step 6um_002.nd2:6	27.854	2.5	0			6	MAX_V409A_30sec_15min_1um step 6um_002.nd2:6	2.235	2.5	2.314
7	MAX_V409A_30sec_15min_1um step 6um_002.nd2:7	27.854	3	0	2/		7	MAX_V409A_30sec_15min_1um step 6um_002.nd2:7	3.807	3	3.144
8	MAX_V409A_30sec_15min_1um step 6um_002.nd2:8	31.762	3.5	7.816	0.5+		8	MAX_V409A_30sec_15min_1um step 6um_002.nd2:8	5.945	3.5	4.276
9	MAX_V409A_30sec_15min_1um step 6um_002.nd2:9	28.87	4	-5.784	0.5-		9	MAX_V409A_30sec_15min_1um step 6um_002.nd2:9	7.696	4	3.502	2.5+
10	MAX_V409A_30sec_15min_1um step 6um_002.nd2:10	30.243	4.5	2.746	0.5+		10	MAX_V409A_30sec_15min_1um step 6um_002.nd2:10	6.307	4.5	-2.778	0.5-
11	MAX_V409A_30sec_15min_1um step 6um_002.nd2:11	30.243	5	0	0.5/		11	MAX_V409A_30sec_15min_1um step 6um_002.nd2:11	7.116	5	1.618
12	MAX_V409A_30sec_15min_1um step 6um_002.nd2:12	30.546	5.5	0.606			12	MAX_V409A_30sec_15min_1um step 6um_002.nd2:12	7.2	5.5	0.168
13	MAX_V409A_30sec_15min_1um step 6um_002.nd2:13	33.192	6	5.292			13	MAX_V409A_30sec_15min_1um step 6um_002.nd2:13	7.478	6	0.556	1.5+
14	MAX_V409A_30sec_15min_1um step 6um_002.nd2:14	35.98	6.5	5.576	1.5+		14	MAX_V409A_30sec_15min_1um step 6um_002.nd2:14	7.104	6.5	-0.748	0.5-
15	MAX_V409A_30sec_15min_1um step 6um_002.nd2:15	35.98	7	0			15	MAX_V409A_30sec_15min_1um step 6um_002.nd2:15	7.392	7	0.576
16	MAX_V409A_30sec_15min_1um step 6um_002.nd2:16	35.98	7.5	0			16	MAX_V409A_30sec_15min_1um step 6um_002.nd2:16	8.302	7.5	1.82
17	MAX_V409A_30sec_15min_1um step 6um_002.nd2:17	35.98	8	0			17	MAX_V409A_30sec_15min_1um step 6um_002.nd2:17	10.247	8	3.89	1.5+
18	MAX_V409A_30sec_15min_1um step 6um_002.nd2:18	35.98	8.5	0			18	MAX_V409A_30sec_15min_1um step 6um_002.nd2:18	10.247	8.5	0	0.5/
19	MAX_V409A_30sec_15min_1um step 6um_002.nd2:19	35.98	9	0	2.5/		19	MAX_V409A_30sec_15min_1um step 6um_002.nd2:19	9.653	9	-1.188	0.5-
20	MAX_V409A_30sec_15min_1um step 6um_002.nd2:20	37.022	9.5	2.084			20	MAX_V409A_30sec_15min_1um step 6um_002.nd2:20	11.101	9.5	2.896	0.5+
21	MAX_V409A_30sec_15min_1um step 6um_002.nd2:21	38.273	10	2.502	1+		21	MAX_V409A_30sec_15min_1um step 6um_002.nd2:21	11.101	10	0	0.5/
22	MAX_V409A_30sec_15min_1um step 6um_002.nd2:22	38.273	10.5	0			22	MAX_V409A_30sec_15min_1um step 6um_002.nd2:22	12.885	10.5	3.568	0.5+
23	MAX_V409A_30sec_15min_1um step 6um_002.nd2:23	38.273	11	0	1/		23	MAX_V409A_30sec_15min_1um step 6um_002.nd2:23	12.885	11	0	0.5/
24	MAX_V409A_30sec_15min_1um step 6um_002.nd2:24	38.707	11.5	0.868	0.5+		24	MAX_V409A_30sec_15min_1um step 6um_002.nd2:24	13.136	11.5	0.502
25	MAX_V409A_30sec_15min_1um step 6um_002.nd2:25	38.707	12	0	0.5/		25	MAX_V409A_30sec_15min_1um step 6um_002.nd2:25	15.057	12	3.842
26	MAX_V409A_30sec_15min_1um step 6um_002.nd2:26	38.303	12.5	-0.808			26	MAX_V409A_30sec_15min_1um step 6um_002.nd2:26	16.563	12.5	3.012
27	MAX_V409A_30sec_15min_1um step 6um_002.nd2:27	38.222	13	-0.162	1-		27	MAX_V409A_30sec_15min_1um step 6um_002.nd2:27	19.074	13	5.022	2+
28	MAX_V409A_30sec_15min_1um step 6um_002.nd2:28	38.222	13.5	0			28	MAX_V409A_30sec_15min_1um step 6um_002.nd2:28	19.074	13.5	0
29	MAX_V409A_30sec_15min_1um step 6um_002.nd2:29	38.222	14	0			29	MAX_V409A_30sec_15min_1um step 6um_002.nd2:29	19.074	14	0	1/
30	MAX_V409A_30sec_15min_1um step 6um_002.nd2:30	38.222	14.5	0			30	MAX_V409A_30sec_15min_1um step 6um_002.nd2:30	20.4	14.5	2.652
31	MAX_V409A_30sec_15min_1um step 6um_002.nd2:31	38.222	15	0	2/		31	MAX_V409A_30sec_15min_1um step 6um_002.nd2:31	21.123	15	1.446	1+

## Sheet: WT (3)
03.09.22
WT_30sec_15min_1um step 6um_001
Branch point x, y: x=111.77(267), y=36.84(88)							Branch point x, y: x=26.37(63), y=59.86(143)							Branch point x, y: x=129.35(309), y=76.19(182)
	Label	Length	Time (min)	Rate (um/min)	Frames of growth, retraction, or pause			Label	Length	Time (min)	Rate (um/min)	Frames of growth, retraction, or pause			Label	Length	Time (min)	Rate (um/min)	Frames of growth, retraction, or pause
1	MAX_WT_30sec_15min_1um step 6um_001.nd2:1	41.181	0				1	MAX_WT_30sec_15min_1um step 6um_001.nd2:1	5.342	0				1	MAX_WT_30sec_15min_1um step 6um_001.nd2:1	14.551	0
2	MAX_WT_30sec_15min_1um step 6um_001.nd2:2	41.181	0.5	0			2	MAX_WT_30sec_15min_1um step 6um_001.nd2:2	4.761	0.5	-1.162			2	MAX_WT_30sec_15min_1um step 6um_001.nd2:2	14.551	0.5	0
3	MAX_WT_30sec_15min_1um step 6um_001.nd2:3	41.181	1	0	1/		3	MAX_WT_30sec_15min_1um step 6um_001.nd2:3	3.084	1	-3.354			3	MAX_WT_30sec_15min_1um step 6um_001.nd2:3	14.551	1	0
4	MAX_WT_30sec_15min_1um step 6um_001.nd2:4	42.432	1.5	2.502			4	MAX_WT_30sec_15min_1um step 6um_001.nd2:4	2.235	1.5	-1.698	1.5-		4	MAX_WT_30sec_15min_1um step 6um_001.nd2:4	14.551	1.5	0	1.5/
5	MAX_WT_30sec_15min_1um step 6um_001.nd2:5	42.633	2	0.402			5	MAX_WT_30sec_15min_1um step 6um_001.nd2:5	4.043	2	3.616			5	MAX_WT_30sec_15min_1um step 6um_001.nd2:5	15.543	2	1.984	0.5+
6	MAX_WT_30sec_15min_1um step 6um_001.nd2:6	43.382	2.5	1.498	1.5+		6	MAX_WT_30sec_15min_1um step 6um_001.nd2:6	5.044	2.5	2.002			6	MAX_WT_30sec_15min_1um step 6um_001.nd2:6	15.543	2.5	0	0.5/
7	MAX_WT_30sec_15min_1um step 6um_001.nd2:7	41.851	3	-3.062			7	MAX_WT_30sec_15min_1um step 6um_001.nd2:7	5.809	3	1.53			7	MAX_WT_30sec_15min_1um step 6um_001.nd2:7	15.215	3	-0.656
8	MAX_WT_30sec_15min_1um step 6um_001.nd2:8	39.782	3.5	-4.138			8	MAX_WT_30sec_15min_1um step 6um_001.nd2:8	6.829	3.5	2.04	2+		8	MAX_WT_30sec_15min_1um step 6um_001.nd2:8	14.948	3.5	-0.534	1-
9	MAX_WT_30sec_15min_1um step 6um_001.nd2:9	39.408	4	-0.748	1.5-		9	MAX_WT_30sec_15min_1um step 6um_001.nd2:9	6.829	4	0	0.5/		9	MAX_WT_30sec_15min_1um step 6um_001.nd2:9	14.948	4	0
10	MAX_WT_30sec_15min_1um step 6um_001.nd2:10	39.445	4.5	0.074	0.5+		10	MAX_WT_30sec_15min_1um step 6um_001.nd2:10	6.141	4.5	-1.376			10	MAX_WT_30sec_15min_1um step 6um_001.nd2:10	14.948	4.5	0	1/
11	MAX_WT_30sec_15min_1um step 6um_001.nd2:11	38.024	5	-2.842			11	MAX_WT_30sec_15min_1um step 6um_001.nd2:11	5.514	5	-1.254			11	MAX_WT_30sec_15min_1um step 6um_001.nd2:11	15.682	5	1.468
12	MAX_WT_30sec_15min_1um step 6um_001.nd2:12	37.987	5.5	-0.074			12	MAX_WT_30sec_15min_1um step 6um_001.nd2:12	4.81	5.5	-1.408	1.5-		12	MAX_WT_30sec_15min_1um step 6um_001.nd2:12	16.565	5.5	1.766
13	MAX_WT_30sec_15min_1um step 6um_001.nd2:13	37.738	6	-0.498	1.5-		13	MAX_WT_30sec_15min_1um step 6um_001.nd2:13	4.872	6	0.124	0.5+		13	MAX_WT_30sec_15min_1um step 6um_001.nd2:13	17.507	6	1.884
14	MAX_WT_30sec_15min_1um step 6um_001.nd2:14	37.738	6.5	0	0.5/		14	MAX_WT_30sec_15min_1um step 6um_001.nd2:14	2.902	6.5	-3.94			14	MAX_WT_30sec_15min_1um step 6um_001.nd2:14	17.942	6.5	0.87	2+
15	MAX_WT_30sec_15min_1um step 6um_001.nd2:15	37.478	7	-0.52	0.5-		15	MAX_WT_30sec_15min_1um step 6um_001.nd2:15	2.629	7	-0.546	1-		15	MAX_WT_30sec_15min_1um step 6um_001.nd2:15	17.942	7	0	0.5/
16	MAX_WT_30sec_15min_1um step 6um_001.nd2:16	37.478	7.5	0			16	MAX_WT_30sec_15min_1um step 6um_001.nd2:16	3.841	7.5	2.424			16	MAX_WT_30sec_15min_1um step 6um_001.nd2:16	18.32	7.5	0.756
17	MAX_WT_30sec_15min_1um step 6um_001.nd2:17	37.478	8	0	1/		17	MAX_WT_30sec_15min_1um step 6um_001.nd2:17	5.846	8	4.01			17	MAX_WT_30sec_15min_1um step 6um_001.nd2:17	19.22	8	1.8	1+
18	MAX_WT_30sec_15min_1um step 6um_001.nd2:18	37.145	8.5	-0.666			18	MAX_WT_30sec_15min_1um step 6um_001.nd2:18	8.168	8.5	4.644	1.5+		18	MAX_WT_30sec_15min_1um step 6um_001.nd2:18	19.22	8.5	0	0.5/
19	MAX_WT_30sec_15min_1um step 6um_001.nd2:19	36.253	9	-1.784	1-		19	MAX_WT_30sec_15min_1um step 6um_001.nd2:19	6.252	9	-3.832	0.5-		19	MAX_WT_30sec_15min_1um step 6um_001.nd2:19	19.655	9	0.87	0.5+
20	MAX_WT_30sec_15min_1um step 6um_001.nd2:20	36.253	9.5	0	0.5/		20	MAX_WT_30sec_15min_1um step 6um_001.nd2:20	6.824	9.5	1.144	0.5+		20	MAX_WT_30sec_15min_1um step 6um_001.nd2:20	19.435	9.5	-0.44	0.5-
21	MAX_WT_30sec_15min_1um step 6um_001.nd2:21	36.411	10	0.316	0.5+		21	MAX_WT_30sec_15min_1um step 6um_001.nd2:21	6.824	10	0	0.5/		21	MAX_WT_30sec_15min_1um step 6um_001.nd2:21	20.539	10	2.208
22	MAX_WT_30sec_15min_1um step 6um_001.nd2:22	36.411	10.5	0	0.5/		22	MAX_WT_30sec_15min_1um step 6um_001.nd2:22	7.687	10.5	1.726			22	MAX_WT_30sec_15min_1um step 6um_001.nd2:22	21.079	10.5	1.08
23	MAX_WT_30sec_15min_1um step 6um_001.nd2:23	35.082	11	-2.658			23	MAX_WT_30sec_15min_1um step 6um_001.nd2:23	8.236	11	1.098			23	MAX_WT_30sec_15min_1um step 6um_001.nd2:23	21.673	11	1.188
24	MAX_WT_30sec_15min_1um step 6um_001.nd2:24	33.801	11.5	-2.562	1-		24	MAX_WT_30sec_15min_1um step 6um_001.nd2:24	9.557	11.5	2.642	1.5+		24	MAX_WT_30sec_15min_1um step 6um_001.nd2:24	22.326	11.5	1.306	2+
25	MAX_WT_30sec_15min_1um step 6um_001.nd2:25	33.801	12	0			25	MAX_WT_30sec_15min_1um step 6um_001.nd2:25	7.661	12	-3.792	0.5-		25	MAX_WT_30sec_15min_1um step 6um_001.nd2:25	22.326	12	0	0.5/
26	MAX_WT_30sec_15min_1um step 6um_001.nd2:26	33.801	12.5	0	1/		26	MAX_WT_30sec_15min_1um step 6um_001.nd2:26	10.141	12.5	4.96	0.5+		26	MAX_WT_30sec_15min_1um step 6um_001.nd2:28	22.5	12.5	0.348	0.5+
27	MAX_WT_30sec_15min_1um step 6um_001.nd2:27	35.917	13	4.232	0.5+		27	MAX_WT_30sec_15min_1um step 6um_001.nd2:27	9.621	13	-1.04			27	MAX_WT_30sec_15min_1um step 6um_001.nd2:29	22.5	13	0	0.5/
28	MAX_WT_30sec_15min_1um step 6um_001.nd2:28	35.917	13.5	0	0.5/		28	MAX_WT_30sec_15min_1um step 6um_001.nd2:28	7.832	13.5	-3.578			28	MAX_WT_30sec_15min_1um step 6um_001.nd2:30	23.336	13.5	1.672
29	MAX_WT_30sec_15min_1um step 6um_001.nd2:29	36.407	14	0.98			29	MAX_WT_30sec_15min_1um step 6um_001.nd2:29	6.02	14	-3.624	1.5-		29	MAX_WT_30sec_15min_1um step 6um_001.nd2:31	23.718	14	0.764	1+
30	MAX_WT_30sec_15min_1um step 6um_001.nd2:30	36.763	14.5	0.712			30	MAX_WT_30sec_15min_1um step 6um_001.nd2:30	8.566	14.5	5.092
31	MAX_WT_30sec_15min_1um step 6um_001.nd2:31	37.489	15	1.452	1.5+		31	MAX_WT_30sec_15min_1um step 6um_001.nd2:31	10.734	15	4.336	1+
WT_30sec_15min_1um step 6um_002
Soma x, y: x=160.75(384), y=65.72(157)
	Label	Length	Time (min)	Rate (um/min)	Frames of growth, retraction, or pause
1	MAX_WT_30sec_15min_1um step 6um_002.nd2:1	46.311	0
2	MAX_WT_30sec_15min_1um step 6um_002.nd2:2	46.311	0.5	0	0.5/
3	MAX_WT_30sec_15min_1um step 6um_002.nd2:3	47.867	1	3.112
4	MAX_WT_30sec_15min_1um step 6um_002.nd2:4	48.206	1.5	0.678
5	MAX_WT_30sec_15min_1um step 6um_002.nd2:5	48.915	2	1.418
6	MAX_WT_30sec_15min_1um step 6um_002.nd2:6	50.831	2.5	3.832	2+
7	MAX_WT_30sec_15min_1um step 6um_002.nd2:7	46.154	3	-9.354	0.5-
8	MAX_WT_30sec_15min_1um step 6um_002.nd2:8	47.945	3.5	3.582
9	MAX_WT_30sec_15min_1um step 6um_002.nd2:9	49.783	4	3.676	1+
10	MAX_WT_30sec_15min_1um step 6um_002.nd2:10	48.92	4.5	-1.726	0.5-
11	MAX_WT_30sec_15min_1um step 6um_002.nd2:11	48.92	5	0	0.5/
12	MAX_WT_30sec_15min_1um step 6um_002.nd2:12	49.986	5.5	2.132	0.5+
13	MAX_WT_30sec_15min_1um step 6um_002.nd2:13	48.888	6	-2.196	0.5-
14	MAX_WT_30sec_15min_1um step 6um_002.nd2:14	50.066	6.5	2.356
15	MAX_WT_30sec_15min_1um step 6um_002.nd2:15	52.665	7	5.198	1+
16	MAX_WT_30sec_15min_1um step 6um_002.nd2:16	48.886	7.5	-7.558	0.5-
17	MAX_WT_30sec_15min_1um step 6um_002.nd2:17	50.245	8	2.718
18	MAX_WT_30sec_15min_1um step 6um_002.nd2:18	52.376	8.5	4.262
19	MAX_WT_30sec_15min_1um step 6um_002.nd2:19	54.998	9	5.244
20	MAX_WT_30sec_15min_1um step 6um_002.nd2:20	58.316	9.5	6.636
21	MAX_WT_30sec_15min_1um step 6um_002.nd2:21	61.117	10	5.602
22	MAX_WT_30sec_15min_1um step 6um_002.nd2:22	61.233	10.5	0.232	3+
23	MAX_WT_30sec_15min_1um step 6um_002.nd2:23	61.233	11	0
24	MAX_WT_30sec_15min_1um step 6um_002.nd2:24	61.233	11.5	0
25	MAX_WT_30sec_15min_1um step 6um_002.nd2:25	61.233	12	0	1.5/
26	MAX_WT_30sec_15min_1um step 6um_002.nd2:26	59.48	12.5	-3.506	0.5-
27	MAX_WT_30sec_15min_1um step 6um_002.nd2:27	60.922	13	2.884	0.5+
28	MAX_WT_30sec_15min_1um step 6um_002.nd2:28	59.224	13.5	-3.396	0.5-
29	MAX_WT_30sec_15min_1um step 6um_002.nd2:29	59.224	14	0	0.5/
30	MAX_WT_30sec_15min_1um step 6um_002.nd2:30	61.502	14.5	4.556
31	MAX_WT_30sec_15min_1um step 6um_002.nd2:31	62.798	15	2.592	1+
WT_30sec_15min_1um step 6um_003
Soma x, y: x=135.63(324), y=93.35(223)
	Label	Length	Time (min)	Rate (um/min)	Frames of growth, retraction, or pause
1	MAX_WT_30sec_15min_1um step 6um_003.nd2:1	25.464	0
2	MAX_WT_30sec_15min_1um step 6um_003.nd2:2	25.619	0.5	0.31
3	MAX_WT_30sec_15min_1um step 6um_003.nd2:3	27.783	1	4.328	1+
4	MAX_WT_30sec_15min_1um step 6um_003.nd2:4	27.783	1.5	0	0.5/
5	MAX_WT_30sec_15min_1um step 6um_003.nd2:5	24.547	2	-6.472	0.5-
6	MAX_WT_30sec_15min_1um step 6um_003.nd2:6	28.157	2.5	7.22	0.5+
7	MAX_WT_30sec_15min_1um step 6um_003.nd2:7	27.461	3	-1.392
8	MAX_WT_30sec_15min_1um step 6um_003.nd2:8	26.266	3.5	-2.39	1-
9	MAX_WT_30sec_15min_1um step 6um_003.nd2:9	27.893	4	3.254
10	MAX_WT_30sec_15min_1um step 6um_003.nd2:10	31.288	4.5	6.79	1+
11	MAX_WT_30sec_15min_1um step 6um_003.nd2:11	30.776	5	-1.024	0.5-
12	MAX_WT_30sec_15min_1um step 6um_003.nd2:12	31.649	5.5	1.746	0.5+
13	MAX_WT_30sec_15min_1um step 6um_003.nd2:13	31.649	6	0
14	MAX_WT_30sec_15min_1um step 6um_003.nd2:14	31.649	6.5	0	1/
15	MAX_WT_30sec_15min_1um step 6um_003.nd2:15	29.633	7	-4.032
16	MAX_WT_30sec_15min_1um step 6um_003.nd2:16	27.995	7.5	-3.276	1-
17	MAX_WT_30sec_15min_1um step 6um_003.nd2:17	27.995	8	0	0.5/
18	MAX_WT_30sec_15min_1um step 6um_003.nd2:18	32.056	8.5	8.122	0.5+
19	MAX_WT_30sec_15min_1um step 6um_003.nd2:19	28.571	9	-6.97	0.5-
20	MAX_WT_30sec_15min_1um step 6um_003.nd2:20	28.571	9.5	0	0.5/
21	MAX_WT_30sec_15min_1um step 6um_003.nd2:21	30.196	10	3.25	0.5+
22	MAX_WT_30sec_15min_1um step 6um_003.nd2:22	28.777	10.5	-2.838	0.5-
23	MAX_WT_30sec_15min_1um step 6um_003.nd2:23	29.099	11	0.644
24	MAX_WT_30sec_15min_1um step 6um_003.nd2:24	30.107	11.5	2.016	1+
25	MAX_WT_30sec_15min_1um step 6um_003.nd2:25	26.208	12	-7.798	0.5-
26	MAX_WT_30sec_15min_1um step 6um_003.nd2:26	28.878	12.5	5.34	0.5+
27	MAX_WT_30sec_15min_1um step 6um_003.nd2:27	27.074	13	-3.608	0.5-
28	MAX_WT_30sec_15min_1um step 6um_003.nd2:28	33.07	13.5	11.992	0.5+
29	MAX_WT_30sec_15min_1um step 6um_003.nd2:29	26.771	14	-12.598	0.5-
30	MAX_WT_30sec_15min_1um step 6um_003.nd2:30	26.771	14.5	0
31	MAX_WT_30sec_15min_1um step 6um_003.nd2:31	28.576	15	3.61	1+

## Sheet: V409I (3)
03.09.22
V409I_30sec_15min_1um step 6um_001
Soma x, y: x=135.63(324), y=77.03(184)							Branch point x, y: x=98.38(235), y=87.08(208)
	Label	Length	Time (min)	Rate (um/min)	Frames of growth, retraction, or pause			Label	Length	Time (min)	Rate (um/min)	Frames of growth, retraction, or pause
1	MAX_V409I_30sec_15min_1um step 6um_001.nd2:1	38.501	0				1	MAX_V409I_30sec_15min_1um step 6um_001.nd2:1	26.758	0
2	MAX_V409I_30sec_15min_1um step 6um_001.nd2:2	40.392	0.5	3.782			2	MAX_V409I_30sec_15min_1um step 6um_001.nd2:2	26.758	0.5	0	0.5/
3	MAX_V409I_30sec_15min_1um step 6um_001.nd2:3	41.47	1	2.156			3	MAX_V409I_30sec_15min_1um step 6um_001.nd2:3	26.042	1	-1.432	0.5-
4	MAX_V409I_30sec_15min_1um step 6um_001.nd2:4	44.061	1.5	5.182	1.5+		4	MAX_V409I_30sec_15min_1um step 6um_001.nd2:4	26.042	1.5	0	0.5/
5	MAX_V409I_30sec_15min_1um step 6um_001.nd2:5	41.999	2	-4.124			5	MAX_V409I_30sec_15min_1um step 6um_001.nd2:5	23.889	2	-4.306	0.5-
6	MAX_V409I_30sec_15min_1um step 6um_001.nd2:6	40.89	2.5	-2.218	1-		6	MAX_V409I_30sec_15min_1um step 6um_001.nd2:6	24.701	2.5	1.624
7	MAX_V409I_30sec_15min_1um step 6um_001.nd2:7	41.77	3	1.76			7	MAX_V409I_30sec_15min_1um step 6um_001.nd2:7	26.337	3	3.272
8	MAX_V409I_30sec_15min_1um step 6um_001.nd2:8	42.681	3.5	1.822			8	MAX_V409I_30sec_15min_1um step 6um_001.nd2:8	26.355	3.5	0.036	1.5+
9	MAX_V409I_30sec_15min_1um step 6um_001.nd2:9	44.724	4	4.086			9	MAX_V409I_30sec_15min_1um step 6um_001.nd2:9	26.324	4	-0.062	0.5-
10	MAX_V409I_30sec_15min_1um step 6um_001.nd2:10	45.933	4.5	2.418	2+		10	MAX_V409I_30sec_15min_1um step 6um_001.nd2:10	27.433	4.5	2.218	0.5+
11	MAX_V409I_30sec_15min_1um step 6um_001.nd2:11	45.933	5	0	0.5/		11	MAX_V409I_30sec_15min_1um step 6um_001.nd2:11	26.403	5	-2.06
12	MAX_V409I_30sec_15min_1um step 6um_001.nd2:12	45.871	5.5	-0.124			12	MAX_V409I_30sec_15min_1um step 6um_001.nd2:12	25.278	5.5	-2.25	1-
13	MAX_V409I_30sec_15min_1um step 6um_001.nd2:13	45.021	6	-1.7	1-		13	MAX_V409I_30sec_15min_1um step 6um_001.nd2:13	25.278	6	0	0.5/
14	MAX_V409I_30sec_15min_1um step 6um_001.nd2:14	45.275	6.5	0.508	0.5+		14	MAX_V409I_30sec_15min_1um step 6um_001.nd2:14	24.932	6.5	-0.692	0.5-
15	MAX_V409I_30sec_15min_1um step 6um_001.nd2:15	43.805	7	-2.94	0.5-		15	MAX_V409I_30sec_15min_1um step 6um_001.nd2:15	26.531	7	3.198	0.5+
16	MAX_V409I_30sec_15min_1um step 6um_001.nd2:16	43.805	7.5	0			16	MAX_V409I_30sec_15min_1um step 6um_001.nd2:16	26.531	7.5	0
17	MAX_V409I_30sec_15min_1um step 6um_001.nd2:17	43.805	8	0	1/		17	MAX_V409I_30sec_15min_1um step 6um_001.nd2:17	26.531	8	0	1/
18	MAX_V409I_30sec_15min_1um step 6um_001.nd2:18	44.886	8.5	2.162			18	MAX_V409I_30sec_15min_1um step 6um_001.nd2:18	24.287	8.5	-4.488	0.5-
19	MAX_V409I_30sec_15min_1um step 6um_001.nd2:19	46.456	9	3.14	1+		19	MAX_V409I_30sec_15min_1um step 6um_001.nd2:19	24.287	9	0	0.5/
20	MAX_V409I_30sec_15min_1um step 6um_001.nd2:20	46.456	9.5	0	0.5/		20	MAX_V409I_30sec_15min_1um step 6um_001.nd2:20	24.132	9.5	-0.31	0.5-
21	MAX_V409I_30sec_15min_1um step 6um_001.nd2:21	45.148	10	-2.616	0.5-		21	MAX_V409I_30sec_15min_1um step 6um_001.nd2:21	24.883	10	1.502	0.5+
22	MAX_V409I_30sec_15min_1um step 6um_001.nd2:22	45.148	10.5	0	0.5/		22	MAX_V409I_30sec_15min_1um step 6um_001.nd2:22	24.883	10.5	0
23	MAX_V409I_30sec_15min_1um step 6um_001.nd2:23	44.487	11	-1.322	0.5-		23	MAX_V409I_30sec_15min_1um step 6um_001.nd2:23	24.883	11	0
24	MAX_V409I_30sec_15min_1um step 6um_001.nd2:24	44.487	11.5	0			24	MAX_V409I_30sec_15min_1um step 6um_001.nd2:24	24.883	11.5	0	1.5/
25	MAX_V409I_30sec_15min_1um step 6um_001.nd2:25	44.487	12	0	1/		25	MAX_V409I_30sec_15min_1um step 6um_001.nd2:25	25.163	12	0.56	0.5+
26	MAX_V409I_30sec_15min_1um step 6um_001.nd2:26	44.32	12.5	-0.334	0.5-		26	MAX_V409I_30sec_15min_1um step 6um_001.nd2:26	25.163	12.5	0	0.5/
27	MAX_V409I_30sec_15min_1um step 6um_001.nd2:27	45.146	13	1.652	0.5+		27	MAX_V409I_30sec_15min_1um step 6um_001.nd2:27	26.668	13	3.01
28	MAX_V409I_30sec_15min_1um step 6um_001.nd2:28	45.146	13.5	0	0.5/		28	MAX_V409I_30sec_15min_1um step 6um_001.nd2:28	27.277	13.5	1.218
29	MAX_V409I_30sec_15min_1um step 6um_001.nd2:29	45.494	14	0.696	0.5+		29	MAX_V409I_30sec_15min_1um step 6um_001.nd2:29	29.14	14	3.726
30	MAX_V409I_30sec_15min_1um step 6um_001.nd2:30	45.494	14.5	0			30	MAX_V409I_30sec_15min_1um step 6um_001.nd2:30	29.228	14.5	0.176
31	MAX_V409I_30sec_15min_1um step 6um_001.nd2:31	45.494	15	0	1/		31	MAX_V409I_30sec_15min_1um step 6um_001.nd2:31	30.305	15	2.154	2.5+

## Sheet: V409A (3)
03.09.22
V409A_30sec_15min_1um step 6um_001
Branch point x, y: x=77.86(186), y=116.38(278)
	Label	Length	Time (min)	Rate (um/min)	Frames of growth, retraction, or pause
1	MAX_V409A_30sec_15min_1um step 6um_001.nd2:1	5.783	0
2	MAX_V409A_30sec_15min_1um step 6um_001.nd2:2	6.93	0.5	2.294
3	MAX_V409A_30sec_15min_1um step 6um_001.nd2:3	7.385	1	0.91	1+
4	MAX_V409A_30sec_15min_1um step 6um_001.nd2:4	7.385	1.5	0
5	MAX_V409A_30sec_15min_1um step 6um_001.nd2:5	7.385	2	0
6	MAX_V409A_30sec_15min_1um step 6um_001.nd2:6	7.385	2.5	0	1.5/
7	MAX_V409A_30sec_15min_1um step 6um_001.nd2:7	6.886	3	-0.998	0.5-
8	MAX_V409A_30sec_15min_1um step 6um_001.nd2:8	6.963	3.5	0.154
9	MAX_V409A_30sec_15min_1um step 6um_001.nd2:9	8.237	4	2.548
10	MAX_V409A_30sec_15min_1um step 6um_001.nd2:10	9.43	4.5	2.386
11	MAX_V409A_30sec_15min_1um step 6um_001.nd2:11	11.331	5	3.802	2+
12	MAX_V409A_30sec_15min_1um step 6um_001.nd2:12	11.331	5.5	0	0.5/
13	MAX_V409A_30sec_15min_1um step 6um_001.nd2:13	12.371	6	2.08	0.5+
14	MAX_V409A_30sec_15min_1um step 6um_001.nd2:14	12.371	6.5	0
15	MAX_V409A_30sec_15min_1um step 6um_001.nd2:15	12.371	7	0	1/
16	MAX_V409A_30sec_15min_1um step 6um_001.nd2:16	12.368	7.5	-0.006	0.5-
17	MAX_V409A_30sec_15min_1um step 6um_001.nd2:17	12.891	8	1.046
18	MAX_V409A_30sec_15min_1um step 6um_001.nd2:18	14.229	8.5	2.676	1+
19	MAX_V409A_30sec_15min_1um step 6um_001.nd2:19	14.229	9	0	0.5/
20	MAX_V409A_30sec_15min_1um step 6um_001.nd2:20	13.953	9.5	-0.552	0.5-
21	MAX_V409A_30sec_15min_1um step 6um_001.nd2:21	14.195	10	0.484
22	MAX_V409A_30sec_15min_1um step 6um_001.nd2:22	15.227	10.5	2.064	1+
23	MAX_V409A_30sec_15min_1um step 6um_001.nd2:23	13.365	11	-3.724
24	MAX_V409A_30sec_15min_1um step 6um_001.nd2:24	12.546	11.5	-1.638
25	MAX_V409A_30sec_15min_1um step 6um_001.nd2:25	10.717	12	-3.658	1.5-
26	MAX_V409A_30sec_15min_1um step 6um_001.nd2:26	12.591	12.5	3.748	0.5+
27	MAX_V409A_30sec_15min_1um step 6um_001.nd2:27	12.591	13	0	0.5/
28	MAX_V409A_30sec_15min_1um step 6um_001.nd2:28	12.859	13.5	0.536	0.5+
29	MAX_V409A_30sec_15min_1um step 6um_001.nd2:29	12.189	14	-1.34	0.5-
30	MAX_V409A_30sec_15min_1um step 6um_001.nd2:30	12.189	14.5	0	0.5/
31	MAX_V409A_30sec_15min_1um step 6um_001.nd2:31	12.95	15	1.522	0.5+

## Sheet: Growth rates
WT				V409I				V409A
Image	Rate (um/min)			Image	Rate (um/min)			Image	Rate (um/min)
30sec_15min_0.6um step 6um (03.02.22)	3.788			30sec_15min_1um step 6um_	1.63			30sec_15min_1um step 6um_001	1.87
	1.572				1.914				1.094
	0.512				1.61				6.592
	1.814				1.37				2.278
	2.248				4.71				2.542
	4.244				3.336				1.93
	2.102				3.842				0.598
	3.588				3.77				5.22
	1.99				0.098				0.764
	1.646				0.504				7.868
	2.142				0.046				6.286
	2.778				1.1				2.374
	0.496				0.746				1.104
	0.05				0.758				2.128
	1.014				0.666				0.504
	1.62				0.644				6.69
	2.268				2.22				2.548
	0.72				0.492				2.486
	4.446				2.494				2.41
	2.836				1.37				2.102
	4.442				3.024				2.078
	1.796				0.738				3.2
	3.8				1.27				1.14
	4.724				3.79				0.58
	5.53				1.46				4.112
	0.584				2.572				1.448
	1.114	27			4.082				3.588
30sec_15min_1um step 6um_001	9.68				4.11				5.45
	2.474				0.232				4.24
	1.362				1.276				0.438
	2.688				0.202				3.092
	3.33				1.212				2.328
	1.252				4.564				1.67
	0.492				2.376				2.792
	4.832				2.08				1.072
	1.152				7.728				1.278
	3.896	10			2.364				2.298
WT_30sec_15min_1um step 6um_001	2.502				0.846				1.798
	0.402				3.752				7.38
	1.498				0.624				3.07
	0.074				5.37				1.402
	0.316				2.338				0.598
	4.232				0.374				1.354
	0.98				0.094				2.686
	0.712				0.038				4.806	45
	1.452				1.488	46		V409A_30sec_15min_1um step 6um_	4.496
	3.616			30sec_15min_1um step 6um_002	3.874				5.286
	2.002				5.186				7.018
	1.53				5.108				0.846
	2.04				2.332				2.79
	0.124				1.582				0.328
	2.424				2.282				3.888
	4.01				4.338				4.496
	4.644				5.31				1.834
	1.144				6.036				0.472
	1.726				2.678				2.604
	1.098				3.402				4.432
	2.642				3.374				2.114
	4.96				1.132				6.674
	5.092				4.504				4.004
	4.336				2.282				3.22
	1.984				2.324				5.336
	1.468				3.682				1.536
	1.766				1.242				7.014
	1.884				3.042				1.498
	0.87				2.42				0.092
	0.756				4.018				1.252
	1.8				0.186				4.826
	0.87				3.078				4
	2.208				2.822				0.406
	1.08				5.746				3.866
	1.188				1.992				0.778
	1.306				1.56				1.744
	0.348				1.346				3.884
	1.672				0.97				3.762
	0.764	39			1.35				2.226
WT_30sec_15min_1um step 6um_002	3.112				1.966				2.604
	0.678				3.304				1.122
	1.418				2.118				4.212
	3.832				2.036	34			2.814
	3.582			V409I_30sec_15min_1um step 6um_003	3.818				1.83
	3.676				1.924				1.214
	2.132				1.722				1.114
	2.356				5.214				1.674
	5.198				1.528				0.63
	2.718				4.266				1.508
	4.262				3.188				3.92
	5.244				3.078				6.79
	6.636				0.69				2.306
	5.602				3.22				0.672
	0.232				4.718				0.812
	2.884				4.158				3.708
	4.556				2.954				4.514
	2.592	18			5.03				1.8
WT_30sec_15min_1um step 6um_003	0.31				3.81				2.316
	4.328				3.588				3.892	51
	7.22				1.478			V409A_30sec_15min_1um step 6um_002	1.794
	3.254				1.412				3.116
	6.79				2.556				7.816
	1.746				0.076				2.746
	8.122				3.01				0.606
	3.25				1.88				5.292
	0.644				1.224				5.576
	2.016				3.278				2.084
	5.34				1.748				2.502
	11.992				3.138				0.868
	3.61	13			2.12	27			1.018
				V409I_30sec_15min_1um step 6um_004	1.406				0.75
Count	107				2.452				0.388
					4.4				2.314
					2.652				3.144
					1.108				4.276
					0.78				3.502
					2.738				1.618
					3.206				0.168
					1.466				0.556
					2.124				0.576
					0.51				1.82
					1.456				3.89
					2.762	13			2.896
				V409I_30sec_15min_1um step 6um_001	3.782				3.568
					2.156				0.502
					5.182				3.842
					1.76				3.012
					1.822				5.022
					4.086				2.652
					2.418				1.446	31
					0.508			V409A_30sec_15min_1um step 6um_001	2.294
					2.162				0.91
					3.14				0.154
					1.652				2.548
					0.696				2.386
					1.624				3.802
					3.272				2.08
					0.036				1.046
					2.218				2.676
					3.198				0.484
					1.502				2.064
					0.56				3.748
					3.01				0.536
					1.218				1.522	14
					3.726
					0.176			Count	141
					2.154	24
				Count	144

## Sheet: Pauses
WT				V409I				V409A
Image	Rate (um/min)			Image	Rate (um/min)			Image	Rate (um/min)
30sec_15min_0.6um step 6um (03.02.22)	0			30sec_15min_1um step 6um_	0			30sec_15min_1um step 6um_001	0
	0				0				0
	0				0				0
	0				0				0
	0				0				0
	0				0				0
	0				0				0
	0				0				0
	0				0				0
	0				0				0
	0				0				0
	0				0				0
	0				0				0
	0	14			0				0
30sec_15min_1um step 6um_001	0				0				0
	0				0				0
	0				0	17			0
	0			30sec_15min_1um step 6um_002	0				0
	0				0				0
	0				0				0
	0				0				0
	0				0				0
	0				0				0
	0				0				0
	0				0				0
	0				0				0
	0				0				0
	0				0				0
	0				0				0
	0	16			0				0
WT_30sec_15min_1um step 6um_001	0				0				0
	0				0				0
	0				0				0
	0				0				0
	0				0				0
	0				0				0
	0				0				0
	0				0				0
	0				0				0
	0				0				0
	0				0				0
	0				0				0
	0				0				0
	0				0				0
	0				0				0
	0				0				0
	0				0				0
	0				0				0
	0				0				0
	0				0				0
	0				0				0
	0	22			0				0
WT_30sec_15min_1um step 6um_002	0				0				0	53
	0				0			V409A_30sec_15min_1um step 6um_	0
	0				0				0
	0				0				0
	0				0				0
	0	6			0				0
WT_30sec_15min_1um step 6um_003	0				0				0
	0				0				0
	0				0				0
	0				0				0
	0				0				0
	0	6			0				0
					0				0
					0				0
					0				0
					0				0
					0				0
					0				0
					0				0
					0				0
					0				0
					0				0
					0				0
					0				0
					0				0
					0				0
					0				0
					0				0
					0	64			0
				V409I_30sec_15min_1um step 6um_003	0				0
					0				0
					0				0
					0				0
					0				0
					0				0
					0				0
					0				0
					0				0
					0				0
					0				0
					0				0
					0				0
					0				0
					0				0
					0				0
					0				0
					0				0
					0				0
					0				0
					0				0
					0				0
					0				0
					0				0
					0				0
					0				0
					0				0
					0				0
					0				0
					0				0
					0				0
					0				0
					0				0
					0				0
					0				0
					0				0
					0				0
					0				0
					0				0
					0				0
					0				0
					0				0
					0				0
					0				0
					0				0
					0				0
					0				0
					0	48			0
				V409I_30sec_15min_1um step 6um_004	0				0
					0				0
					0				0
					0				0
					0				0
					0	6			0
				V409I_30sec_15min_1um step 6um_001	0				0
					0				0
					0				0
					0				0
					0				0
					0				0
					0				0
					0				0
					0				0
					0				0
					0				0
					0				0
					0				0
					0				0
					0				0
					0				0
					0				0
					0				0
					0	19			0	101
								V409A_30sec_15min_1um step 6um_002	0
									0
									0
									0
									0
									0
									0
									0
									0
									0
									0
									0
									0
									0
									0
									0
									0
									0
									0
									0
									0
									0
									0	23
								V409A_30sec_15min_1um step 6um_001	0
									0
									0
									0
									0
									0
									0
									0
									0	9

[truncated: 3 more sheets: Retraction rates, Ratios, Durations]
