# Supplementary material for: TUBA1A tubulinopathy mutants disrupt neuron morphogenesis and override XMAP215/Stu2 regulation of microtubule dynamics
Source: eLife. 2022 May 5;11:e76189. doi: 10.7554/eLife.76189 (PMC9236607; doi:10.7554/eLife.76189)
Supplement: Figure 2—source data 3. [file elife-76189-fig2-data3.xlsx]

## Sheet: WT 0h
11.02.20
Image	Cell coordinates	# of neurites	Has neurites? (y/n)	Neurites have retraction bulbs? (y/n)	Proportion of neurites w/ retraction bulbs
WT_0h_1	x=11.47(86), y=10.93(82)	0	n	n/a
	x=41.2(309), y=15.07(113)	0	n	n/a
	x=54.13(406), y=37.6(282)	5	y	n	0
	x=25.07(188), y=47.73(358)	1	y	n	0
	x=7.2(54), y=88.67(665)	2	y	n	0
	x=49.6(372), y=90.67(680)	3	y	n	0
	x=6.93(52), y=113.87(854)	1	y	n	0
WT_0h_2	x=52.27(392), y=8(60)	0	n	n/a
	x=42.53(319), y=41.07(308)	4	y	n	0
WT_0h_3	36.4(273), y=37.07(278)	6	y	n	0
	x=10.67(80), y=35.33(265)	3	y	n	0
WT_0h_4	x=36.67(275), y=20.67(155)	4	y	n	0
	x=25.73(193), y=41.33(310)	5	y	n	0
WT_0h_5	x=37.47(281), y=28(210)	4	y	n	0
WT_0h_6	x=38.27(287), y=26.4(198)	4	y	n	0
WT_0h_7	x=34.8(261), y=33.6(252)	7	y	n	0
	x=34.53(259), y=51.2(384)	3	y	n	0
WT_0h_8	x=78.53(589), y=38(285)	8	y	n	0
WT_0h_9	x=39.07(293), y=30.4(228)	4	y	n	0
WT_0h_10	x=38.4(288), y=40.4(303)	3	y	n	0
	x=36.4(273), y=60.13(451)	4	y	n	0
WT_0h_11	x=49.87(374), y=45.33(340)	5	y	n	0
	x=46.53(349), y=77.47(581)	4	y	n	0
	x=23.07(173), y=93.07(698)	6	y	n	0

## Sheet: WT 2h
11.02.20
Image	Cell coordinates	# of neurites	Has neurites? (y/n)	Neurites have retraction bulbs? (y/n)	Proportion of neurites w/ retraction bulbs
WT_2h_1	x=36.4(273), y=41.6(312)	5	y	y (1)	0.2
	x=13.87(104), y=89.33(670)	5	y	n	0
WT_2h_2	x=32(240), y=34.13(256)	5	y	y (3)	0.6
WT_2h_3	x=77.33(580), y=38.4(580)	4	y	y (2)	0.5
	x=52.4(393), y=94.53(709)	5	y	n	0
WT_2h_4	x=39.6(297), y=57.2(429)	4	y	n	0
WT_2h_5	x=39.73(298), y=65.33(490)	5	y	n	0
WT_2h_6	x=20.67(155), y=32.8(246)	5	y	y (2)	0.4
WT_2h_7	x=21.87(164), y=67.73(508)	2	y	y (1)	0.5
	x=12.53(94), y=131.2(984)	2	y	y (2)	1
WT_2h_8	x=92.4(693), y=27.2(204)	5	y	y (5)	1
	x=22.67(170), y=65.33(490)	4	y	y (2)	0.5
WT_2h_9	x=46.13(346), y=16.27(122)	4	y	y (2)	0.5
	x=60.27(452), y=36.53(274)	0	n	n/a
	x=23.2(174), y=87.6(657)	6	y	y (2)	0.333333
WT_2h_10	x=42.27(317), y=46.27(347)	4	y	y (3)	0.75
	x=37.87(284), y=24.4(183)	3	y	n	0
	x=64.13(481), y=41.47(311)	3	y	y (3)	1
	x=74(555), y=37.33(280)	1	y	n	0
	x=98(735), y=43.6(327)	0	n	n/a
WT_2h_11	x=19.33(145), y=42.67(320)	3	y	y (2)	0.666667
	x=44(330), y=32(240)	4	y	y (4)	1

## Sheet: WT 4h
11.02.20
Image	Cell coordinates	# of neurites	Has neurites? (y/n)	Neurites have retraction bulbs? (y/n)	Proportion of neurites w/ retraction bulbs
WT_4h_1	x=7.07(53), y=29.73(223)	0	n	n/a
	x=24.93(187), y=21.07(158)	0	n	n/a
	x=43.33(325), y=46.13(346)	1	y	n	0
	x=50.8(381), y=61.87(464)	0	n	n/a
WT_4h_2	x=28.27(212), y=20.53(154)	2	y	y (2)	1
	x=34.67(260), y=5.87(44)	1	y	y (1)	1
WT_4h_3	x=20.93(157), y=25.47(191)	1	y	y (1)	1
	x=41.6(312), y=34.53(259)	0	n	n/a
	x=28.8(216), y=6.93(52)	0	n	n/a
	x=51.33(385), y=22.93(172)	0	n	n/a
WT_4h_4	x=34.27(257), y=41.6(312)	3	y	y (3)	1
WT_4h_5	x=38(285), y=21.33(160)	4	y	y (4)	1
	x=75.47(566), y=59.07(443)	0	n	n/a
	x=95.07(713), y=39.87(299)	0	n	n/a
	x=112.67(845), y=16(120)	0	n	n/a
WT_4h_6	x=27.33(205), y=32.27(242)	3	y	y (3)	1
	x=54(405), y=21.07(158)	2	y	y (2)	1
WT_4h_7	x=47.2(354), y=28.4(213)	4	y	y (4)	1
WT_4h_8	x=44.93(337), y=42(315)	2	y	y (2)	1
	x=31.07(233), y=29.2(219)	4	y	y (4)	1
WT_4h_9	x=18.13(136), y=29.73(223)	4	y	y (4)	1
	x=57.2(429), y=37.2(279)	1	y	y (1)	1
	x=63.07(473), y=21.73(163)	2	y	y (2)	1
WT_4h_10	x=54.4(408), y=39.07(293)	3	y	y (3)	1
	x=54.67(410), y=18(135)	0	n	n/a
	x=9.6(72), y=47.2(354)	0	n	n/a
	x=56.13(421), y=55.6(417)	0	n	n/a

## Sheet: WT 6h
11.02.20
Image	Cell coordinates	# of neurites	Has neurites? (y/n)	Neurites have retraction bulbs? (y/n)	Proportion of neurites w/ retraction bulbs
WT_6h_1	x=36.53(274), y=49.73(373)	3	y	y (3)	1
WT_6h_2	x=32.13(241), y=14.67(110)	0	n	n/a
	x=19.33(145), y= 37.73(283)	0	n	n/a
	x=20.67(155), y=46.27(347)	0	n	n/a
	x=45.07(338), y=41.2(309)	0	n	n/a
WT_6h_3	x=43.07(323), y=3.33(25)	0	n	n/a
	x=7.2(54), y=18.13(136)	0	n	n/a
	x=62.27(467), y=20.67(155)	0	n	n/a
	x=4.13(31), y=54.67(410)	0	n	n/a
	x=19.2(144), y=47.74(358)	0	n	n/a
	x=41.07(308), y=54.93(412)	0	n	n/a
WT_6h_4	x=18(135), y=41.47(311)	0	n	n/a
WT_6h_5	x=25.47(191), y=42(315)	1	y	y (1)	1
WT_6h_6	x=14.8(111), y=12.93(97)	0	n	n/a
	x=41.07(308), y=28.13(211)	0	n	n/a
	x=51.6(387), y=27.07(203)	0	n	n/a
WT_6h_7	x=55.2(414), y=11.2(84)	0	n	n/a
	x=20.53(154), y=46.67(350)	0	n	n/a
	x=31.87(239), y=54(405)	0	n	n/a
WT_6h_8	x=51.87(389), y=25.47(191)	2	y	y (2)	1
	x=11.73(88), y=46.67(350)	0	n	n/a
	x=22.4(168), y=51.2(384)	0	n	n/a
WT_6h_9	x=23.2(174), y=15.87(119)	1	y	y (1)	1
	x=49.6(372), y=58(435)	0	n	n/a
WT_6h_10	x=11.87(89), y=40.8(306)	1	y	n	0

## Sheet: V409I 0h
11.02.20
Image	Cell coordinates	# of neurites	Has neurites? (y/n)	Neurites have retraction bulbs? (y/n)	Proportion of neurites w/ retraction bulbs
VI_0h_1	x=47.33(355), y=34(255)	6	y	n	0
	x=20.93(157), y=49.6(372)	5	y	n	0
VI_0h_2	x=38(285), y=62.13(466)	5	y	n	0
VI_0h_3	x=37.33(280), y=32.27(242)	5	y	n	0
VI_0h_4	x=58.27(437), y=25.6(192)	4	y	n	0
	x=58.13(436), y=38.13(286)	3	y	n	0
	x=88.93(667), y=39.6(297)	5	y	n	0
	x=101.6(762), y=13.6(102)	2	y	n	0
VI_0h_5	x=38.27(287), y=28.67(215)	6	y	n	0
VI_0h_6	x=43.33(325), y=24.4(183)	5	y	n	0
	x=51.6(387), y=55.47(416)	4	y	n	0
	x=87.6(657), y=46.53(349)	5	y	n	0
VI_0h_7	x=38.93(292), y=55.73(418)	4	y	n	0
	x=54.13(406), y=106.93(802)	2	y	n	0
VI_0h_8	x=33.47(251), y=54.13(406)	5	y	n	0
VI_0h_9	x=37.47(281), y=40(300)	6	y	n	0
VI_0h_10	x=37.33(280), y=33.47(251)	6	y	n	0
VI_0h_11	x=48.93(367), y=25.87(194)	4	y	n	0
	x=41.33(310), y=56.13(421)	6	y	n	0
	x=74(555), y=44.27(332)	4	y	n	0

## Sheet: V409I 2h
11.02.20
Image	Cell coordinates	# of neurites	Has neurites? (y/n)	Neurites have retraction bulbs? (y/n)	Proportion of neurites w/ retraction bulbs
VI_2h_1	x=45.07(338), y=91.33(685)	2	y	n	0
	x=72(540), y=65.2(489)	2	y	y (1)	0.5
VI_2h_2	x=39.73(298), y=35.2(264)	3	y	n	0
VI_2h_3	x=33.87(254), y=33.6(252)	4	y	n	0
VI_2h_4	x=64(480), y=38.27(287)	5	y	n	0
VI_2h_5	x=35.73(268), y=62.4(468)	5	y	n	0
VI_2h_6	x=46.67(350), y=52.93(397)	5	y	n	0
	x=40.27(302), y=93.47(701)	5	y	n	0
VI_2h_7	x=28.4(213), y=53.47(401)	6	y	n	0
VI_2h_8	x=50.27(377), y=33.6(252)	5	y	n	0
VI_2h_9	x=35.33(265), y=33.87(254)	6	y	y (1)	0.166667
VI_2h_10	x=39.87(299), y=35.87(269)	6	y	n	0
VI_2h_11	x=58.93(442), y=43.73(328)	4	y	n	0
	x=102.13(766), y=33.73(253)	2	y	n	0

## Sheet: V409I 4h
11.02.20
Image	Cell coordinates	# of neurites	Has neurites? (y/n)	Neurites have retraction bulbs? (y/n)	Proportion of neurites w/ retraction bulbs
VI_4h_1	x=34.4(258), y=21.6(162)	3	y	y (2)	0.666667
VI_4h_2	x=48(360), y=7.33(55)	0	n	n/a
	x=10.4(78), y=50.13(376)	0	n	n/a
VI_4h_3	x=28.4(213), y=37.6(282)	2	y	y	0
VI_4h_4	x=21.73(163), y=32.67(245)	4	y	y (4)	1
VI_4h_5	x=38.8(291), y=35.47(266)	4	y	y (3)	0.75
VI_4h_6	x=63.73(478), y=32.27(242)	6	y	n	0
VI_4h_7	x=42.4(318), y=34.27(257)	4	y	y (2)	0.5
VI_4h_8	x=28.53(214), y=27.73(208)	5	y	y (2)	0.4
VI_4h_9	x=38.53(289), y=36.93(277)	5	y	y (4)	0.8
	x=51.07(383), y=21.73(163)	3	y	y (1)	0.333333
VI_4h_10	x=52.13(391), y=24(180)	5	y	y (1)	0.2
	x=65.6(492), y=44.27(332)	4	y	n	0
	x=88.53(664), y=49.47(371)	5	y	y (2)	0.4

## Sheet: V409I 6h
11.02.20
Image	Cell coordinates	# of neurites	Has neurites? (y/n)	Neurites have retraction bulbs? (y/n)	Proportion of neurites w/ retraction bulbs
VI_6h_1	x=48(360), y=47.87(359)	2	y	y (2)	1
	x=52.13(391), y=36.27(272)	1	y	y (1)	1
	x=36(270), y=22(165)	0	n	n/a
	x=27.33(205), y=16.53(124)	0	n	n/a
VI_6h_2	x=11.6(87), y=18.53(139)	0	n	n/a
	x=5.2(39), y=22.13(166)	0	n	n/a
VI_6h_3	x=18.4(138), y=50.8(381)	2	y	y (1)	0.5
	x=38.67(290), y=13.2(99)	0	n	n/a
	x=58.8(441), y=26.93(202)	0	n	n/a
VI_6h_4	x=56.53(424), y=10(75)	0	n	n/a
VI_6h_5	x=28.53(214), y=49.87(374)	1	y	y (1)	1
	x=41.87(314), y=18.93(142)	1	y	y (1)	1
VI_6h_6	x=27.6(207), y=30.53(229)	0	n	n/a
	x=54.67(410), y=37.07(278)	2	y	y (1)	0.5
VI_6h_7	x=36.4(273), y=36.13(271)	2	y	y (2)	1
VI_6h_8	x=30.67(230), y=31.6(237)	5	y	y (5)	1
VI_6h_9	x=39.73(298), y=31.33(235)	3	y	y (3)	1
VI_6h_10	x=37.33(280), y=35.87(269)	1	y	y (1)	1

## Sheet: V409A 0h
11.02.20
Image	Cell coordinates	# of neurites	Has neurites? (y/n)	Neurites have retraction bulbs? (y/n)	Proportion of neurites w/ retraction bulbs
VA_0h_1	x=34.93(262), y=37.2(279)	4	y	n	0
VA_0h_2	x=18.13(136), y=39.87(299)	5	y	n	0
	x=33.73(253), y=9.73(73)	2	y	n	0
	x=51.73(388), y=12.4(93)	5	y	n	0
VA_0h_3	x=35.87(269), y=98.93(742)	4	y	n	0
	x=41.73(313), y=26.13(196)	4	y	n	0
VA_0h_4	x=36.27(272), y=38.27(287)	6	y	n	0
VA_0h_5	x=24.93(187), y=39.33(295)	7	y	n	0
VA_0h_6	x=13.07(98), y=51.47(386)	2	y	n	0
	x=86(645), y=14.8(111)	5	y	n	0
VA_0h_7	x=37.33(280), y=34.8(261)	5	y	n	0
VA_0h_8	x=53.33(400), y=66.4(498)	4	y	n	0
	x=16.27(122), y=24.27(182)	6	y	n	0
	x=40.8(306), y=94.13(706)	3	y	n	0
VA_0h_9	x=28(210), y=22(165)	5	y	n	0
	x=45.33(340), y=101.07(758)	3	y	n	0
	x=83.2(624), y=100(750)	4	y	n	0
	x=90.4(678), y=81.87(614)	3	y	n	0
VA_0h_10	x=27.2(204), y=34.53(259)	6	y	n	0
	x=39.6(297), y=54.13(406)	2	y	n	0
VA_0h_11	x=24.27(182), y=47.33(355)	4	y	n	0
	x=107.6(807), y=24(180)	5	y	n	0

## Sheet: V409A 2h
11.02.20
Image	Cell coordinates	# of neurites	Has neurites? (y/n)	Neurites have retraction bulbs? (y/n)	Proportion of neurites w/ retraction bulbs
VA_2h_1	x=36.13(271), y=9.73(73)	5	y	n	0
	x=29.47(221), y=33.33(250)	4	y	n	0
	x=46.53(349), y=51.07(383)	3	y	n	0
VA_2h_2	x=36(270), y=31.6(237)	4	y	n	0
VA_2h_3	x=48.93(367), y=20.27(152)	5	y	n	0
VA_2h_4	x=15.6(117), y=43.6(327)	1	y	n	0
	x=48.4(363), y=35.47(266)	4	y	n	0
VA_2h_5	x=36.67(275), y=31.47(236)	6	y	n	0
VA_2h_6	x=28.13(211), y=21.6(162)	4	y	y (1)	0.25
VA_2h_7	x=39.47(296), y=33.6(252)	4	y	n	0
	x=92.53(694), y=25.33(190)	5	y	n	0
VA_2h_8	x=34.67(260), y=27.47(206)	6	y	n	0
VA_2h_9	x=66.8(501), y=35.87(269)	7	y	n	0
VA_2h_10	x=84.4(633), y=28.4(213)	7	y	n	0
VA_2h_11	x=46.53(349), y=60.8(456)	3	y	y (1)	0.333333

[truncated: 14 more sheets: V409A 4h, V409A 6h, WT 0h (2), WT 2h (2), WT 4h (2), WT 6h (2), V409I 0h (2), V409I 2h (2), V409I 4h (2), V409I 6h (2), V409A 0h (2), V409A 2h (2), V409A 4h (2), V409A 6h (2)]
