# Supplementary material for: TUBA1A tubulinopathy mutants disrupt neuron morphogenesis and override XMAP215/Stu2 regulation of microtubule dynamics
Source: eLife. 2022 May 5;11:e76189. doi: 10.7554/eLife.76189 (PMC9236607; doi:10.7554/eLife.76189)
Supplement: Figure 3—source data 2. [file elife-76189-fig3-data2.xlsx]

## Sheet: Polymerization WT
03.02.22							03.09.22									03.23.22
#3	#4	#5	#6		Average		#4	#5	#6	#7	#8	#9		Average		#2	#3	#4	#5	#6	#7	#8	#9	#10		Average
4.9005	3.24942	2.88599	3.66829		4.82955		3.37072	6.52856	5.62169	4.64815	8.12304	2.79337		5.40093		5.39131	4.10364	7.29915	3.02285	4.69509	4.39451	6.19686	4.64379	5.10082		5.22666
2.72773	3.29043	7.05169	3.76178				5.12911	8.06291	6.31094	6.51915	11.7966	6.0762				3.71519	3.34228	5.90689	6.75489	2.739	4.81619	3.57972	9.86617	3.62904
4.00058	6.3713	7.19418	6.589				7.66391	8.49066	3.12758	5.26076	2.48097	6.33507				5.34991	5.66	5.2747	3.16304	2.80759	4.67778	3.39794	10.238	2.83847
3.76978	4.75513	3.60873	8.01745				8.23139	5.30314	4.82057	5.72284	3.0524	9.0806				1.76977	4.25129	3.11979	4.12269	2.22195	7.62936	2.72499	8.88693	6.38508
3.15928	2.73491	6.77032	7.65807				4.30796	7.85592	7.39443	4.705	3.07746	3.80073				2.87708	2.0322	5.57715	4.24909	2.1295	4.62322	8.4897	5.92104	8.06922
3.25326	6.56312	5.92106	7.17537				7.08778	5.63714	3.69527	3.48675	2.85997	2.70266				4.27438	3.08625	4.78036	5.5998	7.6695	1.9894	2.8876	4.2599	4.30912
4.96297	5.2554	4.34196	4.93819				19.1821	4.48681	7.29708	4.25335	4.66566	8.17844				6.71028	5.05134	2.11938	4.84737	6.55605	4.00344	2.5644	3.80586	10.1779
3.78662	4.73852	4.07725	4.56072				5.3862	3.89424	8.46896	1.10551	9.95568	7.93159				2.94072	5.92331	14.3447	4.30039	1.90761	12.2919	3.81089	17.5659	2.8596
2.5402	7.43158	4.85277	3.60082				1.7182	3.87358	5.934	5.90846	4.76701	2.64577				4.25943	5.24913	6.74642	5.24098	3.13049	2.56254	2.54331	6.04724	5.75674
4.14759	6.0058	2.8852	2.58723				3.83448	2.94923	5.23605	4.70311	4.1094	4.26402				5.05466	1.84697	3.12519	5.09423	2.83579	19.8194	3.55442	2.58717	6.13495
2.4525	5.54845	7.84402	1.77165				2.42623	3.88566	3.31955	17.4587	4.23316	5.69532				2.20888	3.78556	10.7982	6.53791	3.88132	3.89286	4.42368	3.87838	5.94278
1.82694	5.76551	2.70871	3.29451				2.91981	5.67254	4.57271	2.89958	14.7958	10.3673				7.86802	11.2592	6.28704	6.31961	4.67184	5.91066	6.54159	2.87793	5.86747
5.3355	4.18292	4.06612	2.70584				2.27619	6.30536	3.4166	5.55961	4.5127	10.4594				3.58552	3.94915	4.25044	2.96863	7.06345	8.77594	1.59162	6.45263	2.47807
3.86808	4.06837	4.65009	1.32697				2.57687	3.82314	10.1269	7.20106	2.03512	3.7899				6.60365	2.80367	3.10707	4.15617	9.00263	12.769	6.73035	3.34416	7.96247
1.9869	3.69561	2.51926	16.317				1.9062	4.6533	5.86997	5.2566	3.94363	3.58523				5.54595	3.23704	2.41796	3.08495	2.05394	4.73418	10.5951	12.9465	2.91166
5.45234	5.10338	2.71796	3.19581				3.36923	7.54675	18.6928	2.35406	5.59257	2.99224				4.77203	2.93611	10.6111	6.17776	15.9007	9.60184	4.68678	3.68906	4.46863
6.15728	1.50567	3.84429	6.50127				2.12441	5.47581	5.30351	2.58613	7.23374	2.4128				22.6939	3.6858	4.10214	3.46188	3.78548	4.00333	2.97342	12.1755	11.2594
5.55565	5.34413	7.79713	3.44472				3.08576	7.14158	4.31327	2.37305	3.99344	2.43701				7.0933	4.01523	5.87276	3.0739	2.54441	4.19811	4.43976	6.33678	9.90809
1.43699	4.16537	3.5084	6.7882				10.076	7.23081	3.32341	5.36499	3.02873	5.80993				4.09606	3.6867	11.1585	4.63572	10.7405	4.23079	6.75197	5.18012	4.50627
5.18015	1.00559	2.95034	3.742				9.79912	4.99393	18.4648	6.72042	3.63916	6.10247				3.09766	5.39693	1.44533	2.51792	2.91879	6.32174	5.37235	1.69498	6.67942
2.37385	4.23952	2.67311	8.39506				9.59177	4.71545	14.6121	7.03184	3.71267	7.28589				6.35298	8.82729	6.96036	2.49273	3.23402	2.91612	6.71154	5.8015	6.3622
2.40761	5.99792	1.73741	3.37318				4.59707	3.40289	5.20588	4.37113	4.35124	4.60582				4.79306	2.7468	6.16927	4.61075	3.18852	9.75238	3.90525	5.42015	5.6309
3.2876	5.78197	2.99763	10.8148				1.62854	3.87773	9.36076	8.56437	4.70806	10.6706				2.47033	10.0644	6.14228	3.38009	2.78158	6.74804	1.42968	5.07878	3.88528
1.67679	6.41673	5.67429	3.20682				2.87804	2.21927	3.53785	4.11761	5.42038	2.86694				3.40136	3.45816	8.14774	2.79441	2.43784	19.2234	5.08705	3.79625	3.93884
4.36101	6.76471	0.775314	3.73696				9.31795	4.38099	3.65837	5.57696	3.14115	2.51922				4.45785	16.1433	3.06793	4.35078	5.16662	4.4845	4.28905	4.44166	2.13745
9.11482	5.18365	5.70264	2.05732				1.87771	6.24578	4.9704	3.74834	5.13987	4.66465				2.07793	3.79045	2.90217	2.50814	2.70675	0.645236	17.3499	5.13104	12.9243
4.70999	3.52024	1.91175	14.6973				5.41927	5.68176	9.27423	3.00663	4.37497	2.53308				1.9422	30.4999	3.75341	4.47536	3.30004	5.81784	5.45482	9.39992	7.90685
12.2072	6.61609	5.28626	6.87197				2.71424	6.02235	7.28094	4.7689	8.44916	2.56631				1.2964	2.83416	3.25556	4.66961	3.29198	3.36784	5.4053	6.57359	12.686
5.48278	3.80425	4.78722	4.1107				6.93706	7.57171	2.30123	3.65799	4.88317	6.64735				3.04515	3.31733	8.01262	5.6093	9.2825	4.97852	5.64141	2.8981	7.85142
4.93797	7.23122	4.93783	3.74766				4.905	5.19813	1.38766	4.33583	4.84142	1.53941				4.51643	11.1315	5.30964	3.65618	6.46514	3.54703	5.50624	7.06354	13.7956
4.95381	1.81944	4.39084	14.9004				4.56462	5.75344	4.65558	3.93473	4.83085	3.88248				1.81095	6.41964	6.57937	3.88927	5.95979	3.81199	5.17443	4.32037	5.85957
3.92998	2.40816	2.99146	4.48836				6.96834	2.8608	14.6604	6.96283	2.05088	2.58762				3.43938	11.9876	6.59331	4.23953	5.52768	9.73742	3.19871	3.43175	4.72959
2.46065	1.09284	7.49773	2.39613				2.45333	3.59258	2.81326	4.45938	6.22375	3.41445				2.94998	4.45596	2.58093	6.12878	2.79022	3.29436	6.97203	7.12758	14.2132
2.6204	1.54997	2.67913	4.61085				10.0584	5.21894	6.27915	16.8622	2.56833	3.98528				8.82115	6.90198	7.46479	5.76591	3.96154	12.6919	4.76074	4.49907	5.2911
6.87197	3.38094	2.48237	1.57003				1.8583	3.63074	3.20225	3.27238	2.62608	4.28557				0.740569	5.49796	6.54419	3.87603	5.54573	10.8843	10.3411	5.22908	3.88309
2.76982	29.146	3.91732	2.50425				4.11452	7.38415	3.95215	2.57455	6.88827	3.53303				7.15628	4.66967	4.77667	4.91753	2.26711	4.82509	5.35012	15.7479	4.63611
4.43786	12.3453	9.07	4.3582				0.591139	11.3237	3.12639	4.27056	3.83753	5.67977				2.02394	6.74713	8.19317	2.85734	4.42313	3.47858	7.29061	10.7819	5.41642
3.16514	3.23763	4.99801	2.96664				3.58616	1.74682	5.63103	6.1415	7.74454	4.25583				2.97572	4.25827	3.97166	2.8981	2.84247	4.31081	3.94457	1.00397	3.39915
2.78077	3.35879	4.52766	4.06422				4.11787	11.0634	5.66957	4.00424	3.05829	6.1235				4.32637	4.31122	7.61297	6.80706	20.1526	15.2453	10.1887	15.0597	6.38698
3.18005	7.53776	7.79825	2.89523				3.69217	2.27919	7.9293	22.4117	4.22928	12.0434				2.25844	5.02721	1.93287	3.00364	5.26785	4.74973	3.02983	25.6431	4.80741
1.65119	3.29006	5.75819	2.67429				2.86605	6.34077	5.24761	21.9312	3.59392	3.5216				4.35464	6.26302	4.70318	6.38004	6.27608	4.33255	4.26495	1.5937	2.99122
3.3734	2.88083	5.53037	6.24942				3.41414	7.04283	10.036	4.41163	5.54072	2.72925				3.49763	7.57593	3.04236	4.6492	2.22656	3.96187	9.07565	4.47156	2.19163
4.27251	7.06866	2.56198	3.02143				4.54194	3.55921	4.73419	4.41711	3.93041	4.10627				3.52063	4.19324	9.58088	3.3121	3.06612	7.19512	4.74193	7.18084	4.69347
20.4396	3.60628	8.21075	2.94557				9.81055	5.1148	6.00668	4.19769	1.88391	2.25328				3.80756	3.42866	2.72184	7.0477	16.5166	11.8863	3.65243	3.23421	5.20219
5.51861	2.09609	2.36698	16.0992				12.1685	11.4062	4.27873	3.17373	7.22145	7.35497				4.46113	3.73521	4.14234	1.72933	2.651	2.99913	3.37459	5.46382	2.15332
1.08393	5.236	6.30934	10.8766				1.78446	4.91931	11.1253	6.75621	9.67072	8.08448				3.28887	4.12867	3.80516	3.97199	3.23073	2.45832	11.0805	8.63586	8.00089
5.41633	4.88109	2.64688	16.1182				12.9667	1.80711	5.02046	4.16953	6.21814	10.7788				7.75168	15.9806	4.67979	3.3059	3.64663	0.887637	9.88064	4.38865	5.96387
9.84246	3.98256	3.26867	5.36464				2.65198	7.92834	6.60522	4.29994	5.46505	20.6122				2.79117	2.77776	7.79632	2.3497	2.46996	3.71565	7.21564	5.1299	3.46549
3.1771	7.27757	3.54278	5.87125				3.05039	6.32818	5.06693	7.84403	11.2093	5.71451				4.66675	7.80796	5.52401	5.32698	5.585	5.35596	5.35329	3.21639	14.1305
7.07077	2.49675	5.35457	1.06692				2.89415	3.35859	2.64504	5.48695	5.89328	1.66285				10.4218	22.2731	5.37771	7.79576	6.40745	2.38878	4.25062	3.75939	13.7106
1.92562	4.15389	3.5159	20.9092				5.18699	2.89417	1.31686	5.1058	1.7827	18.3742				2.95857	5.29102	6.62391	5.01391	3.59842	2.26765	8.81721	8.30003	8.51637
3.97394	2.31255	6.3145	3.13206				5.60103	2.55432	5.32534	3.6887	4.13917	3.52638				5.03867	4.22847	4.25351	3.37355	5.73368	14.6262	9.24535	7.11452	6.31143
3.7931	12.7552	4.49855	2.98906				6.30162	3.72524	5.54033	6.64544	4.72896	10.3189				4.16974	5.04636	4.12597	8.62813	3.83123	6.5736	2.62382	4.08678	1.48605
4.15972	5.07279	10.0186	5.07073				4.29931	7.17582	5.68319	11.6242	4.70145	3.56545				2.50303	7.11325	4.44815	6.11694	4.43333	6.80069	4.45592	7.10953	3.13718
5.33526	1.4795	9.27721	3.68202				3.14898	9.00498	5.82857	3.82706	3.5415	7.29952				2.83284	3.24878	7.12623	5.20049	2.8102	7.62439	2.7298	1.70596	22.2632
2.47367	9.16977	6.52455	4.18276				1.57882	3.54257	2.21023	2.44801	2.95494	5.49253				6.51961	4.50787	7.89372	5.61042	5.38058	2.32823	3.89441	4.20756	4.79136
2.68637	10.285	3.14081	12.8579				4.5228	3.51661	6.18934	1.76323	7.31958	4.23118				3.01837	2.05716	2.68789	5.17738	4.67927	3.76743	3.25782	6.39001	12.3376
3.45288	1.55761	6.19083	9.3467				3.51264	7.02684	4.68445	5.77253	3.71457	3.54637				3.16256	2.96016	6.0755	2.36983	2.33438	9.05371	4.1847	6.75742	6.83458
3.77744	3.88122	6.4244	7.39364				4.55196	5.79658	4.8394	3.22726	3.64446	10.3498				6.53625	7.82567	3.6876	6.8191	2.334	7.37119	13.3882	5.00196	6.78458
1.75444	3.74198	2.1527	14.2014				2.89276	8.23571	10.031	7.72157	4.89257	4.56869				5.71215	2.6948	8.69537	9.02863	5.70086	3.2223	2.73835	5.86602	5.79399
1.62189	5.41281	5.02049	6.5976				4.53126	2.98934	9.71848	10.5205	4.64304	3.81969				6.26981	4.09698	1.65252	6.456	11.5392	3.89256	3.87223	4.30241	13.5418
3.00164	4.93243	5.62228	1.46737				3.52332	11.3393	8.91014	10.1822	1.92885	2.15348				5.47085	2.42371	2.58177	5.52426	5.09346	5.34653	7.22481	9.85456	21.5556
2.86504	3.65948	3.15817	12.4316				4.33231	4.46171	3.79725	4.26536	4.52754	5.39073				6.08499	4.56502	6.56101	3.07956	4.15979	10.2055	6.61362	3.32509	3.14468
4.32905	2.88234	4.96983	3.72938				2.43256	16.157	1.37231	3.72389	4.05911	5.75123				5.88068	2.9684	4.24088	6.35154	1.40529	3.07624	4.09917	5.26448	3.64714
4.42266	3.10025	4.72746	3.0828				2.62749	10.2295	7.35423	7.58089	2.68428	3.19078				2.30513	3.13715	3.48961	2.66142	8.17919	1.89372	4.29441	2.68489	5.47248
3.12341	2.87584	3.33803	8.7335				10.0692	1.48299	4.71614	5.74017	5.43671	2.9429				11.2893	5.10043	4.74059	7.76167	10.5695	4.8631	4.20685	1.93961	5.39822
1.73855	4.00774	4.45625	4.98797				3.61683	0.910792	4.92577	4.94635	11.2833	6.82087				4.93805	2.91788	3.07611	4.41886	3.00382	7.34308	6.53062	9.69938	8.24837
5.08593	3.47285	5.83906	2.56663				6.40537	4.4816	3.5072	2.77114	18.8225	3.29113				6.94827	3.2127	2.99477	11.4351	2.41919	5.2669	4.20426	8.84395	4.27897
4.72458	2.51215	6.99811	3.64084				12.292	8.12459	3.3833	2.93911	35.2469	3.04981				3.62031	5.42167	5.04576	4.14115	4.51132	2.5714	7.52294	5.16815	6.22191
9.5883	7.25946	7.77624	7.0177				1.76036	4.9462	8.46744	3.11421	4.03677	1.11753				4.81004	10.459	1.59869	3.53811	3.60855	3.12816	4.00615	2.32394	10.6962
6.38516	4.93651	5.2817	3.88228				9.45611	3.27338	4.61891	5.57535	5.33745	6.17967				2.03777	14.1931	3.71859	4.0756	0.818127	16.9019	4.15299	20.5308	8.63695
5.97264	4.76699	1.75999	4.76247				17.2932	6.32664	5.53717	5.13209	4.22779	3.42133				6.43957	2.80829	4.32735	3.62456	2.34082	6.01703	6.48209	11.7984	3.98915
4.95774	5.00785	6.35738	4.07277				3.28201	4.53442	12.4656	3.12468	6.0494	3.34098				2.19425	5.19093	4.78779	3.03379	4.41022	6.2379	5.33454	4.50086	6.8801
6.60657	4.05208	2.24527	3.81064				3.40074	12.5181	3.32579	10.5115	5.68474	7.20086				1.66512	4.82259	5.35633	4.93483	4.1649	4.58976	4.60898	2.0643	15.1037
1.51446	10.7443	5.30732	4.83831				9.77783	4.95487	5.92538	4.02158	10.8069	5.11749				2.06586	4.00563	4.85002	7.85197	1.82752	7.46163	4.79811	6.02319	3.67465
34.349	10.5597	6.24379	5.66872				6.27299	3.05163	4.9587	3.47302	6.58581	4.65261				1.69097	2.92203	5.16579	4.46632	1.39492	5.98913	2.23583	4.49861	7.88621
2.50431	7.23051	3.36909	8.78057				3.23607	5.21207	5.24477	3.2617	3.12099	2.68912				3.37019	3.70892	7.2308	4.46656	5.82644	12.2553	6.37645	4.03733	5.18765
3.47695	7.7918	2.95045	4.80052				1.71993	5.39192	10.4535	3.28737	10.4816	6.07529				3.0026	3.27248	6.75398	2.32926	1.2263	3.0833	5.26959	3.11559	12.4968
1.7504	1.99633	6.20237	7.42262				9.33172	17.4268	5.74771	6.13637	10.7122	4.30353				3.78801	2.48514	4.29154	1.98635	2.26618	10.8889	8.36949	3.97171	3.23016
2.66732	3.25725	4.76304	5.19349				5.37883	7.5548	1.44572	4.25421	10.3587	4.52419				5.03612	3.61738	8.84096	4.02738	3.64162	4.39958	7.59326	4.04171	3.40142
3.21788	4.74944	3.69339	6.30336				4.52154	8.69839	4.3577	8.68243	8.99349	9.23075				3.24244	2.4254	4.20925	1.90149	6.54644	3.81197	6.64901	3.49531	4.57327
4.76967	3.66918	4.37699	1.71662				2.50618	4.76396	3.13994	2.81569	2.57779	7.01108				3.78635	5.11118	3.24436	4.09598	4.6726	3.40321	5.78184	5.05019	6.66426
3.52909	3.08432	6.19612	2.79431				2.18583	7.6774	3.90622	4.8498	5.0622	3.84609				3.3925	2.83496	4.97434	20.5499	3.49635	3.58502	3.10509	1.93361	3.51787
4.81471	3.56345	4.83273	2.29072				3.39424	3.84093	1.99429	3.84559	4.17777	6.38914				2.74533	4.98251	13.972	2.77758	3.36359	9.63669	4.33851	5.52017	9.14386
4.02061	4.43109	5.83956	6.66793				5.09655	2.1074	4.40561	7.02222	13.9081	5.33314				4.29421	29.7935	4.5995	4.54097	3.91441	7.72018	3.50187	3.82234	4.50509
2.42791	3.61257	7.08719	5.8938				1.83488	5.69073	5.4167	4.7319	5.90958	2.39799				4.75771	4.2502	3.06475	1.94236	2.27602	5.98346	1.81937	5.08671	3.39718
5.74901	5.51601	3.6963	2.92535				6.76498	5.50087	16.0244	5.84605	4.14113	4.28597				2.79179	4.50017	1.73333	3.45968	1.90818	4.14965	6.8084	5.3404	5.47422
5.55544	5.97656	3.05535	3.45265				3.47856	9.30591	6.3925	3.49453	4.27874	1.7234				6.70436	4.75727	4.43614	16.4361	12.7999	3.03616	11.754	3.61352	7.86839
5.11495	2.01338	6.39576	3.48563				5.74842	2.60016	3.07848	4.8927	2.81222	3.80458				4.40141	7.15957	4.34315	3.23859	9.58672	13.5189	5.89014	3.30612	2.49114
4.83509	4.8927	5.13561	2.43458				4.10899	4.14591	5.00507	4.19389	4.12001	30.8948				8.47928	5.25601	6.20254	3.40627	3.30153	5.77967	6.0644	7.91885	4.96953
2.95357	3.18928	3.78863	5.07386				3.143	6.46169	2.89655	7.88171	4.88298	6.53449				1.61367	4.64467	2.0457	4.01408	1.75163	3.02138	5.39361	6.68187	7.7726
5.40883	8.5829	3.75362	2.82621				3.18821	3.52775	5.32646	2.66719	4.78963	4.26719				3.6379	4.62636	6.00113	2.51453	3.53815	4.46476	22.0198	2.60561	4.95396
3.6339	6.03947	6.63416	2.15363				3.29173	6.28155	6.21502	3.30973	20.9053	2.73823				3.50977	2.42864	4.68672	2.73044	4.6521	1.36295	2.80137	5.13255	1.95092
4.14364	3.67884	7.60762	3.20787				1.84991	5.01984	3.94631	2.757	5.01297	1.21156				3.63302	2.45615	1.72433	2.29284	4.01843	10.3589	5.92586	7.10003	1.73183
2.31676	17.3451	4.26564	2.92825				7.11827	5.79702	5.28055	4.48872	9.40429	13.8031				4.18815	2.09267	3.67373	7.00185	4.51561	5.57159	2.15023	5.04896	4.45485
4.6263	11.5651	5.01519	12.9704				4.68054	4.11332	3.65525	2.87851	11.3128	3.68007				2.91066	2.88538	3.3553	4.04087	4.85113	6.50162	7.54226	4.33234	2.95509
4.82275	1.67301	5.11837	3.74494				4.479	3.29425	3.16982	2.62246	7.71337	3.75554				4.26504	10.7616	6.08855	2.72902	2.06664	6.04511	3.57327	4.83457	3.99173
4.01746	2.59511	0.957277	2.45563				5.76101	5.28152	5.27376	3.45555	2.95316	4.64424				3.29358	3.79092	1.54194	4.71454	3.87506	5.41062	4.2651	6.23809	3.70574
2.6665	0.987797	6.86265	4.97169				4.24199	7.00524	1.49587	2.78549	12.9247	8.79157				3.03765	2.12598	5.71983	4.61947	2.97788	8.40111	10.1941	3.46532	3.19172
19.3019	4.34535	4.17645	3.49501				2.71463	3.27694	3.98022	3.28609	10.894	3.80557				3.12482	2.12432	8.26205	3.51148	4.63199	5.00593	3.87503	3.79376	2.98718
1.18914	4.47763	3.90471	2.36681				11.2611	8.00224	1.53139	6.14641	2.18833	3.3826				2.88079	2.96642	4.00297	3.15123	4.79679	3.40648	3.23756	4.1084	7.77017
3.20311	5.31768	1.74229	5.07763				0.895029	3.23962	4.47152	3.48381	3.16751	14.3024				4.21948	7.06338	2.92007	5.41509	7.86427	3.06143	1.77955	7.30564	6.42083
3.94484	4.53202	2.08888	3.01955				9.63322	3.7465	0.832254	5.84608	4.77772	12.0171				5.645	3.36338	2.60427	2.02783	4.70616	6.88315	12.9503	7.4452	1.527
4.22998	4.3417	3.16299	4.74405				3.84851	3.76892	12.8872	4.10401	4.21469	3.17259				3.16835	3.72847	3.14764	3.74469	3.43161	4.66645	2.08655	4.23399	7.79989
3.22141	4.7721	12.0176	6.14357				3.04424	4.28793	6.8135	2.45571	4.30535	3.14325				10.9747	3.96317	3.43929	3.79787	4.04649	4.18889	3.93907	3.95899	11.2012
2.64542	3.3147	1.1799	7.35806				4.77196	3.5055	4.03072	6.20399	7.57272	4.23996				2.78421	7.77123	2.29047	2.08822	6.26217	6.7249	3.80302	4.05212	6.08968
2.644	4.75368	2.72968	5.14403				33.3913	4.32511	7.48304	3.78379	4.76095	8.0841				5.38149	2.55885	4.37105	3.52951	7.772	8.07779	3.88593	3.49028	3.90585
4.11842	3.81497	3.94955	3.33091				2.7597	3.88737	7.96214	4.23019	6.00086	5.03991				7.86697	3.96797	3.70607	5.03261	10.476	6.40518	2.85339	2.72923	3.79931
1.67076	2.61903	3.4076	3.68698				2.66131	3.73531	10.7545	5.21162	2.87047	3.11176				1.62448	4.92639	3.90237	5.01263	4.28905	3.59159	2.67351	4.55319	4.07883
3.60968	14.8109	5.62389	2.54955				2.28487	3.05999	2.44397	6.13366	3.08813	12.7899				5.18419	3.66152	5.91667	3.13205	4.20203	2.88337	8.23341	4.16289	3.23831
2.96016	2.40312	6.86976	6.43602				2.95679	4.16694	5.46525	7.37069	4.8735	3.18314				4.43004	6.29136	4.80576	3.66421	1.27892	2.26297	4.19426	8.37268	5.82795
1.7329	5.22399	5.62805	13.0149				3.33267	4.2625	4.51916	2.46547	7.25652	3.36588				5.98556	3.91696	2.65395	3.08978	2.59617	3.093	2.94006	1.68313	5.38655
4.04702	3.80923	3.34223	16.5383				5.8772	1.93227	5.604	4.20658	3.68514	3.64034				5.14434	3.89151	3.02066	4.81493	3.29735	2.03197	3.58382	4.26417	5.02628
4.823	5.22851	4.08962	2.07049				4.36854	5.68425	5.42061	4.47727	3.8007	2.31346				2.28962	2.98559	3.25318	7.31352	4.57676	12.2619	2.96205	9.96491	3.19421
3.03058	4.13716	3.5916	6.62491				5.10093	3.5688	4.98417	7.18588	2.08379	21.7128				3.00017	4.61111	3.00279	4.63867	1.65453	7.10033	5.99339	4.82628	8.78689
2.47917	4.18566	3.49172	2.3412				4.42885	5.30296	3.73245	3.38487	5.67971	5.56112				8.19922	3.34442	2.35409	21.1475	4.52981	5.77023	4.01656	4.23154	0.98031
2.86158	4.0371	3.29448	14.6536				4.89854	2.86792	8.36124	3.80497	18.3617	8.26419				4.50692	4.19871	5.52241	3.21866	6.88356	4.88327	9.8081	4.68275	7.91753
3.31253	4.36781	3.42821	3.16752				2.49578	4.22049	2.07769	8.76528	3.69527	5.00757				6.26799	3.3779	3.03561	3.55378	5.47849	3.95965	13.8783	4.037	22.7616
6.70969	2.54395	9.87981	1.0979				3.65804	5.05751	7.37185	5.52228	7.15626	14.2388				5.45419	5.50803	6.4671	2.63228	6.095	6.07117	10.1842	3.93833	2.85419
4.19238	8.39985	4.03388	6.96341				3.93152	2.35924	10.0222	6.36239	4.50946	7.78808				3.06801	2.23342	4.70814	4.93899	2.36303	25.9935	1.29259	4.92896	2.71848
2.96218	2.75045	3.35574	6.45237				11.1216	1.75501	3.07889	4.13743	3.14917	4.78206				4.79845	10.3458	4.70961	3.55922	4.97059	10.0758	3.03709	6.94103	3.70761
4.51918	2.92028	3.17459	4.1882				3.09946	4.32957	3.8669	5.44775	1.54649	2.97601				8.01626	6.44904	11.8912	4.06956	2.42382	4.74177	5.70472	3.82178	2.75951
3.15914	4.99249	4.13042	4.23295				2.29182	5.06748	4.78487	4.63401	2.57785	3.45559				7.22549	8.21271	5.92908	2.34515	6.74744	4.49798	4.26499	5.52603	7.98124
2.0702	1.50525	2.99854	4.09984				4.55256	3.00919	3.52332	5.69945	10.9219	5.16542				3.90837	2.92558	5.70678	2.99602	1.87934	5.15021	4.96426	3.46663	2.819
4.62663	2.99129	1.33625	4.3436				11.901	4.62182	5.14263	2.80075	3.54997	3.05487				5.29933	3.04341	3.37068	5.11777	7.93736	3.92328	3.33125	5.33851	2.27494
24.3215	3.45101	5.20645	5.85185				13.9635	6.8285	10.5906	3.73364	3.2715	4.87768				5.06865	4.03173	4.2517	4.534	3.45331	18.7145	3.33389	5.7873	4.76894
8.25165	6.63926	2.97485	5.75274				2.6757	3.68155	4.69801	2.82459	8.04503	5.98693				6.19839	7.26154	12.9744	5.63574	2.85457	1.34796	11.0472	2.63552	3.13702
3.70582	2.97913	1.29422	3.01961				4.05571	5.72971	8.35252	4.52875	4.88793	7.96685				2.43962	7.47011	5.90566	5.41172	3.53125	0.824266	6.52817	4.65271	3.07739
4.50766	2.22845	1.5677	1.58882				5.24697	7.57102	4.03278	3.8044	10.8587	3.97923				2.28689	5.92751	1.58862	8.09138	3.4407	16.6632	3.45813	4.88223	10.4932
2.90194	3.78389	11.0618	12.302				2.91655	3.44244	3.66893	3.88982	3.91866	5.0419				8.47807	2.11493	3.55561	3.63859	3.53309	5.46311	3.49315	4.01979	6.06842
9.34585	2.30254	3.54992	5.2962				3.60329	8.70482	8.50657	3.79926	3.77224	2.24244				1.22166	7.48919	6.58341	3.09324	2.83787	3.60134	6.44146	10.1905	3.51999
3.45262	2.87057	5.53317	5.37142				4.56819	4.2896	10.0176	7.32548	5.98605	5.24239				3.98817	3.82909	11.4873	3.50177	2.88424	5.51371	4.49418	3.01924	1.50588
3.2793	5.50428	3.22609	4.44122				3.00369	5.35648	4.22979	4.95882	3.52488	1.75905				5.74009	11.4943	2.87681	2.01578	2.81678	4.68457	6.55784	7.25002	6.46056
2.49648	7.79253	4.08351	1.1314				5.96162	3.68479	7.68443	6.15592	4.37342	5.56866				4.62919	8.25376	4.07335	5.61266	8.70194	3.30108	4.95858	11.5617	4.09592
3.02818	3.68751	3.92395	13.8177				4.0543	3.90547	8.38222	5.1548	6.3053	4.45596				3.22649	4.49204	4.9347	3.77896	4.55463	4.10688	7.84044	5.00318	3.15223
1.69612	4.22493	4.18482	3.59919				3.05942	3.10244	1.86729	0.725535	5.21097	4.5923				3.35584	3.24098	3.44837	2.65992	2.86396	7.50536	3.945	3.94431	8.56477
5.52305	3.20005	10.3986	5.52772				6.58925	4.6708	4.03514	8.57738	10.6788	2.98258				8.66916	3.6951	4.43396	3.13308	2.27739	5.08278	3.55983	9.40144	7.11054
3.90547	3.85752	5.16031	13.2399				7.7141	5.40481	6.49384	2.29695	15.6154	4.49902				3.57413	2.46323	5.72931	3.0743	6.95144	15.1947	6.6509	3.06122	8.40266
3.76956	3.96894	3.98955	2.66836				3.66448	4.02731	4.52947	12.6659	4.04518	7.87652				1.95543	2.48189	2.63356	5.12249	4.12843	3.17254	10.7961	4.06986	7.40259
1.70671	4.87396	3.94887	3.2195				4.75664	5.78295	3.64461	1.95615	1.11993	8.05845				3.93866	3.50829	10.0362	5.96866	2.55044	10.817	9.55156	3.44057	6.27262
2.50042	3.11854	5.03518	7.596				2.24126	6.77098	6.23404	2.37129	2.66796	3.67913				3.99193	4.80332	4.84843	4.56415	6.82825	5.93841	9.04594	3.64068	7.71428
3.68654	2.47262	2.84966	3.38635				4.25259	4.54582	2.61343	3.9516	3.03827	25.8299				5.48852	8.5567	5.06749	3.98748	10.9645	4.4309	5.25434	12.3849	2.14634
15.051	2.75078	3.36238	4.33603				4.72329	3.36025	5.52907	5.26739	3.75653	4.31056				2.79075	3.25596	1.83151	4.27307	13.1114	2.28175	1.97665	13.0963	14.4298
5.23938	4.20412	3.28302	11.4339				4.23638	7.02062	5.0795	7.03008	3.19718	5.028				6.64125	2.5733	5.69824	3.59105	2.66253	5.63682	14.2512	2.83256	2.98737
2.58613	5.55925	2.33058	10.4478				3.61279	4.31242	11.4461	3.83755	2.94111	4.81028				3.68557	6.13856	4.6663	3.78006	4.42196	11.4924	2.74251	8.46949	10.0262
1.03877	1.85559	5.48477	3.92266				2.88044	0.836672	4.60634	3.69404	3.86695	6.82378				5.14446	19.2699	3.60302	4.33172	3.44259	5.52655	7.51445	3.07698	2.52408
2.56499	6.3425	6.31419	10.1327				4.25933	2.63191	2.65112	4.01358	3.29012	3.60424				3.15297	3.30089	4.30208	9.60185	3.15898	5.27315	7.10091	9.23948	6.25678
2.4643	9.0007	2.22055	1.6796				3.07683	2.71729	3.85329	3.36826	3.40741	8.6799				4.22769	4.35559	2.46348	2.52983	17.1941	7.63011	3.55493	2.58379	3.39608
2.82314	3.73452	3.10987	2.20704				6.41447	8.37406	2.60488	5.46071	4.1031	3.36817				7.18459	1.4843	3.46266	7.83137	5.2298	3.6482	2.09901	6.26075	13.2216
2.14667	9.06239	10.2445	8.02743				8.28388	5.30411	7.2801	3.1642	3.6116	15.2692				3.09616	3.8891	5.31078	3.27294	7.70802	16.3436	1.16675	10.7497	7.12381
2.12974	2.29875	6.34628	3.04208				8.84442	4.37755	5.64066	2.37882	6.40863	4.14422				34.1741	3.43775	4.09122	2.64483	3.11515	3.65894	2.53669	3.32559	4.77316
5.97146	4.81733	3.21217	4.68409				2.24277	5.28568	3.63298	2.28612	3.18248	7.65692				5.49404	4.58862	4.70645	2.86246	2.1318	3.71625	8.03473	4.6855	1.46688
5.12419	9.06928	3.5994	13.5958				8.67983	4.24161	9.15031	2.30642	4.73302	7.42739				2.61816	10.9553	3.31989	5.17586	4.41563	3.73726	3.54341	24.9344	4.45308
2.67773	4.39011	4.50451	2.00519				4.03257	3.54151	10.8437	3.51293	11.7402	10.1572				5.65459	4.88187	3.50318	3.66315	2.52235	2.40646	4.43968	8.90026	4.30681
2.85067	6.20269	3.41924	5.8626				3.65073	3.26847	14.3985	4.64109	1.09469	7.48912				4.63436	5.84292	6.34866	2.96958	11.3684	18.6806	4.04615	6.1719	3.55598
4.9032	3.82518	2.11598	4.20059				5.74222	6.86025	4.57301	9.01715	4.97742	5.05699				6.57655	4.58154	3.56157	8.62828	3.95374	4.20514	3.93169	5.54799	5.51845
4.026	4.43127	3.05216	3.1788				5.64042	3.99206	4.85983	3.85626	7.83927	3.5684				7.17598	3.31769	4.42152	3.1332	4.15225	4.86712	4.47159	5.23767	6.70705
1.74672	4.73975	3.60164	3.46786				2.77499	7.76719	4.31977	8.9091	3.21932	9.20466				3.01401	2.59178	10.92	3.13027	7.40986	4.14252	4.22599	4.79533	10.4595
1.53996	2.87398	4.60415	3.94177				7.62156	7.4679	4.55965	5.12104	12.7803	4.66015				10.9096	4.82591	2.9341	5.09036	12.544	3.6007	9.33906	5.49867	12.8058
7.89344	2.54972	3.90431	6.7369				3.54805	5.97868	4.90454	7.4148	7.75363	3.34256				3.18676	4.56219	6.87022	3.9382	3.60022	3.12389	4.4322	8.151	10.4049
7.09839	11.3177	3.29463	3.44218				2.65255	12.6837	3.0367	3.22995	6.17865	4.0986				4.4734	3.18932	7.33445	5.85472	7.43834	4.45425	4.31924	3.35781	1.46764
4.08376	3.19194	4.08393	3.00525				5.13484	3.44211	7.91973	2.99114	2.43841	5.64636				5.67279	3.76513	2.26293	4.93995	5.93212	5.8687	12.6875	10.5224	10.1977
2.31839	5.46642	5.52648	2.76674				2.0978	3.42652	3.83921	5.46544	9.91929	4.59253				13.1081	2.90334	6.06193	4.00616	2.44207	5.78587	5.92048	10.7546	5.97064
9.27324	5.37388	7.19913	5.70974				4.48562	4.6544	4.96429	3.41953	4.76861	6.99891				2.46084	4.6829	4.49527	6.48885	2.70428	5.12627	5.39848	3.41176	20.1917
4.9741	3.41454	5.18281	2.15697				2.46428	9.55215	4.1823	5.12329	1.7598	3.82257				4.10647	4.36785	5.31036	5.89098	1.51602	3.4953	5.40687	3.5976	6.39145
2.12606	2.29451	3.57955	9.44879				2.46752	2.69318	2.02344	3.8245	0.968662	3.77264				1.71801	4.59739	4.39915	7.93977	2.4245	12.7702	5.92267	6.91434	4.18779
3.15929	13.6561	4.96465	1.78642				10.0558	3.57144	5.20901	4.79408	5.08629	8.15212				4.48796	1.90691	2.88935	3.18313	2.41313	2.16981	6.82726	5.33725	2.0911
4.5831	8.78209	3.88153	5.70594				2.22177	6.12651	9.20556	11.456	3.378	5.7433				1.11074	4.07679	3.61226	4.53252	3.87414	6.44832	7.63858	2.80026	4.64365
6.8954	1.96385	7.85432	3.5699				1.07046	10.0348	5.19584	2.76508	4.18643	2.02821				7.49184	5.04197	2.20053	3.70604	2.21196	3.82516	1.82209	3.02938	8.02719
2.04379	3.36965	4.58192	5.33375				9.33254	4.6923	3.61394	2.73031	3.97945	2.63367				8.62603	2.78588	12.3361	4.12773	4.2236	5.10612	4.84262	3.54125	4.29317
2.66791	8.42796	7.04437	4.35533				28.3578	3.14285	2.22436	2.44573	2.92585	3.68163				4.00152	5.82301	2.71026	3.19222	4.09352	4.49774	11.8839	3.20147	8.08498
13.2207	2.80268	4.0543	4.69765				3.24302	9.31978	3.39801	4.10807	6.37698	3.99995				2.6927	5.05057	2.80013	4.88028	5.03463	7.31814	7.7656	5.64449	7.42924
12.681	3.79471	4.68429	2.95222				2.91757	4.37763	19.8313	4.2369	6.44594	6.24758				5.77207	3.80221	20.0845	6.4609	4.70622	8.7024	10.1545	13.3089	2.73209
3.72906	1.14423	4.36895	2.9418				2.88948	5.28364	13.2127	5.18701	3.01209	3.80337				5.17069	3.44986	3.03138	1.78991	5.91309	5.28128	3.19733	4.73772	2.81573
3.71807	2.56077	5.66627	2.83456				2.9192	8.25666	2.48229	4.5347	4.35772	2.29932				3.2761	5.41731	6.68767	4.98407	3.20727	4.86292	4.59101	2.99438	3.67649
3.51767	4.90138	5.23816	4.68596				2.9836	3.22036	4.4579	3.48909	8.36489	6.18298				8.00603	8.7948	3.60296	9.31295	3.29978	11.147	1.68242	5.34328	12.1516
3.091	2.82552	3.69988	1.81139				3.79049	4.31514	5.00821	4.12696	1.55329	3.15115				4.46145	3.4625	3.67211	4.36355	5.53707	4.09085	7.27969	5.0618	5.29601
2.15914	3.24923	6.83846	4.26309				3.21671	3.19977	4.29558	5.43608	2.91016	4.04787				4.06149	4.60922	4.06292	5.63374	3.16749	23.7291	9.86828	3.69322	9.95912
2.82389	2.63071	5.51301	3.20985				9.09284	6.92291	6.97508	3.47199	11.1163	3.48802				4.25356	2.78699	3.49886	1.80606	1.65621	7.99193	6.15443	8.77041	5.67621
5.00123	3.14347	5.73755	5.50572				2.90658	6.28325	13.4354	2.44019	17.7303	4.67272				2.87339	2.78669	8.29381	3.19908	5.45333	3.1173	3.13368	4.26606	3.65171
5.09182	3.60778	3.61637	2.28528				3.66338	5.45756	5.93967	5.35064	7.99108	12.5309				3.13254	4.90405	3.69556	5.92978	2.03117	5.54611	3.30143	4.68987	8.18589
4.8373	3.03448	5.89189	4.17089				5.29967	3.26658	9.38851	2.59902	1.51694	10.8605				4.23865	5.17992	5.77455	3.26952	4.65873	5.65477	4.69294	6.82023	1.46833
3.65932	4.2943	3.62894	5.55781				4.99292	6.72306	6.25211	4.27294	6.81696	2.97031				10.1698	13.2182	3.26322	3.51705	4.5866	9.93862	4.31006	10.4451	2.36332
1.47364	3.45911	4.01278	3.84612				2.56704	4.26956	5.95069	4.39607	5.63977	19.3653				12.3139	3.9676	5.98745	4.29794	5.43828	7.04246	7.35376	6.14517	2.83806
2.0316	3.67812	6.72271	12.4895				6.063	4.98681	5.9306	3.6281	4.54719	7.73567				5.53167	4.80314	5.36956	3.2027	2.86058	2.98244	9.12127	5.62522	3.47372
4.63052	2.74257	5.20572	1.45476				3.14863	1.81723	4.7977	4.06635	6.43086	13.7399				2.72287	3.10894	5.17967	4.33188	3.11912	7.52847	3.13426	7.41742	3.3183
1.75723	11.8272	3.89403	4.18243				4.54674	11.9779	10.7935	3.69142	6.23122	11.4422				4.90533	1.7387	4.5215	2.4863	4.09079	5.42516	5.16764	2.74256	4.06385
7.0374	10.1407	4.06838	5.75622				3.7726	6.48467	7.00158	5.46558	2.95555	4.26109				4.72536	3.1468	6.99463	3.41769	2.39648	1.48564	11.7282	3.02627	4.24972
2.83729	1.42869	4.74289	4.72798				4.73021	7.23743	5.25436	4.14129	4.38783	2.84127				3.98505	4.97548	2.08492	4.09802	2.76049	2.98783	5.47538	3.45531	3.14835
2.04803	2.43665	1.97507	3.65444				2.39108	2.37358	4.48945	4.83478	5.2541	4.54744				2.36696	6.72076	3.61544	3.39419	4.15737	3.29367	8.06099	3.92925	5.99805
3.63639	1.94234	4.38586	4.24468				2.41279	5.17847	7.26552	2.91884	3.42436	3.96437				4.98516	2.86759	6.53059	3.44619	8.07918	3.04562	4.12377	15.145	2.83674
3.18734	3.04569	3.68206	6.91601				7.93437	4.10817	7.59356	5.81348	10.1202	4.4117				4.09213	4.26647	3.83672	1.81788	2.50895	5.33326	4.06374	4.32888	11.7289
2.78625	5.95592	2.54348	6.86602				3.4733	6.80276	3.95485	10.5481	2.71229	4.99967				3.35314	5.31593	3.70448	4.49054	5.70015	3.2164	4.05707	6.0709	4.41821
4.00426	8.23264	8.28862	5.71418				1.48397	5.87618	9.30792	1.96932	5.66173	2.92331				2.72599	3.59889	5.07701	10.1852	2.18508	8.02952	8.26143	4.52623	5.31602
2.28762	2.30768	3.28564	3.01835				6.21341	6.60673	4.85718	3.6355	4.05384	3.26157				4.37669	1.11421	1.59371	3.16382	3.52793	3.01325	2.34068	14.7977	3.04072
2.79887	4.19491	7.40511	2.30584				1.51066	4.56544	2.26692	3.33125	3.85688	8.46479				4.00826	2.9719	1.02069	4.05963	2.46024	3.16777	3.587	5.36868	3.76126
2.07352	2.60892	4.59717	4.77187				2.28779	5.00204	4.63035	2.79378	3.04164	5.10711				7.2365	2.62699	3.40583	3.39161	3.34911	13.4461	7.53713	12.9437	6.56848
10.1358	3.75808	4.11851	2.97319				1.14783	8.23387	3.8962	0.91173	18.6697	5.69277				2.05213	3.41998	1.36588	3.94965	2.69048	3.10526	4.27569	2.78927	3.01156
2.89393	2.89223	2.1721	3.02003				6.99032	4.53838	1.96601	6.08697	4.44629	1.50137				3.65866	3.34691	4.85012	4.85067	2.84141	11.0122	3.51831	5.84313	5.00591
4.20292	3.0057	3.23296	2.41164				21.8807	8.25442	2.64669	5.72149	4.22821	6.82533				4.2571	1.40226	4.70954	6.08618	12.582	4.99384	4.01266	6.79607	2.58286
2.67003	2.46193	4.38997	4.23876				3.81775	3.55752	4.93899	3.06293	3.32616	2.82108				4.67419	4.99655	3.0425	3.47117	3.31052	2.68369	1.62188	5.88432	13.9972
5.0656	2.76458	3.43105	6.26591				3.36066	2.2929	6.36569	8.23781	3.94434	6.71751				4.53846	3.54559	3.7292	7.82423	11.0616	4.89141	4.78408	6.65183	4.86015
2.32315	5.34726	3.01846	5.77543				3.02568	8.70738	10.6111	2.09644	7.43232	4.28797				5.14193	3.12086	4.37289	4.50885	3.61807	2.76334	5.31683	10.4111	3.48497
6.61073	4.53323	8.19815	7.3266				2.37484	4.04483	5.03834	3.35346	3.93791	2.19823				3.24959	3.67802	1.71113	2.96123	1.79085	5.00173	3.09126	10.5415	1.22737
3.38949	8.77238	3.66217	4.10515				3.00913	2.08018	1.45585	4.1347	2.42072	2.57611				14.3583	3.93019	1.71685	3.50855	1.39023	9.19091	14.6139	3.61092	4.27333
13.8138	3.31754	5.5295	5.65227				3.14596	9.85962	18.9135	3.74968	5.08265	17.2313				3.56264	2.69264	1.52786	7.77494	7.7059	3.03811	8.81941	2.34896	8.59237
7.53128	4.28946	3.50087	5.01309				2.36101	5.21307	3.02625	6.32297	9.78632	2.65201				2.68833	2.74728	1.5732	3.29893	2.23445	5.44419	1.8791	2.75691	3.02733
2.31807	4.34681	4.4458	5.9552				4.72201	3.22086	4.64632	4.51597	3.97628	3.50788				1.70349	2.15797	3.9869	5.46687	4.44539	9.87659	1.96019	3.58704	5.48627
6.18752	6.11065	7.06516	2.62442				3.15681	6.70721	3.73517	4.64837	5.11411	3.32412				16.2994	8.86841	5.11465	4.2957	2.79956	6.64381	2.37782	3.78776	5.59714
4.16428	5.49842	2.57817	3.44382				4.07438	3.66288	2.239	4.01895	4.5044	2.73195				3.63376	17.0904	7.45408	7.5788	6.25864	3.25217	7.78782	4.50536	4.28986
2.83145	4.56238	5.07199	3.25867				4.00563	6.82978	3.81642	3.40862	1.88208	5.44324				2.71302	2.57537	4.06608	4.16335	3.21953	13.1984	2.15123	3.33957	3.78763
2.81798	2.02905	6.56089	3.07316				10.5266	5.45419	4.24845	5.4157	10.0465	2.80261				14.8107	1.63419	5.2332	6.89939	13.0139	4.56366	2.61769	3.20742	5.62244
2.61945	6.28498	4.29817	9.86022				4.24078	10.5047	4.44754	3.65999	3.05454	6.80808				1.87152	7.6753	5.8422	9.52659	2.34099	10.6388	3.82729	6.78219	8.08682
4.15884	3.71942	4.07403	3.14095				6.7643	4.45034	3.62799	2.92746	8.71325	3.16515				3.81887	3.44439	2.71879	3.57364	1.40374	5.2908	5.26902	4.07956	3.41127
3.81069	1.80808	4.24033	7.2716				2.67096	2.82565	5.68105	2.73742	2.44784	3.86925				3.90018	4.16738	2.92082	5.84522	2.55591	7.08442	4.45842	1.01974	3.15487
6.25243	1.79546	2.20091	2.71032				1.7023	3.29833	11.1549	4.7433	2.26384	5.31281				3.51789	2.90186	5.08866	3.85942	1.74491	2.42171	3.59982	24.3134	5.61242
5.60761	3.59153	3.37067	6.6012				1.7876	6.18749	4.7702	3.33825	1.98644	6.92181				4.93828	4.19553	6.36853	3.4734	0.75348	7.18783	7.32083	10.3127	5.33084
3.05129	1.37166	1.80591	4.97452				1.47335	3.33949	7.46263	2.62709	0.899757	6.88049				5.18817	3.14336	3.29841	2.81994	3.60235	6.14641	7.57903	3.26596	2.60209
2.96814	1.88236	3.07728	4.27713				5.71857	4.93814	3.05169	4.07326	4.29569	8.43456				7.94545	5.25517	5.47424	4.68726	2.30287	3.24177	11.7706	12.2635	3.70986
7.34575	2.17191	3.10287	5.06229				7.33678	6.90697	3.61562	5.68996	2.64306	2.10791				5.41858	4.24513	3.91939	6.34499	2.77525	3.43799	6.60156	4.93501	9.57999
4.18778	4.71822	4.5875	3.51382				2.26082	2.06085	9.94032	1.83236	7.39083	8.07131				3.84434	7.03963	4.54005	10.45	2.33836	16.5023	5.29632	4.46945	6.25724
4.82175	4.13838	1.77115	12.0332				14.9665	9.54926	9.04023	3.92469	2.91677	4.28902				4.5208	1.79103	4.99016	1.64848	3.26052	2.8998	4.03567	4.42896	11.2831
3.37794	4.40749	2.86535	3.21759				6.038	1.5231	4.08403	1.89191	5.4208	2.84618				2.46717	3.19697	4.6653	6.42447	2.44286	6.99092	10.7018	6.63059	11.0046
5.96644	2.63896	5.80819	8.11956				4.44037	7.04459	7.31344	17.1596	3.36773	1.33249				1.92669	2.91762	5.07014	1.97391	2.92985	2.13282	8.38638	3.67909	11.605
3.09884	3.44257	8.35478	3.37763				5.66986	2.13636	7.17868	4.55028	4.56113	2.20998				4.39858	3.64879	3.71095	1.28918	3.30332	2.22285	2.64229	9.2385	4.04206
2.69904	9.2493	2.68911	2.16946				9.08305	2.61741	1.66918	2.53426	6.05106	1.29583				1.07371	3.6818	7.64657	5.30474	6.594	10.2561	6.53965	8.09685	1.89222
3.56546	7.74261	6.26214	2.86447				2.76343	8.77215	6.47427	4.89852	2.72472	4.10379				4.64097	4.19077	1.83971	5.53326	4.3203	10.5412	7.56254	3.09706	6.03758
1.52907	2.88602	3.58293	2.6973				4.45896	2.577	6.00192	4.24415	8.5771	6.46977				3.665	3.41867	3.14674	7.79631	5.91932	3.27594	7.81745	5.70594	5.54432
3.72412	2.19647	9.13748	6.65048				4.68395	2.62784	6.06576	4.8215	3.70021	8.5556				3.76802	3.81179	11.0725	6.14491	14.14	2.98232	3.01329	3.56298	10.8996
4.71333	11.1759	3.45228	4.82997				5.25026	10.0932	6.58211	4.13148	4.74234	2.78049				13.5706	3.96205	5.24805	7.55852	8.51098	3.95492	13.2008	6.79037	12.4441
4.84443	1.46616	1.9976	3.77404				3.28002	5.07139	5.71462	6.33434	2.36115	4.92509				5.50406	2.8592	4.72105	3.29264	3.81027	3.62085	5.19191	4.76741	3.07041
3.78334	2.77723	4.11856	7.58338				2.65207	16.8653	2.21213	6.45987	2.19154	14.5119				2.23444	14.08	4.73698	2.38784	2.13698	3.11993	2.70191	3.93703	3.25082
1.57929	8.24173	3.19962	3.92586				5.70652	2.65918	6.92413	4.53549	6.8481	3.76032				6.43841	5.45095	12.3969	3.93883	3.52094	4.9756	2.09147	7.06075	2.18785
1.43846	3.75389	3.34834	7.89986				4.61295	3.93145	2.91164	4.13827	2.31433	4.57166				3.81465	8.44776	13.8579	5.04782	1.71478	12.4817	5.46642	2.61449	3.15217
2.61012	9.34188	5.38328	5.87614				9.85383	4.83066	16.217	2.40214	4.75517	1.99505				3.51122	3.46727	12.2583	4.669	13.0602	6.71964	2.7787	5.21283	6.503
3.56638	5.35372	3.0762	2.25802				4.33149	18.902	3.78263	3.68212	2.60384	3.86999				4.70575	4.916	3.55749	5.68892	27.1231	6.20758	8.95841	11.9311	11.8005
13.3992	3.81025	3.11509	3.75364				11.2192	9.62524	4.49891	6.75834	2.34091	11.5813				4.31056	4.02242	2.96323	8.16608	10.3894	4.57278	16.1746	3.25156	11.1723
5.30603	4.96255	6.42117	4.23624				4.82553	2.38377	3.11903	5.78959	7.06558	5.71688				2.56177	3.37881	3.78183	4.40384	3.5715	5.6061	3.02842	0.920318	2.93839
1.87299	3.57716	3.28909	5.23071				9.36216	1.66376	9.79927	3.51306	2.76252	5.30403				3.21533	5.93463	3.79249	2.87806	2.5882	6.26459	2.28655	3.52304	6.21149
3.52885	6.35262	4.94295	1.97047				3.91642	4.05128	10.4897	6.75052	3.462	3.83953				2.71498	3.34028	3.99167	4.93609	3.08294	3.14255	4.90405	20.8822	1.37836
2.26494	2.8225	9.15254	9.47269				14.0282	4.50102	3.28249	5.89416	25.0196	5.85782				8.52318	4.68457	5.49949	6.29205	5.16042	3.3105	4.13593	2.7184	7.97587
2.93119	4.01385	3.4008	2.11329				3.76858	4.84265	5.76935	4.72704	3.73185	7.6815				1.90355	2.24227	5.19543	2.04682	4.03891	2.63914	3.18407	4.58168	8.87178
4.11187	2.24497	4.22348	6.05251				3.23327	4.78576	3.67438	3.91457	1.92725	11.9636				2.78059	4.49833	6.07159	6.90294	2.93786	12.5271	3.78672	4.35517	8.84204
6.51436	2.55336	3.07268	4.95602				2.79646	8.62908	5.79517	4.882	6.17222	7.87486				2.92346	4.14549	4.81188	2.38074	2.21669	12.8211	6.61993	4.06773	3.34576
2.46666	2.95262	2.04491	4.09326				5.43823	16.0592	6.8194	4.39765	2.39031	10.1769				2.81388	1.8964	2.68925	6.46015	1.85387	7.5372	3.62332	4.46701	7.11334
2.83501	8.68779	4.24041	3.7995				9.00064	7.83445	6.64574	3.75921	7.43561	3.45307				4.18106	2.03232	2.62889	11.7909	8.39603	7.95884	4.32245	4.81504	4.97048
2.16821	6.98088	6.94226	6.40057				2.69075	2.39693	11.8554	6.23109	4.30772	9.76573				3.10533	0.515227	1.9927	5.32168	3.60501	3.13084	6.14802	3.59044	5.21035
3.83497	5.89419	4.79108	10.8698				2.32466	3.6198	5.5344	4.84431	6.34149	3.31407				3.28001	2.63767	8.92364	4.06987	1.21471	1.02785	7.56336	10.1867	6.68331
2.0621	4.32769	4.44353	4.90665				3.53186	4.33868	4.02168	3.41536	6.26671	15.1766				3.77648	2.40177	13.5535	4.69308	2.45145	3.84965	8.76322	3.65615	3.30335
2.936	6.5359	2.93012	6.19479				4.56497	7.29143	8.09884	4.04484	4.32085	7.10434				4.40001	3.95251	6.70642	4.02412	12.2729	4.03625	4.83319	8.29946	7.27044
3.89967	4.39571	2.2923	3.23492				1.88314	4.92066	5.7516	2.48355	9.96813	9.31612				4.16801	3.57919	8.54825	11.077	2.53509	5.82451	7.65951	7.0678	4.22683
3.00185	2.59516	10.9529	3.71581				3.03913	4.67399	5.90666	4.9728	5.44201	3.08373				2.99261	2.84103	4.00549	4.14302	4.19609	3.35011	2.82442	5.19265	6.40958
2.07853	7.01288	3.79046	2.90477				3.17603	7.36825	6.61194	8.49599	2.35677	3.59655				6.88059	3.20072	5.82091	3.05148	4.51284	2.9665	2.91706	8.29274	3.93245
9.08505	3.12814	3.09354	2.00517				3.05584	4.33049	5.39097	3.2962	6.42846	3.14615				1.33127	7.0826	4.19193	3.31628	3.42681	3.86547	4.34458	3.32328	14.4704
7.23338	8.92493	3.89252	3.08954				2.41693	5.62903	4.29761	6.95679	8.02609	4.46391				6.09973	11.2934	13.147	3.14452	1.95106	5.86949	13.3537	5.95434	6.10443
3.8496	7.85652	10.5625	3.04656				6.12992	4.91259	4.04098	4.24857	2.43119	2.87597				4.16393	2.13299	4.16765	4.70289	2.28218	4.62566	5.43021	20.0811	6.34314
4.15343	6.95467	4.69246	5.3464				3.77451	3.08836	1.46189	5.12448	2.35448	3.39011				1.85392	10.9118	3.85063	5.08613	3.68879	3.68181	6.86771	9.24013	1.71204
5.20852	3.69614	6.75876	2.28712				2.39643	9.03244	5.94995	4.05973	6.92099	1.91042				4.20378	4.86172	3.92131	7.56957	2.20826	12.3562	3.79643	3.19957	5.2643
3.6358	9.5083	9.66293	6.76344				7.12594	7.59828	2.32623	3.35006	12.8195	2.44022				3.67059	7.44996	4.90735	1.91994	2.25603	1.33639	8.76569	5.37064	8.78168
2.76849	6.74289	2.83215	3.88934				6.5663	5.49994	4.01539	3.15551	1.94165	2.9281				8.24016	0.912852	3.75958	11.0126	2.2959	7.13251	7.16423	5.3947	12.0334
6.38756	2.74492	5.86201	3.96065				3.23978	5.59783	5.17963	2.95709	3.86421	5.75642				4.20029	4.9284	3.36939	3.52487	2.40235	2.47607	4.18717	8.27594	15.511
6.02265	7.68387	6.74816	8.47084				4.20066	4.13585	3.14477	8.64163	7.55545	3.80705				7.0681	0.774716	2.42381	1.69044	1.85065	3.33177	2.10353	6.37706	6.14412
11.9428	0.75014	7.95334	3.75287				15.3926	4.70781	8.14185	4.61452	3.98561	2.98339				3.06794	1.35483	4.0744	3.91118	7.2248	6.32485	4.55369	7.69651	3.88527
4.95639	3.04303	2.64333	10.1986				7.60789	3.7135	7.61106	4.79875	1.92174	6.84844				4.06011	5.57671	2.61431	4.06846	1.99206	2.84015	3.48704	1.83193	2.61079
3.62081	6.16194	2.6302	3.95644				3.74513	2.88389	12.2073	3.40755	10.2617	7.90637				6.75339	3.79928	4.66607	2.14947	2.03465	2.70555	6.47766	13.92	12.4877
4.43356	2.85595	3.94103	1.68478				3.01134	13.0832	4.23558	2.76015	4.22065	6.14585				4.13068	4.67257	5.40796	4.39895	3.13874	6.64682	4.0441	4.50296	9.90905
8.37411	5.56809	4.39728	4.12539				2.35664	12.0393	2.65457	8.05208	2.98343	2.54363				3.15209	4.26282	6.8614	20.9895	2.25887	4.45899	3.09472	2.00817	3.00295
2.38815	3.92087	5.43581	2.91934				3.97271	1.30682	4.70061	2.41626	3.1569	8.48835				1.49663	3.86946	3.35901	3.58211	3.4759	3.30193	5.95017	6.68215	5.17169
2.65736	4.80332	4.68913	2.70729				5.59342	5.92623	8.43379	2.83398	3.76109	2.82591				2.27202	2.80906	4.2852	3.75821	2.546	5.13815	4.37277	8.33426	5.00279
12.966	3.21868	2.70741	1.75348				3.09829	5.77817	3.25414	5.55592	4.47748	5.79689				5.91314	3.35681	9.36778	2.44856	10.103	11.4495	2.17554	5.05139	4.38171
2.7634	10.148	3.57173	3.96809				6.09834	8.86893	3.96339	4.32175	2.4709	2.33611				2.49783	2.49221	3.41386	3.32429	2.36647	1.96805	5.43614	8.07906	7.73729
25.4218	7.89907	2.41852	3.35131				4.73677	4.51274	8.88357	2.01552	4.10934	6.1911				2.89426	5.60401	2.6304	4.04449	1.33005	7.70172	2.07153	2.26764	10.2323
14.3372	1.24843	8.01714	4.59978				5.74285	11.7424	17.442	4.79115	6.69144	8.18825				2.26231	13.7643	3.72948	2.7284	6.95153	7.0354	3.01456	2.35229	26.2329
5.26646	2.6477	11.6955	3.21658				6.633	5.84632	9.40212	3.26989	5.25952	3.17347				2.87924	7.02012	2.93456	12.0055	2.72789	5.45182	9.01656	3.18851	2.0885
3.54823	4.42854	4.40391	2.95049				5.94959	11.0313	2.31078	3.71138	8.42597	8.75066				7.04653	6.88523	8.51285	3.04417	2.6305	3.87935	2.41125	3.50868	13.641
3.40699	3.74872	10.4844	2.79053				2.15016	3.43393	2.82397	3.92414	2.61751	4.41144				6.27118	2.91694	8.61973	7.29091	3.34763	3.24306	10.7586	1.91554	8.25179
3.68786	7.66659	4.12111	5.7711				8.93701	3.98437	3.31172	2.77798	11.2894	3.64056				1.47945	3.96169	5.67551	4.62131	2.54264	1.4405	7.84074	3.13194	23.318
3.09594	3.99778	7.0787	3.15512				2.48602	7.69249	2.53113	3.47917	9.90849	3.6249				29.9824	1.64562	5.55013	4.5922	3.88687	4.48883	6.26761	3.08152	6.69443
2.27971	8.16535	5.19895	7.58476				1.69566	4.48194	3.47963	6.13456	2.53673	3.72773				4.2336	3.06938	4.87266	2.98339	3.16735	4.42378	9.96962	6.19154	4.12878
3.27708	4.72314	3.4039	3.81369				9.29158	4.56165	8.90163	4.72814	7.12975	6.01566				4.05475	2.90459	1.6744	4.29178	2.20863	5.12839	5.59372	4.00105	4.65389
5.40143	2.38866	2.108	3.12661				13.3875	3.49878	3.81162	2.61136	1.6458	2.0663				4.31715	6.06662	9.40796	3.07362	3.1014	3.00885	2.54715	4.5862	2.94907
5.27705	10.5615	10.0687	12.438				4.80053	3.68274	6.63753	9.99584	2.19864	3.39443				2.48092	3.02797	11.1429	4.36577	2.66605	10.2956	18.85	4.16107	2.8952
4.42064	13.6269	8.52247	8.73408				6.80094	6.77418	6.5702	5.1359	5.93914	5.68543				3.82355	7.44484	5.2835	3.29697	2.38509	5.03725	2.90433	3.65337	2.65335
14.5637	4.91629	14.9314	1.68426				3.30214	4.02757	9.16942	3.90135	7.93857	2.21881				3.78598	7.23407	4.50427	1.29271	16.8696	6.80826	16.2814	5.09388	3.33264
4.18742	4.25788	2.47652	2.28979				1.4738	6.05297	3.89158	3.66106	2.48789	6.77844				4.46966	3.03478	3.29699	7.01102	2.55286	3.35118	4.52346	5.52399	11.1655
4.11868	5.81105	2.48558	1.97529				3.63197	6.30416	8.77597	12.371	2.93189	5.88681				4.03451	2.59398	4.92063	7.24506	6.90926	3.44714	4.67552	2.8191	11.4829
2.89294	2.58976	2.08391	2.89851				4.2958	6.21421	2.72865	13.1401	2.49752	5.14167				4.56885	3.83153	2.68994	5.11525	2.21013	7.18979	3.90916	4.94576	8.40937
9.79292	4.46306	15.5912	2.65697				4.99365	4.09749	5.59107	3.5767	4.36457	14.0104				3.03598	1.27482	3.12813	3.45173	3.68558	3.42202	5.80825	7.33873	6.04422
3.40314	3.44521	6.1085	1.14383				3.97717	6.18649	7.99176	3.04064	4.22046	4.44411				2.71034	5.71201	4.05033	5.61711	2.18732	1.81603	3.75682	8.45164	8.27486
1.60482	3.62213	3.82092	11.1977				3.26686	3.62064	3.49823	3.37145	3.52843	7.70826				3.88503	5.19307	11.5974	6.54647	3.95623	6.96537	2.59153	5.49552	6.0822
3.79251	4.44886	5.73526	9.10588				4.60602	2.87674	3.44676	2.79227	4.6475	2.74131				4.41631	3.75322	4.64317	4.63444	2.67363	4.18014	6.86139	3.49494	2.9527
4.08785	3.59773	4.60558	2.72497				7.12807	5.22259	10.5818	6.96925	3.38118	5.2789				8.93908	4.35641	4.05083	7.88202	4.36469	9.00967	3.59168	5.78255	9.61536
2.13251	5.03224	3.80815	7.7971				5.46996	3.01976	1.44021	3.87955	5.45451	7.1309				5.34651	3.61886	3.47778	1.5935	5.90189	5.03806	6.80574	6.01599	7.85286
21.6999	12.9393	5.10357	4.82809				6.65567	2.69431	4.77388	3.58217	3.82518	2.61538				6.99904	3.85699	4.36105	1.99734	3.23214	2.75914	4.1087	5.77395	11.9721
2.30694	4.83173	3.10944	10.8091				3.38614	3.38449	4.9758	4.38166	2.77031	4.334				9.41654	4.57962	2.83686	2.24956	3.45527	5.33236	3.78392	6.93215	1.68445
2.92499	7.36485	3.93675	4.12774				2.15018	4.37625	3.81837	4.61423	7.49082	3.27777				4.98177	2.71114	9.85423	3.73227	2.27736	2.9474	11.8445	9.57741	3.74386
4.27407	5.15502	5.53748	4.42922				4.57097	11.0781	5.12833	4.92747	4.73241	3.04234				6.18458	3.67452	2.3836	0.871605	4.0738	4.63529	5.6587	2.7958	3.83435
5.83943	3.86304	6.59402	9.34496				1.91346	6.17203	4.67354	8.75355	2.99709	3.28485				3.7719	2.57978	4.72559	4.56244	2.76737	5.89172	5.33446	12.1306	3.97988
2.1281	1.56842	3.99703	12.5667				1.98461	2.68258	2.16088	5.13792	1.5507	9.29333				3.6382	4.81662	2.80011	3.25016	2.65566	10.159	2.68757	5.94928	4.44281
20.9776	4.57241	3.4543	4.29481				1.17647	3.83655	8.0005	3.49713	2.89728	6.25715				2.70464	2.30878	2.77433	3.51219	9.47832	4.40784	4.16112	3.35098	2.82617
3.6435	4.69645	3.67861	15.6676				13.5897	3.71637	9.87054	2.63282	6.8909	8.61476				3.55626	6.11493	3.51131	3.37314	2.51175	2.96924	3.665	4.11611	5.68282
2.29991	5.23722	4.9563	2.34324				2.2393	7.92757	4.15082	5.74758	10.1787	3.90364				3.06315	6.40854	2.18898	2.75812	3.57189	13.5221	8.13581	6.98297	4.72458
3.25473	3.30188	5.40769	17.4985				2.28674	3.4619	5.25819	2.53697	1.64688	4.24579				5.45958	4.76042	3.21755	3.5194	6.71971	7.12448	7.3913	3.42681	3.35476
3.33908	1.75773	2.70161	13.2971				12.4433	6.83924	3.6621	6.15168	4.99153	9.7361				8.40347	3.00498	5.24989	2.70716	9.38081	10.7012	9.04943	2.88936	7.4909
2.91496	1.73061	3.39777	2.6144				1.02603	4.88541	5.99836	5.2933	1.7092	6.62578				2.68905	3.03443	6.39596	4.70675	5.69109	12.702	8.91464	2.08339	5.05226
1.75788	5.69345	2.91105	1.61736				1.88234	7.28348	12.4633	5.02552	3.52135	4.18955				4.62156	3.21162	7.79468	1.72223	2.60298	6.78189	4.95689	5.03831	8.25701
2.68666	4.2578	5.49304	16.8837				3.44283	9.63843	5.45329	7.01882	5.03571	3.25806				1.75745	1.35153	3.45009	4.17303	2.785	1.55352	7.50509	4.19971	8.10577
2.61529	2.39887	3.62675	10.2218				3.97045	3.33999	2.76818	3.77382	3.88066	2.24294				6.51773	8.12245	2.8396	5.81758	2.70969	3.53971	2.17157	8.09469	5.13532
5.8137	3.97175	4.35679	6.44735				3.94679	4.97845	5.98813	6.59596	5.54517	5.22311				4.49649	5.46419	3.67466	2.97848	4.37298	4.28014	4.8472	10.3796	2.06887
2.74215	2.46628	6.27361	9.57963				2.1795	7.81624	4.11904	6.88626	5.69359	4.91179				4.02287	4.8478	2.22178	3.39996	3.52968	10.495	3.18278	6.5131	8.77275
3.50789	4.36274	3.72089	6.13408				6.28059	4.10102	7.99004	2.4714	2.47604	4.0938				3.32886	3.62297	2.71498	3.23607	5.3252	4.74621	4.45984	2.1566	2.2541
2.78694	3.01349	4.63203	11.6527				3.53426	7.96925	3.06962	5.52461	2.9755	2.63705				5.55376	1.98375	4.87857	4.39926	9.38417	7.25999	6.43423	7.71002	3.74248
3.34471	3.397	5.7135	5.37316				3.64029	2.05615	9.94021	3.97331	2.64882	4.923				3.64945	8.5264	3.32958	3.29153	3.00186	20.9802	2.7915	8.04528	3.89721
2.41349	1.75349	2.49845	3.82344				11.1664	4.8333	2.92242	4.56844	14.6547	11.5888				3.82019	9.7752	3.83592	3.9241	3.17198	8.02274	4.7411	5.04515	5.71391
3.34262	3.17317	9.73407	2.08614				4.37855	7.60259	21.3454	1.9715	3.39448	6.01149				2.91448	3.4267	10.8384	3.56501	2.90135	3.52732	3.6089	5.22236	6.27846
5.95656	2.87792	5.5497	11.1664				2.54417	5.68206	4.35056	4.72827	9.32775	4.67113				7.69305	2.43734	3.59814	3.82737	2.10597	5.05038	4.40136	9.50385	7.72062
2.28981	3.62934	4.35999	14.3631				2.96504	4.26111	4.62136	4.59031	10.2273	9.85185				8.41433	3.00162	3.48405	2.80613	2.30722	4.27461	4.16856	11.0671	3.78665
1.74296	5.46894	0.726988	5.03458				2.98132	4.7693	2.37671	3.61599	5.23544	5.93398				15.6512	4.39917	5.41289	6.46528	3.15941	2.83052	4.91622	8.29737	9.6427
3.45322	9.06619	5.0229	4.41378				2.01097	4.11894	5.69787	5.86882	1.83049	6.73861				6.4587	5.11855	4.81221	2.92581	3.85945	4.1836	6.21859	5.58872	6.21654
3.90867	5.72387	9.50685	12.5943				3.17602	4.04051	4.46187	3.82883	9.76135	13.7902				1.72478	3.54056	5.49252	4.86026	3.69349	5.72258	3.25017	2.83165	2.98317
4.4251	8.59126	2.47551	4.40401				4.45277	8.6294	5.57067	3.30684	5.7865	2.63984				10.1319	4.80224	10.4805	7.06317	1.73365	5.764	8.46855	11.7051	5.59093
5.01238	4.75142	4.9139	3.93422				8.04938	2.79492	4.33025	9.91592	13.7707	4.11352				3.49417	3.89746	9.98926	4.70476	2.45641	6.25544	6.07431	2.72966	3.04791
3.07531	3.70385	4.84957	3.95607				15.2498	6.15602	3.01325	4.95656	5.41599	3.56603				3.57513	3.13822	6.46516	2.09976	3.70252	2.31817	3.29383	3.36989	6.66285
3.90478	7.21809	3.13968	3.48145				8.84353	3.47521	3.35628	11.4646	3.89273	3.93831				3.56578	3.31815	5.05253	1.06046	1.68956	4.31497	4.69634	2.34787	8.66372
2.38993	3.04938	4.17942	3.49726				3.78171	9.3714	5.13891	7.65498	4.46355	3.12816				4.45415	3.72579	3.62332	4.58141	1.93837	3.91866	4.17469	7.77477	6.71094
10.995	6.90276	7.34698	3.21103				3.17593	3.75684	5.56818	1.80329	4.13883	3.35574				2.45333	5.20751	4.03264	3.33586	0.994907	5.39945	4.2716	3.32357	11.9589
3.39525	3.52867	3.86156	2.72612				2.52246	6.61394	7.80605	3.77596	3.78594	6.63351				2.8196	2.02543	3.05334	3.41189	5.33595	3.61291	10.7416	9.61003	2.47813
5.73527	8.09116	5.90372	4.09843				2.93441	5.53159	4.09114	5.51978	8.26924	6.87782				6.928	7.93311	15.7957	3.30996	1.85181	4.77502	3.37664	3.96198	4.34024
7.38755	4.43505	3.31188	2.84357				8.33052	6.28543	3.83149	5.9911	5.65102	2.04983				5.14797	8.56357	3.8916	3.24411	2.2193	8.00456	3.14168	4.82533	7.64435
4.45041	3.62932	8.021	2.88408				12.9967	7.89904	2.58439	4.34927	2.90749	1.84395				4.18114	10.711	4.21202	3.53405	2.17811	24.8557	4.58792	3.21301	5.11478
2.93337	3.98017	4.39989	2.78741				2.6816	6.08623	6.72464	3.39411	7.93631	7.07128				2.84218	0.64561	3.6401	6.43325	4.31944	4.35892	6.74135	4.7746	1.06918
2.89771	23.0062	3.1089	5.15044				1.9328	19.924	4.8613	5.26765	3.58124	3.85508				6.98627	2.09849	5.54296	10.5009	4.51454	8.16462	3.54105	3.47832	2.52979
3.94678	3.29247	3.43084	2.46113				3.09705	9.93012	7.55909	6.10204	3.83501	7.57853				5.61837	2.75017	6.25196	3.97018	2.47565	1.92695	8.53881	5.88257	2.15172
1.65984	3.48802	5.9698	7.69313				5.64386	10.8236	9.07844	3.43315	4.10652	13.0147				2.9471	4.14583	6.08542	4.62105	4.45849	11.8838	5.42934	5.10944	4.03474
5.18252	13.4059	3.8968	4.25196				4.8657	1.61543	10.3671	2.47276	8.70417	4.69963				2.54308	5.16123	4.39418	3.01702	4.03096	19.0964	1.65843	3.75447	4.49097
3.11534	9.10764	3.74908	4.7633				3.34517	1.54425	3.35108	5.70746	3.96754	5.35906				10.896	3.11024	6.23404	3.89246	2.70696	2.81769	3.74893	10.3467	3.21563
5.43483	4.14467	4.62313	5.54647				16.062	15.4104	4.68414	6.66495	8.80158	2.2765				4.12559	2.13698	2.05061	5.78154	1.92128	10.0716	4.48942	2.00219	6.5112
4.01787	6.77618	1.22364	12.563				13.8473	3.04332	4.49479	3.52708	5.36702	15.4234				1.45316	3.02735	5.33873	3.69716	2.90149	2.50934	2.43761	2.89188	10.1459
2.05825	3.25788	3.39028	1.71801				10.7675	4.94363	5.43495	3.74754	2.88119	5.59009				6.59358	3.02053	6.4582	3.73623	2.86166	7.50535	6.81491	3.75807	4.96457
30.9334	5.245	5.04967	3.69506				4.00752	5.43843	4.25818	6.12345	4.61841	6.08676				5.05814	7.98709	1.72544	2.645	2.156	3.53641	2.03591	6.71923	3.4301
2.71387	2.18256	2.20125	1.52873				24.8663	1.84602	3.89034	3.13278	4.01193	8.42406				1.79472	5.83654	10.2989	3.27565	3.1319	5.25764	3.76614	2.45553	8.77436
2.40081	4.80643	4.54438	2.72022				3.54787	3.16781	31.9598	2.90683	4.70483	4.088				4.68734	3.51823	1.90423	3.37384	4.99682	6.08607	4.44782	10.3962	3.86838
2.15367	3.07509	0.801887	3.03478				1.29081	4.11642	3.49755	15.5604	3.6071	3.24312				8.58834	5.38272	5.21996	2.28082	4.58587	10.2621	4.61417	3.76586	14.8319
1.13808	5.85685	3.79606	4.89682				5.0951	6.35815	2.16347	7.8643	3.25348	16.1149				1.38593	2.36369	6.67008	3.38097	5.24794	8.37167	5.65068	2.07799	9.80734
2.39859	4.91521	4.8459	4.14189				3.98826	5.42317	6.50163	1.83252	8.64151	2.59882				4.4082	20.8673	1.79254	2.70728	4.51061	11.6278	3.37996	4.92347	3.62292
15.233	11.6453	8.38478	10.5951				6.01562	2.87093	1.93591	4.26889	3.97086	6.27937				4.28664	3.02337	4.83798	2.77673	2.15005	5.62898	6.22362	9.231	7.24245
6.02978	1.63463	5.28333	7.5099				4.92116	7.62452	7.60934	3.23486	4.63665	5.24352				7.52024	5.28508	5.5627	3.03562	3.28548	2.04537	13.1811	10.119	13.6782
2.5183	40.7312	4.28275	3.70111				3.26419	3.88723	7.60957	2.72492	4.17241	3.30393				4.03177	4.80237	5.13449	14.7974	2.97097	10.6856	4.04146	2.34632	8.40929
2.57913	6.07236	3.57505	5.16962				2.51016	7.28707	6.75511	0.507792	5.41212	7.34871				2.33652	4.2333	4.85778	4.96664	2.12209	16.9701	3.98349	12.6766	4.09616
2.47287	6.16403	2.38098	24.5819				2.57253	13.4225	13.752	1.74408	6.56319	3.17356				3.8696	1.55476	7.09205	2.29339	4.34284	3.28494	2.72991	2.99796	13.027
3.05806	4.60753	4.18873	4.73498				4.49224	3.1169	11.6013	16.6528	2.70179	2.82537				3.06967	10.5139	7.24942	2.66706	3.85907	1.56637	3.16737	5.09837	16.3176
2.91525	2.49111	4.54794	5.48395				2.34603	6.86181	4.67662	6.87554	9.41538	3.56456				5.61464	8.80627	2.8715	2.83093	9.35769	1.83271	5.87857	5.18054	13.4176
4.36079	4.19492	3.59867	7.12606				3.87799	3.98416	11.3238	3.65717	3.62086	5.33646				4.1219	6.25203	3.24278	4.09426	1.62692	3.19267	3.30744	5.65357	2.55608
3.83584	2.54781	4.55156	7.45456				2.49938	4.10836	12.9567	4.06789	3.10195	3.25255				5.86699	4.29677	2.91149	3.25503	10.3583	6.05512	4.57073	3.70486	5.37628
2.19896	2.91084	2.93117	5.03867				3.26895	3.50368	5.36691	7.0047	2.82379	5.07937				2.37609	6.26769	11.3138	5.03037	5.64254	7.7966	5.53963	5.24921	2.01402
4.93363	1.96195	3.65888	4.1179				1.90737	5.04334	4.64038	3.67968	4.59524	12.8355				3.22513	3.85189	6.18574	3.37482	2.5703	2.77742	5.30213	2.06364	3.96234
3.68381	1.85424	5.74207	4.31026				12.1707	4.88152	3.36087	2.94262	10.7183	4.75791				3.59409	3.24546	10.4454	3.5362	4.33312	2.20563	4.70699	11.2919	4.35861
9.77797	1.6252	2.56769	8.02121				14.3298	8.63486	5.91952	3.62466	5.45972	8.64908				3.91978	3.68429	5.99414	7.78044	5.00654	4.97994	5.91934	4.82716	3.42599
2.7027	11.8206	4.2091	3.21202				4.09354	7.20518	3.36787	3.73504	6.43981	1.30863				1.71229	1.71861	3.86573	3.47556	2.91837	11.4104	2.50188	10.9428	6.26556
7.49545	5.11771	4.6102	2.72062				5.22	3.55021	9.7821	5.89617	5.33878	1.98624				4.45719	6.82805	2.9639	8.75522	7.62738	3.40494	6.03258	3.6794	3.92548
3.54118	4.51405	2.66538	2.39735				12.5476	8.61543	14.9287	4.48696	3.40453	4.18657				4.13492	2.32129	5.46158	6.34709	5.38609	24.9862	2.18723	5.71788	1.94928
16.8481	4.53747	4.17959	6.01504				1.79528	4.22667	7.8596	3.42312	6.01617	4.70052				5.6027	3.73673	4.75073	2.90121	5.17898	7.9867	3.99755	4.14761	4.08622
6.81242	3.85759	3.16264	2.8914				9.27545	4.78788	1.87312	4.30632	5.41503	3.2744				2.55024	4.20772	4.13868	5.11638	1.71517	4.54919	5.20348	5.26605	2.98475
2.06788	11.9657	5.52142	8.4816				22.1023	7.24644	2.09115	2.48084	4.94529	5.14979				3.66255	2.21502	3.77242	3.70753	8.41668	6.76399	1.68811	3.78517	8.04758
2.70749	4.42598	3.79172	4.31162				2.16828	4.86738	2.34758	4.60667	6.95936	4.7586				8.74206	4.77048	8.21076	6.9212	3.62268	3.78597	8.85029	2.97462	1.71093
6.97022	7.16368	4.03986	4.19967				5.89717	8.23482	3.08463	2.29137	4.67379	3.817				2.94345	3.40451	3.51815	1.38136	2.36312	3.71079	2.70577	8.11255	2.20937
3.15138	7.42804	2.68683	7.33904				1.39048	11.1802	13.6607	5.45836	4.26352	4.50155				2.09478	4.47194	7.67151	4.02076	1.76635	4.29597	2.13004	2.57842	2.70957
4.87125	3.12444	3.38116	4.8177				1.49502	4.95864	13.3138	6.22786	4.31283	8.67507				2.84852	3.79868	15.7941	2.67402	8.73	3.12806	2.2746	11.7517	8.57381
1.96195	3.20405	4.75602	5.6291				4.06429	5.83222	3.02743	3.43176	5.95932	2.28086				2.62646	5.13056	12.4006	2.36358	2.48866	8.63137	1.69862	3.10431	4.16441
4.1213	4.18866	3.10782	16.8208				5.81704	10.5363	3.11816	2.78411	4.22884	3.20336				1.95752	4.2588	5.30205	1.57108	3.65538	3.08639	4.36122	11.9751	9.26847
2.72041	1.29638	4.61771	4.65965				2.11878	5.27397	5.5769	8.84552	4.91509	10.3274				8.59946	5.42798	1.89821	4.05192	4.68434	3.71129	3.6819	2.14998	8.20295
2.68549	4.67567	5.4216	6.43876				3.40786	9.16151	4.58597	9.24238	7.08607	3.86924				1.56098	2.5331	10.3331	2.57457	4.31389	11.3663	3.57569	3.64759	5.15485
2.48262	5.4678	3.7727	4.1655				7.95886	4.06458	3.11603	5.77111	4.23502	5.29716				5.99009	1.7324	3.35604	5.84319	5.53469	4.49168	3.49625	4.44432	7.75623
3.02478	1.96944	4.52884	1.93357				4.00864	5.70517	4.29538	4.4693	7.61131	8.85531				4.41268	4.5159	4.69217	7.19963	2.74755	2.11262	7.87769	11.3445	3.24659
2.87493	5.72594	5.01666	5.55462				2.90873	4.38517	8.90573	3.42165	1.89468	7.32133				2.5889	3.2126	3.6566	2.03859	4.61201	10.8044	3.27459	2.64426	7.36033
2.87707	10.1146	4.38669	10.9163				4.15166	7.41121	6.77672	3.90028	6.09756	4.18458				1.83649	3.22352	4.47609	3.49618	1.9941	5.44705	2.97135	4.07352	5.35156
3.84442	2.75258	4.60771	4.91356				5.81107	6.91505	1.52268	5.09455	3.50784	8.45631				7.37285	1.78692	8.43736	3.65168	4.55868	3.07284	4.80772	12.0817	2.28358
3.06783	1.70362	3.49274	5.01822				8.28407	3.1418	5.02906	7.14235	7.27892	4.002				3.86343	2.76415	3.5786	2.46379	2.67706	4.58403	5.444	2.73096	7.42611
5.83982	2.86537	4.09749	15.6503				3.73641	14.088	3.46362	6.64041	4.56948	4.58688				3.40151	5.98126	4.7028	3.05831	11.7817	9.15863	3.51366	7.34119	7.24739
3.21011	3.30989	3.91427	7.86684				4.15576	4.31356	3.25515	1.82461	3.37501	4.56461				5.52244	6.27886	4.40569	4.02228	2.88157	6.3868	8.11302	3.62305	2.79992
2.80422	12.7394	7.11988	8.27774				4.47787	7.76713	5.0245	1.57556	4.25882	4.69941				2.14874	4.22694	4.35796	3.24612	6.14595	2.76464	4.95697	11.7727	3.68735
2.83912	17.7319	2.13378	3.93376				3.89342	4.51101	7.83501	3.56654	4.55702	1.84853				4.09634	2.79842	3.00513	3.9987	3.12124	12.4402	4.32921	4.75559	2.7795
2.87011	2.39733	4.06492	6.34391				3.44975	11.1075	3.70434	8.65167	4.91698	3.72273				4.99737	4.19918	7.1337	4.10521	4.36235	2.36538	16.5188	4.42254	7.99578
4.46901	4.31373	3.69818	4.65497				10.7728	11.6988	9.1132	5.13734	3.15996	7.20712				2.59314	6.03149	7.04721	3.06378	2.38093	10.9706	2.69619	16.1834	11.3668
2.47353	5.19027	7.64443	4.33344				9.69675	3.93295	2.15709	5.89193	3.50777	7.38377				2.19657	2.68976	1.41842	5.5671	3.4354	2.47786	7.71655	3.55229	11.8657
2.56062	3.3026	3.58163	4.86771				4.2029	10.6719	7.45691	3.81354	7.27285	7.31974				4.13246	2.76841	3.11784	5.44552	2.62289	2.17728	5.23207	5.00084	19.7952
3.76559	4.11797	3.38315	3.51727				2.4445	4.98539	3.25942	4.88163	2.73831	3.7874				9.45451	2.66861	6.91068	4.1027	3.51836	3.67008	1.29659	6.75976	1.94563
5.06888	2.71242	6.30764	4.71247				3.55662	4.36615	6.32103	6.48323	7.11939	2.53849				3.56753	7.26447	2.01876	4.13235	4.51102	4.47444	6.77487	3.79729	3.64703
6.03601	3.79978	2.80962	1.61924				4.42811	1.58296	5.47501	3.54458	2.13071	10.296				4.57118	3.1443	6.64684	6.28102	3.27306	3.96906	1.99908	1.20786	3.80656
4.62791	2.66604	12.0913	5.1573				2.23452	10.5348	3.47143	4.04112	4.11753	3.96401				9.45866	4.262	2.31451	4.80778	4.37651	1.85026	3.30771	1.88296	3.94431
2.0146	5.29238	5.75724	23.4136				5.86109	4.64141	3.01962	3.89065	4.04244	10.4781				5.82165	3.03184	6.25536	4.24321	3.65121	7.24459	5.62039	5.5153	3.9726
2.39815	11.7164	4.06834	8.48858				3.97265	4.72247	3.50156	4.18942	15.1987	5.7178				4.17219	4.74419	3.28309	3.3161	1.92337	11.9234	1.65644	3.78441	3.00465
2.30632	2.69072	3.83575	4.66725				11.7952	1.22115	9.85014	13.7829	3.97954	12.272				10.6906	3.23484	3.10811	2.49853	2.1638	3.24164	3.60624	4.98005	2.29684
1.79972	3.04365	3.12758	4.33302				2.85974	4.49385	2.92662	2.83226	3.95646	2.84778				9.76731	7.27257	5.37001	2.61404	2.31777	3.66357	1.63821	5.6395	3.33865
4.93692	7.57164	3.3934	5.27998				8.5212	2.70676	3.68882	2.85271	4.40942	3.00184				6.0671	3.54352	3.35366	2.91179	3.23013	2.47527	1.24512	3.8554	3.3829
3.31474	2.09742	3.51045	6.71202				4.41902	3.96974	2.29317	2.29608	2.82148	6.05415				4.05409	6.97867	4.37801	5.97093	5.67868	1.77257	2.7607	4.65255	7.82261
5.52822	4.12916	3.89032	7.3454				2.26625	4.28431	6.30766	3.10997	2.93025	5.59612				2.42651	2.87631	5.54207	1.84466	2.96776	6.16835	6.04923	4.96312	3.29989
4.37388	3.08106	3.52984	7.06087				3.22546	2.62678	10.1651	2.34271	4.18377	5.45051				4.60532	4.59975	4.04252	1.8945	4.75238	3.21863	4.12758	4.98283	7.00823
3.17483	3.35905	5.78041	14.205				3.55253	3.51644	6.16001	5.96496	2.5272	3.31204				2.23047	3.31287	8.6939	4.35178	3.76665	3.31842	2.94218	7.39705	6.49756
2.95578	3.01216	3.83922	2.89483				3.95656	3.06182	3.42568	7.83108	3.12517	4.54064				3.04952	3.94796	7.78247	2.77499	4.92305	21.1944	4.10097	3.47431	2.02774
4.29175	4.58857	5.62136	4.61053				1.6632	5.05916	8.03478	10.04	2.46995	6.15394				10.198	3.37656	2.83843	2.02463	3.98349	5.34966	3.86308	2.0895	3.5876
2.95793	3.46028	2.32954	2.68173				3.49294	3.06151	2.96944	2.32092	3.09312	4.91494				1.88161	4.03675	5.04227	2.69563	2.86738	7.18445	7.7744	3.67006	2.98878
2.74054	3.19481	5.06356	16.7947				2.80711	3.74027	5.0461	9.6988	4.64673	4.36473				9.6058	2.93886	3.74442	3.16187	2.64249	4.93448	3.03415	6.83047	4.62309
4.35934	3.11441	7.56785	22.8441				2.79055	5.88952	2.53262	3.87964	3.72257	4.6238				19.5406	3.71812	5.28282	3.63826	3.9365	3.04896	10.3789	2.48538	3.18703
1.78708	3.77364	3.56031	14.4052				2.97734	5.52417	5.90489	1.79266	2.7996	4.79538				2.58818	3.39319	2.06253	3.91815	2.93169	7.65091	6.64942	7.01444	11.3002
1.98533	3.05779	3.46595	3.4741				4.50327	3.69905	7.29946	14.9312	4.10143	3.54657				4.74494	3.49936	7.04685	3.30684	2.41995	2.4333	2.36735	6.80642	3.32091
3.85902	2.76899	6.65055	1.44713				3.13417	5.74529	3.48853	6.01837	5.37883	2.5517				4.19167	1.7014	4.13154	3.53373	3.75583	3.46854	4.69394	3.81898	5.73576
2.35999	3.28003	2.70475	8.85357				11.2232	2.03368	5.0507	6.41011	5.54032	24.1223				4.99371	2.48528	3.20871	3.74451	3.82626	3.56413	4.25406	18.0657	6.16252
6.28467	6.69071	4.06203	6.25255				3.98972	3.13542	1.10613	6.02264	2.72661	7.51676				2.9139	5.14286	7.84022	5.78628	5.25618	2.49031	6.35015	7.15207	11.9021
2.29634	4.08197	6.17698	2.63469				5.24602	1.3008	4.98763	4.57543	1.89822	19.8681				3.91557	3.56049	12.3236	3.17187	3.08441	5.11599	5.85786	1.94311	4.42903
10.4914	2.56434	5.05384	3.12418				4.72599	4.84558	7.30688	4.50137	2.46393	11.896				2.87272	4.77432	4.72419	4.44804	0.851455	3.5759	2.63969	4.42442	5.10756
2.04268	3.053	3.7304	8.00642				1.68687	7.4504	4.90582	5.18111	3.84023	3.36766				4.04189	6.16956	4.97191	1.89991	3.81809	3.70931	11.7635	5.59348	7.94928
3.63734	9.74861	2.18688	5.30499				11.0165	5.1801	3.77722	3.28138	5.83592	6.75883				3.00071	3.15767	0.848066	2.31546	1.66479	5.38369	5.70849	4.3569	3.74139
2.31412	3.34505	3.72785	3.88684				3.95343	7.24249	3.72272	4.04602	8.04042	8.46976				1.3073	3.88197	1.00878	6.90177	3.07584	1.74555	4.90636	4.29138	4.91528
3.32658	2.84957	4.45855	10.7576				3.22646	6.04049	4.67405	6.25774	6.01579	3.39371				3.42815	4.57236	3.46446	12.1717	2.99182	7.11745	3.69945	6.18912	15.3279
2.47886	3.10991	4.23669	1.95698				2.04532	5.51705	8.77894	6.07335	2.13214	4.10136				2.42488	2.25935	3.5946	4.91584	3.66592	1.73707	2.58967	5.67477	4.72208
1.04962	5.49136	6.72998	9.63906				1.54915	3.69244	4.13878	4.02525	2.63046	3.93708				4.33245	2.6541	2.69802	4.46341	3.10112	6.00054	4.31861	4.41477	2.57662
2.26811	6.81487	2.25213	5.63149				3.14806	2.19716	3.12149	4.5814	3.81274	4.07057				4.24317	6.82712	6.78153	1.62256	3.51024	8.52382	6.64337	2.837	3.95116
2.9835	3.88952	2.77229	2.87028				1.71183	2.90248	5.9068	7.03482	2.73428	2.81423				4.45812	5.1751	2.83103	1.40798	3.71324	6.90217	7.39343	4.74707	5.29235
4.51265	2.18702	8.12087	1.31757				7.92536	2.62815	4.62404	2.00661	2.54328	2.98238				0.843743	2.01662	3.77568	3.37148	1.93111	24.722	3.1651	5.36564	6.24948
4.06012	1.43635	5.27404	2.25409				9.40436	1.62647	3.60168	2.82542	4.80028	2.71846				6.91443	6.84017	5.21666	3.18559	4.13911	11.882	4.19133	10.8099	8.66488
1.67827	3.86515	1.54695	1.72575				8.20204	3.75096	18.6925	4.10176	5.44348	3.38406				0.913254	5.67326	6.35017	8.69754	2.6317	4.01493	5.56748	2.47556	3.28646
2.74056	3.63485	3.561	2.80433				19.7767	5.53831	18.4288	2.9827	4.63054	3.42258				1.80129	3.68192	5.4447	6.18398	4.96074	7.94279	10.1407	3.52042	9.10972
8.19485	2.92701	7.21831	2.36023				2.69328	2.5588	9.09472	2.40345	2.32536	5.89961				2.75207	2.90481	6.66106	3.49777	4.04951	4.29198	2.6638	6.37758	7.29091
3.12308	3.86293	1.36224	8.63838				1.91598	6.48179	11.1645	0.935852	11.3899	2.43487				2.95968	3.99135	4.53192	2.8072	0.712385	1.76165	1.01768	14.814	3.72348
1.67261	4.97737	4.3345	3.05402				3.59153	4.06367	6.22146	5.50405	4.97952	5.50297				6.04666	4.96314	6.30306	6.617	2.36756	5.07163	5.06835	7.47242	8.34279
7.41384	2.80784	10.0103	9.12362				3.09038	6.99227	13.6585	6.68514	1.42314	7.93415				6.01664	2.41379	5.47774	6.80297	9.03346	2.31021	17.8443	12.6916	2.75327
4.34014	3.45128	1.44383	8.73949				11.8167	3.92835	16.3711	3.00896	3.09562	2.27179				2.36528	2.94349	2.02433	3.95258	3.36736	8.6484	1.22248	2.29963	4.04778
1.47459	4.94433	3.30828	6.43056				3.69128	10.2886	10.6455	2.49916	4.28228	3.5545				5.08215	2.95819	9.38627	6.15156	2.48042	5.2837	5.08712	17.3286	2.72498
6.57847	2.54962	2.67182	9.14932				1.7744	10.7179	12.7216	3.65935	5.21074	4.2668				2.69853	3.02987	3.45333	3.44526	6.36404	5.76234	4.74553	11.9746	6.06445
3.0015	5.34462	2.52066	9.92966				3.06752	10.2082	2.63773	3.74367	2.64855	3.3297				5.46419	2.85914	4.8634	3.07	6.08076	1.83894	8.37236	5.44527	3.34844
4.94043	4.58374	2.27578	4.54663				2.06946	5.65525	8.25367	8.21955	2.20524	3.3624				3.90063	5.45731	2.93416	4.34923	0.898111	5.51136	4.0045	5.1799	10.9339
4.69146	3.12995	3.75009	2.62876				1.8706	3.58045	3.26237	6.45195	2.90548	5.47226				5.90209	4.06389	4.11388	4.39507	2.84511	5.56349	3.71096	3.306	8.35143
5.11736	2.60123	7.03167	5.90705				6.32692	8.20173	6.25072	3.1567	7.5255	3.77412				6.66057	1.5325	3.69165	3.43103	4.01632	2.17645	6.70354	4.14594	5.37588
2.51743	4.1061	6.04778	2.80914				1.84383	1.44165	7.10036	2.24012	3.13985	2.81948				7.55759	1.28813	1.19222	8.31602	2.43632	5.08901	3.68539	3.58895	6.3765
12.587	4.33267	3.41195	3.73699				3.10261	3.72337	2.48809	3.21582	4.40203	2.52067				2.48237	2.33926	0.91554	5.21759	2.87616	3.67537	3.33517	2.84344	8.58384
6.59131	2.37532	3.4974	3.98408				2.75661	3.9451	2.3057	6.33007	3.18072	2.25869				3.46815	4.67547	5.19726	2.6377	3.62306	3.93657	4.85853	5.16147	2.47611
1.48532	1.46203	5.99551	13.5368				2.25625	5.35322	4.58976	4.51922	8.44312	2.85644				4.20347	3.23383	5.21261	3.11355	2.46638	4.13527	2.87285	16.3702	6.50179
3.96835	4.1783	3.83306	3.07365				4.17941	5.44097	4.28409	4.10941	3.86916	4.97009				9.86814	2.30131	5.85226	2.38999	3.58183	3.87133	4.54353	2.45048	15.7897
3.68253	3.76041	5.45878	2.95225				6.82294	8.38938	7.74479	4.34839	2.61718	2.38641				6.31207	3.79381	10.1524	7.88925	3.55026	3.02424	6.69996	14.3504	2.90282
23.5452	3.97355	3.97034	1.79776				4.58063	4.90393	13.1218	7.2477	9.76878	2.83176				2.30064	11.0914	4.22808	3.88578	2.03417	2.37777	5.77259	7.14519	6.65726
2.71251	3.51043	5.3973	2.06311				3.47338	8.33917	5.28058	2.62365	3.58312	5.76458				3.46545	3.51797	4.25869	2.41883	1.4061	3.51146	4.82613	3.78185	19.4423
2.08804	3.1319	5.92874	2.57255				3.33773	2.1327	9.64183	4.24794	6.56898	8.24945				2.53356	4.4016	15.2886	2.99118	3.57287	3.55852	4.41783	2.92176	9.53985
4.225	2.30873	4.85843	6.00456				4.98207	12.864	1.5597	3.88712	4.36444	5.08028				3.19773	4.2814	8.77471	4.72357	4.74533	9.93735	8.13057	6.39343	7.10015
4.42265	1.8814	6.43599	6.56527				3.15373	4.8309	2.77921	3.37392	3.08047	3.14554				3.18617	2.08569	5.00896	4.24312	1.76275	5.01215	9.65193	5.64365	10.2757
4.34577	4.00247	3.79561	7.93387				13.4132	2.13845	3.27951	1.81307	6.5756	27.4905				2.92761	4.60896	4.22132	5.44406	2.43097	7.20034	3.76386	6.29564	7.48071
2.82405	3.67946	5.62352	8.6106				2.85973	5.50314	18.2038	4.6433	21.461	11.3501				1.36475	9.76593	2.49229	4.05704	2.89112	4.29123	5.20401	3.71275	6.23867
2.77886	1.55611	2.30325	3.02254				2.88748	3.55453	1.49142	1.86949	10.2743	5.75326				4.65374	3.83466	6.59341	2.63863	4.20412	5.80025	7.3508	5.46984	5.77561
2.58413	3.61431	3.50878	3.2764				6.24215	5.31816	8.83325	6.78677	1.91318	15.7159				2.73326	8.13147	16.2582	4.27878	4.71147	3.49149	1.22023	5.8319	6.11865
2.19042	6.43926	4.82105	4.82613				1.79936	4.04628	6.53824	5.10104	4.18402	5.91117				4.41183	2.9877	15.6495	1.78887	1.75686	12.1118	11.2589	2.59673	4.04927
2.05781	2.12485	4.41268	3.27549				6.32122	7.10311	7.24219	3.07691	3.61928	5.06807				2.87343	4.48481	3.70013	1.55321	2.68404	5.72172	1.7174	11.9861	2.54187
3.85074	4.55131	5.60808	4.01609				3.40463	9.40486	2.12456	4.182	3.53038	1.4645				3.05785	2.67564	4.29977	10.5837	1.67904	2.77862	2.80364	7.33305	4.12013
13.6287	4.54542	8.64755	3.28122				5.64492	6.03326	4.86374	3.80234	1.35829	3.74863				4.03318	6.38651	6.26107	4.03175	1.89264	4.5521	4.42615	4.78598	4.67777
2.96969	6.56295	1.60284	2.13593				3.78744	5.84698	6.69043	3.88216	8.72262	3.92318				2.66494	9.76544	4.12124	3.46263	1.28815	3.53415	4.63297	12.5033	2.66059
4.2791	3.96268	3.84041	5.67903				3.79026	4.9406	3.41048	7.56219	3.30209	6.75892				2.50426	5.05563	4.60072	3.0905	4.47677	2.99403	9.13285	2.26668	4.48803
2.6994	7.57387	2.42728	6.06443				13.2486	4.86986	5.56868	3.27706	2.64094	7.03925				2.62584	4.24403	4.80283	7.46263	7.50443	3.36799	14.1944	6.46032	8.572
10.5506	4.13568	4.15133	5.53615				9.38106	6.40316	6.05582	3.3054	3.43625	4.07356				2.37166	2.36022	5.98376	2.96938	1.19473	6.97027	12.9116	7.14966	3.05021
0.731445	5.94677	3.03675	5.11337				4.8036	2.57239	5.36881	3.74646	5.9596	8.24405				2.68857	5.08466	6.85587	5.42315	3.29001	2.95369	1.64159	3.00552	9.92427
3.31953	7.09149	4.60018	3.3087				2.65363	5.53361	16.6436	5.43995	3.35388	5.81999				3.99649	6.33035	9.18494	3.17194	2.40009	7.28616	4.54569	4.6469	5.10959
30.5268	3.29577	3.17244	7.81533				10.4881	3.90111	4.19463	4.48048	18.8107	5.18631				3.15744	6.00004	1.65698	6.97408	6.01642	9.85602	3.59054	9.41271	2.92947
2.49051	7.70953	3.352	5.92387				6.08644	2.18605	4.70054	3.02984	4.34309	3.21021				2.26106	3.33567	7.58148	7.30607	3.64858	4.14826	5.22334	4.26036	3.53282
3.26687	11.858	4.69712	3.43879				9.61582	19.553	12.9254	6.7174	5.61784	3.88457				2.14624	2.32564	2.63317	5.70774	2.15358	6.04647	4.31291	5.70982	1.11518
5.93092	11.1717	3.60569	16.7775				1.95574	2.98244	6.43084	3.1986	3.07198	2.01815				13.3006	2.14625	2.73444	3.91715	3.37259	10.0594	8.94103	4.21292	7.25282
9.00724	3.27481	6.80654	3.14261				3.71211	4.09611	8.46322	3.49272	7.04019	5.34422				1.60614	2.23844	12.2848	3.95652	2.64613	8.35431	7.38645	4.38952	3.7809
9.92406	3.14205	2.93937	1.84931				3.10132	6.43376	12.5721	4.14647	2.06264	8.081				2.08122	4.14032	18.06	2.36494	2.41056	5.81508	5.22174	3.72433	10.1181
4.52406	4.86629	5.69171	0.652066				3.66626	10.3295	3.81639	5.00389	4.97747	22.5074				2.9066	5.56732	5.24107	4.11068	4.70881	4.74615	4.93676	4.33011	6.96931
3.13169	3.035	5.39027	4.0447				2.83964	5.45264	9.02555	3.77718	3.67746	4.8857				2.75994	6.38014	5.84699	9.67338	3.08656	5.25065	2.2886	10.6436	7.32277
4.91869	2.28067	1.58657	3.10155				5.10282	9.32924	5.99824	4.46496	2.98215	5.98697				5.70897	1.58508	3.58647	3.95413	7.79946	4.67728	11.264	2.67167	6.17977
2.67479	2.49829	5.7823	1.30887				10.4706	4.99351	5.61637	3.71132	5.87886	12.7534				3.82991	2.71338	7.41578	11.9795	3.68953	5.30529	3.62683	6.43023	12.3139
2.89829	4.77937	6.23639	2.85651				3.56545	5.04799	3.17726	3.5935	4.32218	3.714				3.18908	16.7943	4.25624	3.10054	3.14472	2.84733	15.8385	9.81953	6.35011
6.13064	3.07914	3.77713	3.68347				6.60801	8.49536	5.98624	4.14464	2.55126	2.39797				3.52893	18.6144	4.26676	2.59122	1.9968	3.89315	11.756	7.49884	2.46834
1.99976	8.33402	3.24396	4.20048				3.1808	3.20116	3.05171	3.51567	14.1069	7.05919				3.95305	9.24003	1.82907	0.904447	9.71436	15.1661	11.7154	7.75553	1.58593
5.21808	4.72993	4.19699	3.88556				4.68662	11.6712	10.477	5.57057	2.12803	4.62588				4.12753	5.97083	2.86654	3.79167	2.07081	4.10929	10.8909	4.11942	14.4149
2.1281	17.0792	3.03276	4.2346				2.91866	1.38276	8.78757	3.17013	3.04415	6.97501				2.63809	2.59698	3.90838	1.09713	3.77215	7.27141	4.61832	1.29826	3.17775
2.04861	1.74048	4.31306	4.55229				3.79208	6.5575	12.1243	6.33827	9.10265	13.2225				4.49734	4.86614	9.92538	4.51452	2.81538	4.21049	5.04726	8.49757	17.4301
1.70694	4.39947	1.28328	4.67675				4.78564	4.2951	4.0321	3.29971	5.51447	11.9597				5.92115	3.62779	2.50711	1.73146	2.3583	3.16659	7.36231	1.79162	5.53689
4.88541	6.30935	5.61715	6.67752				1.53628	1.05	9.30703	3.38194	4.40562	5.90098				4.46457	6.06906	3.99537	1.41821	2.29375	3.59716	5.30408	9.44724	5.38831
7.58395	6.66426	3.28432	2.74246				4.46851	2.65062	4.49732	2.29696	3.4688	5.82343				5.14341	4.38551	5.95904	2.01892	2.79094	6.3318	6.19908	6.30046	3.59165
5.08	3.61668	7.88407	11.2658				2.03128	2.02624	2.44189	5.98772	4.57188	11.7121				2.86636	2.33573	3.21336	3.49415	2.67527	7.68846	9.91039	2.89638	4.13178
4.31779	5.19258	2.68507	3.86937				4.11671	0.889657	2.80021	1.75737	3.49073	1.93368				9.80775	3.27353	3.9955	3.63893	4.96771	1.96639	8.46042	3.92144	6.30266
2.22286	4.18845	3.18525	7.69623				1.60105	4.07971	5.36111	2.52832	3.79539	15.3894				5.92514	2.5432	4.86374	2.85643	13.0524	11.209	4.2281	9.17555	3.07575
2.80836	4.7804	3.48604	8.09181				9.45937	1.85586	2.98374	14.988	4.07274	11.2387				8.11913	1.73703	3.00329	3.5816	2.95524	1.53718	3.57514	5.37376	3.2683
6.69069	6.96397	3.3966	13.4236				6.2094	3.55094	5.16878	9.40725	5.43391	4.19591				2.30546	5.30831	6.00243	2.85517	2.55974	3.26566	4.0854	7.01112	6.10884
3.31557	15.5892	5.69597	9.52307				3.32446	5.23552	3.83674	4.97103	7.88866	6.69335				1.94001	6.70574	3.34238	3.73261	9.13669	5.84022	4.55641	7.90987	3.04034
11.2491	3.75087	3.84242	6.22537				2.90049	6.92662	2.82847	3.37096	4.43551	6.18117				3.52577	3.74106	7.51865	2.41647	5.17312	7.89662	4.65288	9.46807	7.08074
2.26437	3.85777	5.8235	1.12663				2.69663	3.25673	2.50139	3.13138	2.24498	3.45397				4.95091	3.2619	3.64678	2.64582	11.8732	2.32076	3.15261	4.50497	3.77547
2.30587	7.65225	3.11375	1.47571				3.58614	4.04422	3.18393	3.77891	4.04447	2.65485				3.34915	3.47368	3.07648	4.43809	8.18477	2.92401	4.34833	3.83534	4.69172
7.74804	1.3046	3.7712	3.5189				4.78195	13.8316	4.88141	9.04595	2.55345	6.19525				4.06777	8.61932	4.24625	2.74505	3.06348	6.0955	6.39388	7.28957	24.466
3.21415	4.0259	3.18142	3.63262				4.55745	3.42817	4.55659	2.34409	7.39563	8.27602				2.64959	14.353	5.86451	3.08144	2.52939	4.31196	1.98105	3.21301	5.68301
3.20888	6.38463	5.58698	5.19832				3.22994	2.45217	6.32331	8.18213	1.78331	3.83776				2.43271	3.71947	2.9464	3.96362	2.9858	3.11623	10.4186	8.96396	6.32679
3.31555	10.9783	9.84973	3.09549				15.3526	10.041	2.63993	4.42793	8.17774	11.9672				4.42265	3.68931	2.3085	2.79054	1.93231	2.5891	7.44291	4.99956	8.44191
23.6241	1.39835	2.67235	4.51853				2.10765	2.72545	3.90928	8.88584	1.40541	5.80354				4.04344	2.72198	2.11816	6.11188	2.48347	14.3706	4.33621	3.93221	2.52213
3.19146	3.78659	16.8982	4.82054				2.98733	3.558	3.63684	4.30413	6.32819	11.0312				3.94899	11.3514	3.67033	3.69865	2.70485	5.37554	1.81118	5.41773	3.83178
3.57897	3.52834	7.06665	2.97123				2.37167	6.45059	2.78468	4.12318	1.85268	14.0121				4.27245	3.3414	3.72353	3.04386	2.88202	3.36569	4.6909	4.59846	3.08412
3.65546	4.77876	4.96543	8.71246				2.85269	13.2393	3.7791	4.74901	8.12799	2.09384				3.63585	2.94327	1.94337	5.42495	4.34783	2.94667	3.38236	6.86169	7.35709
2.9107	4.13837	1.89561	9.81804				2.19754	6.67735	1.90168	3.99608	3.22902	5.91795				3.15928	11.1029	6.36541	1.95633	1.30775	14.8564	9.06873	2.58069	3.68086
11.081	5.17829	2.71536	4.12627				3.18545	5.51193	8.74044	5.09094	7.04357	9.63935				2.4932	3.40054	5.4221	2.52428	2.74243	4.6586	3.53188	5.11175	4.78035
3.6268	4.28977	1.94165	7.136				2.29102	3.72715	4.21137	4.83245	5.41997	2.65626				3.00908	3.58502	3.61638	7.43934	4.12869	9.18486	11.1415	3.673	5.76056
3.29143	3.55571	1.69793	2.39082				1.27776	6.08503	4.11282	5.15842	4.79772	2.85517				1.83783	2.43984	4.20352	1.85123	4.10385	3.12618	1.63791	3.4454	2.1064
3.41786	13.4399	4.97404	16.5046				1.85197	3.96853	1.82567	8.68289	2.7276	10.561				15.1507	2.8367	3.50113	10.0701	5.10374	7.66627	3.69112	6.33368	3.27891
2.99269	2.90229	3.73041	3.08676				3.7601	3.59498	10.7868	6.17036	4.88844	2.90172				2.08169	1.00703	4.39911	1.2358	4.99115	7.39715	3.89436	5.00879	3.16749
3.02746	4.4668	4.72328	1.78293				7.49515	6.921	3.70374	5.53886	3.65747	4.30389				7.13769	6.51701	3.68556	5.19207	3.60874	2.18168	6.64541	10.5428	5.16849
6.86671	7.01945	4.11709	13.2647				4.80887	4.10652	0.760436	2.57413	5.92191	5.68652				2.48002	3.68742	4.6329	1.51325	1.67865	2.59758	5.09577	5.891	4.91143
2.2441	5.07921	2.87299	1.73752				6.61657	4.10122	3.37041	2.12251	4.88875	5.523				1.99966	3.25494	3.11279	3.68131	2.35347	6.75672	4.93406	4.85384	4.64379
2.16482	1.64928	3.70935	9.75208				2.97401	4.45453	5.17827	4.51593	1.6919	6.87529				3.09182	8.29557	4.69951	3.44353	4.44013	6.01004	6.16524	4.86416	4.58518
3.23449	1.57922	7.07899	4.30431				3.47681	4.65686	8.7895	3.7346	12.6281	3.17123				3.41689	4.18257	9.415	3.89217	1.89772	4.71747	2.72207	4.6644	7.97723
3.11372	7.62936	4.57415	3.12156				13.1601	9.2553	2.23407	5.2307	4.07709	3.64103				5.10481	2.8341	6.26796	5.11801	4.04349	5.14292	5.13398	3.9602	10.2615
3.89199	11.6683	12.2327	4.99296				10.3075	2.17719	5.44715	3.07642	7.59629	4.65922				3.80836	5.45784	13.1342	2.98348	0.55822	4.66439	2.94566	4.19217	4.60651
3.53109	8.28304	4.22669	10.18				3.80319	7.15355	5.48831	3.18878	9.89026	9.00272				2.93731	1.61937	1.86523	3.83886	1.87741	3.95252	11.2603	14.8093	6.40799
3.60438	10.2336	2.14467	3.40354				7.89857	4.15908	5.88253	3.18064	1.98468	3.78739				4.07626	7.63981	4.83215	4.98394	3.59399	4.40066	7.85699	7.29575	8.99096
12.73	15.0681	3.6243	3.32698				5.94057	6.70411	5.18114	3.88495	1.74671	8.38808				4.92963	3.42604	4.49292	8.7919	2.63554	5.4892	6.99498	4.25391	7.07226
1.51904	11.7178	3.72127	1.61404				2.59528	4.32182	2.53034	4.24265	2.1149	3.85469				9.81993	17.6359	2.17564	2.81919	2.82075	5.1827	6.31981	14.2449	10.9255
5.2046	3.05838	5.07743	11.6251				2.16271	4.2206	5.53164	4.77435	2.79064	2.59326				9.14749	4.06554	5.28515	4.64776	2.63937	3.47611	2.83953	6.41692	2.19347
4.63803	2.12925	2.61452	7.02068				20.5363	4.35974	5.01941	2.13597	5.29607	2.45879				3.37129	5.26401	10.0962	3.66753	2.30772	3.66971	6.76235	19.1317	2.78037
0.484105	2.38903	8.10141	3.37299				1.82859	9.18977	2.35216	2.72896	5.36446	3.18588				4.47207	2.94579	6.88173	2.83494	3.12117	5.18949	3.76965	2.64087	5.92549
18.016	17.3889	4.27986	3.16815				13.9845	2.77931	2.86308	3.16937	3.0975	3.26358				6.1284	4.00624	6.58925	2.4585	5.68794	3.84509	4.82124	3.08796	3.57273
29.2492	4.20645	2.44871	1.52288				5.32365	8.53295	6.41273	10.2179	11.484	3.91115				1.41249	3.59743	5.3008	2.29734	2.27482	3.09339	6.9919	3.83098	10.2257
3.67807	2.78065	34.1086	3.44368				6.88808	3.76994	5.71753	2.28701	11.1236	5.99595				3.66248	7.79099	2.97756	3.84454	5.84906	5.13297	8.40716	3.69786	6.54901
3.65081	4.97621	6.67908	3.28145				2.65853	4.71216	3.92582	8.83449	1.77966	5.32423				6.06196	1.45787	3.95134	2.91549	2.31817	2.94567	3.381	2.84894	5.65191
4.85805	7.82858	3.45321	7.71164				9.25094	3.35721	4.57726	3.56439	26.2476	3.77998				3.48553	5.38281	5.7455	2.91286	4.09292	7.32508	3.75466	4.67582	7.4777
13.9172	3.3118	3.76089	2.77544				2.74023	4.40866	8.05522	4.23525	4.38088	8.69573				4.46023	2.96097	3.092	3.32621	4.18708	3.19382	1.90038	3.32226	1.89105
4.7425	3.94052	2.8933	4.78888				2.50101	5.82066	2.79368	2.99356	4.02477	5.94419				3.63902	5.11517	5.81909	4.96277	3.13279	4.88147	5.22897	6.39596	3.1543
4.76157	2.5479	5.22212	3.03042				4.84184	7.52986	2.77381	5.04523	2.29256	4.24904				4.83445	11.0306	4.23412	2.95958	11.2733	3.45499	24.4999	4.01017	4.6498
4.55963	3.76055	9.69011	3.9736				1.88801	6.35011	1.82347	3.31092	1.31527	12.5262				7.02121	3.3211	10.0413	2.00517	4.20786	6.0588	5.59877	3.23165	2.21914
1.87619	3.10529	2.82474	2.01261				1.42324	8.23016	4.00789	5.68116	2.73081	6.84273				3.24296	5.88477	5.50798	3.68554	13.8277	5.63981	6.91911	2.6527	10.8466
2.29581	5.37508	3.79778	4.82269				2.98717	1.55967	7.19959	3.02278	2.26582	2.71121				1.5744	4.57385	3.08481	1.61739	2.28048	5.2496	2.48637	3.59987	4.38741
3.77615	8.99843	5.29939	2.12193				4.42436	4.40237	2.52664	8.34948	4.03976	2.38317				2.33425	2.25405	5.06409	5.24049	3.3758	4.73527	3.43243	1.40249	7.42174
3.3164	2.64124	6.04176	1.76926				2.81204	4.52757	4.19508	6.49822	7.10774	6.01311				11.8677	2.24885	6.34279	3.31949	1.04149	3.3121	4.80243	2.93764	9.7275
3.37892	5.79729	2.86609	3.51133				4.21383	4.79004	1.99777	4.58834	4.97655	3.58256				1.12752	4.53405	2.55481	3.22735	5.30554	4.83673	4.93706	3.88764	20.6379
2.72035	5.93703	4.03977	2.26828				5.23719	2.15118	4.05559	3.63502	1.77793	7.23544				2.0507	3.31355	9.7499	5.40568	3.551	13.1634	8.01085	6.7889	3.82287
4.46289	4.14736	2.6851	10.6337				4.06455	12.3865	8.87162	4.19214	9.91439	4.20363				3.01935	3.23277	3.25763	3.78631	2.83657	4.06653	4.17805	5.39208	2.98789
2.84058	4.51394	6.60785	4.05903				2.38678	3.07196	3.21441	3.92649	4.57178	6.3314				11.1368	11.3694	3.02166	3.43521	4.53215	9.72688	4.77499	2.90339	6.0534
3.03321	4.72662	1.95943	3.08384				4.63868	2.43236	4.1458	6.88782	21.8183	1.83024				1.90561	10.2067	3.99394	3.88521	3.57065	26.6388	2.96833	3.18106	3.16872
3.78918	5.63461	6.93839	2.39414				13.6262	6.66646	3.78454	5.06993	4.63609	12.6714				3.26226	2.40441	2.49077	3.27674	8.22517	10.3316	5.18377	5.35807	6.74091
2.7499	4.31095	3.89322	5.15654				4.59957	7.64036	2.74088	4.59006	10.3057	4.90166				8.10754	2.76274	4.45408	2.95949	2.61988	4.70036	1.6567	3.99951	4.09325
3.58716	8.76732	5.29377	11.8327				4.88148	3.76904	3.80545	5.27881	11.8016	4.49599				5.51991	3.64811	5.77814	3.68905	2.05984	10.9046	3.00245	4.4711	3.48604
8.78551	11.3157	4.00958	2.37359				2.01226	4.7388	6.02318	3.63582	1.81867	13.1764				2.26575	9.31702	4.41488	3.50346	4.13836	3.7291	4.5033	3.30242	3.1746
14.4719	5.32327	6.7406	10.1774				2.19278	4.22189	4.15841	11.5943	1.24001	4.05516				6.95859	6.74558	3.28696	5.56853	1.10485	2.8345	4.68472	2.65975	5.18775
7.21569	3.59621	6.26937	7.67405				7.68125	4.21365	7.69579	5.25274	3.07694	14.0867				3.49647	23.118	9.82931	5.14371	5.4841	4.5836	2.01152	10.6415	7.84432
2.56776	2.63925	4.95297	9.20404				10.3618	4.54055	8.65451	2.98872	9.4139	10.3015				1.67272	6.43326	2.69719	3.25801	5.66438	13.1657	5.08764	11.5829	4.07554
2.45185	3.06371	2.72875	2.26759				8.10631	3.14535	5.22676	6.77187	5.48007	5.29015				5.18968	4.31986	6.63021	2.73902	5.99386	4.46071	11.5149	15.3764	2.02098
4.34582	5.5636	4.78566	2.9671				5.00334	5.95584	5.79161	2.3283	2.51697	2.33456				5.5693	2.92809	2.20812	3.15233	3.21273	3.17247	13.5015	6.52884	2.48974
5.09671	2.82835	2.87194	6.21414				3.40589	4.69739	12.7885	21.9121	3.81589	8.55262				2.58895	3.42001	3.06512	7.7273	5.17935	19.4972	2.10612	9.14482	5.0743
4.319	3.42519	6.51198	7.80077				20.9754	7.73113	5.39898	5.56078	5.28056	4.38678				4.00124	8.57171	2.30843	5.32724	2.48555	5.19908	1.62477	7.07063	1.81933
12.9139	5.42613	3.74224	8.53254				5.56702	6.04453	1.23599	6.30465	6.46689	3.48005				1.8683	5.61982	5.61626	2.54354	2.35127	3.90277	4.42881	3.22311	5.92873
1.64826	5.948	3.40944	4.53082				3.28378	3.99636	4.55814	4.50872	6.6019	6.63826				1.31891	4.06168	3.37081	2.14473	7.37154	2.82298	8.66391	9.34763	6.1654
10.2851	3.56638	2.66599	2.05386				1.81345	3.34641	4.62269	1.19238	14.434	3.19208				1.42457	1.90983	1.01279	2.37547	4.59399	5.2829	4.0061	8.12373	6.05895
10.1942	3.76554	4.06136	5.18069				2.83895	4.50005	7.44004	3.36581	5.27711	5.08975				4.33463	1.04604	3.0269	2.37731	2.60857	2.66051	8.04503	14.1467	3.52598
7.74479	5.77634	5.92762	3.06251				1.94774	7.95785	3.51232	2.78065	9.24688	6.08346				3.10078	2.34118	3.17332	23.3619	1.64486	6.40854	9.59165	4.14347	2.21524
2.28611	3.392	3.20146	22.8913				1.52467	4.18867	2.38344	29.0512	8.59663	6.62011				3.69074	6.68272	5.15033	4.58422	3.37732	18.3583	4.3841	4.35363	5.16837
2.39475	3.51988	6.43943	8.50706				2.86963	3.55653	4.21672	3.88078	3.22844	7.56356				2.73838	1.23446	9.05562	3.57935	3.07952	1.13077	3.78094	5.78798	7.56687
2.15123	12.2077	5.08608	4.01565				2.57295	3.12189	1.44718	3.62711	5.7272	4.08858				2.50266	2.11311	4.49602	3.84072	4.6724	4.696	4.91898	4.06912	4.77653
3.24635	3.38392	3.80238	9.98059				3.91869	3.64631	7.43953	3.53265	2.44704	3.09661				2.19558	2.99639	8.44663	3.21258	1.9695	6.32362	3.81366	8.27612	11.8109
1.9718	0.973827	2.92443	3.95052				3.31745	4.98062	3.45398	2.88531	12.2308	6.85436				5.27223	5.55905	2.10301	2.37194	5.07249	6.53777	7.44105	2.91235	2.64233
4.5269	12.4124	3.60775	8.05301				9.751	3.70687	5.05935	7.62835	5.86345	4.15773				3.92429	3.64995	5.72034	3.52546	2.63913	1.80779	4.60684	3.30953	3.05497
4.04951	2.33323	3.61086	11.0492				3.20987	2.83334	7.02961	6.97774	2.82999	2.82459				4.213	3.5253	4.81678	6.85061	3.79414	3.0619	8.45839	2.80132	8.79132
3.30864	2.91997	13.17	5.61497				2.42776	3.58513	2.62538	3.94412	3.31248	1.9705				3.1028	3.76607	3.10048	3.99394	10.3889	4.927	5.97689	8.37434	6.35635
3.33637	4.25933	8.62359	1.723				11.935	3.90741	4.16045	11.5757	2.97269	2.65935				3.35892	4.27727	10.1505	2.36111	7.22084	2.77627	6.21379	5.82262	4.06991
3.37369	1.3446	1.40787	9.51768				7.02169	3.83557	4.59008	4.03975	4.90749	2.59034				4.71189	2.70913	5.47342	3.49618	3.5534	3.12284	10.3482	6.46915	5.06018
3.65076	5.67153	4.81059	7.67129				7.14115	4.77627	7.83361	2.02049	2.98865	3.71244				5.41821	4.17282	3.03895	6.30268	4.29844	4.01351	4.9595	3.46685	4.17489
12.4543	3.64963	2.49082	2.75532				3.39198	4.68155	4.86116	2.76308	4.1029	3.10436				1.03519	2.9951	1.49363	1.05196	3.1416	8.31587	4.27527	2.82759	6.72929
3.42494	3.5022	2.87435	2.28704				3.5472	3.63679	3.37065	2.35383	9.30644	7.58123				4.02938	3.03775	4.30774	3.08294	1.10695	4.82861	4.61559	6.09699	4.20248
0.963907	3.82021	7.99296	0.941404				3.74478	3.75333	3.00668	2.43995	11.9939	5.37781				4.43903	4.1547	4.26695	4.63643	3.67777	13.6425	4.32515	8.68888	3.27921
10.9256	3.20979	8.61916	7.89402				4.52526	5.4544	9.88863	3.32352	4.41833	2.92649				14.344	3.27952	5.38453	9.79404	1.45547	1.84152	4.12716	3.81553	2.8507
2.40165	3.2145	5.31995	28.2947				2.7124	9.21138	3.14054	5.69649	6.2801	6.78621				3.2076	6.20363	3.83138	3.18347	2.62126	15.4943	9.08153	3.48748	3.13548
3.76777	4.18366	6.27312	3.68115				2.37858	11.983	6.89516	6.25355	1.87254	3.66917				0.952355	2.33747	5.24521	3.74519	2.08137	3.75372	4.67284	5.91211	3.01148
4.6926	7.95651	4.89954	4.099				1.30231	9.85297	10.173	4.81804	4.14195	4.10784				2.3543	4.93404	6.52096	1.64619	3.48721	3.53557	1.90216	3.82441	2.68318
13.3559	8.37843	3.84507	3.6493				10.9316	3.07295	27.1581	2.81322	3.91641	1.60043				1.36721	9.1	5.45432	2.85156	3.09798	4.02766	3.65087	25.8968	9.70537
1.9784	11.6297	4.77675	8.61181				2.47199	8.92391	2.97488	3.78219	9.1363	14.9104				2.55118	3.72108	3.90919	6.03051	4.01151	6.71351	10.4771	12.0486	5.73058
4.27053	3.66582	2.88466	10.153				11.5288	3.16491	3.14132	1.5551	1.09285	5.40691				4.95306	4.07176	3.46674	1.63888	2.02438	12.4919	8.4605	3.75553	5.4276
4.34717	5.52013	6.32997	7.89062				1.76461	8.88612	4.47831	3.7877	5.87333	4.68927				3.1707	4.91003	4.65054	25.8116	2.84585	8.8152	19.1485	3.18322	8.29549
2.95764	7.16775	8.37894	3.46821				2.41398	2.58582	6.39899	1.51891	2.67056	4.73715				4.397	2.68068	4.74469	2.72763	6.85517	9.64549	3.01658	19.2136	6.93769
2.69037	2.34819	7.20002	4.81409				15.5613	3.31939	3.65572	7.23123	14.0214	4.91985				2.35112	3.10789	2.74143	3.96651	4.33793	2.99414	3.55487	19.2542	4.8151
3.91651	2.11859	1.99032	3.14581				15.8329	3.72966	5.58847	9.55808	3.73366	2.95208				8.15657	7.83616	4.61256	3.28438	2.8975	4.16512	1.38058	3.55998	5.89002
2.14737	2.8353	7.50349	5.22312				2.59079	4.84041	3.28291	2.74341	3.85321	8.13696				2.9752	3.13761	1.34054	3.74627	4.86493	20.9121	2.34552	3.8434	2.1157
3.25825	4.13273	4.20032	4.13915				2.65362	3.86721	3.34387	3.52955	3.62475	1.01241				3.81218	2.9905	5.51165	3.75898	1.78374	2.65957	5.50244	5.82557	4.72596
2.9226	1.31523	6.37828	5.2256				3.33342	4.00826	2.39032	3.2723	1.89643	7.41881				7.28286	2.87276	2.37024	2.16444	8.07165	13.8017	24.3159	6.91329	1.99561
2.39268	8.91964	3.73195	4.84068				2.6826	6.1527	2.62356	3.1492	4.01041	6.34038				15.4781	5.42158	3.11454	8.04909	2.49397	18.4265	10.8945	8.35745	7.23568
2.81116	14.3122	3.68491	3.11002				3.69148	4.6293	3.24159	2.83294	3.85046	4.07521				3.08787	12.1748	6.93651	4.40612	2.24841	14.6197	4.49587	4.41632	4.18338
4.06606	4.86959	5.2375	26.1228				2.27064	6.4109	9.95329	6.92223	3.72686	5.99164				6.4755	3.33654	5.38699	4.78471	15.0326	6.38599	4.7657	3.17531	2.77094
6.77875	10.0693	4.67376	3.29495				5.15778	9.07949	3.24674	4.11175	6.37523	4.71209				2.73098	11.1245	3.61674	4.2658	1.99015	5.9771	4.80875	8.14833	7.24958
3.68758	2.57625	4.03393	3.07458				2.23584	4.7938	1.82422	5.104	8.97427	10.033				4.58848	2.32312	5.41293	2.82425	4.31587	4.50542	1.77132	3.09165	4.6102
1.56151	5.18303	3.08395	2.89928				2.38397	4.19563	3.3096	4.52321	3.87625	5.52371				4.33993	3.42966	7.79016	4.51323	11.068	4.14454	2.76393	18.7413	6.39781
10.7186	11.0603	3.52854	3.69971				3.13927	9.48102	6.12557	6.23933	3.95732	2.46999				26.9813	3.64967	2.45553	2.99347	3.54558	4.79916	3.05157	5.43511	6.37794
3.19912	4.74506	3.19408	2.86088				3.01769	7.68588	1.10633	6.44018	3.48707	4.25793				5.31696	2.68719	4.67146	6.74692	0.510112	3.5271	5.70162	8.73733	4.57776
2.44083	9.59886	2.9111	3.38489				5.17931	7.29904	3.03127	4.29736	2.46225	3.80053				1.29987	4.2505	5.85095	3.18131	1.43807	3.67043	3.48882	10.1264	4.75081
12.1411	2.85592	3.29725	9.55383				2.72929	8.40586	3.9409	3.84426	10.3892	3.64793				1.46753	8.44719	12.1822	2.85876	4.38002	4.41812	4.73462	4.88981	3.37054
12.0982	5.55723	6.44309	3.0551				2.33149	11.3147	2.97991	3.80287	2.21048	23.5589				4.08964	3.02489	6.81192	2.84007	3.57304	8.46183	6.99809	7.75748	5.15107
4.80811	14.2476	4.74962	3.10085				9.62744	5.17282	5.21431	3.0456	1.92297	2.89185				2.19813	2.41713	2.3011	2.77644	2.70787	11.4463	4.37341	3.99118	12.8599
4.69719	11.2134	2.38637	3.75261				1.69078	10.9222	6.02019	2.70927	6.42668	3.09409				4.13525	3.91855	4.77696	3.42249	3.12026	4.0463	9.7038	2.68569	13.6017
2.39483	3.81873	2.94315	5.55879				2.88717	4.59438	6.33351	7.19184	3.47597	3.83863				1.77612	2.68652	1.58651	5.19066	4.67485	14.5056	4.7476	6.99689	7.12556
8.86289	3.01249	5.57201	2.82077				9.89499	5.82114	4.14941	11.1651	5.72214	7.77561				3.05658	5.23316	1.91509	6.01573	3.28516	0.973573	4.89008	3.1155	3.91633
18.0572	3.70137	2.17685	6.01151				2.1123	5.73875	4.97754	1.65662	7.63786	6.41795				3.92702	2.91574	7.34719	5.66297	4.14483	6.58683	5.29785	5.50218	3.07404
7.03824	2.56162	6.99878	2.46345				2.59838	4.55585	6.3997	12.2802	7.15365	10.2145				3.74662	3.09224	3.55664	24.8133	6.63631	7.15332	2.65511	7.97955	6.2226
9.93385	6.03738	2.60361	1.81818				4.44234	6.78576	13.0278	9.57911	2.58552	3.98167				2.43152	17.4145	5.33999	2.47941	8.82392	9.37962	3.35961	5.86667	1.97879
4.07823	8.59838	3.40338	10.8343				3.28333	2.92423	2.91986	6.32088	9.34193	4.47198				4.42438	2.68074	4.00007	1.77695	5.69081	7.33427	3.79817	2.54784	4.92217
5.56817	2.0757	3.15584	3.45947				3.06359	5.77155	12.1911	4.34837	2.78112	3.65228				2.86461	4.26684	4.33377	3.93554	2.3708	3.01072	2.65398	6.59988	5.78088
1.70673	3.29874	5.0593	3.92714				3.78571	3.18157	9.11358	6.6573	2.82619	3.83887				4.83153	4.55427	7.1355	6.17181	4.26534	3.34401	3.54354	7.25384	6.01873
12.9362	3.31752	1.65549	5.16685				4.35128	5.13646	4.97751	3.72917	6.66373	3.62475				4.51291	4.9956	6.66831	2.96059	5.23398	4.68855	5.3697	5.29565	20.7942
5.6315	8.9907	3.09223	10.5284				8.11363	3.14801	3.83299	1.81766	3.18634	4.72943				6.03206	3.6199	7.81196	4.81219	10.1457	4.32124	4.20841	4.53549	3.22
7.41014	2.78923	1.97374	2.65669				4.037	6.21517	3.36929	2.69871	9.95372	2.729				11.6192	3.56421	4.88611	4.37759	2.13846	3.78868	2.84701	5.57613	5.25131
4.8406	6.04326	2.54984	4.12618				2.90677	1.72766	0.82508	2.70158	2.65462	2.66585				30.7011	2.36104	3.3311	3.42958	3.13988	1.66662	5.40053	3.45167	9.89233
3.13196	16.1005	3.24188	4.20091				3.52251	2.29255	2.66749	4.12593	3.65211	9.08861				2.61587	3.03907	4.98868	5.4881	2.47367	4.17755	4.62814	2.30006	6.62969
3.3681	10.4017	5.64332	11.4149				5.54946	13.8562	4.87107	3.30897	1.42377	11.1194				4.73239	5.45165	2.63877	5.3516	3.56325	3.40369	7.71474	2.97191	8.3948
8.83032	6.40226	3.69604	2.26747				1.97621	5.18473	24.7357	2.92489	2.39914	3.47401				1.46457	2.32423	8.42838	3.60434	0.972398	11.9845	4.03859	2.07152	6.77502
3.81866	20.443	3.95546	3.75894				3.40241	5.41165	5.11202	8.93465	7.07003	3.29656				13.0088	2.79089	3.73697	5.72362	3.08815	5.02174	7.83326	5.06424	6.81098
5.66094	3.11041	4.09751	4.0255				7.6413	5.62271	3.96565	7.99916	12.1496	8.53693				2.65261	6.05295	3.47722	4.35455	2.67081	4.3656	1.92015	10.7126	16.3355
3.35387	3.12879	9.02719	2.66947				6.10438	4.53278	5.04516	2.99752	3.33367	6.98461				4.37365	2.68821	1.65175	2.66185	2.14557	2.88306	5.96522	2.13531	5.32741
6.46497	6.13189	5.32182	6.62998				2.07118	4.86988	9.71398	8.43287	4.70589	1.4387				2.64703	4.42917	1.5996	4.18619	2.21269	5.56526	17.718	9.07219	9.32785
1.54055	4.46126	4.81102	4.59213				6.49936	3.14488	2.84338	4.22553	3.20103	3.67561				3.4713	4.83149	10.5544	3.66823	2.1091	2.99489	9.34541	5.15815	4.73804
3.8745	4.54836	4.1696	4.39766				22.4581	2.71856	5.77331	3.97645	3.38479	4.94275				2.90312	3.48638	3.29924	4.2932	4.41707	6.16168	5.14119	2.90158	3.16911
2.43427	5.50696	5.51103	2.54489				9.31558	5.22717	3.67191	5.41876	3.55345	4.1727				3.37757	3.86048	5.40704	5.39233	1.67867	7.27243	2.99163	9.42334	2.62895
1.94235	2.71483	5.10481	3.35521				4.15303	3.61355	4.47765	5.17435	2.61797	4.01398				11.9086	3.48867	6.51762	7.55554	4.13407	4.72996	7.97824	5.32382	2.80933
2.9161	6.35964	3.00536	1.63317				2.94582	3.42384	2.06888	3.23466	2.73646	4.85215				14.2906	2.45344	2.47195	3.63121	3.13374	3.74185	6.4657	4.15179	7.86709
2.73086	7.90131	15.688	3.65056				12.4221	2.55371	2.88304	5.08802	4.88513	3.43355				6.9129	2.20122	3.61166	4.86885	1.62254	5.37687	4.25323	11.961	4.04582
7.07375	3.32209	8.64239	1.62202				3.7205	6.84888	1.94295	5.84409	10.7697	9.5965				3.34364	7.14029	5.20301	2.22462	2.34905	7.97709	2.91883	2.99904	5.97527
2.582	5.21051	2.97436	2.55016				2.65393	6.53866	4.28986	8.06835	4.11825	4.88016				4.51286	3.30153	3.52758	1.70921	2.88414	4.25268	3.67737	4.79771	4.75481
1.58972	10.1829	12.3337	3.69694				4.59384	3.17691	8.88982	6.88012	3.8309	3.57846				6.879	3.54238	3.44313	3.22046	2.28828	9.04741	4.77228	2.00339	7.5598
4.19995	4.42583	16.5672	6.33387				4.34736	3.84931	13.1024	4.46779	4.68457	5.03936				9.33201	3.31689	12.555	7.13117	7.86783	2.42611	5.44101	3.03005	2.142
3.08094	4.75569	6.54809	4.45472				4.412	2.30814	7.14404	7.89713	3.85019	7.22453				7.34595	3.11586	5.85127	1.58942	1.92042	5.71841	3.38135	4.43705	12.2731
25.9751	13.175	8.18471	6.23698				1.93324	6.43438	4.0626	4.19343	2.34488	3.123				2.24829	3.96344	14.4474	4.3125	4.20181	6.744	5.99012	14.7051	2.63362
8.12852	2.83031	13.478	5.31137				3.74979	2.73021	2.69782	4.05777	8.62048	3.65739				2.50759	3.47565	5.64379	3.9989	5.13967	8.3364	10.4939	3.40775	12.3389
11.6529	1.01861	4.91462	5.84693				3.20587	7.45292	3.08706	1.72023	4.35546	4.57281				7.09512	3.48017	3.3369	3.60739	1.35022	11.8715	2.65313	2.48184	6.51845
3.3906	8.08745	5.70654	7.44548				3.53239	2.21572	4.12468	1.71675	2.07547	1.3658				10.8234	2.07644	1.85203	3.2513	1.4911	4.98611	5.62166	12.3676	13.0126
1.97994	4.94143	3.09705	5.26503				17.1847	4.83297	5.71968	3.92422	5.36926	5.76327				2.85386	3.04024	4.2507	6.7595	3.20508	7.52334	5.32586	11.115	4.34454
5.52453	1.43016	0.863419	4.61498				4.41106	1.32844	6.5365	5.60708	3.02207	2.07699				11.7333	2.69277	4.34047	3.07668	1.86154	3.09415	8.20068	5.00062	13.6315
2.24231	1.74565	8.80189	3.09051				3.62743	4.17444	8.53386	11.469	1.51566	5.94335				5.11074	2.85971	4.76284	2.7294	2.50007	1.67413	1.68835	1.91785	7.759
4.46387	2.82821	4.51968	3.58135				3.10778	6.00438	8.73086	3.74545	2.57283	10.7407				2.36764	11.2801	4.97659	2.8335	1.79755	7.41747	11.6453	9.30584	6.37368
3.2643	5.23224	4.45641	2.36945				4.40626	2.98907	2.19137	12.1482	3.32812	3.69449				7.04883	5.79554	3.83901	5.94662	1.69111	4.03261	5.2709	9.14787	3.59739
12.2586	6.72618	2.83723	2.44734				5.29336	4.62648	7.84883	3.71182	5.84276	6.65355				3.9862	12.3022	6.08182	6.59048	3.1083	10.1061	1.99584	4.48011	3.92486
2.48127	4.31585	3.90543	3.99435				4.9077	4.77251	10.7358	4.39804	3.46707	6.52357				4.17903	3.30219	4.41365	5.19867	2.50662	3.58091	6.88483	9.44522	4.99509
3.27586	4.09862	0.948176	6.83672				2.76372	1.31661	4.8346	2.51277	4.39949	9.65886				3.6604	3.92867	2.87778	4.18399	3.68289	6.61715	6.2377	2.00744	7.73222
11.0081	4.12266	3.70657	10.5127				5.64826	6.59725	5.64298	4.88674	2.4823	6.27164				2.82917	7.91353	2.97682	6.41403	2.45944	4.03269	2.99373	4.19581	8.25451
5.07415	3.3847	5.05765	1.41644				10.5299	11.6464	2.57438	4.81723	4.99188	3.84108				4.57447	2.79119	5.57878	2.18953	4.02278	3.69033	2.65365	10.7755	2.3786
1.91411	2.9506	4.73941	18.0358				4.06927	3.28899	4.18911	5.06369	3.95886	3.96626				4.61095	3.05203	6.04287	3.50406	2.38159	12.7838	6.9256	3.25114	5.98664
2.74373	5.21494	2.85399	2.2748				5.27007	4.6708	9.38335	2.30175	4.03794	18.7678				2.32147	3.19788	5.23053	2.95792	2.41901	8.27463	3.36023	8.2678	4.1245
3.86064	2.50477	4.74245	7.66709				6.73756	3.52048	1.70199	2.23612	1.79934	5.01473				8.87694	9.68806	4.25893	2.82622	3.14621	9.02117	3.07837	6.66831	2.33723
5.59602	4.15443	3.27754	4.15142				1.36184	6.58582	8.67826	2.99663	7.13093	3.53216				9.50711	2.78424	4.93743	4.35707	2.97383	7.41519	2.00256	3.96604	4.46369
4.83804	2.83484	5.61618	2.72801				9.14491	3.64382	8.08317	3.5017	3.12821	11.4609				1.51338	6.17967	4.96207	3.04562	1.9769	4.3839	2.127	3.86415	5.06287
3.80279	4.63861	6.02454	3.04444				7.44266	4.90848	1.97483	3.63197	1.70514	9.15305				3.801	2.99426	3.51319	2.3033	4.36989	3.08095	4.10043	3.0323	4.33048
1.45549	1.7713	4.20619	7.03275				20.0346	5.5405	0.561501	6.47128	3.28387	8.66709				4.81232	4.55729	4.55938	3.10533	2.78163	4.22936	8.02609	2.75178	3.56617
2.82141	2.54594	1.94922	2.54178				8.35322	6.06793	3.50212	5.54862	3.48418	5.76249				4.86421	5.02161	4.64538	6.08232	5.15548	3.63736	1.0527	4.47375	12.0311
7.08247	14.1423	6.88928	3.50326				1.76422	4.39486	2.47643	12.3719	2.69749	20.5031				1.86456	7.36224	1.92388	2.47974	4.04265	17.816	2.01533	20.2323	2.82264
7.56482	2.02901	5.49983	5.61854				11.1632	2.85461	2.99832	4.55954	5.6586	5.31224				4.02865	14.1541	4.22959	4.0093	2.44885	2.8295	4.5583	4.76619	6.70153
3.07753	4.01389	3.26143	4.3541				6.42398	5.27964	10.8675	4.739	10.3322	21.2973				3.13908	9.79697	6.57464	2.45332	1.75239	5.20805	4.93902	14.6741	4.78849
2.20659	2.30455	4.85914	4.63497				2.82941	4.57245	5.04492	9.75145	6.43341	1.15813				3.79422	2.62334	5.65231	3.24922	1.83939	3.61056	1.46684	19.9965	1.99501
3.29847	13.849	3.31627	2.25093				3.15542	5.21513	3.06948	9.42126	5.58205	5.18039				1.29663	5.16268	5.89091	5.18495	2.5933	4.28981	5.86933	1.43414	2.20888
3.56432	5.29229	3.4645	4.20185				5.87368	6.81647	3.27181	3.71546	6.33	4.45029				3.09302	1.6849	5.20749	4.35692	0.815276	8.84499	4.21466	16.0257	4.19333
2.88416	4.75546	2.48537	4.93467				2.19667	4.29282	4.44034	2.55879	14.9325	6.12604				4.58478	3.5289	4.57476	3.41744	1.74652	2.35026	4.8608	3.23397	4.10123
2.65053	4.75579	2.99226	2.89282				3.39242	5.14584	4.71402	4.34535	9.28296	16.7686				5.1306	3.76413	4.71365	2.72134	3.0425	8.90482	9.08898	3.77113	15.1235
3.0785	8.31484	5.31017	3.97382				10.77	2.82483	9.01721	16.6597	3.53	13.335				4.43243	2.50888	10.8447	3.69124	3.40799	2.11182	4.08258	8.78562	2.99145
3.89296	5.01625	3.8425	11.0696				3.83678	6.83574	10.1233	5.85571	1.52577	13.4616				3.07671	3.09425	3.91095	2.09403	2.46825	4.45441	6.52125	3.98095	8.08085
2.45134	10.1346	3.11328	2.91601				4.83384	4.53242	4.59506	4.17452	2.43687	4.04171				7.21278	10.9781	12.5041	2.32899	2.15807	4.38785	4.73876	3.89976	2.48666
5.01198	6.80893	2.21328	4.39579				5.99036	6.85301	7.19018	1.48662	3.77822	5.85586				9.24967	12.744	3.79664	2.65782	3.90798	6.60774	4.8978	4.43939	2.76783
2.57827	4.20427	3.29985	4.60803				8.24618	6.25015	6.3122	1.82087	7.71858	5.5261				2.82153	4.40856	2.31169	1.88175	5.12716	8.64004	4.16814	3.74012	0.868452
5.85556	4.65905	2.04753	3.31631				6.20832	5.58259	9.72074	4.56248	3.69394	5.7389				2.99675	3.47208	2.04941	1.24629	9.81566	4.84236	4.11369	6.70511	2.72186
5.21731	5.36924	3.64653	8.51842				18.4248	4.85847	4.61916	2.93796	5.98277	3.24128				8.64301	6.95479	16.5058	3.65264	1.73166	4.10277	5.03486	3.36964	2.96884
12.8282	3.62511	4.62183	3.47412				15.8868	2.48386	4.38255	12.8794	3.70136	2.90062				3.23391	3.54175	3.79896	3.92972	3.07983	3.32978	4.15406	5.02356	11.4633
3.13921	4.36647	2.25355	3.1557				6.67977	4.88971	3.7914	2.88376	5.61225	4.33061				8.82218	3.69412	9.79733	3.07096	6.33988	5.62381	8.80915	3.8832	3.59512
4.63424	3.34595	3.75125	12.5625				8.22777	4.53397	2.81237	1.97164	4.90249	2.90536				7.67696	2.8909	5.03521	2.53929	2.3177	7.82042	4.13332	6.20279	4.0996
6.3245	10.3506	6.49006	2.94636				1.89046	4.96891	10.1458	6.27093	6.26481	3.09493				2.60036	3.93491	5.10038	3.17267	2.75858	6.75807	4.08646	3.3438	5.94179
3.45659	9.41829	5.49956	11.8603				3.51597	4.7588	2.81243	2.85224	2.33155	8.29494				1.8135	2.13292	4.49486	3.75598	5.52707	2.20774	5.90045	10.9075	3.193
14.4006	6.2441	3.97848	2.41071				4.2908	5.05856	5.74044	5.05873	3.77675	4.26424				3.06044	10.6601	3.53159	3.73121	10.6127	8.7066	5.62747	6.94448	3.91704
3.07636	2.58014	4.09717	3.65285				4.33293	2.60577	7.90063	4.65988	2.51261	3.13265				0.43842	1.73524	3.87642	3.84543	4.99564	4.45994	4.66974	3.40688	4.65652
2.17138	9.29424	3.19921	1.81946				14.2079	2.97312	5.40906	3.50167	5.92479	5.43842				10.0582	6.32884	4.25495	2.0488	10.9911	3.2601	6.58204	9.02945	6.12839
4.67942	2.06076	1.76357	5.96744				10.2276	3.54686	4.13361	7.22798	4.38882	4.10818				3.65306	9.61034	3.96201	3.89195	7.19629	3.2143	14.0252	2.22024	5.59116
2.81313	3.39929	3.28644	7.9063				4.45797	4.64736	3.84709	3.9056	4.14064	3.92786				4.15653	3.82665	3.27078	6.44614	5.90347	4.45044	2.19426	3.94535	6.66589
6.80742	3.76329	4.38003	6.44817				8.99511	2.72436	1.04262	3.59954	4.33017	3.5253				3.69355	4.58423	6.9663	4.0327	10.9123	2.99654	4.99313	6.54276	0.664185
4.11967	8.52603	3.92217	5.26084				3.86271	5.15312	14.6112	5.60672	3.41503	10.9059				3.05708	3.62789	4.1636	5.06256	4.10924	7.46502	2.6282	6.15822	37.7395
2.82981	3.06523	2.06422	4.22154				3.00987	2.76335	6.70106	4.41492	3.43268	2.08432				6.14238	4.8198	4.12564	5.52897	7.17452	4.39749	2.34547	7.14508	6.91557
4.41588	5.94181	4.54642	30.3495				3.25422	4.83586	4.62917	2.83918	3.16581	6.21797				2.86152	3.93793	2.51669	1.87329	2.46253	7.46979	1.0804	6.55566	8.55133
1.66315	2.66199	3.39552	2.33036				5.54383	9.47671	2.87727	2.98337	3.31813	9.4021				2.69838	3.90283	4.36215	3.26914	10.1476	6.24211	3.26058	4.42854	2.6305
2.05267	3.80046	4.2295	3.11946				3.41207	2.03988	2.37657	5.00135	2.42334	3.34911				4.87066	2.90423	2.26663	3.90786	3.98315	15.0848	10.9989	3.08504	9.44686
4.62433	6.06298	1.90314	2.74569				6.29104	7.23877	6.33042	3.37164	6.39444	5.73098				3.60438	3.94256	4.87225	3.27713	5.90093	7.45553	2.50322	2.98661	2.48297
0.523419	7.21402	5.03667	1.82615				11.6417	6.96843	3.35883	4.49089	4.39857	3.07542				2.34847	4.21266	2.45639	4.40632	4.52969	6.94858	2.91755	4.55239	7.90189
2.57402	6.59977	3.48335	4.82737				5.4213	8.7712	4.5587	3.49814	11.5272	7.90758				3.04876	3.5814	6.97534	3.43621	2.7308	5.33382	4.01108	8.83289	3.48457
4.01978	2.47107	5.96326	4.02744				9.15225	5.01688	4.07211	3.87512	5.24175	6.14775				4.45457	18.0905	6.08648	3.01343	3.39945	7.48209	5.21091	4.78331	4.15673
5.03707	2.30037	6.51766	7.75524				2.69292	6.13991	9.67044	13.9016	6.78679	5.1753				6.18511	3.57009	5.08923	2.52836	2.87371	3.15159	7.95579	4.92957	3.84939
3.00478	2.46558	3.23237	2.24392				3.26806	7.1328	3.34388	2.20613	1.18928	6.0756				6.00384	3.72054	2.57569	4.86564	3.4154	3.32407	3.91341	6.91619	7.66712
3.20975	3.78853	5.91461	31.0954				4.01774	4.12044	5.83708	4.12995	5.96312	3.55698				3.27175	3.34046	6.65139	5.41336	3.58323	5.03371	4.64441	1.61538	2.81948
4.43784	4.10879	1.21366	2.92218				4.61429	6.62321	17.7185	3.2871	3.55055	8.3155				5.84923	4.25475	5.0025	3.1013	3.75966	4.15129	3.66437	0.87842	3.1411
4.63816	3.36599	3.41491	8.80775				1.81949	5.68259	2.82212	9.21617	6.96253	8.85234				2.42648	2.91981	6.70688	3.73702	3.02334	3.5916	3.52677	2.33083	6.89877
2.95623	10.7689	7.03941	6.06468				2.64644	3.29144	3.95441	11.7112	2.90147	7.28239				5.0916	2.18053	6.06189	2.22098	2.17841	4.37985	4.91836	7.62446	4.60545
4.93385	8.65627	3.45623	19.5898				3.45681	5.58723	4.41867	3.32448	3.62667	4.10514				2.91829	2.56152	17.6577	2.34577	3.94827	10.844	3.56561	2.17096	2.18032
3.64864	12.8543	3.70629	3.62752				4.6735	2.68052	3.75655	4.8532	2.81772	3.20812				3.45922	3.35413	1.79369	8.81365	2.24696	9.46416	3.27649	17.9478	5.68364
1.68203	3.87274	3.83297	5.73846				3.31031	4.22146	4.37618	4.8311	8.07077	4.3662				2.76078	7.77451	2.43539	3.09862	1.73339	6.59747	3.0561	4.86967	21.9625
2.0006	2.70299	10.5876	9.2078				2.43561	5.15799	9.08368	4.21609	3.1862	7.45957				2.2365	4.17985	3.9065	10.8043	3.9696	7.71371	4.35908	1.15881	4.98318
2.06552	4.32355	4.8493	3.69691				9.94821	3.68116	3.87432	2.815	4.93597	3.23148				2.51367	2.48347	5.64652	4.11184	2.90447	6.22594	3.14163	6.81816	4.52454
12.442	6.12983	3.41771	5.22558				7.00902	3.45412	3.73607	3.28152	3.00118	3.53831				8.54998	18.8685	3.71952	2.3734	2.22213	3.91525	9.08158	4.82892	1.83746
3.81097	17.5089	5.0029	4.09816				2.08663	3.1707	4.39005	3.74608	4.47456	12.3621				8.67279	4.71905	3.80044	3.58398	4.0706	3.97615	2.21254	5.39862	2.01378
2.09473	4.31578	5.46845	2.56965				10.8389	5.79254	3.86478	8.28749	5.65883	5.25627				7.82627	3.15371	5.3849	3.00293	2.99166	2.76851	6.36014	7.27264	7.64248
4.12427	9.25222	9.31366	4.62515				3.35039	12.1752	2.881	4.20573	4.35137	4.91168				2.00161	4.99563	33.8091	2.7093	1.79412	5.0286	2.16552	11.7701	4.23818
1.61804	4.30565	3.07819	10.2919				4.31479	2.19172	5.4683	7.91067	3.17621	6.56473				2.27402	7.86499	9.69783	2.65231	1.67363	19.6947	5.07167	2.58493	4.12118
2.79956	5.07592	6.29337	4.69011				12.3595	4.14055	2.68672	4.41653	1.81577	5.09736				0.600286	6.61757	1.58162	2.975	2.46084	1.57193	3.53164	6.96627	4.85792
2.57382	6.09057	4.24956	9.63927				4.08456	6.73562	2.25021	3.35079	3.81737	5.40978				8.25978	13.3684	17.6399	3.65576	16.0211	5.47476	6.11098	3.47406	5.70018
4.68281	3.45833	3.33311	4.47179				2.17423	6.50311	3.81748	2.47996	3.83119	4.25627				4.01801	1.81177	4.87943	7.3632	3.39847	10.5714	2.9782	3.57737	6.09766
2.56624	6.09577	1.91475	2.06304				3.63122	8.95879	2.95616	4.3058	3.49946	2.63788				3.45263	3.67859	3.93866	3.23837	2.3235	9.64269	5.55955	2.00851	4.97348
2.83979	2.42384	5.01464	2.80197				2.16756	14.197	5.13307	5.87338	8.14344	3.03351				3.68924	3.16969	4.7025	7.92795	1.69825	4.00737	3.70567	12.5355	3.52649
4.53275	4.48945	3.79278	16.799				3.39499	9.34351	3.52518	4.30748	3.12983	3.61167				3.92873	7.55741	5.01249	20.4042	3.44687	6.37266	4.09233	6.26633	7.96699
4.28596	4.6174	6.42553	3.20221				2.26667	3.56013	4.38351	4.46266	5.33329	5.62405				3.90864	5.90913	8.66539	3.81038	2.63575	11.1011	7.18262	4.75608	8.90856
2.9071	14.4487	3.16575	6.67617				6.22112	11.0153	6.01363	4.15062	7.54251	3.09236				2.23551	5.67556	4.45155	4.26889	7.43517	3.20136	5.97337	5.77754	2.2498
1.56882	16.6753	4.62202	5.42086				5.6608	5.49477	11.5952	1.10441	2.91715	2.79607				4.06756	1.93408	4.58603	3.32071	3.76962	7.35949	3.02503	4.81903	5.41619
3.1064	7.71002	6.59658	2.80434				3.61826	5.40242	7.37715	4.53113	1.71779	3.67127				6.31223	2.19579	4.49089	4.5892	3.22677	8.0571	7.004	1.94464	4.02537
3.10056	3.16455	4.19251	1.23213				4.88277	5.88297	7.21289	11.7291	3.84339	3.03459				7.59918	3.52668	5.68934	2.16214	4.51768	1.14547	5.68222	2.05141	17.1556
2.56352	3.69017	2.75913	12.3248				10.3422	3.18111	1.94684	1.92965	4.94339	2.91381				4.80893	8.18529	4.84678	2.62301	2.37099	14.012	5.31194	16.2649	12.8582
8.63801	6.86069	3.87264	2.12386				7.80003	9.66899	4.22177	3.2329	1.53484	10.1937				2.03627	4.07466	5.12415	5.88586	2.32781	19.431	3.39961	1.69734	17.3969
3.82244	6.97287	3.91704	2.72739				1.55196	2.29109	5.5055	6.58574	4.04871	10.7721				3.54405	3.98755	5.14716	5.56642	2.82098	6.45051	2.95443	4.12813	2.76346
3.57816	8.2327	1.88771	3.75253				5.50055	9.53288	4.06717	3.31884	2.84511	6.23188				2.99471	3.16132	8.59716	4.32713	2.47175	3.97969	8.67491	3.96487	4.62118
4.11502	0.913202	2.72919	10.7585				5.84298	6.67325	3.60965	7.35431	1.38246	4.05024				4.54879	4.3108	4.19573	5.13498	7.40452	2.97653	4.15282	3.9425	10.949
7.71406	0.975022	4.82998	4.54138				11.5304	9.49649	3.17147	2.27544	23.755	2.27916				3.50486	2.20173	3.16226	3.63638	5.09951	4.7067	7.76182	4.32556	2.53481
2.11342	1.99977	2.54722	3.63452				0.973129	5.08448	10.8839	6.85027	6.46576	4.09178				5.12694	3.78694	3.53433	3.22997	2.68064	4.76842	2.45967	10.2555	4.21443
6.71984	3.19488	10.0584	5.21064				5.21799	7.68043	5.5567	2.89483	4.21066	1.53934				3.64623	3.62285	3.02541	8.28891	3.10187	4.27076	3.03494	5.61782	3.9813
3.20153	4.11197	4.001	3.3163				4.18872	3.24495	1.66112	3.49167	4.69631	5.74007				5.81446	6.17712	13.3912	5.23099	4.5284	14.3661	16.0414	5.41647	7.57562
2.60341	3.69187	5.17061	4.89484				4.16278	7.42865	2.90546	10.5463	3.29972	3.63298				5.3786	4.54906	2.02376	3.98037	3.86171	2.55365	3.97892	3.23001	17.2244
1.10614	7.02634	1.09854	17.9052				2.89436	7.47632	3.87523	1.46826	6.21135	1.70712				1.74957	6.47317	3.18703	5.75114	3.28544	11.6404	22.8561	4.40047	4.21941
4.44192	7.90679	6.04056	6.35052				4.12745	2.83931	14.322	4.19457	3.87851	9.3581				2.71117	9.45602	5.59629	3.42014	3.51601	7.52783	8.08952	2.32084	5.79862
1.64769	3.83316	2.05261	2.25562				2.99035	3.75852	5.71425	4.35184	12.3661	3.10488				3.32097	1.82342	3.25519	4.67713	2.6648	6.36652	8.87597	3.46016	3.77773
5.76769	4.86563	12.0279	2.30317				2.40365	3.0257	7.46447	3.55603	4.75491	5.53879				4.39386	10.0997	6.52175	3.8362	1.89439	3.65241	13.7938	14.2056	5.54201
1.93302	8.1057	14.9537	20.1531				2.11789	3.48583	11.0613	5.49211	6.67138	5.64026				5.9215	3.11722	5.37625	5.76445	2.8474	5.86022	6.00706	4.40365	4.00171
1.97267	2.40331	6.67915	7.50708				7.85931	1.71095	6.05336	2.76959	5.0806	18.9907				3.61141	3.86532	5.7511	1.64395	2.12027	15.3762	8.41034	4.18231	7.1107
3.38436	6.71803	3.4059	18.4319				3.68732	6.62756	7.10838	3.85049	1.38074	6.19179				2.39327	7.48263	4.06949	8.18624	2.27875	5.45791	2.95588	5.59043	6.01325
3.40629	3.86423	2.77852	10.3244				8.07715	18.1308	3.762	2.89317	3.83009	22.8814				1.47599	6.82557	5.21965	9.68522	5.74991	6.15449	2.78071	2.70745	4.30789
3.05827	0.835673	4.61012	2.05523				5.86463	4.10542	3.92862	3.33539	4.74024	3.09479				1.41348	4.12265	4.64552	2.64848	4.76012	6.38737	4.06782	4.61144	3.71217
2.71992	3.01109	3.19201	2.96228				5.98332	2.97296	4.60361	4.04727	7.43469	4.75697				5.02716	1.69756	6.59588	2.83009	3.21246	11.0138	4.22804	6.72349	10.2391
2.61917	2.85245	4.11371	1.77191				8.39772	4.32244	1.5301	4.69635	3.31952	5.05389				2.17951	3.6936	7.05191	5.07783	2.51309	2.45895	4.35125	4.01825	6.29682
2.80838	4.5635	4.30836	1.92229				8.09779	3.55288	3.9259	5.05754	9.12462	3.96848				10.6488	4.97975	8.43687	10.3011	5.96595	4.00591	2.77665	5.71938	5.77635
3.33503	2.74378	3.80826	2.57358				20.9579	4.2278	3.68571	4.93396	7.15788	3.80622				5.35476	3.54004	11.6404	3.05856	8.21398	2.57965	5.35141	7.55086	11.9851
5.99039	3.62761	6.27448	5.636				3.67515	3.12498	4.7364	4.80131	2.00106	2.31293				7.81015	1.74396	4.67062	3.20529	13.6701	2.08864	7.07674	3.82003	2.83846
3.06852	3.65138	8.2237	3.32149				2.69184	3.97202	1.95221	5.61352	5.1198	4.16744				2.94432	4.74008	4.04713	3.03129	14.9728	12.2383	3.05058	7.29644	17.4421
3.81358	2.73135	6.3424	5.59858				5.14076	7.80732	2.87421	5.51542	8.84051	6.15376				3.19519	6.99831	7.51766	2.99618	1.99761	3.58222	4.14517	4.43855	6.24825
2.57393	5.71538	4.28267	4.84604				5.50487	1.81666	6.25297	2.13683	3.03102	3.49869				4.63026	2.45455	3.49404	4.41368	2.76065	3.83171	10.5181	2.90316	7.06099
2.67667	1.87544	2.33671	4.8932				1.73867	7.1587	12.0978	5.42197	4.67932	14.2131				3.61016	2.676	4.48263	4.7372	4.91183	6.40031	3.23625	9.76312	8.13687
4.6007	4.099	6.39569	2.80627				4.10982	9.32174	5.85256	3.20777	4.22449	4.09023				3.19875	3.73504	4.16904	3.30559	2.10827	7.20786	7.92272	17.1155	8.70124
3.66788	2.86343	3.44945	4.98828				6.41358	4.23455	3.91348	12.2064	6.40452	3.02945				7.10168	3.04038	3.17745	2.84466	5.51089	5.50896	5.07246	2.84854	3.31964
1.98549	2.63773	3.10974	11.4957				12.5329	2.25907	3.386	1.31345	12.4082	5.96726				4.15573	2.10366	6.82571	3.92526	3.10028	3.91541	2.2461	14.5135	4.64827
2.50447	2.7508	4.62956	5.63937				3.21801	3.0787	9.65492	2.3267	7.10218	8.05923				4.11197	2.70131	4.14493	2.86085	5.16849	4.24454	3.5036	3.8133	7.65894
1.91683	5.61031	2.13641	7.01946				4.39225	6.49993	4.42716	2.6353	6.05379	3.59054				4.70614	4.5051	2.75424	1.85161	3.41613	6.06231	3.39805	7.35666	4.32556
4.10696	2.97047	3.43386	6.24879				2.51962	20.3903	4.82671	3.16344	7.87625	1.83238				2.30995	3.89726	8.25683	2.07092	1.95093	3.15199	6.33281	6.43489	3.29897
1.69196	2.8438	2.58729	5.92386				3.10774	10.3519	4.84642	4.79803	2.00135	4.31266				20.0993	7.64436	2.25831	4.53323	3.4488	6.36916	4.34703	4.40442	4.08175
3.19667	3.324	3.83147	3.49414				3.20245	2.95256	3.76963	8.23063	6.87052	6.37746				8.22426	4.95057	4.30146	3.94168	1.28842	2.42594	7.57249	4.53403	5.72989
1.7214	1.82926	3.14683	3.55327				9.39388	6.41504	4.96726	9.45	3.06944	4.21799				4.46705	4.19059	3.97834	3.3035	8.52357	2.91063	4.70092	1.80447	3.41716
16.1408	11.2537	4.07641	9.11476				2.78445	3.03027	8.14422	5.78818	2.69495	10.7103				2.52779	4.47624	10.6017	2.58075	3.20466	9.63755	2.11317	2.14349	4.40264
4.37638	5.33404	4.09779	6.47488				9.0572	6.27615	4.22125	4.79139	3.13839	4.16197				3.55378	2.12667	5.34152	2.54068	7.08618	6.09509	5.79201	3.28901	11.4064
6.89341	4.35581	5.22539	3.97442				3.93056	5.5336	8.41371	10.3761	8.73802	1.78027				10.2367	3.09702	5.42441	7.60016	1.31295	6.71742	16.7403	3.65673	5.95345
2.17102	5.85438	3.02766	3.28875				4.70136	1.86611	10.7164	9.55815	3.67365	4.97999				2.04424	4.47427	4.73376	1.85818	1.39439	12.5666	7.85132	1.97983	2.79016
9.94849	5.9748	8.54781	3.47925				2.25492	2.23115	3.25116	6.52195	2.57467	6.66926				2.52679	2.1973	4.12727	4.37658	6.4566	7.02804	6.64281	6.85137	2.41343
1.47453	4.43114	3.66784	1.96964				2.45654	3.37808	12.2592	3.75106	2.44173	2.9242				3.00612	3.13565	5.09993	2.10653	4.41198	14.7897	5.69845	5.66763	3.47564
2.2132	14.6862	5.67083	3.46933				5.28895	5.01007	3.18318	3.01313	5.03545	4.22929				2.88301	3.25837	24.1427	2.3385	4.09015	6.25884	2.85734	4.45014	2.21194
3.14211	2.37272	11.25	3.11667				13.9422	12.9792	3.45656	3.79997	3.20535	4.77061				5.74352	4.35649	10.5704	2.55602	2.77737	4.77932	3.34306	9.71535	14.5606
5.01475	16.624	3.50023	5.19906				6.78697	31.0665	4.16557	4.43661	4.01465	8.76835				3.83329	7.87558	6.23774	12.3585	4.74401	4.84018	9.31221	5.51928	2.29727
3.15643	1.89867	5.93033	6.68596				4.92808	4.95816	3.39802	4.87362	4.47177	3.07432				13.788	7.0019	4.01633	3.81086	8.43052	4.97349	1.75125	2.84053	5.57871
3.85627	11.4504	2.53124	2.33974				3.0557	4.01708	2.6354	3.2447	5.97938	9.32364				2.4987	2.96995	9.08081	9.29484	2.60781	7.73411	3.8329	3.77309	5.12296
2.39327	9.68543	2.02429	14.2259				7.79502	3.48232	7.08792	5.484	6.90156	3.34367				13.5564	9.10959	7.12483	12.7381	3.2946	10.2627	2.34938	4.90225	4.16309
1.56481	5.38126	4.46988	4.75153				2.15031	3.57929	4.48224	4.42776	10.0811	4.17566				7.88022	4.29919	3.47475	5.24227	1.64774	3.0226	4.45961	14.508	5.96737
2.03229	2.55133	5.99596	3.26951				10.1942	5.12147	3.04588	3.06088	5.48019	5.25456				4.10028	8.2731	3.4508	5.24243	8.66153	3.6226	4.4457	5.84461	6.6846
2.66908	8.38994	3.37272	7.48862				2.05148	4.3619	4.31785	4.68091	7.53862	4.36639				3.93212	4.19995	8.58117	2.73482	10.4782	6.11376	6.99469	8.94394	4.5051
4.55633	4.36218	5.54026	5.44065				2.42729	3.45777	5.66292	4.32012	4.99698	5.17112				6.03501	3.72249	8.73672	1.59687	13.4378	4.8054	5.0466	3.82181	4.28768
3.37472	6.88908	4.19995	4.52132				3.38851	4.36013	7.28495	3.43728	3.49088	8.26813				5.85175	3.6949	7.01119	2.52966	2.19801	9.20787	1.79361	2.76758	2.60458
3.19754	5.25986	1.93626	1.53403				2.32725	3.84292	0.838071	2.90596	4.55907	3.29786				5.05156	2.34085	3.37795	3.85173	3.08321	3.77452	1.34051	2.21336	3.08149
2.45619	5.14251	2.95173	3.19696				5.16299	10.4177	3.51528	9.43586	1.99301	4.53299				4.05569	3.5119	4.13133	3.44051	2.5322	3.60234	16.8293	10.9654	21.4744
3.04419	3.66717	1.36826	4.27846				8.59643	3.56258	4.66455	7.9939	4.1251	10.7357				2.39878	3.44846	6.52712	4.36156	3.06087	5.21578	3.22477	7.99934	4.64874
4.49265	8.5957	3.4808	5.51312				4.15016	5.98959	6.43087	3.28364	8.9044	8.45252				2.9097	5.70001	7.5672	4.1825	6.31048	9.1749	4.71958	4.27182	1.90669
3.77292	1.717	3.35446	5.27815				3.80959	2.58451	4.03664	2.25931	3.37595	2.64002				4.89251	9.86185	1.71094	2.14528	2.59717	6.34764	3.23441	1.62601	6.60072
1.98053	3.08519	3.16523	2.35104				3.46162	9.5487	4.14777	2.53605	4.05268	5.4516				4.77187	2.23205	2.53284	7.96059	1.03217	3.43098	4.7946	3.6377	4.69133
8.06846	6.54062	5.824	2.34372				7.46465	7.34892	3.59622	7.56297	3.38813	20.4268				4.57366	3.53359	4.60451	3.67284	3.0627	3.77726	3.45442	3.8585	4.01847
4.0637	4.17993	5.37295	11.4646				1.73711	2.14348	4.65093	2.35611	3.81714	19.3563				3.2527	2.51248	5.90962	5.76656	2.66888	7.13299	3.79965	5.46659	9.403
2.98365	1.92773	3.14811	4.36259				11.5533	5.19868	2.68775	3.07953	2.453	4.10282				4.20463	4.00907	6.31267	4.23489	2.24331	8.20769	6.43467	2.78458	11.2637
3.88015	12.9626	3.36452	3.72861				6.6532	4.16847	6.00023	5.51252	3.19025	2.84313				7.55329	3.87597	7.63082	4.31034	4.89876	5.20166	2.38973	13.9167	3.17709
12.4051	3.83674	3.33986	5.48901				2.85503	5.52256	3.97712	5.66354	4.40308	3.44562				3.86926	5.56561	3.67026	5.28725	4.97658	7.14424	5.28208	4.99346	5.31367
9.37101	2.79553	3.75909	2.76493				18.9619	3.1127	15.1641	9.04014	2.30625	11.0983				3.76034	4.64143	10.8136	2.5928	2.45366	3.98801	8.4718	4.17493	2.62338
21.8512	3.7788	3.08612	8.86202				4.4217	5.39721	2.83689	4.00725	13.4789	3.04851				13.1819	5.71967	5.25489	3.85404	2.23621	1.80785	3.75794	6.78098	9.25236
5.71916	3.02485	4.19155	3.64317				2.4664	3.78154	1.26876	2.05611	2.31252	3.93141				2.96728	2.84408	6.31779	5.2908	5.01326	4.50277	2.27664	2.6958	2.48092
15.8638	11.0159	4.42237	3.10193				4.45626	3.56963	2.58017	3.8493	8.36058	5.26979				2.44375	3.23447	6.48491	3.88969	3.04463	3.05616	2.29585	12.1312	3.58743
2.72096	9.90813	3.47859	2.91375				6.57952	7.75812	13.8508	4.62697	3.43343	3.85491				3.95551	8.56569	8.77063	3.16246	11.7562	2.93408	3.7094	4.27776	5.04192
2.60896	3.01441	6.48404	3.8237				3.28561	4.97048	15.0994	4.03816	4.02446	7.8793				3.14322	3.09301	5.76863	3.01377	3.4103	1.69869	12.0196	4.05624	2.87239
3.17439	4.92031	4.58571	4.20321				4.10558	4.25645	3.87243	1.52082	4.75435	9.84973				3.45687	6.73401	5.86699	5.30671	3.91098	4.37506	2.51282	4.61321	5.70609
3.18838	3.08022	3.48396	8.29207				3.13431	4.44464	3.38708	2.89715	4.38198	2.87804				2.80875	11.2831	3.61434	5.43472	1.8792	5.09952	2.25302	3.52703	3.70076
2.72121	4.94874	2.72185	3.64647				12.9491	2.94816	2.25812	0.686455	7.37728	15.5061				5.72872	7.03065	7.78844	3.90241	5.68547	3.07343	3.90352	8.03538	4.21996
6.41563	3.02274	2.6812	1.51436				2.13185	1.83357	3.76002	6.27278	3.40856	13.4909				3.34298	5.2271	3.26	2.89662	2.25478	4.77808	8.00868	5.9247	4.17215
4.47761	1.47935	3.87538	2.62281				10.1442	9.74611	6.77946	0.906295	3.53594	2.54934				2.36739	3.42342	6.02646	3.55113	3.61589	6.59906	14.7947	7.20188	3.28688
2.60727	5.30541	3.92398	4.51169				4.09247	3.64752	3.76813	3.37958	10.2834	3.32017				11.1341	9.11226	4.27945	3.50938	2.87632	18.5109	3.35611	2.24937	2.4054
2.48755	3.82624	2.60231	13.1075				2.79445	11.8222	4.76417	5.7069	3.59461	4.68141				2.78521	5.37415	10.8684	4.13753	2.63865	2.92399	8.1969	3.77161	4.90337
3.89216	3.1343	4.35594	2.79584				4.0682	5.59869	3.40617	4.42141	4.63174	19.9256				2.86248	4.64269	4.34697	3.45753	17.2124	8.08171	2.60524	6.07211	12.2879
1.84742	5.59937	3.01856	6.70622				12.1413	2.6834	2.20336	5.09902	4.34804	10.387				4.34068	18.8189	2.89294	5.22568	2.58563	3.06323	4.34802	3.49881	5.30183
2.69249	2.55022	9.48979	2.5691				3.01881	4.68958	8.41721	2.25027	5.24642	4.33258				3.95745	28.9899	4.15252	7.14966	2.16805	10.8014	3.77117	5.88781	4.16909
2.39648	3.80388	2.53878	6.19014				1.50325	7.6884	3.0359	4.4205	3.49135	1.56948				6.42942	1.87389	6.0337	3.09012	3.44183	5.43508	9.29265	5.29017	3.28148
2.75945	5.42186	8.55242	3.85099				14.9586	2.37898	2.58322	5.75415	12.5955	4.35928				4.83085	4.09838	4.43779	3.83365	3.70631	4.77038	6.22289	3.44493	2.38717
10.5233	4.55402	2.88367	3.75445				3.73501	4.43123	4.07705	5.32658	13.1356	8.24012				2.46393	2.92733	4.66078	2.26625	3.08313	3.42451	18.6046	3.43584	8.5887
5.38319	3.32143	9.06082	3.25516				16.5154	5.19463	4.61929	6.23421	5.65545	3.81439				1.60001	2.98926	5.63663	3.73465	2.77761	9.83388	3.81158	6.72686	3.48839
2.52099	6.40411	5.28722	3.63794				2.59644	4.23384	8.19388	3.77385	4.4234	4.31583				2.1257	5.24504	1.85844	3.22265	5.29341	3.69336	2.86501	5.09618	2.61241
4.89013	7.60189	2.17204	4.35274				1.03358	3.33083	2.46698	2.38563	3.35699	4.06419				2.89752	3.64662	3.1362	6.20214	1.88448	9.64094	6.64726	11.3842	4.48312
5.53298	1.16885	4.27059	4.38474				2.8002	5.42996	3.76918	2.62105	10.9277	2.73395				16.369	4.39418	2.98782	3.83604	2.43211	13.0354	3.25864	1.70461	3.56817
2.06538	2.9062	2.49267	2.40639				2.97648	6.62461	5.06568	3.89259	2.92095	4.4429				3.99967	4.39813	5.65675	2.71515	1.41356	2.95929	3.28206	4.9037	3.32184
1.20428	18.6704	2.03073	2.40574				3.62875	1.92541	2.12561	2.8477	4.15006	3.8135				1.88994	6.44141	4.52058	1.37527	1.37251	8.12135	2.39176	5.55923	12.5636
5.99531	3.43916	3.45322	6.53507				2.81179	7.69984	4.2804	2.88068	3.74342	3.41847				2.12062	18.6269	6.27984	2.74462	13.2402	8.62562	3.58874	7.4842	4.55953
1.15868	3.86168	4.83383	3.41532				3.72171	5.05168	5.52568	5.45111	3.3194	2.46355				2.38135	6.1535	1.65227	4.06045	21.2184	11.1115	3.01735	6.55777	5.02939
1.3767	4.93986	2.35009	3.10453				3.41632	11.3774	7.26125	4.87814	3.47926	4.51861				4.07201	6.57996	4.30654	2.53787	7.96406	7.94449	4.83508	7.25739	8.13801
2.46753	5.34387	2.58718	2.92165				2.51694	4.43356	4.56836	4.03187	3.22451	5.71918				3.17851	2.07313	4.36166	2.13674	4.13322	6.70602	3.88353	3.62067	4.12942
5.26843	1.69624	1.73884	1.9897				5.125	4.44907	2.56725	2.89895	7.58617	11.6157				8.18682	3.17534	3.5133	1.50968	9.85263	3.70961	7.52071	2.1834	11.817
2.86466	2.96803	3.90124	2.04687				2.11486	7.27991	6.32715	3.25883	2.8321	4.25292				1.88897	7.47834	3.13635	3.41952	9.99333	8.80278	4.65992	3.31208	5.80803
2.85464	3.82239	2.01861	3.00819				7.16146	3.04955	3.81764	3.09002	11.7384	9.1155				8.57307	2.08753	5.48135	3.47304	3.28339	4.41087	4.58187	5.43531	2.9091
2.84267	2.96446	3.17723	7.28545				2.75807	4.78448	5.60254	10.3069	1.9709	5.46265				3.4083	1.73247	3.60616	4.74977	6.12129	12.8635	4.57719	3.1348	2.38134
2.36624	3.3817	1.55064	4.01063				2.28588	3.75701	5.52777	2.2988	2.42547	11.826				1.00241	2.21388	3.81818	11.8785	2.37448	5.51786	5.93386	6.64228	8.145
3.4228	3.21307	2.47185	4.80983				2.51882	8.67943	5.92944	3.09363	7.19429	8.54974				2.67035	3.25633	3.93637	3.52748	3.39331	4.77977	3.32186	4.30414	9.07949
3.71806	3.04662	4.24916	3.44515				4.9233	3.97134	5.35175	1.88207	7.19022	11.1385				3.58757	1.68405	2.66803	5.82071	4.59973	4.4842	4.4973	5.33074	5.62137
4.8721	5.39801	12.2415	8.7064				2.31078	3.73039	2.0394	6.61952	1.18021	1.5962				4.34183	6.5997	4.38536	4.08527	3.6965	1.29085	3.71875	7.30582	1.82291
3.65162	1.99458	3.49693	5.43896				1.80552	6.48868	2.12259	2.83709	9.79551	3.6087				3.63358	2.10477	4.97021	4.05957	1.57471	2.56864	5.172	3.49126	11.8089
5.14491	4.46421	3.30223	7.93188				3.1591	6.7616	17.6857	9.34646	3.55664	4.48958				2.55392	4.93477	2.04023	6.10984	2.32741	14.6398	3.65965	3.07312	3.09079
3.16788	7.17288	3.97304	4.81985				4.7222	4.44101	1.43065	7.12564	3.82164	4.18179				2.32037	3.15073	5.46949	3.58676	4.94156	4.92101	4.57106	4.02338	1.98314
4.1218	7.84004	1.15133	5.30581				18.9079	4.52613	5.24816	3.84216	4.61639	7.46171				7.03991	3.5471	4.85368	3.3991	18.3253	8.70526	3.38133	2.42996	7.56199
2.48604	2.85493	16.8039	2.76982				18.7815	2.94889	3.62534	1.19416	3.36347	3.56355				5.58454	2.1259	9.30092	2.05475	3.42739	12.1217	2.60008	6.46157	2.97153
1.94211	12.4654	3.06051	10.1671				3.53875	6.86436	5.25458	3.91066	4.57887	7.88624				9.20663	4.22338	2.79271	2.75377	7.88806	1.39029	11.0777	2.56602	9.59707
3.03192	3.73089	4.79884	4.64633				4.35495	4.83752	2.97978	1.84122	1.81425	5.57964				3.51101	5.41914	2.55054	5.87676	2.89863	17.1739	6.22544	3.53571	4.78301
5.83457	3.27727	7.23779	3.24601				2.9783	3.65172	13.1572	3.31611	2.3681	9.03892				4.95852	4.93594	2.53346	6.6184	8.51756	5.59701	3.558	5.49184	3.16693
2.12858	3.86443	3.16717	3.80371				3.05499	3.61649	2.30354	8.83599	3.21982	5.57266				3.64981	5.59434	4.5383	2.98948	1.35163	5.98815	7.56737	5.74858	4.35782
1.67787	3.03578	2.39744	2.25159				6.49315	3.72306	4.97322	0.984246	2.61495	9.06842				4.04833	6.30559	1.81668	2.83562	1.76212	10.0679	3.10277	6.58577	6.30183
3.15643	2.56498	4.01551	12.5095				4.25486	3.14097	5.0584	3.33921	3.30177	6.39113				7.70008	3.47696	3.40652	3.31561	1.70927	3.58296	7.56914	11.3523	10.9136
2.72928	4.13388	2.73374	2.88557				6.21086	3.40556	3.59119	7.10939	2.6092	4.15323				4.25627	12.5161	4.9049	2.61053	4.93482	7.47505	2.73176	4.68469	9.70185
16.6551	2.98926	5.425	3.39455				14.4494	7.92998	3.51162	7.94789	5.73401	4.07553				3.21368	2.80827	4.18906	2.82452	7.2588	8.07386	1.55223	10.0117	3.83315
3.03994	2.04495	2.98127	1.02353				2.63826	6.158	5.21297	3.07934	4.85087	3.91364				4.78965	2.84339	3.37902	12.1446	2.6296	8.95901	4.62292	8.49286	3.34805
2.84512	3.19008	2.7419	3.78551				2.5702	3.06777	5.71653	4.73554	3.94545	6.91238				2.8158	3.91574	2.43301	5.6314	2.98948	5.68388	2.49967	15.6192	13.1241
2.9051	8.19569	2.4101	2.89122				1.45616	3.63218	4.31004	3.47012	2.24975	14.3014				2.76829	1.47614	3.41467	7.2826	3.5424	7.77969	6.02448	16.12	4.51575
2.16535	3.74607	8.602	7.47326				1.73239	3.06905	8.55986	6.15797	4.28205	12.521				2.57148	2.03795	5.54927	4.7938	5.94986	19.7841	3.14482	3.21359	11.5559
2.57549	1.76055	4.51871	2.82289				3.88632	4.32012	4.28872	5.86349	5.27443	2.93797				4.53008	3.03394	5.02349	5.33586	7.3618	7.21601	1.1166	2.75651	7.03523
2.58173	3.36854	4.14533	3.54198				4.03627	3.53473	17.3593	3.29431	8.12323	3.11992				1.20026	2.5557	1.54545	2.5641	4.58418	4.02491	2.02532	3.52474	2.83008
2.76928	2.24568	2.6762	4.74205				3.15458	3.18089	4.14703	3.39489	1.5622	6.76528				1.84417	3.60778	5.58112	12.7255	3.41627	4.9362	10.5401	3.75769	2.45188
4.67457	3.5477	6.20224	5.34739				6.07176	3.89576	16.4887	2.4943	4.04649	3.51695				2.66001	5.11945	5.46066	2.52234	3.9595	1.78284	3.91176	2.51991	3.87381
7.38717	7.10728	7.03416	8.47308				1.01828	3.1092	3.91983	3.69518	2.46101	4.54062				3.24122	1.53328	2.9611	3.23872	8.55	1.279	2.99837	6.36041	4.95211
2.62053	3.48372	1.88914	3.63732				1.9963	6.5985	5.41658	2.56853	8.1954	2.98352				3.73957	2.91584	6.78165	3.38013	1.78559	5.80324	4.56181	2.27257	24.7576
2.09522	3.52671	8.41069	4.35337				5.44415	10.8995	4.25645	6.15934	4.82497	5.51577				13.4281	6.04644	3.13148	4.6347	11.6997	5.50166	22.5158	9.45252	4.49251
2.55008	1.93983	5.26022	4.85936				15.7423	4.69718	4.37551	2.4241	2.8641	3.45339				6.31082	5.12485	3.09538	4.10543	12.556	9.19325	3.95043	9.77479	2.74691
2.95609	7.91657	4.3596	14.5253				3.58077	2.93361	3.96351	1.35894	6.8253	3.83477				10.0314	3.13384	3.0938	4.08306	3.06892	2.61562	4.99486	12.6347	4.14993
1.44094	5.45448	2.92695	2.10076				4.35474	3.59072	4.34029	3.64539	2.14252	2.96266				0.900815	37.8226	5.35015	5.73531	18.52	11.2761	2.53452	6.82631	3.70065
6.62196	29.7728	4.58727	1.24766				4.17556	6.06569	9.69417	6.56732	3.03739	9.97239				9.20866	3.45327	3.7301	3.45893	1.6618	8.50239	4.33257	8.25342	4.3793
4.81937	23.0834	3.66044	2.76179				7.45437	2.74576	2.77558	4.58597	5.08789	3.35578				3.47931	6.49297	6.102	5.55595	4.44183	2.77716	2.99825	3.1562	7.14908
2.109	3.601	4.28707	2.94215				7.37905	5.54362	7.11026	1.38806	3.29175	8.84759				7.34566	5.6774	2.16244	5.46144	3.12313	11.0519	6.92141	9.30334	8.19115
3.1362	5.35608	3.35138	6.39694				3.08299	6.08232	4.05435	4.99247	7.69568	7.74482				6.27423	4.86335	4.74416	3.1351	3.44129	2.45819	3.84243	6.15561	3.32832
6.08051	2.10748	3.09435	10.4117				1.56296	2.20286	16.0358	7.22131	4.63815	3.66275				1.39263	3.3775	4.6159	2.20438	3.7666	3.75248	5.15895	4.12196	4.14842
2.64962	4.38018	3.31334	6.42168				4.58054	3.70906	4.08781	10.875	2.3557	5.53665				2.87974	13.6003	2.39746	11.2012	6.54273	1.37779	9.48202	4.43933	5.0821
3.16543	3.93124	1.23996	5.62925				3.20537	9.23101	12.2296	1.71515	3.58188	6.30728				4.64723	3.02113	9.37249	9.02385	4.24945	3.60893	2.13874	3.78937	7.30473
6.22452	5.03229	3.74767	1.36803				2.75108	2.96665	10.4193	2.19517	2.55772	11.2208				3.53714	8.39739	2.95687	1.83112	1.05507	5.30374	12.2412	4.24336	7.00331
1.87183	4.92097	6.65136	3.94304				14.6961	12.9672	7.1213	3.13666	3.60311	1.67857				2.78915	6.74693	9.64129	6.65146	2.50968	6.81838	7.06213	5.7637	7.59166
1.45154	3.6305	5.32183	5.0605				5.74655	2.15692	6.15626	3.29425	12.6972	4.65034				2.55373	2.51219	4.69921	10.9051	2.52136	2.85706	6.6402	7.14577	5.77229
14.2409	2.7528	6.17507	3.1566				1.83169	2.11843	2.4922	3.439	5.05641	4.05784				1.98614	4.60804	3.29853	4.00393	4.04092	7.2176	5.63996	2.52866	8.12722
3.44384	3.71932	3.79431	2.88417				2.91114	2.72368	2.74788	7.27826	4.7334	3.7135				3.93582	2.84826	5.42073	2.45827	4.71085	1.37164	4.76478	4.71327	6.59685
6.38344	9.61964	4.37495	10.9572				4.16487	5.2606	10.2169	6.52328	3.89197	4.30402				6.14565	2.0889	2.67418	3.76711	3.08289	8.52655	4.65774	3.11074	5.4957
4.24113	4.3194	4.8629	3.28139				2.85338	2.36798	3.39069	3.79451	3.19337	7.46166				1.85587	4.4063	3.31463	13.0963	3.79954	16.4534	3.07795	14.6378	28.7105
3.67386	2.25795	3.7089	4.25834				1.98829	4.80198	13.906	3.69067	7.34176	2.4791				3.77772	3.78209	8.87285	3.60193	8.90045	6.31109	3.45378	10.6135	2.37639
4.40161	3.30219	6.19992	3.97239				3.46014	4.74045	4.4535	6.46268	2.94798	1.78473				3.75908	7.20026	1.84548	2.69918	1.93118	10.7895	5.03696	5.92972	5.80451
6.74288	8.00212	5.65433	4.29285				1.8273	4.17138	29.3102	3.63125	1.38004	10.4704				7.25322	4.1689	3.61875	2.69402	2.65481	4.03944	2.54777	1.78025	4.34618
2.65671	2.24902	3.5528	10.2899				1.98952	3.35621	16.4679	3.10612	2.6251	8.264				5.93274	2.91083	15.9133	3.88633	15.8386	6.15751	1.10026	2.23536	3.33841
3.56954	3.37188	2.41523	1.87393				4.16418	13.8267	3.88308	15.1718	5.18716	4.95322				1.35155	3.26922	3.70158	3.10594	5.45077	5.51969	4.77817	6.43175	4.2491
2.8618	5.74929	6.48935	9.47334				2.24439	7.46961	5.11495	2.17204	4.50042	6.75728				1.37247	2.26896	2.91401	3.61244	8.75188	5.23647	5.74027	2.39412	4.06356
4.15158	1.75756	5.64304	7.33843				4.22795	9.33336	9.80644	4.7106	9.55969	7.60712				12.977	4.65694	6.95685	3.10787	5.84553	11.0949	5.53637	14.8866	3.56677
2.84717	6.19394	2.8259	1.88265				11.4596	2.55314	7.8109	13.9344	5.75015	4.29165				2.98508	1.4538	8.78601	3.51982	1.50078	4.2426	2.44755	15.2216	4.39935
1.60132	6.63305	3.96509	2.17415				3.35759	2.29193	2.40684	3.47176	3.86551	10.0787				2.55753	7.0245	3.09808	3.75151	10.3344	4.95165	6.89613	10.0047	1.16773
7.12995	8.15551	3.51228	4.89749				2.51262	4.02194	2.72759	4.16487	3.68464	4.03519				9.58519	2.20658	0.384498	3.70972	9.57741	6.6373	6.89198	5.18184	3.18667
2.36645	5.4028	2.88008	4.74909				2.11981	6.1569	2.68266	3.5568	2.89559	3.30558				4.09329	5.2235	4.10518	3.69301	1.82838	3.56384	3.70224	4.03012	9.79138
1.75064	2.51354	4.7651	2.77302				2.3724	4.29904	10.8052	2.33489	3.63424	2.29787				5.0917	4.23711	3.20326	4.11508	2.66812	12.4473	5.32533	5.14852	5.37996
3.11869	3.43066	4.80701	2.44939				2.61944	3.74722	1.94159	2.25927	7.20669	1.96324				8.86076	3.03375	4.46836	1.95149	3.10297	4.98824	3.10736	2.7557	3.12927
3.29884	5.6747	2.85719	3.19462				3.98458	5.28561	10.8603	4.94499	3.12679	4.56027				4.17504	3.78879	8.83584	2.97286	3.13014	3.34644	2.61726	2.96503	3.94966
5.52662	9.09346	6.39068	4.09762				18.7399	4.77851	11.4821	8.66175	4.00412	13.0538				2.16022	3.14685	10.6192	20.7571	3.62016	0.948864	4.58307	3.28515	4.54965
2.97125	3.53219	2.58017	2.92161				10.8415	3.78664	3.38135	1.99082	3.15455	5.11357				2.87162	3.53691	12.008	1.56364	5.96107	11.2774	4.02098	7.02609	0.690006
2.51749	4.29564	6.753	2.30085				3.27905	2.4003	4.03978	2.92495	3.97261	5.73585				3.34931	3.5762	5.09663	6.72226	2.51957	3.49509	6.27056	5.08371	2.98192
2.13945	7.01919	4.25957	10.5151				4.67911	7.8806	3.73314	2.63576	6.18467	3.24559				4.3158	11.4539	4.09688	7.53959	3.18821	3.01064	3.30572	3.35366	11.4277
23.6793	2.69909	6.67211	3.46636				6.22838	4.63489	3.66525	3.30791	2.45319	2.62448				2.0418	6.18414	5.78376	2.84723	5.44188	7.98116	3.96489	2.3747	4.13928
7.02497	2.10466	8.38259	2.75163				1.98178	6.13029	4.7479	2.13076	2.33189	3.09456				2.36743	3.73214	2.47833	3.60936	2.74359	4.80496	5.10949	2.7679	2.71663
3.11651	4.20628	2.7919	2.85579				4.03907	4.23525	4.203	6.85806	2.4199	3.01818				4.46346	7.28445	4.3112	3.00973	2.6471	5.01154	6.16775	4.7874	3.23495
3.20659	2.44346	3.26882	2.96931				2.93842	4.57183	2.30747	4.7259	10.0937	4.42004				4.83251	5.67464	4.65869	3.53941	5.71449	6.91733	14.4604	13.0994	5.10499
2.95905	2.89052	3.58275	10.2651				2.54026	2.90978	4.77334	3.70481	4.77082	4.39728				3.27938	6.27415	12.0268	4.44268	3.51129	9.18204	3.62603	4.9336	7.51713
3.95972	4.65397	3.35328	10.4681				2.93953	3.42219	3.11817	5.38349	11.3313	12.5287				3.94859	2.29934	4.92582	5.80928	2.59992	7.37769	16.0849	14.2588	11.0154
2.7124	3.97824	5.561	5.607				4.26861	4.24099	8.31826	2.96682	7.48052	2.87559				3.52418	3.62786	6.98561	3.02655	1.81141	7.28963	1.60384	5.66306	4.74933
3.27563	3.40489	4.02019	2.82765				2.67353	4.94031	2.48656	3.93888	4.43852	2.77353				3.75257	3.35233	4.90088	3.32747	11.2866	3.71584	2.59699	4.1887	6.92946
3.61971	3.28578	2.9114	3.09939				16.3411	4.39401	6.04656	3.13801	2.78316	11.6844				2.95495	7.70155	2.93414	2.47706	3.64013	3.70093	7.55347	18.6962	9.61138
3.09625	3.14777	3.70349	4.3105				2.87495	5.7867	28.4714	12.2363	3.23494	7.28005				3.55346	9.14342	3.27665	4.09187	4.4406	5.11252	6.90738	3.18669	2.01849
2.81531	3.46381	2.84053	4.39906				8.44234	7.89764	4.48745	5.42785	3.42829	8.93034				3.02292	9.01946	6.62102	3.003	2.1152	6.70802	5.1854	2.43541	5.20828
2.26463	2.73058	5.84748	3.33354				2.50166	15.1491	5.17007	6.28412	5.68213	5.76613				5.62877	4.14127	3.52757	8.6374	8.73621	6.76844	4.45528	3.19094	5.72511
2.70219	2.53438	2.28414	4.34212				9.53453	3.01877	7.76566	3.30795	4.27946	5.98777				5.74537	6.57557	1.39097	4.97871	3.62783	4.23534	4.46281	4.02183	7.9939
3.45464	4.86554	3.79247	2.62965				1.03314	2.42987	4.26766	3.90859	3.68719	7.37591				3.92686	1.82847	3.35977	3.1273	3.05294	5.86887	3.24987	1.55377	11.6854
1.89598	2.43281	3.20267	5.39409				3.70603	4.49289	8.01694	1.96983	8.74998	3.04532				3.66003	4.01736	8.16545	1.37418	3.15106	3.65005	3.97008	4.89807	1.99733
2.76512	2.77531	4.69166	7.17193				2.88508	1.58438	6.24502	3.57106	3.2963	6.11866				5.16497	0.893326	4.69411	4.53983	3.18811	5.07161	4.75638	2.96964	10.6731
3.5956	7.90084	4.78907	4.50009				3.36961	4.88019	3.64621	2.74942	2.11406	4.2271				3.88818	4.37972	5.76767	3.81102	2.62823	3.36275	5.88512	4.92333	4.75203
6.35287	3.25404	3.51539	2.88754				13.8621	7.0712	3.91482	4.0412	2.62707	3.46198				1.28831	3.38685	3.92926	1.39562	5.89109	6.07676	2.79993	3.46982	4.54525
4.74315	3.64346	5.46983	3.31022				9.0273	5.7824	8.15719	17.833	3.60539	2.58123				2.48188	9.32255	16.6576	3.8817	6.93356	3.23823	5.33671	4.79232	16.7766
3.12429	4.93241	4.57389	4.17147				7.80276	3.70462	4.81982	3.45612	13.3218	3.33668				3.98599	4.4521	16.8663	4.84214	2.99747	11.8248	5.95555	3.56271	4.99468
1.67233	3.69363	5.93818	12.6405				3.43158	4.728	8.59264	13.9396	2.59565	3.0045				5.81075	3.04618	14.8663	2.41707	6.54021	4.07591	5.11903	4.11034	4.15167
22.6831	2.02414	2.72796	3.5962				0.823281	5.12707	4.48421	1.03395	5.99209	4.23431				2.20439	7.90789	4.90843	9.93696	8.6836	9.8361	5.88368	5.0206	5.18183
2.47893	3.38731	5.18831	4.98115				3.80496	4.22207	8.45724	13.2043	2.26051	6.8131				6.65225	3.42308	3.02092	4.77295	2.73892	4.20215	1.53193	7.86016	3.88243
1.37832	4.96234	8.99705	13.3392				8.66122	6.78915	2.80565	2.74875	2.86196	4.70025				5.40824	2.47563	4.52913	12.6061	4.43951	4.97715	2.36772	3.18967	4.15148
2.10965	3.94629	7.19653	1.73352				10.435	3.78333	4.89646	4.72711	6.1906	10.3159				9.34452	4.00996	2.68536	6.53845	1.80152	5.25125	5.41992	8.11629	2.17314
13.6569	4.52171	4.30172	0.562849				2.47542	1.62264	3.82809	8.67949	7.10574	6.60506				3.98272	9.9858	4.82123	4.98636	5.40478	7.81861	3.03676	4.31047	6.408
3.7621	4.4366	3.16542	7.31877				4.39539	3.16583	2.58248	6.59698	3.56438	7.06242				4.78638	1.92596	3.94033	5.09645	2.77418	3.64994	4.79261	12.2777	10.0634
1.89398	0.735825	2.91158	3.98893				12.1889	7.36995	9.62621	4.5566	2.78566	2.35377				3.0659	1.52874	4.86994	3.20672	7.47709	3.98155	2.40051	2.89469	3.50422
1.02949	20.9878	1.75833	2.49395				3.96977	0.363842	2.22735	3.55866	5.19233	4.14826				10.1497	5.32867	4.16341	5.09351	4.77214	5.22267	4.10036	14.8157	4.58838
1.02111	4.30225	3.40579	3.78324				1.37603	4.17153	2.50846	7.66096	2.6482	4.86892				3.37105	3.48373	2.97078	4.28273	1.88815	6.17689	9.87921	10.9014	6.37039
3.29944	16.6369	1.9167	2.7565				10.028	3.9465	2.4407	5.58057	2.32252	4.07526				3.58308	2.69992	3.98698	2.94268	2.70019	4.30928	4.2646	12.5905	12.615
2.48067	8.03474	3.50432	4.58721				1.95157	3.08128	0.961195	7.68614	5.90477	8.13516				2.93155	2.97114	2.36238	5.90702	6.57187	12.0368	4.07599	0.829002	6.35156
2.09557	4.5008	3.85283	1.43157				18.7155	7.13719	3.18671	7.71773	2.47867	7.15962				10.8557	2.53671	2.80759	2.97949	2.80166	9.37603	2.08332	2.36941	6.45711
3.28179	4.29579	3.29783	4.70911				10.5704	4.97629	6.4024	6.34277	2.83565	4.22596				4.71665	4.0991	3.52041	4.18631	4.23217	3.57663	1.76124	5.57528	3.02046
3.16148	7.61826	2.86744	2.35165				8.20112	6.17903	6.9393	5.08744	10.4761	13.7543				7.46556	7.51931	4.56316	4.9047	2.66138	2.6287	9.74122	5.37323	1.38192
2.57969	7.62155	6.89772	4.6756				5.21121	2.37531	2.50477	6.28208	3.20851	5.63701				1.80664	3.94023	6.86609	2.36831	4.37747	2.95473	2.75158	4.3271	6.24285
3.23715	2.52405	4.43055	3.9483				3.03978	6.6198	2.68627	5.23776	2.50325	2.49771				3.39648	3.99215	5.04501	6.72365	4.25206	5.54458	27.1364	2.17782	3.84572
3.74543	2.92268	4.16769	3.7816				12.064	8.9931	2.57853	3.45875	3.75177	3.95602				2.75136	3.61623	8.02899	3.33744	4.42973	3.40361	1.73775	4.36232	3.97926
5.01427	3.74504	6.63771	4.84617				4.77861	7.58442	3.47177	5.62355	1.91026	2.89727				5.89399	9.28129	6.48626	8.83299	20.4919	3.02689	7.42326	3.86136	4.56309
6.22727	3.511	4.46483	13.2463				3.07552	2.8291	8.23977	3.77212	5.13418	9.59302				1.8785	5.41516	3.48793	5.57181	2.96251	15.3472	9.50476	4.61401	9.18768
2.75031	3.48751	4.24585	2.42164				2.41555	11.4642	4.99411	3.74897	4.22508	4.1246				4.13985	1.76785	1.52758	3.58888	1.45227	6.5909	12.3601	3.51134	12.3297
2.45153	2.2934	2.60835	2.51235				3.25145	4.68458	3.04516	4.14036	1.4378	8.55964				3.94999	6.93054	1.53648	2.73997	14.1451	2.85378	4.5614	5.21922	4.66162
6.04629	4.16693	3.61345	2.17824				4.97022	3.00399	3.54893	8.93379	3.20872	3.41073				3.34604	6.13918	4.78202	2.86048	1.91733	6.19842	10.7586	15.3958	4.2386
2.89892	6.10372	3.38374	2.67016				3.35302	2.97811	3.67217	18.5407	3.30441	10.3178				2.97173	2.78643	2.05236	2.94478	3.69633	8.24036	10.4065	9.73791	6.39706
3.22441	2.99067	4.38512	2.75834				5.25172	1.34212	3.61037	9.14901	3.55258	9.89693				1.82391	3.86551	4.36554	3.92762	3.14931	3.89836	3.52705	9.40743	4.89731
2.19815	5.40501	3.7986	6.21038				3.65455	3.20855	8.08934	1.26836	3.68468	6.06512				17.5902	9.4744	2.50339	2.68097	9.91698	12.3456	6.99751	9.6303	7.7347
2.83166	1.71578	5.05711	4.69923				3.30761	3.99984	7.55978	9.81315	3.47026	3.119				4.54098	4.55008	3.75044	4.98049	4.12402	4.16338	9.61955	2.65035	9.47636
3.34258	1.77196	5.4996	10.032				2.85085	6.84654	2.80235	2.52525	3.14146	5.078				5.21743	3.18789	4.96849	2.86731	6.22308	3.55093	4.05544	8.88928	4.05918
3.01385	3.53773	5.80324	2.51999				2.48644	5.22388	5.73131	0.99415	5.92802	3.18979				1.23083	6.96279		4.30127	3.84726	7.81397	3.23534	35.5395	4.82213
16.3135	3.4691	2.22538	2.00071				2.40204	3.86212	2.951	5.83223	5.94989	4.47645				2.27498	3.13239		1.78487	7.41316	10.2691	3.53285	3.61498	2.96968
2.29932	2.81266	3.00256	3.09194				1.84873	11.4702	4.79355	13.8869	3.31491	5.74204				8.3962	3.19281		3.74982	2.18501	2.57921	3.04628	5.84277	5.23454
1.96725	3.04153	3.32713	2.61189				3.59271	7.20848	5.97681	23.4057	3.68512	2.16701				2.49927	3.37292		5.77681	5.35816	3.99679	4.05151	6.09802	11.6186
1.77485	8.07027	3.68797	7.83842				13.2436	6.45688	6.7452	3.38949	1.13094	7.62854				7.04007	5.00907		3.45559	7.37398	19.1276	3.91841	5.55069	11.1725
7.60633	16.4813	4.6901	2.90454				4.05975	6.39537	3.13707	3.57022	11.1704	7.88381				5.66305	2.89586		3.69	2.20618	2.83037	3.96043	4.89641	4.20812
1.97157	3.73583	2.51481	2.66596				3.68126	4.75268	3.56717	3.06965	3.27891	6.17418				5.33149	3.51437		2.49042	6.7672	2.60476	2.55192	4.77983	8.07817
5.29452	2.99336	4.10347	3.7599				4.3001	3.36919	3.93306	4.12506	3.66823	3.93645				1.58219	7.88549		1.0494	3.00995	2.93693	10.6538	3.06937	1.39081
3.23825	2.79017	3.66582	11.9617				3.61432	5.08141	6.35628	5.52539	7.47889	4.68924				1.92441	7.53662		3.02027	4.06291	2.31667	6.01424	11.3244	6.75159
4.57449	2.06009	3.57038	2.69987				2.78541	6.20585	11.2954	3.17017	7.92644	3.62043				8.62514	11.7872		1.71377	3.10972	2.41839	4.06616	5.39133	7.10219
3.29355	3.34412	7.93067	3.75422				3.19431	5.93192	10.1788	3.12835	3.16739	3.08893				2.70669	4.28983		5.86111	8.64238	9.78035	3.41018	8.05446	2.4842
2.91856	2.59353	0.737302	11.6067				5.55055	2.70192	6.10309	6.69407	3.94858	2.40945				2.69138	8.06331		3.82133	4.98798	3.10964	2.8705	5.69169	5.75062
3.45037	2.28842	1.54204	3.01485				3.6702	4.23917	3.55154	2.67169	4.15849	5.40655				4.17184	4.68486		14.1018	4.06885	3.29784	2.3432	3.04908	4.66271
2.38826	2.68407	2.14442	5.69989				3.68072	3.70434	2.04463	4.045	3.45922	2.22382				7.28933	6.44175		4.05508	2.99698	1.7992	3.32696	5.49657	4.26732
2.38699	3.57309	2.62272	4.00078				3.59011	5.0993	8.85715	12.6916	5.14692	3.86954				1.42385	1.79049		3.53185	4.66197	7.21602	2.95025	11.1459	2.99312
3.87814	2.71345	8.02832	2.4743				2.1277	5.89733	1.93768	5.83458	5.08989	3.35867				9.98204	2.54376		4.34029	3.82911	3.05816	3.29462	8.50405	2.92635
4.38653	2.9468	3.28641	7.55169				10.1161	7.17143	15.815	2.83703	4.34403	3.7173				5.39128	3.08514		2.91411	2.66594	2.8001	2.23476	4.2679	3.9577
3.37149	14.2164	2.30164	2.37948				2.988	6.41163	5.13283	2.75642	2.84233	5.86868				4.06688	3.41656		3.63368	9.33958	12.0923	6.84364	6.46816	4.57882
3.54508	7.42739	3.44552	8.45616				11.3493	4.69244	6.49456	7.17181	3.59909	8.57275				6.16219	2.70768		2.94649	3.20811	4.34095	1.58328	3.31152	9.16959
3.04692	3.83306	4.02875	3.58921				18.1355	6.83439	2.622	11.1884	5.01503	3.9358				3.20353	7.38658		2.82822	3.18437	4.48507	5.25558	3.45844	8.74129
2.68992	24.1251	1.41096	3.96795				6.6057	3.10625	3.40415	6.20871	5.55075	3.35705				4.05249	2.8523		3.94238	2.1883	3.34854	5.30407	6.63538	5.36731
3.10142	3.39277	5.74717	2.61287				9.92434	12.104	5.72392	1.9962	3.47642	19.8566				2.86509	4.04159		5.45632	2.51799	16.6978	7.62004	4.58476	9.06082
2.13766	2.56346	3.70219	6.59273				6.53028	2.31908	4.06196	3.80059	11.652	10.6671				5.04798	4.08768		4.13556	2.46468	8.64423	2.71667	8.99274	11.6065
2.33779	3.57349	4.9523	3.30349				2.34805	3.90552	7.21848	9.56234	11.8846	11.8112				4.41655	3.6216		4.94152	3.0258	11.1003	4.41131	3.27238	4.40241
4.17462	2.78658	5.09104	5.39735				4.48712	3.38007	10.6977	2.58158	14.1266	4.52896				2.7431	3.68769		5.05272	3.6415	13.1841	1.77685	4.7319	4.22143
3.46391	2.29873	2.37221	4.41824				18.8353	2.019	3.16696	4.36596	3.60778	3.31939				3.61161	2.53714		2.86299	1.37368	2.83875	2.35882	4.80554	2.45901
3.43926	2.91933	2.88021	2.91858				1.36864	6.60119	5.83138	4.26343	7.85375	4.42232				3.6923	4.14115		3.19701	1.82893	4.02361	5.08105	2.49475	26.6496
8.0678	2.96867	7.13841	2.9934				3.25206	1.84626	3.58131	14.2311	3.48569	12.3943				2.78089	1.60309		3.52246	3.58958	1.1494	1.99386	4.4713	2.95983
15.1906	4.90554	3.19289	4.05474				3.2333	1.97008	3.01127	2.14404	3.31076	2.45681				9.54179	4.70075		2.37752	2.98735	2.34917	13.4016	10.3687	9.53635
18.0396	3.10145	2.02315	2.81591				3.6165	3.97467	5.6658	16.7154	5.02918	2.18833				3.56015	1.63124		4.90795	5.52536	5.05435	9.52287	3.76897	5.86975
5.07944	3.77102	4.75023	7.95194				2.66695	3.47243	10.5101	3.25285	1.51278	6.14698				2.82072	3.34841		2.87974	3.69248	3.79375	6.02162	9.83169	2.66494
7.61516	2.93289	1.82702	4.1978				3.32653	4.75011	4.17369	2.43838	1.9856	3.61802				2.92116	3.06961		5.67758	5.35834	3.88987	1.84496	4.96498	9.22396
3.3052	2.96531	2.70156	4.03256				3.14684	3.53999	4.83988	2.94844	2.14324	6.30928				2.86836	4.17501		4.00974	2.23041	8.73621	4.18991	4.5535	4.77517
1.28836	2.0611	3.3204	9.63437				3.93754	2.36066	6.61365	4.39717	1.74161	5.11168				5.85839	2.69255		4.5088	5.21937	8.79928	5.54367	11.4732	5.7922
3.57174	2.87222	4.23336	2.55633				3.17005	2.34011	18.0734	2.85137	3.18097	4.22717				3.36508	3.05844		3.87274	1.33294	3.99212	3.88412	4.94695	3.58609
3.13472	2.37072	4.53576	14.723				2.27436	4.40024	8.18539	6.51543	2.54737	2.38022				5.34808	3.33219		8.4783	1.85975	7.20279	8.84246	3.44803	2.7644
3.05058	3.95887	4.33225	8.35235				3.77605	4.06362	5.21544	5.49469	6.47959	2.5751				3.53911	2.03249		2.73373	3.73376	4.5638	3.29958	4.54591	2.96304
3.97459	3.9394	2.99016	2.6343				5.78107	2.18808	4.81095	4.4452	9.59258	13.5776				3.25935	7.66386		3.90031	3.84392	3.68237	2.96031	9.17401	7.61455
5.25436	4.16854	2.95391	5.32371				4.05281	5.38606	5.15046	5.82432	8.27669	6.14082				11.342	1.7609		2.51853	1.83052	8.84987	2.94978	4.5304	4.59028
5.61617	3.00632	5.82732	3.32871				0.656535	1.46979	4.76942	3.25054	2.87197	10.6076				1.44301	7.42086		2.19438	9.20049	1.97751	3.18878	5.89983	2.79377
3.05357	2.72532	5.14667	2.3646				11.8631	3.3696	10.9416	4.41165	3.22569	5.39312				9.88398	10.7392		2.94858	35.0949	9.0599	3.6498	7.6893	11.2165
2.38945	3.02809	7.76077	6.66908				9.22276	6.24332	28.1018	5.99893	5.36156	4.13999				2.89033	4.94918		8.48073	20.7561	7.03501	2.23507	4.88361	11.2072
2.29013	4.48044	4.76336	2.14351				3.25785	5.48612	1.58752	3.58744	2.56274	7.03774				5.61355	5.84467		2.40456	1.29407	4.78153	4.85246	6.90866	2.27752
1.88749	3.24282	1.90629	3.58095				6.20782	5.22767	1.9156	5.23048	2.36068	2.23564				12.1533	2.51924		0.899747	2.61091	3.93309	17.1708	3.45435	4.0711
2.87847	4.25268	4.58534	2.55021				5.39926	3.77723	5.21609	6.79996	7.51918	5.84264				3.82571	6.93803		4.03447	2.90682	8.00326	3.01172	9.91566	7.83575
3.30834	1.3209	7.22378	6.27348				2.92575	3.27927	3.49353	9.29044	4.22609	6.76018				10.1168	3.62793		2.81411	3.65205	4.64846	9.29609	5.24974	8.32222
4.11595	3.89118	8.61541	4.64451				2.49985	7.12678	12.7986	2.38523	1.91193	12.9405				2.12482	4.03829		3.45643	2.86963	8.32844	5.65618	7.51584	1.939
2.79798	4.837	6.66625	1.98371				1.90865	7.97892	7.8835	7.52907	5.68985	8.61676				2.31435	2.86421		8.33634	4.06436	13.8652	3.92087	6.9599	6.48827
2.53165	5.36583	5.86185	2.53721				1.50204	3.55238	6.95174	7.37883	2.57067	6.25142				3.9696	4.25361		4.21459	3.97719	3.42494	3.87663	5.08053	4.88151
3.20584	10.3204	4.62801	11.4034				7.1841	7.06139	5.52273	4.30827	5.50823	4.10836				3.43864	3.73325		3.24298	3.78243	1.7662	3.02108	4.83964	1.77428
4.44096	12.9786	2.85339	4.41314				3.00849	8.2651	3.7811	6.85133	2.5463	2.76271				3.35791	13.2687		3.73276	5.26716	5.43753	2.19461	9.49486	5.84629
3.56596	3.95362	3.53625	7.68368				8.16624	3.66997	2.63341	5.31056	1.28177	6.18475				3.16675	3.91091		4.94332	16.9082	5.6682	1.60221	2.23649	3.36023
3.66961	2.65254	4.73469	4.55061				4.42603	4.49565	3.42977	2.27727	1.11878	2.80353				2.94223	7.61336		3.94208	2.72129	3.55648	2.86485	3.93549	3.46887
2.16851	3.46442	5.54605	13.7221				2.23967	3.8217	4.5455	4.50927	4.56723	5.90303				3.08156	4.11207		5.14511	2.29332	7.91591	2.40722	8.38642	3.55778
2.22241	2.18715	3.79375	11.0959				11.0861	7.60149	3.34939	5.65653	3.17447	4.53657				4.35988	2.85479		7.52376	3.45259	7.06085	2.70181	14.7248	3.47543
14.2948	5.02501	2.05808	2.18607				2.00663	7.22413	4.68001	2.99353	5.1568	4.03832				3.84577	11.3231		4.93937	4.09299	5.11592	5.20642	1.85846	1.29167
13.891	2.77778	10.1549	2.85992				1.40244	6.93879	4.37263	3.42479	5.38924	2.7584				7.3063	2.35733		2.56986	3.82164	6.12902	1.24235	3.9659	6.39988
9.48385	3.42621	0.451399	5.35893				1.83876	9.15434	4.724	4.53465	6.02121	4.78868				3.45206	3.15807		2.22823	10.0696	9.62829	3.10919	4.01648	12.7469
2.97822	1.80329	2.96398	3.37159				0.0762946	12.3528	6.66014	3.79576	3.17729	4.16787				3.10072	8.10434		2.83672	4.94487	4.39378	3.45379	2.80369	4.20399
4.37154	1.85071	3.31301	5.01				7.30875	5.42402	5.64896	3.46372	3.52337	4.23297				2.06865	8.50854		4.87312	5.38493	4.469	4.87941	3.43533	1.79543
2.7837	4.7778	3.22593	3.35261				6.40778	2.80094	5.41933	6.55713	4.7895	2.92989				2.80991	3.04703		5.67644	9.62887	3.08804	6.20024	3.77481	3.59393
1.45901	5.734	4.13091	11.1141				6.42046	3.56205	2.77675	8.17737	4.25638	6.89856				2.81987	3.0094		3.88624	2.19988	4.3719	2.90895	4.56867	4.06103
2.54635	2.24658	5.18052	4.8961				3.47374	2.52163	1.66731	4.02049	10.6746	4.01743				4.18013	4.38968		4.27405	2.54795	6.34727	4.19826	6.00193	4.31081
3.73158	3.69038	2.37022	6.66906				2.3767	4.42712	3.17292	3.74807	3.25337	10.0374				3.50113	2.62442		12.6318	2.04163	5.07184	3.73322	8.10912	10.265
2.55604	2.53997	6.81813	3.85228				4.4824	1.8766	5.70619	4.72499	8.91565	4.29098				6.90096	1.29559		2.04459	1.10252	3.31741	5.76578	3.64113	2.61755
3.07593	6.64707	1.46198	5.2236				11.5063	6.49336	5.41454	3.83266	5.29584	1.34432				3.12032	3.03132		6.03422	4.25864	6.52816	5.53223	2.75015	7.6616
2.12289	3.91999	5.01365	6.37678				8.24244	3.6992	13.2017	5.7096	4.50558	12.2791				3.96882	2.91394		3.16491	2.69228	2.99643	3.03762	4.42887	3.96801
2.54381	4.20706	6.22367	11.9169				3.73774	3.44345	2.63892	8.08776	2.23292	2.68148				4.01044	6.52535		1.37597	2.83377	5.2326	3.4978	7.02132	2.92461
2.67644	4.29494	3.09958	3.16704				2.42491	11.5257	5.4943	12.2345	2.92286	7.57764				5.30992	4.59814		2.33864	4.47943	4.04519	4.61575	5.40033	5.35826
4.73692	7.6442	4.04945	2.27143				2.61005	9.186	2.24047	6.93354	1.33071	7.48899				1.90115	4.64918		3.1608	5.09907	1.96944	5.69117	6.88215	7.07273
4.55901	2.20583	3.92979	3.26872				3.26813	17.3398	5.28388	16.7751	7.39313	5.31412				3.64466	5.4285		6.12598	2.47974	6.98291	3.28298	6.44175	6.31609
7.59284	5.79295	3.93754	2.20657				3.82491	3.31239	2.56182	4.71176	4.94518	12.936				8.2865	8.27907		0.88058	1.78467	5.64638	2.97013	5.38481	8.44734
5.23636	8.31382	4.03719	3.29861				9.57961	4.47928	6.03876	1.97374	5.57726	5.61233				1.90356	3.32466		5.62839	2.88526	6.18062	4.57669	11.2245	5.11415
1.72102	1.88907	5.62925	2.71913				3.29746	3.271	5.24544	4.80312	3.6827	6.80847				8.16546	4.12281		1.6019	4.3917	5.17819	3.54024	3.91647	7.50818
1.07524	3.93634	1.96893	4.61611				6.54896	10.7892	4.05317	3.74634	4.05372	3.57431				2.49067	2.38163		16.8706	1.68818	2.46457	4.06678	5.31788	3.52337
2.95001	6.47812	3.5147	3.58103				1.86259	3.83547	3.89904	2.65578	3.93807	6.49929				2.72838	3.23475		3.08818	3.41433	2.72722	4.40322	3.21568	5.53722
3.77652	2.55395	6.42028	5.16558				7.95805	2.86595	4.07358	4.00799	3.87573	6.21305				3.7631	2.06676		2.0228	2.44235	4.81886	5.511	3.82435	5.82289
4.35898	4.99739	5.43881	12.8393				13.0453	5.44129	4.0616	5.17163	5.78198	9.01719				2.93576	8.28169		3.91433	3.46484	3.10628	4.85306	4.06875	2.91166
3.13879	2.59711	5.47175	2.93696				13.7184	5.21271	2.71322	3.73819	3.28986	3.28204				0.762956	4.10059		2.56278	15.8988	3.55181	2.79767	4.96472	3.56407
2.92383	5.74569	4.77353	4.28324				9.09315	4.38519	2.78542	7.14	6.02104	23.0758				3.86375	14.6679		3.34494	1.5105	8.77152	3.53478	5.08683	3.48311
1.09711	2.38533	5.51935	3.80372				2.74673	4.08977	7.33772	3.31613	5.45055	5.44139				3.28329	1.88183		3.97168	2.17987	13.1723	4.33119	2.55884	11.8436
3.96602	3.46786	3.9331	7.47608				3.63441	2.6916	3.21882	14.1327	8.53689	3.50817				3.67522	5.52892		6.29557	5.60272	3.68157	18.5156	4.13596	5.70412
2.31868	11.647	3.18125	3.7929				2.86707	2.49273	5.91716	4.07113	3.50132	4.27179				3.70329	2.42558		3.73916	2.33643	2.55084	6.22416	8.27507	3.53192
2.22279	8.17211	2.81276	4.88162				4.14657	4.15033	6.63558	2.91336	2.27474	2.21683				4.23932	3.01604		3.82761	2.46889	4.75138	2.91176	8.51793	2.5869
2.1709	5.0301	3.25896	12.2981				3.96377	5.92521	3.66141	4.78479	2.33608	7.68565				3.12639	3.30078		3.25461	5.8803	7.58056	1.11447	9.35097	5.49371
20.259	6.64123	2.65039	3.74903				3.29023	2.91104	3.50903	2.36248	2.47858	8.2072				2.96278	4.24045		2.20031	6.98725	3.19328	3.79651	5.66459	6.15041
2.13833	14.9332	0.96962	4.37926				2.8733	14.9185	10.7491	3.55669	2.33888	6.30501				3.43532	1.79508		9.20141	3.10305	1.79491	4.333	1.46151	9.14298
3.76708	3.10446	2.88264	3.15565				8.59258	8.90433	3.2387	4.14645	14.8719	4.34561				5.03262	10.6781		2.19057	3.6011	5.97619	7.22205	16.3199	6.70849
8.28761	1.20913	6.90543	2.7607				3.1197	3.06904	14.2899	4.29281	2.98679	5.21687				3.00345	5.15157		2.3786	4.50766	1.7673	4.46121	16.7499	15.053
2.222	3.22389	3.25478	7.72198				3.3413	6.90555	3.00185	4.50336	3.81018	3.5483				2.07919	3.96931		1.42029	2.56499	2.01887	3.00437	15.1484	9.53328
2.52447	2.22422	8.16334	1.80039				19.4824	3.95471	11.5981	4.70368	5.55528	16.8012				4.94016	9.95944		3.53865	4.07176	3.3508	4.08924	2.73593	2.23841
2.36379	1.27112	3.78231	5.91511				4.45876	2.68741	5.61806	4.80344	5.3642	2.24344				3.326	3.07551		7.1498	4.33609	4.28468	8.53848	5.82772	3.94715
4.05058	11.0162	4.71992	3.36081				2.52084	3.19497	3.53218	7.11917	4.8157	3.04691				1.91255	1.80609		3.32942	8.31125	9.84994	5.85737	3.70513	6.49045
3.19012	3.3833	3.7076	9.30725				7.6769	4.75058	3.70613	2.44765	10.6286	3.46414				10.3431	15.6416		2.45249	3.17967	10.8376	3.23537	2.50216	3.24519
8.77807	2.83418	8.27094	3.66251				12.4815	3.15513	5.22878	6.61592	5.78456	3.17419				8.53347	1.9513		3.47789	3.43856	6.42244	10.9587	11.2882	14.6548
2.33053	14.1808	4.5436	2.04875				1.21438	4.93166	7.81071	20.75	4.01259	6.07806				1.62561	5.3114		4.59081	5.11968	9.32708	2.33478	3.41383	5.86459
4.57687	2.81943	3.45379	2.56474				2.73594	5.78049	3.61243	3.9099	3.64176	2.19265				4.54529	3.46742		3.14497	8.32606	17.0424	4.73648	3.38572	6.65804
3.12402	2.77954	2.25248	11.3865				2.45006	2.10267	1.70701	1.25725	5.87674	1.08143				2.37784	3.73453		6.94165	9.31226	3.454	11.9809	3.46459	2.89975
4.39791	4.64791	6.01148	6.85063				3.49841	12.0572	7.28734	8.68569	3.75369	1.59471				1.7407	3.12327		2.98421	2.89646	8.14685	2.92216	3.13681	5.9509
2.35441	5.04249	3.02266	12.5904				6.615	12.6663	5.06962	3.13619	8.82212	3.89657				7.82876	10.3348		6.09111	2.4748	3.74907	8.08437	2.86794	1.76926
5.83316	4.72648	6.41555	5.2694				2.66069	2.75372	4.73104	9.51236	3.24483	6.47805				2.71693	10.5995		5.53566	2.89756	3.45982	4.05341	3.14599	4.07719
1.885	1.61928	11.1289	3.5611				8.59615	4.0479	0.544422	1.64527	3.3471	6.01094				2.44577	2.2088		6.28244	2.91378	1.64319	2.24593	6.13355	8.03879
2.68159	3.29965	4.00848	1.72247				3.52727	6.16252	4.72023	3.06103	3.91299	3.17568				3.52804	2.21669		4.77276	4.34456	2.9064	4.09753	11.3546	14.2226
3.0789	4.48145	3.08378	5.67938				1.5933	5.17795	4.0804	14.1317	3.19867	5.85793				4.74998	23.4765		3.66416	2.11673	4.71659	1.55957	1.7555	2.78886
2.2683	3.1663	3.91261	4.37602				1.92005	4.19113	7.93259	5.96674	2.72021	3.85585				3.5772	4.16064		4.26939	2.00044	5.28944	4.8141	19.3732	4.46571
2.24476	1.15883	2.53538	7.44403				6.73404	4.73002	1.14226	11.0554	8.90421	6.59292				5.19498	9.93479		3.50791	2.52195	3.47904	3.5735	2.19333	12.4854
2.80623	9.21952	3.8372	2.12262				3.31058	3.95352	14.4841	13.8283	7.51114	5.84805				3.4311	11.1016		2.9443	3.24366	10.9771	9.57257	5.60463	2.03824
2.56695	6.23838	3.04781	5.97331				11.2065	3.15645	5.30721	41.9022	1.81306	8.21524				5.0611	3.19279		6.87454	5.2497	13.3301	3.25792	2.60057	12.705
2.99105	2.04702	5.07679	9.70414				6.33501	4.31432	4.75545	7.38208	6.45034	9.44421				3.98282	2.9384		5.95078	2.30127	10.6989	3.84454	2.56745	17.2523
6.19085	10.0856	2.65061	16.6588				4.71981	4.26683	2.2986	3.37403	8.61018	6.61283				9.08168	2.94737		5.40822	3.03292	7.21619	0.882435	7.33438	1.90186
2.28726	2.92391	5.81215	11.8913				6.84153	2.08919	6.30962	3.16655	3.9461	3.22707				3.48118	6.00921		7.34057	9.49817	10.725	1.51423	5.14282	4.66915
4.16109	6.50151	9.65006	9.29556				9.53322	2.18979	4.64328	3.31917	4.05607	6.81625				12.7518	4.60152		2.46689	4.0686	5.16449	3.01808	3.72338	4.73645
3.35976	5.36086	2.55075	3.31701				6.92951	13.039	6.77024	1.71171	3.51508	6.18379				3.60345	7.73448		2.63302	3.24851	5.04309	5.46612	6.3814	4.0444
2.74006	9.6039	5.67581	6.74592				12.0156	5.7426	2.01754	1.63516	6.14624	5.67721				3.80598	4.15246		2.77902	5.50329	2.46163	9.78505	10.3593	8.71787
2.35124	4.15941	2.78104	5.68367				6.02036	2.56793	10.1739	2.656	4.31968	4.35419				10.5393	5.47292		2.59768	6.35361	11.7768	7.82372	7.02834	3.50132
4.15681	4.141	2.87586	3.85006				3.81648	5.16777	8.71845	2.87909	2.57093	5.28183				4.36032	2.03935		3.79351	2.78944	13.6977	7.02535	4.35155	4.36686
3.16051	7.63052	5.46641	9.37071				5.87128	2.5758	5.00878	11.9201	1.92788	3.09328				1.95928	2.85833		2.28991	10.1571	4.27879	2.20664	4.24151	3.67646
4.06663	4.46509	5.12553	2.94595				10.6148	3.97617	3.86982	2.85148	4.31251	2.36284				3.21691	3.38333		2.30153	2.16061	9.63553	7.92651	2.84593	6.6918
2.53275	3.26929	3.80281	2.9745				5.71411	5.37178	6.59327	4.99975	7.76761	2.70194				5.76179	2.08285		7.36108	1.96066	3.04419	10.0598	12.5546	5.67997
2.45789	3.08916	3.9339	3.69509				6.30902	8.70692	10.3785	4.19951	4.118	2.89867				3.66724	1.9892		2.00755	3.99526	3.23394	3.55958	11.6605	6.59067
2.90602	2.98222	3.11784	5.41215				1.70803	8.66581	6.83668	5.15861	5.83814	15.9175				1.90784	8.19865		3.6546	7.65503	2.79007	2.92981	3.42735	7.19616
2.31234	3.40302	2.68649	4.4121				0.718802	4.86724	2.98648	2.86486	5.0783	12.2051				3.02528	16.7413		3.62078	10.5782	8.76348	4.43982	18.0989	5.58037
2.3352	4.72318	5.43078	5.13372				2.32517	5.61873	4.46979	4.39695	4.03053	9.67424				6.10588	4.08324		3.0892	3.19077	5.9143	9.87291	8.96817	11.4479
3.44357	3.03248	3.54039	2.55378				3.02567	2.38458	4.47767	3.10883	3.01467	3.09295				2.11493	3.65519		5.38365	10.1243	5.2414	2.95938	3.54544	7.93663
3.16244	5.02247	5.03027	7.42167				2.62015	3.55194	1.879	2.90093	3.13042	2.80377				13.4707	7.08959		1.07544	1.71484	3.35344	2.22892	9.69733	12.7731
10.7576	2.49475	4.51643	5.27864				4.87515	10.0979	5.63038	3.8011	3.81934	11.0597				8.91525	3.21179		15.9421	3.78715	4.57374	2.1233	9.69436	5.24822
2.62319	3.41816	4.65218	9.23975				3.01003	7.5199	2.73381	2.93206	3.0773	7.29926				2.85293	8.48648		6.42546	4.55352	8.04174	8.70428	20.2524	0.603771
2.5836	3.93218	10.9568	2.91481				4.48562	3.47734	11.8417	8.91728	4.07815	3.87625				2.42255	2.98754		4.58594	1.83496	0.871551	8.98745	25.456	4.11863
6.0637	3.38738	16.1903	3.93683				2.28301	5.75825	3.56729	7.68349	5.70004	6.40581				2.87159	3.37034		3.84244	2.76727	6.49235	7.65139	8.1792	3.46301
4.31218	5.0839	4.10241	5.09471				3.43922	8.87287	3.50716	8.60222	3.76963	9.60568				2.5059	5.60429		30.6099	3.09273	4.54521	3.96225	1.70988	12.1498
2.71196	4.843	1.86346	3.15103				5.63163	3.5771	3.45573	3.5783	14.7328	4.93258				4.97312	3.22467		5.78943	3.15016	1.17928	6.91957	6.60479	2.48339
11.0529	2.48392	4.02969	3.59442				3.40989	6.99238	2.09641	3.86847	7.71153	2.56737				4.22117	7.09456		2.145	2.45918	20.3938	2.03575	5.06475	3.89102
4.7525	5.72599	3.19331	2.49242				4.00972	3.06625	10.7758	2.54919	4.34183	10.5196				3.61716	3.02131		2.23406	1.87499	3.60586	9.29502	3.07157	3.72519
2.6414	10.1441	4.48243	4.86723				5.0938	3.09978	14.6972	5.16437	2.89974	7.01181				3.39963	3.98932		3.91813	2.81289	1.81655	3.90385	9.08939	2.71933
2.90978	0.674588	2.28857	3.61051				4.17922	2.06779	11.8073	4.26761	7.34735	6.84346				3.03	2.92105		3.30004	3.06857	3.59031	4.40479	2.85846	4.76548
1.45871	1.92566	2.16125	5.65096				4.87422	11.8775	9.38964	2.52172	3.76384	9.16296				6.00931	10.1911		2.62438	1.23776	5.04659	2.0707	3.75117	3.91902
8.43004	13.2253	2.88168	6.4053				18.3419	8.21758	8.42776	3.64145	10.3475	10.5104				3.76458	3.78822		1.98935	2.07021	6.90492	2.55926	8.50163	3.89401
1.61423	8.7019	1.34166	3.06232				5.6187	5.14308	6.31386	2.59742	2.81878	13.3379				4.543	4.0948		4.61728	4.39429	9.88117	4.78882	6.32522	3.34289
5.9915	8.27906	4.40089	6.70987				3.68699	6.97592	4.05905	2.34375	6.91955	3.96004				3.93539	4.81972		4.49571	3.79633	8.84248	2.93434	2.38972	15.3866
3.15574	3.54728	2.01604	4.99464				3.95518	6.61146	4.33884	3.59563	3.48525	3.51382				5.5214	4.7472		2.45877	2.37494	7.16439	4.2601	6.54348	4.44
3.0876	2.80722	5.49898	1.76857				3.6093	5.60232	2.72166	2.41696	4.28096	6.89243				7.68421	3.52983		5.94045	4.39165	1.75478	7.5843	4.32567	4.36402
3.69286	3.1743	8.20808	20.6208				2.54495	8.67894	4.21599	3.44612	10.3046	3.98865				11.9885	8.87848		5.68417	3.70457	6.97774	13.8756	5.3394	6.62042
3.01212	3.94633	1.47875	21.1861				2.96835	9.5926	3.91373	4.66122	3.39491	3.62574				4.95908	2.90971		3.58407	2.74131	7.34656	2.51015	11.881	3.33692
2.8658	5.9098	4.13769	5.71025				2.77581	5.57798	1.86834	3.68341	3.24926	3.83551				1.81607	4.18945		4.79588	2.03982	2.16943	4.80927	9.67295	3.13622
6.87195	5.93406	6.2564	2.46729				3.03011	3.85492	6.80531	3.85458	4.54921	9.96005				6.06478	3.58344		8.29297	0.761815	15.7237	6.82626	7.01209	3.19055
2.57677	2.40014	2.42255	5.54826				3.02455	10.1451	7.60335	3.74512	2.6695	7.88348				5.06099	4.31298		8.56116	5.78138	16.0914	2.1873	12.2393	2.17926
3.42041	3.08187	13.2663	7.3992				12.5902	5.07368	2.61805	3.18332	6.18116	7.7487				2.53121	4.09148		12.0552	15.6514	12.6789	3.44123	12.7721	1.97838
2.64374	3.53345	5.41693	16.8784				4.45689	3.38141	2.75572	3.07701	3.60432	2.49732				3.99102	2.99299		13.3548	8.34299	4.22916	2.11934	3.04611	2.53224
5.77395	1.91115	4.63568	4.01233				4.30021	5.94612	3.49127	2.33101	3.05623	5.66659				4.19185	3.67243		4.1255	4.17147	7.82999	2.04796	5.74102	9.03868
4.56256	5.33289	2.40274	7.67231				2.44965	3.77592	5.67237	3.01725	6.38741	7.62062				9.87089	3.02472		5.78577	1.69861	4.75183	8.96246	4.60631	6.68562
2.24059	3.54767	4.2369	5.41162				4.45888	4.35589	7.87201	5.40786	3.46077	3.92083				3.97999	3.8676		3.62532	7.9053	3.1549	3.8052	3.26723	6.20753
4.01058	1.69452	4.13953	3.71121				6.21074	2.21461	4.55552	2.67648	3.64297	11.2475				5.54264	5.91695		4.19865	7.24103	8.41235	4.53502	6.68505	4.94542
2.51248	2.75821	3.92351	5.48534				4.5806	3.64348	5.30749	3.52218	11.1646	10.7023				4.259	2.97107		3.63246	12.8532	3.94863	8.18481	4.77405	4.37291
3.77724	5.32498	5.82806	7.56292				3.76235	4.94677	4.13762	3.20102	4.9907	4.11834				4.15138	4.23069		5.64185	5.11055	5.50257	3.36286	6.02813	9.1568
4.41339	6.66724	5.92334	4.89333				9.33464	3.67726	5.19294	3.92869	5.0639	2.92313				2.71554	1.90897		2.80759	3.55639	3.4639	4.39677	4.0156	6.94113
2.38202	3.33982	2.01429	12.5099				6.2808	3.59504	4.88137	6.91597	5.73386	9.22054				0.796308	4.44693		4.94359	2.42902	4.33092	4.4726	5.95566	4.64888
3.04257	3.78539	2.83171	15.4173				4.57428	3.95903	5.82978	2.25412	5.58404	6.71979				2.00128	1.65128		3.17747	1.40965	6.06209	3.63843	2.9996	4.06755
3.2362	1.47522	1.94274	2.57491				2.31292	3.82971	5.85848	4.3224	3.39155	3.47395				4.07204	22.8272		3.51481	0.700135	9.66205	5.14064	5.36381	6.04424
2.37343	3.90398	2.91723	2.81963				3.93966	4.8135	5.40001	15.9092	2.86156	8.37063				2.24132	17.1981		7.69347	2.65061	4.37838	6.03662	6.01338	1.52653
2.93071	4.91403	4.00743	3.27011				4.42162	9.86658	2.94808	3.71956	5.6534	2.9434				9.98835	5.10291		4.02533	4.21757	26.8264	4.78251	3.22151	5.5659
4.81124	3.09853	4.08257	6.74233				2.89073	4.65711	7.11609	4.29634	3.85357	3.35617				4.00864	4.73068		4.14301	3.68075	2.03775	1.79458	11.7694	3.57785
3.27553	4.04379	6.05085	20.3554				3.28979	2.86838	12.1528	6.19712	4.8833	12.9279				2.37052	3.3843		2.81394	3.50281	6.65223	3.03798	16.1321	8.49614
4.70195	9.13882	1.14855	2.47475				8.54519	5.28077	5.92974	4.33918	4.11098	5.87215				3.64489	5.03698		9.25248	3.05002	7.25915	7.67606	2.79286	5.21533
2.6505	7.84793	5.113	11.2731				2.43002	8.83128	14.1016	3.85812	6.44107	3.79115				3.58702	3.32667		6.91234	4.21025	6.67301	3.36854	26.331	9.92835
2.1549	2.19909	1.97176	3.54713				2.23319	4.59813	4.39771	6.63907	2.72812	1.7919				2.43086	2.57729		3.01273	2.5282	2.34342	6.71955	10.0822	5.34973
2.67265	1.44558	4.30589	3.56398				3.98068	3.63462	6.95636	9.17744	15.1889	6.9844				3.17873	2.93534		2.79883	9.3849	3.31352	9.33714	3.46766	6.22255
1.79606	1.48789	4.54995	4.18055				4.98337	6.52067	2.47675	3.0111	2.13324	3.36471				3.5506	6.22563		0.809235	4.70906	1.87051	3.23748	11.7571	3.30155
2.05129	8.44332	4.75318	3.00178				10.6249	3.37419	4.44626	2.74352	5.57415	7.39582				2.30076	5.77666		5.50519	5.97349	14.5077	4.9189	1.69205	5.17752
5.10966	10.4617	5.89912	5.17276				2.38822	3.84359	1.46602	3.73115	3.0914	4.50261				1.4991	3.22497		2.46956	2.02168	6.16157	3.92865	13.3345	2.53605
14.8013	12.4504	3.85739	9.54763				1.82213	4.25495	6.25943	2.32062	3.65624	8.07303				3.00292	7.71263		1.48248	6.09547	4.49145	3.52989	16.0218	2.0397
9.63887	13.9082	4.91588	3.76384				3.45339	2.49045	8.34042	2.71857	2.77253	7.91325				2.50856	5.72837		2.6941	2.87855	4.4612	3.21526	7.31523	3.96785
10.7651	4.99917	3.55121	4.64799				4.24966	4.04456	6.55062	2.45856	6.22574	1.70169				11.4196	3.23649		3.78766	13.94	1.98579	3.99091	3.1643	2.12874
1.47459	3.16622	3.54917	16.0516				2.66613	3.37611	2.31139	3.84577	4.02134	5.13143				6.45416	4.23914		5.95037	1.99009	4.43442	5.66468	2.29544	4.05537
2.0774	3.1259	3.4754	5.1725				2.70842	2.67616	3.81273	2.61378	5.83035	3.78919				3.58016	5.55799		4.85188	3.12321	2.31685	1.88384	16.2652	2.35754
1.82687	3.24001	4.86958	5.43377				3.34146	3.84744	2.21912	5.10337	7.34523	5.36257				2.8938	3.11446		3.96911	5.2196	3.14333	4.36727	10.3648	7.26411
1.44969	7.85067	2.51592	7.72851				3.86792	4.38416	5.16757	2.04528	2.50123	1.87837				2.65687	4.65616		2.54671	4.05301	2.50531	1.94581	4.70109	6.50373
3.05449	3.46638	4.44351	13.2839				3.15296	3.71915	4.35232	3.05921	2.52568	5.30991				13.6716	5.18041		2.48365	1.93482	9.43498	5.49168	4.24211	16.7334
2.15851	4.70031	3.7271	11.0855				1.96512	5.35942	4.85056	2.7166	2.82437	6.67225				3.92201	3.42747		15.1792	3.2628	3.69024	2.61943	2.52163	3.58172
4.15762	9.00691	2.46848	4.5495				1.96842	2.83941	2.56353	3.96932	6.60096	24.2157				3.16549	3.11835		3.24588	1.73572	9.34575	4.92402	3.90035	6.12986
3.96716	2.06876	2.45281	6.93726				3.40865	6.50211	4.28743	3.82596	2.61693	15.6129				2.88014	5.13126		6.07774	2.89883	10.0624	6.13801	3.36536	10.4017
2.39693	4.03276	3.30478	2.56718				2.01954	3.97584	7.51054	2.51816	9.78403	16.5397				6.51245	6.32566		4.8478	3.9619	3.87083	3.78703	12.7599	13.9395
6.024	30.7429	3.31441	8.27318				4.44781	4.65582	5.68134	8.98829	12.9382	4.54347				3.69944	3.5804		2.85081	3.42549	4.53251	3.03086	4.55162	2.87418
3.56857	24.5201	2.60966	15.2183				2.61993	4.67351	5.90497	1.868	5.15295	6.55609				3.28272	5.36215		7.48683	1.61045	13.539	4.04063	11.1415	8.35917
2.33641	5.29099	3.17755	3.10843				15.5476	2.83487	2.79817	4.55723	4.55121	6.77423				8.2851	3.74233		4.04299	7.08984	13.7963	3.07516	2.71881	7.8274
1.78316	2.29419	5.22658	4.22436				2.82297	3.12478	2.14576	9.13436	2.49752	3.5779				3.60449	9.79657		3.95316	5.29266	9.74753	4.45962	10.6757	4.73281
7.83352	5.39222	3.15186	4.39797				4.32458	10.9868	2.51852	4.70758	5.47238	4.66527				2.43592	2.43848		3.23985	3.3003	4.15868	16.605	3.356	4.19573
3.25094	8.17764	3.21911	2.50718				2.3895	4.04781	6.0702	3.83227	4.219	8.86642				3.95464	2.79407		3.87396	1.96058	3.91855	2.21919	3.73043	7.63735
5.26457	4.48939	1.56651	3.03366				1.92478	4.88274	4.23679	10.7058	6.25499	4.8767				3.93699	5.12732		3.0127	3.80897	4.48927	1.65596	1.41039	4.63986
3.35016	4.79672	3.86397	7.11636				3.59281	2.84841	2.76801	1.79241	3.83054	3.90123				4.16432	4.07		4.1008	3.8393	5.62624	13.378	5.10945	7.37282
1.5846	2.52114	1.91703	7.43314				6.4984	2.01567	4.36965	3.2776	4.21267	3.56296				4.92092	3.94253		6.03186	2.03679	6.8307	4.62462	5.9368	3.5746
4.17847	4.48173	4.81253	2.65654				4.61627	4.58064	2.58057	1.96229	6.21474	6.50239				2.78783	2.35924		4.42363	1.43485	10.4339	11.4411	16.3135	3.32635
6.13052	3.54679	6.8252	3.92301				6.68486	3.58467	6.1812	2.41104	3.41071	3.34982				10.5342	6.83714		3.5307	7.09648	6.6766	5.46675	6.81908	4.86433
4.8678	2.4345	9.27262	4.12812				3.66706	18.7104	8.16999	15.7829	4.49129	6.72037				2.56599	1.4695		2.49344	1.72732	2.11392	6.64554	3.66728	8.9383
3.9684	5.45929	3.36405	3.68352				9.04185	5.26311	11.3777	5.20418	4.98319	1.63032				3.2637	1.30809		5.2112	5.27717	1.19677	12.0034	4.35483	2.68512
2.07796	6.76095	3.00397	4.95039				3.8309	5.15053	5.26525	14.9593	5.74184	1.27774				2.54954	3.19041		11.729	3.18263	9.527	3.188	3.16513	15.0017
2.24023	2.60062	3.97991	4.0207				4.08529	1.13282	3.44287	3.10051	2.69104	8.47327				3.32297	3.00433		5.7603	2.95395	11.6013	3.36638	4.45399	9.28651
3.1887	3.3692	5.04504	3.74065				4.36261	6.13822	2.50097	5.27908	2.87943	8.81758				4.29224	8.16398		2.9382	3.75745	11.7112	4.69755	2.73617	5.44602
2.46385	5.91849	3.27888	4.33631				5.06273	3.93333	4.75771	9.21262	3.45375	11.4826				3.27884	2.68292		4.37069	3.40002	5.02493	7.09545	4.20736	2.99614
2.38283	2.78383	3.18138	3.33975				4.1509	4.28035	7.16904	3.66948	8.84146	6.99636				3.60381	1.76674		7.20143	2.10833	10.2867	4.47373	4.15686	3.50143
4.88975	2.26744	7.08855	5.99486				6.71508	2.91311	5.80348	3.72553	3.04818	5.3706				4.65847	2.56461		2.91773	2.72874	11.2508	2.67243	3.99757	3.25996
2.76521	7.54756	3.30086	5.21138				2.37275	5.53982	7.97469	3.66594	7.43261	0.976956				3.8038	3.48432		6.14944	5.80168	3.936	2.81678	6.92109	4.06198
3.66994	5.57178	3.79687	2.04211				1.87229	3.85985	3.94327	5.0614	6.53937	4.59671				2.3012	8.50866		9.86343	2.33031	4.67747	5.06569	5.8229	4.77468
5.22001	3.04562	5.71383	2.71203				2.81991	8.17073	3.66831	4.88575	3.26454	18.1288				20.3261	5.19773		4.1284	3.75216	2.84994	11.0006	3.77731	6.94594
3.58907	10.6334	4.36143	3.49385				6.79436	5.40959	3.18193	6.26219	1.4496	2.40065				6.41044	4.38986		2.55631	2.62212	12.5683	2.43775	5.0177	4.38846
7.1713	1.6073	9.66695	1.84561				3.40628	4.18882	3.94408	4.49853	3.17318	6.55679				17.0189	5.15251		5.47228	2.54842	6.07236	4.96077	6.47593	6.01032
2.11228	6.02555	1.73743	8.24306				7.01745	3.00987	6.25405	2.70898	5.54238	11.6663				3.45937	4.29171		4.9915	2.82491	9.87474	8.97272	3.22569	3.87861
3.68301	1.63158	6.63196	3.18199				2.93573	8.52546	5.55129	3.26329	2.75016	2.52752				3.2208	2.06732		4.48046	5.61876	4.09369	2.46601	3.72001	7.27489
4.20666	1.297	4.26447	3.28771				4.87312	4.22013	6.4206	2.81089	2.88094	5.79625				2.29496	8.61619		5.81815	1.78033	5.72819	3.19627	11.3017	6.81144
2.62952	2.97041	8.39902	13.8369				3.541	5.27735	6.10693	2.01721	2.86578	7.24536				3.24774	12.3881		4.63123	2.19754	5.74746	5.53305	3.05715	5.16603
4.61848	2.16441	6.90439	5.15179				7.97988	5.46933	19.9256	3.80784	4.83492	9.6098				2.51627	1.4071		4.78237	8.0725	4.25216	5.13299	16.2777	9.69785
3.24082	2.98765	3.66034	3.93915				4.15774	3.80948	6.03853	4.93318	4.67967	6.74077				4.6498	2.55007		2.76502	2.14086	8.83848	3.35845	6.02449	5.78509
1.04522	3.19911	5.90091	3.1299				2.67698	10.673	3.60967	3.8788	6.67235	6.83483				9.95428	4.57814		2.70454	3.86851	8.5187	4.39262	21.718	3.37393
4.85169	7.51107	6.42185	6.51015				2.9393	3.95705	3.37622	3.35408	11.6643	6.41928				4.25029	4.7942		2.69619	8.03342	3.51385	3.4735	3.20555	4.31795
5.115	4.0567	2.90146	3.06417				13.1808	4.58753	4.51889	2.62533	2.7066	6.43105				3.64982	3.51434		1.78203	2.45216	4.88677	4.83049	7.24044	8.9665
2.96323	5.37694	3.14361	12.0146				8.97963	8.01176	6.1426	1.90875	3.39093	1.73428				4.96456	4.50728		4.96092	1.611	8.83854	5.58233	2.90493	7.67294
1.77183	3.26281	15.0428	6.27488				12.2362	5.12322	5.2574	2.8721	4.59393	2.81356				2.89817	5.20113		2.69135	2.7441	7.35162	3.45766	3.56807	3.80638
2.49491	6.28158	5.56951	11.8297				3.73134	5.59243	11.1781	2.31326	10.2537	13.839				2.9567	6.25144		4.21055	2.02173	8.48706	6.70607	3.89225	3.3181
3.12325	2.30901	3.02433	26.8665				2.62897	8.23998	4.88336	3.30673	13.5475	8.90796				1.28401	2.93352		6.41113	1.34649	5.6183	3.33508	3.07643	6.67103
3.62846	4.48486	2.00865	2.61306				5.09348	2.91056	13.3538	2.59481	3.99462	12.4372				1.20151	3.94086		2.38231	3.30378	5.60677	4.32465	5.34287	7.73404
2.64862	3.6166	4.55509	7.78542				2.34847	2.62129	7.32984	2.80284	2.18439	10.4411				2.63472	2.81694		2.50014	3.1739	5.95302	3.91224	2.27527	4.1498
6.65386	3.3218	6.70997	4.59422				2.88392	3.48105	3.32926	3.20693	4.39735	4.30922				2.87888	8.98394		2.64963	6.11171	6.74455	3.24676	2.56893	3.17036
4.64285	2.60636	4.40995	8.14031				5.79068	5.1828	3.62715	17.9301	7.889	7.32913				9.28147	3.84894		2.17838	1.71364	3.19416	12.0378	2.41519	5.71957
5.44709	1.41725	11.1895	6.07618				4.56653	4.25298	12.4931	4.48929	2.55416	3.96986				3.23373	3.32909		2.83819	3.13573	3.95791	1.56991	7.15096	14.511
3.54626	11.6539	3.77268	14.443				4.43771	3.27394	6.95599	23.2968	3.16992	5.07846				9.18672	3.82219		4.27283	6.67634	4.49947	6.92255	4.99084	7.84197
3.59084	3.33643	4.95055	5.28258				2.86381	4.14713	2.34764	8.82363	6.39774	6.10171				5.37212	3.64052		7.41182	4.22008	10.2241	2.82028	4.93861	3.86414
3.36343	6.76981	7.7572	3.35958				3.81091	6.15377	28.2997	2.19771	2.73449	22.2698				10.6241	3.91364		11.1075	2.70319	3.28715	7.3641	8.07578	2.07316
3.88934	3.23138	2.98985	3.59014				2.65188	4.31919	1.63419	2.3089	2.32484	5.22949				3.42069	4.11737		3.76735	2.37745	10.6668	3.98276	4.87834	8.97379
3.15484	1.66826	2.10993	5.28025				2.73215	8.5872	3.20948	2.60115	2.62702	4.55773				1.76496	4.19064		3.28096	8.91286	3.89359	10.7916	21.2048	11.8723
4.93489	2.58491	3.2108	5.04179				1.8058	4.0123	6.67034	1.57865	5.11778	11.7557				1.26119	4.7977		6.91855	3.88793	2.10779	3.05432	5.85881	8.72231
2.99696	4.12283	5.01689	5.03687				4.04003	11.5311	3.9331	5.32395	4.2998	10.2861				5.04587	4.60312		4.17335	5.02503	7.28974	5.8058	11.6539	1.98727
5.41079	2.69175	1.55147	5.30465				2.74793	4.11127	4.20616	3.3428	6.43838	3.80072				10.4525	5.66132		2.95106	2.82389	1.41489	10.1197	3.70124	4.28791
3.03784	2.33992	2.6652	3.91658				4.65541	4.78216	7.95041	3.07586	3.00966	3.30655				1.76257	2.59585		3.93414	4.07818	7.20864	3.45417	1.80471	7.64902
6.96688	1.10751	5.89695	7.37285				1.43242	9.26466	2.55398	4.77538	3.64779	4.08419				3.5191	2.1526		2.568	3.07424	6.81886	6.66537	2.08961	7.52428
7.63095	4.05338	8.03069	4.07475				0.991843	4.98472	7.31307	3.7451	3.42038	9.16891				2.61152	1.87913		3.34128	12.4909	3.4074	6.47274	2.79109	2.70601
3.56023	1.10553	14.8196	4.55643				1.50281	3.38346	4.15006	3.78399	7.95742	4.35132				4.18218	2.35747		6.45601	3.26504	3.33033	7.73081	4.67972	3.30109
5.22865	3.36987	12.9806	9.79948				9.82668	4.77302	3.08132	3.42101	2.89003	4.14427				2.57237	3.20079		2.72366	5.28981	5.24837	3.14672	7.35527	4.77925
2.38208	2.87072	3.63677	10.4857				3.0801	4.40655	2.18844	5.32296	3.95685	6.08257				3.67019	3.46455		3.31487	2.47501	10.9237	7.62742	4.63784	8.44877
3.37306	2.60385	3.72539	1.28483				4.49535	4.16557	2.79834	3.22121	5.0276	5.45124				5.76163	8.16195		4.56618	3.13478	4.63389	8.3294	4.05447	4.8764
4.91387	5.98688	3.9267	5.93661				7.23105	6.50508	14.8571	5.51369	5.78987	4.66048				5.10259	5.53247		1.08602	3.23736	5.72802	2.42812	3.91617	7.95562
15.8162	2.82392	4.08268	1.70507				2.60836	3.04458	5.03308	3.37313	7.95776	2.64462				6.12844	3.40276		3.50682	10.2137	6.03044	12.965	4.58671	6.69606
5.09865	2.78818	3.71125	4.67089				6.26003	13.0463	7.73336	8.12239	2.41401	8.29425				7.71512	7.21116		2.5351	7.3673	2.72176	7.68645	9.42388	3.21576
3.66909	1.39279	6.19878	6.34246				3.225	9.28021	2.69313	5.01765	5.51317	4.42645				3.54335	1.59758		9.35272	3.59339	8.00932	4.72793	10.6793	7.83774
2.46887	3.22112	3.49701	6.39434				3.23015	4.69698	8.3951	4.71331	2.83275	6.9839				3.92283	0.670129		9.33182	1.44922	4.29386	4.25314	9.81376	6.47289
3.12819	3.23962	3.64401	3.23533				4.8955	5.3688	3.2965	2.80313	3.17053	4.74906				3.35814	2.34045		6.95978	5.91677	8.93388	3.12441	5.80797	2.32805
3.08481	2.47169	2.95953	6.69293				4.71023	4.31052	3.48526	3.0677	4.90302	2.40818				10.0958	1.57837		9.81348	1.37643	5.79644	5.08937	5.4051	8.09099
14.9998	6.56786	2.72637	6.57391				1.97565	3.35364	8.12687	3.59866	3.60535	10.8362				2.03814	22.5512		15.4951	2.99403	6.48385	6.51627	2.22289	12.5227
5.60344	2.5857	1.61515	2.75745				5.47997	7.81468	4.97361	5.70192	3.78212	10.6237				1.56952	2.67754		6.39446	5.58524	8.9388	3.20035	4.38112	11.8402
2.75805	6.83863	3.43829	2.43355				2.07156	3.3889	4.63234	2.07133	1.58289	3.72354				2.67006	2.09047		3.70745	5.28462	10.5154	4.46744	9.60542	2.06623
3.70025	1.9206	3.61281	9.35084				2.09016	3.83394	9.18605	3.62062	3.65674	2.40784				15.6863	3.56733		5.39891	3.8979	5.82467	2.9506	4.20791	5.14101
1.66427	5.91261	3.33842	16.2906				5.0145	4.96166	4.4534	5.55465	3.68473	14.1428				0.971654	4.20592		1.1799	2.77578	2.17363	0.8037	1.68366	11.2662
2.3108	3.24366	8.52889	6.93294				10.4774	3.22832	11.2725	1.681	4.18187	0.492953				3.3543	4.93858		4.46743	4.90685	5.46379	14.816	0.778252	3.2111
11.8346	6.73225	3.57211	7.56673				3.51376	4.12864	10.4965	1.75951	3.97723	8.51957				3.90989	3.73453		0.846732	2.70443	6.436	12.61	4.66766	2.13207
1.02981	20.6753	4.82371	3.68861				2.96434	5.63932	5.71717	4.14299	2.78015	4.87003				2.49514	10.0186		4.39088	5.37075	8.65695	1.56613	2.60169	1.26413
9.69972	6.89805	4.82206	1.09554				3.30983	4.40476	5.11621	6.10515	2.12613	4.16229				6.93029	2.21274		3.27077	3.85255	9.52365	8.97081	3.14136	2.69547
2.52832	3.85474	5.62084	2.32865				1.72112	11.784	4.49639	2.14157	9.26367	3.53362				3.94847	4.69891		2.99616	7.19085	6.49744	9.08985	6.21353	8.23953
3.57474	2.80953	11.5905	4.88873				3.07513	11.1998	6.08655	5.88523	5.40695	9.62766				2.07917	3.02496		2.24575	3.72464	6.35061	8.65179	5.81304	2.91004
3.20184	5.73688	3.67764	8.05839				3.57854	4.6023	2.1761	3.38532	1.52071	14.5469				2.45524	2.84104		3.971	4.42369	14.6536	4.46092	3.42774	10.8102
4.20056	6.34159	3.73668	6.08774				11.3565	3.83568	5.8996	4.51846	4.14812	4.23237				3.37221	4.36795		5.08563	5.96795	12.0156	1.69634	7.47326	5.60662
5.97359	4.88433	9.66252	1.84402				2.39015	3.57128	6.76666	1.70727	3.12805	3.99527				4.59545	18.911		4.34708	2.74645	2.17162	5.81683	2.66445	4.92185
2.67976	11.1028	2.39719	2.74722				6.05223	4.16862	3.71385	7.42868	6.64827	8.3967				3.83005	5.66641		6.44409	3.21937	8.62358	2.03575	4.09695	3.82437
6.56426	3.20158	2.12145	3.03671				2.99977	12.3748	6.28295	1.89913	19.601	19.0436				4.33126	3.78057		3.38288	1.73397	3.54032	3.81439	2.3242	3.82107
2.87374	3.8475	2.83371	10.3084				2.87554	5.02143	20.0949	2.13934	5.15169	4.35269				3.80574	3.07213		3.091	4.1328	9.01237	3.71159	9.98859	1.18398
4.36494	3.4937	4.85549	12.4195				8.59649	3.02488	7.21479	3.3309	6.67373	2.0601				7.6534	13.5824		3.7772	2.46379	3.46886	4.07606	1.73527	3.22326
9.42025	4.28113	6.15505	4.84729				2.46734	2.858	7.51867	4.29025	5.38027	1.51294				4.41707	3.44255		2.03105	5.46452	2.3012	3.14492	2.99024	4.39879
16.8144	2.77761	3.05164	3.31938				3.47214	2.49928	2.31801	3.7452	5.20803	3.47553				3.96983	3.50358		3.46874	2.58033	4.22486	4.41977	3.23875	4.5739
14.6059	2.74091	3.6932	2.59869				7.43597	2.42366	4.51699	4.2881	5.1921	12.2581				5.02885	10.9729		2.40123	3.83663	6.13532	7.06504	1.96987	3.84762
7.18768	2.75332	2.8595	2.66398				12.4834	3.7809	9.46493	2.93007	3.28564	4.91896				5.32185	1.45456		2.13963	6.88546	8.89954	5.26244	3.28724	6.43644
5.54323	2.87536	2.30289	8.39793				3.84501	1.89653	5.05314	3.76437	3.14407	4.02673				5.16183	3.37391		1.63009	3.37942	2.49939	4.32668	2.65503	6.6793
1.7261	3.09009	2.0556	3.52501				3.28142	4.16942	1.36042	2.69464	4.55703	4.58701				8.76741	4.66979		4.62664	1.83349	8.96988	2.34307	3.68431	4.57536
1.65219	6.41386	3.27179	24.6166				2.29651	12.7799	5.35703	4.59797	5.22971	8.60154				2.56075	2.8521		2.04095	3.01212	6.25531	3.10647	6.27988	3.05758
3.08963	1.27678	1.8329	10.6164				8.42734	10.3739	8.45322	5.9655	11.8576	8.41554				16.0975	4.65491		12.4197	3.37704		3.88179	3.19474	2.3065
0.719743	15.3117	4.72134	2.75443				7.2096	5.11793	2.60101	6.47862	3.02341	5.74341				5.54035	4.0872		1.69679	1.69713		4.49029	4.42419	1.38253
4.25654	4.31615	2.48804	1.41417				6.02009	7.14268	2.78213	2.70632	3.12562	4.21239				9.75975	2.66266		2.24224	1.68936		4.6612	6.33053	6.19062
1.44366	14.8071	5.71538	2.54844				3.47793	9.91966	4.08348	3.52029	7.72526	2.07704				4.15961	3.52412		3.58309	4.5116		6.49862	3.97941	7.61587
1.94675	25.4621	3.72478	3.63477				4.51102	2.34298	8.52752	4.97843	15.6225	4.24378				6.40003	3.74708		2.54749	4.25773		7.9328	5.45062	4.95597
4.41302	9.40093	4.02057	3.23339				3.80296	5.43419	6.48443	9.27204	9.32794	6.55248				3.8664	3.15313		8.87851	2.10321		5.02343	3.04175	2.39646
7.04429	5.79338	5.23044	4.89699				11.1275	2.09179	3.0196	3.68091	14.7864	11.0998				2.31216	1.92682		23.4711	2.70063		6.09055	3.91413	5.76718
7.32398	3.05249	3.47459	6.12686				5.27055	4.72825	3.63275	9.11282	4.09351	8.67854				3.40152	5.58501		6.96529	2.89547		12.2635	2.9207	10.4416
4.74341	7.02957	3.66459	2.41373				8.85695	5.61811	3.2151	1.96121	4.11435	5.14738				4.66943	1.05503		5.56254	2.91731		6.73721	5.48728	2.55997
2.80314	2.35894	4.41797	2.75435				3.29394	4.63048	6.46295	4.15299	8.8414	3.66314				7.91687	5.67798		2.93199	2.92907		8.97905	4.30013	3.89225
3.79595	4.08613	4.07279	7.20268				15.6349	5.06874	4.16449	6.21187	2.10069	4.40406				2.4869	2.68444		3.36834	4.25996		2.97966	10.4763	6.38337
5.65926	3.80606	2.3878	4.13958				3.70734	10.7136	3.80482	3.55648	3.56991	8.0939				2.06246	4.00461		4.47048	2.80655		4.60716	4.80963	9.65241
3.5385	2.08649	2.36737	3.21823				7.4307	5.01992	7.62691	1.53197	2.97237	9.33718				9.65137	2.19706		3.49065	3.69316		3.23443	3.60761	7.00871
2.16713	2.74618	2.69216	2.72367				4.59405	5.28484	4.61569	7.96259	8.91509	6.52624				2.31923	3.2456		1.07908	3.39273		1.92479	3.00095	4.2891
4.4433	2.32285	7.02028	11.0447				5.40844	4.852	6.73343	9.18648	2.78661	4.7472				3.25069	3.92049		3.82087	2.2486		3.54701	11.7853	2.39676
4.93573	4.88307	6.59685	3.02137				3.28937	4.78996	0.987632	3.84501	3.81681	13.7084				3.60614	12.1944		2.85741	2.89277		3.08247	8.54382	3.7285
4.40688	3.28594	3.38894	3.88628				3.27894	2.14873	8.00232	4.2672	3.01506	4.0289				3.7003	11.1541		4.29825	3.08071		3.97409	11.8511	4.71237
2.23625	2.31152	3.25662	1.34397				2.5014	3.85517	1.30397	4.1406	2.99151	9.63208				2.51365	2.10622		3.58399	3.72315		5.35393	4.68157	11.4215
5.46189	7.57486	3.66078	10.5459				3.4016	2.44259	14.2526	5.82542	5.17341	2.41585				3.9752	6.81781		5.09693	3.77555		5.7374	3.78109	8.13665
2.01001	4.05423	3.37074	9.20146				5.37289	4.74725	8.18822	2.7361	2.42375	2.34354				2.56938	2.04828		4.07288	7.76477		10.5432	4.24549	6.96533
1.85009	1.77054	6.9698	1.36676				3.58089	8.35176	6.83839	2.80675	13.491	8.86524				3.02474	10.5782		4.69868	4.03208		2.82041	3.82376	5.83045
2.36512	2.11346	0.879383	2.83502				5.74311	4.56102	6.79225	1.84204	3.83571	2.69805				4.82876	2.50944		5.00197	4.99409		4.28101	3.18873	5.09413
5.59331	3.29871	2.97041	4.0729				9.95102	3.00141	4.07321	3.87209	3.97502	4.32926				1.62067	5.78696		1.59503	1.93029		10.479	2.32125	14.6883
1.78058	1.95484	3.49822	3.19697				1.95042	8.79346	9.83032	3.26384	4.21444	12.4998				3.87145	4.69276		8.66642	4.0487		13.6581	2.99535	11.0517
3.71518	2.44906	4.65311	8.74514				2.05078	3.14765	5.68454	2.9333	3.4635	1.75289				1.63202	7.7894		3.43314	7.97828		5.17597	2.10406	9.38853
2.13997	2.33644	6.47182	3.06428				13.7992	7.61477	3.58416	4.14065	4.44922	11.7023				3.22819	3.30352		3.91013	7.59817		0.655905	4.09582	2.51521
1.11338	2.94424	5.44059	3.54901				6.83715	3.77699	3.10533	4.04799	5.69528	3.07649				3.95191	6.78358		2.76848	5.03655		5.11039	13.3921	3.49142
9.22515	3.21188	4.58262	4.19207				1.71243	6.30852	4.05162	4.12435	3.61367	2.06905				4.70206	4.81848		2.67068	2.44675		11.7654	1.61657	1.68546
3.80327	5.04313	4.24324	4.01965				9.25191	2.95163	7.8407	2.09809	2.63677	4.37873				0.943069	1.68756		2.53749	3.10916		8.16927	24.9086	2.12245
3.04299	6.8164	2.86106	2.84231				10.0806	4.38417	10.5847	4.12225	2.76392	7.8231				19.4477	5.00823		1.54211	5.39058		4.3724	3.59674	4.63339
4.78716	7.48613	4.20459	4.56029				15.9979	8.73064	11.9475	5.18168	5.50329	3.25807				3.26463	1.42049		3.35309	4.64672		2.09225	1.35177	7.34654
4.35293	2.90344	4.39692	5.48895				3.53043	19.727	2.42249	4.15208	3.0903	2.91661				3.39221	3.43164		2.49767	2.10044		3.10836	6.07507	3.68467
1.65564	16.6921	3.13421	2.84738				3.54467	5.08918	17.7187	3.54231	3.50236	5.55504				2.46549	7.01885		2.56502	8.03081		2.75916	9.5632	3.86322
1.62054	3.52282	6.38522	0.993287				3.66588	7.47289	12.3849	5.20548	8.41668	1.36475				2.77846	2.9581		3.73863	3.64206		9.80182	4.05852	9.3675
3.23275	3.72831	4.03368	9.45549				6.77559	5.01527	9.88093	3.6522	11.0608	4.83372				4.05953	6.34183		1.1808	2.64835		3.98922	5.4981	4.75528
2.82801	4.15735	7.24127	2.1239				3.17952	5.8538	17.9548	5.4161	4.13598	4.81287				6.79336	7.59374		3.41662	3.19817		2.67506	2.52537	8.61231
3.08889	3.06369	4.68306	5.81706				1.85521	6.96007	2.1733	2.54091	4.12323	4.43703				3.34787	6.41601		2.65699	3.52584		4.2339	5.91813	3.0607
7.16805	3.65661	4.18215	13.8571				4.21324	12.9646	1.07601	4.54176	4.3555	3.05756				2.91265	2.08406		2.71657	2.89121		7.02213	5.58878	4.44045
7.43982	3.64742	3.32736	4.4533				2.92698	2.66671	14.8954	6.61515	5.92374	5.22635				11.8835	2.9575		2.95233	2.71286		3.74578	4.96881	1.25632
14.0082	6.82417	4.78842	4.27011				8.42806	4.87592	8.51403	3.70289	5.37412	6.75992				3.08809	4.44604		3.54279	3.06544		3.30876	7.0477	1.8436
4.49509	2.50524	2.98121	14.1073				3.37561	6.54181	2.53299	5.46525	2.17569	0.805686				8.36672	5.17196		3.71565	1.47012		7.21656	4.07639	6.44302
12.1605	27.9177	10.1357	11.3856				2.48377	4.14338	4.45956	2.46772	7.44289	3.39079				13.352	3.03382		3.55933	2.48802		7.76177	6.29338	12.6602
2.02545	4.57318	4.70133	3.33739				9.27084	3.22186	11.0324	8.62152	1.99684	2.21265				2.46724	2.78382		4.00595	2.43201		6.86779	4.32675	2.20305
2.17425	7.43048	2.33696	4.46159				8.67337	6.15608	3.46823	2.5661	8.04733	10.8005				4.74975	3.48764		3.33409	1.95081		3.79355	4.00137	4.18302
3.66059	2.18086	4.22519	2.06816				5.01454	5.03995	5.3284	1.08396	4.95638	2.739				1.77108	2.40019		1.83095	5.31705		3.57028	4.23181	12.2432
8.23318	6.03936	5.95551	9.50619				3.16491	22.1985	9.33263	13.0009	2.23644	3.0836				5.7867	3.35881		2.72557	7.04871		2.69275	3.7721	2.81255
3.58911	2.75495	11.8061	2.21178				1.71491	11.7708	5.29174	2.85685	6.35695	5.15756				3.80587	2.7566		3.20405	2.93913		2.38403	18.1718	8.21937
5.42048	4.55536	2.26473	14.8758				3.78229	5.20516	12.4262	3.886	3.31701	4.56712				6.60587	9.06451		3.91602	3.33621		3.56138	8.40332	2.74181
3.6881	5.77844	3.6413	27.5886				7.93118	3.2637	5.70636	2.90377	4.26957	8.13527				2.98843	6.66091		17.8111	1.69995		7.10532	3.58131	3.66524
4.56376	3.51276	2.72998	5.95251				1.4867	2.84373	7.77872	3.54025	3.90183	3.39179				2.92408	4.56004		1.11805	1.98327		2.11535	3.33618	4.37622
2.01075	1.96414	4.11527	4.2856				3.069	5.91084	5.50072	3.94273	3.4345	4.14932				4.13034	6.42668		3.03455	2.49537		3.7187	18.4676	4.67688
13.9699	11.4433	6.36421	7.61938				2.86979	2.41318	0.719501	3.48319	4.14001	3.66064				3.27485	3.29537		13.3563	1.68935		7.25097	4.78014	5.13952
2.21324	16.7434	5.0147	7.55388				13.9275	2.86894	3.4321	4.65945	5.37852	3.01173				14.9839	3.9064		0.952203	15.3604		2.8142	6.06354	22.1916
2.74669	4.62595	4.0272	4.5168				10.799	7.20881	4.45236	4.26635	8.37872	6.78558				3.9143	5.96518		5.40472	11.7672		2.25414	7.90679	11.4889
2.39166	1.84739	4.33572	3.44535				1.8222	3.21993	3.61205	4.87906	6.6247	4.22047				3.99475	4.31787		3.81529	5.6795		2.96178	9.23033	6.8691
2.85239	6.76362	5.57848	4.0711				12.7043	3.03105	3.94128	2.92727	5.44425	2.82494				2.9904	3.9197		6.32813	4.15802		4.42002	12.0096	2.96486
4.60837	2.95891	3.39017	3.83544				1.50207	4.79901	4.24641	8.03127	5.35863	3.56324				2.71895	4.92153		17.8684	2.93853		8.03194	3.06124	5.15893
2.5925	4.12915	3.73692	2.72735				5.97668	11.1337	2.82508	5.29697	2.80184	8.14618				1.95986	5.26568		3.48888	6.34534		5.17177	11.1716	2.61142
2.28691	6.10698	3.89201	6.0468				4.28054	5.98119	14.1032	2.00641	3.38925	2.967				3.33176	7.25329		3.75043	5.43524		8.06629	4.04888	8.47131
2.20889	4.30208	4.49613	1.64157				2.71761	8.67273	7.03817	4.19271	4.0622	2.36778				3.19155	3.09273		4.66894	3.36362		2.40806	5.24282	2.33797
2.49065	7.47367	10.7759	7.96753				2.94964	13.3715	5.74203	6.50519	6.29556	15.5302				9.56876	5.58706		3.37429	3.04856		1.96327	3.11812	4.83111
3.56425	2.93678	3.26399	3.02287				2.61988	2.38632	14.9012	3.91233	4.6691	2.53183				3.47645	4.3677		3.19593	2.68512		10.3362	3.51087	6.67131
2.23327	8.82304	3.74912	6.41794				2.41617	7.31285	16.2179	2.28263	2.00252	3.53434				4.07575	5.15372		3.38981	2.70039		15.3974	7.47293	9.91788
6.54864	6.7193	2.29794	6.10585				2.38657	2.27315	2.34441	5.08166	1.92519	21.6427				2.54648	11.1775		2.97161	3.13314		3.3392	7.57268	6.02927
3.44172	12.2541	3.95279	19.0861				3.36074	12.4455	3.19289	1.80633	6.84628	2.89946				4.14932	3.4973		3.18216	5.15113		12.3819	4.85099	2.7718
2.63258	4.60693	1.69829	3.02096				6.45918	11.203	0.640339	2.02459	12.238	2.89447				1.78038	2.34093		8.21909	4.91745		4.60658	7.4127	5.09963
3.06451	1.27012	3.75678	3.13197				2.73779	7.79713	7.05525	1.91069	9.1616	3.97756				4.17817	4.35529		1.41078	3.22919		5.44872	5.40298	11.9366
3.64841	2.85742	2.05553	5.04597				7.8282	9.87709	4.34107	13.6852	2.63107	2.88301				1.94442	4.8351		4.59719	2.15309		4.98792	5.48169	4.73608
3.67439	0.634615	8.25896	3.70558				1.47927	4.07676	3.7009	1.52528	7.36658	4.06104				4.81414	9.29801		2.39033	7.6967		1.68459	3.28899	4.17316
2.57374	3.34329	6.77033	2.54206				15.0614	4.7785	5.38136	1.87837	4.44775	3.27432				3.94859	5.64341		6.65702	2.26504		3.60978	8.9368	11.9372
1.92665	3.11923	5.2387	2.61064				3.52989	1.98984	4.83506	1.77288	3.8775	5.74857				1.117	6.39155		1.65069	3.02112		4.67232	5.79804	10.5358
10.3546	2.60409	3.66599	4.3383				2.5972	6.20064	4.04989	3.08554	2.55268	4.08915				5.32309	3.90396		4.27954	3.03484		2.78648	21.2679	4.0649
3.96212	2.30692	4.20446	7.78296				14.2667	7.27417	10.3776	5.38412	11.4724	6.60693				5.55121	3.21397		2.21394	10.5539		6.21143	7.54034	7.80567
2.87809	4.59295	2.95343	3.17261				7.68779	5.36187	3.49093	10.4102	2.95216	7.17917				7.39449	3.27429		2.83507	3.03171		8.02126	16.0271	5.61189
8.91703	4.11981	1.90214	3.27155				9.82226	3.48736	5.53358	3.56383	2.767	6.84566				4.95862	3.39237		2.28904	12.6923		4.72467	3.86413	1.76904
4.30612	2.76097	6.94157	4.5874				5.0089	3.82539	8.49627	4.08762	3.30075	3.78741				6.0236	2.98728		11.4572	7.92494		2.9138	3.26196	13.7013
3.30475	10.8306	3.74852	4.44119				15.7903	2.33545	13.9416	4.95717	2.63065	1.64576				5.03364	8.84023		2.50741	7.01326		3.14736	3.60091	6.41739
7.20079	5.4243	3.42561	4.73907				3.4059	2.73963	2.0829	4.32162	10.9672	4.59726				5.13737	2.35601		4.71174	4.25961		5.20426	4.13619	3.06414
3.16178	3.36962	2.81299	3.8087				3.24152	3.27758	5.28722	3.63712	4.05959	4.57496				16.1009	12.0181		5.1994	3.78047		3.10587	14.3068	2.08112
4.34745	4.83813	3.09037	2.55715				4.54415	5.74197	1.30575	2.95543	11.411	4.46672				3.10158	2.86255		6.29388	20.2031		2.55064	3.50831	10.8619
1.63858	2.99856	3.1199	1.38854				8.58074	2.6297	1.64761	2.4582	3.11875	4.42371				2.62383	2.22826		1.98183	3.13992		9.38475	4.32275	10.2173
5.12031	2.64565	3.29354	3.59852				6.33014	3.95544	17.1144	3.06861	3.7896	16.613				2.76	5.42124		1.65398	6.16754		2.31701	4.14163	6.84844
1.6369	1.08944	1.4271	4.21833				3.90077	12.9423	4.96146	4.36251	3.75106	3.37589				3.03887	7.04286		3.0104	2.18065		4.99352	3.86853	8.27872
3.44812	6.26486	5.95982	4.50423				11.4594	4.20671	2.15244	3.87109	3.20044	7.36453				8.99242	4.89133		2.18046	5.3411		5.15637	3.69114	3.31973
4.70759	0.914113	2.08996	5.00999				10.567	8.13386	4.2309	2.92815	4.66517	4.82753				6.06107	4.30125		4.53761	2.08932		4.32446	4.37817	8.07943
3.89365	1.93672	2.96597	5.02261				8.29906	1.66038	2.86036	2.42848	0.866648	4.56434				2.54753	2.60159		3.41294	7.12286		4.20983	8.86115	4.71546
4.80168	3.05292	2.12238	3.54515				1.80964		6.14858	6.04881	2.77474	5.926				2.79659	6.91968		2.75218	4.53776		3.24433	2.1212	6.20677
2.47035	8.47141	3.40955	2.23794				8.43042		4.37803	3.95773	3.45146	4.08247				7.61355	3.94657		12.1473	3.24944		8.10385	4.53803	2.8241
3.12833	2.98742	3.66988	3.54422				2.0025		4.81747	4.2561	5.23671	6.3831				2.40606	3.34992		4.08501	2.38912		8.57073	1.83425	8.88993
3.69928	2.86588	3.50007	3.51005				2.39076		13.9426	2.01239	9.02147	8.43707				2.66976	3.69602		4.59547	4.73674		5.37149	8.53984	2.70659
2.71324	3.07465	4.49508	3.22473				1.61105		7.54699	3.55898	2.95827	9.96754				3.383	3.18777		3.60441	4.76735		3.0479	14.5625	3.4805
3.07921	8.25101	2.77634	2.75408				3.09475		3.16596	8.54425	2.59899	5.41106				4.65976	4.58633		4.46303	2.32096		8.04403	9.01683	5.10731
2.96291	6.69539	2.89625	1.7502				4.46464		14.2534	2.15989	4.97246	6.49867				5.75344	9.48942		4.04013	4.28188		7.55633	2.09549	7.38016
3.15347	2.27316	2.94983	4.45527				5.66517		3.63847	3.82039	9.75894	3.85035				15.7417	4.53254		2.36429	4.71834		1.45048	3.51432	5.7056
2.12103	9.63384	3.47752	3.07465				7.56514		3.38986	9.69951	7.57123	8.89235				5.07777	2.24616		4.44114	5.39924		5.00342	8.58252	3.7398
2.23066	7.133	3.94915	9.28773				4.41491		7.26559	2.44237	3.48	3.22554				3.01475	2.84982		2.46122	4.62786		8.70657	1.59658	6.1959
1.72428	2.77277	2.39381	2.80982				2.76646		3.47175	2.65683	7.21588	0.844609				2.6481	4.10505		4.12491	1.22776		2.94416	3.51755	4.33484
4.81157	7.30628	3.64904	2.86416				1.83939		2.75778	3.49173	2.19422	4.3554				11.6744	7.02437		5.79786	2.08961		5.02806	4.57831	5.17671
29.884	3.05106	4.12219	3.59869				3.07316		9.03112	0.839309	3.43172	5.49323				3.19071	8.31831		3.33827	2.35094		2.49607	5.99553	6.20182
34.204	6.53928	2.61059	4.44886				6.53299		7.16201	2.94688	4.84279	3.19861				2.83133	2.42545		2.90391	4.12129		7.31947	3.4084	9.53768
5.65897	3.60482	6.43434	4.09307				11.4819		14.4909	8.02232	7.01385	2.3927				8.36137	4.70866		4.73168	3.72224		2.87043	1.86474	2.19474
0.980048	9.65008	7.4604	3.27268				3.37553		5.19772	2.12888	3.99596	2.88056				2.03854	5.51606		4.75496	3.15906		3.32881	3.95364	4.9071
1.44346	1.44949	3.7704	3.23292				3.24805		9.28115	3.31899	8.18151	3.81133				2.42264	6.61091		15.8201	5.80661		3.05063	27.0687	3.6289
3.3994	1.80378	4.38207	2.32563				2.82555		2.7144	4.58698	3.30976	2.61235				1.77486	2.71266		2.54109	7.13728		4.60391	2.17381	3.36936
2.6041	6.28763	4.88189	3.17934				14.0658		6.46657	4.43357	3.47058	2.82724				8.51877	4.46483		1.65641	1.87705		2.94268	3.40585	2.7799
5.11573	3.4864	1.32492	2.56775				3.67297		2.78559	4.03747	11.9345	8.20037				3.64104	3.51099		3.07089	7.87411		6.45006	3.35566	5.68498
3.51844	2.55825	4.60347	5.46211				13.3071		3.7878	3.34017	1.92365	6.45591				3.78978	4.18041		3.41786	1.89606		2.00428	4.70293	4.24935
2.4242	3.21814	3.58527	4.01508				2.74588		8.86927	9.63384	3.67959	5.11018				2.52461	4.86776		4.48035	2.78227		2.25979	1.99603	3.37964
2.97578	7.54678	4.29378	5.21907				3.57402		6.14031	1.87802	13.3236	2.96053				1.77704	2.58574		4.02082	3.43561		6.4711	4.35297	2.0166
4.15149	4.73496	4.47503	8.21258				2.77881		7.6567	1.95911	12.2696	5.64024				1.82523	3.20502		9.77645	3.05868		5.01558	4.6954	7.27191
3.56382	4.17998	2.48054	8.2149				9.33274		5.18926	5.00094	10.7578	15.0798				5.80732	3.7195		3.21519	9.42758		5.79321	12.2456	4.30792
6.46672	4.77726	10.8616	2.25655				3.51164		4.71362	3.63914	6.46677	4.71449				20.9161	8.75239		4.70174	6.76187		7.87211	3.75144	11.1717
4.46817	3.26556	5.37897	3.18605				0.890102		3.67268	2.60922	3.82085	3.96786				3.68139	3.96477		3.89625	3.34517		7.52238	7.10382	7.14213
4.29962	1.90348	7.9589	4.69843				3.55783		6.6246	1.56167	2.62937	13.0266				1.09091	2.23737		4.9125	3.33234		1.81834	2.24884	3.37765
2.39587	6.52878	3.84603	2.37395				1.86789		5.51967	1.60816	10.6183	1.62228				2.18259	6.12573		4.06191	4.16948		3.81169	2.03495	4.38813
3.73289	5.87158	2.61719	5.66793				5.4469		7.0468	3.41843	2.93453	5.89288				3.61649	5.7375		6.32533	2.81296		3.81141	1.53049	3.15722
1.61586	6.71171	3.58187	4.25542				2.30281		10.4229	10.4931	3.63165	3.46513				3.93703	5.78579		2.97419	8.22652		5.53188	4.88173	3.50664
2.82185	8.79069	2.91735	1.61291				6.61027		2.39818	2.06085	3.8259	2.33598				2.40453	2.03815		2.87073	3.50981		4.08344	27.4762	2.86182
2.37967	3.53432	4.6955	1.96195				12.985		3.28485	4.1033	4.45786	6.14662				2.71342	2.04649		1.3898	3.54498		4.64902	2.52507	4.57459
6.62326	4.09928	3.23597	2.29817				4.22237		10.0306	3.7505	3.19422	8.57838				2.63844	6.49122		8.72498	4.70014		3.61686	9.7275	4.16095
4.49252	3.89461	2.30721	2.20239				3.04554		4.12375	2.39418	4.50405	2.86061				12.2226	7.77655		3.10188	2.62861		2.54657	3.64259	6.01279
18.4665	3.39549	8.45228	3.12065				5.97611		5.96616	3.41909	8.4301	10.6054				6.6814	5.31273		3.99355	4.48373		10.0576	16.291	5.03121
3.27325	5.53698	2.23835	4.98543				14.8634		9.60499	3.18168	1.9925	3.47483				7.61102	5.78964		2.86265	3.62046		5.61575	6.02779	4.0548
6.75113	2.67698	4.50488	2.21992				28.2152		3.21523	6.47872	2.08409	3.62774				4.10779	6.674		2.13877	3.32811		1.96064	10.8035	18.9777
15.2731	13.231	2.38265	4.06464				3.09028		2.95516	3.78837	5.6164	2.99874				14.2568	5.33013		4.49129	5.59118		2.92426	3.19847	4.71563
6.19424	6.49838	1.58601	10.0084				8.72995		6.98449	2.95077	9.8721	3.44584				3.61528	1.08429		2.40212	2.88227		10.7487	3.67996	1.89577
32.5151	4.24801	1.18756	6.78874				4.94532		2.41997	3.91706	1.36008	8.37182				3.27505	1.8839		3.68753	2.30202		4.38932	7.5009	9.22668
8.23451	5.61571	6.9357	6.17721				4.82568		11.8295	4.75859	3.81485	6.78461				5.26771	3.07587		4.10881	1.86644		3.29356	3.42768	6.32573
3.08128	10.3999	4.38658	10.1093				2.90084		12.0802	10.5125	1.56422	4.23786				4.10619	4.28329		3.44065	2.62004		3.10844	4.05748	3.05297
4.11194	10.0014	2.93839	0.573691				2.6713		4.9252	5.8717	6.36733	4.51879				1.89054	8.64087		3.61185	6.57195		5.82838	5.30397	3.86825
2.88518	9.6714	1.304	2.41622				2.02159		14.8486	3.55967	2.52518	2.99451				3.39411	4.81612		1.34536	3.14646		4.41291	3.06575	5.78018
3.82688	3.00017	3.75129	3.65949				4.74467		5.02329	2.14675	10.393	11.2731				2.23102	3.92292		3.5895	5.07861		6.48026	10.9381	3.21653
2.14706	10.1899	2.77422	4.6736				2.2273		2.7296	3.34572	4.2267	15.996				3.22087	4.739		4.40763	6.85785		4.44081	2.54383	3.15489
2.96517	1.98504	5.48684	8.67662				2.7551		8.31634	8.59577	2.00146	4.88714				3.3933	6.36745		2.89096	2.21659		9.25312	3.74245	6.6709
3.90797	3.68194	3.35019	3.94203				2.27132		7.37761	3.75613	4.05134	2.11653				2.11203	2.58155		2.60476	2.9355		4.47715	3.10268	2.04358
2.62817	1.35445	4.14222	6.80537				2.79814		5.1802	2.86845	5.59111	2.32759				2.06764	6.20097		3.77094	8.49641		5.33199	4.47405	2.51421
4.66104	10.8167	2.7692	10.5999				2.06427		3.67763	8.6017	3.72903	15.2158				2.75804	5.97636		2.71049	4.52521		19.2466	7.23388	2.89996
1.33547	5.07757	3.01923	10.2573				2.25926		2.79905	2.56497	1.70043	12.288				4.27278	3.2615		4.76591	3.41507		6.76206	4.39355	6.85171
7.40092	0.96433	2.19281	3.57369				15.2384		6.56319	3.77264	11.7577	3.59028				14.667	2.8849		10.8572	4.02965		11.6584	9.46973	3.73145
3.55862	1.59324	4.93362	4.52611				3.38891		3.37372	3.57457	2.70157	8.73181				4.72363	4.85527		3.76266	1.30591		3.00925	5.5948	8.74297
3.53223	1.46545	5.07246	2.99007				4.39243		2.43694	5.2877	4.33533	6.52654				3.6253	3.01328		3.38827	2.94597		2.33573	2.65819	8.40011
1.80721	4.016	3.07945	4.32287				16.0026		2.49982	2.82157	3.43396	3.63471				3.94558	8.83139		2.28544	4.4571		3.2807	2.91064	7.39911
4.23279	2.65585	4.00838	13.8678				2.41718		3.72531	4.77929	13.0589	3.55936				5.27408	1.99662		3.54228	2.01055		3.00947	2.58579	2.39825
2.55796	2.99368	3.29397	2.06587				1.97286		5.30583	3.0433	4.1079	2.87091				3.44088	4.7387		10.3001	2.75064		4.21317	21.0974	11.9367
2.54941	2.72277	5.446	2.71229				2.52933		4.6496	2.14946	5.96232	6.91102				2.96582	5.92427		4.10282	6.34918		4.38515	3.29037	4.84961
6.53644	2.10193	3.89128	2.17893				3.25423		3.95043	4.81664	5.56275	2.93436				6.72037	4.26937		2.94203	2.5905		2.30914	4.61447	11.1727
2.54054	3.10019	1.54859	0.829429				4.32405		3.84995	1.25102	3.13949	4.59703				2.44751	3.39334		2.0828	11.4224		4.89364	8.37856	4.08338
5.07249	2.75903	4.32008	2.84764				2.99102		3.20681	4.62487	3.00448	3.14808				2.04728	2.5202		4.85344	2.08679		5.02226	4.28635	4.54289
3.29552	9.35252	4.84436	4.1169				2.11756		5.23278	2.65927	2.54138	2.84133				3.26793	4.50134		6.17833	1.97112		6.46363	10.3439	1.9641
2.25316	3.42045	1.25626	3.2322				2.66862		4.51103	3.10918	3.58446	1.64918				4.7211	2.88036		5.36171	3.79906		3.52711	4.62393	3.92108
2.77684	2.91084	2.19677	3.30795				5.29307		10.1505	1.43199	7.62888	8.67987				4.05992	4.38787		6.53005	2.56833		7.7995	4.58344	2.58543
2.61517	2.3912	4.45374	2.83055				10.0246		4.97489	18.1757	3.14306	8.67066				2.16064	4.20499		2.46118	2.81166		3.88745	5.7922	12.2634
3.53003	5.83509	3.03292	4.97172				3.28055		12.7387	6.30094	9.82262	2.35747				2.82553	3.80727		2.50939	2.69254		12.5247	2.05115	3.83217
1.18777	4.94526	3.95245	4.10662				5.71367		3.61712	3.84597	2.82325	5.96896				2.77876	4.20496		1.71241	5.74472		4.69386	3.94441	11.24
3.3194	4.42943	5.22729	4.82032				4.13257		6.4247	3.84737	6.15948	15.0245				10.3135	3.37716		2.53716	5.00887		3.23412	2.27517	8.40071
3.21544	2.33323	8.99861	2.66339				10.2403		3.52676	4.07445	2.43944	9.04927				6.04792	2.84411		32.2387	7.19639		6.15644	10.4631	4.24137
2.7588	7.87236	8.80609	17.6168				3.46359		5.52965	4.56902	8.97437	6.0837				6.20162	3.60428		30.2769	4.28516		4.30663	3.3375	4.38919
2.80119	3.03958	2.84774	13.1125				2.94319		6.68777	8.53721	4.70629	9.49149				3.29798	3.17075		3.91532	5.33496		2.75586	2.98269	7.88749
2.63907	4.22776	3.25273	1.76747				3.74416		4.19333	4.24305	7.42497	6.10918				1.25414	2.78561		4.62532	8.65742		7.06181	3.38559	8.17838
2.65831	4.46969	6.87121	10.5962				3.63099		13.2788	3.70223	15.6487	3.09278				10.7324	4.73436		4.33195	5.8046		4.82519	6.64861	8.3684
4.13263	5.15539	3.41265	9.55351				11.5316		6.63739	3.53661	2.62116	3.31365				9.13635	9.16646		3.5058	4.56034		9.22745	7.49986	9.10077
3.27252	2.32728	2.321	3.08064				3.97707		5.8454	8.20445	5.67922	3.26057				3.98614	3.08014		3.81154	6.50383		3.12148	9.43879	4.62709
3.56615	5.77914	5.63247	2.61254				6.04425		1.27651	3.0039	7.10798	9.42591				5.44834	2.04818		5.1142	2.41248		10.5321	2.13362	8.69599
3.33853	3.06295	2.27196	7.25214				4.06097		5.31974	1.9535	4.04754	2.13926				4.67227	7.24444		4.14734	4.70635		5.49908	5.29353	4.99674
4.49998	2.25898	7.90688	3.41668				1.95273		3.63673	5.21773	6.92136	9.6248				4.16487	3.36102		4.56254	2.74292		6.60426	4.26019	3.86399
2.71355	5.72982	2.5322	11.6809				15.5004		2.67358	7.41463	8.46504	9.81351				7.8423	3.23468		3.65612	3.46698		15.9424	8.0376	6.67623
5.71277	5.87919	3.49578	3.43869				1.71769		9.09059	4.78616	16.5145	1.22232				3.58464	8.52684		13.4991	2.32273		4.63844	4.61028	4.12006
4.50797	2.53791	4.4339	4.78631				15.5437		2.1916	2.21864	3.63599	6.87456				5.14076	3.06226		3.4537	12.64		5.30205	5.53888	5.3389
4.32939	7.75066	7.26476	9.48015				1.45269		6.92706	8.5065	4.43935	3.60298				3.12464	2.61233		3.88734	4.93511		2.7029	5.90554	6.73663
8.85949	7.35298	4.08196	8.84317				5.66844		1.46331	5.98934	8.03398	7.38289				9.37157	3.47763		3.11778	6.62371		2.40756	5.6339	3.91068
5.90566	4.61882	4.27943	6.42904				2.13107		14.4174	3.47564	2.52359	6.08879				4.38154	5.80103		2.08862	11.5613		3.095	5.09115	3.85782
5.90403	3.03612	3.3075	4.31589				3.12759		7.85071	2.71864	3.52495	3.66645				27.0998	3.55498		5.18601	1.55464		15.0032	10.4346	2.52611
3.53976	2.31214	2.50961	2.43393				8.69184		11.4933	1.84757	20.2895	5.10481				3.21959	7.06375		4.34669	4.79298		7.17687	2.16803	3.6512
3.51581	7.62426	5.41243	5.21567				2.35226		2.20226	2.78432	7.91888	3.00676				1.51984	7.43045		2.91082	2.37912		2.36075	1.94732	3.83581
3.56637	4.32845	4.11664	6.54211				2.76536		0.5751	2.45109	3.09571	4.22545				11.7721	1.72284		2.85813	2.03186		10.9089	5.94287	8.68217
3.19923	2.92171	2.80185	4.63898				12.3217		7.29583	10.1768	11.9098	5.30162				1.61447	1.89623		2.35346	3.2083		6.95371	2.63203	5.6328
1.59394	2.20586	3.03802	8.82775				4.67808		6.35329	3.41715	8.14226	2.98953				5.1024	1.94432		5.64745	3.40826		3.68783	3.77402	5.37119
2.21049	4.29485	2.87513	6.53009				16.7776		3.14537	4.64337	4.4819	2.91031				6.93872	4.11048		7.90952	3.38881		6.65603	2.10437	12.4346
2.75748	8.91569	3.49011	2.98221				3.4821		5.92323	3.99728	6.06047	3.57159				5.29173	2.50112		3.86006	5.41932		2.69583	5.45498	6.23375
2.50252	2.71172	3.40324	5.62566				4.71938		2.18179	1.64464	2.63568	6.13984				3.0931	6.09167		1.45625	3.94096		3.889	5.93305	7.94449
2.27911	4.68085	3.80339	7.7087				3.50743		5.52825	2.27348	8.16301	3.25006				3.04934	3.03		2.22818	3.9261		4.1309	12.2763	3.36633
2.84811	1.80591	7.19286	2.46736				3.64543		6.99017	1.79885	5.47802	2.27718				3.67426	4.41397		9.38397	4.09184		3.58029	3.6838	1.38172
5.19731	2.34136	2.21593	8.52943				3.28899		3.77639	12.4614	2.9907	5.22098				4.47757	4.86313		2.51874	4.51724		3.99389	5.75232	7.60185
2.23615	3.11155	7.43495	5.02794				9.38241		13.9892	2.87512	4.58704	2.78967				2.62994	2.56988		2.56214	1.40227		16.6119	2.67774	9.30163
7.96132	2.84314	3.47567	4.39433				2.91536		3.23992	4.4587	4.49123	1.49074				11.0264	3.33465		8.96748	12.9167		5.4309	7.36917	2.54128
1.84307	2.78587	4.94757	11.2472				3.72107		15.8704	8.41342	3.87612	6.71964				5.50763	3.27795		1.23997	4.02791		3.98282	17.5155	4.42946
1.36884	2.71206	1.53353	9.21103				1.83451		2.57017	4.56869	7.10071	4.27675				7.38945	1.3619		1.42566	3.95744		8.94745	2.50431	2.43917
2.38256	2.58385	6.53773	5.06042				1.13862		22.3712	2.54905	3.08202	5.02384				3.90762	3.7261		3.85794	3.71323		6.59656	6.15534	7.29737
4.99186	9.39837	1.92546	3.01624				11.7245		7.24851	3.78547	8.96711	4.38922				7.94837	2.90831		4.81639	4.70743		2.07773	5.09943	6.71719
3.36839	3.44672	2.59109	3.28884				5.94525		3.10059	4.21773	3.0341	7.32116				2.18975	1.65148		4.90574	2.63282		2.4181	7.66587	3.89483
2.31779	2.25535	1.37925	3.622				3.11412		4.1402	7.41015	5.70662	6.38376				4.78718	3.00179		4.76007	9.0396		4.89865	3.93572	4.24289
2.94347	1.91649	3.919	4.35948				2.9428		5.57169	5.6262	4.84609	12.5804				7.16097	6.40064		2.96941	6.18069		4.72304	6.56646	6.43609
4.38738	11.1937	2.2719	3.48618				6.08548		7.14639	5.20059	4.34654	3.73715				2.81632	5.92295		2.78452	5.18817		16.5333	11.9192	6.04011
3.57568	3.90351	2.91264	6.68128				4.19862		3.5352	4.00673	3.52687	6.07772				2.84186	3.51109		9.00508	2.3956		1.71743	10.5752	11.4137
3.17151	3.76153	4.42802	22.7078				10.9602		6.7913	1.42506	2.5276	8.3383				15.461	4.75218		2.5375	2.91339		16.8532	5.288	10.5992
2.89517	2.94663	3.8925	8.29592				2.77219		6.74954	3.49694	3.89158	4.05507				4.01197	2.74643		1.96837	4.047		3.22306	10.4174	2.87903
3.46807	2.17838	2.46625	3.84862				3.09324		4.3799	4.32825	3.84885	3.38293				3.73274	5.11617		3.23417	3.19591		7.10164	5.14115	8.08233
2.53955	5.13782	2.70743	3.92491				1.73597		2.6777	9.23705	1.96043	4.16818				3.66313	3.5891		3.27389	3.45147		6.32975	4.18754	9.82217
12.1769	3.48499	2.30789	3.16747				1.36381		9.1592	3.96399	3.83039	3.3843				2.74778	3.58148		2.88728	4.28119		4.33885	3.57494	4.62077
2.94632	4.98125	3.00849	5.08848				2.16733		3.74756	4.53883	3.13008	6.42379				8.74937	5.02653		3.91977	4.00156		9.47208	3.74481	0.897331
5.83539	4.8016	3.33185	3.14707				14.2093		3.17874	3.26484	6.40287	4.32562				2.93921	1.70938		16.6401	1.78441		4.80983	11.5711	11.4965
4.65592	2.55656	2.69031	3.1129				8.6008		3.76382	4.32761	2.4221	6.52074				12.8241	5.36517		2.80005	4.56803		5.06689	4.38746	2.88699
2.61033	3.73022	4.20924	7.67376				8.85815		4.72791	2.77431	7.45471	3.78841				7.33295	9.87952		5.7343	3.14615		3.47425	3.69925	3.16247
3.55623	4.82089	1.98517	5.0059				4.59175		12.3993	6.88389	4.52304	3.71667				2.1339	3.35675		10.0265	7.14441		7.58217	3.63194	4.52697
2.23684	3.47747	5.457	7.60697				3.4548		4.39267	5.63518	3.66719	2.20222				7.56678	3.57772		6.64096	0.629135		3.62438	6.71954	1.22618
1.59707	2.62054	3.16793	2.19088				2.40639		3.87823	3.70015	6.47044	7.39522				3.6909	2.21429		4.06979	4.84957		12.7219	2.40206	23.8294
2.05852	9.80824	3.4511	3.29286				2.69435		4.60667	7.00784	9.2339	7.9271				3.36764	27.9868		3.60023	3.38575		2.62634	6.70532	5.11624
1.94486	3.648	5.12543	4.33094				2.63265		2.48771	3.87461	12.9556	8.47008				4.38561	2.97116		21.1871	2.23155		4.09964	8.7997	1.04147
1.95501	9.51945	3.70178	3.23422				9.60051		6.04158	3.66348	3.23569	22.1204				5.08521	3.3753		3.75157	4.99963		1.61377	9.62834	3.52296
2.28101	3.42629	3.36997	3.59452				6.05594		5.812	6.22664	4.87971	7.95214				5.5989	5.7301		4.98047	3.80126		2.81785	3.12322	7.04905
2.39147	7.97252	3.9954	5.08268				4.13385		9.13048	4.75805	4.02982	2.77445				4.80881	6.22119		2.90296	3.69974		4.13493	2.61345	7.39643
4.40117	6.44593	3.74513	4.71888				4.63502		1.44068	4.86194	7.45158	0.81875				2.40324	7.90542		3.11307	7.44216		2.7906	2.26322	11.4659
13.4356	17.9578	2.91895	4.59798				4.30632		2.7615	2.81793	3.4797	2.80971				3.11227	4.55794		3.60461	3.52647		4.83436	12.5673	7.2234
1.62473	3.58112	4.1001	13.4645				1.10109		7.21456	2.73868	3.17232	8.61078				4.39867	2.44553		4.4123	1.55515		13.3957	10.629	6.18356
2.46201	3.05118	3.1363	0.615881				5.88383		8.76891	11.7631	5.14593	5.73077				1.87929	4.36322		2.57523	5.11086		4.65042	5.18355	5.34352
8.11793	2.95105	3.74434	3.60893				1.5644		6.40259	4.79081	4.69236	1.88343				2.19164	7.32778		4.89246	2.0429		1.84077	4.56675	5.17729
5.58136	7.81721	3.4104	4.90398				16.4339		10.863	2.17952	5.61641	4.04722				6.71817	10.5187		2.5787	2.08759		2.83198	5.32591	8.58302
1.84349	5.25313	1.6	6.36787				2.46972		4.90968	8.04141	2.72911	2.82669				13.59	4.24118		2.29549	3.2321		2.93511	8.46136	8.04107
3.04121	2.92856	3.71599	9.84965				18.2755		8.87287	3.36986	1.87793	11.3461				8.43697	14.4501		3.60786	3.36197		7.85232	4.92952	2.46037
2.3927	9.69888	4.10751	15.0197				6.88788		3.96049	2.74023	2.94603	3.10766				6.5023	2.14698		3.44968	3.49753		3.67663	2.33277	2.08198
2.36864	2.62751	2.41553	12.8083				9.44875		14.1026	1.12027	10.8617	2.92875				7.4858	2.46235		2.83989	5.15098		5.69696	5.9819	12.393
2.31592	4.49204	4.78808	2.3568				4.914		4.18708	4.10375	3.07784	4.55961				2.64667	13.6276		3.99836	8.57954		10.7543	24.1883	9.08317
5.96374	2.58892	10.4936	5.14202				3.48481		14.841	7.05508	3.67288	5.83701				8.52265	7.85187		2.0837	2.67114		6.03041	2.93848	1.93019
2.56175	2.10196	3.36829	5.17661				2.33888		8.8925	5.51766	3.02588	7.85752				6.60409	2.73995		1.72255	4.42292		12.8779	5.75316	9.02623
1.19372	4.3428	3.34934	2.03712				1.76713		4.87562	2.64352	4.24234	11.074				20.6711	3.25583		4.23188	5.73627		5.38665	5.6373	19.0293
3.78103	1.93315	4.01154	2.69389				3.04655		2.3624	5.25361	6.34562	9.15304				2.35463	4.60232		3.11452	2.69469		5.52764	7.83419	2.24734
3.20681	2.45038	2.45004	3.52623				9.45634		3.13992	9.52248	3.10407	2.63514				9.45308	2.35682		2.0414	4.59033		5.81562	3.94589	6.22673
3.68178	2.06364	13.6263	3.14904				13.7029		1.94993	15.8923	2.74846	2.84097				3.64338	2.3569		2.38708	2.85856		5.3931	3.11972	2.57215
3.87594	3.19934	3.58914	7.05393				2.8808		3.36313	1.6992	5.64107	2.93291				2.88873	2.12299		5.97897	3.30477		1.59747	4.65589	3.50479
3.81711	24.0342	12.3731	7.4518				2.82646		3.07548	1.68216	1.86778	4.22052				3.52478	2.60874		6.21695	4.38161		9.3482	2.69139	9.38496
3.04637	2.24706	16.9096	4.1222				1.99415		4.85532	6.9726	3.0477	20.1227				19.1313	2.64319		2.92739	3.43807		4.41954	5.95126	2.91796
6.40914	19.7557	4.25144	7.31933				3.87799		2.06685	4.63061	5.00056	3.19637				3.11625	2.10364		1.18255	3.75137		4.43213	5.31872	5.12488
5.97339	2.41645	3.94631	13.943				15.7613		1.91593	3.70635	2.70509	7.07622				5.63741	1.48072		2.65347	5.55221		6.75532	4.38819	2.64607
2.09409	3.63276	5.98353	4.90912				2.0459		8.10808	2.2424	4.87942	11.3175				1.41806	3.94943		5.17652	4.10332		4.83296	10.33	16.4094
2.07637	12.6568	2.99842	13.4481				4.36811		3.36374	3.73822	4.24919	2.36634				2.42952	5.32148		3.3057	1.8659		3.88519	11.1125	6.05066
1.37962	4.23775	2.80134	3.61147				13.1294		3.64428	6.1425	5.24739	10.586				3.0906	7.36086		2.61043	2.01226		3.25717	11.7946	2.81265
1.80189	7.20865	4.79732	6.3819				3.32895		5.66694	7.69219	5.48648	7.98104				2.21861	9.02249		5.18504	6.36054		7.91311	6.28042	6.79613
3.02086	6.11416	5.20529	8.31983				2.51029		4.12953	5.51923	3.55862	3.22045				2.18711	2.67486		3.40133	2.9512		4.75043	7.00645	3.94403
4.00761	3.03214	3.53744	2.86484				5.87942		4.1723	5.32189	7.92763	3.30549				1.80303	3.01074		2.72141	2.00943		4.61821	6.43126	5.64511
3.64261	4.66213	3.99515	8.4716				3.44908		6.79543	2.64117	2.65924	10.1304				4.5797	3.27121		2.11684	2.36407		7.25044	2.33938	2.54772
8.33839	3.22283	2.10102	2.92722				2.07447		9.09357	6.10394	5.93034	19.751				5.77808	4.89189		3.13835	2.33923		4.80884	1.89032	5.92585
2.46911	3.03032	4.27434	3.02752				3.18656		4.7205	4.38915	2.63752	12.032				3.25784	7.49116		2.43912	1.95575		7.68091	2.45924	2.642
2.88377	4.3785	7.49904	2.1427				3.60327		11.2004	3.89362	5.03551	3.08701				2.1258	3.70907		7.76973	6.868		3.86021	1.937	3.0311
2.03149	3.52366	3.35294	9.44883				6.39984		5.14917	4.52161	12.1647	5.95262				15.2668	1.86307		10.4679	2.30559		3.47359	3.45526	2.08961
7.85197	3.27523	4.42312	4.42066				13.4415		3.59531	1.69596	7.00349	10.2545				5.64562	2.01285		13.979	3.36826		3.44725	4.75348	16.2745
4.36067	4.61574	3.34135	7.27646				2.21245		4.03207	6.28704	5.63411	8.06968				6.33293	11.4193		4.46412	3.0209		5.79966	8.25167	1.96989
0.858555	2.68662	5.04181	2.93389				2.83264		44.5353	5.29112	3.09938	3.68428				2.88988	2.76979		3.3568	4.02872		6.73091	5.07551	6.90327
2.2735	3.0191	2.37161	4.60694				4.75736		4.14413	4.29455	9.2619	2.12391				3.98939	4.20039		3.53403	3.36872		3.9496	2.93268	4.3082
5.17904	3.26753	2.56186	1.55594				4.59503		6.52523	16.219	2.75636	8.8947				3.71913	22.9156		4.19584	4.31991		5.08155	6.77761	5.82507
2.47116	4.26864	3.48931	3.86436				7.03768		4.47992	2.71598	5.69508	3.16028				6.92078	1.96759		2.74858	2.69525		4.28841	3.20819	7.70674
4.24205	10.6547	1.9858	9.36293				9.65338		3.62455	7.12491	3.17363	3.38956				3.19956	4.45443		1.54789	9.27659		9.66235	8.95198	3.62192
2.7881	1.39824	3.87106	4.55362				19.7708		4.16341	5.53089	7.26143	3.53793				7.78211	4.27227		2.83852	4.35071		4.45171	7.31819	5.39689
2.67998	9.39544	7.87162	5.23237				3.04247		2.14409	4.64621	9.08934	3.74322				1.93318	14.0164		4.80973	6.50034		4.02419	11.3026	7.2278
2.36364	2.19023	5.24729	11.0382				5.27747		17.2162	5.79375	5.07203	15.4211				19.4543	4.72684		2.52327	3.87707		3.05047	5.79213	5.79447
2.03401	4.04305	11.5953	7.48401				1.7655		2.67088	7.81299	6.57417	2.3731				12.0948	3.47162		1.92521	8.04733		12.6462	3.37951	1.83792
3.1723	3.69825	2.86475	9.17542				1.60335		17.9188	5.05479	4.42301	3.39617				6.00456	2.40912		2.50673	2.69398		4.51231	7.24598	2.2881
13.9533	3.75628	2.21489	4.08613				11.9212		4.24726	2.81812	2.19347	6.87085				1.91841	10.5539		3.37816	3.12596		1.62885	6.17944	2.98301
3.03203	4.91734	3.5372	5.14579				2.86076		11.3336	5.84951	2.51543	17.3603				1.451	4.86498		6.85463	2.3021		12.0496	4.72891	9.28322
14.3758	4.92454	2.11016	11.9278				6.03232		4.54409	3.80569	4.30433	18.2375				2.40661	6.83696		3.48047	2.9654		1.63906	5.43798	7.67799
2.70993	1.14103	2.74555	11.0393				1.0169		7.219	4.28758	5.47661	11.0693				1.56573	3.23281		2.34269	2.08819		3.82798	5.11729	4.86639
3.07829	3.65582	2.48523	3.74087				9.44258		4.19273	5.07513	6.45366	5.00038				6.49325	2.87359		3.42222	10.3519		3.27087	2.90661	10.1121
1.91611	6.75408	12.7373	4.13387				3.33283		2.27462	4.21367	9.42125	8.33542				2.74838	3.67626		4.00949	3.54953		3.4803	5.21237	1.47856
12.5181	6.18277	3.09263	4.65305				1.31979		3.45863	3.30653	6.29759	11.0021				3.98829	3.57275		4.13087	2.28818		10.7263	5.56077	3.97466
5.72934	2.27755	3.48277	3.81013				13.3479		3.78856	4.09396	1.76105	3.92725				5.4568	4.38772		3.91234	5.32776		2.11119	3.57488	2.44389
5.7837	4.51782	11.6461	16.2054				11.4872		3.36716	4.31125	3.57252	5.85488				3.33352	2.57493		3.11512	4.48361		3.0316	9.0112	2.4778
4.68642	5.35622	5.64918	3.26319				5.1173		3.07306	3.24083	2.56518	15.4784				3.63642	7.64889		5.72046	2.16578		13.1479	2.21882	9.58265
3.39124	5.86018	2.63297	12.4134				16.205		7.56146	2.84906	26.0243	5.31906				6.69604	3.99053		3.61486	3.3365		2.21178	12.7427	11.8171
4.84671	2.58078	1.83392	2.54371				2.53446		8.84774	7.04414	1.69619	6.69018				3.79622	4.32323		2.1374	3.4572		9.82171	8.28843	4.06461
6.30788	5.1342	4.03705	8.83363				3.91581		13.992	3.75228	2.82052	3.26912				10.5663	2.67921		4.07226	3.24184		2.08486	8.84382	9.88697
3.92914	4.34498	3.3368	9.234				14.867		3.89985	3.52472	3.21889	3.80755				3.90077	10.0273		4.23638	6.23328		4.60109	13.1006	2.0406
3.89408	5.50795	4.03684	3.41621				2.22677		5.58432	8.75127	2.10825	3.7554				1.95751	6.305		3.24394	2.2203		2.91198	14.3402	3.80136
2.28883	4.30183	6.39807	2.39585				8.22071		5.61336	5.06084	11.3049	6.84692				1.36694	2.90837		5.12447	2.58359		13.2213	3.65736	9.22121
3.61292	3.20939	3.22536	2.60448				3.01931		9.33795	3.55734	3.41433	3.90577				1.94081	6.12292		4.42378	3.19048		3.09388	3.00159	11.3456
16.0629	2.0474	6.5984	4.92959				6.6375		3.35474	2.24629	2.90259	3.34955				5.24437	2.76618		4.88495	1.87384		15.5959	7.14596	8.93247
1.3868	7.21933	2.46032	4.60135				3.35707		8.9566	3.73847	6.53179	7.05064				14.415	2.63891		2.24706	3.28558		3.34978	3.31067	14.1281
2.01422	11.7033	6.25506	8.64318				10.8349		3.52308	2.30067	9.10813	6.44281				6.03698	6.35174		2.32919	5.1209		7.163	3.48272	2.61132
10.37	3.30112	1.84807	6.1516				1.65221		3.97943	4.57554	3.33706	2.60121				4.16505	4.74926		4.29257	3.39305		4.98606	3.55592	5.71459
2.33787	2.63139	2.01882	9.72747				3.32632		5.52612	1.28708	4.84731	13.5421				2.42895	2.63383		2.36794	1.93756		2.8268	3.53031	4.87247
2.22309	8.97664	1.67395	2.95406				12.1467		9.87055	9.67138	2.28764	7.65896				2.99379	4.79598		3.15299	3.28488		5.34509	3.11754	1.76503
3.36601	2.17864	6.45164	3.35079				5.3842		7.75272	3.11486	4.20322	4.39327				9.36975	3.8164		2.55961	2.62552		5.00344	4.06826	11.9967
1.4427	3.09544	2.25238	5.4593				4.20268		2.08851	8.70638	5.02584	1.71648				4.78815	2.39271		3.61406	3.87417		6.14728	1.77089	3.61486
22.4293	9.95567	3.44686	4.01619				3.6301		2.48565	3.91527	2.90096	5.42625				3.91578	9.35205		1.19543	2.80024		6.61303	15.7907	15.9115
2.95191	13.0075	2.5865	2.11779				2.30193		4.28229	3.896	2.95782	2.78968				3.96539	8.98257		2.02989	4.52669		6.06934	3.40675	6.11833
2.08244	3.26458	4.19645	3.64044				3.27949		12.2843	3.62025	5.10799	7.2656				14.0806	5.43873		3.49795	4.48503		4.14573	1.8439	2.97814
3.24794	2.42321	5.03685	1.9413				3.74538		4.36358	2.95498	1.55255	16.1611				7.49545	3.78158		5.15397	2.49243		3.02612	12.3112	2.97678
2.80093	3.62207	16.2352	10.9376				2.99072		3.22324	3.9788	14.1566	9.47135				7.76187	2.63976		7.89381	3.61657		4.81878	4.9207	0.664924
2.84374	4.3492	7.71717	11.2096				3.15044		2.52572	4.05695	5.57582	4.98716				5.84133	6.6222		2.45412	3.29081		3.84693	6.78626	10.4096
2.81382	3.07718	4.00073	2.3732				12.4975		13.058	6.93545	7.06557	1.63265				4.75912	9.73695		4.6476	3.93412		4.24244	1.72887	15.4153
1.83649	4.80869	3.38314	3.0982				7.9816		3.27051	4.21777	3.57701	4.30808				4.39623	8.38571		3.498	1.9679		3.00876	2.06881	4.70687
3.29133	2.96518	2.32148	2.81821				7.51832		5.15779	2.57995	6.56538	9.75615				2.55949	8.13005		3.64705	2.12622		6.20844	13.1723	1.23139
3.09295	1.7513	3.84675	12.0321				2.37011		3.15529	5.16045	3.5522	7.16336				4.32964	3.3508		4.36503	2.4733		4.54459	3.55412	3.79899
1.91947	1.78714	3.41121	1.8609				1.62498		9.78233	2.54496	8.08365	4.24796				2.58344	3.87172		3.82405	3.55254		2.93637	3.75062	3.62722
2.83628	5.55506	10.2239	1.86971				15.2324		3.79999	2.49298	4.84723	3.56243				1.88675	2.52024		4.8984	8.99674		3.95809	4.23546	5.55059
5.65618	4.53781	4.6641	3.39261				3.46207		4.1011	4.86139	2.33063	4.39195				10.0294	12.4562		3.33415	7.39137		5.95425	7.10887	4.97149
2.40856	11.373	3.35517	3.13097				3.11287		3.68744	3.39528	4.13518	9.94458				3.34355	2.66395		4.55838	9.58266		2.34849	3.47666	7.26731
3.11826	4.86201	2.8384	11.3729				29.8913		1.30812	3.12546	13.8375	6.27509				7.56025	3.31733		4.56057	2.81049		3.21268	4.4182	6.43756
4.13884	2.8908	3.69223	6.03988				8.29282		7.1496	6.16268	3.71977	5.84477				6.2979	3.94603		12.4525	5.82877		6.7932	2.99101	4.67213
3.66193	3.18779	7.83998	4.65741				2.92072		14.1182	3.75583	3.37224	3.80108				4.93721	4.75748		5.69135	3.70554		3.46495	8.14748	4.02903
3.0432	3.90511	2.24059	2.40595				18.4206		7.69488	8.19956	4.48053	4.19212				11.2904	3.99007		2.18309	2.87504		2.06668	8.63566	5.18302
5.81911	10.9789	1.94954	5.84484				5.57704		3.96542	1.63657	2.22883	2.66648				2.77401	2.85561		3.75343	1.98684		2.31546	4.37506	5.42264
1.96134	4.06888	3.87987	4.16671				5.26725		4.08337	1.87487	6.9046	9.0073				3.37023	3.20179		5.1062	5.19611		5.73261	12.8202	14.4227
2.33154	3.19973	3.70126	3.02388				3.81781		7.39306	4.39404	3.36066	8.73399				4.38582	4.7373		2.55077	5.52087		2.00579	4.63602	6.31776
3.72161	5.11455	2.03229	6.42794				1.96142		5.10527	14.7546	3.14338	5.38475				19.3805	3.20785		2.9695	2.33131		4.79111	4.73214	4.10881
5.27043	2.82811	4.24026	6.2952				4.32416		4.69167	15.7078	4.11689	5.54362				5.86149	4.02717		2.92749	3.86402		17.9514	3.99009	1.76506
2.36532	4.59612	5.79855	2.77901				1.94836		9.52366	1.18237	8.33725	1.2943				3.93778	6.98287		10.4797	5.17523		8.1123	3.936	1.65613
3.6472	10.0498	2.50393	3.41524				6.08789		7.51902	4.55936	3.4647	4.31277				3.0678	1.68158		5.60936	3.0496		4.83686	5.70393	5.86669
4.4348	3.79484	5.60449	10.2887				2.16321		7.12175	10.1862	2.87961	4.48245				3.14084	2.2295		2.44688	3.44984		4.27742	12.4108	4.79999
6.84176	6.62827	4.34786	10.0898				8.44095		3.16873	1.38221	3.3088	7.00242				3.23238	3.63481		2.75198	2.95757		10.0107	2.60371	18.4244
2.6981	3.35759	1.29671	2.53471				2.69623		7.11356	3.78079	11.2866	2.95807				4.28603	11.3208		1.89247	10.797		4.99639	2.505	10.2417
7.2018	4.11158	3.68658	3.9488				4.81075		5.30795	6.02959	2.96096	9.82218				12.5031	6.44953		2.90742	3.47709		5.44507	19.3685	6.57721
1.90717	3.17904	4.15839	3.95816				9.39337		10.026	4.89268	10.9714	15.1162				1.73396	1.87039		1.82564	4.57477		3.18043	2.58441	5.41128
2.51019	6.30717	2.86468	8.11993				3.82209		12.2262	5.82923	4.67771	6.5038				7.61018	5.60723		1.93896	8.24678		7.53194	3.27206	6.87382
1.72393	10.807	5.48842	3.9823				17.0562		3.12059	4.61486	2.59529	6.24173				14.9339	3.11646		3.5858	3.07261		4.71385	1.72328	8.89294
27.5396	3.1226	20.4888	6.351				4.38059		5.44016	4.17998	4.19256	3.59621				2.41314	0.183004		2.51166	3.57054		3.15514	9.69684	3.98943
3.80665	4.2893	2.51048	2.7856				2.70199		6.86748	5.32102	3.72213	7.62613				6.82716	3.21874		5.50598	2.51931		5.44913	3.02565	3.9813
2.86879	5.78356	3.60744	3.10848				3.10842		2.01949	10.7945	4.71317	8.35919				2.34971	4.26486		4.2022	5.43898		2.96757	7.13769	7.77771
4.05578	2.85112	3.35446	2.27395				5.59072		5.16524	4.1338	4.23118	9.86995				4.07325	2.42735		2.99162	3.0738		4.43455	4.8599	2.54105
2.57095	2.88289	6.04359	3.66363				4.16541		6.40984	5.63301	3.17142	14.1398				3.27464			5.75072	2.01378		3.74682	4.06257	2.40539
3.77173	2.77191	4.27348	2.8563				3.80663		4.24087	9.23236	14.0189	7.9638				7.84133			4.87011	3.63961		4.48707	3.8762	4.75186
8.53064	3.36597	3.64289	20.247				4.16351		3.63012	5.09022	4.33745	7.7019				5.21356			2.24665	2.96744		2.46431	3.84595	4.00642
2.95562	3.67897	5.39118	7.18046				4.02194		7.95112	2.89737	10.5982	7.28634				8.57649			8.67184	1.34405		5.53427	5.43297	8.41363
2.53428	2.43281	5.68025	2.35376				2.38204		10.0957	4.09585	9.74828	6.93586				5.4941			3.30108	7.45476		4.89227	6.42032	2.23726
2.65706	2.77612	4.92173	7.14083				3.72945		3.34828	5.08949	3.92789	2.73641				10.1254			3.29435	30.4282		9.1685	2.67887	8.18326
3.28413	2.29001	2.75753	2.19591				4.33821		4.68382	2.09784	7.47673	11.3904				7.52529			3.59953	4.29585		6.65135	6.79177	3.53821
3.0184	2.63187	4.42311	2.69826				1.92054		3.77426	12.6427	9.12431	9.28559				1.35474			3.61989	4.19607		4.92891	2.21939	11.597
3.33171	3.33112	3.82636	1.14224				2.67092		4.46353	2.84678	5.97249	10.0272				0.895085			4.61177	1.60024		7.98663	2.81484	5.62377
2.61743	2.71453	3.7899	4.34534				3.51845		6.52213	2.59703	4.81563	2.53826				4.39669			5.35279	6.42409		8.80517	4.2384	15.6888
3.48121	7.76439	3.84595	1.78568				3.95679		15.5733	1.74942	1.86216	5.83073				4.2483			2.48033	2.98474		3.57169	12.4078	3.11474
4.46635	2.4736	5.55676	7.30678				3.08151		5.22494	2.58109	3.29147	17.6781				16.7044			2.89884	4.7374		2.38699	3.96793	8.53881
1.84851	5.78651	1.89858	11.9724				3.40403		2.75158	3.14362	2.91692	3.52739				2.23833			2.93695	5.84259		13.2112	6.97774	6.72356
14.3852	2.07838	4.95704	2.81893				8.07158		2.78509	6.04454	2.70098	4.41117				1.63387			6.76253	15.3806		9.89199	4.99551	9.28549
2.88288	3.92882	3.99225	2.29504				18.5588		1.47967	5.42063	1.96715	4.60786				10.9867			2.75507	5.03944		7.38693	3.73916	5.20158
3.72918	2.6197	1.55284	4.54362				9.39467		10.3424	2.94952	2.8487	3.05387				1.94624			11.0307	3.30891		9.6639	5.37203	2.8882
3.52843	2.15458	2.74617	5.8749				3.44855		11.1183	2.49445	2.86116	10.9272				2.73042			2.68084	8.51339		8.33486	7.75887	2.61805
6.49765	3.30049	6.76938	19.4762				3.05553		8.27337	2.55299	5.66569	10.3126				2.1378			1.99483	1.70004		2.555	4.06721	13.8065
3.98817	4.09498	6.22618	3.24191				10.1162		7.75845	8.16994	4.59942	4.82403				3.66837			28.5057	3.95426		3.48242	3.86213	12.6545
3.35742	3.02885	4.01573	6.19214				2.6908		10.026	5.3984	3.40992	8.2769				5.10903			1.97625	11.05		1.2055	3.56976	4.52499
4.41589	2.10783	5.74159	3.95981				8.64478		3.8421	3.38815	2.1852	8.40121				11.4253			9.43889	3.70345		1.63817	3.90648	8.18106
3.28269	3.07671	2.05217	2.56019				2.68043		8.38744	4.03294	2.60527	4.05918				9.2581			2.32089	7.23055		11.8172	3.64527	11.2849
3.90266	5.04389	5.0724	0.812282				1.8442		2.79145	4.95235	5.76913	11.3689				3.35558			7.92143	6.8373		2.74799	3.67665	10.8975
3.26452	11.5713	7.19897	4.70634				8.32414		10.6943	3.23245	7.06337	13.0636				2.63854			2.37448	4.62844		1.78204	4.13429	5.08087
2.14503	7.01325	7.41365	13.8878				3.62248		10.6609	4.33958	3.26536	12.3407				2.95121			2.9564	0.777935		3.63658	9.48865	2.36884
1.4363	5.11049	2.49559	18.1695				2.20259		8.51089	8.15418	1.9755	6.55505				2.55025			3.55742	4.36925		3.21136	4.10636	5.48138
7.51924	2.16014	5.4622	4.62824				8.65957		2.15647	4.47904	7.7909	8.23276				5.56474			2.78559	0.833521		2.78665	8.91787	3.64059
5.26013	9.28878	4.3772	8.27977				2.42217		5.94317	3.38683	2.97523	6.56756				3.1372			2.88269	3.218		5.8999	6.78644	9.05661
2.65764	5.01254	3.23308	3.25181				7.00678		3.17378	3.02829	20.0867	2.97226				2.66819			4.96962	3.7557		5.00073	5.50034	10.6022
1.77631	3.61327	4.17137	4.02665				2.27051		4.9291	5.41707	1.05264	17.7547				3.1415			3.44857	2.04551		3.30957	3.33679	2.84438
4.04732	4.50124	5.1752	4.23154				3.04122		6.32832	4.88718	1.71326	10.9641				1.63514			3.06816	3.17078		4.81223	8.03819	3.08128
5.73835	3.09013	6.31269	4.95634				2.75492		8.4178	12.2586	3.46367	4.83453				3.47059			3.32164	2.1775		2.04118	18.1683	7.00237
2.9527	12.9424	2.221	14.9049				1.48609		4.17146	9.02583	5.14342	6.96447				3.71513			4.20274	8.82982		5.23372	3.47915	9.0215
2.5581	10.9612	4.87105	11.7547				1.75992		2.87114	10.2736	3.94223	2.83247				2.0186			3.22375	2.92669		3.08244	4.05389	2.88518
2.76337	2.58851	3.1383	2.48792				7.65491		7.57224	3.23528	1.62107	5.80031				4.49331			3.2821	4.51048		4.36645	1.98425	5.66317
3.88776	4.08112	3.00821	3.71481				4.24626		1.92419	4.1989	1.8574	2.59497				14.6763			2.90054	1.05921		7.20142	2.09374	3.58051
4.17233	7.58979	5.84041	2.18541				8.87092		9.3235	4.01711	3.38454	8.14976				3.89232			2.2501	1.3324		12.3151	3.03712	13.3132
2.64884	2.4058	2.46278	6.16238				6.57022		4.78977	6.17853	3.29937	14.4413				2.95724			7.52298	2.51255		2.6141	2.88301	3.26038
4.5986	3.56732	5.49145	4.26471				18.6165		4.45027	3.1962	1.377	2.88358				1.67532			2.07907	0.738146		1.95546	2.37972	10.1744
2.23626	27.429	1.71472	2.66121				14.1867		18.0057	3.2469	18.0299	2.28898				1.47565			2.69394	3.84801		2.54311	3.61321	4.27786
4.55386	2.36544	1.19407	7.99864				1.52499		1.84848	2.9087	3.14937	14.9087				13.5818			2.0779	3.53287		7.47648	3.35697	4.89275
4.4183	4.83742	4.18476	3.4827				3.80503		17.971	3.13909	2.39114	11.5281				2.01826			4.19129	2.70016		3.20597	3.80004	5.60764
3.01909	6.13937	5.89475	11.3254				1.17669		3.12903	2.97303	4.64021	3.64205				11.3427			3.76096	10.9504		3.73362	6.55187	4.23996
1.47583	2.95618	6.84728	5.68594				3.49286		6.06795	3.20412	17.9294	3.6416				3.21903			2.51831	9.14232		4.91234	3.94192	9.4344
1.36767	6.84429	2.41	7.51957				3.93611		1.9607	4.77366	3.83911	6.45048				1.03105			4.2174	7.46852		2.73069	5.23985	7.79815
14.9604	3.82759	0.678859	6.47573				2.94732		7.59128	5.55903	2.3731	7.81055				2.3611			5.80515	2.37499		7.99786	2.87159	3.06469
17.5933	2.30054	1.28558	3.51346				3.82235		7.68954	2.48676	6.02283	10.7882				6.90979			3.48102	2.27835		2.6461	5.97882	1.48747
4.7564	1.50358	3.09824	5.52468				2.2216		3.51726	2.83729	0.791224	3.40776				5.68443			4.8293	9.0951		19.1726	2.92665	2.19894
5.85223	3.05243	6.61636	5.71504				13.5854		2.50195	2.6388	17.0596	3.4248				2.72047			4.39592	4.85476		1.89563	2.77951	9.07464
13.1494	2.83721	3.43619	8.76446				2.96827		3.17877	2.92499	11.4205	2.85388				2.63179			3.74814	2.75892		1.45721	19.6747	2.8023
12.4521	2.76308	4.11747	11.6895				6.74675		12.7109	3.43331	3.37264	4.5315				4.6828			2.31371	1.97064		1.91037	12.5451	2.12206
4.02106	5.59088	5.63829	3.29311				4.82059		4.13043	3.3421	10.8418	6.42985				5.92045			2.0027	2.08371		3.16866	4.63674	5.92047
21.9919	4.28213	4.79223	2.9379				3.02792		2.45435	2.52319	8.37694	9.15214				6.9258			5.64117	1.68483		5.07521	2.54441	13.2856
25.0402	6.49212	2.96786	25.047				10.1737		8.78313	2.35404	1.39362	2.87186				1.19339			1.80376	7.47119		1.70727	6.72286	3.23447
4.15862	2.95629	4.50969	4.98689				2.67943		27.3186	2.09529	5.81645	6.57638				4.27427			3.9024	4.54881		3.45609	9.40472	4.02474
7.64315	11.388	5.85453	14.4179				4.38196		3.90069	2.59224	6.25265	8.08712				10.3357			3.10303	2.46983		1.33485	5.52002	2.89732
2.2672	4.37683	3.28222	2.46328				7.3616		8.82581	2.10215	5.12446	3.79562				2.21048			3.54655	3.21795		9.33595	3.49437	4.33346
2.01043	6.07894	3.4911	3.8119				16.6863		2.4758	2.63427	3.64017	1.92272				5.12329			2.99676	5.52969		3.29711	8.4515	10.8688
1.38588	3.602	0.983392	1.4889				2.80604		3.34594	2.99262	8.16397	14.8315				4.84482			1.41338	2.65366		5.48041	3.75206	9.54263
2.16471	5.39217	5.93591	1.6252				10.333		8.22451	3.09389	1.11462	3.73645				4.43474			0.867484	4.3378		4.15644	2.56756	2.96769
2.7896	3.22874	3.62898	5.47911				3.99891		3.55498	2.05518	3.97164	12.611				2.65162			1.96761	2.87684		6.38126	1.27656	11.3956
2.64365	2.77959	2.67209	3.40273				2.71674		2.63972	4.16513	0.817663	11.9152				4.69513			2.6352	4.80311		9.44155	6.27088	2.10308
10.3593	2.64414	4.29799	3.15555				11.7152		8.89934	2.31549	10.261	5.97757				5.19158			1.88152	4.24719		3.64043	3.10507	1.05932
2.02289	2.71197	1.61395	9.59899				2.68623		3.13237	3.75202	2.12942	5.68245				2.32876			4.77462	3.58254		9.47855	8.18833	3.86185
6.37512	1.99126	3.17795	1.17592				2.19908		10.2876	4.80991	6.991	8.95638				1.695			5.63084	1.97117		3.02375	1.97605	4.0872
3.26442	6.10159	2.34403	13.62				6.71319		7.4236	4.79575	6.19196	3.48839				6.76908			4.04709	6.47679		4.21752	4.39895	8.57565
4.15408	4.00005	3.39447	11.6689				3.60442		7.10195	3.40786	2.52435	2.00534				4.7812			3.80973	3.59712		3.58189	11.7828	4.24123
2.67094	7.4512	8.27046	2.90708				14.3782		28.6028	3.29215	3.8812	6.5931				2.37511			5.65768	2.28352		6.83592	3.60624	3.24738
11.0228	6.92623	2.15149	4.23022				6.19681		13.5868	2.88259	3.75554	6.45312				2.01737			3.01062	4.72595		4.90895	9.91482	2.07325
2.07947	4.39777	1.94007	6.81743				4.86582		5.1448	2.86237	5.45056	1.71489				3.83646			3.47174	3.03348		2.61306	6.34425	7.43345
3.09072	5.09997	2.59296	4.99306				1.35067		3.94481	3.73951	3.73	4.14549				4.89204			6.43407	3.04341		3.08366	4.57266	2.80799
6.44057	10.6851	2.13536	3.4247				2.60527		3.67992	7.82426	3.02296	14.2351				11.3054			2.60789	2.27471		4.26589	24.6326	8.06745
2.32919	2.19206	14.9374	11.5394				2.10966		6.24945	3.92794	4.27286	2.77812				3.36632			5.15638	2.48221		4.81579	6.32097	9.03068
3.92378	10.5164	4.37297	4.09161				6.64093		5.46507	2.21896	2.62779	1.43039				3.48856			3.01183	6.10262		4.59593	13.5743	16.5205
3.38126	1.17529	5.69959	5.70125				11.6383		11.8112	3.68928	14.3474	5.03793				6.87332			3.08526	3.99903		1.96332	2.24684	4.98246
4.30292	15.1867	2.47707	1.93474				8.9757		5.39516	2.87502	21.4189	10.5778				1.82284			7.20608	2.30532		9.21914	9.98014	4.81349
5.88759	5.01243	3.89565	1.8835				3.04614		2.54968	4.86539	3.23907	3.4773				5.33076			14.161	9.42454		5.17559	3.64039	5.75779
6.38295	1.28029	3.72786	14.2138				1.68037		5.66432	2.55395		18.6998				8.59899			10.2879	2.80419		4.30819	5.63511	6.01349
2.38278	1.61831	3.30028	1.90588				3.39997		5.01034	2.72791		2.03835				4.25182			2.08894	4.85028		2.22698	2.77612	6.06131
6.85823	1.9889	3.68018	3.22569				3.97702		4.69088	6.51675		11.0673				4.23297			2.27133	8.84316		4.65625	4.74054	4.88233
3.73434	2.52387	4.97265	6.55771				2.23598		10.0884	2.80316		5.83712				13.5961			1.62231	1.51282		8.57416	8.09763	4.92957
2.09123	3.94134	3.63678	7.87841				3.06975		5.17929	3.42973		7.12835				3.06238			2.69445	4.81429		1.96411	3.71039	5.70592
1.67503	3.69902	2.22195	7.72088				9.71674		5.25305	4.01645		4.72933				4.12457			3.2506	13.9978		6.89457	2.77144	5.61447
3.15524	3.35542	3.15244	2.38801				2.09575		7.24878	3.07422		6.5348				4.18389			3.11107	1.39163		3.01563	4.5324	8.26195
7.10497	8.19947	7.6578	1.37722				4.51976		5.72541	6.67698		4.91975				4.37305			4.33992	21.286		13.9995	3.34551	2.70396
17.335	3.14643	3.08528	2.80938				3.22373		2.61451	5.79679		4.636				2.93238			3.96223	5.88811		4.57299	20.3242	4.86541
2.71379	3.58779	3.18484	1.73013				2.50983		4.77269	3.09982		10.5543				6.12615			3.93458	7.58435		2.81	2.7684	12.6454
12.6836	4.78614	11.7181	7.39777				3.3987		2.70457	4.54468		2.71513				2.21103			4.03302	4.22917		3.84774	8.44619	4.5829
3.32066	4.00515	5.15267	20.3147				4.35368		1.61992	5.88797		9.5261				4.02773			3.72665	2.82406		2.18131	5.02794	9.3697
4.1691	5.16385	2.3749	2.65572				3.37353		8.41353	3.16174		3.87355				3.68591			4.41404	8.49951		20.0245	5.85083	3.86297
8.59735	3.29772	2.54974	6.41614				3.91188		2.39983	5.75944		5.84032				3.43816			2.09328	2.30396		4.44614	13.2084	7.99006
3.71108	2.80236	2.15833	1.9179				3.51934		9.16258	6.66082		2.65524				1.46406			3.34295	1.98419		0.664786	10.5917	10.1268
4.07915	3.22859	3.12164					2.0214		3.63715	2.06168		4.41921				1.25287			3.7237	6.4333		3.43466	17.508	2.00084
3.33421	3.74664	1.62288					3.42112		2.22438	9.99277		4.89651				9.25157			2.79913	2.31942		2.38365	3.09237	10.0449
0.8855	5.67652	2.14881					7.37804		2.35399	3.53517		2.54052				2.73374			3.00275	3.50992		10.1433	10.7572	11.6692
2.25378	4.80513	1.26227					2.5252		2.17622	6.63674		6.29796				3.01336			6.91664	5.87699		8.17308	6.65111	3.74612
9.8524	2.32714	6.74318					7.83921		2.14992	11.9379		4.96545				3.67893			3.64194	3.4865		3.02106	14.2137	8.10415
2.02556	1.21944	4.4121					3.09333		5.35148	10.5876		3.2851				2.83981			3.45395	2.3195		4.60654	3.34529	7.70722
2.0391	10.1608	13.5498					1.79205		1.98374	2.91323		7.91023				4.16883			3.08019	2.60764		3.00218	4.39066	5.8184
2.85375	2.07687	3.04861					5.04773		13.4812	3.707		5.99135				1.39592			3.72055	3.24931		2.57157	9.46964	4.55248
2.00223	4.55793	1.70992					16.8633		4.80643	6.11497		1.09064				1.51921			4.00095	2.33057		4.27902	3.16653	5.13276
2.24118	2.9941	5.12248					10.503		3.00716	4.13162		7.0199				7.76685			2.05018	6.20383		4.19962	3.33495	10.2599
4.31033	6.02611	3.66807					3.04192		3.85337	2.61437		10.9806				9.19673			1.87798	3.78345		2.60634	4.69154	16.243
2.20675	4.049	3.00069					1.93161		8.28209	5.68288		2.39589				14.5858			3.69991	6.51968		4.2546	3.75285	13.3048
1.61546	5.46566	2.37178					1.39696		3.07104	3.87775		4.31089				6.74425			3.94606	2.62402		3.97818	5.23389	9.22929
2.25629	9.46762	2.76867					12.0558		3.2726	2.53778		4.05606				15.474			3.5113	0.886323		3.92288	2.9464	4.30262
1.41146	4.28401	4.47377					8.07247		6.83595	5.54782		4.52				3.43998			1.74351	1.41106		4.60726	9.05523	24.2496
2.37772	2.36136	4.21615					5.22132		1.76309	2.58221		10.3572				5.61711			10.9094	4.51754		13.6226	7.83897	4.92671
3.31435	6.67789	9.284					2.23332		12.8546	2.92397		1.95331				2.65854			9.99006	3.48831		7.46992	8.98413	11.4886
3.81231	3.3835	2.77564					1.8966		3.36507	11.3437		6.7711				4.03039			4.39019	2.33293		8.92616	11.2288	13.4098
4.0229	13.8254	3.31437					2.01702		4.30062	1.64022		3.8279				15.5075			6.30781	4.49968		10.9774	4.80452	2.84807
2.79141	2.90416	3.54431					6.34615		11.1004	2.48002		4.31199				7.40142			7.90028	4.51367		4.51407	2.82994	4.13866
5.72736	2.04829	2.42963					4.24938		2.44063	2.05191		10.2123				9.35223			3.99488	7.24481		3.50262	3.39751	15.075
3.04947	4.2183	3.41404					2.84986		2.09995	2.57756		2.35475				2.76411			1.85127	2.47202		5.3793	10.1671	11.1625
1.7526	1.64425	3.15217					4.17395		3.93448	2.98725		5.46155				1.40716			2.72777	2.63795		12.3122	3.73346	1.06783
5.01335	4.5927	2.07901					6.75294		3.3548	4.09988		3.86336				3.71628			14.076	6.4071		5.34109	2.75724	14.5034
15.7009	7.08962	3.09513					6.73684		5.70581	3.68013		2.07016				2.50501			3.43096	2.83741		13.3309	11.9541	5.14128
5.88538	11.8846	2.96216					7.40127		2.06357	5.54923		3.16973				7.71358			2.86529	3.4266		3.45448	10.5298	14.7449
2.6303	4.28535	4.77752					1.65272		6.42633	2.98021		4.05776				2.93072			3.62446	3.59446		4.3032	3.78445	1.96714
13.5157	11.7251	5.97198					1.17437		3.64895	4.18021		3.89838				27.5794			2.41017	3.34026		3.81627	2.99378	8.49594
3.73729	3.16471	4.13717					3.37616		1.46892	3.26434		6.59427				4.91227			5.6028	4.10677		4.3082	2.62824	14.3711
12.1952	10.8925	15.4069					3.72036		9.03514	3.13625		5.4059				18.8352			3.95048	2.32765		6.87046	3.19417	4.30443
7.1451	4.30646	2.47816					6.63049		5.49058	3.01558		9.15143				3.978			3.02253	1.14251		2.95254	3.15743	3.64581
3.56971	4.65416	3.01368					4.88146		2.87789	3.08505		5.81889				2.71868			3.13885	9.65192		2.68371	3.81571	3.88802
7.55074	3.42213	3.84271					5.50351		3.22481	3.63298		5.22189				3.48303			6.42845	2.3532		3.98142	3.03693	3.55642
3.68887	5.72472	3.43409					2.78759		31.8477	4.4335		12.1982				10.1196			2.30421	11.2755		4.82994	14.1222	3.10918
1.32021	4.48434	1.11783					6.36109		2.82828	1.71931		3.63913				5.95796			3.22071	4.99227		4.33856	8.08629	2.60019
1.28626	2.52389	4.2582					4.11677		7.81395	7.88363		17.2179				9.83568			3.50203	6.30392		3.79279	6.7825	1.79963
7.62193	4.95908	7.26584					8.29667		5.17446	8.43104		14.5806				3.50836			4.90169	2.8937		1.96115	3.38846	9.35925
2.94734	4.12005	11.268					1.23077		1.23298	2.2252		1.29798				4.33284			2.50893	3.02025		2.48501	2.91334	3.39068
2.35488	4.71165	1.26472					9.73054		2.76137	3.59585		3.15663				2.71357			4.38029	3.20546		2.14411	11.7432	2.98092
3.89652	1.86062	3.42628					6.05428		6.05389	1.63407		8.07477				6.24165			10.5195	2.63625		4.78626	6.14135	8.88247
3.13034	3.1486	5.09967					3.33046		2.4945	8.08689		3.55349				4.89771			3.06887	4.00056		2.98532	7.80833	6.80974
3.29254	6.1876	4.60167					2.28727		6.30616	1.40168		4.45469				3.25038			2.4817	3.05776		8.61498	3.54214	22.8462
8.48458	0.951919	4.3217					12.7002		3.96793	4.20859		4.24757				10.2888			9.73595	2.64188		2.49766	4.15948	7.50705
11.065	5.04366	4.86616					2.42039		5.22586	3.1866		4.81689				3.54911			4.49336	2.46123		6.85433	5.45339	7.10364
3.41057	8.08314	2.3359					8.81165		9.048	3.62599		2.87893				6.73248			7.70211	2.59688		2.75206	2.87689	2.24732
2.53659	3.50712	2.66521					8.63649		5.78243	6.01147		3.65369				10.4834			6.4528	3.39135		1.92989	4.29088	10.7199
2.28135	7.72595	2.43204					3.07175		6.23574	3.18354		7.16378				4.21362			1.16406	5.23296		2.55363	3.29576	9.7701
6.60817	1.04253	2.65471					2.33889		1.54166	5.77311		2.04777				8.8199			4.90951	1.99516		0.975045	11.2547	17.8377
5.56858	8.65148	3.61328					7.15583		1.81666	3.53695		2.15659				1.04259			3.96214	3.1695		19.611	8.62768	5.53389
5.07865	4.42216	5.68265					2.51813		18.737	2.87098		7.53331				8.45165			3.7641	3.76569		7.50154	4.60015	15.7274
21.7435	3.52226	3.248					3.60068		8.36251	5.47185		7.24233				3.52167			4.94517	5.51348		2.2659	4.82755	5.19219
16.1183	2.09352	4.82859					4.55156		10.7414	7.96672		2.34836				4.4318			4.03313	9.24513		1.41722	3.87037	12.8553
5.44568	4.87057	2.63919					4.9962		4.94428	4.31909		5.90789				8.80908			3.90062	1.91116		4.09343	3.91551	3.67309
2.52486	7.51901	3.24415					5.92324		2.20746	3.30223		9.04187				2.20658			3.62214	9.08094		2.59033	4.78205	3.89021
4.49611	3.67084	4.07023					16.8933		3.97182	4.94993		3.34688				3.23613			7.80156	3.14691		4.40665	4.4256	4.09178
4.56645	4.58758	14.7332					4.26391		5.21999	3.61822		12.8073				3.31477			4.65484	14.3814		3.92668	6.70414	10.4278
3.77999	2.17742	4.00838					10.8794		18.0084	10.4725		1.97508				2.87962			3.49833	20.9519		3.93819	5.02744	3.17748
3.01811	2.53458	2.99978					14.9797		4.15245	2.98639		15.3444				4.50195			2.36304	6.60626		3.16409	8.5068	11.6281
4.0902	2.80382	5.16718					8.77663		3.15898	5.27756		4.03655				4.35189			3.81272	3.9003		3.4986	6.51604	2.57554
3.41321	3.54972	2.44219					2.80612			8.94633		2.21497				4.79273			4.19065	3.56066		5.09831	5.71023	2.94828
2.56808	2.15491	4.88093					1.85522			10.4125		4.23816				21.1758			7.55598	2.46055		8.94205	5.26234	1.85789
4.60338	4.03492	2.69118					1.37705			3.63813		7.13077				2.32633			5.52527	3.26457		3.54727	3.83911	3.08558
2.37815	2.81376	2.4402					14.3122			19.238		1.9757				4.41271			14.6221	3.97273		11.5832	5.50388	6.02601
2.96904	2.42052	6.11583					3.6842			2.46682		4.9922				3.49161			11.4429	2.6763		3.12715	2.5756	8.35952
9.39853	2.63514	3.69007					2.21923			3.47121		3.91681				1.80822			5.58228	2.19736		5.37621	5.0372	8.49061
1.76333	4.44023	3.85605					1.74111			5.22904		8.75162				7.78408			1.61839	3.11029		1.80421	11.764	2.31892
2.51376	3.08775	2.17921					19.2226			3.18815		4.76474				4.73257			3.93711	2.25643		4.40167	9.42057	3.60169
2.80564	2.97364	3.07798					3.91176			3.79334		8.24833				1.3541			5.83729	2.6668		3.54459	1.18693	3.11012
2.14099	4.50418	2.62315					2.62793			2.84697		13.0929				2.35815			1.65512	2.38263		3.95189	8.03026	3.99876
4.33283	5.76675	5.40971					8.03256			3.48016		9.80858				3.30337			2.23449	5.60684		2.83446	3.13211	2.57149
6.18394	3.78927	8.946					3.8771			4.3204		4.02703				6.20415			2.64769	3.84651		4.64041	5.02323	3.97767
4.10032	2.58973	12.7112					3.36783			4.0992		3.2333				2.90202			4.92758	3.68669		3.86326	2.84523	17.7276
3.71279	7.42097	2.61402					9.02081			4.78246		11.9611				4.44035			9.17076	1.43071		3.41871	3.46522	3.56528
6.30264	5.3922	2.56603					9.06719			1.84195		3.82606				2.84647			3.8194	4.21679		4.60141	4.53917	3.87806
12.1851	5.93362	3.83221					2.88039			5.67622		5.26278				4.64836			2.46652	4.25674		10.1439	3.15339	14.6818
3.3164	2.5054	2.94025					10.3059			2.37068		6.18302				4.53873			2.19292	5.02066		2.63	3.31754	2.85133
6.85203	5.57905	6.81641					7.77592			2.85107		15.3309				9.09445			2.59428	5.95098		3.26817	5.06724	5.78778
3.86942	6.04372	4.36791					2.52422			4.88435		3.52737				11.402			2.60679	3.50083		4.57702	3.07312	3.33823
2.01689	2.68629	2.99009					19.4471			4.25836		10.1342				4.05377			2.91065	3.36599		12.9924	12.463	29.5054
2.97098	3.41346	4.89402					0.316775			11.5024		4.0263				7.15586			3.27552	2.09961		6.54668	9.22022	13.465
3.2665	4.46982	3.78431					4.299			3.79515		13.3192				2.24091			6.52379	3.48901		3.66794	3.63002	5.83505
7.9111	2.44457	3.74612					3.33212			1.23634		23.8941				3.00835			5.74713	3.13453		2.6707	3.23103	3.77009
4.67572	2.5863	2.84589					5.50979			1.65957		2.39796				4.49395			2.6199	5.64886		1.50934	10.7844	5.85804
2.69779	1.34276	5.13271					4.82344			2.29086		3.84005				6.01378			3.42565	4.75138		11.4115	3.12077	9.48736
2.36025	17.0306	3.72602					1.86869			4.99191		2.12255				3.0767			2.59496	1.80686		1.85411	3.37738	3.97502
3.20183	1.63067	4.99589					2.8669			8.26535		8.96841				5.67225			2.71938	4.02731		7.70164	2.33325	1.94457
3.59967	3.89197	6.56832					1.59578			3.74649		8.0242				3.94437			2.94508	1.97102		4.10027	3.54768	7.91285
4.21434	6.63727	3.94669					2.12342			4.12617		4.31051				3.43017			2.2753	9.38254		2.09886	2.80957	12.5648
6.65536	2.27615	3.78978					4.98457			2.8817		8.53854				9.66392			8.54933	2.7165		2.1028	4.90623	2.69306
2.31173	3.27121	3.75236					6.81164			3.77883		3.66095				3.88416			1.88281	2.12763		2.94849	2.98098	3.0525
1.92456	2.15291	0.896527					2.60805			2.76174		4.40209				1.59643			0.997711	2.48426		7.29643	3.21766	22.3122
2.27496	1.62645	4.95921					2.47531			7.28645		15.3058				5.37499			3.98565	9.76595		2.26865	9.4337	6.77513
3.0524	3.07051	6.18847					3.06262			3.18435		5.41925				2.64939			3.29966	2.76646		2.22381	3.8982	7.28153
7.0111	7.11373	4.23958					1.60851			3.07317		15.5676				3.81418			2.48132	3.00651		5.25423	9.43899	3.96089
9.40507	3.77823	4.40729					2.31697			18.9185		3.30118				12.6014			2.20435	6.27098		3.07088	4.96485	2.22443
4.71207	4.948	6.4645					3.29069			5.84747		7.89629				3.19291			3.11301	1.95923		5.98067	9.88369	3.52859
2.29825	3.47296	5.81924					3.32579			7.74335		3.93652				3.78305			2.99402	6.37892		3.37034	7.55457	3.17912
2.7946	11.5833	2.88617					7.12416			3.73364		5.98649				5.81028			2.72293	14.5713		4.64886	4.73638	3.48342
2.03043	9.97942	2.93862					3.16188			2.10571		2.29413				2.85677			3.12327	3.49063		6.33251	4.10873	19.7268
1.77186	2.37734	5.3099					1.73336			8.51828		7.55546				9.87968			2.21069	4.45831		6.70374	6.25812	2.91535
2.43928	4.66102	2.74683					2.02245			1.89463		7.58614				9.90759			4.50599	5.26872		5.50627	5.66816	1.39924
5.34113	3.63557	3.43497					5.25992			4.20223		4.65732				0.0675299			2.88613	5.84503		3.79345	3.61939	7.08034
2.41485	4.01675	4.60939					6.2557			11.2022		2.83562				2.28773			2.77798	4.62422		2.27878	1.10793	3.1235
4.41441	5.73174	4.4895					7.25855			3.2869		11.6378				1.43766			3.12966	3.09819		4.9822	1.58902	4.29456
2.76657	2.5632	5.68683					5.37729			2.30802		3.59461				3.0946			2.92502	4.15784		2.66894	6.38183	2.50334
3.79977	0.802183	2.9757					1.43563			3.85552		10.1102				4.96706			2.27415	2.50319		2.69547	4.96263	3.26561
3.68828	3.56317	3.29564					8.24598			3.27955		7.00341				3.58563			2.70758	2.14662		5.05763	13.1421	7.50605
3.26744	3.05313	3.84501					2.26079			8.92732		10.7533				2.55713			9.71563	7.04583		2.57808	4.77164	2.56432
3.16465	7.09757	1.7915					10.0336			3.7362		16.1356				4.45329			3.26773	3.83398		10.1406	4.67013	7.36824
3.29558	8.8244	4.17775					4.1361			5.99782		3.957				3.83773			3.81563	3.53226		13.5701	7.34841	3.1936
2.54505	7.62263	5.22606					3.7261			10.4009		5.03294				2.74376			5.46238	5.97352		3.00084	4.75955	3.07913
2.48809	1.69894	2.83535					10.0804			1.82879		9.77455				2.67953			0.398297	4.43214		3.14668	4.81765	4.85857
6.42203	3.71918	2.15208					2.30088			3.09737		17.8912				2.83325			7.69474	4.19314		5.3718	6.41908	5.02291
5.59017	3.51777	3.24961					5.37064			2.1483		5.18907				2.03653			2.11627	4.19923		2.22506	6.34392	29.0987
7.42684	4.42027	3.24801					2.47784			2.79767		7.08651				2.59533			4.45536	4.38238		3.30641	6.50292	5.23486
6.4341	4.95071	3.56241					6.25826			4.05177		4.38498				6.47175			4.06879	6.41492		5.18349	4.06788	10.2135
1.88901	3.94906	3.74146					3.33079			2.39319		7.98779				6.84269			2.4794	2.41984		0.881877	3.58992	7.12192
5.22287	3.63776	4.39418					8.72572			5.6442		5.87823				4.0661			3.47329	6.37687		8.50683	5.65738	5.66912
4.03338	5.0009	3.50779					7.28233			3.93816		5.73015				3.26418			4.80438	3.41146		3.25333	5.09023	1.40744
2.196	1.80345	3.44589					17.4195			3.49162		11.3042				4.42218			2.53962	3.76043		8.13823	19.0309	2.88564
3.28671	5.74378	4.56169					5.07031			2.79326		2.58417				3.07208			7.38843	7.13821		10.9135	1.80901	9.01226
3.03437	2.24211	2.00162					2.33546			15.6646		3.15946				3.65482			6.24465	2.1824		2.87307	2.46722	3.78787
3.25733	3.57381	1.80999					7.7081			2.76021		12.9824				2.25159			2.51755	4.30062		3.13808	4.27313	8.36884
2.70448	8.38502	3.86104					5.88635			2.48604		3.39385				2.26719			2.17586	1.73301		5.27137	7.25518	8.14994
2.23643	2.65999	3.02704					1.9693			3.28864		0.925514				1.72126			2.39383	3.57016		1.72579	5.67391	1.7635
3.32328	2.83186	6.01994					2.9011			7.91401		4.60116				4.99407			1.66864	15.6087		2.86881	10.8158	3.57376
2.08382	7.04193	2.53626					3.10805			2.64171		4.84849				28.8797			2.24295	3.83001		5.23013	3.80544	9.86344
9.79443	26.168	3.36509					3.61685			2.22412		7.02139				23.6013			2.92448	1.07791		9.21696	5.98173	3.72843
3.25885	4.30887	8.51113					5.58944			2.69507		7.62505				3.27206			13.9326	8.10891		5.19309	4.36786	5.66756
3.72037	1.73249	2.87108					6.1782			3.1057		9.24569				3.07118			3.97417	3.98647		2.50757	4.06776	3.90255
14.1548	2.24931	2.13182					4.41039			3.24996		2.30028				2.81282			3.03047	4.7046		5.02052	8.75388	7.69089
1.81025	3.55402	15.6445					5.03959			2.96094		5.99884				1.76826			10.6367	1.9701		4.53975	7.41728	9.88772
15.805	3.10639	19.9009					12.9435			2.55783		6.45636				3.0141			3.07988	2.63266		3.925	4.56912	5.40802
6.58675	3.73602	5.99212					2.15006			3.26082		10.4276				2.74567			3.75898	2.28989		2.96649	3.27289	15.4759
2.7993	2.19888	6.96454					7.43372			2.7231		5.91905				5.16842			5.96522	2.63963		2.5485	9.45196	6.0361
2.42683	7.29695	5.40599					10.0062			2.39175		4.12969				2.5758			16.2353	2.17634		2.19485	2.97726	5.32644
2.46313	3.31158	2.74341					9.55922			3.53099		4.78971				3.39964			2.16548	2.64119		3.53265	3.94273	4.32653
4.04921	3.52916	12.3428					4.34142			3.57914		4.57215				7.65874			4.07594	2.49181		5.50121	5.20355	15.4496
4.32382	4.75768	1.89341					5.16831			3.02219		7.4722				6.29685			3.7361	5.51474		4.46747	2.74427	3.26733
2.29233	7.47912	2.34506					7.37437			1.83388		2.03228				5.61943			2.54332	2.55658		6.45209	5.17228	8.79281
2.52935	14.0125	1.96198					9.43964			8.23578		3.58534				4.29191			9.0486	2.30603		2.59231	4.71599	3.40922
13.4245	2.97072	6.07714					3.47165			2.79536		4.74779				20.3864			4.11754	5.38154		9.07456	4.41273	8.78563
8.21751	7.57432	2.11575					9.54489			1.27753		4.20638				2.01853			3.32962	2.71399		3.98635	4.07094	3.97298
3.96193	17.9431	3.36494					5.21561			5.44906		6.95671				6.23489			12.4696	3.32081		3.59425	4.44164	3.43669
3.23802	4.14327	2.69233					1.43413			1.21854		4.19588				22.8776			3.78724	2.04165		2.33899	8.6377	5.84755
3.72914	2.54145	4.12371					3.159			3.41956		4.42989				5.45924			2.96957	3.27327		3.28752	5.43638	4.34725
4.65958	2.98005	3.02936					8.63892			2.89724		3.3416				2.49395			6.11195	2.29821		2.77612	2.52429	2.58823
3.2207	7.36279	3.33561					10.7544			2.45007		1.93747				2.72031			2.7799	7.24082		3.4025	4.80585	1.54244
1.4995	11.915	5.21132					6.8124			3.40453		11.6859				8.44036			4.53478	4.04665		2.26306	3.03482	8.34668
8.16866	11.3321	2.23193					5.54102			6.27066		1.62882				7.77078			7.75873	12.5881		4.37523	10.2199	6.09447
1.63582	2.41323	4.36683					1.81634			4.06912		6.59193				2.18979			4.54654	1.4658		5.16443	6.97429	4.80961
11.105	5.33368	3.60065					9.69603			3.96708		3.90096				3.51077			3.54426	2.44146		5.56852	2.55117	5.95034
1.18308	0.733149	13.5664					1.3341			3.82081		2.93779				6.59909			8.13035	7.4477		4.87269	6.27952	4.66705
6.00387	1.1966	3.59631					6.38361			2.62971		2.80865				3.8592			1.9524	2.18406		8.35388	11.1683	4.95929
7.06888	6.226	2.89664					7.86106			2.72711		12.0736				8.06543			3.28568	3.7311		3.95168	2.67298	7.21122
6.25383	2.27392	2.40068					7.05386			14.3109		12.9295				2.37297			2.78727	8.24867		9.19675	2.43654	6.3691
1.07024	1.95537	4.29887					21.1296			2.42408		4.29989				6.64028			3.48022	4.96199		11.9965	3.62922	2.15514
0.792762	2.62944	4.18049					3.87621			3.44471		2.87898				2.61804			3.7897	1.95943		2.22891	6.62313	5.96129
2.82695	7.22823	2.09107					7.80726			2.46149		4.62252				2.50554			12.9394	6.60982		6.27138	1.90299	5.46699
2.90625	9.09292	1.43651					3.13555			6.10762		0.57842				8.67796			3.45512	10.8608		5.229	5.55102	6.27476
2.93486	3.45584	2.95834					3.08947			2.69112		11.6159				14.6496			4.11895	2.05668		6.40421	5.09632	3.53611
10.7451	9.3538	4.86008					2.6049			3.44968		7.83012				14.5652			2.14068	2.44837		7.87066	6.12172	3.95239
3.61961	3.55446	3.09769					2.94244			3.00158		5.58512				3.55414			5.6616	2.99604		6.53618	6.23931	19.2896
3.36548	8.82239	5.41279					3.03806			2.13578		5.35787				3.53597			2.84223	3.14917		3.53519	3.90886	3.90312
10.3964	7.85762	11.7452					10.4091			2.02616		7.50188				24.968			3.93803	21.1816		2.06578	4.21307	8.82782
1.70684	6.19469	1.77319					6.60636			6.49331		4.81638				7.94784			2.79569	3.85567		7.1709	2.17872	4.44252
4.02679	2.98612	2.14468					7.32993			3.84988		1.48216				2.49753			2.52015	4.80334		6.94113	1.72983	5.01213
2.16175	2.31575	3.45084					2.42573			2.26717		7.66995				4.54105			8.55697	7.52582		2.79421	2.99157	12.6582
7.31547	2.57343	4.88746					2.95356			3.98382		5.45876				3.9438			3.79634	0.762371		6.30421	2.61919	8.1537
5.54115	3.36754	3.76015					5.31698			2.60022		5.98386				4.06241			6.74055	5.38908		4.04898	4.92146	7.59921
4.12943	4.27421	3.09919					5.61011			1.7079		2.35562				2.94624			4.97351	9.7804		6.48602	6.1288	3.68702
3.99333	3.46954	7.465					22.5648			2.72957		1.70322				3.36609			7.94271	3.59313		12.0899	4.7267	4.92323
3.03872	2.56149	9.88443					8.03835			6.54421		5.60172				1.87794			6.6754	2.02229		0.97019	8.52529	5.62807
7.92962	2.05009	1.58957					1.70412			2.45596		14.6104				6.53935			5.57777	3.64006		3.3558	2.86129	6.43018
9.7037	3.17913	3.86945					10.6318			3.7315		7.79057				2.36825			2.31747	4.05066		1.93342	6.98881	4.48001
2.76781	12.7321	2.16047					7.34802			13.4359		5.0751				2.81537			4.38571	3.56434		2.80963	1.52017	5.32058
12.4434	2.51132	1.85841					3.05263			6.39487		3.04909				2.26602			4.50782	3.94518		6.11141	8.29633	7.59202
1.96545	5.20323	9.27677					3.31669			29.3447		1.86281				2.60584			2.18556	3.83257		5.81402	10.1	1.61873
2.26315	1.73992	3.34688					2.35383			5.19431		4.06959				2.91375			1.7991	4.23497		3.84235	26.2127	15.4262
7.08908	12.5625	3.52982					2.43861			2.35465		4.49455				3.74319			3.3258	5.26234		4.11036	7.0751	2.13047
1.6649	2.63393	14.009					1.4386			3.04816		3.34715				4.18409			3.07727	2.24054		5.99937	3.63055	2.95623
9.02737	2.26241	2.76717					9.48727			5.48343		10.3105				2.64951			3.37537	3.33391		3.79407	3.82692	4.24753
2.97828	5.29273	4.16952					1.45148			3.73774		5.93233				1.89376			1.99135	3.37837		3.32361	3.35273	4.99179
3.90747	9.39891	3.1266					6.99327			4.05393		4.50261				34.3191			2.18917	8.77034		5.43466	5.49463	4.92681
2.05026	10.8553	5.18814					3.30191			8.54262		3.95614				18.9646			9.08253	2.55634		6.52151	2.98805	12.1221
2.94378	15.2244	9.13086					4.17777			2.24385		11.7584				14.0199			21.983	9.76342		2.4101	8.00502	1.27834
3.09847	3.45923	4.23365					7.83027			2.57931		2.56027				2.49865			21.5559	3.05622		2.94453	19.3358
3.21092	16.7157	4.99378					7.67396			2.64959		6.40544				5.60812			2.71764	2.21124		2.67986	10.6401
3.2368	3.60761	5.27796					6.9064			5.62591		5.94816				16.3088			3.42135	4.54271		6.14056	3.95316
2.04346	6.68069	6.1429					9.88955			2.89056		2.71217				4.21354			3.9616	4.54839		8.25218	6.57138
2.06123	10.3062	3.39963					12.1676			2.17363		4.9308				4.20689			3.08844	4.43642		2.7511	11.2099
6.35223	4.16676	2.82344					14.7857			2.71384		6.94742				7.48306			2.44942	3.96456		2.54607	9.78062
9.10092	2.64442	2.93987					11.7158			2.2765		11.4928				8.4944			3.72673	2.70208		11.48	2.17185
7.15233	4.51232	4.49465					0.993882			3.03737		3.50962				6.06259			9.9053	2.21433		2.65678	2.84522
2.52674	3.97176	5.40413					4.69875			6.80331		12.6179				2.0386			7.32486	4.63057		2.82227	20.0909
0.859484	3.15172	2.27048					5.33605			2.11116		13.6337				7.64736			3.36168	8.62427		8.17793	4.87118
8.30294	15.2099	1.96745					6.55813			4.25432		1.48669				4.44928			3.10567	4.41074		1.19797	7.3667
10.8216	3.18013	3.10139					2.94595			2.74071						1.71006			2.5018	1.94246		7.00855	13.152
2.96698	12.7002	3.95332					8.57465			3.17526						4.19355			3.20708	4.83443		1.38411	13.4715
2.14167	2.60097	7.59772					13.5927			5.09396						10.3683			5.2811	1.6684		3.17189	2.8153
1.96698	5.37696	9.3614					14.2889			9.2499						9.90049			3.15788	12.5577		10.6192	5.80567
0.630133	5.13307	4.1031					4.63246			3.25498						3.77325			3.3603	2.1534		2.968	3.29122
1.50009	3.89476	3.4447					6.33934			3.24217						4.73103			3.29638	4.01297		4.30659	2.42417
3.46843	3.57629	2.47933					6.03198			5.92667						10.3179			5.54766	5.11026		12.769	2.73511
2.46717	2.60681	1.5136					5.98788			3.75427						11.9438			2.76862	1.26006		3.5647	4.71112
10.1852	2.26946	4.27511					4.18744			3.76362						2.81766			2.69849	2.07489		0.9528	9.01042
22.9232	2.48671	3.83545					1.68872			3.98897						9.26307			6.55428	18.1414		8.40939	15.7679
8.1363	20.5133	3.27743					18.7277			3.41376						2.9919			6.94503	2.18033		2.80445	3.87746
1.87685	5.55578	5.94966					5.76261			5.56427						3.41943			7.9127	13.8419		3.32822	4.22779
1.96888	5.87902	3.75157					9.76427			3.94625						10.04			2.73443	3.17714		1.76833	3.23345
3.90329	8.69791	2.28949					4.48155			3.41514						4.97945			7.68954	2.03166		2.03197	6.4531
3.26491	5.13556	4.87129					10.4609			10.9673						9.16402			10.0331	1.57418		4.38145	12.5634
23.2011	4.1728	11.3466					16.0658			2.92782						2.26585			4.90837	7.014		15.4602	2.08888
2.76342	2.04639	3.28566					1.74138			4.78196						5.52911			5.49657	2.74099		1.69932	12.2618
3.73159	6.45732	1.45552					11.2318			3.33033						1.18784			7.76033	3.14246		4.0829	3.70819
3.60231	2.63926	1.7046					7.85348			13.2814						5.91815			2.38105	12.6046		3.72552	8.22689
2.44613	3.38572	4.46337					5.33146			3.04227						2.86022			3.02368	3.53233		4.66694	3.62771
2.20122	4.4537	5.36396					3.43063			5.31603						6.80853			3.59612	2.82583		4.40949	2.37386
4.3211	2.35637	9.30812					3.98916			10.0656						8.06979			3.14917	4.52561		3.88302	7.74714
4.30371	4.54971	5.6613					2.15878			22.6266						6.53816			4.52738	18.1221		5.26319	12.578
3.57862	3.26134	3.7722					7.16057			1.49802						15.7392			2.53698	5.42453		8.93665	6.64393
5.8305	4.39018	2.92601					5.84206			12.1481						6.84945			5.7679	7.65396		2.21161	9.58661
2.88018	2.70282	1.73231					3.76802			2.03209						10.4745			2.07727	1.66196		2.73355	12.5155
2.73607	3.02416	2.04592					4.44515			4.84808						1.29356			5.14733	3.73555		1.43241	5.63925
2.60251	6.21389	3.73862					9.85317			14.1671						2.97485			4.70674	2.24162		4.6298	2.59658
2.10228	0.779078	6.07259					6.04354			3.49495						6.07354			5.76041	5.81777		13.4391	3.00214
18.4137	8.43859	3.57876					1.77331			3.60816						0.777766			5.03092	2.16658		2.98714	3.56746
2.88625	3.44295	5.21535					14.2468			13.4007						1.86699			2.45514	3.03362		3.28241	3.27448
0.59902	10.0115	2.91849					2.54702			4.58541						10.0359			8.10075	7.98122		4.88757	1.25602
5.66335	10.1622	3.82462					0.43835			3.30345						1.93019			2.8115	1.67948		5.58849	3.19819
8.74479	4.82604	3.20021					14.5035			4.13087						9.91717			3.11133	5.60188		9.7443	3.65336
1.7129	2.1184	5.41659					4.29743			3.3463						3.31883			4.77697	2.99105		2.96735	14.4721
4.06318	6.11831	3.23263					2.8782			4.6798						2.67246			2.36655	14.6974		9.59885	2.56067
2.7717	2.89245	3.3075					8.69451			2.78979						4.70211			8.62213	6.59487		6.23955	2.31388
14.0755	10.2824	3.68667					5.86023			5.77996						4.46442			6.78719	7.24832		0.913457	3.19835
15.6458	14.4855	1.77393					5.10484			3.19759						4.67186			1.88468	5.38029		4.68637	3.4153
0.694849	3.18682	3.82417					2.39641			2.42131						11.216			7.23607	2.25011		6.60162	9.79786
3.29837	3.78789	5.51679					3.2589			2.63926						18.5364			3.05272	9.91043		3.58478	9.22878
2.33804	2.69804	2.31343					2.46386			2.56691						4.71978			3.01786	0.380627		2.26358	1.77191
12.5331	7.93996	3.45618					17.822			1.32276						8.98487			1.43463	3.37205		5.21239	12.0679
3.5019	3.45298	3.81251					2.15209			4.82028						2.32594			4.39299	3.24599		6.36713	15.5494
3.44068	2.77485	2.74218					2.80889			7.44221						14.8385			3.52809	1.85975		3.28497	7.77224
12.6072	1.86228	2.42363					3.81263			3.792						8.87902			3.52484	3.36622		2.04422	3.48858
3.05638	4.67635	9.11277					2.20112			4.64304						3.35784			3.38121	3.8648		15.9455	4.09549
2.00409	3.1008	2.94713					5.09451			3.28793						11.8984			3.32092	8.84		8.82439	5.67856
3.66229	11.5989	8.89493					1.7375			3.69628						4.66615			3.66134	2.57034		14.1216	3.63991
3.01968	2.62986	2.54167					1.94995			9.1051						3.10078			3.47172	6.16566		7.72121	2.86368
2.87011	2.78563	7.25703					13.3775			30.2791						2.432			4.98168	4.9277		4.94369	3.75441
13.1816	9.33361	6.09806					1.98567			2.84979						4.14533			2.49853	2.20585		2.16899	5.6056
1.6305	7.84816	3.0342					8.98018			2.27598						3.54825			18.3129	5.5027		5.582	4.182
7.58247	3.16846	3.18375					2.47931			6.09326						6.83248			2.22617	2.09803		2.30335	4.13046
3.92135	32.2065	8.04475					5.28641			3.82781						13.2363			2.64641	5.91392		4.75794	1.41086
3.07224	2.97476	4.15704					3.4815			3.02393						1.48096			3.54939	8.32037		1.97101	8.49851
2.75142	13.5169	3.83372					6.13094			3.31341						4.78402			2.36621			3.92561	18.6167
9.59296	3.83843	4.12245					9.9148			3.66842						3.53925			4.4975			4.0806	4.2997
1.41026	4.76963	3.63089					2.71121			3.02722						1.97771			3.60607			3.5435	4.85762
2.47259	6.33222	2.06386					4.16686			2.7102						2.504			4.88557			12.5608	15.3132
5.66228	2.21193	3.7039					2.86824			3.51944						2.44529			9.8371			2.87305	5.01108
1.47158	4.33279	4.63605					3.53162			3.36514						1.82967			17.5808			4.21226	1.5795
1.54393	3.26374	3.99926					4.29189			4.41304						18.3596			6.70165			2.708	2.83221
10.2328	20.867	2.37903					1.05279			5.63953						2.13257			4.60302			3.08435	10.6087
5.73352	9.06661	2.52107					5.8646			1.85126						2.07208			2.08532			4.55282	7.46723
3.12337	6.91312	3.13942					1.15014			3.04142						25.593			1.53784			5.95001	3.22609
8.16172	4.97945	2.98603					1.76122			3.07111						2.94513			4.33001			6.16893	5.20076
2.44826	2.85242	6.95699					21.5436			4.12468						3.14013			2.95376			5.49265	2.82825
3.57886	9.66399	2.22604					8.07326			2.09786						3.12545			2.00274			5.7936	5.50133
2.05497	9.54247	2.23299					11.0092			3.43241						9.7926			2.75376			4.75196	3.94325
4.60719	2.0359	1.78285					16.8352			2.08839						8.98784			3.54065			6.416	4.78586
1.87012	4.58762	2.93505					3.71348			5.28712						1.48902			2.75098			4.77171	12.2774
10.6724	1.47293	2.6516					4.56712			5.90141						3.77818			2.719			4.35957	3.58449
2.65334	2.12296	3.50748					4.55386			7.94847						5.09044			4.61662			4.66276	9.04004
2.71568	13.695	2.54534					14.6663			4.36758						3.4428			3.10327			4.87954	5.47971
7.77473	1.74517	4.76329					10.2741			10.4635						10.7883			2.98118			3.19088	10.8945
1.70906	23.6646	1.92183					5.49422			8.28044									7.55076			4.51699	5.40914
1.49205	3.90554	2.45921					16.2667			4.50409									1.53544			4.03986	4.26366
2.79937	4.90062	6.01117					6.5572			9.78661									2.81825			3.07976	8.55914
5.9778	2.44868	3.74829								6.00806									1.85564			3.77387	6.98552
5.24095	3.79104	3.94759								5.34872									5.15447			6.3382	7.21594
13.5364	2.55566	4.7564								3.25684									2.48155			11.0666	6.10112
7.61406	9.9774	2.53572								3.39607									3.58901			3.30125	4.14096
5.85949	3.49166	4.52539								3.55256									2.14323			6.31286	3.70322
1.61014	2.49717	3.49906								3.5107									7.87523			1.96192	12.621
4.22847	5.82855	3.72852								3.3167									4.31468			3.33979	4.94676
4.01096	2.8559	6.50019								5.08806									2.07719			2.36053	18.0683
3.49162	0.658709	2.05522								2.42671									3.01691			2.52246	9.82622
2.33421	1.78841	2.6291								4.20014									14.9612			2.50609	2.87206
3.62183	1.90526	3.37831								9.43162									2.6063			2.58886	25.0832
3.1427	6.23451	6.24662								5.65002									3.11105			6.21785	14.5674
2.93036	10.5439	9.63243								2.71857									5.98162			5.51165	2.64185
6.72178	8.22694	5.32518								4.04558									4.15114			4.64488	2.04808
2.73794	4.03162	4.98325								3.80909									3.44461			3.28157	9.70342
8.35127	4.83419	2.98329								2.76169									2.85423			2.62804	5.7208
2.82689	8.46861	2.50918								3.34021									4.78968			2.80381	3.65791
4.38462	4.20735	4.84453								2.87314									4.99286			3.03736	7.92603
1.94109	3.18319	5.00222								2.04822									3.29834			2.05707	26.2195
2.69455	3.1301	4.03894								3.07113									5.967			5.57031	7.70549
3.68241	3.50954	2.0249								2.5242									4.89317			6.76043	3.4185
6.52208	3.44496	40.0318								3.82954									11.261			7.66528	14.2452
1.84887	5.29334	2.5702								3.18229									2.16012			2.37521	5.90858
4.94061	1.17012	2.78367								10.6324									14.243			3.44939	2.10287
4.12163	4.55244	3.31878								4.06034									3.80175			1.82093	16.3802
6.39306	3.74825	1.27041								16.6704									3.13915			3.82244	1.80591
1.47046	3.53615	1.54709								3.06555									4.07022			3.99362	1.62319
6.3647	4.37257	7.71012								3.53637									3.35865			5.67048	5.34475
2.27722	5.23116	2.73099								3.73165									7.22077			8.3887
1.76137	1.80523	6.00763								2.98504									4.34705			2.11056
2.33679	1.31115	4.0549								4.66816									7.87435			4.76736
1.64983	1.78767	6.00534								3.59389									4.80496			4.91239
1.77419	2.74437	9.47601								4.43528									3.54498			2.25026
2.15283	3.20205	14.1445								7.9186									4.53658			8.94963
3.58934	4.30651	6.19753								4.86013									17.467			9.18061
2.13739	3.19996	3.48887								1.82734									2.65381			3.82389
6.62945	2.54398	2.99415								3.5104									2.78231			2.46014
3.88619	5.6743	5.18253								3.83658									2.09544			3.79494
4.53452	3.75103	5.26582								4.29803									1.78827			3.58661
1.40161	11.1344	12.9037								3.24207									8.55044			2.87606
1.0705	3.72204	6.43091								3.64533									5.5156			14.1245
2.70012	11.3091	2.58207								6.19084									1.93871			11.065
3.65657	2.48717	2.42646								4.13882									3.49031			2.51113
8.9991	10.5246	4.14592								8.8283									3.08436			4.1512
4.05283	7.09775	6.89287								7.14606									15.2691			3.97931
4.73498	2.18743	4.17365								4.19407									1.20882			5.14544
14.2159	8.78302	2.88033								2.10729									3.56151			2.16221
2.54898	1.99066	3.23596								2.27366									2.02358			3.08022
4.98289	18.1274	2.65839								4.71321									2.82556			4.52238
1.56045	12.0478	2.58628								3.19034									3.51457			7.47819
3.86143	3.44648	3.42764								1.6568									2.0027			7.02976
3.29377	10.262	2.78725								11.556									6.99458			4.54135
2.05267	2.1894	4.45829								5.35158									3.19087			4.34333
2.51499	3.88654	3.70943								16.5175									3.46222			3.06632
2.22722	7.51341	5.53162								8.42236									7.49604			7.58205
1.6332	20.1433	2.77952								3.35648									5.86934			3.98486
2.74138	14.6223	3.67376								3.19896									2.88223			3.22146
1.95182	2.81471	3.75089								3.13275									3.2662			9.52859
1.90562	2.89945	5.37957								3.91177									3.06189			12.1795
3.28464	13.6964	14.1173								2.64087									2.2898			4.84375
3.86811	4.44239	2.53866								3.30279									8.55341			1.71362
2.54619	2.11237	2.83324								3.06023									1.89578			5.90019
4.07068	1.57753	5.90943								4.29614									4.60362			1.52735
2.72626	3.41042	1.44605								4.42687									3.6175			6.52025
2.38756	6.40189	2.49775								5.26953									3.44143			9.24274
1.68328	5.78153	2.4646								3.10744									1.99198			3.14482
1.09208	13.3672	4.89098								3.87527									2.85699			5.50058
2.72121	7.82322	3.65159								3.10105									6.35489			2.13577
3.37531	1.20334	3.17672								7.43146									2.41376			3.93305
6.67965	11.0307	4.91828								3.98974									3.71913			12.446
2.36677	4.26426	7.17926								2.94358									2.1581			5.46211
0.841291	5.56494	4.52973								7.94345									1.23641			3.19494
6.16731	0.741565	7.82508								4.14575									11.9116			6.67713
2.72646	2.99613	3.00385								3.03029									2.20113			5.832
5.02776	6.32608	4.06126								3.71906									1.55681			3.04737
9.47459	4.53609	8.17247								8.57001									2.59296			12.2013
3.18266	1.01127	2.67951								2.60034									5.24269			3.98236
5.12725	2.50626	5.54049								7.66701									4.37837			5.68467
1.70318	3.86136	7.9696								5.33772									4.70493			6.85651
5.01047	13.5465	5.06636								1.38713									3.01791			4.03533
18.1608	6.30127	6.21019								2.4602									2.52705			4.65885
0.0761689	14.8518	1.99687								3.41626									2.79881			2.61784
2.47415	3.03021	3.35746								3.44015									3.49374			2.66393
5.72903	1.9579	7.14445								2.89027									16.6051			2.05011
2.02781	3.42133	5.00508								2.75274									2.65968			2.72959
2.33997	13.4974	8.3429								7.01804									5.0821			5.15369
1.81258	8.40331	7.90602								1.24423									9.93533			2.81891
4.61404	21.4953	2.13373								2.72691									5.16781			2.49846
4.06837	14.9377	2.82589								3.56787									2.78173			11.1774
3.99882	0.719541	2.63298								4.31974									3.28253			3.02984
3.28656	3.31387	4.14285								2.75641									5.07305			1.42977
8.1876	2.91342	2.73442								2.61954									4.0392			4.28308
1.90145	2.12152	2.23743								1.61418									2.40468			3.91365
3.85647	4.47524	2.53762								1.92289									8.13044			4.56562
18.8637	2.08903	2.9882								1.99719									2.51226			5.01313
2.46574	2.00489	4.36359								1.87374									2.75275			21.2945
9.5552	4.22604	2.43304								1.53269									2.06275			2.18595
4.17738	5.86536	2.54754								18.8399									2.78494			3.27999
4.21242		2.89231								1.96515									7.23932			2.74163
6.50561		6.48103								14.0963									14.0936			3.7112
3.17987		9.35103								18.011									8.45646			17.1835
3.59488		1.66644								6.34444									4.89995			3.01985
5.44782		2.15514								3.44128									4.10181			7.94788
4.32454		2.8495								5.30889									3.15858			0.508241
3.6587		2.62274								3.911									2.82045			6.23865
2.88278		4.72673								3.90205									2.80939			2.64458
3.76787		3.19901								3.20281									2.6709			2.47976
3.33884		8.33818								7.23076									2.79362			5.19527
3.95205		7.76855								7.21483									2.20478			4.72379
5.5607		3.67544								13.6884									1.76347			2.22016
2.40021		3.1294								5.94615									2.52345			2.48977
4.4872		2.87118								12.0892									7.36659			3.91954
2.85178		4.50222								3.97906									3.74034			1.78656
12.2475		2.62169								3.24102									6.83623			4.18114
1.96243		4.06119								2.92171									4.59973			7.06948
3.95775		13.6193								3.2835									6.09664			2.65814
3.67598		4.32809								5.87949									3.70143			7.35847
2.28731		2.93993								3.39419									2.53465			6.90065
2.42042		6.66735								1.23255									3.91961			5.2976
1.83305		4.06516								2.28642									3.1312			4.08666
2.04575		2.0018								22.0879									2.30964			6.14534
1.83208		2.83671								4.76268									3.91872			11.5148
2.36549		5.9072								3.25289									6.02629			5.04756
3.44784		4.39917								3.34041									4.18921			12.5545
3.52666		2.27779								3.72774									2.26482			5.81578
2.03388		6.63475								3.67442									14.2958			11.0903
2.28687		2.73654								5.66241									2.27103			6.51876
3.47743		4.683								6.95637									2.94203			4.31826
7.82109		12.9687								17.0334									2.11078			5.04289
31.7781		1.40332								10.0175									2.35183			6.74459
[truncated: 724 more rows]

## Sheet: Polymerization V409I
03.02.22									03.09.22									03.23.22
#8	#9	#10	#11	#12	#13		Average		#2	#3	#4	#5	#6	#7		Average		#1	#2	#3	#4	#5	#6		Average
3.5336	6.38569	6.24032	6.52588	7.19467	3.9147		5.36417		6.33527	9.45004	14.4583	3.85744	10.6631	12.4117		7.46706		3.57452	6.25694	4.28292	8.46345	5.19368	4.06257		6.58413
3.47595	5.08266	5.78308	4.47263	3.49335	4.56737				10.7176	5.98604	15.9227	10.147	7.34054	10.7326				3.63662	6.02017	5.63472	6.89961	15.7738	5.1103
4.13006	4.58253	4.92286	5.56242	3.27797	9.81737				6.38836	7.09362	17.0309	5.34417	9.12402	7.4994				3.09371	5.24286	4.68967	10.7108	7.24361	7.39876
6.05983	7.46984	1.7571	10.3058	4.07763	5.51629				9.82214	10.4665	3.01328	3.01756	4.1991	9.87833				4.8361	7.375	12.0931	6.76091	7.35279	2.67354
6.56879	5.53152	3.49457	1.46137	9.46249	3.51642				4.8902	4.87758	14.6253	5.37145	9.69696	12.3883				2.63307	12.8076	11.6416	7.57392	3.3633	6.10444
1.27691	4.58581	6.58403	2.09836	9.33221	7.72916				5.54454	10.1099	4.27908	9.8268	7.17058	7.5838				2.20647	3.63834	3.86035	9.08796	9.6571	3.28205
4.33175	3.41927	2.66278	1.83324	9.70931	1.9747				6.96429	5.82356	8.39777	7.45015	5.56847	10.9586				4.66231	6.85938	4.7242	3.49736	4.58695	5.51428
1.90685	7.40019	4.84782	5.89599	4.30262	3.36004				1.64869	2.98769	13.249	7.76705	7.31925	6.85296				8.23489	7.05228	9.34383	3.02276	7.05748	10.064
1.12097	4.36791	5.59435	9.43868	3.08436	4.06247				2.23756	3.38648	10.4218	3.9706	4.45136	10.0918				10.3781	9.36468	11.8534	10.5136	21.4509	9.63377
2.89981	4.86205	8.86626	2.79297	5.06936	17.6899				11.4746	3.57907	8.87612	4.08886	6.85025	3.60555				3.12114	6.50363	5.89894	13.32	3.29252	5.35402
5.35221	5.19725	7.01188	2.50187	8.72428	5.85821				8.62951	3.86437	5.79112	9.77876	2.65909	10.8846				1.47965	3.2473	3.17652	2.39639	4.8271	9.90057
2.97208	16.1797	9.71632	5.08535	5.46442	11.9161				10.9151	12.7395	4.84756	5.6069	12.8686	4.22364				2.75859	5.08538	4.9344	2.97219	5.32037	4.11913
3.77695	3.36163	3.79135	6.52363	8.86573	2.15648				4.69311	10.7348	3.52009	6.8903	8.73098	5.66102				2.28459	4.08885	15.181	2.75019	4.39082	7.70378
5.75693	9.26273	12.1136	5.35656	5.76181	4.63139				2.37109	2.82921	2.70247	9.96113	14.1008	7.74891				2.868	6.27984	2.6772	3.11212	5.31358	6.13544
4.61259	8.57336	0.987384	5.45458	5.13529	5.89368				7.31426	4.74345	16.6187	7.85095	10.2694	8.5592				2.15591	2.61138	3.94419	7.51987	17.8213	4.23618
4.60857	12.9189	12.2487	2.73621	3.17049	6.83697				5.40877	2.31604	10.0427	6.37633	3.02287	4.66146				4.84244	3.68698	8.14099	4.99966	4.40512	4.07396
8.66256	4.40122	7.67365	3.20066	8.87839	5.39612				5.6665	2.45272	5.62266	2.71081	6.20169	5.42902				4.43324	4.5875	4.19102	34.7273	4.18035	4.07992
5.1949	10.3073	3.25568	2.45491	1.52192	4.79705				7.88843	15.1275	19.6792	3.22305	13.9814	18.9069				4.93032	4.60451	5.42657	4.41962	3.02766	2.68371
4.66001	6.44618	5.21262	2.5541	11.1115	3.53234				5.51574	8.6255	8.72264	3.21341	2.23274	1.48365				3.23907	5.03989	4.54901	4.91338	19.0309	3.2668
2.92279	6.05628	3.59212	10.072	10.3241	4.32706				4.45252	16.7639	7.76217	15.9865	4.17621	6.61957				3.19995	9.82313	3.95636	7.42095	6.09717	19.9965
10.0087	12.4554	1.45085	5.41224	4.78029	2.44797				3.05378	2.1852	10.0765	13.1493	12.0289	5.97641				5.2544	7.58987	8.12192	3.54122	5.00072	1.58196
6.30141	2.3419	6.60197	4.39346	3.90313	5.13118				2.57022	4.39567	8.71795	16.2018	4.06961	7.56161				2.05678	6.17669	4.89875	6.88344	4.85439	7.15819
7.77009	7.85018	15.9641	12.3084	5.79741	5.04096				3.77977	12.278	6.39187	9.31394	6.22263	4.24352				2.60077	3.2401	4.03938	5.84072	6.80071	3.01303
7.51556	7.96696	1.13969	3.73857	3.42774	2.94375				6.66525	5.63968	6.26617	6.30013	10.2065	10.4645				2.9229	4.89358	3.59773	4.472	8.89719	13.4261
1.20519	3.34785	1.81481	5.4533	6.80967	6.8552				3.74907	2.94744	6.67517	5.21972	5.96243	4.38187				2.77679	10.4576	2.90887	7.46183	15.1546	21.8131
11.0229	4.35397	3.74194	6.7789	4.96038	3.14249				11.9136	9.53825	10.8571	13.4927	4.9818	2.38966				5.59641	4.65417	3.84571	3.0718	9.28324	2.76744
4.43162	4.74296	7.03728	6.3886	3.99963	1.51968				24.1971	5.83398	12.1043	3.86766	13.1191	10.5048				3.34907	10.8774	5.29576	5.97187	12.8948	4.15109
8.14563	3.84506	5.23256	5.4014	3.70091	2.44227				16.0834	8.37825	18.5488	5.99207	9.2103	24.4926				1.68588	6.29913	4.12962	3.31172	14.6253	10.1542
6.82637	3.8986	5.86447	5.30225	3.65006	17.3498				5.1765	17.1984	3.51588	3.81288	4.88723	9.85418				3.75215	6.309	5.22452	19.608	7.19524	7.00109
12.5038	6.36734	3.73361	3.80489	3.86203	2.77881				35.1727	8.00441	8.62627	6.02744	5.17728	14.5496				6.20361	5.55459	6.43014	5.20703	8.83956	6.09693
4.46591	4.07458	9.57179	7.31842	5.72229	5.29764				9.96595	5.36851	37.0958	9.27469	10.9157	10.875				1.60961	5.74233	3.1365	9.45356	12.7888	4.92075
4.62737	4.40434	5.37875	5.81597	5.75482	15.5708				5.82731	12.7419	4.7861	5.14062	4.55652	5.19939				4.37577	12.3224	5.65102	21.3562	5.76726	5.94529
4.26154	4.50752	5.20885	4.1992	2.7827	5.9021				4.57368	7.59978	1.53386	7.24471	6.78933	6.19331				5.96765	6.99816	18.4193	15.1914	3.92644	5.45791
2.23259	7.65778	6.65998	6.13738	6.16494	1.38636				5.17656	4.14838	9.31986	7.87935	4.1302	4.3312				3.92153	3.99481	2.59005	7.20932	14.1175	2.99641
3.67967	5.12583	5.44631	6.50505	4.03006	2.75821				5.28971	1.10915	11.7641	2.38938	5.55199	6.9105				3.51455	9.82535	11.0597	3.38806	13.9007	7.87499
3.15391	5.07174	6.31354	2.19304	5.89046	3.75235				3.72915	9.23756	6.28759	10.3225	4.47441	17.2699				3.85365	2.61083	4.50252	11.4056	10.3821	6.95028
3.44425	9.14774	5.17679	4.2266	2.7654	3.11536				5.5155	3.11961	5.92774	11.4476	5.58987	8.74519				6.06913	6.90074	2.53808	1.66902	6.6036	12.8837
3.63458	7.0332	7.73256	4.31558	3.1358	5.25921				5.20646	8.08465	7.38747	32.9926	4.01128	6.66283				3.7049	3.78422	8.38993	2.71656	9.93713	15.9687
5.77708	6.22597	5.72512	6.57524	4.83665	2.79063				7.59431	7.59325	13.6972	9.42748	6.33282	7.70383				8.02476	2.09139	4.61124	21.8	4.79617	9.12113
3.46911	2.69162	7.51868	2.77298	2.12225	6.78274				5.8624	3.41798	5.25304	5.70395	3.90109	7.95487				3.13091	5.15796	16.5374	9.25024	4.28187	5.4038
31.3595	3.08355	5.03477	2.15529	6.538	12.1893				5.04722	6.60989	3.94275	7.2168	5.4295	16.2483				3.79049	6.73018	5.01578	7.99092	6.19426	2.59438
4.52444	2.48714	7.02542	5.17582	11.4844	6.82831				10.4313	4.53694	5.20408	5.45793	3.87125	5.98544				3.80531	4.25412	8.67145	7.43789	5.98052	7.63752
6.29115	5.26398	5.40778	3.27895	2.36306	2.72641				4.83533	9.33577	5.43875	9.29407	6.59347	11.0681				1.87552	4.64846	13.8772	5.27711	10.4178	3.81782
2.65579	9.50002	18.1864	5.83853	7.34542	12.003				9.62887	12.3908	6.24723	5.19904	8.61904	1.98833				2.01401	4.4994	3.6274	6.31556	11.6595	2.04196
4.91685	10.2457	5.05763	7.13631	5.05275	4.75795				2.94682	3.7071	6.88891	8.05618	3.63076	8.33576				4.3153	5.43167	5.52586	2.57698	5.9853	3.73797
4.78702	2.25108	4.63485	3.98938	3.36665	4.16541				3.47817	7.4661	6.66652	3.3779	11.0526	6.97525				8.95974	4.83326	8.76095	7.08801	5.5956	9.56074
3.45339	6.83299	6.43936	7.70818	6.90662	7.99656				4.75207	9.49856	15.7376	11.1094	4.24016	3.20656				8.60051	7.49032	3.29928	8.87449	8.68503	10.7362
5.10416	5.30212	11.0607	9.14361	6.60475	3.72501				7.70856	5.11541	7.40949	3.82916	6.49422	8.97251				4.47474	4.91253	1.9182	3.88646	45.5532	5.83021
3.53988	4.85887	7.089	6.01144	8.96612	6.0121				5.93394	4.24975	5.83911	9.03408	6.66826	6.36212				3.82726	2.17068	2.3742	11.6003	10.777	9.17373
4.65885	5.15278	4.67651	4.23142	3.03355	5.20158				2.39621	11.548	2.05368	8.31307	5.62993	11.0279				2.65557	5.32518	6.68599	8.29953	10.8864	5.85466
6.3418	4.04255	9.89347	5.59847	14.6696	7.74513				9.07004	5.94747	4.59941	7.15337	5.11139	4.86091				1.79355	5.18509	2.58526	19.4547	4.78793	8.7964
3.88619	7.24745	6.4256	3.47542	3.17512	5.30147				9.81998	3.49953	21.8922	13.0797	6.92562	5.2084				2.98457	2.23531	3.3638	2.80603	15.9031	6.35943
2.45248	2.14088	4.96427	2.53395	10.4085	6.35426				6.03851	7.24498	5.04906	3.03946	21.5327	10.1798				4.33343	5.22995	8.5051	1.72703	10.5153	8.38486
3.48439	6.0077	4.79299	5.06781	6.25847	3.72684				9.02896	3.81851	2.85354	3.49519	10.5999	5.95227				2.99934	6.13082	6.11607	4.40199	9.31544	4.10532
3.90886	11.9802	4.93946	5.29844	3.38347	3.12611				8.60792	6.69427	2.22759	13.6112	5.65753	11.9572				3.60243	14.1646	26.5777	8.74925	8.96831	5.5672
8.74566	2.85684	9.92437	4.83856	4.31065	3.8142				6.57172	7.64316	10.9743	3.83187	8.4802	14.8619				3.53342	1.70497	1.34494	4.66502	10.2885	4.4906
4.76928	3.10531	6.16332	8.60127	5.78858	3.23973				4.04493	9.99036	9.62086	5.28549	4.80831	1.92869				4.56877	9.18931	6.29745	3.8616	11.1358	5.34225
12.5142	2.48386	4.31853	5.0571	12.389	3.99005				4.5609	7.81243	10.4562	5.22408	4.7389	6.77762				8.42152	2.8969	9.73405	12.4201	5.7873	1.88101
2.94103	2.5566	10.5467	9.322	12.838	5.24369				3.16805	19.6015	7.16843	8.64651	10.2304	13.0298				3.97577	24.5905	3.22167	15.5627	16.7373	4.03579
2.55715	1.33216	6.13971	6.81862	8.63764	25.1131				7.54106	4.97955	7.39446	3.01299	5.92722	5.46904				1.86518	4.74219	7.52899	5.30175	8.59704	6.40456
3.86193	4.5418	12.9071	8.00225	3.4828	0.997489				4.23663	8.63591	6.97525	7.22888	5.87674	5.20564				3.45052	2.61929	4.56233	7.45156	11.9267	6.9278
6.39691	2.47293	3.58738	11.4542	1.90379	7.40241				9.96643	7.32854	5.24432	5.17487	3.47261	18.621				6.04079	4.79935	4.39788	3.94854	5.44214	6.17137
2.81822	4.9261	5.47237	7.16122	9.7194	6.04485				10.9247	4.3061	4.8878	6.61396	3.28517	4.51345				4.12419	1.75229	10.1565	8.28546	4.77303	5.62175
4.54814	4.45185	7.86214	1.31649	6.45499	4.49216				2.14607	2.19791	15.6935	13.4754	3.58051	13.8257				3.79158	6.26912	5.63199	9.30608	5.81894	1.94069
4.24472	4.84699	4.03738	2.31093	4.82447	5.16954				6.21114	3.96582	8.0009	8.38745	8.57059	10.8192				3.27777	10.0443	3.61452	10.496	15.4483	11.0807
1.53717	5.60838	2.96576	3.09128	4.08163	5.97385				8.50574	4.60169	12.0225	4.20842	10.8191	10.5797				13.536	3.88552	6.56035	3.76945	19.139	9.28088
6.17035	9.49795	9.25117	6.76706	2.90776	9.2412				6.43775	3.82632	6.14264	9.94404	13.4686	5.81393				4.70274	7.85537	3.36299	3.66102	15.6691	8.14803
3.00101	4.99831	6.30891	4.62867	6.48597	3.75733				12.7842	8.9649	15.2317	6.83457	7.46528	13.367				4.25364	8.9352	5.64431	13.63	13.3409	16.1068
5.00197	4.49443	11.4036	4.70894	3.77639	5.9012				6.59299	3.64249	8.42095	17.4394	4.74853	3.25765				3.27361	6.84905	3.39001	16.278	12.7994	6.67038
3.2518	5.22962	7.16103	5.77907	5.85209	6.35225				5.15791	10.4991	13.0349	4.587	6.1943	7.07661				4.64557	6.76907	3.80853	3.56215	13.3443	2.3601
6.99368	4.52893	5.87	5.06365	3.01392	5.22522				6.95938	8.17108	8.37245	7.33789	13.8426	3.74572				0.803848	3.91253	2.70408	8.16849	6.55127	11.3872
4.89428	3.64364	1.86165	5.52112	3.19418	2.12696				4.35574	8.30558	7.30883	7.61197	12.1261	7.81259				3.41698	3.54281	10.8189	4.55618	12.0853	6.59209
3.67089	5.25629	15.9793	8.72993	8.77978	4.11207				5.58161	10.5702	8.13376	19.5482	6.09472	15.9845				3.52277	2.69324	19.3622	3.92911	26.1674	5.86463
13.8061	3.92402	10.7596	4.32306	8.7407	5.36891				11.7561	4.10664	7.44161	11.3654	12.9695	5.64469				4.06158	5.824	5.84367	17.3132	3.29372	5.39469
4.8393	2.26289	1.71665	7.60115	5.10394	7.71062				3.96798	3.37643	11.1488	10.399	7.56343	8.72095				2.9534	7.30959	20.7683	11.4521	5.69022	6.70423
2.38512	3.9691	2.81136	5.11851	5.95459	3.47952				4.10893	2.469	11.3925	15.9847	10.7773	5.61185				2.77644	6.16413	7.61574	10.9108	4.54513	3.89427
5.90108	2.59452	4.94419	9.28051	3.1358	12.9589				2.84492	5.2602	5.40731	27.0982	8.56104	5.73213				3.24193	6.82061	13.4861	6.94235	8.95293	5.90141
2.66145	1.23345	5.68885	2.69774	5.19122	8.5756				5.04145	16.8563	16.3728	4.57285	10.608	10.5176				3.83389	3.5292	5.01532	2.86107	4.76767	5.60156
4.1534	4.17521	5.88111	3.76703	3.54767	2.8583				8.11204	10.3535	8.20995	4.85333	5.99938	8.26043				2.01987	4.60621	5.37504	6.51767	26.3797	9.30509
4.13661	5.03741	6.34167	4.53012	2.97522	3.82946				8.47904	15.1466	5.98779	5.06873	3.42049	6.04471				3.09505	5.52526	6.06053	5.01623	11.2006	11.2444
5.77728	7.65356	7.88944	1.29002	5.09095	6.76155				5.96371	8.07482	3.69268	6.18074	4.02423	7.14761				4.009	8.82555	8.21646	3.74281	21.5866	11.3259
2.79719	7.28405	4.61732	6.304	22.214	4.06126				4.72251	7.19462	15.7156	9.32021	6.99622	3.39896				3.66395	6.25311	5.89802	6.4123	12.2661	3.99152
3.45972	1.74584	7.76405	3.81826	4.07557	7.00948				6.48309	6.97078	14.1166	9.43812	8.50237	11.5953				7.32996	4.30434	7.94359	6.27802	20.9041	5.24063
3.71185	6.52407	5.00463	10.8465	0.780366	3.16591				11.0793	2.54526	7.71733	27.2704	7.32793	20.924				3.5845	5.02734	4.412	8.12306	7.54258	3.31037
8.54567	3.2082	1.94355	4.62953	5.82055	2.86481				4.24028	12.8229	5.20459	3.9382	11.6567	5.27854				3.52815	10.4321	5.34973	4.31827	9.44245	13.2795
5.7279	4.11839	2.14457	4.62926	10.4461	3.40095				4.13692	9.55652	7.78488	6.48777	5.13893	4.93858				1.64676	5.54615	5.38086	4.98314	12.4566	5.07378
3.61673	5.78125	6.15829	5.4923	17.2007	4.80899				4.22455	7.14887	8.70213	2.84882	9.97601	7.75134				17.0371	5.90553	9.5226	1.3388	6.15363	5.0587
4.38345	3.97135	11.2033	4.60266	3.06949	2.6268				4.55923	6.49114	7.74438	16.5889	3.85206	14.3921				2.40512	5.70446	6.42472	5.47041	6.68627	2.27933
2.76026	5.20933	7.84046	8.76977	3.69308	2.51856				5.52466	11.7753	9.13496	4.326	11.2805	1.49587				2.20745	4.44829	2.53131	10.323	4.35815	4.23683
2.25826	3.22584	5.3381	9.50307	3.47361	2.46274				6.55189	3.78134	2.53093	25.2001	6.99435	3.46058				2.32213	3.51892	9.37003	4.34417	4.47626	5.22977
5.57133	5.5816	6.42978	6.90832	2.75717	5.91971				3.99988	6.81141	4.69514	7.12023	5.82318	12.7423				5.98426	6.32962	4.39962	3.94553	6.35633	2.28378
4.83692	5.71574	5.91588	5.22049	11.5423	1.18054				5.3206	6.47499	12.1622	3.22799	11.3117	5.1877				3.90827	4.13491	7.99426	6.33372	3.37382	7.60747
3.47277	3.07537	3.74307	2.11459	4.40906	2.8346				2.02891	4.77707	3.51841	17.1524	4.88131	8.07268				4.29816	6.70234	2.49476	4.58054	4.23823	4.62874
5.71331	4.32276	3.88063	6.19299	6.65298	3.09233				3.82888	8.70003	7.53251	13.8205	4.19448	17.9067				5.0085	4.66569	16.2948	8.82019	3.46225	24.458
1.42108	2.9681	4.73726	9.39234	1.45632	3.40748				2.19386	11.6173	10.6399	5.67871	8.86743	3.31284				2.94161	1.45719	3.48031	3.1212	14.4355	10.7283
4.43587	3.82164	9.98902	5.03825	6.32346	6.31692				3.68388	10.0683	8.7988	7.30422	10.5829	3.41283				3.20455	2.58169	23.5924	4.82094	12.2724	5.33725
2.56935	3.89437	4.08442	4.36135	2.3502	4.7889				6.0388	10.5016	9.81729	8.02627	8.188	21.0494				3.03589	5.98745	7.49793	11.2118	13.3132	7.82611
2.89483	5.94756	3.70768	5.1471	5.41416	3.13948				4.21605	6.07523	11.168	6.50956	3.68869	7.11588				1.18388	4.3024	5.4292	6.13026	24.4227	6.1732
6.23943	2.74108	4.34931	3.94615	3.70104	3.38619				8.40045	5.64231	4.59738	10.4672	11.7072	4.02598				3.24418	4.74666	16.5171	3.7423	3.46204	3.16431
5.63775	5.832	5.43226	11.512	3.27319	4.10051				6.02915	3.3703	7.97331	6.89286	8.6652	15.6802				4.52939	5.86626	5.86098	3.03979	10.0675	6.0987
4.74215	3.29071	7.80122	5.65713	13.2571	4.02908				6.71281	8.78414	6.52607	7.05267	4.51844	5.6587				5.55438	7.41015	4.02886	4.54277	11.1803	2.80638
5.0307	7.52332	10.6239	3.0758	4.5192	5.16163				5.31597	16.347	7.84536	7.4694	9.4491	9.49079				2.12223	10.6174	5.08513	11.2389	15.5549	5.11675
4.45584	3.49372	3.15809	5.19063	4.57191	7.7891				11.6014	5.5974	8.69921	8.02991	6.6728	6.85324				2.15244	4.09236	7.25236	4.30497	7.17683	5.55451
3.4113	2.29698	4.00878	5.63675	2.50558	4.50305				5.43573	8.1446	3.24271	8.26936	3.68672	8.77642				0.802983	2.95182	12.4958	11.5638	6.66774	9.7653
3.68706	7.30549	3.57936	7.21474	2.94072	3.41518				8.64568	8.2943	4.04081	16.71	16.7251	14.1791				1.57815	3.39176	8.34172	6.70051	12.145	2.389
4.02472	3.92163	6.22248	6.26557	2.88149	3.67403				9.37627	10.0908	3.43947	16.0626	11.971	5.03116				1.01808	9.3816	10.8108	4.30887	8.24093	5.90181
5.12455	9.33948	3.99165	5.16361	7.17887	7.46748				8.97041	7.28155	9.86481	2.83962	2.38038	4.56258				2.03829	5.96789	4.73419	5.86344	3.49624	5.46572
2.95273	5.59909	4.29764	6.82249	7.60146	9.97506				17.801	8.509	7.55345	8.37365	6.18153	21.9902				1.95357	3.23777	4.8348	23.6857	10.322	7.17489
4.023	5.36006	4.20866	6.93759	4.47393	9.03985				4.60362	11.0643	6.9801	3.96229	5.04667	2.81848				3.45921	5.45589	7.13401	8.0765	25.3646	5.69898
8.31337	2.45016	3.8271	9.84085	3.69991	9.66889				7.2432	4.15342	6.32909	7.22599	7.26142	6.58304				4.35259	7.91212	4.76084	1.77335	3.98787	5.45955
2.84458	5.80542	6.07887	9.10638	5.45659	4.66336				7.53424	3.20057	5.59562	5.63768	6.34018	9.86444				2.64266	3.26493	2.03311	6.60298	4.97423	5.02411
2.85748	1.62871	9.46835	5.62385	3.6303	6.21841				6.54872	5.05706	6.84677	6.25593	12.6433	6.86546				5.24745	12.5031	6.89274	5.8755	8.05758	14.0799
1.92827	3.11773	10.1149	5.70508	5.36712	2.6311				22.737	8.15427	5.12303	7.76689	7.31432	11.6606				2.15829	6.30688	6.21872	4.21173	15.0123	8.99433
2.3768	3.70517	3.19551	5.75774	2.18502	14.095				4.89817	7.54799	14.255	7.36573	5.87008	16.2975				1.26686	3.9581	6.72687	3.78551	6.90053	7.28326
8.94689	3.30807	9.44533	3.60795	9.73402	28.3001				5.84796	6.20293	13.332	5.94185	7.50071	10.4304				3.72446	4.31132	4.33326	5.65237	7.15995	5.30431
2.38128	3.82146	0.988309	5.72196	4.85086	1.7953				2.63445	10.2338	12.6243	12.7364	4.35512	4.81098				9.85496	6.86694	5.60136	4.3573	6.58573	12.8582
19.8085	4.67601	5.1227	3.45479	7.94459	5.07837				6.60902	5.9565	11.9416	9.36236	9.85185	5.43458				3.74309	3.81831	5.40213	5.37173	8.02583	4.38255
5.67762	2.72057	5.01891	3.94457	1.94533	22.5561				11.6994	2.49751	9.94504	9.08186	4.12695	8.78485				3.83185	8.2072	11.1232	10.5388	2.94563	1.5059
3.48624	2.34979	6.27956	7.49223	7.55084	8.00955				5.66096	9.26453	23.0159	7.22257	8.76536	8.62497				5.38055	5.27237	4.56733	7.00079	3.58199	3.20139
4.90828	4.76162	5.27616	5.02281	3.57438	3.77215				7.84372	4.46831	7.41054	2.88105	8.86364	15.9169				2.24881	3.15233	9.86557	8.34902	5.67335	3.62277
5.15424	5.21962	6.78161	3.5193	2.25895	7.80941				3.12713	3.91891	6.25845	8.98671	5.87738	2.49757				3.27602	4.65856	2.7919	6.38211	10.5789	15.7702
3.17185	3.22853	7.42964	4.44464	11.1352	3.83883				10.8006	12.1558	6.79539	3.51445	6.25283	6.22586				3.04203	9.96429	4.1584	9.13921	3.8205	7.79184
3.01705	4.33259	3.16082	2.36101	5.09778	3.38278				3.22298	5.87795	4.78674	5.45221	2.67546	7.17918				3.22994	4.58506	5.60752	1.44083	2.8662	3.16698
3.12478	3.35418	9.72364	5.78803	4.15078	8.75508				9.16019	3.52633	6.0834	6.55208	9.69333	7.86084				3.6785	1.73514	1.85271	3.75268	5.39697	21.1062
3.75231	4.02371	6.35625	4.68009	4.75013	3.02117				6.60077	7.92908	13.8581	6.71521	4.7393	10.2155				3.4992	5.04914	1.91357	8.69681	2.66185	3.36756
2.68125	4.17459	5.51295	6.79644	6.51565	2.83868				2.78473	3.69118	29.6763	7.60418	10.0645	10.007				3.83455	2.68767	3.26771	5.79928	6.74348	3.34305
2.2237	2.51887	8.671	5.17299	5.03416	10.7333				11.6212	16.3335	3.21764	7.47442	6.70906	6.35394				3.27032	21.0063	12.8735	1.73261	10.2676	4.14517
3.56097	3.5087	7.80384	7.0645	2.73808	5.76101				3.36716	4.69226	17.9499	8.00348	2.14539	4.9448				3.19143	7.37165	4.92368	3.53457	2.14392	7.38925
4.57477	5.74227	3.14583	5.66521	2.24858	3.99513				5.24644	3.02675	4.84233	7.99407	10.4988	6.4532				3.43265	3.71003	10.4808	5.83218	12.7397	5.43719
2.94349	8.67356	4.72571	4.58702	4.79751	1.73861				2.8523	3.53008	12.0661	5.46139	5.44606	5.04515				3.86694	4.47372	10.5709	10.4609	7.46057	14.0288
2.44048	6.80658	6.05808	3.33393	6.02717	3.50553				16.7953	4.98409	15.2693	12.2744	6.70459	4.93073				5.82989	4.44135	3.17213	4.23577	4.89561	13.8032
5.0533	6.55225	3.87739	3.54518	2.73333	3.14122				5.98636	10.01	6.75534	6.68454	5.6996	16.0296				3.10378	7.84651	19.3899	9.32034	3.17077	5.1695
5.25672	4.56836	7.66405	5.49197	3.40577	3.48163				6.99844	5.07376	7.08637	5.9211	9.3613	1.32926				6.11357	4.29995	6.29219	12.5263	4.51469	6.88124
4.87914	4.46319	9.4012	5.30247	7.7378	2.10419				9.9443	6.85749	8.07083	8.20822	8.22586	4.05232				4.07936	4.66088	5.66263	13.3346	7.18643	7.32852
4.33255	5.0576	9.63418	4.69974	13.574	2.99074				7.12027	9.2965	18.5876	5.55313	6.31425	7.70814				4.14375	5.61662	3.81305	9.5823	8.49615	8.74448
2.29353	3.87212	6.37823	3.5477	5.38071	11.8269				5.28235	2.48919	16.5757	7.46497	3.1887	7.3418				4.58715	5.81951	5.16507	8.87067	13.0063	5.34336
6.13128	2.79541	2.54702	9.65026	5.73536	3.62233				9.16207	4.79805	4.61623	12.1262	25.5997	14.515				5.46927	7.6795	7.22656	18.137	11.0937	5.74324
4.04452	9.76642	7.27228	6.7224	4.03768	5.52745				12.5729	6.57683	18.6574	3.63645	2.59884	7.5397				1.74538	17.2234	7.01806	5.75418	4.42417	12.9617
11.0801	3.94861	4.58694	6.21913	12.4923	4.86923				21.1205	4.77429	3.15154	7.78881	7.06496	6.45646				3.29586	8.73065	5.41094	8.61165	5.53801	3.99664
9.48516	4.73532	5.0917	6.95795	3.41063	6.8155				4.14153	7.32317	26.1663	15.1066	6.46639	13.0869				9.32648	3.84058	5.55926	10.3537	3.20987	5.23944
2.81686	7.24423	2.56804	5.3532	13.0284	4.12554				2.98194	4.56335	3.01032	15.1234	2.28538	2.30471				5.47852	1.01807	3.71865	6.19498	3.21707	3.43684
8.03837	3.79962	3.53548	2.87802	0.714109	3.47329				5.08245	6.64851	3.71455	15.3246	9.19282	13.1146				2.93987	10.9432	4.81822	10.8239	5.08267	3.98159
6.87333	5.37659	17.1107	2.98881	7.65598	5.99618				3.45084	6.94928	9.58302	11.7761	11.1515	9.67621				3.6124	5.71846	20.752	4.05859	17.3075	4.44045
5.92917	8.08321	3.50554	1.29439	2.89717	8.19504				3.69478	6.59134	9.2992	4.50725	11.1255	11.4339				5.34411	5.5982	2.6941	12.3961	7.22685	8.41551
4.65757	3.5131	4.25612	3.49292	5.49219	5.66048				3.17207	11.7049	4.39299	20.7379	2.88023	13.044				2.6977	17.5794	7.71756	4.89308	10.3914	7.18121
4.76276	8.26968	2.07175	1.83174	9.0222	5.08694				6.15748	1.88122	13.05	4.5858	5.64313	7.31661				2.70404	3.08396	6.49974	4.97258	12.7411	2.68973
5.84722	5.34475	6.62068	1.71771	8.47747	7.55012				8.07988	6.65598	3.58291	12.9593	7.14319	9.53331				3.20741	8.88381	3.02966	9.79279	12.7002	2.18045
1.86585	2.71716	2.97885	6.06237	4.63754	3.99092				16.0761	6.45727	8.52159	4.13266	3.82238	19.7942				3.1253	12.2637	2.81275	12.5668	7.4075	11.9728
4.16242	5.66903	6.22662	4.3901	2.90452	5.7457				12.3761	8.56163	3.10566	2.65867	4.15278	3.94264				2.17594	6.02957	5.65812	15.6795	8.66847	4.66913
1.71816	6.28893	11.6472	6.5051	9.29217	3.01866				4.26216	9.41135	11.3354	11.5774	5.33274	6.52459				2.63588	5.12	1.66293	10.7172	6.03741	6.76297
3.51078	2.78715	6.07716	5.99292	7.22946	5.59332				4.86847	5.79785	1.24994	4.36691	9.38007	5.09617				3.00363	6.3005	8.29572	7.01283	9.05943	8.36631
2.81526	4.82172	7.05829	3.46267	5.46986	17.1835				9.94337	6.69142	4.42993	15.0167	4.34793	4.22016				4.28477	4.31028	3.98102	6.18164	6.37408	7.00145
2.74487	7.00418	5.03827	6.51956	11.4247	2.4423				15.6147	7.0986	7.19633	5.53714	5.44875	7.90843				3.28406	12.4442	9.82641	1.94488	14.5711	9.04473
1.57757	6.37513	5.35237	2.35012	3.59282	3.08631				7.81947	9.52495	7.82479	11.8137	7.86173	7.85467				6.22463	11.119	2.61779	5.11385	5.09087	4.66123
3.003	3.01252	5.40399	4.17777	4.78838	3.51149				5.87865	5.25285	10.9157	5.55739	6.57466	10.2661				5.0346	2.33536	9.86117	5.25026	2.63479	5.60078
4.39876	3.78182	5.927	4.49531	3.11264	11.2289				9.75088	7.69512	1.27915	4.36222	5.74453	6.83618				7.93584	3.97388	3.42748	6.77829	8.52788	7.98002
14.6207	6.68932	3.97859	2.90763	4.15344	6.96977				7.80918	3.30566	13.6551	5.07696	12.77	7.6238				4.36302	3.18255	4.74182	7.73284	7.65604	10.7963
2.67727	2.83759	11.7379	2.84697	9.11214	3.72075				6.22119	6.4063	15.8715	10.5987	5.81339	7.79072				6.90668	10.2527	2.90696	8.17049	9.63004	4.03503
5.74072	5.2324	2.93347	4.49024	2.79792	2.57275				10.7574	6.28344	8.00612	4.15169	3.88951	3.89917				3.37691	3.60487	8.55579	5.68325	6.58355	8.54851
3.6114	3.47157	5.46571	3.50505	2.23205	2.19903				9.06847	11.5257	10.3821	6.61702	12.0547	6.04475				2.41005	9.59396	1.48229	3.49905	6.59285	9.28077
3.90085	3.80503	6.92299	9.02026	4.77721	3.09032				4.28512	6.58488	8.10391	5.51363	5.37691	5.74251				4.91599	7.54824	4.00647	5.90159	9.10267	3.35367
2.90896	3.44737	4.62704	3.71192	3.70279	16.1966				17.9055	3.44299	7.02675	11.3838	3.16507	12.6591				4.19295	4.14683	6.41817	12.6282	3.8688	8.61593
5.95659	6.7112	22.8679	6.39417	7.28179	4.76536				5.02996	7.78898	16.5958	5.06444	6.80139	2.95359				3.31354	7.93455	7.63363	8.77874	7.56723	8.80975
9.02507	4.6521	3.49489	7.71663	5.20488	6.64282				4.87998	4.12072	11.2406	9.2769	3.5611	22.771				6.92426	2.91272	7.18118	7.46892	5.36658	5.59749
6.24928	5.83782	3.26193	3.9931	4.64468	4.33903				10.9611	8.41805	4.16133	4.00333	9.16805	8.2908				2.61463	4.86469	4.0392	5.22498	5.48281	8.60911
8.28403	4.9956	4.08567	5.48633	0.989798	4.49796				3.99256	10.6304	2.62797	3.9225	9.04725	6.08448				7.60674	15.8682	4.63431	10.6512	7.91544	2.24619
10.681	3.41631	5.07154	4.23199	0.864017	3.97343				1.38023	1.53019	2.52372	7.81122	8.99046	12.2124				3.72737	5.9086	4.91809	4.83866	3.91474	14.2555
1.6785	4.44962	7.33652	4.66437	5.18344	5.52501				4.74299	1.88733	5.02969	32.5554	7.47784	6.97617				2.11885	3.10698	7.36011	3.8195	5.47677	10.1607
2.50361	2.62306	2.34654	7.43776	0.904925	7.2479				7.93325	5.76587	2.14925	5.56487	10.3868	16.4722				3.52892	4.9372	5.02704	8.29878	6.3745	2.95255
8.55581	2.77868	5.36295	2.38716	1.25473	4.9826				3.79191	6.01803	21.0744	4.2337	3.99372	21.332				4.26925	6.71677	3.91881	4.44743	4.67989	9.6586
1.10448	3.07622	5.15577	7.15412	7.10254	2.90065				4.18876	6.46689	13.7233	4.55795	7.69923	5.12712				5.49833	8.04064	5.90866	3.80526	11.8815	10.9606
2.83417	4.36677	10.459	3.35462	12.0868	11.0783				2.63381	6.94983	16.0897	11.5083	3.76684	3.59401				3.21128	1.97836	5.40708	4.34391	4.95269	6.95741
4.30414	2.1535	4.38669	6.21717	4.29723	6.85073				3.39424	8.86335	9.02901	7.38695	7.60745	4.41738				2.77866	2.4553	14.2839	9.67622	14.9195	5.69653
3.431	3.13921	5.04451	3.46967	4.30147	2.46328				3.66689	7.00976	10.895	13.2354	6.79412	6.19919				3.47734	9.82187	8.73736	28.8027	12.3018	7.90521
9.97473	9.77752	10.3779	4.76646	5.14309	2.48336				5.04921	6.85818	9.85702	4.42864	7.45205	4.88613				14.3694	4.46384	6.62404	10.0141	12.7754	3.89757
3.93967	2.63059	6.83998	6.85126	6.32737	4.17049				3.72047	3.16222	7.59801	2.58385	10.853	5.35878				4.9985	3.79759	3.08642	6.46134	8.80585	8.50115
7.09264	4.2108	5.51235	4.25755	7.12391	4.69327				3.06617	8.95745	25.8435	7.1574	4.42954	16.8352				1.66708	5.42128	2.63115	9.69342	7.09123	6.40289
3.10132	2.33061	3.3698	8.03126	3.28776	5.69148				21.9099	5.41195	7.13087	8.66941	8.95194	8.43883				11.3034	8.86592	7.41733	6.44572	6.88047	4.58493
2.79009	2.98189	1.85464	3.40997	2.85058	1.83074				8.00044	8.12586	5.22888	12.8609	12.5471	3.60618				4.11164	4.17932	4.21648	4.84281	6.10582	8.33311
4.86338	1.89032	10.7331	3.95324	3.05849	9.22973				7.52725	4.16977	9.53283	6.64735	4.14169	4.40689				3.75666	7.39639	6.49216	4.67505	3.94654	5.22198
3.66286	4.68935	8.48442	6.477	3.40387	8.42198				8.84592	8.1765	2.28121	11.5546	7.26155	17.9477				9.7566	4.52169	4.54811	6.20014	16.3569	6.2233
3.71162	1.48156	3.96933	7.76867	9.16727	2.58234				10.0492	2.37301	4.19334	7.62782	4.9016	1.94947				2.13139	5.82554	8.13782	2.09475	3.72261	4.0055
4.05608	4.76657	3.89222	4.47721	1.32332	4.40302				3.83759	9.16017	12.5688	1.44864	5.1155	5.26087				3.35681	8.86224	4.10382	5.39797	8.71489	5.36043
6.24605	6.95561	4.96072	7.39284	5.44881	14.3942				7.78802	6.586	4.83505	4.9515	17.0577	9.44779				2.53219	5.11364	6.2039	7.17333	3.32046	3.66401
3.03739	3.16938	10.0005	3.44869	3.49061	7.66298				16.9893	15.6718	12.6543	14.4048	7.83338	2.53484				1.0255	8.76326	15.4049	12.6358	6.71666	6.09759
3.6385	7.50474	2.18753	2.61745	5.22231	5.21921				23.5612	30.7209	5.89387	3.80583	3.23517	6.59861				3.28543	4.39476	13.3287	2.19578	12.5381	4.72326
7.36873	4.57684	6.55807	5.46869	7.59381	6.04839				5.07838	4.5992	10.2913	10.9056	5.01796	8.34992				4.20181	5.14281	5.31069	5.80836	8.37936	3.76146
6.87871	9.43073	5.5341	13.2734	6.23397	6.49814				6.66157	5.54103	4.13324	13.4261	9.84723	4.04166				4.75404	8.60547	11.2465	7.10387	14.3881	2.29301
2.67983	5.88961	5.43407	3.69376	2.34232	3.38906				22.8851	12.6686	12.7355	2.11712	4.16515	4.60243				5.59678	13.8867	11.5081	4.78437	7.11073	11.3914
7.40568	4.60226	7.43581	3.68629	5.75867	4.82067				2.67608	7.44106	2.0482	8.1394	6.21922	23.0019				3.26628	5.50516	5.94965	8.70527	5.14988	4.92391
4.6988	3.40021	4.24293	1.71374	3.96494	4.22187				3.27197	8.30288	7.62587	2.8504	4.20788	2.79732				4.03969	5.05891	5.12482	2.80707	5.37737	4.0736
2.86122	2.65258	9.08175	4.69178	5.46076	3.3328				4.08243	5.16392	9.29338	10.6024	9.83944	7.35525				2.26702	5.42286	5.84322	8.99853	4.5945	4.70402
15.8649	3.85606	4.20616	4.71112	4.97125	3.34106				9.2967	5.91587	15.3084	12.3826	5.28805	9.21082				4.93243	6.08955	9.5579	4.96218	6.35012	10.3064
7.96984	4.62364	3.31476	7.88834	2.83154	2.60139				11.3019	29.6277	9.12979	10.2814	3.6286	4.04903				6.15879	7.82844	10.8973	5.48954	9.2694	7.83473
3.04317	3.07549	11.1946	4.63858	4.08547	4.16785				6.90481	9.32773	13.968	4.31507	5.37362	6.7587				1.82023	5.11497	4.8775	2.43672	7.98972	3.01015
6.64507	4.40626	7.02079	6.06166	13.5347	5.54565				4.06712	8.05267	6.24274	8.09359	7.39399	5.85145				2.71532	7.86557	11.3137	3.9109	11.5362	9.88597
2.65624	6.63732	6.76247	5.12834	3.25063	4.83322				7.49484	5.03568	5.36987	4.32488	7.81976	10.5101				2.53183	6.64326	14.5789	5.97714	2.22997	5.82455
5.89721	3.30032	8.096	4.543	3.27771	5.9086				8.31156	9.21597	8.83713	10.8774	4.25398	7.90644				6.29296	4.09705	4.08611	3.16239	6.35685	7.38717
2.52045	3.702	9.12615	3.5025	3.83941	12.2953				7.58913	12.1922	5.82166	7.71332	10.8019	3.87075				2.0248	13.0224	12.3544	2.86968	3.72139	6.01856
2.11162	3.00598	9.27377	8.6096	3.67675	2.2499				3.59447	4.15912	13.696	4.67742	4.17135	10.771				2.65473	14.24	5.78408	5.34699	11.2798	5.61096
4.13098	1.19854	7.59147	4.31408	2.79825	3.09546				3.23989	11.956	4.697	3.61794	7.03099	1.52905				0.833668	8.46186	2.03493	12.5155	3.25658	5.00441
3.47082	4.71205	2.16723	5.43267	4.68943	7.14232				4.88258	10.0435	3.43822	4.9338	3.09325	9.86769				3.71092	2.50001	0.917709	7.08699	3.97431	6.52051
7.06263	5.54569	4.1271	2.71942	3.89062	2.34704				14.0351	17.0413	5.83905	10.5877	13.0755	6.78668				5.38709	1.75414	7.14276	9.93586	11.7017	9.04839
3.65169	5.19687	10.0728	2.52716	8.29822	14.0431				7.32094	5.24105	8.17145	2.54817	4.21503	8.0932				7.98605	4.80096	3.29598	11.0253	12.3702	5.5544
2.60891	7.42337	10.9412	9.23585	5.86892	4.79272				14.9817	6.86834	6.16892	3.39299	3.91625	6.06395				2.84521	3.96619	10.0465	3.30759	5.69755	3.81228
5.6138	4.45024	3.94338	3.93366	2.56648	3.02341				4.27005	9.60635	6.45932	28.1144	2.62219	11.6674				8.00614	1.60056	0.899639	6.07835	12.2222	2.47865
7.44265	2.07138	2.15671	4.01443	6.518	3.03546				17.4091	3.86324	6.24217	4.26488	9.475	5.78151				3.66849	7.18763	2.35029	10.3039	5.0269	15.2797
1.91689	3.07692	4.28788	4.39502	3.09078	4.78921				9.24692	21.1399	12.5972	6.65622	10.3831	10.3435				4.02058	4.39441	2.63721	4.98349	6.80274	13.8138
3.67706	4.8545	7.75002	4.6334	3.53575	9.94814				1.21953	8.47592	12.9545	3.36091	5.89051	9.43746				3.79817	12.4328	10.3393	9.84026	13.2388	4.37967
6.36197	4.10256	6.15172	6.35314	8.35098	5.81982				3.73443	1.49858	12.6661	6.68829	2.07193	5.34893				2.95723	9.9954	9.02944	7.5967	8.45054	3.56962
4.08383	2.93735	4.3698	6.63122	0.636664	6.42046				4.69637	9.93935	8.86914	8.75182	3.01768	8.21429				3.66446	9.6489	10.8671	7.05306	4.34188	3.97057
9.86872	3.09534	4.76421	8.99228	15.8116	2.38702				12.4061	10.1897	7.87873	3.49699	2.1681	9.61638				2.09192	7.07432	4.90443	8.22745	10.3093	8.18672
2.86507	3.33947	13.6546	6.83788	5.46035	4.22766				4.353	3.7294	13.5625	5.00949	5.77999	7.91715				8.76339	2.28095	6.83827	15.9435	5.8398	8.08078
5.06813	4.72712	4.81237	3.72158	6.14652	4.09895				6.51023	6.59703	8.44334	6.51993	8.8039	2.51835				3.50508	7.61202	13.7152	14.178	8.81982	2.67835
2.3906	4.42365	8.59078	10.6711	3.83675	3.85136				4.92226	5.01291	11.0632	6.85442	4.71612	4.51275				10.5108	8.44083	9.18325	5.44692	8.53716	5.17908
3.43515	3.06547	2.38173	7.17435	4.06487	3.47372				11.7954	4.83748	13.7362	4.82818	7.87254	12.6431				9.67878	11.5428	8.8853	7.04465	6.63078	5.15797
1.86121	5.57538	5.63818	7.37042	2.74998	1.90092				6.03892	8.77039	7.54016	6.79685	6.44069	5.91209				11.667	5.9702	4.89437	3.03878	6.61563	6.70597
1.8983	2.62738	2.11362	1.45108	2.90577	4.1953				5.26775	11.5711	11.9224	8.60379	8.68528	11.0757				4.69292	2.38035	4.76486	15.173	13.6948	5.9293
6.63425	3.95502	4.69942	9.04103	8.03825	7.43264				6.21503	3.65784	9.91825	7.33715	4.93845	7.9964				4.0941	5.9842	10.6456	6.06041	3.94621	4.87332
5.06153	4.48344	10.6709	4.59254	8.35912	8.3003				3.17611	10.1057	9.36316	8.87345	6.10278	7.68768				4.36045	4.13679	8.66943	7.59997	2.41187	6.00346
3.50874	5.07496	8.48531	2.64965	8.66329	2.04793				4.69584	3.2343	9.78828	6.82887	9.15279	3.10591				2.68414	2.30904	7.22258	5.03213	5.63339	6.82067
2.40696	6.92509	21.6996	2.66325	2.48378	7.85159				6.26483	5.55093	8.50112	10.1389	12.0597	4.30006				3.61476	5.76595	14.8087	7.29816	4.55502	8.91941
8.30798	4.65919	8.10807	4.22373	6.9126	2.33339				7.09907	5.82615	2.71327	9.28398	2.66567	4.84969				2.81756	4.09267	12.8499	11.2723	6.17372	8.36647
5.72455	9.9897	4.44893	6.90499	13.4931	2.09078				6.04124	3.65822	8.23948	5.22808	6.32867	8.62564				2.9593	4.373	4.79933	5.17089	21.1286	5.14026
5.91709	6.92147	1.83619	5.83235	8.38773	10.2376				1.64824	8.41671	11.8079	6.86646	2.18885	19.4566				3.1246	5.23616	6.11039	6.92612	5.81466	4.92539
4.60557	3.42951	10.0765	3.82399	3.38126	4.87345				3.25985	2.98957	3.81258	7.02327	13.6486	7.27117				5.17079	9.62295	15.423	5.11676	3.24067	8.47356
10.8786	4.01925	5.62418	6.12677	3.54998	2.58718				5.71732	6.31491	2.29818	7.93097	2.29166	12.8824				4.25461	13.7521	13.6606	4.9432	12.9726	5.46729
18.503	5.86623	5.2098	2.93407	5.9563	4.61674				12.3393	8.25024	8.66591	7.55567	4.71033	4.13274				5.65732	2.52085	18.856	11.9512	7.19582	2.57738
4.63384	6.06336	3.09384	1.69852	1.70914	2.65835				5.34102	6.89354	15.9447	7.84149	7.77622	9.26804				3.96214	9.33993	5.06275	4.31237	9.68019	8.96709
15.568	5.682	6.31518	2.34374	7.87081	8.2656				3.24706	22.1687	6.13551	7.87261	11.685	12.3546				2.70142	6.20637	15.6227	2.61078	9.82766	5.12799
5.72275	4.27183	6.28289	4.66684	4.08799	6.34291				3.26036	13.0368	10.035	1.978	11.1594	17.3653				3.31182	4.61178	5.30237	10.611	12.2207	4.63656
1.81065	8.46773	5.0988	7.60805	5.42933	4.46769				3.15315	6.77866	9.86285	1.96482	5.72665	18.2302				10.6267	4.33702	4.65802	3.44388	10.1775	1.47341
4.30882	3.62032	7.21393	7.49929	7.0955	5.21468				8.93585	5.33283	9.32673	13.874	5.72894	2.77496				7.93169	2.91477	5.16232	16.2797	5.9083	18.6539
3.46872	5.50544	3.40901	4.35974	13.0225	3.71518				7.45993	3.71659	9.56669	6.76625	8.44207	17.0829				5.606	3.49145	6.6597	9.82372	6.12662	8.85875
2.28352	2.42769	4.82893	5.23462	2.86912	7.22717				10.8507	8.96548	9.97262	3.45514	4.26125	6.16537				5.17642	5.38249	6.58851	3.13373	23.3707	11.0434
4.3936	6.13325	4.22662	10.6901	13.182	2.1828				4.09591	2.7528	13.4012	13.8605	4.72179	8.18763				12.5488	5.60135	5.76742	6.15877	6.92303	4.27728
5.52701	7.43997	5.61413	6.73355	5.09243	6.11065				3.34198	16.951	15.5487	6.40688	3.47366	11.2696				5.18097	6.4755	12.6301	6.22415	8.42907	4.3536
2.52028	2.02755	13.0143	3.1717	2.25858	9.07982				4.61938	17.0243	5.58059	4.15783	8.68451	9.61032				5.23199	6.24676	6.81634	3.73561	11.3245	2.47859
2.41326	3.37426	10.9606	5.13337	6.12174	5.40959				12.7334	3.24798	13.7384	10.7584	10.7047	11.3286				4.506	8.75861	5.66597	4.48213	13.4054	10.1149
6.85184	5.17744	3.8765	7.58415	2.92339	6.48024				7.54358	10.3957	6.32607	12.8755	9.55302	5.30929				1.08343	5.32446	6.25022	4.52699	5.03239	6.62773
1.92626	2.53211	4.10644	3.46798	4.4637	4.54922				7.53405	4.68958	5.76123	16.5038	4.51188	6.53975				3.9224	5.3585	3.14206	13.8549	4.82241	4.68707
3.85212	9.07904	7.82995	2.73839	4.27993	3.9194				4.34588	7.13325	6.21251	1.97828	9.33812	6.89396				3.39114	5.88195	4.09519	10.1997	2.93754	4.57264
1.89837	6.85494	13.7055	5.44411	3.56865	4.35373				8.50178	14.4867	9.38285	8.17296	8.8994	2.43929				6.08251	5.1415	3.75835	7.52915	9.74221	7.07719
5.45758	3.10993	4.46874	3.82439	5.44693	3.57821				6.7184	14.9831	14.6346	9.06386	5.2357	3.04255				2.21752	6.32617	3.67393	6.35339	12.4526	6.71885
12.0566	2.71264	8.17654	5.85763	4.28639	6.05842				5.56928	4.04686	11.5477	11.0264	2.49795	1.70315				4.33003	6.34276	5.93512	3.96094	30.6413	5.56538
2.87239	5.35821	4.01302	6.79011	3.21117	21.7284				6.39512	2.64714	14.8369	9.18088	3.59977	3.32052				4.22184	3.5737	9.56921	9.96339	8.35341	6.29317
1.63697	4.48947	6.14282	8.26768	3.47551	3.60466				7.96153	6.56184	14.3301	9.2547	4.92041	3.67308				6.80432	8.1984	5.01885	5.49876	14.0668	6.07791
1.35713	0.358645	6.23861	4.93709	6.32611	3.63214				4.91262	5.77841	14.0865	5.98147	5.56762	2.9437				4.10147	6.72445	15.3911	2.08462	1.71689	5.4417
3.92909	4.86338	18.2213	4.84254	3.83492	8.11534				11.6922	10.1128	10.5084	12.2751	2.87433	9.74565				2.91086	5.81495	4.76096	3.52918	0.747886	13.2129
3.40096	3.76657	2.00538	4.7166	3.21482	3.15132				7.98346	13.2992	7.06641	4.48777	7.9172	11.2453				3.20239	3.60985	24.1084	10.4548	7.58576	8.13946
2.67599	4.23076	5.70445	3.70668	3.3005	4.80787				3.2259	5.50015	4.4616	5.51946	3.08379	3.30474				1.1901	3.3935	4.07396	7.70142	8.97373	5.17762
4.57837	6.09313	10.0051	8.51941	5.97437	3.97778				2.98973	8.20141	2.1361	8.71094	4.10178	3.10882				4.63169	4.75317	9.90346	9.77577	25.7671	6.82872
4.56874	3.38818	4.29217	3.03741	3.52148	2.53763				9.14642	4.37657	3.20469	9.55771	9.19985	7.42037				1.73644	4.70751	5.82719	5.40743	14.2919	3.4282
2.55096	3.62784	3.06512	2.84511	3.4699	6.89839				7.4903	6.88146	4.23228	16.1881	5.00259	5.2514				3.39663	1.62466	4.00928	11.0323	11.2526	6.73637
13.6041	5.11225	2.86468	9.8587	3.66777	2.27417				12.6459	5.05248	22.0856	7.218	8.75201	4.05462				3.26478	4.3934	11.9491	13.8092	4.75154	3.79886
3.00689	3.64811	5.79061	2.45439	3.56435	3.53956				27.4646	4.50374	16.8004	5.10838	7.89496	9.23908				5.09755	4.0688	4.22797	6.77919	8.45828	7.51938
4.89578	3.04019	5.27787	7.97405	5.83224	2.60443				22.3799	6.26443	26.5701	2.75622	6.77611	3.00935				0.793227	8.11203	3.96124	9.17546	11.5095	2.69771
1.74736	3.71531	7.75118	8.36887	4.66767	6.03965				6.79267	16.019	5.19442	12.0055	11.2118	5.60223				11.0987	4.32637	10.568	8.25812	11.1452	10.7279
1.80513	12.6375	4.81754	19.8735	5.89597	8.83737				3.06994	7.11915	8.89772	6.98113	7.5646	6.03068				3.80791	6.19238	3.015	7.1294	28.469	5.67452
2.59821	3.40717	6.94751	7.06555	6.9749	7.26904				4.07415	8.79231	5.40585	9.87739	15.1026	7.9151				6.21755	6.51056	10.9754	8.98523	3.26117	12.444
2.88478	2.32783	8.72894	3.90092	6.77631	6.05487				3.7353	13.8081	7.20652	8.53594	9.89348	7.11383				2.24168	10.4491	1.68808	6.07453	2.04528	12.4424
7.27922	3.8728	31.8	4.17282	5.29335	6.67696				2.33442	11.0905	13.6231	3.61206	3.40001	25.7608				3.74863	4.70257	15.1227	7.65946	10.3784	7.99879
2.23041	4.05926	3.60575	5.77947	5.61345	4.02087				5.6608	4.06689	7.88584	11.4532	2.22435	13.6975				3.16095	5.80641	2.88631	11.1006	10.1649	5.29057
3.87067	6.78401	2.16165	1.39788	5.8348	4.76254				6.18713	3.46152	8.92187	5.99253	10.5719	17.0054				3.5475	7.44172	4.47901	9.61348	20.2468	3.16447
3.7631	5.59363	9.6418	1.22897	10.429	4.34699				3.06943	2.49293	13.528	3.56872	3.28048	4.83135				2.97647	3.70945	4.02179	4.60914	4.17581	3.20801
4.44234	5.85228	1.35224	5.23063	4.79015	0.972272				6.68288	5.09349	13.8371	3.00155	6.71621	8.62723				3.51577	2.37311	8.98884	6.99042	6.42036	7.68657
6.70081	3.47191	2.57739	14.5378	13.0815	4.50503				3.81172	13.03	8.54866	12.5708	18.741	6.27698				3.39738	5.16774	10.0869	4.86735	6.4355	2.22171
3.71022	6.19989	4.43034	7.84641	4.84295	3.43507				8.12008	6.61923	14.43	7.36706	7.90115	5.28776				4.51861	6.44584	10.3058	3.35683	5.2919	8.16662
3.79909	1.4438	4.65292	5.99249	10.4922	8.85093				7.07481	7.95272	4.25341	8.52751	10.9983	12.7231				2.63712	4.90744	2.50794	2.10907	9.15886	6.48802
3.03215	4.23148	4.98124	1.46907	2.72718	3.35446				3.58897	4.42846	8.5217	4.2283	4.34109	8.39604				2.44456	7.79833	3.76356	8.25111	4.95936	8.89097
2.44102	3.01697	5.64157	4.62734	4.15031	5.91116				6.37098	10.35	3.12679	8.50739	8.62826	5.27276				5.87009	6.27694	11.6287	4.49734	18.6716	6.11399
3.18349	7.41744	4.62885	3.99089	3.40621	6.55812				2.92423	1.70976	7.35932	8.39976	9.8788	9.60495				9.64663	1.92513	8.43848	4.1855	18.8053	4.21323
4.67503	1.79037	6.48241	5.86384	2.61333	5.32351				5.57017	6.36294	4.73459	3.99919	6.14123	2.34961				2.35769	4.34855	4.06124	2.07061	4.01216	4.71738
12.0258	10.8125	2.24693	5.4351	3.50366	3.98327				6.50986	12.2585	2.04676	3.15931	11.5279	10.753				2.65057	7.42243	3.91959	3.86049	14.1365	5.75397
3.9958	4.34267	4.33921	11.3923	9.70885	10.1592				4.64031	4.40052	6.50484	5.40819	6.66256	9.83259				2.11708	7.54421	4.43742	4.81653	5.01725	4.75142
2.63536	7.32894	15.3167	5.77992	1.51347	7.36892				9.9165	5.85687	9.72233	3.11907	5.40351	5.90603				3.53296	4.77246	12.9971	6.51352	6.28029	4.898
3.19546	3.15536	4.40304	3.06352	4.03438	5.38061				12.5228	5.30997	3.63309	13.008	3.97009	2.7232				3.76207	8.47981	9.37455	10.2497	5.64902	4.76547
6.82307	2.39597	7.74667	5.96726	3.43423	3.38218				2.46235	4.9285	8.68445	10.762	11.6676	7.47737				3.89109	12.1459	3.01389	6.21069	10.0891	6.17787
4.75009	2.78363	3.23658	1.94541	7.49769	2.51153				4.57277	4.59708	12.7197	11.3659	5.0375	3.62649				7.71854	2.04026	12.5612	9.32874	7.13266	8.17205
3.80281	4.15716	12.6483	4.68098	1.04967	4.85937				10.3005	2.4833	11.1413	5.3982	13.2996	9.08962				10.2664	5.32791	6.39498	4.125	17.0104	8.749
1.97345	7.29425	1.99258	7.32999	6.82294	4.97378				1.61652	5.80511	6.16344	9.45661	10.7279	1.37171				3.68274	6.89742	7.23585	6.00106	4.52562	5.68341
2.26417	13.7281	6.53221	5.1864	7.21782	9.44891				8.98505	10.6999	5.97373	26.0582	3.43043	7.53214				1.69904	2.00424	3.1618	8.60702	5.27093	4.0978
6.12162	4.89343	5.71029	5.78934	7.46804	2.75772				6.45823	10.7577	21.5658	7.7545	7.46329	5.08407				3.22384	5.88863	10.9041	15.6176	7.04744	5.94006
5.1453	18.9856	3.10603	2.97923	5.93411	3.12822				8.8576	3.57078	3.75814	6.41744	5.29722	4.80876				4.06882	2.04188	10.9816	5.16794	9.11955	4.58138
5.49291	1.10934	2.50398	5.15501	15.5342	1.97736				4.21155	5.45821	11.8077	12.6806	5.33449	5.15212				6.34306	15.5064	3.87605	7.90413	6.93508	15.1005
4.52957	3.13531	2.86075	2.64632	3.64695	3.69311				4.60119	4.77479	2.20807	3.60267	4.24695	12.3387				2.61614	4.00631	4.85529	7.26512	9.44453	5.73551
2.95329	7.63774	17.4398	5.50493	5.41708	3.39763				12.2542	5.57088	18.4896	6.04828	5.78161	1.99255				3.76492	6.35639	4.09461	12.5128	7.94896	3.13692
4.99997	4.73268	8.82447	3.99779	3.98937	1.55817				8.83695	10.7699	9.65471	4.76417	12.6533	2.45366				2.94763	4.63337	5.12978	8.21133	6.42226	6.94921
13.1445	3.89253	4.33571	3.82781	3.60949	2.92189				15.121	9.54127	8.94699	11.5179	7.1744	16.6337				4.53321	6.35561	6.66704	4.4145	3.98217	8.60611
3.86721	4.26233	5.74214	9.38253	5.78894	4.13281				5.85589	3.99777	4.18754	21.1137	3.76159	1.27806				4.32231	6.54975	3.74465	5.83753	7.51731	5.1682
4.36135	4.47335	4.79502	5.13855	7.82807	3.94475				3.47247	7.40735	2.07055	7.96933	12.6658	2.89589				3.62894	1.39902	3.35583	6.09727	13.2473	7.76635
6.64917	3.17971	3.54306	14.112	6.28315	5.73577				6.15598	6.07696	8.64837	4.65415	9.83148	20.0008				1.73137	5.10218	2.77686	4.66522	6.48156	3.67574
5.25629	4.0935	12.8398	6.1725	5.10632	6.04744				4.75586	7.55947	13.0038	9.47207	9.65765	11.6573				5.38809	18.7148	9.4121	2.69974	3.14444	6.99901
2.72959	2.69066	9.8688	10.6329	14.1725	5.8708				5.82929	6.8742	8.91415	7.88657	12.5086	11.5761				2.29685	7.32344	3.6075	3.83907	6.8073	6.59785
10.1799	2.98836	4.57346	4.07371	4.25141	3.80947				2.96256	3.13198	7.05684	6.33692	12.2643	9.19854				2.2144	5.60566	8.01041	5.73584	13.9091	4.89015
2.30864	5.66013	5.78862	2.15617	3.49765	5.89945				10.3071	2.40734	7.8927	5.18397	7.97527	4.31002				3.29934	2.94934	4.14628	7.97462	11.5903	7.46406
3.2726	8.51973	12.8628	1.32566	1.67079	5.55197				15.2058	23.2941	11.6388	4.25531	2.09606	4.05059				6.16382	6.53158	3.08264	6.62494	4.1229	4.64325
4.96826	4.92442	2.97736	7.34115	2.60626	7.51785				12.7762	3.77158	5.43595	6.04363	9.28802	4.01162				3.69511	6.53532	3.47503	10.9918	4.37031	7.81439
9.15026	2.22434	4.44705	10.2596	1.35008	1.76085				5.10249	11.3465	11.7411	11.6429	5.70733	7.74536				3.85715	3.38534	3.88609	7.22869	3.23856	4.46925
3.12344	6.81063	5.04415	9.04449	25.8491	4.49137				5.01133	5.63408	3.46261	3.1606	8.90454	4.32471				3.15499	3.42156	11.3584	6.0299	8.51486	4.51453
6.6723	4.27704	3.32364	8.14339	4.55162	4.25883				4.33268	4.47712	7.97313	4.13159	7.23426	2.5215				5.3174	4.24203	11.2987	10.5447	11.1844	6.35627
2.83529	4.7288	4.1911	7.80695	7.15081	5.20086				8.34804	10.909	6.67814	4.49507	12.4687	11.2524				6.70827	4.49082	5.6242	8.19006	26.0721	1.39332
5.4199	2.81621	3.78656	4.08616	3.54762	4.65143				10.1119	6.70998	7.6281	8.43175	4.12706	4.10794				2.55924	2.58418	4.7321	5.1566	4.85123	13.4467
3.35586	2.74688	8.36949	4.11782	3.73068	8.70266				6.5747	5.68173	6.84061	15.6625	5.35222	4.44953				5.20084	5.50263	3.63574	17.4008	8.4818	5.36913
3.72693	3.5949	6.05357	3.93651	7.66924	6.68136				4.96753	8.4048	8.19612	8.32411	4.41047	9.87943				6.65838	3.32132	6.92552	8.94654	10.066	13.2243
3.96703	5.43046	8.62523	3.37927	10.3176	3.26113				13.4226	4.33046	9.73792	2.12213	4.20987	7.63102				1.47509	3.42955	9.93808	6.91829	6.68949	3.83773
2.01306	6.29655	4.03391	2.78925	11.86	5.26147				3.41126	6.16746	8.30692	11.6819	23.3906	4.07307				1.76691	4.67792	3.77466	11.9218	5.40177	6.26204
1.89803	5.16827	4.30853	7.1144	5.01454	1.59143				2.99026	4.70507	4.57882	13.5012	16.9184	13.5129				2.98736	8.73901	12.286	4.9777	14.1744	9.52783
1.99392	2.88481	5.78834	6.53079	3.70162	5.33133				4.10497	9.07036	12.1222	12.2706	7.23586	5.23085				3.71231	2.7762	5.62371	3.39179	5.66131	1.53356
3.76305	7.29971	9.20889	6.02166	14.6018	4.65235				16.2499	8.42573	8.83194	4.4776	23.1402	7.6514				3.7162	2.62434	2.40187	17.8761	4.75991	4.67635
7.5028	1.1871	10.0834	3.82105	4.04396	5.45597				6.43284	6.16894	11.123	3.36809	7.32792	27.7322				3.17486	9.47005	3.28222	4.97971	9.78808	2.03509
3.29271	1.11672	3.33689	2.51419	1.9773	3.47044				10.0548	13.1511	9.11175	9.81177	0.563165	17.8823				2.60117	4.59762	4.05005	8.42493	10.4055	4.6363
2.50591	0.585031	3.63999	6.17057	6.9351	5.23799				7.05258	8.01484	40.7469	9.6227	7.13568	3.5477				2.9017	4.28577	9.06354	6.31824	6.63712	6.15649
4.24229	1.79476	4.29528	6.28917	2.61209	5.20611				9.88491	8.86022	2.93388	2.64387	7.83272	21.4847				2.92867	4.19702	6.04696	3.86946	2.35217	5.93081
3.91055	3.53542	10.8006	4.52201	2.37566	5.78448				6.149	1.61421	8.67951	5.54695	8.34508	14.3779				5.64621	5.7526	4.60327	4.8922	4.77044	11.1465
3.57842	2.1119	3.12504	7.58544	2.45782	5.27804				6.76142	18.8989	12.7663	2.32192	2.96904	30.4469				5.9858	8.33996	4.3229	10.4745	4.86319	4.86377
15.0219	5.36677	3.91017	2.91626	11.194	7.4677				3.26206	4.65096	10.8069	7.61441	12.0613	7.97471				4.60179	8.69342	2.46237	2.65143	3.70582	4.23876
1.57945	3.57501	4.76403	4.91966	5.80841	5.59922				11.8765	6.79205	17.3074	2.41767	9.74473	2.0993				1.95834	6.97045	2.16665	8.38756	4.55518	6.93189
10.7483	3.70646	5.03342	4.82058	10.0569	4.43271				2.81508	5.4593	6.02805	6.20417	2.52748	6.35813				3.53318	3.52851	6.21775	7.27994	16.7532	3.83329
1.45356	4.69337	3.96167	4.2275	5.50941	7.39126				13.4613	6.87714	4.07753	5.43942	17.3964	5.9211				2.9403	3.48183	6.73015	5.91966	3.67185	7.90087
4.25137	3.10829	5.08601	3.90497	11.5149	3.63031				5.97888	5.42958	5.18318	9.65399	5.97349	15.5385				1.69874	2.09284	7.70926	4.6428	4.35231	8.5242
2.93606	3.30949	7.23492	7.41157	3.67978	2.29657				4.07357	7.68202	5.66331	7.43285	2.62618	2.49826				1.45808	5.41606	20.5906	18.0287	5.24493	12.1802
11.7383	8.36628	3.12075	4.55109	7.26021	4.75465				3.85059	7.10008	10.122	3.93204	16.7398	2.6253				22.4017	6.46333	6.97131	3.04704	5.63597	5.14369
2.40943	6.85697	6.76856	6.46851	11.0821	9.58411				7.22518	4.74372	21.9114	3.65286	21.3749	4.82661				2.49757	4.08247	5.39995	3.90467	11.4719	3.37637
2.31861	8.29802	2.16013	4.09229	6.08862	4.3367				6.50806	3.83182	9.01718	5.63313	10.8114	8.32818				3.83551	4.67412	3.40065	4.94617	6.38449	2.49321
2.34877	4.27883	8.71299	8.01518	10.5578	12.3844				13.9436	10.4751	8.71421	10.0396	4.04277	9.47925				2.78045	2.21521	2.99329	7.2709	7.72851	5.16299
3.13636	3.07927	3.75715	11.7174	15.2328	11.683				10.7425	5.3175	8.84915	7.00832	11.4611	5.33984				3.39451	3.12019	4.93268	8.43674	7.63431	8.09175
4.90167	2.59987	9.47835	5.26896	5.44906	3.99466				10.772	4.18794	12.7752	12.374	7.65983	6.12				2.85276	3.40967	1.1966	4.10856	6.95244	9.53608
5.97846	5.99686	2.92774	6.24993	7.74261	4.67934				9.3823	5.27028	8.71249	12.7208	4.12493	5.33681				3.09453	5.34622	14.7808	21.3784	4.96003	5.1588
5.77263	0.537674	3.85051	5.76499	11.3107	4.80025				5.03421	5.37392	3.25579	9.64323	4.47624	10.6612				3.60175	3.51954	3.27706	4.11834	6.59586	7.70503
6.7928	3.92114	3.72296	5.19505	4.14455	6.39664				7.97369	2.46366	7.78609	6.92921	3.83662	4.26838				1.99994	5.56597	3.44109	4.81368	9.02236	2.39311
4.62985	10.8143	1.72888	5.11138	3.84945	4.32808				4.63284	8.61171	8.28383	10.9045	11.7173	11.9081				10.6851	5.12378	12.4488	12.0063	5.04652	5.93895
5.97677	9.42076	4.64412	6.8115	3.00748	7.41385				7.98938	7.409	12.2653	4.22131	4.23711	7.43322				4.80292	6.32223	11.2756	4.97177	10.4125	25.6074
3.5447	3.4724	3.95443	6.31424	2.09193	3.64438				4.20319	8.9403	9.32715	6.2633	3.00656	7.68771				3.52356	8.47901	7.52546	5.17074	5.14699	3.51855
3.26367	8.00851	5.54699	7.07534	1.67462	4.29705				4.69508	3.26491	7.38077	3.14779	1.57613	6.72346				1.68862	4.01964	9.77004	13.0786	2.87575	4.20656
9.0643	6.16224	4.31568	2.84592	7.45047	8.13466				6.76221	4.30318	2.40253	4.21211	9.37778	8.3824				1.03538	3.33616	12.4295	4.65229	3.5047	8.75422
3.68229	5.59302	3.89398	4.9007	13.4909	7.30265				6.65858	4.65617	15.062	5.06036	9.20307	6.14266				2.98625	4.79028	8.04795	3.83943	8.56755	10.9074
3.18323	2.37718	3.50006	2.05647	0.62085	6.07733				4.15181	24.7952	13.2745	11.6442	7.40525	16.5574				1.69885	5.97096	5.60697	12.199	24.3635	4.96235
3.75234	5.27767	6.75385	3.04581	5.0179	7.89281				1.25189	4.2737	17.5195	2.80204	4.89945	10.1301				13.4424	8.22558	7.34121	4.31574	12.9969	7.25907
13.0703	5.1093	9.99748	9.96662	3.601	4.44201				1.33913	8.90163	16.3525	10.7729	4.82425	4.95672				16.7291	8.29211	5.81429	9.2348	25.7124	21.0331
2.12354	3.20605	3.85855	2.89569	7.67634	2.95317				12.9767	9.43203	11.8181	4.29341	22.3568	15.0347				2.15173	5.11415	4.48501	7.00351	4.41018	7.50673
1.47776	4.63193	3.49846	7.71785	4.22528	5.9687				4.68405	29.4575	9.6215	5.22517	3.37082	19.9462				4.85386	5.38958	6.82532	1.53634	11.5659	2.48934
4.27302	3.29578	5.45923	4.29356	4.47648	3.30788				8.5006	6.86947	6.38077	5.98415	9.99343	7.62545				3.20728	9.15774	11.5731	18.6489	6.76968	3.38156
6.99528	3.54543	6.38548	5.59142	4.57814	3.77543				5.19443	6.47855	10.0904	5.99354	10.2562	4.36549				4.6556	1.94564	6.55051	10.2343	5.04275	2.2176
4.56675	5.21161	10.0573	5.31997	5.4702	0.843656				7.32711	15.231	3.75344	10.3789	9.72498	5.65935				4.39927	3.21277	5.07595	9.61866	14.714	3.15776
4.2396	5.84907	11.1571	6.18933	3.68829	5.11341				4.64699	20.6076	4.1489	7.35559	9.88585	6.5632				2.30685	6.30185	7.55273	2.01747	6.40833	7.69276
4.74116	4.69473	2.19567	5.02582	2.72194	3.16345				8.76158	6.4366	6.92564	6.22129	8.60599	4.546				5.44088	9.64114	2.56051	5.3989	4.8614	4.62974
4.67616	4.81949	3.75783	4.39171	5.91236	9.20391				4.34567	3.53744	6.54802	16.8421	4.25513	8.51078				4.77998	6.13017	6.16627	3.87627	4.59044	3.31476
4.18501	4.63338	5.42304	4.30044	4.54071	3.83692				6.90601	6.55576	9.82788	6.43666	10.9972	8.12412				4.60661	4.86963	6.22725	5.37322	6.53077	3.98677
7.59913	3.42539	3.30863	5.94089	3.68426	2.02171				6.39446	33.5904	11.9452	7.95659	4.17219	13.0695				3.31538	5.24781	5.84117	5.32188	15.6791	4.70287
4.06517	3.7143	4.22871	9.37478	6.74874	6.67578				2.98624	8.41584	8.89666	2.16937	2.90986	20.962				4.30702	1.61626	6.97299	11.626	16.4802	6.40683
9.96209	3.74692	4.63483	8.87763	3.27179	4.66904				5.11668	15.9633	10.1711	2.86893	6.07218	4.07978				3.10741	2.95789	6.4536	5.80137	4.86157	6.5578
4.57002	3.99945	2.42178	4.28435	2.63902	3.96079				4.31156	7.86463	9.0017	2.81634	3.46582	8.11058				3.27808	11.5039	6.62599	4.43437	9.14209	7.84365
4.69023	3.47103	1.96615	7.14394	8.56501	6.28918				2.45964	6.00489	7.9272	6.03765	4.15315	15.1071				5.07786	4.99066	7.67776	11.4658	6.72044	5.43733
2.81888	8.06667	2.58339	4.42961	16.5673	4.34147				2.64937	9.11609	6.26032	6.38396	4.9317	9.86894				1.6022	7.14628	2.97645	6.09992	7.56554	4.89571
3.93137	4.20946	4.73192	4.27012	3.02583	2.26804				9.99528	5.28393	3.39501	2.90932	2.49636	14.1536				1.27307	8.07314	7.46757	20.1158	10.3269	9.78315
9.45337	10.2228	5.49345	3.98633	2.16215	3.78359				11.4845	8.52945	3.97287	19.6386	4.12911	20.3448				9.53799	4.59346	5.29899	10.6131	4.71665	2.9104
3.78623	2.45758	4.81434	6.0774	1.23772	17.7067				10.6364	5.95841	19.3674	2.48754	4.31045	5.43404				3.4738	4.98203	7.0587	6.11732	9.26219	4.06787
4.87839	4.38912	6.54683	5.58942	1.39963	3.24304				9.40191	9.13477	13.7966	4.61143	9.03512	5.03067				4.39886	3.96386	4.09447	6.93514	20.6719	5.0391
2.38911	6.27411	3.53426	5.6597	5.08018	7.37016				4.27515	4.65157	7.12045	5.97353	3.68501	4.19178				3.48337	4.68478	3.55671	11.4077	5.14323	6.33081
4.17883	5.11328	4.45686	2.77454	6.69677	3.47062				4.51167	17.7109	7.78796	3.15706	8.8774	4.72189				3.65292	8.47671	3.28867	1.29225	10.9083	4.98431
2.44203	11.3234	4.54535	9.67351	4.68771	2.74394				4.19967	6.53922	7.63982	10.0212	6.4366	9.61666				2.85572	6.03828	8.5904	7.40323	6.67001	3.48591
3.55539	2.56772	15.0787	2.94321	3.69573	3.23594				8.71798	11.98	8.81312	4.66156	13.4937	2.16417				2.87687	4.23397	14.1841	6.2908	3.81406	6.27179
4.01252	12.6908	4.88625	4.26957	4.7229	3.58767				7.80563	6.10484	1.76691	3.08225	9.83927	8.29153				5.13504	4.15511	18.0403	3.54365	6.96035	5.26251
7.88008	4.92787	3.40834	8.40184	3.91446	1.80482				5.24279	4.45797	13.6126	4.44256	8.15163	6.07527				3.30727	5.09634	4.68291	3.59206	12.8276	9.54221
1.54575	4.77607	9.28259	7.40921	10.8432	3.66794				4.60161	6.6632	11.357	9.47042	7.86415	5.79909				2.22903	2.09252	21.3032	3.50355	4.9472	3.39179
5.54335	5.67819	3.77522	6.74324	4.54899	3.21391				9.91131	6.41131	21.5829	8.36258	7.93853	4.94923				3.85177	7.58457	3.62788	8.29012	12.8163	11.4272
2.80935	3.35199	4.37195	3.93307	2.56015	4.41998				3.99257	6.63803	3.70698	6.87711	5.4005	8.96895				2.10589	5.38073	3.7022	5.76402	7.5618	3.59227
8.14502	5.48605	4.36086	6.00907	2.65074	5.03288				7.1252	10.8656	10.2908	3.62895	5.06032	2.99314				0.892473	2.76494	6.17389	5.56609	6.15212	4.42186
4.89908	5.96469	6.80022	5.28808	6.35437	3.90887				5.20588	2.14257	10.5593	2.99521	5.29017	6.67689				5.79667	8.8901	9.56339	6.13312	5.70376	3.76378
3.83127	4.30793	2.27003	7.52418	2.83434	3.09843				14.2924	15.2624	8.49844	15.0527	15.4951	3.23403				4.63794	23.25	5.22375	5.06727	3.63713	8.44116
5.9753	4.84204	7.58508	9.54626	3.88423	4.10391				2.09788	2.09333	4.08922	5.89446	6.50126	3.75439				3.73909	11.0181	4.76043	2.16092	6.25341	14.8215
6.36751	3.99113	5.73656	7.25393	8.09484	3.17075				8.64076	5.40756	5.94804	9.34026	6.9078	11.6152				2.23546	4.5704	9.85118	7.43932	3.24865	0.936581
6.42648	4.0396	6.59118	4.40255	7.05731	10.3312				2.57896	8.22622	5.784	7.77027	3.37589	4.37974				2.50767	4.39212	4.85512	12.872	12.2444	6.37972
3.26842	3.87884	4.48699	6.23923	5.44731	3.13469				3.48463	3.76649	8.00201	20.1423	2.15221	9.86886				7.02787	8.12395	5.20504	4.29116	3.56011	7.76272
12.3357	3.94382	7.59537	4.844	6.97219	5.82015				6.24531	4.74166	9.32986	1.017	3.01295	2.06126				4.04408	5.71439	4.08648	4.39013	10.2816	8.58943
26.8094	4.50237	9.25878	3.45132	4.19588	5.18195				4.57634	8.81108	12.6862	3.41823	8.84612	7.17033				2.87226	6.01587	3.08948	6.06309	15.7845	9.08133
2.37412	6.36404	6.01046	10.2105	5.21789	4.96945				13.5536	6.6743	3.70983	8.45919	4.13395	10.9258				4.00043	5.17626	2.84705	6.44738	8.9383	12.5074
1.89534	3.90869	4.0005	2.94986	5.29763	5.66647				5.68139	12.8923	14.2597	6.72609	17.7226	4.16744				3.21779	6.26965	4.85359	10.6593	6.44571	5.13527
12.1923	2.97904	3.33464	4.67765	5.29425	3.51517				3.73668	15.1279	3.78695	9.17783	8.25899	3.42445				1.88528	6.39188	12.5234	9.43505	11.052	5.6126
2.12858	3.43686	3.97597	7.8385	3.97669	7.14186				8.72286	4.95416	7.87874	6.40049	6.10922	9.0892				3.1316	5.02938	10.9654	6.72506	2.92316	5.63172
8.9147	2.68661	5.07477	4.48541	3.18492	4.09704				7.42213	3.07682	22.5581	8.42034	3.16754	7.08365				2.32925	2.70222	6.8233	6.19216	8.82339	2.50407
15.6132	4.50191	3.62218	4.34716	6.70185	3.41263				6.34665	1.37452	0.880373	9.04495	9.50387	10.7668				4.23048	2.43149	5.11601	5.75389	4.69182	19.8355
5.47574	6.58372	3.28373	8.30519	5.05531	2.87679				1.67988	2.56467	22.5222	10.5087	15.2453	0.938129				5.53188	10.4028	4.04081	3.82889	8.20334	2.52475
5.35841	4.15731	2.1324	5.29094	6.48738	2.60858				6.81653	5.08184	15.3901	11.933	4.6311	3.70168				3.70056	4.65316	2.74942	4.67215	3.03421	2.29269
1.76834	4.96116	4.98628	4.7594	9.58977	7.58539				5.54162	1.74717	14.6474	6.22787	10.8367	7.31222				2.94472	7.28235	3.28269	13.1655	3.65562	2.1332
3.5904	5.50169	4.11258	2.88226	5.40721	11.8337				5.41021	10.4894	4.17552	3.31951	6.82432	5.23698				3.03677	4.0303	6.1082	9.84563	5.95312	9.46373
14.656	5.45529	4.72991	7.99787	3.98391	16.0473				21.0236	10.0553	24.2239	14.0344	5.95941	6.8564				10.8687	3.87336	12.7089	8.87136	3.8459	2.34891
9.83471	4.8049	7.29117	3.3884	4.06922	3.09241				5.7195	6.81357	4.20418	8.62891	9.63407	6.434				1.96105	5.66405	2.66418	3.21472	2.06379	2.59796
2.16518	1.95315	8.12268	2.29918	2.27982	10.2148				8.20017	10.5582	10.5413	6.15252	10.8328	3.04952				3.1467	7.21947	5.56273	2.89039	6.28192	11.4468
5.4798	2.70358	7.01123	4.28997	9.45979	4.15933				4.9875	5.2657	5.76291	4.02443	5.16143	5.17741				3.20542	11.707	14.7058	5.86109	5.28589	5.06305
5.36864	4.8028	2.08908	3.96106	3.54721	3.73634				2.39269	6.01883	4.294	11.5049	4.58269	5.04037				5.45325	3.37395	23.1049	3.75338	14.9088	6.0807
4.0063	4.0439	12.8445	6.22821	5.94734	2.82669				4.91912	13.9058	20.9181	6.24904	11.4402	8.09833				5.14089	2.11677	5.50726	4.46727	8.18303	3.61811
6.40936	7.96419	7.1186	2.6635	2.26394	4.39692				4.68893	7.11634	6.66186	2.76552	7.19332	11.7299				2.38516	6.21567	8.54413	7.60554	17.1066	6.5837
3.10106	3.83467	2.55152	3.7956	4.32087	4.7472				5.49986	5.68392	10.1081	9.09757	8.49527	5.07125				10.9102	9.61775	4.69485	5.12095	9.87706	11.2567
3.83089	7.28089	5.88993	4.73035	2.56326	3.07168				3.87843	6.9933	5.84928	6.36528	4.99415	10.958				2.73026	3.22857	7.34951	7.40543	8.74792	5.42455
15.2191	7.37165	2.81963	5.09651	4.09988	5.53951				3.26188	10.0751	7.75706	11.13	7.34178	4.88358				7.32751	3.12295	8.08437	3.60186	3.61943	7.13906
3.21647	4.14532	8.04097	5.27979	3.83718	4.72385				5.73954	9.18776	18.6639	10.9485	9.19864	5.03486				2.75409	5.63165	6.749	7.65023	9.77313	6.83413
3.24202	4.4158	2.88035	5.54704	3.64868	6.18461				2.67417	4.47044	5.42729	4.78215	6.85583	9.47933				2.12977	5.1475	3.80969	6.90394	8.62696	6.63415
3.63328	4.68688	3.17106	4.46945	2.91237	9.66281				3.57901	8.57241	15.1009	3.96295	11.5173	2.74294				3.49897	2.72177	6.92638	8.53157	7.26549	5.75492
2.0664	5.94175	8.41065	5.19094	6.91769	7.57901				8.65282	13.7686	17.3733	3.7317	18.1188	7.59782				8.72952	3.7051	4.62049	7.79279	5.27991	4.77467
3.95585	3.82373	4.94662	5.54994	13.2484	11.6422				2.42606	4.24663	12.9168	5.03763	6.64751	8.78275				2.8295	4.49254	8.24763	4.12237	11.8129	3.67172
3.03133	3.39921	9.56217	5.19454	0.906062	11.0352				12.2651	3.28347	16.2981	9.5773	9.12865	11.7244				2.37797	4.73788	6.50437	8.63862	2.11595	10.2989
1.982	3.28672	7.02824	4.41431	7.40404	3.92355				7.77238	5.10795	21.1239	7.733	7.76883	6.15132				3.47553	4.67059	6.96469	4.39799	4.56244	5.14569
4.98167	4.90968	2.73854	5.38965	31.4672	1.94686				5.92246	6.91984	7.23395	2.76259	22.8557	2.24141				1.43598	11.3792	6.2449	1.72804	12.7665	2.83334
3.41681	5.44504	8.00493	4.90492	16.8369	2.6734				11.1433	5.61756	12.5244	2.20253	13.9896	7.90362				9.92187	12.2648	5.56263	3.84625	6.9602	5.97282
2.98048	5.4876	7.14026	3.12484	16.2058	5.94479				4.51084	9.90103	1.60668	5.39559	6.09488	11.867				3.66928	8.37216	5.85229	4.15838	17.8402	6.90269
3.53176	4.37914	7.19746	1.40289	12.7369	4.17217				9.96675	6.07893	4.29082	11.3232	17.1666	10.4608				3.97433	5.12714	8.97959	6.45616	3.95698	22.7277
2.99981	7.4805	6.12402	2.19144	3.46687	4.20407				2.96719	3.86727	4.15654	7.19087	6.2448	7.00015				5.72968	2.94612	7.95931	4.58937	21.0258	3.12904
9.47576	5.56077	9.97069	5.13705	5.88961	6.43653				9.15472	10.0215	3.15214	3.90468	8.79125	4.82				3.15141	2.19857	6.59262	2.1367	14.6742	7.06891
2.25739	4.16708	6.90461	4.10099	8.10153	3.05967				6.95603	6.4655	5.88722	3.45793	9.20111	4.53907				2.73076	6.36443	9.90949	6.20985	9.1206	11.3255
3.1087	4.7725	5.43001	4.37351	4.64861	5.06199				4.73487	5.07269	2.79868	9.96653	5.52824	3.26642				2.27777	5.52144	4.3906	2.9249	11.0127	3.67021
3.02886	3.68746	6.93043	4.68467	3.42738	7.86545				4.98303	10.2814	4.83363	4.44932	4.44797	1.85342				5.46464	1.57133	6.2789	6.3389	7.15611	5.40661
3.1473	3.69451	7.55091	6.84075	3.1853	4.65793				1.37508	3.93864	21.9251	8.02603	6.0605	9.59264				4.92897	2.65021	7.81395	3.65784	9.50048	4.12621
3.47719	3.34158	8.01163	5.31608	4.86006	6.04044				14.7895	5.25568	6.74026	4.6534	7.12106	8.07693				6.10871	5.82928	5.442	4.14965	7.36324	13.6903
1.10869	6.06832	1.74165	4.5232	5.09911	6.50768				6.55842	6.30656	6.68045	1.43568	4.91959	13.6332				5.09324	2.02303	8.20983	7.46799	13.433	4.3079
1.60917	4.12048	2.04827	6.25785	2.53313	2.98867				3.17652	4.38766	9.48591	0.775355	15.078	4.86489				12.8279	5.83752	3.86781	15.8451	22.7842	3.8323
3.52383	4.92894	5.87077	25.7435	4.45768	6.45203				4.0712	7.018	5.15014	20.5652	7.15232	1.59145				1.54082	4.25151	14.0084	17.0584	13.6415	3.84721
5.77827	4.18747	4.69537	4.58973	6.06378	4.81216				3.80755	4.49256	6.60615	7.15198	15.2945	21.1098				4.56192	8.18447	4.58382	2.90056	5.13992	3.60587
3.41869	5.06417	7.36361	1.3269	6.09344	3.86511				8.74004	5.39798	9.95381	6.94794	2.2105	7.78689				3.33192	5.84461	9.21837	5.78907	4.637	7.45319
2.93749	6.77195	3.49742	8.31571	5.04913	0.899168				5.22896	14.0528	8.92723	7.24563	1.89382	5.70824				13.9985	25.1367	4.94062	4.05803	9.21234	10.3778
10.3123	4.03716	4.84563	6.12964	2.98814	4.61791				6.0524	4.62415	14.1314	4.54765	4.23168	9.63174				3.05447	4.86894	3.0108	4.94557	14.3628	7.94341
2.3017	4.57437	7.18726	3.20708	10.1716	3.58728				5.09882	2.65493	8.08641	5.2299	7.23522	6.20077				6.40152	4.13149	4.35569	12.7281	17.283	7.44613
6.21156	3.69368	3.86409	5.962	11.903	15.4714				9.34006	7.92151	12.2111	6.31057	4.10659	5.82281				2.95239	4.45521	15.0713	3.00222	5.3731	11.3897
6.09877	8.23281	7.07199	7.38127	6.16494	3.77937				8.57169	5.12844	6.56283	6.52978	2.33655	4.0243				2.64766	5.16226	13.4375	10.2254	2.87254	15.3072
5.47595	5.42402	12.7125	5.83834	4.7768	3.62325				5.25724	4.55753	4.32706	9.88177	8.72878	4.18859				2.21868	3.68994	3.2518	10.8967	5.03726	1.98772
6.6742	4.05358	6.20968	5.79662	5.4767	5.17285				11.879	12.8166	8.36721	4.94776	7.56717	6.86266				5.83663	5.54883	3.57476	2.5726	9.11441	6.91674
3.77681	2.9438	4.08449	5.85055	3.0959	4.57864				8.26926	4.90218	0.998092	6.60261	6.09781	6.9071				4.58435	5.18797	8.47542	8.12694	9.01548	6.81798
4.26061	6.66806	7.15869	6.65174	6.19865	3.03731				5.65855	4.63758	6.79056	6.20781	10.6253	6.18585				3.53921	4.65866	11.8791	15.204	2.64927	5.17283
4.47115	3.93747	5.01005	9.9501	5.95657	4.2123				7.22321	4.68749	7.73836	4.17542	12.5533	12.998				6.14165	4.63843	4.54181	5.04495	5.67198	8.35089
2.74351	5.1004	5.91113	4.91857	6.69182	3.5577				1.78278	6.53678	6.3226	5.36896	5.95228	7.72063				10.9463	4.79772	7.56964	4.84762	12.9486	8.10859
4.09001	5.39101	8.92576	6.04535	2.89741	7.41913				5.79422	16.2922	13.8699	19.8316	7.52052	10.8938				1.39308	3.74343	4.93085	4.80244	4.81343	10.0381
4.77198	2.45365	10.9869	4.53752	5.29897	3.2569				12.5835	2.54474	11.1442	9.41785	7.64637	5.68357				4.64402	6.0951	5.2209	8.26891	7.43694	7.26893
3.4985	3.77504	10.0527	3.65904	4.76093	1.76153				4.74886	5.15592	9.69764	4.60132	5.64667	6.81103				2.20861	6.56071	6.6965	6.41351	13.3617	4.07538
4.35478	3.51983	2.92714	5.07201	6.44491	4.50779				11.8856	9.19276	12.1383	4.2161	3.20987	9.28805				2.25722	9.93323	8.59809	6.19797	14.4826	6.13427
6.14204	2.19297	3.3923	2.01736	3.19444	7.28239				5.6097	22.1703	6.40634	10.0503	8.83636	8.13373				2.47891	6.84786	5.62542	13.8219	4.15066	6.84886
16.6593	6.48795	7.93891	5.36385	7.34524	5.77371				7.00828	10.8242	4.01692	6.08256	10.4391	5.14665				4.54517	7.15646	3.39769	6.31347	3.67435	2.5416
3.46615	2.90265	4.79596	7.01924	5.178	8.23546				7.54666	10.1242	5.28039	5.90527	2.88539	2.75128				2.85729	3.61668	9.50835	5.6282	8.74549	6.07817
4.00034	7.3645	5.32661	3.45184	2.16255	4.47776				14.9995	11.1289	12.6712	5.29829	3.05782	8.3855				3.83932	11.6188	3.87984	17.0456	13.6095	4.21161
4.23102	4.42794	4.92937	4.57291	3.85691	8.28374				8.11276	5.90155	6.93889	12.103	5.63434	10.8166				1.58054	3.57063	6.80873	17.5711	11.255	2.04408
3.14654	2.9161	1.24183	5.93283	6.96402	5.29727				6.25877	22.0931	4.65872	8.85711	9.5067	6.69314				4.18344	13.7816	4.24954	6.20188	3.35137	6.96494
3.81385	4.47875	3.86586	4.22391	10.0505	25.1972				25.8166	5.02981	3.95504	4.53545	8.45436	7.53242				6.19322	6.30298	9.95202	3.31172	22.6285	11.0876
5.07988	3.81993	5.93689	3.12789	5.80644	9.95186				8.8509	2.19938	2.51385	6.73675	8.54761	6.02964				4.16615	5.53235	5.42918	12.7582	6.99357	5.1617
2.40934	6.39631	7.18356	6.10202	3.67921	5.30647				2.10154	4.66315	10.391	10.7754	4.40674	13.096				3.28233	6.72719	6.42335	6.91051	2.3694	3.57256
6.31014	5.63012	3.79394	10.3277	3.47385	2.52207				4.64833	4.65614	17.0992	9.806	10.2574	8.06453				4.76747	5.70042	7.57782	4.2396	6.84942	4.01445
4.09052	4.11968	9.80656	3.92801	2.21136	5.3312				6.23723	9.38383	6.32808	13.0609	12.3892	12.6782				3.16432	4.51397	32.0185	4.3349	6.67279	6.59276
3.05771	6.20679	1.49334	5.78483	2.47002	3.32796				6.5874	5.16849	8.55974	3.64978	4.52271	8.30699				4.11124	6.66029	4.45338	5.70805	8.79903	2.80695
3.54526	4.44695	3.91024	6.15272	14.0425	2.96686				6.71704	7.14062	3.8345	13.1262	2.94252	9.48042				2.3064	7.87176	4.81455	20.7332	6.65333	12.3158
1.62761	6.91963	5.76123	3.78941	2.95548	5.64798				7.70142	9.7445	11.4724	4.77207	1.39144	5.20964				3.45012	5.09851	6.03055	9.59991	8.8107	4.4554
0.772705	2.60909	3.45601	4.51032	3.51883	2.70721				4.42166	7.41526	7.99865	11.4424	4.13627	6.07555				11.928	6.51694	7.83832	1.83912	5.2264	2.39839
8.31867	4.4487	4.4317	6.83629	3.46839	3.32613				9.27532	15.2175	6.82193	14.266	23.0663	4.59234				3.10958	14.6613	7.32924	7.94107	9.01008	4.12869
4.7462	5.05761	4.6042	2.8634	6.95283	5.33177				4.36315	3.60469	5.09125	4.32641	12.5167	8.7032				5.61695	6.63784	6.19676	12.3303	7.97592	5.30218
6.56355	4.46685	4.57423	7.23429	4.6124	3.0174				2.50768	5.59889	3.91711	7.1178	5.01813	4.63146				2.05737	2.4116	4.44933	5.82753	19.0955	8.32928
4.03155	4.12606	3.34291	4.3263	5.74881	3.68734				7.90088	2.56124	3.49656	4.65676	5.28817	11.2682				1.8543	29.2952	7.03795	3.83548	8.08467	5.98516
3.21699	2.94408	4.76334	2.87531	10.2133	1.97428				4.56571	3.57932	10.6757	3.69439	5.12764	10.6666				3.38705	15.1304	11.8122	9.47635	12.6388	4.74515
2.62924	6.53971	5.47454	3.47738	6.05112	2.23396				29.8086	5.01566	17.8287	2.73635	10.9934	7.67402				2.07709	1.69881	3.62816	3.48344	14.9709	4.91105
9.95462	2.00291	5.61817	8.34963	2.09117	1.9701				13.733	15.0621	8.60983	7.80797	6.18534	6.55883				4.4682	3.65477	6.03745	10.2968	10.3618	7.4171
2.00486	2.04249	7.15607	3.90345	5.25094	4.08017				4.81856	5.22872	7.70836	12.0419	5.29463	24.2161				4.93923	5.12642	3.01457	8.02734	5.59304	10.7014
2.8098	3.62923	4.24153	7.35047	8.07442	6.48927				7.98223	9.24464	4.51025	5.84761	4.27228	9.35729				3.34825	4.56897	3.60939	8.96663	18.5041	7.72505
14.9847	4.12936	2.18617	5.67405	18.8532	3.02727				2.42773	39.2963	13.0733	3.15872	4.31111	2.39898				2.67856	4.87326	2.67536	5.33984	14.9955	5.08782
2.94914	4.92347	3.98608	3.51177	10.8526	3.08256				6.95073	5.90163	8.03814	6.79192	2.74327	6.8109				2.60977	3.14521	10.0403	6.80352	5.094	6.01866
13.2534	8.28083	7.03998	3.11211	2.63305	2.58945				6.09811	8.62271	4.43232	6.01405	2.92754	10.7061				4.93342	11.7724	4.07287	21.3085	1.89736	4.76272
3.93666	5.02879	5.34965	3.72564	5.88035	6.726				5.10346	2.54117	10.0388	2.23742	14.9432	14.2105				7.57121	9.27757	2.70975	9.32063	6.38136	7.75068
3.40284	4.86408	3.55089	4.16536	2.95036	5.06828				3.77986	6.73233	3.73388	6.54576	13.3079	5.78322				7.5128	2.70481	6.14144	6.34139	2.80091	4.34404
4.20796	1.599	2.75194	6.78511	5.49528	5.23291				9.20239	4.57737	8.59001	11.0519	4.87271	22.5879				1.86046	5.70746	1.02752	5.0729	3.32384	12.8889
3.50889	6.26438	4.84456	2.64499	3.28211	4.45325				5.62937	3.91418	12.4018	17.4567	10.9302	4.05317				8.45916	2.16067	3.55631	5.81058	12.4561	8.6947
2.6326	2.99332	8.0205	5.40786	6.26603	3.98796				3.96639	3.02362	16.2065	6.50087	7.45127	5.35438				4.60438	3.4074	4.22655	3.75163	2.97501	17.1587
3.3258	4.57853	13.7752	7.81397	10.4039	3.3476				4.62441	12.5607	14.1485	4.97242	4.12215	10.7739				1.81703	5.4741	2.75227	6.4155	6.72568	14.2233
8.01892	4.53281	2.75925	6.94501	7.60051	2.34497				5.19327	5.75801	3.09651	11.3275	44.4748	5.05978				3.03293	8.40809	7.50985	5.1454	10.3091	7.48328
2.62227	3.33354	1.38259	6.78447	8.50355	6.52662				3.27888	16.0701	7.90845	3.8787	10.1169	6.98191				5.85168	4.15446	12.6034	9.66658	20.0083	6.28751
2.48125	2.50985	7.73948	4.4137	7.32264	4.99968				2.45243	6.98636	22.7265	10.7552	36.1744	5.03343				4.2788	4.02358	7.69723	4.24339	13.5612	2.58423
8.98901	0.96358	7.20827	5.3474	5.80991	3.84471				5.06064	5.65504	4.91519	7.36806	2.76895	11.7896				2.39616	1.90525	3.08088	14.0418	4.95764	3.76422
2.42547	4.52343	3.66269	5.61081	3.15187	2.07176				8.44576	6.93757	12.4803	2.46717	18.7225	9.69905				8.30757	9.98888	8.11516	13.2813	5.13503	12.3404
6.07857	4.66225	2.43687	8.42667	7.60307	5.72446				13.7709	11.7562	15.3004	5.82224	3.70386	4.10795				8.83562	5.57467	3.31826	9.25022	12.0366	3.34836
5.09384	0.47944	2.04908	4.02984	7.2484	5.14779				11.8611	3.07977	12.7735	3.84552	8.93844	4.10846				4.3638	4.04091	10.7794	8.36342	4.02619	12.2203
3.13412	1.80523	4.59085	3.68462	4.33648	2.73412				3.25829	4.95327	11.4382	6.07053	10.8903	4.04338				3.45613	6.73245	5.62237	5.68259	4.05864	5.27567
8.97351	9.35736	3.39691	6.65406	7.45459	4.79582				12.4727	8.30161	11.0192	1.1098	17.2906	6.36057				2.09489	10.787	3.49808	9.91667	9.56566	1.95532
2.12782	8.39238	4.77776	4.91254	1.64359	3.01526				1.8568	4.09154	10.7464	5.56468	5.90824	8.77854				3.48181	14.3439	6.03164	4.21239	4.00384	7.12653
3.599	3.48749	3.07025	4.81889	4.86709	2.58984				9.67915	4.74326	7.17495	5.38362	16.9694	12.3698				2.38251	2.00748	13.7962	16.4865	3.76875	8.36978
4.06976	4.50652	7.10682	5.81295	3.40549	7.03291				8.33666	5.32317	8.52104	8.79693	10.8954	11.7356				1.82546	6.06289	6.80532	18.4329	4.21094	2.92214
2.98504	5.29145	9.5658	3.70355	11.9052	4.98438				6.51757	3.91206	6.45687	9.66768	3.89906	1.98909				2.29737	2.20076	2.99811	8.65397	6.13477	9.87423
2.85634	4.38482	6.72748	3.79838	4.25264	5.34986				2.37268	9.57122	6.85521	8.82438	4.54454	7.85379				19.7017	6.29038	4.57246	3.81911	5.08687	9.9149
2.15678	5.46684	3.32883	5.57976	9.91692	14.6629				5.28902	7.70768	8.63079	10.1241	14.8782	18.2356				2.70997	3.5816	7.70573	2.91873	3.66492	3.90786
3.22012	5.142	13.2916	1.57011	2.12927	6.11655				2.241	5.89871	12.6683	8.5512	3.79219	7.41784				3.7246	2.85999	20.8614	7.64993	9.76026	6.42948
6.41735	3.1506	9.62064	5.18091	3.44225	2.20703				5.95087	11.1738	1.95926	3.64994	7.28754	3.67178				2.63281	4.91451	7.19575	5.04895	6.11565	3.60415
3.32714	6.03778	8.51852	5.54296	4.19787	5.023				8.97076	8.27983	9.88664	13.0861	3.34423	8.92446				1.99713	4.63829	20.2991	5.12616	18.671	5.42963
6.09603	2.25089	4.51488	6.04524	4.13146	2.76973				10.1132	3.36803	17.5999	5.10653	5.34773	7.38765				2.15962	5.76913	4.5939	10.68	6.91915	10.6966
3.16894	3.64639	2.48861	3.4927	2.95102	3.43767				5.76949	4.12477	5.0829	3.71413	7.46403	5.05861				2.6696	5.98338	14.3967	7.34204	3.52748	2.44509
2.27382	3.26603	2.86701	5.52783	3.89959	7.93474				5.14145	3.15272	14.0936	13.2494	10.8981	7.29213				4.26335	6.56435	2.74081	4.5368	10.6502	3.00553
4.25262	2.19153	2.39562	1.98253	2.27732	5.34351				5.75104	2.97017	8.52276	16.8063	5.27493	10.8186				3.03214	2.42992	3.44375	5.29549	4.36772	7.9174
9.06274	7.18532	19.6026	6.43882	2.54044	6.16386				5.39243	3.67493	15.9795	7.16154	24.4957	13.4437				15.6137	10.2342	5.84826	2.75803	17.8175	6.20128
1.70254	9.7806	1.71792	4.11584	1.65568	2.66286				13.7227	2.41886	10.2091	7.28105	8.52962	12.7274				1.93712	2.82975	5.35101	8.56265	3.76091	6.29452
8.14835	6.73706	5.23967	4.64776	2.09032	3.52296				7.65314	9.33846	8.48763	5.59911	10.7097	9.6213				5.09179	21.6768	4.6886	18.5098	20.6891	7.66154
2.59923	6.75087	1.18749	4.06571	0.831582	5.69668				15.5715	3.32873	5.37754	6.8248	8.86353	7.74137				3.22153	4.83198	5.73709	5.18993	12.5593	5.72713
2.74737	4.39606	8.0586	3.22606	4.59544	3.7538				6.2486	19.8726	6.02631	9.12187	5.43215	6.87254				1.39771	4.5051	4.09703	5.43921	5.08275	6.13915
2.60373	7.1094	5.44087	10.7958	16.0659	10.1857				3.7121	3.41439	6.01275	6.44616	6.05907	5.59578				3.18671	2.70993	2.68545	6.10231	7.39663	4.20523
6.5531	4.30337	4.46553	2.99197	3.78702	2.60367				8.00155	3.74346	1.90448	4.49298	4.39037	11.7041				0.439325	3.93055	5.10899	8.01865	5.35432	7.47163
2.88664	5.72943	10.1049	7.24796	3.47006	3.69182				2.23761	6.61734	18.6471	9.05925	14.3453	3.70382				3.03351	2.9757	10.1025	4.82697	5.82073	8.90835
4.32214	2.95099	14.4037	7.82947	3.27502	3.43625				19.7455	12.0492	16.0789	5.37037	4.40538	5.44621				2.09867	4.85393	3.41856	9.76725	7.83124	10.6268
3.03527	2.15716	12.1008	5.49299	4.8514	1.88341				12.9029	6.8813	12.7843	4.78704	9.7856	8.68359				5.15863	5.0604	3.76603	3.63917	5.55357	4.66863
6.376	2.53321	8.04973	4.79228	3.82841	6.76655				2.77278	7.72604	7.19045	6.2795	7.86898	10.3168				11.8829	4.04806	8.37183	8.13709	5.8084	6.59268
5.73195	17.7283	3.70326	5.49953	3.68316	6.29037				11.1251	6.46044	3.50022	8.38971	10.1242	4.77431				3.28713	6.50816	11.5598	5.65226	15.0629	4.22389
3.33193	5.15336	6.80294	3.22771	2.60802	4.82993				3.61314	4.82571	5.42329	4.30345	10.4513	4.08267				2.57163	4.09329	3.69392	7.10816	14.2188	4.33099
2.87967	3.28141	5.15539	5.50162	7.76361	4.37137				6.03997	3.70975	3.4088	17.1811	19.8105	7.44481				4.42234	2.36009	5.4458	3.60833	5.84441	13.2273
2.23706	4.33565	5.27846	4.00382	2.43539	4.31742				4.763	5.02603	4.84152	10.5032	2.1439	4.90418				3.42062	6.17694	4.89141	6.1334	6.92164	8.68508
1.85731	4.83102	4.66014	2.78108	2.79862	5.66038				4.23544	16.276	3.00667	2.88508	14.4307	4.38911				1.63567	10.0938	6.81977	14.1537	17.4962	16.7691
9.33915	3.90701	7.53991	5.0973	4.29242	4.19127				4.64579	3.63752	5.90746	3.00512	6.72276	4.00797				2.99645	11.8447	7.96508	26.9572	14.097	5.13309
3.5943	3.89023	1.96327	1.72444	3.54671	4.66918				8.94937	9.42096	3.3369	5.4327	10.6966	5.70934				6.75221	2.12325	6.99817	6.23856	8.93154	14.9571
8.10246	5.8272	4.2672	3.42166	5.78921	10.0318				14.9661	19.105	7.97769	18.4909	5.49245	14.0764				3.40761	4.08634	8.32907	3.28154	16.313	2.18684
4.73544	6.6929	8.24608	4.07299	3.65502	2.91739				4.95222	5.53058	5.36238	7.78571	14.4986	10.9368				1.46526	3.46025	6.80042	7.55519	3.73131	2.37735
2.71302	6.75836	1.79106	6.6368	8.31671	3.62561				10.0216	8.35613	9.57701	5.7185	5.94751	8.70517				3.07695	3.34764	4.94213	3.73065	6.73108	6.04454
2.90817	5.46563	15.3834	4.795	5.96875	7.50197				7.27402	8.29073	5.44473	4.75793	5.11739	14.7433				3.80447	5.50851	5.23545	3.50278	2.03277	14.2739
9.60107	3.96358	14.5567	6.29928	4.52858	6.39998				5.44919	10.1437	7.67831	7.23704	3.07972	5.0506				2.91312	5.88202	4.69454	15.3483	7.96812	4.47981
4.90227	3.38141	4.87083	1.69128	3.44972	7.76653				9.3714	5.05361	10.7855	6.98319	6.30436	5.61685				4.52878	7.15647	5.01614	8.22218	4.10361	6.98912
1.07573	4.91673	2.99815	1.78057	9.42919	9.09632				7.181	3.83862	10.5721	10.2553	12.1775	6.61602				4.91146	12.3617	5.65667	3.67552	13.2467	4.28474
2.78395	5.41896	3.88607	4.30921	1.16619	2.51419				10.4503	2.46631	7.51243	25.2619	5.71556	7.35222				2.70954	6.90709	4.88108	3.96102	4.92817	5.51414
9.17185	2.23077	15.4521	9.05239	6.65879	4.8009				4.61099	4.24458	6.283	3.28601	5.17423	7.73449				21.418	3.19839	5.51248	8.58542	7.17137	8.28521
3.35557	5.37489	6.00182	6.02587	2.1331	1.84103				9.09008	3.94569	7.1199	14.7959	1.88823	9.298				4.4124	4.6306	2.04252	7.24347	12.5375	2.91374
4.667	2.77979	3.41145	3.62259	5.9499	6.74099				3.57412	2.74857	8.95563	6.53918	11.4309	6.68652				1.75397	2.10705	6.07357	3.98081	5.441	5.35664
14.4532	3.74887	4.90113	2.80457	2.05511	5.75381				12.3274	5.37229	13.3688	6.04716	3.78035	13.7687				9.52831	4.41376	7.14698	5.76495	7.80194	3.69522
2.22094	5.40845	5.39121	5.58259	9.76549	3.62724				6.23788	18.113	5.43733	12.491	8.66551	12.4775				4.29742	3.79192	3.2752	6.09159	11.0167	8.26937
2.76185	4.70926	4.3296	6.01154	5.36516	4.0961				6.58209	8.63567	4.55865	5.371	8.15052	6.29668				4.11183	5.23466	13.2986	3.29878	2.47264	4.36058
3.23774	4.71151	9.02055	3.29334	1.5437	5.12045				4.35406	7.18874	15.3257	4.13061	6.32753	2.97792				1.28264	0.992379	8.47137	2.38449	11.2403	6.70645
1.74054	2.13192	10.024	3.59536	5.85684	3.95863				16.5936	8.16739	5.89901	2.78446	5.67719	8.95672				9.85088	4.09568	17.1281	3.01363	5.03465	6.72675
3.09552	1.36116	5.74361	2.24802	5.63263	5.1921				8.65183	4.46032	14.8054	17.2383	4.03788	3.52272				9.10275	2.93346	3.01963	14.8294	8.66285	4.83137
3.0601	5.11414	8.29288	4.19248	5.09508	3.32035				6.57873	6.419	11.6267	10.8545	6.60805	6.08534				3.44092	6.65497	10.4251	3.73933	13.9399	15.0816
7.33642	2.26705	8.80489	5.13161	7.108	2.63954				8.37557	9.71234	9.37431	2.96361	6.24023	9.44469				2.68222	6.53341	5.87329	17.4496	1.27456	3.77365
4.7163	3.94473	9.75624	5.04594	21.4452	5.33286				6.4371	4.09158	9.91135	11.402	4.51388	14.4101				3.65577	3.43452	6.62388	3.81812	17.1546	7.89323
4.49179	3.17573	6.69611	10.8961	8.33832	4.09466				1.83906	14.2277	7.12448	7.111	12.4683	4.58535				4.418	2.51779	11.9961	1.07581	14.9182	5.61833
4.87765	4.40477	9.03819	5.27955	4.32391	6.11235				6.98752	5.52493	7.67186	3.56074	5.17819	6.00615				4.09204	4.17928	9.70162	13.1866	9.95214	13.8989
2.03894	2.28098	11.5736	3.26545	5.04947	5.97022				3.29403	5.88712	8.40041	9.55372	2.82194	5.6866				3.76274	4.37126	3.20238	11.4539	21.1108	3.31903
2.97178	15.0868	12.4254	12.1793	5.82642	3.50378				3.04068	19.9336	10.1659	4.66812	4.10044	10.424				3.30017	2.08759	6.5576	10.9549	9.21811	5.1587
4.72568	3.56152	4.59334	5.4623	7.58905	4.08641				8.52471	3.82881	5.24101	5.77213	10.2029	10.5189				3.54394	9.84873	3.94039	5.66236	6.88547	7.00429
12.6459	6.72999	4.48295	2.8632	8.1969	7.70108				3.44243	2.87389	2.47096	6.22892	15.2046	8.67073				12.2107	1.10179	5.81881	7.44513	8.71747	6.67834
3.55394	6.50358	8.93496	4.08484	5.85063	1.13357				6.11136	11.6989	8.64726	8.95543	4.60247	5.0317				2.38869	5.26671	3.89518	3.73513	8.27562	8.68087
4.80055	3.95292	2.65981	4.10742	2.65798	5.00895				5.64979	7.59117	3.85669	9.4271	10.1859	4.46676				8.67222	7.52175	3.26912	11.4343	5.16669	6.70665
4.77302	10.814	5.08066	4.12471	2.28183	5.76233				4.7869	7.40498	8.33561	2.82771	5.64233	8.12417				2.97514	7.2388	7.39871	6.85743	9.16911	7.84238
5.64523	3.14459	2.55361	6.06348	6.53422	5.57872				8.61562	6.18855	6.70502	11.9694	3.62761	4.00207				1.58653	9.28141	5.61235	11.7671	11.6893	5.38367
8.43252	3.54702	3.86126	5.54666	4.97887	2.47077				10.3667	12.1109	9.993	3.18772	5.26921	4.35026				1.35258	5.14866	11.5492	11.4234	6.45723	4.62134
3.97341	4.133	4.27147	16.1944	3.61483	13.7672				7.02419	4.24177	18.4459	6.37576	6.40322	8.08448				2.00179	6.55666	6.39647	3.72162	4.50665	14.2451
2.86729	4.45887	8.47944	4.36314	4.29347	11.1166				7.39909	5.5255	20.5458	5.3198	4.20459	6.17961				5.71796	5.49241	2.25891	3.71286	16.2972	13.9571
3.91725	5.54406	5.38222	7.94336	3.95303	3.82679				2.06482	16.9992	10.5805	4.89683	10.416	6.61187				3.99803	4.36937	3.10662	8.99889	2.98719	4.5638
4.27107	6.68161	19.9813	9.30755	2.55479	4.83254				5.72046	5.08531	5.00911	3.38008	4.4102	11.771				4.9583	5.20901	6.58576	5.57643	4.0191	13.3357
3.9615	2.02717	19.2896	4.87646	2.29844	6.78941				11.9269	7.59431	4.4591	8.13967	7.65827	5.93276				2.6038	8.75765	5.62901	4.72044	15.5779	4.12561
2.39425	3.57765	1.44975	3.21103	1.87444	1.56319				5.52823	9.02111	10.3767	8.42121	9.74987	5.15742				5.60273	5.97632	9.87949	6.21575	10.982	4.60047
2.73257	3.61907	5.2726	3.23924	4.77199	6.15161				3.70815	6.54766	9.71021	2.52686	7.66507	4.16798				3.37749	4.6339	9.58575	4.16643	10.2678	12.5801
3.56004	10.4052	3.06769	3.2269	12.5659	20.9517				17.1722	20.674	8.87339	6.90951	3.18061	2.41355				3.35836	15.0767	4.45981	8.44176	7.01539	8.55876
3.96671	4.43001	5.32978	16.0205	1.50198	5.36999				8.26542	9.89934	5.0017	14.9728	7.04821	9.46385				6.37045	2.01799	6.91803	6.70678	4.23187	6.52532
2.88336	2.26725	3.86041	3.87132	2.37936	4.0065				10.8076	4.85854	12.0153	7.21742	6.59738	4.77556				3.49194	4.12009	5.08316	4.07089	6.46655	9.08543
5.6594	7.52914	2.32826	6.54773	5.16046	4.37073				18.284	4.3837	16.9917	5.39441	3.62634	4.78736				4.43001	3.67019	6.95005	4.59604	4.4893	6.21168
6.62475	4.78659	6.54185	3.40524	6.69585	3.86092				6.82272	2.74844	14.2224	3.94771	3.68048	6.54459				3.37541	2.43219	6.19577	4.84564	4.01294	9.23724
18.0141	2.12644	8.35891	4.35714	4.56667	4.68828				3.51249	8.85032	10.5285	3.86991	5.87116	12.9168				3.04168	3.04551	4.52506	3.11055	7.24847	10.9835
4.15344	1.73524	6.44712	7.92782	3.41593	2.76507				1.9044	9.90558	10.6067	4.14247	4.64938	4.53107				1.88708	2.9071	6.19295	4.51506	3.22637	8.12133
11.4626	3.55765	5.44854	5.17102	4.98808	3.12984				4.43426	4.38244	8.6279	3.45918	14.7302	8.20379				4.18056	3.37647	4.45319	8.34132	4.66791	8.82742
3.08413	2.70793	10.6748	3.12827	4.48263	6.62238				2.80575	2.42503	13.9015	14.4499	9.09651	6.0287				2.03678	4.05305	4.59219	2.87734	16.0553	3.53642
4.21563	2.60747	7.2882	4.89344	3.09529	2.96206				23.0365	9.15269	19.2493	26.4889	8.16155	3.68077				3.23787	5.87839	10.0245	2.58782	9.62206	4.59492
6.39942	2.95238	4.30779	2.80136	4.36998	4.67176				3.58414	17.0063	5.48928	4.03231	31.3827	5.82302				2.8147	8.04024	5.04863	6.26547	8.50427	17.9249
1.79372	1.14121	7.60497	4.09982	4.09123	9.26982				8.76803	6.36051	6.86761	5.35267	18.6286	4.92056				5.43335	6.39648	14.6946	3.64281	10.8404	9.27294
1.99017	5.85199	5.37432	4.13746	8.87378	5.04925				8.3989	10.8578	4.9493	2.43289	13.0831	7.83719				1.89389	3.11268	3.32225	3.91599	13.3117	4.46651
3.27	4.56387	1.75989	6.01114	3.60249	6.61378				7.32704	4.18387	8.5461	6.20985	2.9473	6.29585				3.05067	9.78296	3.20856	8.14604	4.93366	3.9641
3.83507	2.54727	8.67984	4.85486	5.15581	6.34791				5.99782	2.68032	9.59654	12.6478	12.2973	9.04675				2.75037	2.26553	3.04146	2.65634	10.3227	6.051
3.46699	6.48275	8.2498	3.46595	4.1259	16.3231				8.898	10.5595	6.76345	6.65174	6.34147	15.7294				2.29763	4.24005	4.01953	3.36779	6.91506	15.426
5.76828	5.36251	4.74793	4.49828	4.02021	2.60959				3.40862	3.88618	20.2278	5.50922	9.17773	4.33023				2.47263	12.8873	7.63759	8.69903	7.30595	7.89933
4.29397	1.82323	4.00277	5.04183	14.2934	14.3871				2.64742	4.32331	6.46609	5.39543	6.00953	10.2061				1.6553	4.93419	4.83129	7.50761	12.8959	3.54923
8.78269	2.71713	4.79229	3.43879	3.84332	5.35765				2.9097	12.024	11.0495	5.33896	6.43335	4.91746				4.13984	2.61383	7.82168	8.22254	4.12558	5.51295
3.06321	6.72196	6.4704	2.57773	3.6728	3.63561				5.26916	6.83935	19.1675	6.82753	6.92755	2.95934				2.52885	4.31552	4.68437	4.02488	11.5381	5.72006
3.89065	4.73361	20.4587	5.07761	4.23611	5.60077				8.21134	6.25904	11.0141	5.33311	6.43536	3.18622				4.03972	4.49324	8.85226	5.52625	3.87081	3.1106
5.06258	5.68661	4.30016	4.14931	4.23029	4.84229				4.94733	5.23456	8.5492	6.16287	12.9704	11.8483				3.1215	4.60514	13.7625	5.408	5.47215	8.18026
3.16115	6.53778	5.02235	5.73783	5.58197	4.41293				2.39012	2.85677	10.633	12.5646	8.58065	21.0544				3.05232	4.46992	5.70033	16.2217	15.5516	0.911271
2.03806	8.90033	4.59861	3.09803	7.62764	4.97088				9.63404	6.38158	14.2492	5.55965	3.2212	11.5779				3.40827	6.56946	2.13579	22.6939	12.409	26.5167
3.69998	6.27521	6.31001	5.51862	6.49062	3.66059				5.24717	5.93509	5.73318	3.01644	3.25151	11.5241				2.99539	5.56157	7.17933	4.78904	7.48117	6.33115
4.72671	10.9402	4.71295	6.48903	7.55361	2.17904				4.33321	9.64924	12.9313	9.94777	7.20425	6.22172				2.74065	3.62284	8.80684	9.09577	5.32411	4.19105
2.03294	2.39398	5.46803	6.89211	9.12385	3.51397				3.68989	7.66939	4.35235	1.81601	5.50924	15.0004				3.27831	4.51131	4.02051	7.7257	10.3407	0.917223
9.50486	10.0781	4.24772	4.53452	4.56999	5.07589				3.82622	11.9964	2.67535	7.40808	10.607	1.7069				8.36228	3.9017	2.60623	14.0643	16.9	6.26524
4.26344	4.11681	7.08524	12.5027	4.69156	5.35811				1.93905	4.00532	1.96979	3.75967	4.30551	6.70731				4.14947	5.6457	3.83752	6.32165	10.5442	4.85957
3.03618	2.81311	2.7232	3.20547	2.12581	4.2827				7.47458	3.84636	8.10428	8.93795	7.69692	6.77676				8.12092	2.30468	2.59332	5.03424	8.79544	6.79122
8.08586	9.69229	6.52411	3.39737	4.21922	3.21467				2.97652	9.66704	15.6458	8.63482	3.92399	9.25926				3.91421	7.58139	8.20341	7.02003	3.91608	5.92459
3.53107	5.59985	13.9182	6.6477	1.62912	4.35516				2.33159	12.2226	9.82214	4.38397	16.2974	11.4267				4.07199	15.0943	6.21106	3.61075	8.61407	11.9025
3.83347	4.89396	10.0808	5.73908	2.47378	5.04669				3.15919	6.43848	9.79123	4.10439	7.24767	5.96353				1.63549	4.94856	5.17058	6.34171	11.7657	7.75554
6.94657	2.01487	4.97932	5.53038	5.44995	5.12452				4.42709	8.36027	9.22635	7.30926	10.8112	8.14774				2.72589	15.7295	1.57216	7.15361	5.74629	12.0956
6.56479	3.70576	5.07022	5.55434	9.05368	3.96627				9.95326	27.3457	11.8976	4.08368	6.20261	14.6427				4.59343	2.60983	3.79693	5.42994	6.129	6.59096
5.54031	3.33592	7.5207	6.38299	1.3838	4.93172				11.7037	6.39805	9.43381	1.94649	4.14925	5.53589				6.45084	2.72514	10.2833	6.74266	11.1372	4.88652
2.46977	4.17032	4.74345	5.65553	3.62204	4.5957				4.45552	7.36666	6.0761	8.66588	8.66754	6.46503				1.81605	0.650925	7.4022	4.9178	1.41336	5.78794
4.36438	5.32457	6.00583	2.98972	8.69699	4.79591				7.6061	4.58769	8.23616	4.29188	9.34593	7.6095				12.6966	4.105	10.3212	5.09827	13.018	5.89019
8.17926	2.76809	5.65031	4.85326	4.18355	3.82874				11.207	5.61887	5.84167	5.27343	6.22178	3.55705				3.43849	2.07622	14.8297	4.14912	13.0031	8.64774
2.37171	3.74515	2.86549	4.58039	4.03174	2.93825				6.74833	12.1465	12.4956	15.3939	5.31906	3.40724				2.98612	4.86251	12.1515	8.30425	14.1073	8.70229
4.28391	5.60602	4.02971	6.88448	13.1136	3.91806				8.99682	5.17078	11.5956	6.26936	7.4647	8.1588				3.72287	12.2777	10.2147	7.98021	8.40008	21.0833
6.84867	11.6345	6.74117	6.81425	6.01641	3.65334				11.2916	12.2115	10.8565	9.25459	7.04496	5.2617				3.85722	4.67567	6.06864	4.6217	16.8278	4.92246
7.48629	6.1846	3.04431	9.61297	3.34178	3.65249				10.5573	7.63629	13.4767	9.39891	5.66965	7.53315				4.59285	6.36238	8.3789	6.43179	4.96091	4.27176
3.13844	5.70967	2.73262	5.57997	1.43112	4.79197				7.85417	6.10657	7.9716	5.18688	14.8762	7.77072				12.6536	9.74917	12.213	8.11282	5.90264	6.12285
3.62588	7.49267	3.34572	4.32679	9.8579	6.05369				2.09947	3.60976	8.87604	3.29625	9.07279	11.4185				0.992298	8.10902	3.26104	14.0401	6.12772	2.33355
11.4055	1.12254	10.5533	4.66526	5.6293	2.23345				5.38381	5.24025	8.41665	5.59631	8.0274	7.79955				3.4457	4.93117	6.22232	4.45197	12.3849	6.73461
10.265	0.644433	6.09226	5.07603	1.43438	9.84455				3.26961	4.08935	2.72803	6.63942	6.94989	2.47042				3.00179	6.00009	14.2686	3.06452	4.07356	4.27894
2.64932	1.86025	4.02828	2.42943	4.50395	3.04575				7.10064	4.01768	8.76401	7.41006	4.9069	5.96561				3.00582	9.02505	5.05033	8.40315	10.0509	5.48637
3.55637	2.665	2.2422	3.56	7.44171	1.86152				4.14833	11.6779	12.9483	4.91155	9.51604	9.72327				2.83894	3.34505	15.4905	2.98905	12.6664	5.48331
4.55764	4.29558	8.6812	3.76248	4.85896	2.75061				4.15687	4.60316	9.38212	7.20066	5.96313	8.71822				4.99908	6.25609	2.50739	3.60884	5.04285	7.63875
5.08934	13.6378	7.33075	7.87024	6.47328	4.0283				12.2216	8.37455	18.7794	2.37476	4.61974	2.68329				2.56065	5.1988	9.56269	8.90068	18.0791	5.01547
3.36908	3.44122	4.78701	5.05072	6.9876	3.76674				1.80317	8.9358	2.57687	2.62936	3.00752	8.68998				3.22422	2.25723	4.65226	7.32935	5.79075	3.47409
5.18459	3.84647	2.78799	4.79319	7.69037	2.52086				8.49628	10.6258	6.67527	11.6279	5.82563	5.58971				4.12523	2.82801	20.1703	2.42748	3.6094	2.96644
4.85155	3.56079	3.57106	5.6015	11.7214	5.78804				2.67803	6.71318	4.1288	4.58038	13.2436	6.88718				3.38441	5.65155	8.1728	10.3278	21.8633	2.59874
2.42829	4.02338	5.9262	3.19333	8.98894	6.49884				8.53935	5.26238	6.017	10.726	2.54785	6.45761				3.90909	8.80836	9.17409	7.72873	6.18614	5.93002
3.14055	9.7359	6.35777	2.10913	4.4132	6.73423				7.90844	5.11321	7.46612	3.45957	20.8992	6.70532				3.28319	6.62898	5.2839	14.3421	5.83061	5.73796
6.4018	5.16442	9.63133	3.40911	4.80331	4.05927				11.313	6.4986	4.29705	4.3767	13.0504	7.65293				4.02523	3.63614	9.80044	4.3558	23.2662	5.62932
7.54085	4.7578	11.9861	2.86772	2.61555	6.40049				9.48487	3.62258	6.80783	3.00881	7.11867	3.83725				4.11203	4.82887	4.8634	6.19436	3.85878	6.6992
3.73609	4.03624	10.3676	4.08803	5.33967	5.26572				2.26538	5.43282	2.69416	5.44623	5.58598	11.6831				4.86477	3.57467	9.55513	4.38068	9.68925	8.73299
3.27604	1.70865	2.14333	7.27103	4.64745	5.32349				8.61236	5.58896	3.61901	0.954356	7.68592	4.63927				3.14534	3.88209	5.80184	7.78663	2.30354	14.0942
1.34564	3.20864	5.8687	3.52747	2.02804	3.75653				7.43723	1.91627	10.2876	3.35774	4.96615	7.01076				1.55465	5.544	4.68745	7.75229	30.4873	8.46598
4.04932	1.84837	22.1431	5.09233	5.05451	2.02323				6.93558	10.0154	16.551	5.95497	4.77998	10.4897				5.25265	3.03471	2.9022	5.78897	4.82111	2.04574
3.50433	5.09001	4.25241	3.29202	6.55838	2.22183				8.02786	18.7838	6.92736	10.5732	4.75367	3.62948				5.41211	4.0742	3.6909	17.6765	8.45088	4.17549
4.63103	3.93378	3.51812	2.6815	5.32431	5.26362				13.3492	10.3559	10.0839	5.5879	6.30082	4.53326				1.9035	5.86502	5.80284	2.55527	10.0328	2.86502
4.17845	6.44358	7.11355	3.30546	8.6381	2.91228				4.08437	1.93171	8.79711	2.27257	4.97712	4.71612				10.306	3.62708	4.48173	1.3857	5.7237	18.3402
2.11583	8.64344	6.21591	4.87658	14.3599	4.28186				3.46618	8.2736	7.83952	6.75424	8.12759	8.24308				2.25603	4.37871	11.7745	25.7902	8.1782	17.4558
5.98088	1.8882	1.70116	3.66741	2.6033	3.17985				9.08459	3.29869	5.08251	4.47992	16.1384	10.0983				1.96613	4.77017	6.29074	3.20627	6.57388	39.4763
4.84277	6.61671	12.0313	3.34385	4.19938	4.00705				4.32586	10.1311	7.62687	3.02389	14.3536	1.1066				23.3763	5.77135	4.29672	4.36243	5.72562	6.28971
2.40977	2.41213	5.22818	3.19494	4.24977	2.61817				10.4045	5.27547	10.8128	6.53859	4.76087	2.49616				1.36808	5.1598	7.89654	6.0061	5.89364	9.50043
8.43165	11.866	4.51972	4.80911	11.7853	4.43059				5.61852	5.87452	12.3587	5.73971	5.32368	4.30661				2.88546	7.07391	8.25092	5.85283	2.53354	4.9929
5.22973	2.29072	9.55513	3.43244	8.10219	3.8153				4.8286	5.34649	7.61416	15.4029	6.8638	10.0673				3.77294	2.12108	8.81118	15.5122	14.6577	4.6433
3.79672	13.5288	6.82277	4.78405	3.49715	4.49828				14.6311	6.95545	7.94693	6.71782	3.71248	10.2211				5.17091	4.01286	6.30931	15.5902	4.85552	3.63508
0.935125	2.14966	8.31111	5.88223	13.9367	2.18154				7.02746	5.45524	3.47477	14.8699	3.99656	9.76907				5.40494	4.42134	6.25023	3.292	4.95705	3.34524
2.59885	1.21829	2.51099	14.1957	1.94629	3.16737				15.3181	7.2636	3.62352	4.71286	4.98837	10.2339				5.28758	7.35099	3.68212	4.54319	2.59244	6.83283
4.61569	9.14175	9.06014	4.28439	5.97302	10.3853				8.58395	7.02001	7.69394	5.91875	4.28051	6.54368				14.0897	3.7779	8.13137	4.23819	1.93822	3.35157
6.20361	6.81239	2.48069	2.87568	2.64788	11.5136				8.61113	11.5355	3.03697	8.94979	5.72602	6.74751				1.59229	3.93624	5.33605	14.8043	14.081	2.58324
11.6375	5.29593	6.48409	5.23918	3.2067	7.41942				5.01252	12.3453	14.1782	4.97866	6.00462	4.54589				2.52028	3.62735	5.20898	17.709	11.3579	12.9448
1.91292	6.74794	9.21237	3.16354	3.19847	4.441				9.56997	5.17916	16.7123	4.27616	7.04075	6.64685				2.17625	2.29304	6.365	12.3127	3.91835	4.09923
3.34213	6.36018	3.52293	1.67245	6.80273	4.19451				7.38282	4.97048	2.82554	12.1819	6.11929	3.79464				2.3541	6.85751	16.6724	9.05255	6.39747	6.79708
2.45851	4.20657	8.60467	4.06042	3.04854	2.4927				2.34958	18.7903	6.54028	3.27342	4.46428	3.87135				3.63086	7.96799	4.92107	7.21075	5.36788	2.20446
13.3394	3.10128	7.07083	5.5018	2.3386	7.9411				7.40342	10.7482	7.75377	8.97902	6.95147	9.4941				15.5539	5.33188	8.77528	1.96858	6.35098	3.68952
2.71849	6.85952	6.27699	4.37638	1.92465	5.00639				3.44458	22.5262	9.30526	2.69488	9.65222	7.28539				12.281	6.1491	2.34882	15.2663	7.56004	4.19231
4.64145	10.0328	1.6027	4.14856	2.83116	4.3378				7.39319	3.45491	14.9628	5.56885	7.08477	6.8121				12.7104	5.45596	6.5143	5.78785	9.67264	10.3589
6.46973	3.99229	18.264	6.11539	2.84178	6.0368				6.23119	5.32345	10.5846	3.94091	6.68991	2.37995				15.0113	5.61242	5.81963	13.106	10.3104	3.10087
8.75782	5.46727	3.9356	4.14045	8.3478	5.48571				9.53958	5.35191	11.3534	2.73321	4.0884	5.74309				7.78235	3.28085	4.22201	6.37604	11.3687	4.40708
	7.31716	1.5553	3.86662	5.90955	3.00782				9.12186	2.29271	6.34613	5.95046	13.3303	7.9671				7.17894	2.36358	7.25334	7.80592	11.7821	3.91627
	4.50907	3.87059	4.10751	9.71515	7.4702				0.631081	12.5866	8.54034	4.29669	4.17599	10.0994				4.90631	2.06009	6.75901	7.98885	8.13098	7.52359
	4.75185	9.86614	2.5948	17.2502	10.0985				4.67399	6.79225	6.34575	4.69867	1.9297	8.3058				9.09264	4.89195	8.07348	6.80376	4.40089	8.57786
	2.99274	9.15546	3.28154	1.56063	12.4765				7.69119	8.30203	8.94158	4.54848	5.40245	5.19314				2.74937	3.67722	12.4651	6.4609	6.65391	4.04866
	1.85837	3.59344	4.75503	2.8711	5.69182				10.6545	6.44331	5.34366	4.88428	4.49295	3.16219				5.09996	1.51031	4.09267	2.95031	7.40706	7.3542
	3.6718	5.95619	2.05322	3.84211	4.28906				3.18148	2.48683	12.3948	9.5973	6.06808	9.19928				2.4901	1.99521	4.04452	5.27502	7.02527	24.8713
	3.92497	7.56122	9.66015	4.87959	1.76501				7.07932	5.70903	5.3894	6.15749	6.19215	4.69815				2.78772	3.52277	4.19343	6.52085	6.35726	24.3319
	2.59165	4.23659	3.27035	6.73604	5.77279				8.04052	6.61722	4.20464	6.7003	10.3542	6.47851				1.22395	4.57096	3.75299	7.08175	6.37277	5.22859
	2.37414	4.15903	3.55941	8.00303	3.45645				11.4979	4.53505	9.96912	5.20136	9.59038	7.88955				3.16499	8.04007	16.355	4.72794	15.2776	12.1796
	6.0419	7.71199	3.81521	3.60184	3.38364				9.41172	3.20325	9.28364	14.6428	10.6044	14.9426				4.91395	4.84782	12.961	4.38052	15.6287	3.96139
	2.65641	3.34376	4.14448	4.95047	17.7975				7.74662	3.04113	8.92615	8.17911	3.09547	2.75131				3.30373	4.03877	11.5813	8.11668	8.05334	5.47259
	4.56696	5.65554	4.18416	2.657	6.5866				4.55312	4.21837	13.8058	22.8307	5.06525	8.95479				4.14515	4.4154	4.56699	4.15795	3.62528	6.8698
	6.34601	4.06175	5.55653	10.8401	3.07938				5.47797	4.20118	5.66812	6.75746	7.14428	6.33038				3.2049	4.67887	4.10029	6.03043	8.70334	9.26667
	3.91705	4.92245	4.22948	6.25628	1.67694				5.14003	4.07144	8.33534	5.82848	5.26695	4.73279				5.77483	4.66369	4.46679	16.0693	13.3635	4.47791
	3.45633	8.4066	3.87165	2.91933	7.02014				3.1461	1.67365	6.15813	6.92911	7.75855	10.5495				15.3836	5.38451	5.96484	12.3886	10.1804	6.03725
	8.46005	3.94774	2.94988	5.21091	3.85618				3.22548	7.03719	16.9832	13.4825	9.8922	4.06294				2.33049	2.7779	2.40052	1.35406	14.6897	7.18368
	18.266	4.00533	7.66522	4.96173	3.80037				1.81164	12.9935	5.29015	8.40347	4.49311	10.2833				3.23733	4.02416	5.25623	5.43238	10.6214	4.75404
	11.164	9.12409	3.91642	5.18133	4.38689				3.64264	6.25917	4.07747	10.9676	3.8734	3.20587				5.92381	16.0703	2.56033	2.45853	8.07408	10.8839
	1.61443	3.81814	4.09961	3.16055	4.78129				5.86191	4.75404	6.52824	32.2056	3.44587	5.60798				4.49932	8.07957	2.84145	5.44948	9.43962	7.65374
	2.38723	16.5844	14.6322	5.88356	10.7942				3.69332	3.63369	7.37615	7.91637	23.663	12.8117				10.3797	9.94833	2.81227	3.87079	1.42622	5.65628
	1.37977	6.28514	3.36253	2.57916	4.08263				23.0123	5.80674	4.51404	3.64941	2.08774	5.40418				3.3113	5.2388	7.98365	8.05148	3.81982	10.9871
	4.68323	6.04275	17.7867	3.43734	2.95831				4.02386	9.1022	6.22112	8.61993	3.59001	4.74092				3.04495	11.2052	2.43082	3.62302	3.85993	5.48241
	4.21281	4.5364	2.90637	9.0446	2.65523				6.35013	6.19332	12.654	12.5884	14.1124	6.9714				2.9201	4.35044	7.3038	5.99164	4.64837	5.67307
	4.66112	13.5013	4.49692	8.87537	5.76994				7.14102	4.23876	6.23117	3.16097	2.95131	4.39302				13.1087	6.993	3.76689	3.25974	9.92685	2.94156
	4.21229	8.65808	4.91078	1.85821	8.35914				7.69853	4.62563	13.4895	22.2773	4.7457	4.27487				12.2368	3.25945	7.04676	4.25587	10.5734	2.53587
	4.41153	4.1155	7.7433	4.37892	4.10463				9.17213	8.86109	10.6842	6.31888	5.80337	8.40877				1.74376	2.27795	7.12871	9.58659	16.2779	7.3222
	3.07279	3.94798	2.80313	9.15937	4.61259				4.55795	11.3827	7.20213	3.37358	1.03959	9.73548				2.9277	7.727	8.9846	6.91266	3.31112	2.26921
	4.397	5.12223	5.43255	5.13083	3.84172				4.76912	5.64265	11.1655	16.3089	4.05515	4.45385				4.63088	11.2879	4.83689	6.39435	4.97466	4.09736
	2.08901	5.72421	7.11586	9.6929	5.80312				11.7431	3.99962	7.87303	13.7122	4.78837	5.86833				2.87202	1.9303	13.7006	6.68254	17.2429	16.5717
	7.03693	3.42189	3.39995	6.98137	5.70746				8.75036	5.64816	3.81021	4.34936	2.94211	3.60402				2.8995	2.10378	24.1113	30.2589	11.6755	3.77313
	5.24276	2.93164	3.37924	4.29311	4.27185				5.66186	5.07128	14.48	13.027	3.04743	10.5406				9.11424	1.8095	4.8862	11.8397	16.3962	2.98505
	3.85266	10.4569	2.5603	5.66588	3.78159				6.34662	4.50383	7.25408	3.70672	1.4348	1.43378				3.22995	5.59335	3.39933	4.69481	3.20403	11.5712
	16.0751	1.33837	5.00243	1.92031	5.60397				4.27854	3.77781	3.16537	3.72717	14.0801	11.6523				3.76922	9.60952	2.6501	5.922	11.2471	13.678
	4.86053	5.60724	1.4025	4.44952	4.89715				3.73795	3.25173	4.55173	2.30133	2.20706	3.31807				6.69938	7.33096	6.94571	7.88714	7.48647	8.73537
	7.02835	1.77881	7.14725	4.07546	1.65272				13.7418	8.36522	6.40638	1.95728	5.85215	5.64993				3.48742	5.47608	7.80882	4.10569	11.2708	0.982057
	6.10056	3.68152	9.85907	20.7586	4.47716				4.3383	8.69896	7.4036	3.52138	4.9903	12.1093				6.07886	3.86742	1.6203	4.34744	15.3273	2.67305
	3.68821	7.77312	13.1933	6.83771	4.40595				3.97577	8.74545	15.0575	5.05911	5.251	6.28287				3.30376	6.96901	4.54116	2.82406	4.59219	5.57602
	6.38445	3.4604	6.21447	2.07134	2.25642				11.9812	6.02586	7.14615	8.71738	5.67758	5.08296				5.51662	5.5958	4.11888	2.58943	4.65955	3.19974
	6.25463	4.45681	2.35458	10.2557	3.52213				17.1494	12.6769	9.11935	11.6386	7.23552	4.6609				14.4583	9.1751	4.97865	7.84567	20.216	5.53459
	3.87705	3.95511	2.72542	3.25232	8.57744				3.61369	9.73589	11.4093	4.30234	7.27356	8.28083				2.3461	5.54252	2.78803	10.6934	5.1616	10.9987
	2.49336	2.99796	4.75876	10.9939	2.75549				3.85875	6.15679	5.91721	5.17533	10.2036	5.78866				2.3712	2.71377	11.6916	2.22999	21.5314	7.7292
	9.01484	7.70441	6.09629	2.42389	11.5081				3.22874	6.06485	10.7647	8.52366	4.95311	9.11861				3.46992	3.85261	10.9465	8.21491	2.37282	5.09141
	6.62455	6.06916	3.22393	2.1016	3.8921				6.69998	14.3347	10.8762	2.89976	9.32276	8.14133				3.86035	4.06488	7.12693	5.37946	12.8851	5.40861
	2.91987	6.14566	3.98547	7.35308	1.65498				17.8302	6.80299	4.10281	5.94496	3.32655	8.49531				3.55283	21.7992	7.84132	13.0346	9.30082	4.69827
	13.0614	2.65967	4.02375	19.967	0.890194				3.13865	5.64891	1.87336	9.61481	3.91396	14.9532				2.96462	3.4482	5.52378	10.104	5.79435	10.1898
	2.40375	4.39526	4.43904	0.956475	2.0868				11.6234	8.44662	3.88362	6.82765	12.059	5.55964				3.54128	7.41718	8.14652	10.6708	8.14421	4.35466
	3.29828	5.92223	2.83533	4.74483	10.9066				12.8618	3.50156	10.6366	3.54643	5.1898	10.6927				4.46183	14.1589	3.01306	3.85043	3.73046	14.955
	12.2997	11.4285	2.91716	4.56843	6.06054				9.33979	2.78048	7.9669	10.327	13.3336	2.96972				2.58132	3.07139	6.03932	15.8578	34.7505	11.6236
	2.70533	5.73628	6.65625	3.82462	9.68244				2.1843	0.614668	8.10946	10.295	5.87713	3.12997				4.28667	2.75164	6.52836	4.42961	4.90818	3.23476
	17.7042	4.00922	4.23545	9.4738	7.0015				7.25421	2.55315	2.16977	5.49256	5.32534	4.48361				4.17762	7.87722	13.296	5.40413	4.30256	3.31813
	7.02387	7.0608	2.8728	5.34068	4.21451				9.90129	8.27843	5.50022	4.11591	17.7753	5.12897				3.3932	4.97505	6.74672	3.18467	9.30378	4.62634
	4.94891	4.5074	3.96978	3.53553	5.40616				4.71318	3.27817	4.52163	8.95241	4.1042	2.58169				5.33706	10.1591	9.57547	5.7809	19.115	5.40993
	5.02516	6.79114	6.89334	3.94048	4.1829				6.34672	4.08301	8.67912	5.61589	9.19009	11.6778				6.26371	6.94919	3.50913	8.76977	5.42968	9.06336
	3.40048	3.13464	5.19258	9.7911	4.14754				1.71197	8.53949	7.86554	1.79586	10.1333	15.4084				3.33064	3.84974	7.2795	3.53358	2.98319	3.59381
	3.79545	5.19995	6.85039	5.51888	3.5246				2.60614	8.51992	4.58793	3.88036	4.86714	4.45263				5.56403	4.87922	5.89913	4.19205	4.48864	4.39265
	2.83086	8.41849	6.71357	1.88622	3.70874				6.92085	3.45688	5.40629	5.37197	9.76814	3.7415				13.1178	2.99659	5.67997	3.62358	4.41794	10.251
	4.40682	8.86475	2.9714	2.95905	2.69481				7.01083	4.12747	3.69042	7.26529	6.52633	2.78095				3.20361	11.3533	11.1706	8.88212	3.83079	10.6321
	5.449	4.19322	5.84277	1.91306	6.57213				5.35109	7.55315	3.51788	1.65813	7.3972	3.85792				3.21678	4.32989	4.37917	8.52808	8.40375	7.61714
	4.37079	3.12101	8.25232	2.16591	10.1251				4.61952	4.36215	5.6233	8.42554	10.5192	1.33513				2.38545	2.98785	4.91454	4.11103	4.77007	6.42038
	4.25867	3.45449	4.33847	11.9441	2.29306				6.51642	4.43815	14.1578	2.55527	7.73059	3.26507				3.7461	5.7487	13.8909	4.31498	14.461	6.25971
	9.10378	11.3339	1.01093	6.32801	3.74045				3.94632	8.41724	13.8841	8.83124	5.75167	9.99093				2.63643	4.76896	3.68797	5.04652	3.15809	4.33411
	3.22423	3.91506	4.03083	5.63601	4.27705				4.65568	16.7092	10.3444	11.1125	6.37062	3.33963				2.21249	7.57035	8.5505	4.86766	4.57948	9.43874
	3.30005	1.65561	7.52394	3.6224	2.62341				5.45453	10.5855	4.02816	11.5667	9.85621	8.98671				5.16688	3.33901	1.76206	10.2719	7.43093	6.79384
	3.48158	3.90038	4.12695	2.78667	5.18618				2.91238	6.6364	3.67699	7.84459	4.37768	17.9624				5.41778	6.46111	7.10307	8.94395	10.5164	5.59233
	5.32226	5.8124	28.8454	4.35527	3.02836				6.11801	3.49595	3.42289	8.87202	6.54445	18.2585				11.1984	5.22501	4.6654	11.6079	5.9287	8.33316
	2.66769	15.7033	1.76224	3.75747	6.66545				7.89667	4.47273	5.96603	10.075	8.83142	5.75689				3.03969	2.16974	0.853225	3.97019	6.89879	6.15531
	6.92496	23.1008	3.16482	1.28742	5.51349				4.14786	2.08716	3.04523	6.45312	2.91539	6.08134				4.97551	2.27771	8.26346	3.57671	5.3695	4.42871
	4.03101	4.12364	4.21639	12.8749	3.5444				7.81726	9.11786	7.23457	5.98411	7.16273	7.19387				2.74891	7.04083	8.6967	11.8334	6.84073	2.53938
	6.19485	2.2072	6.66065	11.8609	6.46561				8.54002	4.49543	7.74396	6.41217	6.60392	7.80404				5.45662	5.81506	4.98178	6.95992	10.2903	5.65056
	11.0561	4.5494	7.15104	1.53914	9.21073				4.22113	2.06213	10.4267	3.59826	5.38452	12.2831				1.68085	5.87497	4.29919	3.44601	5.98156	1.56125
	7.16942	2.44399	6.111	9.04796	3.82976				1.52667	2.77524	9.57933	5.76242	5.56978	7.3528				3.71953	14.0854	8.03111	5.24192	4.07578	6.25428
	1.62447	3.62914	3.76431	5.84419	3.42247				4.35706	2.63679	4.34959	3.00734	3.1498	3.59178				4.06164	2.93711	10.3123	5.33998	7.49694	5.59648
	1.934	6.85634	4.44926	5.00899	3.65413				5.47801	5.52446	6.74908	16.1617	4.81257	11.7597				2.80411	7.99505	12.3573	6.05703	6.89443	4.34382
	3.46514	5.25687	6.4158	7.43589	4.53653				2.44641	8.99123	6.12266	9.62911	7.32836	4.48694				8.86638	8.69722	5.38548	4.15641	1.71989	8.21806
	5.41303	5.08967	3.36136	5.50988	9.19754				4.06186	4.82726	14.8575	2.99215	10.9798	4.18845				1.26185	6.19557	13.2249	9.6724	11.1844	3.23144
	4.33736	3.31731	1.56429	2.95555	3.94286				5.76946	3.70067	9.77774	7.15999	6.92785	2.25616				3.06195	12.5055	4.98288	5.29833	26.5133	4.40994
	4.88261	3.57362	2.45108	7.35183	3.18829				6.96411	6.30618	8.07145	2.25761	2.34402	10.3202				2.85594	5.61456	14.2619	5.31896	9.53736	4.19813
	8.71827	8.22415	7.68696	4.48705	4.01718				7.60276	15.6508	8.21919	13.1174	11.049	7.02571				1.69992	4.53366	12.1242	18.3573	12.2702	0.447034
	4.19032	4.57803	5.64797	6.23594	5.53764				5.28801	11.7246	16.9835	8.53869	4.77714	2.89379				1.62751	6.22116	4.46269	4.64823	10.0671	5.28711
	2.52223	1.82954	4.22475	4.7696	6.06046				10.6398	2.2933	10.5312	0.362202	3.95128	3.81804				2.95828	4.59533	13.5142	11.5075	12.371	2.68759
	1.86199	5.49956	6.80573	5.20058	5.36156				13.5099	3.71731	7.24327	2.95494	14.7658	4.30008				3.33255	5.44446	5.39977	15.0756	5.22834	7.22174
	6.41119	5.55378	7.20341	3.31241	4.37642				6.34978	4.45398	10.822	8.05006	6.5065	5.30392				4.18278	4.72832	3.213	2.34979	7.60757	5.79087
	3.95128	5.64278	4.59369	3.02029	2.52845				2.19999	21.5746	7.32009	9.8891	3.40188	10.3421				2.4718	3.34419	8.48467	5.29094	5.62653	6.32803
	6.74721	8.23074	5.09571	3.4241	4.21731				9.14889	4.57789	8.31583	3.99689	4.89953	8.16199				1.97692	8.95289	7.18066	7.06616	15.5496	5.15537
	32.9569	7.08164	11.0582	7.08811	3.93888				3.68005	4.58146	14.5974	12.2097	7.67591	3.58845				2.88714	7.83669	11.5119	4.56033	13.7712	2.84344
	3.63889	4.71788	4.25374	5.80903	3.25894				8.99866	3.02398	1.71071	14.3704	7.54894	4.51777				6.19119	2.88034	9.50027	5.76478	10.5527	8.99695
	4.93266	3.46593	2.25763	3.37563	3.34608				3.01513	19.6569	8.88044	9.15503	5.80837	3.05551				11.8152	5.71111	8.02508	4.82075	10.4983	3.89725
	4.7081	3.29925	5.36435	2.74741	6.46547				13.1372	11.3257	10.221	5.67838	5.59366	5.78802				34.4905	3.45832	4.15669	7.28823	10.9081	4.8495
	5.36902	2.34945	3.71921	2.26143	10.5133				9.64774	6.37929	8.77503	4.18585	4.60717	1.1512				2.74192	4.42666	4.77068	5.35582	4.41143	4.70804
	3.90718	2.62976	2.605	5.36154	1.08345				13.3755	3.35992	7.5403	5.05122	5.78847	10.3872				2.57136	5.1283	3.06006	8.13714	3.60547	6.34346
	4.37546	10.5475	3.4633	2.1726	5.87588				4.38785	6.44724	12.1924	6.17763	4.77017	6.46836				3.52129	3.28034	4.87319	3.18675	7.49467	15.5016
	5.07631	7.49038	8.68216	3.54199	3.587				7.90858	7.01718	9.06271	4.03286	10.2811	5.12767				2.72234	3.63115	14.6773	15.6325	16.7982	7.53566
	3.63103	7.82473	3.72044	6.67244	6.52372				1.62672	5.5916	5.78775	5.95506	3.09966	5.27162				4.13358	11.9505	7.01139	0.905367	7.21205	8.80477
	8.39187	10.5918	5.48554	9.3018	2.32987				5.18321	5.32962	5.90769	6.89555	5.59451	2.74302				3.87266	8.20715	5.24033	2.67825	2.50852	3.26002
	4.57054	5.72422	6.27963	5.85107	24.3833				12.0037	4.27656	4.69098	3.96818	4.21425	6.21928				4.7896	2.90088	4.61471	13.1987	5.68009	12.5376
	8.74116	6.94453	6.32916	5.18114	7.13802				8.47273	8.46125	5.63489	13.9567	14.6892	6.35104				7.0481	3.67499	8.46731	8.24804	5.30791	3.36225
	4.60426	13.0987	4.63567	5.76218	2.43939				5.98609	4.93166	5.43201	11.1239	5.17594	6.27861				2.96074	4.55769	5.76568	5.59438	13.314	5.88916
	4.59515	3.22463	6.77387	8.57673	5.17298				7.86927	4.18526	19.6334	3.47897	3.96086	3.19323				4.7633	3.21293	6.31022	3.95029	15.9037	5.27788
	4.8659	2.22818	4.65655	4.33387	1.79776				8.10956	15.5021	6.84643	4.16748	1.93952	12.582				2.44078	2.43157	6.93307	5.98019	4.87677	10.5636
	2.66577	2.74526	5.316	4.68059	3.44522				9.71216	6.18714	7.95646	6.19342	9.17188	7.12926				5.61797	1.98365	4.26992	5.77724	2.84739	6.60791
	3.67977	5.23478	4.4916	2.47006	4.94509				3.52502	3.0732	8.7855	8.75421	5.22893	8.25148				2.36511	2.03392	4.27173	4.34422	1.4252	8.88393
	21.1488	4.72669	2.91541	6.99337	7.5918				4.78381	11.8409	10.507	4.479	3.66766	4.10401				2.0824	3.13774	4.1547	3.06529	5.20959	4.68047
	6.21678	5.66221	8.6087	3.12071	5.11164				4.76926	5.90863	4.38504	5.49706	5.522	8.69261				1.88595	8.22976	2.48755	4.66573	7.79513	8.18925
	0.953862	5.73104	5.56318	4.3835	2.07812				4.77208	6.27359	4.17723	6.18386	9.01287	3.71163				24.9591	4.66638	2.79863	6.72482	6.17308	12.5137
	3.29024	11.176	6.04377	3.46708	40.8859				3.86562	2.87513	3.79699	5.45358	23.8199	4.28943				4.59817	9.79798	13.1868	13.642	16.0786	4.67808
	9.31633	4.42079	6.99806	3.76674	3.47655				5.86146	4.00134	10.6701	6.29778	7.11725	15.6244				5.58152	6.18257	4.53509	10.9308	11.3626	5.06514
	4.65205	4.27916	7.36149	13.9537	7.26839				9.15938	2.4392	8.46157	12.3962	13.041	2.88003				1.82317	4.69322	3.8584	6.66613	12.7151	8.79229
	4.96189	7.77955	10.1037	5.46153	16.4978				4.01071	4.01915	7.87964	7.25208	7.04659	2.95913				9.22365	7.08965	4.52145	15.7567	18.8446	9.80079
	4.22757	6.83867	3.70461	5.65834	6.14778				1.75342	2.52668	8.37274	6.35661	5.02737	3.83314				1.40422	8.40123	5.19185	11.4948	13.2221	7.61902
	5.60522	2.61464	3.3558	3.81781	3.28451				4.53614	4.79809	10.6382	14.4826	5.7231	6.37727				1.44808	6.36937	7.23302	6.13558	6.84477	6.05961
	9.69166	16.3096	4.4723	4.72627	4.14525				3.80244	1.62382	9.1785	7.02429	9.65906	4.30969				0.900549	4.51782	7.63074	5.73777	10.0386	2.20353
	4.17172	8.93314	2.30626	4.90358	3.50302				10.3775	8.1583	7.45613	4.60385	3.16133	7.48713				2.94959	5.53556	3.94843	7.84152	13.2093	2.5531
	3.08712	4.86376	3.85731	3.00573	4.07655				11.1607	9.35289	5.69576	1.99571	6.29274	9.93419				2.62692	5.54374	4.75708	7.10174	13.3887	12.457
	5.62805	5.35343	6.02824	5.62743	5.94468				5.7774	8.33417	5.16279	10.0557	7.25297	3.64675				3.14615	8.81928	4.75062	2.99226	27.5465	2.13706
	4.22811	5.2058	7.71968	3.37242	5.17141				9.52063	4.94361	13.9687	7.52152	2.89631	5.92665				1.50667	11.6	3.61417	10.2288	7.68056	2.77001
	7.92837	5.82179	6.47132	5.19403	3.04883				9.71522	14.1242	12.839	7.5016	3.31077	9.42021				4.67499	4.44433	6.44359	7.48676	10.0249	5.04636
	3.61355	3.66349	7.19828	4.15033	3.04055				5.89623	7.07187	8.8779	12.3883	6.06919	11.7192				3.62935	12.6816	4.07502	3.92666	4.59215	4.28535
	4.71466	5.39414	7.24151	5.34421	2.83134				11.8378	5.03718	17.2721	4.53298	5.12267	11.5223				1.86051	1.81814	3.75527	5.31762	8.1216	3.66826
	5.66367	4.06201	14.3157	2.46921	4.81422				1.11578	9.01488	11.425	12.0312	16.338	19.1543				2.62687	7.50621	6.07757	9.05668	6.95798	2.41338
	4.64705	8.74977	5.8705	4.24606	4.1945				2.92197	3.23793	5.88736	3.95533	14.7783	1.59552				1.60821	15.2159	6.16789	4.79017	7.47361	6.99265
	4.72765	3.7899	4.515	5.74451	6.9419				1.41498	3.75639	6.27583	4.11075	2.17537	1.25058				4.54747	6.8693	3.23168	10.2609	8.75281	11.0818
	5.90634	13.8518	3.14138	4.59205	3.18722				18.2959	4.3149	18.2932	15.3666	3.93916	8.79295				2.65305	6.36752	5.20058	15.7144	11.9754	2.86613
	13.2584	6.56864	3.44698	2.29476	6.0331				5.60889	4.13778	10.9784	6.8044	6.19811	6.57956				4.5453	5.58316	10.273	12.8577	10.8979	5.32948
	3.1238	12.7361	3.63575	2.9409	9.69918				13.1429	6.82279	13.4766	3.21653	4.71402	9.11968				6.28356	2.40712	13.8407	6.94911	9.83613	5.75372
	2.96691	3.97907	4.84497	4.16377	7.21813				6.9655	8.86493	26.7254	6.72658	4.48423	11.3255				3.55655	4.18345	4.96813	5.74667	9.417	2.4577
	1.90608	5.37634	6.16246	3.78628	12.6723				13.9136	6.51812	6.62753	5.46878	13.8801	6.78002				4.31471	6.63057	4.2186	5.8948	11.6804	5.62347
	3.81694	8.73948	3.52807	3.88097	12.5476				7.9073	4.42282	7.98103	4.47687	7.8517	13.0276				2.77309	4.94928	4.67195	6.24169	4.71588	6.23879
	3.59822	6.22182	4.61396	1.48175	4.14781				6.61012	8.58619	9.23763	20.1754	8.43246	7.55326				3.06899	7.19334	10.3124	9.40145	4.02845	9.19952
	1.58	10.8756	2.43344	2.08328	4.05841				9.60917	4.05692	2.33815	5.69342	8.08894	7.00081				4.23346	13.0377	5.8338	2.7021	6.47432	5.32566
	4.85605	8.22181	3.87104	4.98004	2.87037				5.78573	6.16782	2.97065	6.3786	4.45701	7.54011				3.55792	4.95285	5.79446	3.97422	6.503	5.25264
	1.88882	7.21812	8.90775	6.64994	3.78362				2.75501	5.45036	4.26242	10.6063	11.5395	8.43561				3.40848	8.04254	6.78448	5.04531	4.11737	4.09597
	4.81385	2.59748	1.49846	10.4342	10.485				6.50793	3.69506	3.74089	3.73329	9.89648	7.82256				3.52044	3.49707	3.98558	13.3686	16.9312	6.60122
	5.77086	3.26037	6.5601	5.52554	5.07021				3.07062	6.27961	26.0911	5.53658	2.80739	3.53218				3.16281	8.13738	5.48794	6.34074	7.57719	5.69903
	2.72531	4.58868	4.35793	4.8685	2.1694				6.66641	9.48553	3.43073	2.43608	8.74108	3.90757				1.59561	2.2749	6.52795	8.222	11.5803	6.91615
	5.89681	5.30461	6.49482	5.87595	2.18902				6.06854	12.5045	8.93378	14.333	6.67684	6.21328				3.26694	5.11814	4.16632	9.38329	12.5419	5.56512
	4.53026	4.0764	3.41432	7.03602	5.72772				11.7042	7.64975	6.57809	9.78287	5.75174	4.14005				2.49258	3.04221	6.07615	3.38775	7.27206	5.06053
	6.50992	6.12961	5.2789	5.78307	8.95298				8.04587	4.1346	15.7935	12.104	3.54579	5.61861				2.37667	5.85039	3.89689	5.32236	11.697	5.1355
	2.47649	6.30333	7.80865	4.83212	4.35828				8.78873	7.61572	6.49701	6.20208	3.76448	10.6668				2.17515	3.83043	3.27069	6.35734	13.3621	4.29844
	6.61863	10.1632	5.76133	9.02987	10.0125				3.86104	7.91987	4.52601	5.71905	3.59749	10.6022				2.89176	3.64598	5.76683	3.29518	8.67883	6.39442
	2.9997	8.15297	9.06852	3.42786	6.21369				12.4335	12.3281	9.4353	5.19439	6.37201	9.0059				4.00891	4.89274	3.45709	11.5621	4.62335	7.30183
	7.92614	5.37793	5.47778	6.38432	3.04053				2.19725	12.4116	6.71002	8.18982	4.55243	3.81475				2.07759	9.71095	3.67313	2.95375	5.75231	7.27002
	5.65106	6.31993	3.78889	3.76114	3.69123				5.20061	3.35129	8.07263	5.98534	13.8467	12.2765				4.73878	4.67581	3.89604	7.54172	7.61407	12.387
	3.21932	6.34485	4.99343	3.49693	4.33523				2.71108	9.45934	7.77494	5.95913	7.88608	14.7379				3.82788	10.6171	5.15261	4.39978	4.41036	11.6427
	5.11575	6.80556	6.36079	10.5032	4.75356				9.00284	13.5189	6.81226	16.6523	6.25494	5.98403				1.93245	3.37493	14.372	9.58261	11.5947	3.78105
	3.23408	11.8827	4.93836	3.19868	1.50928				3.43114	8.49587	10.122	6.24407	3.28588	14.6068				3.27526	8.89658	5.51333	4.72001	12.1504	7.14978
	5.16905	9.31879	3.78513	3.01648	2.81716				6.29429	6.03581	13.1961	9.37452	7.40801	24.7209				4.7632	5.09806	7.72345	10.1099	12.051	3.36783
	5.96788	9.0066	5.03649	4.2988	4.20543				5.68257	2.49056	4.03243	5.24041	5.29256	7.78287				3.55611	3.40957	6.29428	5.24959	3.88586	11.0613
	4.62444	3.42935	4.65006	2.64352	1.32737				17.9079	3.00093	4.16342	4.69072	3.37987	10.8748				3.22155	3.103	5.81857	4.52216	13.1118	6.31766
	4.07397	4.87739	3.2387	5.96966	2.7875				3.18727	12.9584	4.21845	2.7265	13.6794	5.08091				3.18554	7.80007	7.94688	6.40345	3.28529	4.99785
	2.12984	5.07777	2.3619	4.7631	1.27369				7.14675	7.25147	13.3979	7.84344	5.95279	3.16388				3.86443	2.58189	4.80331	5.80206	8.78766	6.16668
	7.81939	5.41906	4.77443	5.24768	1.56983				2.47112	9.35934	7.66872	3.87742	3.64578	7.61574				2.31525	5.85015	5.3863	3.33798	10.4326	5.58804
	4.67811	8.77595	13.5704	1.89287	6.70777				4.90583	4.22471	2.78208	3.63884	0.912205	2.64955				2.16045	2.47632	6.41863	3.34248	2.07258	5.19119
	3.25442	11.5904	3.68854	1.94166	3.89399				3.18874	3.92453	14.2363	12.1593	7.62586	5.02873				12.018	1.86192	7.94714	7.28871	1.37662	10.8649
	4.62546	7.70861	4.4109	3.01032	5.5768				17.4206	4.48069	7.86176	8.42185	10.4211	4.92521				4.25602	10.7185	11.2984	4.42885	12.5491	5.5397
	4.57037	12.6235	3.09323	4.41679	6.29349				4.46257	2.91294	4.08699	11.5698	3.48201	14.0075				8.35544	7.88263	7.99714	3.61902	1.78603	8.37216
	6.75774	3.03011	6.44922	3.9062	2.57259				4.88673	11.9971	7.43446	7.46122	6.9172	14.8427				3.53874	6.34167	1.61687	2.7554	3.78103	3.66658
	2.68628	13.9412	6.22063	4.8168	4.99843				8.30086	8.64026	3.48398	7.02672	3.85966	2.80386				5.36622	3.06581	8.81986	7.0327	11.9649	5.02393
	4.62152	6.9626	3.0261	6.43499	4.31842				8.06693	13.8609	15.2872	4.54736	9.28621	8.75697				2.48415	3.21493	6.16213	3.61218	8.71661	5.80025
	5.70527	4.0488	2.45979	4.9953	14.1231				10.4769	5.10337	14.1212	6.56693	3.07719	4.42272				1.2443	9.23	6.87353	15.9905	8.97418	7.217
	4.42105	4.80582	6.73385	3.86597	2.10092				2.4107	7.31921	5.72999	9.12591	22.6063	5.69517				3.09644	6.64246	10.4461	8.15664	4.55382	4.57179
	4.4483	3.48945	4.88026	6.96986	11.4721				5.62555	2.86408	6.16112	6.68504	7.2743	17.9814				2.48057	6.23657	17.2058	5.11462	12.2317	5.73989
	2.3304	6.24396	6.85198	6.00469	3.2031				3.45501	6.88068	4.00441	13.7191	9.90093	2.62408				4.44519	8.25544	6.62634	7.3737	9.99772	5.33237
	4.12036	9.78344	4.47395	5.44622	3.77637				5.31734	9.58597	9.09894	6.10515	4.80998	8.20347				0.798467	5.82755	7.61248	4.13599	10.2998	19.1207
	6.02123	9.34454	5.85698	8.33608	7.53747				4.86703	8.20316	6.41788	4.78369	4.92774	14.4889				2.2835	6.94796	4.48944	8.47618	6.87463	8.19747
	4.79387	2.36639	6.3837	2.70775	2.09065				9.35364	2.77639	7.89547	4.41318	5.9758	21.2889				3.05131	12.3623	4.5579	3.67192	5.83662	3.11675
	5.44518	3.72986	4.06095	6.0428	2.04285				3.88709	3.18989	6.3133	3.22359	7.29804	7.303				14.6018	2.09802	5.21086	5.427	3.23466	2.31022
	7.2137	4.66825	5.94036	3.61256	4.2483				6.77417	2.80759	6.34559	6.59828	4.77868	10.1545				5.81915	19.5372	11.8036	13.6381	2.35906	3.25286
	2.83746	5.78237	3.85624	8.37156	5.48072				6.19491	16.4163	14.1101	3.40291	9.59335	4.70042				4.47444	1.13376	7.1023	4.19534	11.7753	7.39966
	15.1648	4.88686	4.67066	16.5559	1.99014				5.20078	8.06276	6.02731	3.85195	2.49067	4.82218				9.98324	3.04848	7.84433	5.81925	14.5533	19.6801
	4.94284	6.91062	4.39087	8.02307	2.57082				6.15462	9.36389	4.86325	18.8451	3.73209	6.68312				2.54703	6.04802	7.12255	3.40276	3.98491	8.09291
	3.87406	2.39255	6.85112	3.3771	16.0525				6.36082	10.9659	7.28397	2.23283	12.0036	5.42519				4.38126	6.22268	5.73718	5.92957	0.97353	2.27617
	1.97078	4.65021	3.53852	15.2663	4.823				8.71211	2.98395	12.4986	2.61131	12.2106	12.5044				3.00504	3.99223	3.02543	2.59577	11.3356	3.57052
	12.5557	4.07928	13.5191	8.58438	3.55649				19.8745	5.66491	11.5923	3.79553	4.10013	5.00018				3.65967	4.11727	7.35424	2.11479	5.17575	4.07713
	5.21861	2.12388	3.07489	1.84905	4.46064				3.62554	4.89684	28.9426	5.80064	5.34272	12.2954				2.41127	4.57347	4.8054	8.47	4.30862	9.07873
	3.26512	10.3262	8.06564	3.98537	4.81353				8.01608	5.11958	7.86575	8.43954	5.03827	3.85933				2.73208	8.87355	6.98586	2.4037	11.8917	5.51898
	6.76026	5.86286	3.70598	4.88824	4.12291				13.4712	2.91322	9.37592	7.16623	3.05575	26.4982				2.54582	6.79698	4.39935	3.56101	9.20875	9.82175
	2.27611	9.69469	6.65334	3.39004	3.95187				7.04514	10.2943	15.4408	9.20568	9.03382	15.5599				5.01933	8.04767	14.5545	1.42731	3.24341	2.89641
	4.59222	15.8655	4.18892	8.43089	4.23892				10.0053	3.24142	8.26746	7.54788	17.0349	2.28432				2.83592	11.1095	8.26386	14.0441	9.00869	4.90903
	5.9588	11.8132	4.04724	6.75375	2.03192				2.69222	3.59904	6.40302	12.7728	7.5981	6.13829				3.76207	11.3218	8.46506	6.73163	4.57302	5.36723
	6.00445	3.72876	5.75325	4.83895	5.65634				5.70453	3.59836	4.23933	7.94288	8.65081	5.19623				1.07343	3.50217	2.89945	6.36054	11.9793	2.79428
	4.92305	7.91998	5.36409	5.46184	2.73546				11.2165	3.56778	6.56254	4.38864	4.03299	10.2927				27.2276	8.48932	3.52583	8.40449	8.61522	9.06036
	5.9296	5.92174	3.89671	3.08584	4.86402				2.59819	2.29608	7.29893	6.56138	7.78297	6.32864				3.54255	8.17533	3.62254	5.64915	6.55472	3.50841
	3.73944	8.3657	2.31458	10.4561	2.56942				6.63076	10.1501	7.16818	14.2857	7.62578	10.0381				4.41927	6.20774	6.76411	9.8091	5.23369	4.67762
	3.98886	6.14665	5.59444	2.55937	16.0902				5.6511	3.51538	4.34628	4.99351	6.89389	9.24671				3.40986	3.99799	11.393	5.25584	6.98713	5.28611
	4.34746	2.88213	7.96892	3.64412	4.20204				4.38648	4.19389	6.34368	10.5012	4.46796	11.6929				3.27362	3.69019	3.76647	6.46003	6.54331	9.91858
	5.92614	5.5519	9.69983	3.8896	3.31687				1.00326	2.72063	5.04612	3.74299	4.81317	13.0339				3.49703	4.3864	5.81841	4.19101	3.44237	7.00308
	4.75738	2.38544	7.6609	7.7279	5.08332				10.0124	6.87631	17.2154	6.37721	6.77033	5.52293				3.68021	2.85786	6.78673	6.32869	6.93427	3.36969
	3.72113	3.74107	6.34564	7.38698	4.78539				24.9186	5.18923	5.49909	6.15555	7.46352	12.8371				2.4245	16.936	5.70856	10.7731	10.885	5.2277
	3.27514	2.35852	3.53331	8.07327	3.38426				7.21319	6.29988	7.08357	3.17095	3.65365	8.12465				3.9064	3.19547	5.92741	5.0881	4.24067	7.01965
	10.8272	2.84393	2.85811	11.8752	4.82408				5.30616	5.27445	13.7059	2.65414	8.66118	7.33265				3.43231	3.45527	4.95279	12.3347	8.98749	12.3414
	15.1863	7.27879	3.90408	12.3923	4.09329				16.8611	7.96669	6.38995	18.2126	4.72677	3.92283				6.40207	5.21738	7.71206	5.78103	6.2531	9.35012
	3.3179	8.65418	4.88155	3.22071	4.65949				2.68219	4.94602	8.21442	4.15626	3.77095	7.94447				6.86448	4.45462	4.43952	3.25994	6.35369	1.79816
[truncated: 1,831 more rows]

## Sheet: Polymerization V409A
03.02.22									03.09.22									03.23.22
[truncated: 2,520 more rows]

## Sheet: Lifetime WT
03.02.22							03.09.22									03.23.22
[truncated: 2,723 more rows]

## Sheet: Lifetime V409I
03.02.22									03.09.22									03.23.22
[truncated: 2,655 more rows]

[truncated: 1 more sheets: Lifetime V409A]
