# Supplementary material for: TUBA1A tubulinopathy mutants disrupt neuron morphogenesis and override XMAP215/Stu2 regulation of microtubule dynamics
Source: eLife. 2022 May 5;11:e76189. doi: 10.7554/eLife.76189 (PMC9236607; doi:10.7554/eLife.76189)
Supplement: Figure 4—figure supplement 1—source data 1. [file elife-76189-fig4-figsupp1-data1.xlsx]

## Sheet: Rep 1 Plate 1 - Sheet1
Software Version	3.10.06
Experiment File Path:	C:\Users\Moore Lab Plate Read\Desktop\KJH\081821_LGA\081821.xpt
Protocol File Path:	C:\Users\Moore Lab Plate Read\Desktop\Protocols\Liquid Growth Assay Modified CF.prt
Plate Number	Plate 1
Date	2021-08-18
Time	14:33:45
Reader Type:	Epoch 2
Reader Serial Number:	200916F
Reading Type	Reader
Procedure Details
Plate Type	96 WELL PLATE (Use plate lid)
Well Selection	Runtime
Eject plate on completion
Set Temperature	Setpoint 30°C, Gradient 0 °C
	Preheat before moving to next step
Read	Absorbance Endpoint
	Full Plate
	Wavelengths: 600
	Read Speed: Normal, Delay: 100 msec, Measurements/Data Point: 8
Start Kinetic	Runtime 36:00:00 (HH:MM:SS), Interval 0:05:00, 433 Reads
Shake	Orbital: Continuous
	Frequency: 559 cpm (1 mm)
Read	Absorbance Endpoint
	Full Plate
	Wavelengths: 600
	Read Speed: Normal, Delay: 100 msec, Measurements/Data Point: 8
End Kinetic
Plate In
Layout
		1	2	3	4	5	6	7	8	9	10	11	12
	A	SPL1	SPL9	SPL17	SPL25	SPL33	SPL41	SPL49	SPL57	SPL65	SPL73	SPL81	SPL89	Well ID
	B	SPL2	SPL10	SPL18	SPL26	SPL34	SPL42	SPL50	SPL58	SPL66	SPL74	SPL82	SPL90	Well ID
	C	SPL3	SPL11	SPL19	SPL27	SPL35	SPL43	SPL51	SPL59	SPL67	SPL75	SPL83	SPL91	Well ID
	D	SPL4	SPL12	SPL20	SPL28	SPL36	SPL44	SPL52	SPL60	SPL68	SPL76	SPL84	SPL92	Well ID
	E	SPL5	SPL13	SPL21	SPL29	SPL37	SPL45	SPL53	SPL61	SPL69	SPL77	SPL85	SPL93	Well ID
	F	SPL6	SPL14	SPL22	SPL30	SPL38	SPL46	SPL54	SPL62	SPL70	SPL78	SPL86	SPL94	Well ID
	G	SPL7	SPL15	SPL23	SPL31	SPL39	SPL47	SPL55	SPL63	SPL71	SPL79	SPL87	SPL95	Well ID
	H	SPL8	SPL16	SPL24	SPL32	SPL40	SPL48	SPL56	SPL64	SPL72	SPL80	SPL88	SPL96	Well ID
Results
Actual Temperature:	30
		1	2	3	4	5	6	7	8	9	10	11	12
	A	0.092	0.092	0.094	0.093	0.092	0.09	0.09	0.093	0.092	0.089	0.092	0.089	Read 1:600
	B	0.111	0.112	0.111	0.112	0.11	0.11	0.111	0.113	0.111	0.111	0.108	0.11	Read 1:600
	C	0.109	0.11	0.112	0.111	0.109	0.109	0.109	0.112	0.11	0.11	0.108	0.108	Read 1:600
	D	0.108	0.109	0.109	0.112	0.125	0.108	0.11	0.109	0.108	0.108	0.107	0.119	Read 1:600
	E	0.11	0.11	0.109	0.11	0.11	0.113	0.109	0.11	0.11	0.109	0.111	0.112	Read 1:600
	F	0.112	0.112	0.112	0.111	0.11	0.111	0.111	0.113	0.115	0.112	0.115	0.112	Read 1:600
	G	0.108	0.108	0.11	0.112	0.109	0.11	0.111	0.111	0.111	0.112	0.109	0.111	Read 1:600
	H	0.09	0.092	0.091	0.09	0.091	0.09	0.089	0.089	0.09	0.089	0.089	0.09	Read 1:600
Read 2:600
	Time	00:04:16	00:09:16	00:14:16	00:19:16	00:24:16	00:29:16	00:34:16	00:39:16	00:44:16	00:49:16	00:54:16	00:59:16	01:04:16	01:09:16	01:14:16	01:19:16	01:24:16	01:29:16	01:34:16	01:39:16	01:44:16	01:49:16	01:54:16	01:59:16	02:04:16	02:09:16	02:14:16	02:19:16	02:24:16	02:29:16	02:34:16	02:39:16	02:44:16	02:49:16	02:54:16	02:59:16	03:04:16	03:09:16	03:14:16	03:19:16	03:24:16	03:29:16	03:34:16	03:39:16	03:44:16	03:49:16	03:54:16	03:59:16
	T° Read 2:600	30	30	30	30	30	30	30	30	30	30	30.1	30.1	30	30.1	30	30.1	30.1	30.1	30.1	30.1	30	30.1	30.1	30.1	30.1	30.1	30.1	30.1	30.1	30.1	30.1	30.1	30.1	30.1	30.1	30.1	30.1	30	30.1	30.1	30.1	30.1	30.1	30.1	30.1	30.1	30.1	30.1
	A1	0.091	0.091	0.091	0.091	0.091	0.091	0.091	0.091	0.091	0.091	0.091	0.091	0.091	0.091	0.091	0.091	0.091	0.091	0.091	0.091	0.091	0.091	0.091	0.091	0.091	0.091	0.091	0.091	0.091	0.091	0.091	0.091	0.091	0.091	0.091	0.091	0.091	0.091	0.091	0.091	0.091	0.091	0.091	0.091	0.091	0.091	0.091	0.091
	A2	0.092	0.092	0.092	0.092	0.092	0.092	0.092	0.092	0.092	0.092	0.092	0.092	0.092	0.092	0.092	0.092	0.092	0.092	0.092	0.092	0.092	0.092	0.092	0.092	0.092	0.092	0.092	0.092	0.092	0.092	0.092	0.092	0.092	0.092	0.092	0.092	0.092	0.092	0.092	0.092	0.092	0.092	0.092	0.092	0.092	0.092	0.092	0.092
	A3	0.093	0.093	0.093	0.093	0.093	0.093	0.093	0.093	0.093	0.093	0.093	0.093	0.093	0.093	0.093	0.093	0.093	0.093	0.093	0.093	0.093	0.093	0.093	0.093	0.093	0.093	0.093	0.093	0.093	0.093	0.093	0.093	0.093	0.093	0.093	0.093	0.093	0.093	0.093	0.093	0.093	0.093	0.093	0.093	0.093	0.093	0.093	0.093
	A4	0.092	0.092	0.092	0.092	0.092	0.092	0.092	0.092	0.092	0.092	0.092	0.092	0.092	0.092	0.092	0.092	0.092	0.092	0.092	0.092	0.092	0.092	0.092	0.092	0.092	0.092	0.092	0.092	0.092	0.092	0.092	0.092	0.092	0.092	0.092	0.092	0.092	0.092	0.092	0.092	0.092	0.092	0.092	0.092	0.092	0.092	0.092	0.092
	A5	0.092	0.091	0.092	0.091	0.091	0.091	0.091	0.091	0.091	0.091	0.091	0.091	0.091	0.091	0.091	0.091	0.091	0.091	0.091	0.091	0.091	0.091	0.091	0.091	0.091	0.091	0.091	0.091	0.091	0.091	0.091	0.091	0.091	0.091	0.091	0.091	0.091	0.091	0.091	0.091	0.091	0.091	0.092	0.091	0.091	0.091	0.091	0.091
	A6	0.09	0.09	0.09	0.09	0.09	0.09	0.09	0.09	0.09	0.09	0.09	0.09	0.09	0.09	0.09	0.09	0.09	0.09	0.09	0.09	0.09	0.09	0.09	0.09	0.09	0.09	0.09	0.09	0.09	0.09	0.09	0.09	0.09	0.09	0.09	0.09	0.09	0.09	0.09	0.09	0.09	0.09	0.09	0.09	0.09	0.09	0.09	0.09
	A7	0.09	0.09	0.09	0.09	0.09	0.09	0.09	0.09	0.09	0.09	0.09	0.09	0.09	0.09	0.09	0.09	0.09	0.09	0.09	0.09	0.09	0.09	0.09	0.09	0.09	0.09	0.09	0.09	0.09	0.09	0.09	0.09	0.09	0.09	0.09	0.09	0.09	0.09	0.09	0.09	0.09	0.09	0.09	0.09	0.09	0.09	0.09	0.09
	A8	0.092	0.092	0.092	0.092	0.092	0.092	0.092	0.093	0.093	0.093	0.093	0.093	0.093	0.093	0.093	0.093	0.093	0.093	0.093	0.093	0.093	0.093	0.093	0.093	0.093	0.093	0.093	0.093	0.093	0.093	0.093	0.093	0.093	0.093	0.093	0.093	0.093	0.093	0.093	0.093	0.093	0.093	0.094	0.094	0.093	0.093	0.094	0.094
	A9	0.091	0.091	0.091	0.091	0.091	0.091	0.091	0.091	0.091	0.091	0.091	0.091	0.091	0.091	0.091	0.091	0.091	0.091	0.091	0.091	0.091	0.091	0.091	0.091	0.091	0.091	0.091	0.091	0.091	0.091	0.091	0.091	0.091	0.091	0.091	0.091	0.091	0.091	0.091	0.091	0.091	0.091	0.091	0.091	0.091	0.091	0.091	0.091
	A10	0.089	0.089	0.089	0.088	0.088	0.088	0.088	0.088	0.088	0.089	0.088	0.088	0.088	0.088	0.088	0.088	0.088	0.089	0.088	0.088	0.088	0.089	0.088	0.089	0.088	0.088	0.089	0.088	0.088	0.088	0.088	0.088	0.088	0.089	0.088	0.088	0.088	0.088	0.089	0.088	0.088	0.088	0.089	0.089	0.088	0.089	0.089	0.088
	A11	0.091	0.091	0.091	0.091	0.091	0.091	0.091	0.091	0.091	0.091	0.091	0.091	0.091	0.091	0.091	0.091	0.091	0.091	0.091	0.091	0.091	0.091	0.091	0.091	0.091	0.091	0.091	0.091	0.091	0.091	0.091	0.091	0.091	0.091	0.091	0.091	0.091	0.091	0.091	0.091	0.091	0.091	0.091	0.091	0.091	0.091	0.091	0.091
	A12	0.089	0.089	0.089	0.089	0.089	0.089	0.089	0.089	0.089	0.089	0.089	0.089	0.089	0.089	0.089	0.089	0.089	0.089	0.089	0.089	0.089	0.089	0.089	0.089	0.089	0.089	0.089	0.089	0.089	0.089	0.089	0.089	0.089	0.089	0.089	0.089	0.089	0.089	0.089	0.089	0.089	0.089	0.089	0.089	0.089	0.089	0.089	0.089
	B1	0.111	0.11	0.11	0.11	0.11	0.11	0.11	0.11	0.11	0.11	0.109	0.11	0.11	0.11	0.11	0.111	0.111	0.111	0.111	0.111	0.111	0.111	0.112	0.112	0.112	0.113	0.113	0.113	0.114	0.114	0.114	0.115	0.115	0.116	0.116	0.117	0.118	0.118	0.119	0.12	0.12	0.121	0.122	0.123	0.124	0.125	0.126	0.127
	B2	0.111	0.111	0.111	0.111	0.111	0.111	0.111	0.111	0.111	0.11	0.111	0.111	0.111	0.111	0.111	0.111	0.111	0.111	0.112	0.112	0.112	0.112	0.112	0.112	0.113	0.113	0.113	0.114	0.114	0.114	0.115	0.115	0.116	0.116	0.117	0.117	0.117	0.118	0.119	0.119	0.12	0.121	0.122	0.123	0.123	0.124	0.125	0.126
	B3	0.11	0.109	0.109	0.109	0.11	0.11	0.109	0.109	0.109	0.109	0.109	0.109	0.109	0.109	0.109	0.109	0.11	0.11	0.11	0.11	0.11	0.111	0.111	0.111	0.111	0.111	0.112	0.112	0.112	0.113	0.113	0.114	0.114	0.114	0.115	0.115	0.116	0.116	0.117	0.118	0.118	0.119	0.12	0.12	0.121	0.122	0.123	0.125
	B4	0.11	0.11	0.11	0.11	0.11	0.11	0.11	0.11	0.109	0.109	0.109	0.109	0.11	0.11	0.11	0.11	0.11	0.11	0.11	0.11	0.11	0.111	0.111	0.111	0.111	0.111	0.112	0.112	0.112	0.113	0.113	0.113	0.114	0.115	0.115	0.115	0.116	0.117	0.117	0.118	0.118	0.119	0.12	0.121	0.121	0.122	0.123	0.124
	B5	0.11	0.109	0.11	0.11	0.11	0.109	0.109	0.109	0.109	0.109	0.109	0.11	0.11	0.11	0.11	0.11	0.11	0.11	0.11	0.11	0.111	0.111	0.111	0.111	0.111	0.112	0.112	0.112	0.113	0.113	0.113	0.114	0.114	0.115	0.115	0.116	0.116	0.117	0.117	0.118	0.118	0.119	0.12	0.121	0.122	0.123	0.123	0.124
	B6	0.109	0.109	0.109	0.109	0.109	0.109	0.109	0.109	0.108	0.109	0.109	0.109	0.109	0.109	0.109	0.109	0.109	0.11	0.11	0.11	0.11	0.11	0.11	0.11	0.111	0.111	0.111	0.112	0.112	0.112	0.113	0.113	0.113	0.114	0.114	0.115	0.115	0.116	0.116	0.117	0.117	0.118	0.119	0.12	0.12	0.121	0.122	0.123
	B7	0.11	0.109	0.11	0.109	0.109	0.109	0.109	0.109	0.108	0.108	0.108	0.109	0.109	0.109	0.109	0.109	0.109	0.109	0.109	0.11	0.11	0.11	0.11	0.11	0.111	0.111	0.111	0.111	0.112	0.112	0.112	0.113	0.113	0.113	0.114	0.115	0.115	0.116	0.116	0.117	0.117	0.118	0.119	0.12	0.12	0.121	0.122	0.123
	B8	0.111	0.11	0.11	0.11	0.11	0.11	0.109	0.109	0.109	0.109	0.109	0.109	0.109	0.109	0.109	0.109	0.108	0.108	0.108	0.108	0.108	0.109	0.109	0.109	0.111	0.109	0.11	0.11	0.11	0.111	0.111	0.111	0.111	0.112	0.112	0.113	0.113	0.113	0.114	0.115	0.115	0.115	0.116	0.117	0.117	0.118	0.12	0.119
	B9	0.11	0.109	0.109	0.109	0.109	0.109	0.108	0.108	0.108	0.108	0.108	0.108	0.108	0.108	0.108	0.108	0.108	0.108	0.108	0.108	0.112	0.109	0.109	0.109	0.115	0.11	0.11	0.11	0.11	0.116	0.111	0.111	0.112	0.116	0.113	0.117	0.113	0.114	0.114	0.119	0.115	0.116	0.117	0.121	0.118	0.119	0.125	0.121
	B10	0.11	0.11	0.11	0.11	0.109	0.11	0.109	0.109	0.109	0.11	0.109	0.109	0.109	0.11	0.109	0.11	0.109	0.11	0.11	0.11	0.116	0.11	0.11	0.11	0.118	0.11	0.111	0.111	0.111	0.118	0.111	0.112	0.112	0.118	0.113	0.12	0.113	0.114	0.114	0.122	0.115	0.116	0.116	0.124	0.118	0.118	0.126	0.12
	B11	0.108	0.109	0.109	0.109	0.109	0.109	0.109	0.108	0.108	0.108	0.108	0.107	0.108	0.108	0.107	0.108	0.107	0.108	0.107	0.107	0.118	0.108	0.108	0.109	0.119	0.108	0.111	0.108	0.11	0.12	0.11	0.11	0.11	0.119	0.111	0.121	0.111	0.116	0.113	0.123	0.113	0.113	0.114	0.124	0.118	0.116	0.127	0.121
	B12	0.108	0.108	0.108	0.108	0.108	0.107	0.107	0.107	0.107	0.107	0.106	0.106	0.107	0.106	0.106	0.106	0.106	0.106	0.106	0.106	0.117	0.106	0.106	0.107	0.118	0.106	0.11	0.106	0.107	0.118	0.106	0.108	0.107	0.116	0.108	0.118	0.108	0.108	0.109	0.119	0.109	0.11	0.11	0.118	0.111	0.111	0.12	0.112
	C1	0.107	0.107	0.107	0.107	0.107	0.107	0.107	0.107	0.107	0.107	0.107	0.107	0.107	0.107	0.107	0.107	0.108	0.108	0.108	0.108	0.108	0.109	0.109	0.109	0.109	0.11	0.11	0.11	0.111	0.111	0.112	0.112	0.112	0.113	0.113	0.114	0.114	0.115	0.116	0.116	0.117	0.118	0.119	0.12	0.12	0.121	0.122	0.123
	C2	0.11	0.109	0.11	0.11	0.11	0.11	0.109	0.109	0.109	0.109	0.109	0.109	0.109	0.11	0.11	0.11	0.11	0.11	0.11	0.111	0.111	0.111	0.111	0.111	0.112	0.112	0.112	0.112	0.113	0.113	0.114	0.114	0.114	0.115	0.115	0.116	0.117	0.117	0.118	0.118	0.119	0.12	0.121	0.122	0.122	0.123	0.124	0.125
	C3	0.111	0.11	0.11	0.111	0.11	0.11	0.11	0.11	0.11	0.11	0.109	0.109	0.109	0.11	0.109	0.11	0.11	0.11	0.11	0.11	0.11	0.11	0.11	0.11	0.11	0.111	0.111	0.111	0.111	0.112	0.112	0.112	0.113	0.113	0.113	0.114	0.114	0.115	0.115	0.116	0.116	0.117	0.118	0.118	0.119	0.12	0.121	0.121
	C4	0.109	0.109	0.11	0.11	0.11	0.11	0.109	0.109	0.109	0.109	0.109	0.109	0.109	0.109	0.109	0.109	0.109	0.109	0.109	0.11	0.11	0.11	0.11	0.11	0.11	0.11	0.111	0.111	0.111	0.112	0.112	0.112	0.113	0.113	0.113	0.114	0.114	0.115	0.115	0.116	0.117	0.117	0.118	0.119	0.119	0.12	0.121	0.122
	C5	0.108	0.108	0.108	0.108	0.108	0.108	0.107	0.107	0.107	0.107	0.107	0.107	0.107	0.107	0.107	0.107	0.108	0.108	0.108	0.108	0.108	0.108	0.108	0.109	0.109	0.109	0.109	0.11	0.11	0.11	0.111	0.111	0.111	0.112	0.112	0.113	0.113	0.114	0.114	0.115	0.115	0.116	0.117	0.117	0.118	0.119	0.12	0.121
	C6	0.108	0.108	0.108	0.108	0.108	0.108	0.107	0.107	0.107	0.107	0.107	0.107	0.107	0.108	0.108	0.108	0.108	0.108	0.108	0.108	0.108	0.109	0.109	0.109	0.109	0.11	0.11	0.11	0.111	0.111	0.111	0.112	0.112	0.113	0.113	0.114	0.114	0.115	0.115	0.116	0.117	0.118	0.119	0.119	0.12	0.121	0.122	0.123
	C7	0.108	0.108	0.107	0.108	0.108	0.107	0.107	0.107	0.107	0.107	0.107	0.107	0.107	0.107	0.107	0.107	0.108	0.108	0.108	0.108	0.108	0.108	0.108	0.108	0.109	0.108	0.108	0.109	0.109	0.11	0.11	0.11	0.11	0.111	0.111	0.111	0.111	0.112	0.112	0.113	0.113	0.114	0.115	0.115	0.115	0.116	0.119	0.117
	C8	0.111	0.11	0.11	0.11	0.11	0.11	0.11	0.11	0.11	0.11	0.11	0.109	0.11	0.11	0.11	0.11	0.11	0.11	0.11	0.11	0.11	0.11	0.11	0.111	0.112	0.111	0.111	0.111	0.112	0.113	0.112	0.112	0.112	0.113	0.113	0.115	0.114	0.114	0.115	0.116	0.116	0.116	0.116	0.118	0.117	0.118	0.121	0.12
	C9	0.109	0.109	0.108	0.108	0.108	0.108	0.108	0.108	0.108	0.108	0.108	0.107	0.108	0.108	0.108	0.108	0.108	0.108	0.108	0.108	0.111	0.108	0.108	0.108	0.113	0.108	0.109	0.109	0.109	0.113	0.109	0.11	0.11	0.113	0.111	0.115	0.111	0.112	0.113	0.117	0.113	0.114	0.115	0.118	0.115	0.116	0.121	0.118
	C10	0.109	0.108	0.108	0.108	0.108	0.108	0.107	0.108	0.107	0.107	0.107	0.107	0.107	0.107	0.107	0.107	0.107	0.107	0.107	0.107	0.113	0.107	0.107	0.108	0.114	0.108	0.109	0.108	0.109	0.115	0.109	0.109	0.11	0.115	0.111	0.117	0.111	0.112	0.112	0.118	0.113	0.113	0.115	0.12	0.115	0.116	0.123	0.119
	C11	0.108	0.107	0.107	0.107	0.107	0.107	0.107	0.106	0.106	0.106	0.106	0.106	0.106	0.106	0.106	0.107	0.106	0.107	0.106	0.107	0.115	0.107	0.107	0.109	0.116	0.11	0.109	0.108	0.11	0.117	0.11	0.11	0.11	0.117	0.112	0.118	0.111	0.115	0.113	0.12	0.113	0.113	0.115	0.122	0.116	0.117	0.125	0.123
	C12	0.107	0.107	0.107	0.107	0.107	0.107	0.107	0.107	0.107	0.107	0.107	0.107	0.106	0.107	0.106	0.106	0.106	0.106	0.106	0.106	0.106	0.106	0.106	0.107	0.106	0.106	0.107	0.107	0.107	0.107	0.107	0.107	0.108	0.108	0.109	0.109	0.109	0.109	0.11	0.11	0.11	0.111	0.112	0.112	0.112	0.113	0.113	0.115
	D1	0.107	0.107	0.107	0.107	0.107	0.107	0.107	0.107	0.106	0.106	0.106	0.107	0.107	0.107	0.107	0.107	0.108	0.108	0.108	0.108	0.108	0.109	0.109	0.109	0.109	0.11	0.11	0.11	0.111	0.111	0.111	0.112	0.112	0.113	0.113	0.114	0.114	0.115	0.115	0.116	0.116	0.117	0.118	0.118	0.119	0.12	0.121	0.122
	D2	0.108	0.108	0.109	0.109	0.109	0.109	0.108	0.108	0.108	0.108	0.108	0.108	0.108	0.109	0.109	0.109	0.109	0.109	0.109	0.109	0.109	0.109	0.109	0.109	0.11	0.11	0.11	0.11	0.11	0.111	0.111	0.111	0.111	0.112	0.112	0.112	0.113	0.113	0.114	0.114	0.115	0.115	0.116	0.116	0.117	0.118	0.118	0.119
	D3	0.108	0.108	0.108	0.108	0.108	0.108	0.108	0.108	0.108	0.108	0.108	0.108	0.108	0.108	0.108	0.108	0.108	0.109	0.109	0.109	0.109	0.11	0.109	0.109	0.109	0.11	0.11	0.11	0.11	0.11	0.111	0.111	0.111	0.112	0.112	0.112	0.113	0.113	0.114	0.114	0.115	0.115	0.116	0.117	0.117	0.117	0.118	0.119
	D4	0.111	0.11	0.111	0.111	0.111	0.111	0.111	0.11	0.11	0.11	0.11	0.11	0.11	0.11	0.11	0.111	0.111	0.111	0.111	0.111	0.111	0.111	0.112	0.112	0.112	0.112	0.113	0.113	0.113	0.113	0.114	0.114	0.115	0.115	0.115	0.116	0.116	0.117	0.117	0.118	0.118	0.119	0.12	0.12	0.121	0.121	0.122	0.123
	D5	0.126	0.115	0.108	0.116	0.109	0.107	0.107	0.107	0.107	0.107	0.107	0.107	0.107	0.107	0.107	0.107	0.108	0.107	0.108	0.108	0.108	0.116	0.108	0.108	0.108	0.108	0.109	0.109	0.109	0.11	0.11	0.11	0.111	0.111	0.111	0.112	0.112	0.112	0.113	0.114	0.114	0.115	0.115	0.116	0.116	0.117	0.118	0.118
	D6	0.107	0.107	0.107	0.107	0.107	0.107	0.106	0.106	0.106	0.106	0.106	0.106	0.106	0.106	0.106	0.106	0.106	0.107	0.107	0.107	0.107	0.107	0.107	0.107	0.108	0.108	0.108	0.108	0.109	0.109	0.109	0.109	0.11	0.11	0.111	0.111	0.111	0.112	0.112	0.113	0.113	0.114	0.114	0.115	0.115	0.116	0.117	0.117
	D7	0.109	0.108	0.109	0.109	0.109	0.108	0.108	0.108	0.108	0.108	0.108	0.108	0.108	0.108	0.108	0.108	0.109	0.108	0.108	0.108	0.109	0.109	0.109	0.109	0.11	0.109	0.11	0.11	0.11	0.11	0.111	0.111	0.111	0.111	0.112	0.112	0.113	0.113	0.113	0.114	0.114	0.115	0.116	0.116	0.116	0.117	0.119	0.119
	D8	0.107	0.107	0.107	0.107	0.107	0.107	0.107	0.107	0.106	0.106	0.106	0.106	0.106	0.106	0.107	0.107	0.107	0.107	0.107	0.107	0.107	0.107	0.108	0.108	0.108	0.108	0.108	0.108	0.109	0.109	0.109	0.11	0.11	0.111	0.111	0.111	0.111	0.112	0.113	0.113	0.113	0.114	0.115	0.115	0.115	0.116	0.119	0.118
	D9	0.107	0.107	0.108	0.108	0.107	0.107	0.109	0.107	0.107	0.107	0.107	0.107	0.107	0.107	0.107	0.107	0.107	0.107	0.107	0.108	0.108	0.108	0.108	0.109	0.112	0.109	0.109	0.109	0.11	0.113	0.11	0.11	0.111	0.113	0.112	0.114	0.112	0.113	0.114	0.116	0.114	0.115	0.116	0.119	0.117	0.118	0.123	0.119
	D10	0.107	0.107	0.106	0.107	0.107	0.107	0.106	0.106	0.106	0.106	0.106	0.106	0.106	0.106	0.106	0.107	0.107	0.107	0.107	0.108	0.11	0.108	0.108	0.108	0.113	0.108	0.109	0.109	0.11	0.114	0.11	0.11	0.111	0.114	0.112	0.115	0.112	0.113	0.114	0.117	0.114	0.115	0.116	0.12	0.117	0.118	0.123	0.12
	D11	0.107	0.107	0.107	0.107	0.107	0.107	0.107	0.106	0.106	0.106	0.106	0.106	0.106	0.106	0.106	0.107	0.107	0.107	0.107	0.107	0.113	0.107	0.107	0.108	0.114	0.108	0.108	0.108	0.109	0.115	0.109	0.11	0.11	0.115	0.112	0.116	0.111	0.112	0.113	0.118	0.113	0.114	0.115	0.121	0.116	0.117	0.124	0.119
	D12	0.126	0.129	0.135	0.113	0.109	0.108	0.108	0.107	0.109	0.107	0.107	0.107	0.107	0.108	0.107	0.107	0.107	0.108	0.109	0.107	0.107	0.107	0.107	0.108	0.108	0.108	0.108	0.142	0.109	0.11	0.112	0.142	0.109	0.109	0.118	0.138	0.133	0.111	0.115	0.111	0.112	0.112	0.113	0.113	0.114	0.114	0.116	0.116
	E1	0.112	0.109	0.109	0.109	0.108	0.108	0.108	0.108	0.108	0.108	0.108	0.108	0.108	0.108	0.108	0.108	0.109	0.109	0.109	0.109	0.109	0.109	0.109	0.11	0.11	0.11	0.11	0.11	0.111	0.111	0.111	0.112	0.112	0.113	0.113	0.113	0.114	0.114	0.115	0.115	0.116	0.116	0.117	0.118	0.118	0.119	0.12	0.121
	E2	0.108	0.109	0.109	0.109	0.109	0.109	0.109	0.109	0.109	0.109	0.109	0.109	0.109	0.109	0.109	0.109	0.109	0.109	0.11	0.11	0.11	0.11	0.11	0.11	0.111	0.111	0.111	0.112	0.112	0.112	0.113	0.113	0.114	0.114	0.115	0.115	0.116	0.116	0.117	0.118	0.118	0.119	0.12	0.121	0.122	0.123	0.124	0.125
	E3	0.109	0.108	0.108	0.108	0.108	0.108	0.108	0.108	0.107	0.107	0.108	0.107	0.108	0.108	0.108	0.108	0.108	0.108	0.108	0.109	0.109	0.109	0.109	0.109	0.109	0.11	0.11	0.11	0.111	0.111	0.112	0.112	0.112	0.113	0.113	0.113	0.114	0.115	0.115	0.116	0.116	0.117	0.118	0.118	0.119	0.12	0.121	0.122
	E4	0.109	0.109	0.109	0.109	0.109	0.109	0.109	0.108	0.108	0.108	0.108	0.108	0.108	0.109	0.108	0.109	0.109	0.109	0.109	0.109	0.109	0.109	0.11	0.11	0.11	0.11	0.111	0.111	0.111	0.111	0.112	0.112	0.113	0.113	0.113	0.114	0.115	0.115	0.116	0.116	0.117	0.117	0.118	0.119	0.12	0.121	0.122	0.123
	E5	0.109	0.109	0.109	0.108	0.109	0.108	0.108	0.108	0.108	0.108	0.108	0.108	0.108	0.108	0.108	0.108	0.108	0.108	0.108	0.109	0.109	0.109	0.109	0.109	0.109	0.109	0.11	0.11	0.11	0.111	0.111	0.111	0.112	0.112	0.113	0.113	0.114	0.114	0.115	0.115	0.116	0.117	0.117	0.118	0.119	0.119	0.12	0.121
	E6	0.112	0.112	0.112	0.112	0.112	0.112	0.112	0.112	0.111	0.111	0.111	0.111	0.111	0.111	0.111	0.111	0.111	0.112	0.111	0.111	0.112	0.112	0.112	0.112	0.112	0.112	0.112	0.113	0.113	0.113	0.113	0.114	0.114	0.114	0.115	0.115	0.115	0.116	0.116	0.117	0.117	0.118	0.119	0.119	0.12	0.12	0.121	0.122
	E7	0.109	0.108	0.109	0.108	0.108	0.109	0.108	0.108	0.108	0.108	0.108	0.108	0.108	0.108	0.108	0.108	0.108	0.108	0.108	0.108	0.108	0.109	0.109	0.109	0.109	0.109	0.11	0.11	0.11	0.111	0.111	0.111	0.112	0.112	0.113	0.113	0.114	0.114	0.115	0.115	0.116	0.116	0.117	0.118	0.118	0.12	0.12	0.121
	E8	0.111	0.11	0.11	0.11	0.11	0.11	0.11	0.11	0.109	0.109	0.109	0.109	0.109	0.109	0.109	0.109	0.11	0.11	0.11	0.11	0.11	0.11	0.111	0.111	0.111	0.111	0.112	0.112	0.112	0.112	0.113	0.113	0.114	0.114	0.115	0.115	0.115	0.116	0.117	0.117	0.118	0.119	0.12	0.12	0.121	0.122	0.123	0.124
	E9	0.108	0.108	0.108	0.108	0.108	0.108	0.108	0.108	0.107	0.107	0.107	0.107	0.107	0.107	0.107	0.107	0.107	0.107	0.107	0.107	0.107	0.107	0.107	0.107	0.107	0.107	0.107	0.107	0.108	0.108	0.108	0.108	0.108	0.108	0.109	0.109	0.109	0.11	0.11	0.11	0.111	0.111	0.112	0.112	0.112	0.114	0.116	0.115
	E10	0.108	0.108	0.108	0.108	0.109	0.108	0.108	0.108	0.107	0.107	0.107	0.107	0.107	0.107	0.107	0.108	0.107	0.107	0.107	0.108	0.107	0.108	0.107	0.108	0.11	0.108	0.108	0.108	0.109	0.109	0.109	0.109	0.11	0.11	0.111	0.111	0.111	0.112	0.113	0.113	0.113	0.114	0.115	0.116	0.116	0.117	0.121	0.119
	E11	0.116	0.111	0.111	0.111	0.111	0.111	0.11	0.11	0.11	0.11	0.11	0.11	0.11	0.11	0.11	0.11	0.11	0.11	0.11	0.111	0.11	0.11	0.111	0.112	0.112	0.111	0.111	0.112	0.113	0.112	0.112	0.113	0.114	0.113	0.115	0.114	0.115	0.115	0.117	0.116	0.117	0.117	0.119	0.119	0.119	0.121	0.124	0.123
	E12	0.111	0.111	0.111	0.111	0.111	0.11	0.11	0.11	0.11	0.11	0.11	0.11	0.11	0.111	0.11	0.111	0.111	0.111	0.111	0.111	0.111	0.112	0.111	0.112	0.112	0.112	0.113	0.113	0.114	0.113	0.114	0.114	0.115	0.115	0.115	0.116	0.116	0.117	0.117	0.118	0.118	0.119	0.12	0.121	0.121	0.122	0.123	0.124
	F1	0.11	0.11	0.11	0.11	0.111	0.11	0.11	0.11	0.11	0.11	0.11	0.11	0.11	0.11	0.11	0.11	0.11	0.11	0.11	0.111	0.111	0.111	0.111	0.111	0.112	0.112	0.112	0.112	0.112	0.113	0.113	0.113	0.114	0.114	0.115	0.115	0.115	0.116	0.116	0.117	0.118	0.118	0.119	0.12	0.12	0.121	0.122	0.126
	F2	0.111	0.109	0.11	0.11	0.11	0.109	0.109	0.109	0.109	0.109	0.109	0.109	0.109	0.109	0.109	0.109	0.109	0.109	0.109	0.11	0.11	0.11	0.11	0.11	0.11	0.111	0.111	0.111	0.111	0.112	0.112	0.112	0.113	0.113	0.114	0.114	0.114	0.115	0.115	0.116	0.116	0.117	0.118	0.118	0.119	0.12	0.12	0.121
	F3	0.111	0.11	0.11	0.11	0.111	0.11	0.11	0.11	0.109	0.109	0.109	0.109	0.109	0.109	0.109	0.109	0.109	0.11	0.11	0.11	0.11	0.11	0.11	0.11	0.11	0.111	0.111	0.111	0.112	0.112	0.112	0.113	0.113	0.114	0.114	0.114	0.115	0.115	0.116	0.116	0.117	0.117	0.118	0.119	0.119	0.12	0.121	0.122
	F4	0.11	0.11	0.11	0.11	0.11	0.11	0.11	0.11	0.11	0.109	0.11	0.11	0.11	0.109	0.109	0.11	0.11	0.11	0.11	0.11	0.11	0.11	0.111	0.111	0.111	0.111	0.111	0.112	0.112	0.112	0.113	0.113	0.113	0.114	0.114	0.115	0.115	0.116	0.116	0.117	0.117	0.118	0.119	0.119	0.12	0.121	0.121	0.122
	F5	0.11	0.109	0.109	0.109	0.109	0.109	0.109	0.109	0.109	0.108	0.108	0.108	0.108	0.108	0.108	0.108	0.108	0.109	0.108	0.109	0.109	0.109	0.109	0.109	0.109	0.11	0.11	0.11	0.11	0.111	0.111	0.111	0.112	0.112	0.112	0.113	0.113	0.114	0.114	0.114	0.115	0.116	0.116	0.117	0.117	0.118	0.119	0.12
	F6	0.11	0.109	0.109	0.109	0.109	0.109	0.108	0.108	0.108	0.108	0.108	0.108	0.108	0.108	0.108	0.108	0.108	0.109	0.109	0.109	0.109	0.109	0.109	0.109	0.11	0.11	0.11	0.11	0.111	0.111	0.111	0.111	0.112	0.112	0.113	0.113	0.113	0.114	0.114	0.115	0.115	0.116	0.117	0.117	0.117	0.118	0.119	0.12
	F7	0.11	0.11	0.11	0.11	0.11	0.11	0.11	0.11	0.11	0.11	0.11	0.11	0.11	0.11	0.11	0.11	0.11	0.111	0.111	0.111	0.111	0.111	0.111	0.112	0.112	0.112	0.112	0.113	0.113	0.113	0.114	0.114	0.115	0.115	0.115	0.116	0.116	0.117	0.117	0.118	0.118	0.119	0.12	0.121	0.121	0.122	0.123	0.124
	F8	0.111	0.111	0.111	0.111	0.111	0.111	0.111	0.111	0.111	0.111	0.111	0.111	0.111	0.111	0.111	0.111	0.111	0.112	0.112	0.112	0.112	0.112	0.112	0.113	0.113	0.113	0.113	0.114	0.114	0.114	0.115	0.115	0.115	0.116	0.117	0.117	0.117	0.117	0.118	0.119	0.119	0.12	0.121	0.121	0.122	0.123	0.124	0.125
	F9	0.12	0.114	0.11	0.116	0.111	0.112	0.111	0.111	0.111	0.111	0.111	0.111	0.111	0.111	0.111	0.112	0.112	0.112	0.112	0.112	0.113	0.113	0.113	0.114	0.114	0.114	0.114	0.114	0.115	0.115	0.116	0.116	0.117	0.117	0.118	0.118	0.119	0.119	0.12	0.12	0.121	0.122	0.123	0.123	0.124	0.126	0.126	0.127
	F10	0.111	0.111	0.111	0.111	0.112	0.111	0.111	0.111	0.111	0.11	0.11	0.11	0.11	0.111	0.111	0.111	0.111	0.111	0.111	0.112	0.112	0.112	0.112	0.113	0.112	0.112	0.113	0.113	0.114	0.114	0.114	0.114	0.115	0.115	0.116	0.116	0.117	0.117	0.118	0.118	0.119	0.119	0.121	0.121	0.122	0.123	0.123	0.125
	F11	0.113	0.113	0.113	0.113	0.113	0.113	0.113	0.113	0.112	0.112	0.112	0.112	0.112	0.112	0.112	0.113	0.112	0.113	0.113	0.113	0.113	0.113	0.113	0.114	0.114	0.114	0.114	0.114	0.115	0.115	0.115	0.116	0.116	0.116	0.117	0.117	0.117	0.118	0.119	0.119	0.119	0.12	0.121	0.121	0.121	0.123	0.123	0.124
	F12	0.111	0.111	0.111	0.111	0.112	0.112	0.111	0.111	0.111	0.111	0.111	0.111	0.111	0.111	0.111	0.111	0.111	0.112	0.112	0.112	0.112	0.112	0.112	0.112	0.113	0.113	0.113	0.114	0.114	0.114	0.114	0.115	0.115	0.116	0.116	0.117	0.117	0.117	0.118	0.118	0.119	0.12	0.12	0.121	0.122	0.122	0.123	0.124
	G1	0.107	0.111	0.107	0.107	0.107	0.107	0.107	0.107	0.107	0.107	0.107	0.107	0.107	0.107	0.107	0.107	0.107	0.108	0.108	0.108	0.108	0.108	0.108	0.108	0.108	0.108	0.109	0.109	0.109	0.109	0.11	0.11	0.11	0.111	0.111	0.111	0.112	0.112	0.112	0.113	0.113	0.114	0.114	0.115	0.115	0.116	0.116	0.117
	G2	0.107	0.107	0.107	0.107	0.107	0.107	0.107	0.107	0.107	0.107	0.107	0.107	0.107	0.107	0.107	0.107	0.107	0.107	0.107	0.107	0.107	0.108	0.108	0.108	0.108	0.108	0.108	0.108	0.109	0.109	0.109	0.109	0.11	0.11	0.11	0.111	0.111	0.111	0.112	0.112	0.112	0.113	0.113	0.114	0.114	0.115	0.115	0.116
	G3	0.109	0.109	0.109	0.109	0.109	0.109	0.109	0.109	0.109	0.108	0.108	0.108	0.109	0.108	0.108	0.109	0.109	0.109	0.109	0.109	0.109	0.109	0.109	0.109	0.11	0.11	0.11	0.11	0.11	0.11	0.11	0.111	0.111	0.111	0.111	0.112	0.112	0.112	0.113	0.113	0.113	0.114	0.114	0.115	0.115	0.115	0.116	0.117
	G4	0.111	0.11	0.111	0.111	0.111	0.11	0.111	0.11	0.111	0.11	0.11	0.11	0.111	0.111	0.11	0.111	0.111	0.111	0.111	0.111	0.111	0.111	0.112	0.112	0.112	0.112	0.113	0.113	0.113	0.113	0.113	0.114	0.114	0.114	0.115	0.115	0.115	0.116	0.116	0.116	0.117	0.117	0.118	0.118	0.119	0.119	0.12	0.12
	G5	0.108	0.108	0.108	0.108	0.108	0.108	0.108	0.108	0.108	0.108	0.108	0.108	0.108	0.108	0.108	0.108	0.108	0.109	0.108	0.109	0.109	0.109	0.109	0.109	0.11	0.11	0.11	0.11	0.11	0.111	0.111	0.111	0.112	0.112	0.112	0.112	0.113	0.113	0.114	0.114	0.114	0.115	0.115	0.116	0.116	0.117	0.117	0.118
	G6	0.109	0.108	0.109	0.109	0.109	0.109	0.108	0.109	0.109	0.109	0.109	0.109	0.109	0.109	0.109	0.109	0.109	0.11	0.11	0.11	0.11	0.11	0.11	0.111	0.111	0.111	0.111	0.111	0.112	0.112	0.112	0.113	0.113	0.113	0.114	0.114	0.114	0.115	0.115	0.116	0.116	0.117	0.117	0.118	0.118	0.119	0.119	0.12
	G7	0.109	0.109	0.108	0.108	0.108	0.108	0.108	0.108	0.107	0.107	0.107	0.107	0.107	0.107	0.107	0.107	0.107	0.107	0.107	0.107	0.107	0.107	0.107	0.108	0.108	0.108	0.108	0.108	0.108	0.109	0.109	0.109	0.109	0.11	0.11	0.11	0.11	0.11	0.111	0.111	0.111	0.112	0.112	0.112	0.113	0.113	0.113	0.114
	G8	0.108	0.108	0.108	0.108	0.108	0.107	0.107	0.107	0.107	0.107	0.107	0.107	0.107	0.107	0.107	0.107	0.106	0.107	0.107	0.107	0.107	0.107	0.107	0.107	0.107	0.107	0.107	0.107	0.108	0.108	0.108	0.108	0.108	0.108	0.109	0.109	0.109	0.109	0.11	0.11	0.11	0.11	0.111	0.111	0.111	0.112	0.112	0.112
	G9	0.11	0.11	0.11	0.109	0.11	0.11	0.109	0.109	0.109	0.109	0.109	0.109	0.109	0.109	0.109	0.109	0.109	0.109	0.109	0.11	0.11	0.109	0.11	0.11	0.11	0.11	0.11	0.11	0.111	0.111	0.111	0.111	0.112	0.112	0.113	0.113	0.113	0.113	0.114	0.114	0.114	0.115	0.116	0.116	0.116	0.117	0.117	0.118
	G10	0.11	0.11	0.11	0.11	0.11	0.11	0.109	0.109	0.109	0.109	0.109	0.109	0.109	0.109	0.109	0.109	0.108	0.109	0.109	0.109	0.108	0.109	0.109	0.109	0.109	0.109	0.109	0.109	0.11	0.109	0.11	0.11	0.11	0.11	0.111	0.111	0.111	0.111	0.112	0.111	0.112	0.112	0.113	0.113	0.113	0.114	0.114	0.115
	G11	0.107	0.107	0.107	0.107	0.107	0.107	0.107	0.106	0.106	0.106	0.106	0.106	0.106	0.106	0.106	0.106	0.105	0.106	0.106	0.106	0.106	0.106	0.106	0.106	0.106	0.106	0.106	0.106	0.107	0.106	0.106	0.107	0.107	0.107	0.108	0.107	0.108	0.108	0.109	0.108	0.108	0.109	0.11	0.11	0.11	0.111	0.11	0.112
	G12	0.109	0.109	0.109	0.109	0.11	0.109	0.109	0.109	0.109	0.109	0.109	0.109	0.109	0.109	0.109	0.109	0.109	0.109	0.109	0.109	0.109	0.109	0.109	0.109	0.109	0.109	0.109	0.109	0.11	0.11	0.11	0.11	0.11	0.11	0.111	0.111	0.111	0.111	0.111	0.112	0.112	0.112	0.113	0.113	0.113	0.114	0.114	0.115
	H1	0.09	0.09	0.09	0.09	0.09	0.09	0.09	0.09	0.09	0.09	0.09	0.09	0.09	0.09	0.09	0.09	0.09	0.09	0.09	0.09	0.09	0.09	0.09	0.09	0.09	0.09	0.09	0.09	0.09	0.09	0.09	0.09	0.09	0.09	0.09	0.09	0.09	0.09	0.09	0.09	0.09	0.09	0.09	0.09	0.09	0.09	0.09	0.09
	H2	0.092	0.092	0.092	0.092	0.092	0.092	0.092	0.092	0.092	0.092	0.092	0.092	0.092	0.092	0.092	0.092	0.092	0.092	0.092	0.092	0.092	0.092	0.092	0.092	0.092	0.092	0.092	0.092	0.092	0.092	0.092	0.092	0.092	0.092	0.092	0.092	0.092	0.092	0.092	0.092	0.092	0.092	0.092	0.092	0.092	0.092	0.092	0.092
	H3	0.091	0.091	0.091	0.091	0.09	0.09	0.09	0.091	0.09	0.09	0.091	0.09	0.09	0.091	0.09	0.09	0.09	0.09	0.09	0.091	0.09	0.09	0.09	0.091	0.09	0.09	0.09	0.09	0.091	0.09	0.09	0.09	0.091	0.091	0.09	0.09	0.09	0.09	0.09	0.09	0.09	0.09	0.091	0.09	0.09	0.09	0.09	0.09
	H4	0.09	0.09	0.09	0.09	0.09	0.09	0.09	0.09	0.09	0.09	0.09	0.09	0.09	0.09	0.09	0.09	0.09	0.09	0.09	0.09	0.09	0.09	0.09	0.09	0.09	0.09	0.09	0.09	0.09	0.09	0.09	0.09	0.09	0.09	0.09	0.09	0.09	0.09	0.09	0.09	0.09	0.09	0.09	0.09	0.09	0.09	0.09	0.09
	H5	0.09	0.09	0.09	0.09	0.09	0.09	0.09	0.09	0.09	0.09	0.09	0.09	0.09	0.09	0.09	0.09	0.09	0.09	0.09	0.09	0.09	0.09	0.09	0.09	0.09	0.09	0.09	0.09	0.09	0.09	0.09	0.09	0.09	0.09	0.09	0.09	0.09	0.09	0.09	0.09	0.09	0.09	0.09	0.09	0.09	0.09	0.09	0.09
	H6	0.089	0.089	0.089	0.089	0.089	0.089	0.089	0.089	0.089	0.089	0.089	0.089	0.089	0.089	0.089	0.089	0.089	0.089	0.089	0.089	0.089	0.089	0.089	0.089	0.089	0.089	0.089	0.089	0.089	0.089	0.089	0.089	0.089	0.089	0.089	0.089	0.089	0.089	0.089	0.089	0.089	0.089	0.089	0.089	0.089	0.089	0.089	0.089
	H7	0.089	0.089	0.089	0.089	0.089	0.089	0.089	0.089	0.089	0.089	0.089	0.089	0.089	0.089	0.089	0.089	0.089	0.089	0.089	0.089	0.089	0.089	0.089	0.089	0.089	0.089	0.089	0.089	0.089	0.089	0.089	0.089	0.089	0.089	0.089	0.089	0.089	0.089	0.089	0.089	0.089	0.089	0.089	0.089	0.089	0.089	0.089	0.089
	H8	0.089	0.089	0.089	0.089	0.089	0.089	0.089	0.089	0.089	0.089	0.089	0.089	0.089	0.089	0.089	0.089	0.089	0.089	0.089	0.089	0.089	0.089	0.089	0.089	0.089	0.089	0.089	0.089	0.089	0.089	0.089	0.089	0.089	0.089	0.089	0.089	0.089	0.089	0.089	0.089	0.089	0.089	0.089	0.089	0.089	0.089	0.089	0.089
	H9	0.09	0.089	0.089	0.089	0.089	0.089	0.089	0.089	0.089	0.089	0.089	0.089	0.089	0.089	0.089	0.089	0.089	0.09	0.089	0.089	0.089	0.089	0.089	0.089	0.089	0.089	0.089	0.089	0.089	0.09	0.089	0.089	0.089	0.089	0.089	0.089	0.09	0.089	0.089	0.089	0.089	0.089	0.09	0.089	0.089	0.089	0.089	0.089
	H10	0.089	0.089	0.089	0.089	0.089	0.089	0.089	0.089	0.089	0.089	0.089	0.089	0.089	0.089	0.089	0.089	0.089	0.089	0.089	0.089	0.089	0.089	0.089	0.089	0.089	0.089	0.089	0.089	0.089	0.089	0.089	0.089	0.089	0.089	0.089	0.089	0.089	0.089	0.089	0.089	0.089	0.089	0.089	0.089	0.089	0.089	0.089	0.089
	H11	0.088	0.088	0.088	0.088	0.088	0.088	0.088	0.088	0.088	0.088	0.088	0.088	0.088	0.088	0.088	0.088	0.088	0.088	0.088	0.088	0.088	0.088	0.088	0.088	0.088	0.088	0.088	0.088	0.088	0.088	0.088	0.088	0.088	0.089	0.088	0.088	0.088	0.088	0.088	0.088	0.088	0.088	0.088	0.089	0.088	0.088	0.088	0.088
	H12	0.089	0.089	0.089	0.089	0.089	0.089	0.089	0.089	0.089	0.089	0.089	0.089	0.089	0.089	0.089	0.089	0.089	0.089	0.089	0.089	0.089	0.089	0.089	0.089	0.089	0.089	0.089	0.089	0.089	0.089	0.089	0.089	0.089	0.089	0.089	0.089	0.089	0.089	0.089	0.089	0.089	0.089	0.089	0.089	0.089	0.089	0.089	0.089
Results
		1	2	3	4	5	6	7	8	9	10	11	12
	A	-0.04	-0.04	-0.06	0.06	0.04	-0.04	0.08	-0.04	-0.04	-0.04	0.06	-0.04	Max V [Read 2:600]
		1	1	1	1	1	1	1	1	1	1	1	1	R-Squared [Read 2:600]
		00:51:46	19:21:46	13:26:46	19:16:46	05:31:46	13:26:46	12:31:46	16:01:46	03:56:46	18:36:46	14:56:46	15:16:46	t at Max V [Read 2:600]
		00:46:46	19:21:46	13:24:16	19:20:56	05:34:16	13:24:16	12:29:16	16:46:46	03:54:16	18:36:46	14:57:36	15:14:16	Lagtime [Read 2:600]
	B	3.94	3.96	4.04	3.86	3.86	4.16	4.34	4.86	4.84	5.66	5.8	6.2	Max V [Read 2:600]
		1	1	1	1	1	1	1	1	1	1	1	1	R-Squared [Read 2:600]
		10:51:46	10:16:46	10:46:46	11:21:46	10:01:46	11:31:46	11:31:46	11:46:46	11:31:46	10:46:46	10:46:46	11:46:46	t at Max V [Read 2:600]
		07:29:46	07:39:14	07:49:01	07:42:52	07:38:06	08:03:53	08:09:10	08:53:02	08:39:07	08:56:12	09:01:16	10:02:47	Lagtime [Read 2:600]
	C	3.76	3.88	3.96	4.3	4.26	4.28	4.74	4.58	4.72	4.46	5.18	4.56	Max V [Read 2:600]
		1	1	1	1	1	1	1	1	1	1	1	1	R-Squared [Read 2:600]
		10:21:46	11:01:46	11:36:46	11:46:46	10:46:46	10:46:46	11:31:46	11:31:46	10:46:46	10:36:46	10:46:46	13:06:46	t at Max V [Read 2:600]
		07:26:22	07:34:55	08:04:22	08:14:36	08:02:01	07:51:59	08:55:13	08:58:24	08:46:46	08:32:53	08:43:57	09:30:48	Lagtime [Read 2:600]
	D	3.7	3.82	3.84	4.32	4.14	4.86	4.8	4.78	4.72	4.82	4.92	6.72	Max V [Read 2:600]
		1	1	1	1	1	1	1	1	1	1	1	1	R-Squared [Read 2:600]
		11:41:46	11:16:46	11:46:46	11:31:46	11:31:46	11:31:46	11:31:46	11:31:46	10:46:46	10:46:46	11:46:46	02:16:46	t at Max V [Read 2:600]
		07:54:47	08:24:16	08:26:19	08:31:32	08:39:36	09:05:07	09:03:26	08:58:09	08:39:41	08:38:08	09:06:07	02:16:57	Lagtime [Read 2:600]
	E	3.7	3.98	3.74	4.16	4.02	4.38	4.52	4.42	4.56	4.3	4.84	3.98	Max V [Read 2:600]
		1	1	1	1	1	1	1	1	1	1	1	1	R-Squared [Read 2:600]
		11:01:46	10:51:46	10:01:46	11:16:46	10:56:46	11:31:46	10:46:46	10:46:46	10:46:46	11:31:46	10:46:46	10:21:46	t at Max V [Read 2:600]
		07:50:26	07:40:21	07:37:53	08:00:21	07:59:41	08:32:18	08:15:37	08:04:23	08:53:23	08:32:41	08:32:08	07:48:16	Lagtime [Read 2:600]
	F	3.74	3.56	3.64	3.8	3.96	4.16	4.1	4.48	4.24	4.4	4.6	3.86	Max V [Read 2:600]
		1	1	1	1	1	1	1	1	1	1	1	1	R-Squared [Read 2:600]
		11:26:46	10:46:46	11:41:46	11:31:46	11:21:46	11:31:46	11:31:46	11:31:46	10:56:46	11:31:46	11:31:46	09:56:46	t at Max V [Read 2:600]
		08:01:18	07:58:19	08:03:56	08:11:25	08:22:41	08:35:43	08:13:50	08:31:07	08:07:00	08:28:02	08:46:29	07:57:26	Lagtime [Read 2:600]
	G	3.72	3.9	3.68	3.72	3.68	3.68	3.72	3.74	3.88	3.82	3.82	3.82	Max V [Read 2:600]
		1	1	1	1	1	1	1	1	1	1	1	1	R-Squared [Read 2:600]
		12:16:46	13:11:46	12:56:46	12:26:46	12:06:46	12:26:46	13:26:46	12:36:46	11:26:46	13:41:46	14:01:46	12:56:46	t at Max V [Read 2:600]
		08:59:58	09:33:04	09:29:24	09:05:08	08:55:55	08:49:26	09:50:14	10:02:12	09:11:40	10:15:38	10:32:07	10:00:52	Lagtime [Read 2:600]
	H	0.04	0.04	-0.04	-0.06	0.06	-0.04	0.04	-0.04	-0.06	-0.04	0.06	-0.04	Max V [Read 2:600]
		1	1	1	1	1	1	1	1	1	1	1	1	R-Squared [Read 2:600]
		01:46:46	05:31:46	00:56:46	19:01:46	19:06:46	03:41:46	14:11:46	14:06:46	13:26:46	00:26:46	19:16:46	16:41:46	t at Max V [Read 2:600]
		01:49:16	05:34:16	00:54:16	18:59:16	19:09:16	03:39:16	14:11:46	14:06:46	13:22:36	00:26:46	19:15:56	16:39:16	Lagtime [Read 2:600]
[truncated: 385 more columns]

## Sheet: Rep 1 Doubling times
Inf	Inf	Inf	Inf	210605	Inf	61640.7	70505.9	1.97161e+06	91735.9	Inf	Inf
137.739	139.884	139.205	139.248	139.33	139.357	139.384	144.08	141.318	144.261	143.759	151.071	WT	139.127	143.979
138.2	139.345	142.153	141.261	139.993	138.866	143.743	146.993	145.001	143.809	143.16	146.161	V410I	139.97	144.811
142.698	147.317	146.038	145.446	145.665	145.337	145.062	143.615	143.219	142.633	145.555	151.703	V410A	145.417	145.298
141.617	139.303	140.822	139.664	140.906	143.915	140.468	140.027	144.896	145.594	144.011	141.656	R403H	141.038	142.775
145.909	147.54	146.317	147.373	146.162	147.029	144	144.375	143.77	144.418	145.908	144.527	R403C	146.722	144.5
153.51	155.994	159.616	157.188	153.743	153.598	160.363	159.805	155.861	163.798	163.246	161.178	V410D	155.608	160.708
Inf	Inf	1.96133e+06	-2.12084e+06	Inf	Inf	Inf	Inf	1.01422e+06	Inf	272901	Inf
Normalized to WT for that set
0.990023	1.00544	1.00056	1.00087	1.00146	1.00165	0.968085	1.0007	0.981523	1.00196	0.998474	1.04926	WT	1	1
0.993335	1.00156	1.02175	1.01534	1.00622	0.998121	0.998363	1.02093	1.0071	0.998822	0.994313	1.01516	V410I	1.00605	1.00578
1.02567	1.05886	1.04967	1.04542	1.04699	1.04464	1.00752	0.997474	0.994725	0.99065	1.01095	1.05365	V410A	1.04521	1.00916
												R403H	1.01373	0.991641
												R403C	1.05459	1.00362
1.10338	1.12123	1.14726	1.12981	1.10505	1.10401	1.11379	1.10992	1.08252	1.13765	1.13382	1.11946	V410D	1.11846	1.11619

## Sheet: Rep 2 Plate 1 - Sheet1
Software Version	3.10.06
Experiment File Path:	C:\Users\Moore Lab Plate Read\Desktop\KJH\082521_LGA\082521.xpt
Protocol File Path:	C:\Users\Moore Lab Plate Read\Desktop\Protocols\Liquid Growth Assay Modified CF.prt
Plate Number	Plate 1
Date	2021-08-25
Time	17:24:27
Reader Type:	Epoch 2
Reader Serial Number:	200916F
Reading Type	Reader
Procedure Details
Plate Type	96 WELL PLATE (Use plate lid)
Well Selection	Runtime
Eject plate on completion
Set Temperature	Setpoint 30°C, Gradient 0 °C
	Preheat before moving to next step
Read	Absorbance Endpoint
	Full Plate
	Wavelengths: 600
	Read Speed: Normal, Delay: 100 msec, Measurements/Data Point: 8
Start Kinetic	Runtime 36:00:00 (HH:MM:SS), Interval 0:05:00, 433 Reads
Shake	Orbital: Continuous
	Frequency: 559 cpm (1 mm)
Read	Absorbance Endpoint
	Full Plate
	Wavelengths: 600
	Read Speed: Normal, Delay: 100 msec, Measurements/Data Point: 8
End Kinetic
Plate In
Layout
		1	2	3	4	5	6	7	8	9	10	11	12
	A	SPL1	SPL9	SPL17	SPL25	SPL33	SPL41	SPL49	SPL57	SPL65	SPL73	SPL81	SPL89	Well ID
	B	SPL2	SPL10	SPL18	SPL26	SPL34	SPL42	SPL50	SPL58	SPL66	SPL74	SPL82	SPL90	Well ID
	C	SPL3	SPL11	SPL19	SPL27	SPL35	SPL43	SPL51	SPL59	SPL67	SPL75	SPL83	SPL91	Well ID
	D	SPL4	SPL12	SPL20	SPL28	SPL36	SPL44	SPL52	SPL60	SPL68	SPL76	SPL84	SPL92	Well ID
	E	SPL5	SPL13	SPL21	SPL29	SPL37	SPL45	SPL53	SPL61	SPL69	SPL77	SPL85	SPL93	Well ID
	F	SPL6	SPL14	SPL22	SPL30	SPL38	SPL46	SPL54	SPL62	SPL70	SPL78	SPL86	SPL94	Well ID
	G	SPL7	SPL15	SPL23	SPL31	SPL39	SPL47	SPL55	SPL63	SPL71	SPL79	SPL87	SPL95	Well ID
	H	SPL8	SPL16	SPL24	SPL32	SPL40	SPL48	SPL56	SPL64	SPL72	SPL80	SPL88	SPL96	Well ID
Results
Actual Temperature:	29.9
		1	2	3	4	5	6	7	8	9	10	11	12
	A	0.091	0.092	0.092	0.09	0.092	0.09	0.09	0.089	0.091	0.089	0.092	0.089	Read 1:600
	B	0.112	0.113	0.11	0.112	0.111	0.109	0.11	0.11	0.109	0.112	0.112	0.111	Read 1:600
	C	0.108	0.11	0.109	0.107	0.108	0.106	0.109	0.112	0.108	0.108	0.107	0.108	Read 1:600
	D	0.107	0.11	0.111	0.108	0.109	0.107	0.11	0.11	0.109	0.108	0.108	0.111	Read 1:600
	E	0.111	0.111	0.11	0.11	0.111	0.111	0.11	0.111	0.11	0.11	0.11	0.109	Read 1:600
	F	0.112	0.111	0.112	0.111	0.112	0.113	0.111	0.11	0.11	0.112	0.112	0.111	Read 1:600
	G	0.11	0.109	0.109	0.108	0.108	0.11	0.108	0.107	0.112	0.11	0.108	0.108	Read 1:600
	H	0.089	0.09	0.092	0.09	0.09	0.09	0.09	0.089	0.09	0.089	0.089	0.089	Read 1:600
Read 2:600
	Time	00:04:16	00:09:16	00:14:16	00:19:16	00:24:16	00:29:16	00:34:16	00:39:16	00:44:16	00:49:16	00:54:16	00:59:16	01:04:16	01:09:16	01:14:16	01:19:16	01:24:16	01:29:16	01:34:16	01:39:16	01:44:16	01:49:16	01:54:16	01:59:16	02:04:16	02:09:16	02:14:16	02:19:16	02:24:16	02:29:16	02:34:16	02:39:16	02:44:16	02:49:16	02:54:16	02:59:16	03:04:16	03:09:16	03:14:16	03:19:16	03:24:16	03:29:16	03:34:16	03:39:16	03:44:16	03:49:16	03:54:16	03:59:16
	T° Read 2:600	30	30	30	30	30	30	30	29.9	30	30	30	30	30	30	30	30	30	30	30	30	30	30	30	30	30	30	30	30	30	30	30	30	30	30	30	30	30	30.1	30.1	30.1	30.1	30.1	30.1	30.1	30.1	30	30.1	30
	A1	0.091	0.091	0.091	0.091	0.091	0.091	0.091	0.091	0.091	0.091	0.091	0.091	0.091	0.091	0.091	0.091	0.091	0.091	0.091	0.091	0.091	0.091	0.091	0.091	0.091	0.091	0.091	0.091	0.091	0.091	0.091	0.091	0.091	0.091	0.091	0.091	0.091	0.091	0.091	0.091	0.091	0.091	0.091	0.091	0.091	0.091	0.091	0.091
	A2	0.092	0.092	0.092	0.092	0.092	0.092	0.092	0.092	0.092	0.092	0.092	0.092	0.092	0.092	0.092	0.092	0.092	0.092	0.092	0.092	0.092	0.092	0.092	0.092	0.092	0.092	0.092	0.092	0.092	0.092	0.092	0.092	0.092	0.092	0.092	0.092	0.092	0.092	0.092	0.092	0.092	0.092	0.092	0.092	0.092	0.092	0.092	0.092
	A3	0.092	0.091	0.091	0.091	0.091	0.091	0.091	0.091	0.091	0.091	0.091	0.091	0.091	0.091	0.091	0.091	0.091	0.091	0.091	0.091	0.091	0.091	0.091	0.091	0.091	0.091	0.091	0.091	0.091	0.091	0.091	0.091	0.091	0.091	0.091	0.091	0.091	0.091	0.091	0.091	0.091	0.091	0.091	0.091	0.091	0.091	0.091	0.091
	A4	0.09	0.09	0.09	0.09	0.09	0.09	0.09	0.09	0.09	0.09	0.09	0.09	0.09	0.09	0.09	0.09	0.09	0.09	0.09	0.09	0.09	0.09	0.09	0.09	0.09	0.09	0.09	0.09	0.09	0.09	0.09	0.09	0.09	0.09	0.09	0.09	0.09	0.09	0.09	0.09	0.09	0.09	0.09	0.09	0.09	0.09	0.09	0.09
	A5	0.092	0.092	0.091	0.092	0.092	0.091	0.091	0.091	0.091	0.091	0.091	0.091	0.091	0.091	0.091	0.091	0.091	0.091	0.091	0.091	0.091	0.091	0.091	0.091	0.091	0.091	0.091	0.091	0.091	0.091	0.091	0.091	0.091	0.091	0.091	0.091	0.091	0.091	0.091	0.091	0.091	0.091	0.091	0.091	0.091	0.091	0.091	0.091
	A6	0.09	0.09	0.089	0.09	0.089	0.089	0.089	0.089	0.089	0.089	0.089	0.089	0.089	0.089	0.09	0.089	0.089	0.089	0.089	0.089	0.089	0.089	0.089	0.089	0.089	0.089	0.089	0.089	0.089	0.089	0.089	0.089	0.089	0.089	0.089	0.089	0.089	0.089	0.089	0.089	0.089	0.089	0.089	0.089	0.089	0.089	0.089	0.089
	A7	0.09	0.09	0.09	0.09	0.09	0.09	0.09	0.09	0.09	0.09	0.09	0.09	0.09	0.09	0.09	0.09	0.09	0.09	0.09	0.09	0.09	0.09	0.09	0.09	0.09	0.09	0.09	0.09	0.09	0.09	0.09	0.09	0.09	0.09	0.09	0.09	0.09	0.09	0.09	0.09	0.09	0.09	0.09	0.09	0.09	0.09	0.09	0.09
	A8	0.089	0.089	0.089	0.089	0.089	0.089	0.089	0.089	0.089	0.089	0.089	0.089	0.089	0.089	0.089	0.089	0.089	0.089	0.089	0.089	0.089	0.089	0.089	0.089	0.089	0.089	0.089	0.089	0.089	0.089	0.089	0.089	0.089	0.089	0.089	0.089	0.089	0.089	0.089	0.089	0.089	0.089	0.089	0.089	0.089	0.089	0.089	0.089
	A9	0.091	0.091	0.091	0.091	0.091	0.091	0.091	0.091	0.091	0.091	0.091	0.091	0.091	0.091	0.091	0.091	0.091	0.091	0.091	0.091	0.091	0.091	0.091	0.091	0.091	0.091	0.091	0.091	0.091	0.091	0.091	0.091	0.091	0.091	0.091	0.091	0.091	0.091	0.091	0.091	0.091	0.091	0.091	0.091	0.091	0.091	0.091	0.091
	A10	0.089	0.088	0.088	0.088	0.088	0.088	0.088	0.088	0.088	0.088	0.088	0.088	0.088	0.088	0.088	0.088	0.088	0.088	0.089	0.088	0.088	0.088	0.088	0.088	0.088	0.088	0.088	0.088	0.088	0.088	0.088	0.088	0.088	0.088	0.088	0.088	0.088	0.088	0.088	0.088	0.088	0.088	0.088	0.088	0.088	0.088	0.088	0.088
	A11	0.091	0.091	0.091	0.091	0.091	0.091	0.091	0.091	0.091	0.091	0.091	0.091	0.091	0.091	0.091	0.091	0.091	0.091	0.091	0.091	0.091	0.091	0.091	0.091	0.091	0.091	0.091	0.091	0.091	0.091	0.091	0.091	0.091	0.091	0.091	0.091	0.091	0.091	0.091	0.091	0.091	0.091	0.091	0.091	0.091	0.091	0.091	0.091
	A12	0.089	0.089	0.089	0.089	0.089	0.088	0.089	0.088	0.088	0.088	0.088	0.088	0.088	0.089	0.088	0.088	0.088	0.088	0.089	0.088	0.089	0.088	0.088	0.088	0.088	0.088	0.088	0.088	0.088	0.088	0.088	0.088	0.088	0.088	0.088	0.088	0.088	0.088	0.088	0.088	0.088	0.088	0.089	0.088	0.088	0.088	0.088	0.088
	B1	0.111	0.111	0.111	0.11	0.111	0.11	0.111	0.111	0.111	0.111	0.111	0.112	0.112	0.112	0.113	0.113	0.114	0.114	0.115	0.115	0.115	0.116	0.116	0.117	0.117	0.118	0.118	0.119	0.12	0.12	0.121	0.121	0.122	0.123	0.124	0.125	0.126	0.127	0.128	0.129	0.131	0.132	0.133	0.135	0.136	0.138	0.139	0.141
	B2	0.111	0.111	0.11	0.111	0.111	0.111	0.112	0.112	0.112	0.112	0.112	0.112	0.113	0.113	0.113	0.114	0.114	0.115	0.115	0.116	0.116	0.117	0.117	0.118	0.118	0.119	0.119	0.12	0.121	0.122	0.122	0.123	0.124	0.125	0.126	0.127	0.128	0.129	0.13	0.131	0.133	0.134	0.136	0.137	0.139	0.141	0.142	0.144
	B3	0.111	0.11	0.111	0.111	0.111	0.111	0.111	0.112	0.112	0.112	0.112	0.113	0.114	0.114	0.114	0.115	0.115	0.116	0.116	0.117	0.117	0.117	0.118	0.118	0.119	0.119	0.12	0.121	0.122	0.122	0.123	0.124	0.125	0.126	0.127	0.128	0.129	0.13	0.131	0.132	0.134	0.135	0.137	0.139	0.14	0.142	0.144	0.146
	B4	0.111	0.115	0.111	0.112	0.112	0.112	0.113	0.113	0.113	0.113	0.114	0.114	0.115	0.115	0.116	0.116	0.116	0.117	0.118	0.118	0.119	0.119	0.119	0.12	0.12	0.121	0.122	0.123	0.123	0.124	0.125	0.126	0.126	0.127	0.128	0.129	0.131	0.132	0.133	0.134	0.136	0.137	0.138	0.14	0.142	0.143	0.145	0.147
	B5	0.11	0.11	0.11	0.11	0.111	0.111	0.111	0.111	0.111	0.112	0.112	0.112	0.113	0.113	0.113	0.114	0.114	0.115	0.115	0.115	0.116	0.116	0.117	0.117	0.118	0.118	0.119	0.119	0.12	0.121	0.122	0.122	0.123	0.124	0.125	0.126	0.127	0.128	0.129	0.131	0.132	0.133	0.134	0.136	0.137	0.139	0.141	0.142
	B6	0.108	0.108	0.109	0.109	0.109	0.109	0.11	0.11	0.11	0.11	0.11	0.111	0.112	0.112	0.112	0.113	0.113	0.114	0.114	0.115	0.115	0.115	0.116	0.116	0.117	0.117	0.118	0.119	0.119	0.12	0.121	0.122	0.123	0.124	0.125	0.126	0.127	0.128	0.129	0.13	0.131	0.133	0.134	0.136	0.138	0.139	0.141	0.143
	B7	0.11	0.11	0.11	0.111	0.111	0.11	0.111	0.11	0.11	0.111	0.11	0.111	0.112	0.112	0.112	0.113	0.113	0.113	0.114	0.114	0.114	0.114	0.115	0.115	0.116	0.116	0.117	0.117	0.118	0.119	0.119	0.12	0.12	0.121	0.122	0.123	0.124	0.125	0.126	0.127	0.128	0.129	0.13	0.132	0.133	0.134	0.136	0.138
	B8	0.109	0.11	0.109	0.109	0.109	0.109	0.109	0.109	0.109	0.109	0.109	0.11	0.11	0.11	0.111	0.111	0.111	0.112	0.112	0.112	0.112	0.113	0.113	0.114	0.114	0.114	0.115	0.116	0.116	0.117	0.117	0.118	0.119	0.12	0.12	0.121	0.122	0.123	0.124	0.125	0.126	0.127	0.128	0.13	0.131	0.133	0.134	0.136
	B9	0.108	0.108	0.108	0.108	0.108	0.108	0.108	0.108	0.108	0.108	0.108	0.109	0.109	0.109	0.11	0.11	0.11	0.11	0.111	0.111	0.111	0.111	0.112	0.112	0.113	0.113	0.113	0.114	0.114	0.115	0.116	0.116	0.117	0.117	0.118	0.119	0.12	0.12	0.121	0.122	0.123	0.124	0.125	0.126	0.128	0.129	0.13	0.132
	B10	0.113	0.115	0.115	0.111	0.111	0.111	0.111	0.111	0.111	0.111	0.111	0.111	0.111	0.111	0.111	0.112	0.111	0.112	0.112	0.112	0.112	0.112	0.113	0.113	0.113	0.113	0.114	0.114	0.115	0.115	0.115	0.116	0.116	0.117	0.117	0.118	0.118	0.119	0.12	0.121	0.121	0.122	0.123	0.124	0.125	0.126	0.127	0.128
	B11	0.111	0.11	0.11	0.11	0.11	0.11	0.11	0.11	0.11	0.11	0.11	0.11	0.111	0.11	0.11	0.11	0.11	0.11	0.111	0.111	0.111	0.111	0.111	0.112	0.112	0.112	0.113	0.113	0.114	0.114	0.114	0.115	0.115	0.116	0.117	0.117	0.118	0.119	0.12	0.12	0.121	0.122	0.123	0.124	0.125	0.127	0.127	0.129
	B12	0.108	0.108	0.108	0.108	0.108	0.107	0.108	0.108	0.108	0.108	0.108	0.108	0.108	0.109	0.109	0.109	0.109	0.109	0.11	0.11	0.11	0.11	0.111	0.111	0.111	0.112	0.112	0.113	0.113	0.114	0.114	0.115	0.116	0.116	0.117	0.117	0.118	0.119	0.12	0.121	0.122	0.123	0.124	0.125	0.126	0.128	0.129	0.13
	C1	0.106	0.106	0.106	0.107	0.106	0.106	0.106	0.106	0.106	0.106	0.106	0.106	0.107	0.107	0.107	0.107	0.108	0.108	0.108	0.108	0.109	0.109	0.109	0.109	0.11	0.11	0.11	0.111	0.111	0.112	0.112	0.113	0.113	0.114	0.115	0.115	0.116	0.117	0.117	0.118	0.119	0.12	0.121	0.122	0.124	0.125	0.126	0.127
	C2	0.11	0.113	0.109	0.11	0.109	0.109	0.109	0.109	0.109	0.109	0.109	0.11	0.11	0.11	0.111	0.111	0.112	0.112	0.113	0.113	0.113	0.114	0.114	0.114	0.115	0.115	0.116	0.117	0.117	0.118	0.118	0.119	0.12	0.121	0.122	0.123	0.124	0.125	0.126	0.127	0.129	0.13	0.131	0.133	0.134	0.136	0.138	0.14
	C3	0.108	0.108	0.108	0.108	0.109	0.108	0.108	0.108	0.108	0.108	0.108	0.109	0.109	0.109	0.109	0.109	0.11	0.11	0.11	0.11	0.111	0.111	0.111	0.111	0.112	0.112	0.112	0.113	0.113	0.114	0.114	0.115	0.115	0.116	0.116	0.117	0.118	0.118	0.119	0.12	0.121	0.122	0.123	0.124	0.125	0.126	0.128	0.129
	C4	0.106	0.107	0.106	0.106	0.106	0.106	0.106	0.106	0.106	0.107	0.106	0.107	0.107	0.108	0.108	0.108	0.108	0.109	0.109	0.109	0.11	0.11	0.11	0.11	0.111	0.111	0.111	0.112	0.113	0.113	0.114	0.114	0.115	0.116	0.116	0.117	0.117	0.118	0.119	0.12	0.121	0.122	0.123	0.124	0.125	0.127	0.128	0.129
	C5	0.108	0.107	0.107	0.107	0.107	0.107	0.107	0.107	0.107	0.107	0.107	0.107	0.107	0.107	0.108	0.108	0.108	0.108	0.108	0.108	0.108	0.108	0.108	0.109	0.109	0.109	0.109	0.11	0.11	0.111	0.111	0.112	0.112	0.112	0.113	0.113	0.114	0.114	0.115	0.116	0.116	0.117	0.118	0.119	0.12	0.12	0.121	0.122
	C6	0.107	0.107	0.106	0.106	0.107	0.106	0.106	0.106	0.106	0.106	0.106	0.106	0.106	0.106	0.106	0.106	0.107	0.107	0.107	0.107	0.107	0.107	0.107	0.108	0.108	0.108	0.108	0.109	0.109	0.109	0.11	0.11	0.111	0.111	0.112	0.112	0.113	0.113	0.114	0.114	0.115	0.116	0.116	0.117	0.118	0.119	0.12	0.121
	C7	0.108	0.108	0.109	0.109	0.109	0.109	0.109	0.109	0.109	0.11	0.11	0.11	0.11	0.11	0.111	0.111	0.111	0.112	0.112	0.112	0.113	0.113	0.113	0.113	0.114	0.114	0.115	0.115	0.116	0.117	0.117	0.118	0.118	0.119	0.12	0.121	0.122	0.123	0.124	0.125	0.126	0.127	0.128	0.13	0.131	0.132	0.134	0.136
	C8	0.112	0.111	0.111	0.111	0.111	0.111	0.111	0.111	0.111	0.112	0.112	0.112	0.112	0.113	0.113	0.113	0.114	0.114	0.114	0.115	0.115	0.115	0.116	0.116	0.116	0.117	0.117	0.118	0.119	0.119	0.12	0.121	0.121	0.122	0.123	0.124	0.125	0.126	0.127	0.128	0.129	0.13	0.131	0.133	0.134	0.136	0.137	0.139
	C9	0.108	0.108	0.109	0.109	0.109	0.109	0.109	0.109	0.109	0.11	0.11	0.11	0.11	0.111	0.111	0.112	0.112	0.113	0.113	0.113	0.114	0.114	0.114	0.115	0.115	0.115	0.116	0.117	0.117	0.118	0.119	0.12	0.121	0.121	0.122	0.123	0.124	0.125	0.126	0.128	0.129	0.13	0.132	0.133	0.135	0.136	0.138	0.14
	C10	0.107	0.107	0.107	0.107	0.107	0.107	0.107	0.107	0.106	0.107	0.106	0.106	0.107	0.107	0.107	0.107	0.107	0.107	0.108	0.108	0.108	0.108	0.108	0.108	0.109	0.109	0.109	0.11	0.11	0.11	0.111	0.111	0.111	0.112	0.112	0.113	0.113	0.114	0.115	0.115	0.116	0.117	0.117	0.118	0.119	0.12	0.121	0.122
	C11	0.107	0.107	0.107	0.107	0.107	0.107	0.107	0.107	0.107	0.107	0.107	0.107	0.107	0.108	0.108	0.108	0.108	0.109	0.109	0.109	0.11	0.11	0.11	0.11	0.111	0.111	0.111	0.112	0.113	0.113	0.114	0.114	0.115	0.116	0.116	0.117	0.118	0.119	0.12	0.12	0.121	0.123	0.124	0.125	0.126	0.127	0.129	0.13
	C12	0.107	0.107	0.107	0.107	0.107	0.107	0.107	0.107	0.107	0.107	0.107	0.107	0.108	0.108	0.108	0.108	0.109	0.109	0.109	0.109	0.11	0.11	0.11	0.111	0.111	0.112	0.112	0.113	0.113	0.114	0.114	0.115	0.116	0.116	0.117	0.118	0.119	0.12	0.121	0.122	0.122	0.124	0.125	0.126	0.128	0.129	0.13	0.132
	D1	0.106	0.107	0.107	0.107	0.107	0.107	0.107	0.107	0.107	0.107	0.107	0.107	0.107	0.108	0.108	0.108	0.108	0.108	0.109	0.109	0.109	0.109	0.109	0.11	0.11	0.11	0.11	0.111	0.111	0.112	0.112	0.112	0.113	0.113	0.114	0.114	0.115	0.115	0.116	0.117	0.117	0.118	0.119	0.119	0.12	0.121	0.122	0.123
	D2	0.109	0.11	0.109	0.11	0.11	0.11	0.11	0.11	0.109	0.109	0.109	0.109	0.109	0.11	0.11	0.11	0.11	0.11	0.111	0.111	0.111	0.111	0.111	0.112	0.112	0.112	0.113	0.113	0.114	0.114	0.114	0.115	0.115	0.116	0.116	0.117	0.117	0.118	0.118	0.119	0.12	0.121	0.121	0.122	0.123	0.124	0.125	0.126
	D3	0.11	0.11	0.11	0.11	0.111	0.11	0.11	0.11	0.11	0.11	0.11	0.11	0.11	0.111	0.111	0.111	0.111	0.111	0.112	0.112	0.112	0.112	0.112	0.112	0.113	0.113	0.113	0.114	0.114	0.114	0.115	0.115	0.116	0.116	0.117	0.117	0.118	0.118	0.119	0.12	0.12	0.121	0.122	0.123	0.124	0.124	0.125	0.126
	D4	0.107	0.107	0.107	0.108	0.108	0.107	0.108	0.107	0.108	0.107	0.107	0.108	0.108	0.108	0.108	0.108	0.108	0.109	0.109	0.109	0.11	0.11	0.11	0.11	0.111	0.111	0.111	0.112	0.112	0.113	0.113	0.113	0.114	0.114	0.115	0.115	0.116	0.117	0.118	0.118	0.119	0.12	0.12	0.121	0.122	0.123	0.124	0.125
	D5	0.108	0.108	0.108	0.107	0.107	0.108	0.107	0.108	0.107	0.107	0.107	0.108	0.108	0.108	0.108	0.108	0.108	0.109	0.109	0.109	0.109	0.109	0.11	0.11	0.11	0.11	0.111	0.111	0.112	0.112	0.112	0.113	0.113	0.114	0.114	0.115	0.115	0.116	0.117	0.117	0.118	0.119	0.12	0.12	0.121	0.122	0.123	0.124
	D6	0.107	0.107	0.107	0.107	0.107	0.107	0.107	0.107	0.107	0.107	0.107	0.107	0.107	0.107	0.108	0.108	0.108	0.108	0.108	0.109	0.109	0.109	0.109	0.11	0.11	0.11	0.111	0.111	0.111	0.112	0.112	0.113	0.113	0.114	0.114	0.114	0.115	0.116	0.116	0.117	0.118	0.119	0.119	0.12	0.121	0.122	0.123	0.124
	D7	0.11	0.109	0.109	0.109	0.109	0.109	0.109	0.108	0.109	0.108	0.109	0.109	0.109	0.109	0.109	0.109	0.109	0.11	0.11	0.11	0.11	0.11	0.11	0.111	0.111	0.111	0.111	0.112	0.112	0.113	0.113	0.113	0.114	0.114	0.115	0.115	0.116	0.116	0.117	0.117	0.118	0.119	0.12	0.12	0.121	0.122	0.123	0.124
	D8	0.108	0.108	0.108	0.108	0.108	0.108	0.108	0.108	0.107	0.108	0.107	0.108	0.108	0.108	0.108	0.109	0.109	0.109	0.11	0.11	0.11	0.11	0.11	0.11	0.111	0.111	0.111	0.112	0.112	0.113	0.113	0.114	0.114	0.115	0.115	0.116	0.116	0.117	0.118	0.119	0.119	0.12	0.121	0.122	0.123	0.124	0.125	0.126
	D9	0.108	0.107	0.108	0.107	0.108	0.107	0.107	0.107	0.107	0.107	0.107	0.107	0.107	0.107	0.108	0.108	0.107	0.108	0.108	0.108	0.108	0.108	0.108	0.109	0.109	0.109	0.109	0.11	0.11	0.11	0.111	0.111	0.112	0.112	0.113	0.113	0.114	0.114	0.115	0.115	0.116	0.117	0.117	0.118	0.119	0.12	0.12	0.121
	D10	0.107	0.107	0.107	0.107	0.107	0.107	0.107	0.107	0.107	0.107	0.107	0.107	0.107	0.107	0.108	0.108	0.108	0.108	0.108	0.108	0.109	0.109	0.109	0.109	0.109	0.11	0.11	0.11	0.111	0.111	0.111	0.112	0.112	0.113	0.113	0.113	0.114	0.115	0.115	0.116	0.117	0.117	0.118	0.119	0.12	0.121	0.121	0.122
	D11	0.107	0.107	0.107	0.107	0.107	0.107	0.107	0.107	0.106	0.106	0.106	0.107	0.106	0.107	0.107	0.107	0.107	0.107	0.107	0.107	0.108	0.107	0.108	0.108	0.108	0.108	0.109	0.109	0.11	0.11	0.11	0.111	0.111	0.112	0.112	0.112	0.113	0.114	0.114	0.115	0.116	0.117	0.117	0.118	0.119	0.12	0.121	0.122
	D12	0.109	0.109	0.108	0.108	0.108	0.108	0.107	0.107	0.107	0.107	0.107	0.107	0.106	0.106	0.106	0.106	0.106	0.106	0.106	0.106	0.106	0.106	0.106	0.106	0.106	0.106	0.106	0.106	0.106	0.107	0.107	0.107	0.107	0.107	0.108	0.108	0.108	0.109	0.109	0.109	0.11	0.11	0.111	0.111	0.111	0.112	0.112	0.113
	E1	0.11	0.11	0.11	0.11	0.111	0.111	0.11	0.11	0.111	0.111	0.111	0.111	0.111	0.112	0.112	0.112	0.112	0.113	0.113	0.113	0.114	0.114	0.114	0.115	0.115	0.115	0.116	0.117	0.117	0.118	0.119	0.119	0.12	0.121	0.122	0.123	0.123	0.125	0.126	0.127	0.128	0.129	0.131	0.132	0.133	0.135	0.137	0.138
	E2	0.11	0.11	0.11	0.11	0.11	0.111	0.111	0.111	0.111	0.112	0.111	0.112	0.112	0.113	0.113	0.114	0.114	0.115	0.115	0.116	0.117	0.117	0.117	0.118	0.119	0.119	0.12	0.121	0.122	0.123	0.124	0.125	0.126	0.127	0.128	0.129	0.131	0.132	0.133	0.135	0.137	0.138	0.14	0.142	0.144	0.146	0.148	0.15
	E3	0.11	0.11	0.11	0.111	0.11	0.11	0.11	0.111	0.111	0.111	0.111	0.112	0.112	0.112	0.113	0.114	0.114	0.114	0.115	0.115	0.116	0.116	0.117	0.117	0.118	0.118	0.119	0.12	0.121	0.122	0.122	0.123	0.124	0.125	0.126	0.127	0.128	0.13	0.131	0.132	0.134	0.136	0.137	0.139	0.141	0.142	0.144	0.146
	E4	0.109	0.108	0.108	0.109	0.108	0.108	0.108	0.109	0.108	0.108	0.109	0.109	0.109	0.11	0.11	0.11	0.111	0.111	0.112	0.111	0.112	0.112	0.113	0.113	0.113	0.114	0.114	0.115	0.115	0.116	0.116	0.117	0.117	0.118	0.119	0.119	0.12	0.121	0.122	0.123	0.124	0.125	0.126	0.128	0.129	0.13	0.132	0.133
	E5	0.11	0.11	0.11	0.11	0.11	0.11	0.11	0.11	0.11	0.11	0.11	0.111	0.111	0.111	0.112	0.112	0.113	0.113	0.113	0.114	0.114	0.114	0.115	0.115	0.116	0.116	0.117	0.118	0.118	0.119	0.12	0.121	0.121	0.122	0.123	0.124	0.125	0.126	0.127	0.128	0.13	0.131	0.133	0.134	0.136	0.137	0.139	0.141
	E6	0.11	0.11	0.11	0.11	0.11	0.11	0.11	0.111	0.111	0.111	0.111	0.112	0.112	0.113	0.114	0.114	0.115	0.115	0.116	0.116	0.117	0.117	0.118	0.119	0.119	0.12	0.121	0.122	0.122	0.123	0.124	0.125	0.126	0.128	0.129	0.13	0.131	0.133	0.134	0.136	0.137	0.139	0.141	0.143	0.145	0.147	0.149	0.152
	E7	0.109	0.108	0.109	0.11	0.11	0.11	0.109	0.11	0.11	0.11	0.11	0.111	0.111	0.112	0.112	0.113	0.113	0.114	0.114	0.115	0.116	0.116	0.117	0.117	0.118	0.118	0.119	0.12	0.121	0.122	0.123	0.124	0.125	0.126	0.127	0.128	0.13	0.131	0.132	0.134	0.135	0.137	0.139	0.141	0.143	0.145	0.147	0.149
	E8	0.109	0.109	0.109	0.11	0.11	0.11	0.11	0.11	0.11	0.111	0.111	0.111	0.112	0.112	0.113	0.114	0.114	0.115	0.115	0.116	0.116	0.117	0.117	0.118	0.119	0.119	0.12	0.121	0.122	0.123	0.124	0.124	0.126	0.127	0.128	0.129	0.13	0.131	0.133	0.134	0.136	0.137	0.139	0.141	0.143	0.145	0.147	0.149
	E9	0.109	0.109	0.109	0.11	0.109	0.109	0.109	0.109	0.109	0.11	0.109	0.11	0.11	0.11	0.11	0.111	0.111	0.111	0.112	0.112	0.112	0.112	0.113	0.113	0.114	0.114	0.114	0.115	0.116	0.116	0.117	0.118	0.118	0.119	0.12	0.12	0.121	0.122	0.123	0.124	0.126	0.127	0.128	0.13	0.131	0.132	0.134	0.136
	E10	0.109	0.108	0.108	0.108	0.108	0.108	0.108	0.108	0.107	0.108	0.108	0.108	0.108	0.108	0.108	0.108	0.108	0.109	0.109	0.109	0.11	0.11	0.11	0.11	0.11	0.111	0.111	0.112	0.112	0.113	0.113	0.113	0.114	0.114	0.115	0.115	0.116	0.117	0.117	0.118	0.119	0.12	0.121	0.122	0.123	0.124	0.125	0.126
	E11	0.109	0.109	0.109	0.109	0.109	0.109	0.109	0.109	0.109	0.109	0.108	0.109	0.109	0.109	0.109	0.109	0.11	0.111	0.111	0.11	0.111	0.111	0.111	0.111	0.112	0.112	0.112	0.113	0.113	0.114	0.114	0.115	0.115	0.116	0.116	0.117	0.117	0.118	0.119	0.12	0.12	0.121	0.122	0.123	0.125	0.126	0.127	0.128
	E12	0.108	0.108	0.108	0.108	0.108	0.108	0.109	0.109	0.109	0.109	0.109	0.11	0.11	0.111	0.111	0.111	0.112	0.112	0.113	0.113	0.114	0.114	0.114	0.115	0.116	0.116	0.117	0.118	0.118	0.119	0.12	0.121	0.122	0.123	0.124	0.124	0.125	0.127	0.128	0.129	0.131	0.132	0.134	0.135	0.137	0.138	0.14	0.142
	F1	0.111	0.111	0.111	0.111	0.111	0.112	0.111	0.112	0.112	0.112	0.112	0.113	0.113	0.114	0.114	0.114	0.115	0.115	0.115	0.116	0.116	0.117	0.117	0.118	0.118	0.119	0.119	0.12	0.121	0.121	0.122	0.123	0.124	0.125	0.126	0.127	0.128	0.129	0.13	0.131	0.132	0.134	0.135	0.136	0.138	0.139	0.141	0.143
	F2	0.11	0.11	0.111	0.111	0.111	0.111	0.111	0.112	0.112	0.112	0.112	0.112	0.113	0.113	0.114	0.114	0.115	0.116	0.116	0.116	0.117	0.117	0.118	0.118	0.119	0.12	0.12	0.121	0.122	0.123	0.124	0.125	0.125	0.127	0.127	0.128	0.13	0.131	0.132	0.134	0.135	0.137	0.138	0.14	0.142	0.143	0.145	0.147
	F3	0.111	0.11	0.11	0.111	0.111	0.111	0.111	0.112	0.111	0.112	0.112	0.113	0.113	0.114	0.114	0.115	0.115	0.116	0.116	0.117	0.118	0.118	0.118	0.119	0.12	0.12	0.121	0.122	0.122	0.123	0.124	0.125	0.126	0.127	0.128	0.129	0.13	0.131	0.132	0.134	0.135	0.137	0.138	0.14	0.142	0.143	0.145	0.147
	F4	0.11	0.11	0.11	0.111	0.111	0.111	0.11	0.11	0.11	0.11	0.11	0.11	0.11	0.111	0.111	0.111	0.111	0.111	0.112	0.112	0.112	0.112	0.112	0.112	0.112	0.113	0.113	0.114	0.116	0.114	0.115	0.115	0.116	0.116	0.117	0.117	0.118	0.12	0.119	0.12	0.121	0.122	0.122	0.123	0.124	0.126	0.126	0.127
	F5	0.111	0.111	0.111	0.111	0.112	0.112	0.111	0.112	0.112	0.112	0.112	0.113	0.113	0.114	0.114	0.114	0.115	0.115	0.116	0.116	0.117	0.117	0.117	0.118	0.118	0.119	0.119	0.12	0.12	0.121	0.122	0.123	0.123	0.124	0.125	0.126	0.127	0.128	0.129	0.13	0.131	0.133	0.134	0.136	0.137	0.139	0.14	0.142
	F6	0.113	0.113	0.113	0.113	0.113	0.113	0.113	0.113	0.113	0.113	0.113	0.113	0.114	0.114	0.115	0.115	0.115	0.116	0.116	0.117	0.117	0.117	0.118	0.118	0.119	0.119	0.119	0.12	0.121	0.121	0.122	0.123	0.123	0.124	0.125	0.126	0.127	0.128	0.129	0.13	0.131	0.132	0.133	0.134	0.136	0.137	0.139	0.14
	F7	0.109	0.109	0.109	0.11	0.11	0.11	0.11	0.11	0.11	0.11	0.111	0.111	0.113	0.114	0.114	0.115	0.115	0.116	0.117	0.117	0.117	0.118	0.118	0.119	0.12	0.12	0.121	0.121	0.122	0.123	0.124	0.125	0.125	0.127	0.127	0.128	0.129	0.13	0.131	0.133	0.134	0.135	0.137	0.138	0.14	0.141	0.143	0.144
	F8	0.109	0.108	0.108	0.109	0.109	0.109	0.109	0.109	0.109	0.109	0.109	0.11	0.11	0.11	0.111	0.111	0.111	0.112	0.112	0.112	0.113	0.113	0.114	0.114	0.114	0.115	0.115	0.116	0.116	0.117	0.118	0.118	0.119	0.119	0.12	0.121	0.122	0.123	0.124	0.125	0.126	0.127	0.128	0.129	0.13	0.131	0.132	0.134
	F9	0.109	0.109	0.109	0.109	0.108	0.108	0.108	0.108	0.107	0.107	0.107	0.107	0.108	0.108	0.107	0.107	0.107	0.108	0.108	0.108	0.108	0.108	0.108	0.108	0.109	0.109	0.109	0.109	0.11	0.11	0.11	0.11	0.111	0.111	0.112	0.112	0.112	0.113	0.113	0.114	0.114	0.115	0.116	0.116	0.117	0.118	0.119	0.12
	F10	0.111	0.111	0.111	0.11	0.111	0.111	0.111	0.111	0.111	0.111	0.112	0.112	0.112	0.113	0.113	0.113	0.114	0.114	0.115	0.115	0.116	0.116	0.117	0.117	0.117	0.118	0.119	0.119	0.12	0.121	0.121	0.122	0.123	0.124	0.124	0.125	0.126	0.127	0.128	0.129	0.131	0.132	0.133	0.134	0.136	0.137	0.139	0.14
	F11	0.11	0.111	0.111	0.111	0.111	0.111	0.111	0.112	0.111	0.111	0.112	0.112	0.112	0.113	0.113	0.114	0.114	0.115	0.115	0.115	0.116	0.116	0.117	0.117	0.118	0.118	0.119	0.12	0.12	0.121	0.121	0.122	0.123	0.124	0.125	0.125	0.126	0.127	0.128	0.13	0.131	0.132	0.133	0.134	0.136	0.137	0.139	0.141
	F12	0.109	0.109	0.109	0.109	0.109	0.109	0.11	0.11	0.11	0.11	0.111	0.111	0.111	0.112	0.112	0.113	0.113	0.114	0.114	0.115	0.115	0.116	0.116	0.117	0.117	0.117	0.118	0.119	0.119	0.12	0.121	0.122	0.122	0.123	0.124	0.125	0.126	0.127	0.128	0.129	0.131	0.132	0.133	0.135	0.136	0.138	0.139	0.141
	G1	0.108	0.108	0.108	0.108	0.108	0.108	0.108	0.108	0.109	0.109	0.109	0.109	0.109	0.109	0.11	0.11	0.11	0.11	0.111	0.111	0.111	0.111	0.111	0.112	0.112	0.112	0.113	0.113	0.114	0.114	0.114	0.115	0.115	0.116	0.116	0.117	0.117	0.118	0.118	0.119	0.119	0.12	0.121	0.122	0.123	0.123	0.124	0.125
	G2	0.108	0.108	0.108	0.108	0.108	0.108	0.108	0.109	0.109	0.109	0.109	0.11	0.11	0.11	0.11	0.11	0.111	0.111	0.111	0.112	0.112	0.112	0.112	0.113	0.113	0.113	0.114	0.114	0.115	0.115	0.115	0.116	0.117	0.117	0.118	0.118	0.119	0.12	0.12	0.121	0.122	0.122	0.123	0.124	0.125	0.126	0.127	0.128
	G3	0.108	0.107	0.107	0.108	0.108	0.108	0.108	0.108	0.109	0.109	0.109	0.109	0.11	0.11	0.11	0.11	0.11	0.111	0.111	0.111	0.112	0.112	0.112	0.113	0.113	0.113	0.113	0.114	0.114	0.115	0.115	0.116	0.116	0.117	0.117	0.117	0.118	0.119	0.119	0.12	0.121	0.122	0.122	0.123	0.124	0.125	0.126	0.127
	G4	0.107	0.107	0.108	0.108	0.108	0.108	0.108	0.108	0.108	0.108	0.108	0.108	0.108	0.109	0.109	0.109	0.109	0.109	0.11	0.11	0.11	0.11	0.11	0.11	0.111	0.111	0.111	0.111	0.112	0.112	0.112	0.113	0.113	0.113	0.114	0.114	0.115	0.115	0.116	0.116	0.117	0.117	0.118	0.118	0.119	0.119	0.12	0.121
	G5	0.107	0.107	0.107	0.107	0.107	0.107	0.107	0.107	0.107	0.107	0.107	0.107	0.108	0.108	0.108	0.108	0.108	0.109	0.109	0.109	0.109	0.11	0.11	0.11	0.11	0.11	0.111	0.111	0.111	0.112	0.112	0.112	0.113	0.113	0.114	0.114	0.114	0.115	0.115	0.116	0.116	0.117	0.118	0.118	0.119	0.12	0.12	0.121
	G6	0.108	0.108	0.108	0.108	0.108	0.109	0.109	0.109	0.109	0.109	0.109	0.109	0.109	0.11	0.11	0.111	0.111	0.111	0.111	0.112	0.112	0.112	0.113	0.113	0.113	0.113	0.114	0.114	0.115	0.115	0.115	0.116	0.116	0.117	0.117	0.118	0.118	0.119	0.119	0.12	0.121	0.121	0.122	0.123	0.124	0.125	0.125	0.126
	G7	0.107	0.106	0.107	0.107	0.107	0.107	0.107	0.107	0.106	0.107	0.107	0.107	0.107	0.107	0.107	0.107	0.107	0.107	0.108	0.108	0.108	0.108	0.108	0.108	0.109	0.109	0.109	0.109	0.109	0.11	0.11	0.11	0.111	0.111	0.111	0.112	0.112	0.113	0.113	0.114	0.114	0.115	0.115	0.116	0.116	0.117	0.117	0.118
	G8	0.106	0.106	0.106	0.106	0.107	0.106	0.106	0.106	0.106	0.106	0.106	0.106	0.106	0.106	0.106	0.107	0.107	0.107	0.107	0.107	0.107	0.107	0.107	0.107	0.108	0.108	0.108	0.108	0.108	0.109	0.109	0.109	0.11	0.11	0.11	0.111	0.111	0.111	0.112	0.113	0.113	0.113	0.114	0.114	0.115	0.116	0.116	0.117
	G9	0.11	0.11	0.11	0.11	0.11	0.11	0.11	0.11	0.11	0.11	0.11	0.11	0.11	0.11	0.11	0.11	0.11	0.111	0.111	0.111	0.111	0.111	0.111	0.112	0.111	0.112	0.112	0.112	0.112	0.113	0.113	0.113	0.113	0.114	0.114	0.114	0.115	0.115	0.115	0.116	0.116	0.117	0.117	0.118	0.118	0.118	0.119	0.12
	G10	0.109	0.108	0.108	0.108	0.108	0.108	0.108	0.108	0.108	0.108	0.108	0.108	0.108	0.108	0.109	0.109	0.109	0.109	0.109	0.11	0.11	0.11	0.11	0.11	0.11	0.111	0.111	0.111	0.111	0.112	0.112	0.112	0.113	0.113	0.113	0.114	0.114	0.115	0.115	0.116	0.116	0.117	0.117	0.118	0.118	0.119	0.119	0.12
	G11	0.106	0.106	0.106	0.107	0.107	0.107	0.106	0.107	0.107	0.107	0.107	0.107	0.107	0.107	0.107	0.107	0.107	0.107	0.107	0.107	0.108	0.108	0.108	0.108	0.108	0.108	0.108	0.109	0.109	0.109	0.109	0.11	0.11	0.11	0.11	0.111	0.111	0.111	0.112	0.112	0.112	0.113	0.113	0.114	0.114	0.115	0.115	0.116
	G12	0.106	0.107	0.107	0.107	0.107	0.107	0.107	0.107	0.107	0.107	0.107	0.107	0.107	0.107	0.108	0.108	0.108	0.108	0.109	0.108	0.109	0.109	0.109	0.109	0.109	0.11	0.11	0.11	0.11	0.111	0.111	0.111	0.112	0.112	0.112	0.112	0.113	0.113	0.114	0.114	0.115	0.115	0.116	0.117	0.117	0.118	0.118	0.119
	H1	0.089	0.089	0.089	0.089	0.089	0.089	0.089	0.089	0.089	0.089	0.089	0.089	0.089	0.089	0.089	0.089	0.089	0.089	0.089	0.089	0.089	0.089	0.089	0.089	0.089	0.089	0.089	0.089	0.089	0.089	0.089	0.089	0.089	0.089	0.089	0.089	0.089	0.089	0.089	0.089	0.089	0.089	0.089	0.089	0.089	0.089	0.089	0.089
	H2	0.09	0.09	0.09	0.09	0.09	0.09	0.09	0.09	0.09	0.09	0.09	0.09	0.09	0.09	0.09	0.09	0.09	0.09	0.09	0.09	0.09	0.09	0.09	0.09	0.09	0.09	0.09	0.09	0.09	0.09	0.09	0.09	0.09	0.09	0.09	0.09	0.09	0.09	0.09	0.09	0.09	0.09	0.09	0.09	0.09	0.09	0.09	0.09
	H3	0.092	0.092	0.092	0.092	0.092	0.092	0.092	0.092	0.092	0.092	0.092	0.092	0.092	0.092	0.092	0.092	0.092	0.092	0.092	0.092	0.092	0.092	0.092	0.092	0.092	0.092	0.092	0.092	0.092	0.092	0.092	0.092	0.092	0.092	0.092	0.092	0.092	0.092	0.092	0.092	0.092	0.092	0.092	0.092	0.092	0.092	0.092	0.092
	H4	0.09	0.09	0.09	0.09	0.09	0.09	0.09	0.09	0.089	0.09	0.089	0.089	0.09	0.09	0.09	0.09	0.089	0.09	0.09	0.09	0.09	0.09	0.089	0.089	0.09	0.09	0.089	0.09	0.09	0.09	0.089	0.09	0.089	0.089	0.089	0.089	0.09	0.089	0.09	0.09	0.089	0.089	0.089	0.089	0.09	0.089	0.09	0.089
	H5	0.09	0.09	0.09	0.09	0.09	0.09	0.09	0.09	0.09	0.09	0.09	0.09	0.09	0.09	0.09	0.09	0.09	0.09	0.09	0.09	0.09	0.09	0.09	0.09	0.09	0.09	0.092	0.092	0.092	0.092	0.092	0.092	0.092	0.093	0.093	0.092	0.093	0.093	0.093	0.093	0.093	0.093	0.093	0.093	0.093	0.093	0.093	0.093
	H6	0.09	0.089	0.089	0.09	0.089	0.089	0.089	0.089	0.089	0.089	0.089	0.089	0.089	0.089	0.089	0.089	0.089	0.089	0.09	0.089	0.09	0.089	0.089	0.089	0.089	0.089	0.089	0.089	0.089	0.089	0.089	0.089	0.089	0.089	0.089	0.089	0.089	0.089	0.089	0.089	0.089	0.089	0.089	0.089	0.09	0.089	0.089	0.089
	H7	0.09	0.09	0.09	0.09	0.09	0.09	0.09	0.09	0.09	0.09	0.09	0.09	0.09	0.09	0.09	0.09	0.09	0.09	0.09	0.09	0.09	0.09	0.09	0.09	0.09	0.09	0.09	0.09	0.09	0.09	0.09	0.09	0.09	0.09	0.09	0.09	0.09	0.09	0.09	0.09	0.09	0.09	0.09	0.09	0.09	0.09	0.09	0.09
	H8	0.089	0.089	0.089	0.089	0.089	0.089	0.089	0.089	0.089	0.089	0.089	0.089	0.089	0.089	0.089	0.089	0.089	0.089	0.089	0.089	0.089	0.089	0.089	0.089	0.089	0.089	0.089	0.089	0.089	0.089	0.089	0.089	0.089	0.089	0.089	0.089	0.089	0.089	0.089	0.089	0.089	0.089	0.089	0.089	0.089	0.089	0.089	0.089
	H9	0.09	0.09	0.09	0.09	0.09	0.09	0.09	0.09	0.09	0.09	0.09	0.09	0.09	0.09	0.09	0.09	0.09	0.09	0.09	0.09	0.09	0.09	0.09	0.09	0.09	0.09	0.09	0.09	0.09	0.09	0.09	0.09	0.09	0.09	0.09	0.09	0.09	0.09	0.09	0.09	0.09	0.09	0.09	0.09	0.09	0.09	0.09	0.09
	H10	0.089	0.089	0.089	0.089	0.089	0.089	0.089	0.089	0.089	0.089	0.089	0.089	0.089	0.089	0.089	0.089	0.089	0.089	0.089	0.089	0.089	0.089	0.089	0.089	0.089	0.089	0.089	0.089	0.089	0.089	0.089	0.089	0.089	0.089	0.089	0.089	0.089	0.089	0.089	0.089	0.089	0.089	0.089	0.089	0.089	0.089	0.089	0.089
	H11	0.089	0.088	0.088	0.089	0.088	0.088	0.088	0.088	0.088	0.088	0.088	0.088	0.088	0.088	0.088	0.088	0.088	0.088	0.089	0.088	0.088	0.088	0.088	0.088	0.088	0.088	0.088	0.088	0.088	0.088	0.088	0.088	0.088	0.088	0.088	0.088	0.088	0.088	0.088	0.088	0.088	0.088	0.088	0.088	0.088	0.088	0.088	0.088
	H12	0.089	0.089	0.089	0.089	0.089	0.089	0.089	0.089	0.089	0.089	0.089	0.089	0.089	0.089	0.089	0.089	0.089	0.089	0.089	0.089	0.089	0.089	0.089	0.089	0.089	0.089	0.089	0.089	0.089	0.089	0.089	0.089	0.089	0.089	0.089	0.089	0.089	0.089	0.089	0.089	0.089	0.089	0.089	0.089	0.089	0.089	0.089	0.089
Results
		1	2	3	4	5	6	7	8	9	10	11	12
	A	0.04	-0.06	-0.06	0.06	-0.04	-0.04	0.06	0.04	0.04	0.06	-0.08	-0.04	Max V [Read 2:600]
		1	1	1	1	1	1	1	1	1	1	1	1	R-Squared [Read 2:600]
		03:41:46	19:26:46	06:21:46	05:11:46	05:21:46	05:06:46	14:06:46	19:41:46	01:31:46	05:11:46	05:06:46	00:26:46	t at Max V [Read 2:600]
		03:46:46	19:29:16	06:17:36	05:15:56	05:14:16	04:59:16	14:07:36	19:44:16	01:31:46	05:15:56	05:03:01	00:21:46	Lagtime [Read 2:600]
	B	3.82	3.94	3.9	3.86	3.96	4.12	4.78	4.92	4.8	5.58	5.56	6.16	Max V [Read 2:600]
		1	1	1	1	1	1	1	1	1	1	1	1	R-Squared [Read 2:600]
		09:41:46	08:41:46	09:16:46	10:01:46	09:26:46	09:31:46	10:06:46	09:31:46	09:31:46	09:31:46	08:56:46	10:06:46	t at Max V [Read 2:600]
		06:34:58	06:29:19	06:25:05	06:27:47	06:37:47	06:38:08	07:25:11	07:21:20	07:27:04	07:57:06	07:36:51	08:06:11	Lagtime [Read 2:600]
	C	3.74	3.84	3.76	3.92	4.08	4.48	4.22	4.62	4.88	5.2	5.18	5.64	Max V [Read 2:600]
		1	1	1	1	1	1	1	1	1	1	1	1	R-Squared [Read 2:600]
		10:41:46	09:06:46	09:41:46	09:41:46	10:06:46	11:56:46	08:56:46	08:56:46	09:31:46	10:06:46	08:56:46	09:31:46	t at Max V [Read 2:600]
		07:04:38	06:33:12	07:05:02	07:02:58	07:38:57	08:25:31	06:51:38	07:01:26	07:09:18	08:12:17	07:21:26	07:38:28	Lagtime [Read 2:600]
	D	3.74	3.62	3.82	4.14	4.08	4.3	4.38	4.66	4.52	4.8	4.88	5.24	Max V [Read 2:600]
		1	1	1	1	1	1	1	1	1	1	1	1	R-Squared [Read 2:600]
		10:26:46	11:06:46	10:36:46	11:56:46	11:56:46	11:56:46	10:06:46	09:31:46	10:51:46	09:31:46	11:56:46	11:56:46	t at Max V [Read 2:600]
		07:46:24	07:42:23	07:51:04	08:12:08	08:18:26	08:24:43	08:00:55	07:48:36	08:23:23	08:01:24	08:46:05	09:44:06	Lagtime [Read 2:600]
	E	3.72	3.86	3.86	3.78	4.1	3.86	4.28	4.32	4.18	4.4	4.58	3.84	Max V [Read 2:600]
		1	1	1	1	1	1	1	1	1	1	1	1	R-Squared [Read 2:600]
		09:06:46	08:51:46	09:11:46	09:56:46	09:16:46	08:36:46	10:06:46	09:31:46	10:01:46	10:06:46	10:51:46	09:41:46	t at Max V [Read 2:600]
		06:29:26	06:05:29	06:17:30	06:50:23	06:38:26	06:01:44	06:39:48	06:33:27	06:59:16	07:38:35	07:53:46	06:25:26	Lagtime [Read 2:600]
	F	3.76	3.74	3.7	3.7	3.66	3.62	3.88	3.92	3.88	4	4.06	3.96	Max V [Read 2:600]
		1	1	1	1	1	1	1	1	1	1	1	1	R-Squared [Read 2:600]
		08:46:46	09:06:46	09:06:46	10:21:46	09:51:46	10:41:46	09:11:46	09:31:46	10:46:46	09:31:46	09:31:46	09:06:46	t at Max V [Read 2:600]
		06:34:57	06:22:45	06:23:03	07:29:19	06:38:22	06:48:40	06:43:51	07:05:52	08:05:40	06:56:00	06:57:49	06:49:10	Lagtime [Read 2:600]
	G	3.96	3.62	3.78	3.7	3.62	3.8	3.82	3.8	3.74	3.76	3.92	3.8	Max V [Read 2:600]
		1	1	1	1	1	1	1	1	1	1	1	1	R-Squared [Read 2:600]
		11:21:46	10:31:46	11:26:46	12:16:46	12:16:46	11:11:46	11:31:46	12:16:46	12:21:46	11:11:46	12:01:46	11:41:46	t at Max V [Read 2:600]
		08:30:56	07:54:11	08:11:01	08:43:13	08:38:15	08:15:02	08:52:56	08:59:48	09:04:37	08:41:32	09:11:37	08:42:59	Lagtime [Read 2:600]
	H	-0.06	0.06	0.04	0.04	0.26	-0.04	0.06	-0.04	0.06	-0.04	0.04	0.06	Max V [Read 2:600]
		1	1	1	1	1	1	1	1	1	1	1	1	R-Squared [Read 2:600]
		02:56:46	03:01:46	05:11:46	05:11:46	02:11:46	05:06:46	05:11:46	15:26:46	05:11:46	05:06:46	01:31:46	06:41:46	t at Max V [Read 2:600]
		02:55:56	03:04:16	05:16:46	05:19:16	02:09:16	05:01:46	05:10:56	15:24:16	05:14:16	04:59:16	01:34:16	06:44:16	Lagtime [Read 2:600]
[truncated: 385 more columns]

## Sheet: Rep 2 Doubling times
Inf	Inf	-3.62189e+06	Inf	-4.44138e+06	1.83622e+06	Inf	Inf	Inf	-2.26318e+06	Inf	484303
135.5	135.119	133.998	135.13	135.353	133.505	136.182	135.905	137.269	139.566	136.729	134.199	WT	134.768	136.642
135.594	134.344	138.234	135.339	138.782	140.178	134.65	136.243	133.882	138.34	133.098	133.776	V410I	137.079	134.998
143.897	145.903	146.602	144.127	145.798	144.431	142.449	140.687	143.746	141.257	140.976	147.931	V410A	145.127	142.841
134.955	131.753	133.416	135.666	133.81	131.636	132.966	132.479	134.458	138.233	138.869	132.819	R403H	133.539	134.971
139.305	137.928	138.346	144.158	140.234	141.097	140.322	139.34	143.451	139.875	139.245	139.398	R403C	140.178	140.272
153.399	151.839	150.868	154.216	154.987	152.927	153.908	152.755	156.621	152.218	153.43	150.981	V410D	153.039	153.319
Inf	Inf	Inf	251308	36423.3	108309	Inf	Inf	6.72585e+06	Inf	-1.66554e+07	Inf
Normalized to WT for that set
1.00543	1.00261	0.99429	1.00269	1.00434	0.990634	0.996632	0.99461	1.00459	1.0214	1.00064	0.982125	WT	1	1
1.00613	0.996861	1.02572	1.00424	1.02979	1.04014	0.985422	0.997081	0.979805	1.01243	0.974068	0.97903	V410I	1.01715	0.987972
1.06774	1.08263	1.08782	1.06945	1.08185	1.0717	1.0425	1.0296	1.05199	1.03377	1.03172	1.08262	V410A	1.07687	1.04537
												R403H	0.990885	0.987771
												R403C	1.04015	1.02657
1.13825	1.12667	1.11947	1.14431	1.15003	1.13475	1.12636	1.11792	1.14622	1.11399	1.12286	1.10494	V410D	1.13558	1.12205

## Sheet: Rep 3 Plate 1 - Sheet1
Software Version	3.10.06
Experiment File Path:
Protocol File Path:	C:\Users\Moore Lab Plate Read\Desktop\Protocols\Liquid Growth Assay Modified CF.prt
Plate Number	Plate 1
Date	2021-09-01
Time	15:31:56
Reader Type:	Epoch 2
Reader Serial Number:	200916F
Reading Type	Reader
Procedure Details
Plate Type	96 WELL PLATE (Use plate lid)
Well Selection	Runtime
Eject plate on completion
Set Temperature	Setpoint 30°C, Gradient 0 °C
	Preheat before moving to next step
Read	Absorbance Endpoint
	Full Plate
	Wavelengths: 600
	Read Speed: Normal, Delay: 100 msec, Measurements/Data Point: 8
Start Kinetic	Runtime 36:00:00 (HH:MM:SS), Interval 0:05:00, 433 Reads
Shake	Orbital: Continuous
	Frequency: 559 cpm (1 mm)
Read	Absorbance Endpoint
	Full Plate
	Wavelengths: 600
	Read Speed: Normal, Delay: 100 msec, Measurements/Data Point: 8
End Kinetic
Plate In
Layout
		1	2	3	4	5	6	7	8	9	10	11	12
	A	SPL1	SPL9	SPL17	SPL25	SPL33	SPL41	SPL49	SPL57	SPL65	SPL73	SPL81	SPL89	Well ID
	B	SPL2	SPL10	SPL18	SPL26	SPL34	SPL42	SPL50	SPL58	SPL66	SPL74	SPL82	SPL90	Well ID
	C	SPL3	SPL11	SPL19	SPL27	SPL35	SPL43	SPL51	SPL59	SPL67	SPL75	SPL83	SPL91	Well ID
	D	SPL4	SPL12	SPL20	SPL28	SPL36	SPL44	SPL52	SPL60	SPL68	SPL76	SPL84	SPL92	Well ID
	E	SPL5	SPL13	SPL21	SPL29	SPL37	SPL45	SPL53	SPL61	SPL69	SPL77	SPL85	SPL93	Well ID
	F	SPL6	SPL14	SPL22	SPL30	SPL38	SPL46	SPL54	SPL62	SPL70	SPL78	SPL86	SPL94	Well ID
	G	SPL7	SPL15	SPL23	SPL31	SPL39	SPL47	SPL55	SPL63	SPL71	SPL79	SPL87	SPL95	Well ID
	H	SPL8	SPL16	SPL24	SPL32	SPL40	SPL48	SPL56	SPL64	SPL72	SPL80	SPL88	SPL96	Well ID
Results
Actual Temperature:	30
		1	2	3	4	5	6	7	8	9	10	11	12
	A	0.092	0.092	0.091	0.092	0.091	0.093	0.09	0.09	0.089	0.09	0.089	0.09	Read 1:600
	B	0.106	0.111	0.108	0.106	0.105	0.109	0.105	0.108	0.106	0.106	0.105	0.105	Read 1:600
	C	0.105	0.11	0.107	0.108	0.107	0.104	0.106	0.105	0.107	0.106	0.105	0.106	Read 1:600
	D	0.105	0.107	0.105	0.106	0.106	0.106	0.106	0.105	0.104	0.105	0.106	0.105	Read 1:600
	E	0.105	0.104	0.106	0.106	0.106	0.106	0.106	0.106	0.107	0.106	0.107	0.105	Read 1:600
	F	0.106	0.108	0.107	0.107	0.107	0.107	0.106	0.106	0.108	0.107	0.106	0.105	Read 1:600
	G	0.104	0.108	0.106	0.11	0.106	0.106	0.105	0.107	0.107	0.105	0.106	0.106	Read 1:600
	H	0.091	0.091	0.092	0.092	0.09	0.089	0.088	0.089	0.089	0.09	0.089	0.09	Read 1:600
Read 2:600
	Time	00:04:16	00:09:16	00:14:16	00:19:16	00:24:16	00:29:16	00:34:16	00:39:16	00:44:16	00:49:16	00:54:16	00:59:16	01:04:16	01:09:16	01:14:16	01:19:16	01:24:16	01:29:16	01:34:16	01:39:16	01:44:16	01:49:16	01:54:16	01:59:16	02:04:16	02:09:16	02:14:16	02:19:16	02:24:16	02:29:16	02:34:16	02:39:16	02:44:16	02:49:16	02:54:16	02:59:16	03:04:16	03:09:16	03:14:16	03:19:16	03:24:16	03:29:16	03:34:16	03:39:16	03:44:16	03:49:16	03:54:16	03:59:16
	T° Read 2:600	30	30	29.9	29.9	30	30	30	30	30	30	30	30	30	30	30	30	30	30	30	30	30	30	30	30	30	30	30	30	30	30	30	30	30.1	30.1	30.1	30.1	30.1	30.1	30.1	30.1	30.1	30.1	30.1	30.1	30.1	30	30.1	30
	A1	0.092	0.092	0.092	0.092	0.092	0.092	0.092	0.092	0.092	0.092	0.092	0.092	0.092	0.092	0.092	0.092	0.092	0.092	0.092	0.092	0.092	0.092	0.092	0.092	0.092	0.092	0.092	0.092	0.092	0.092	0.092	0.092	0.092	0.092	0.092	0.092	0.092	0.092	0.092	0.092	0.092	0.092	0.092	0.092	0.092	0.092	0.092	0.092
	A2	0.092	0.092	0.092	0.092	0.092	0.092	0.092	0.092	0.092	0.092	0.092	0.092	0.092	0.092	0.092	0.092	0.092	0.092	0.092	0.092	0.092	0.092	0.092	0.092	0.092	0.092	0.092	0.092	0.092	0.092	0.092	0.092	0.092	0.092	0.092	0.092	0.092	0.092	0.092	0.092	0.092	0.092	0.092	0.092	0.092	0.092	0.092	0.092
	A3	0.091	0.091	0.091	0.091	0.09	0.091	0.091	0.091	0.091	0.091	0.091	0.09	0.09	0.09	0.09	0.09	0.091	0.091	0.091	0.091	0.09	0.09	0.091	0.09	0.09	0.09	0.091	0.09	0.09	0.09	0.09	0.09	0.09	0.09	0.09	0.09	0.09	0.091	0.09	0.09	0.09	0.09	0.09	0.09	0.09	0.091	0.09	0.09
	A4	0.092	0.092	0.092	0.092	0.092	0.092	0.092	0.092	0.092	0.092	0.092	0.092	0.092	0.092	0.092	0.092	0.092	0.092	0.092	0.092	0.092	0.092	0.092	0.092	0.092	0.092	0.092	0.092	0.092	0.092	0.092	0.092	0.092	0.092	0.092	0.092	0.092	0.092	0.092	0.092	0.092	0.092	0.092	0.092	0.092	0.092	0.092	0.092
	A5	0.09	0.09	0.09	0.09	0.09	0.09	0.09	0.09	0.09	0.09	0.09	0.09	0.09	0.09	0.09	0.09	0.09	0.09	0.09	0.09	0.09	0.09	0.09	0.09	0.09	0.09	0.09	0.09	0.09	0.09	0.09	0.09	0.09	0.09	0.09	0.09	0.09	0.09	0.09	0.09	0.09	0.09	0.09	0.09	0.09	0.09	0.09	0.09
	A6	0.093	0.093	0.093	0.093	0.093	0.093	0.093	0.092	0.093	0.093	0.093	0.092	0.092	0.092	0.093	0.092	0.092	0.092	0.092	0.093	0.092	0.092	0.092	0.092	0.092	0.092	0.093	0.092	0.092	0.092	0.092	0.092	0.092	0.092	0.092	0.092	0.092	0.092	0.092	0.092	0.092	0.093	0.092	0.092	0.092	0.092	0.092	0.092
	A7	0.09	0.09	0.09	0.09	0.089	0.09	0.09	0.09	0.09	0.089	0.089	0.089	0.089	0.089	0.089	0.089	0.09	0.089	0.089	0.089	0.089	0.089	0.089	0.089	0.089	0.089	0.089	0.089	0.089	0.089	0.089	0.089	0.089	0.089	0.089	0.089	0.089	0.09	0.089	0.09	0.089	0.089	0.089	0.089	0.09	0.089	0.089	0.089
	A8	0.09	0.09	0.09	0.09	0.09	0.09	0.09	0.09	0.09	0.09	0.09	0.09	0.09	0.09	0.09	0.09	0.09	0.09	0.09	0.09	0.09	0.09	0.09	0.09	0.09	0.09	0.09	0.09	0.09	0.09	0.09	0.09	0.09	0.09	0.09	0.09	0.09	0.09	0.09	0.09	0.09	0.09	0.09	0.09	0.09	0.09	0.09	0.09
	A9	0.089	0.089	0.089	0.089	0.089	0.089	0.089	0.089	0.089	0.089	0.089	0.089	0.089	0.089	0.089	0.089	0.089	0.089	0.089	0.089	0.089	0.089	0.089	0.089	0.089	0.089	0.089	0.089	0.089	0.089	0.089	0.089	0.089	0.089	0.089	0.089	0.089	0.089	0.089	0.089	0.089	0.089	0.089	0.089	0.089	0.089	0.089	0.089
	A10	0.09	0.09	0.09	0.09	0.09	0.09	0.09	0.09	0.09	0.09	0.09	0.09	0.09	0.09	0.09	0.09	0.09	0.09	0.09	0.09	0.09	0.09	0.09	0.09	0.09	0.09	0.09	0.09	0.09	0.09	0.09	0.09	0.09	0.089	0.09	0.089	0.09	0.09	0.09	0.09	0.09	0.09	0.09	0.09	0.09	0.09	0.09	0.09
	A11	0.089	0.089	0.089	0.089	0.089	0.089	0.089	0.089	0.089	0.089	0.089	0.089	0.089	0.089	0.089	0.089	0.089	0.089	0.089	0.089	0.089	0.088	0.089	0.089	0.089	0.089	0.089	0.088	0.089	0.088	0.089	0.088	0.089	0.088	0.089	0.089	0.089	0.089	0.089	0.089	0.089	0.089	0.089	0.089	0.089	0.089	0.089	0.089
	A12	0.09	0.09	0.09	0.09	0.09	0.09	0.09	0.09	0.09	0.09	0.09	0.09	0.09	0.09	0.09	0.09	0.09	0.09	0.09	0.09	0.09	0.09	0.09	0.09	0.09	0.09	0.09	0.09	0.09	0.09	0.09	0.09	0.09	0.09	0.089	0.09	0.09	0.09	0.09	0.09	0.09	0.09	0.09	0.09	0.09	0.09	0.09	0.09
	B1	0.106	0.105	0.105	0.105	0.105	0.105	0.105	0.105	0.105	0.105	0.105	0.105	0.106	0.106	0.106	0.106	0.107	0.107	0.107	0.107	0.108	0.108	0.108	0.109	0.109	0.11	0.11	0.111	0.111	0.111	0.112	0.113	0.113	0.114	0.115	0.115	0.116	0.117	0.118	0.119	0.12	0.121	0.122	0.123	0.124	0.125	0.127	0.128
	B2	0.111	0.111	0.111	0.111	0.111	0.111	0.111	0.111	0.111	0.111	0.111	0.111	0.111	0.111	0.112	0.112	0.112	0.112	0.112	0.112	0.112	0.113	0.113	0.113	0.114	0.114	0.115	0.115	0.115	0.116	0.116	0.117	0.117	0.118	0.118	0.119	0.12	0.121	0.121	0.122	0.123	0.124	0.125	0.126	0.127	0.128	0.129	0.13
	B3	0.108	0.107	0.108	0.108	0.107	0.107	0.107	0.107	0.107	0.107	0.107	0.107	0.107	0.108	0.108	0.108	0.108	0.109	0.109	0.109	0.109	0.11	0.11	0.11	0.11	0.111	0.111	0.112	0.112	0.113	0.113	0.114	0.114	0.115	0.116	0.116	0.117	0.118	0.119	0.119	0.12	0.121	0.122	0.123	0.124	0.126	0.127	0.128
	B4	0.106	0.106	0.106	0.106	0.106	0.106	0.106	0.105	0.106	0.106	0.106	0.106	0.106	0.106	0.107	0.107	0.107	0.108	0.108	0.108	0.108	0.109	0.109	0.109	0.11	0.11	0.111	0.111	0.112	0.112	0.113	0.113	0.114	0.114	0.115	0.115	0.116	0.117	0.118	0.119	0.12	0.121	0.122	0.123	0.124	0.125	0.126	0.128
	B5	0.106	0.106	0.106	0.106	0.106	0.106	0.105	0.106	0.106	0.106	0.106	0.106	0.106	0.106	0.106	0.106	0.107	0.107	0.107	0.107	0.107	0.107	0.108	0.108	0.108	0.108	0.109	0.109	0.11	0.11	0.111	0.111	0.112	0.112	0.113	0.113	0.114	0.115	0.115	0.116	0.117	0.117	0.118	0.119	0.12	0.121	0.122	0.123
	B6	0.107	0.107	0.107	0.107	0.106	0.106	0.106	0.106	0.106	0.107	0.107	0.107	0.107	0.107	0.108	0.108	0.108	0.108	0.108	0.109	0.109	0.109	0.11	0.11	0.11	0.111	0.111	0.112	0.112	0.112	0.113	0.113	0.114	0.115	0.115	0.116	0.116	0.117	0.118	0.119	0.12	0.121	0.122	0.123	0.124	0.125	0.127	0.128
	B7	0.105	0.105	0.105	0.106	0.106	0.106	0.106	0.106	0.106	0.107	0.107	0.108	0.108	0.109	0.109	0.11	0.11	0.11	0.111	0.112	0.112	0.112	0.113	0.114	0.114	0.115	0.116	0.116	0.117	0.118	0.119	0.12	0.121	0.122	0.123	0.124	0.125	0.127	0.128	0.13	0.131	0.133	0.134	0.136	0.138	0.14	0.142	0.144
	B8	0.107	0.108	0.108	0.108	0.108	0.108	0.108	0.108	0.109	0.109	0.109	0.11	0.111	0.111	0.111	0.112	0.112	0.113	0.113	0.113	0.114	0.114	0.115	0.115	0.116	0.117	0.118	0.118	0.119	0.12	0.121	0.122	0.123	0.124	0.125	0.126	0.128	0.129	0.13	0.132	0.137	0.135	0.137	0.139	0.14	0.143	0.145	0.147
	B9	0.106	0.107	0.108	0.107	0.107	0.107	0.107	0.107	0.108	0.108	0.108	0.108	0.109	0.109	0.11	0.11	0.111	0.112	0.112	0.113	0.113	0.114	0.115	0.115	0.116	0.117	0.118	0.119	0.12	0.12	0.122	0.123	0.124	0.125	0.126	0.127	0.129	0.131	0.132	0.134	0.142	0.137	0.139	0.141	0.143	0.145	0.148	0.15
	B10	0.105	0.106	0.106	0.106	0.106	0.106	0.106	0.106	0.106	0.107	0.107	0.107	0.108	0.108	0.109	0.11	0.11	0.111	0.111	0.112	0.112	0.113	0.113	0.114	0.115	0.116	0.116	0.117	0.118	0.119	0.12	0.121	0.122	0.123	0.124	0.125	0.127	0.128	0.129	0.131	0.141	0.134	0.136	0.138	0.14	0.142	0.144	0.146
	B11	0.105	0.105	0.105	0.106	0.106	0.106	0.106	0.106	0.106	0.107	0.107	0.108	0.108	0.109	0.109	0.11	0.111	0.111	0.112	0.112	0.113	0.113	0.114	0.114	0.115	0.116	0.117	0.118	0.119	0.12	0.121	0.122	0.123	0.124	0.126	0.127	0.128	0.13	0.132	0.133	0.146	0.143	0.139	0.141	0.143	0.145	0.147	0.15
	B12	0.105	0.105	0.105	0.105	0.106	0.106	0.106	0.106	0.106	0.107	0.107	0.107	0.108	0.109	0.109	0.11	0.11	0.111	0.111	0.112	0.112	0.113	0.113	0.114	0.115	0.116	0.117	0.118	0.119	0.12	0.121	0.122	0.123	0.124	0.126	0.127	0.129	0.13	0.132	0.134	0.149	0.137	0.139	0.141	0.143	0.146	0.148	0.151
	C1	0.103	0.104	0.104	0.103	0.104	0.103	0.104	0.104	0.104	0.104	0.104	0.104	0.104	0.104	0.105	0.105	0.105	0.106	0.108	0.106	0.106	0.107	0.107	0.107	0.108	0.108	0.109	0.109	0.11	0.11	0.111	0.112	0.112	0.113	0.114	0.115	0.116	0.117	0.117	0.118	0.12	0.121	0.122	0.124	0.124	0.126	0.127	0.13
	C2	0.107	0.107	0.107	0.107	0.108	0.107	0.107	0.108	0.107	0.107	0.108	0.108	0.108	0.11	0.109	0.109	0.112	0.11	0.11	0.11	0.116	0.111	0.111	0.111	0.112	0.112	0.113	0.114	0.114	0.115	0.116	0.116	0.117	0.118	0.124	0.12	0.12	0.122	0.123	0.124	0.125	0.127	0.128	0.13	0.131	0.133	0.136	0.136
	C3	0.106	0.107	0.106	0.106	0.107	0.107	0.107	0.107	0.107	0.107	0.108	0.108	0.108	0.108	0.109	0.109	0.11	0.11	0.111	0.11	0.111	0.111	0.112	0.112	0.113	0.113	0.114	0.114	0.115	0.116	0.116	0.117	0.118	0.12	0.121	0.125	0.124	0.128	0.127	0.125	0.126	0.128	0.129	0.131	0.132	0.134	0.135	0.137
	C4	0.107	0.107	0.107	0.107	0.107	0.107	0.108	0.11	0.108	0.108	0.108	0.108	0.109	0.109	0.109	0.11	0.11	0.11	0.111	0.112	0.111	0.112	0.112	0.113	0.113	0.114	0.114	0.115	0.116	0.116	0.117	0.118	0.119	0.119	0.121	0.123	0.123	0.125	0.125	0.126	0.128	0.13	0.131	0.132	0.133	0.135	0.136	0.138
	C5	0.107	0.108	0.106	0.106	0.107	0.108	0.106	0.108	0.107	0.107	0.107	0.107	0.107	0.108	0.108	0.108	0.109	0.109	0.109	0.109	0.11	0.11	0.111	0.111	0.111	0.112	0.113	0.113	0.114	0.115	0.115	0.117	0.117	0.117	0.118	0.119	0.12	0.121	0.122	0.123	0.124	0.126	0.127	0.129	0.13	0.132	0.133	0.135
	C6	0.104	0.104	0.104	0.104	0.103	0.103	0.103	0.103	0.104	0.104	0.105	0.104	0.104	0.105	0.105	0.106	0.106	0.106	0.106	0.107	0.107	0.107	0.108	0.108	0.108	0.109	0.11	0.11	0.111	0.112	0.112	0.113	0.113	0.114	0.115	0.116	0.117	0.118	0.119	0.12	0.121	0.122	0.123	0.124	0.126	0.127	0.128	0.13
	C7	0.106	0.106	0.106	0.106	0.106	0.106	0.106	0.106	0.106	0.106	0.106	0.107	0.107	0.107	0.107	0.108	0.108	0.108	0.108	0.108	0.108	0.109	0.109	0.11	0.11	0.11	0.111	0.111	0.112	0.112	0.113	0.113	0.114	0.114	0.115	0.116	0.117	0.118	0.118	0.119	0.123	0.121	0.122	0.123	0.125	0.126	0.127	0.129
	C8	0.105	0.105	0.105	0.105	0.105	0.105	0.105	0.105	0.105	0.105	0.105	0.105	0.105	0.105	0.106	0.106	0.106	0.106	0.106	0.106	0.107	0.107	0.107	0.107	0.107	0.108	0.108	0.108	0.109	0.109	0.109	0.11	0.11	0.111	0.111	0.112	0.113	0.113	0.114	0.115	0.12	0.116	0.117	0.117	0.118	0.12	0.121	0.121
	C9	0.107	0.106	0.106	0.106	0.106	0.106	0.106	0.105	0.105	0.105	0.106	0.105	0.105	0.105	0.105	0.105	0.105	0.105	0.105	0.105	0.105	0.105	0.106	0.106	0.106	0.106	0.106	0.106	0.107	0.107	0.107	0.108	0.108	0.108	0.109	0.109	0.11	0.11	0.111	0.112	0.117	0.112	0.113	0.114	0.114	0.115	0.116	0.117
	C10	0.106	0.106	0.106	0.105	0.106	0.106	0.106	0.106	0.106	0.106	0.106	0.106	0.106	0.106	0.107	0.107	0.107	0.107	0.107	0.107	0.107	0.108	0.108	0.108	0.109	0.109	0.11	0.11	0.11	0.111	0.111	0.112	0.112	0.113	0.113	0.114	0.115	0.115	0.116	0.118	0.126	0.124	0.119	0.12	0.122	0.123	0.124	0.125
	C11	0.103	0.104	0.103	0.103	0.103	0.103	0.103	0.103	0.104	0.104	0.104	0.103	0.104	0.104	0.105	0.105	0.105	0.105	0.106	0.106	0.106	0.107	0.107	0.107	0.108	0.108	0.109	0.109	0.11	0.111	0.111	0.112	0.112	0.113	0.114	0.114	0.115	0.116	0.117	0.119	0.129	0.128	0.124	0.122	0.123	0.125	0.126	0.128
	C12	0.106	0.106	0.105	0.105	0.105	0.105	0.105	0.105	0.105	0.104	0.105	0.104	0.105	0.105	0.105	0.105	0.105	0.105	0.105	0.105	0.105	0.106	0.106	0.106	0.106	0.106	0.107	0.107	0.107	0.108	0.108	0.109	0.109	0.109	0.11	0.11	0.111	0.112	0.112	0.114	0.123	0.114	0.115	0.116	0.117	0.118	0.119	0.12
	D1	0.103	0.103	0.103	0.103	0.103	0.103	0.104	0.103	0.103	0.103	0.104	0.104	0.104	0.104	0.104	0.105	0.105	0.105	0.105	0.105	0.106	0.106	0.106	0.106	0.107	0.107	0.107	0.108	0.108	0.109	0.109	0.109	0.11	0.11	0.111	0.111	0.112	0.113	0.114	0.114	0.115	0.116	0.116	0.117	0.118	0.119	0.12	0.121
	D2	0.106	0.106	0.106	0.106	0.106	0.106	0.106	0.106	0.106	0.106	0.107	0.107	0.107	0.107	0.108	0.108	0.109	0.108	0.109	0.109	0.109	0.11	0.11	0.111	0.111	0.111	0.112	0.112	0.113	0.114	0.114	0.115	0.115	0.116	0.117	0.118	0.118	0.119	0.12	0.121	0.122	0.123	0.125	0.125	0.127	0.128	0.13	0.131
	D3	0.104	0.104	0.104	0.105	0.105	0.104	0.104	0.105	0.105	0.105	0.105	0.105	0.106	0.106	0.106	0.106	0.107	0.107	0.107	0.107	0.108	0.108	0.108	0.109	0.109	0.11	0.11	0.111	0.111	0.112	0.112	0.113	0.113	0.114	0.115	0.115	0.116	0.117	0.117	0.118	0.119	0.12	0.121	0.122	0.123	0.125	0.126	0.127
	D4	0.105	0.105	0.106	0.108	0.108	0.108	0.108	0.108	0.107	0.106	0.106	0.106	0.106	0.106	0.107	0.107	0.107	0.107	0.108	0.108	0.108	0.109	0.109	0.11	0.11	0.11	0.111	0.111	0.112	0.112	0.113	0.113	0.114	0.115	0.115	0.116	0.117	0.117	0.118	0.119	0.12	0.121	0.122	0.123	0.124	0.126	0.126	0.128
	D5	0.105	0.105	0.105	0.105	0.105	0.105	0.105	0.106	0.106	0.106	0.106	0.106	0.106	0.107	0.107	0.108	0.108	0.108	0.109	0.109	0.109	0.11	0.11	0.111	0.111	0.112	0.112	0.113	0.114	0.114	0.115	0.115	0.116	0.117	0.118	0.118	0.119	0.12	0.121	0.122	0.123	0.125	0.126	0.127	0.128	0.13	0.131	0.133
	D6	0.104	0.104	0.104	0.104	0.104	0.104	0.105	0.105	0.105	0.105	0.105	0.105	0.105	0.106	0.106	0.106	0.107	0.107	0.107	0.107	0.108	0.108	0.108	0.109	0.109	0.109	0.11	0.11	0.111	0.111	0.112	0.112	0.113	0.113	0.114	0.114	0.115	0.116	0.117	0.117	0.119	0.119	0.12	0.121	0.122	0.123	0.124	0.125
	D7	0.104	0.104	0.104	0.104	0.104	0.104	0.104	0.104	0.104	0.105	0.105	0.105	0.106	0.106	0.107	0.111	0.107	0.107	0.108	0.108	0.109	0.109	0.109	0.11	0.11	0.111	0.111	0.112	0.112	0.113	0.113	0.114	0.115	0.115	0.116	0.117	0.118	0.119	0.12	0.121	0.122	0.123	0.124	0.125	0.126	0.127	0.128	0.13
	D8	0.104	0.104	0.104	0.104	0.104	0.104	0.104	0.104	0.104	0.104	0.104	0.104	0.105	0.104	0.105	0.105	0.105	0.105	0.106	0.106	0.106	0.106	0.107	0.107	0.107	0.108	0.108	0.108	0.109	0.109	0.11	0.11	0.111	0.111	0.112	0.112	0.113	0.114	0.114	0.115	0.12	0.117	0.117	0.118	0.119	0.12	0.121	0.122
	D9	0.103	0.104	0.103	0.104	0.104	0.104	0.104	0.104	0.104	0.104	0.104	0.105	0.105	0.105	0.105	0.106	0.106	0.106	0.107	0.107	0.107	0.108	0.108	0.108	0.109	0.109	0.11	0.11	0.111	0.111	0.112	0.112	0.113	0.114	0.114	0.115	0.116	0.117	0.117	0.118	0.123	0.12	0.121	0.122	0.123	0.125	0.126	0.127
	D10	0.105	0.104	0.104	0.104	0.104	0.104	0.105	0.105	0.105	0.105	0.106	0.106	0.106	0.107	0.107	0.107	0.108	0.108	0.109	0.109	0.109	0.11	0.11	0.111	0.111	0.112	0.112	0.113	0.114	0.114	0.115	0.115	0.116	0.117	0.118	0.118	0.119	0.12	0.121	0.123	0.13	0.126	0.126	0.127	0.128	0.129	0.131	0.133
	D11	0.105	0.105	0.105	0.105	0.105	0.105	0.105	0.105	0.105	0.105	0.106	0.106	0.106	0.106	0.107	0.107	0.108	0.108	0.108	0.109	0.109	0.11	0.11	0.11	0.111	0.111	0.112	0.112	0.113	0.113	0.114	0.115	0.115	0.116	0.117	0.117	0.118	0.119	0.12	0.121	0.129	0.126	0.124	0.125	0.126	0.127	0.128	0.13
	D12	0.104	0.104	0.104	0.104	0.104	0.105	0.105	0.104	0.105	0.105	0.105	0.105	0.105	0.106	0.106	0.106	0.106	0.107	0.107	0.107	0.107	0.108	0.108	0.109	0.109	0.109	0.11	0.11	0.111	0.111	0.112	0.112	0.113	0.113	0.114	0.115	0.115	0.116	0.117	0.118	0.12	0.119	0.12	0.121	0.122	0.124	0.125	0.126
	E1	0.104	0.104	0.104	0.104	0.104	0.104	0.103	0.103	0.103	0.103	0.104	0.104	0.104	0.104	0.104	0.105	0.105	0.105	0.105	0.105	0.106	0.106	0.107	0.107	0.107	0.108	0.108	0.109	0.109	0.11	0.111	0.111	0.112	0.113	0.113	0.114	0.115	0.116	0.117	0.118	0.119	0.12	0.121	0.122	0.124	0.125	0.126	0.128
	E2	0.104	0.104	0.104	0.104	0.104	0.104	0.104	0.104	0.104	0.104	0.104	0.104	0.105	0.105	0.105	0.106	0.106	0.106	0.106	0.106	0.107	0.107	0.107	0.107	0.108	0.108	0.109	0.109	0.11	0.11	0.111	0.111	0.112	0.113	0.113	0.114	0.115	0.116	0.116	0.117	0.118	0.119	0.12	0.121	0.122	0.124	0.125	0.126
	E3	0.106	0.105	0.105	0.105	0.106	0.105	0.105	0.105	0.105	0.105	0.105	0.105	0.105	0.105	0.106	0.106	0.106	0.106	0.106	0.106	0.106	0.107	0.107	0.107	0.108	0.108	0.109	0.109	0.109	0.11	0.11	0.111	0.111	0.112	0.113	0.113	0.114	0.115	0.115	0.116	0.117	0.118	0.119	0.12	0.121	0.122	0.123	0.124
	E4	0.105	0.105	0.105	0.105	0.105	0.105	0.105	0.105	0.105	0.105	0.105	0.105	0.105	0.106	0.106	0.106	0.106	0.107	0.107	0.107	0.107	0.107	0.108	0.108	0.108	0.109	0.109	0.11	0.111	0.111	0.111	0.112	0.112	0.113	0.114	0.114	0.115	0.116	0.117	0.118	0.118	0.12	0.121	0.122	0.123	0.124	0.125	0.127
	E5	0.104	0.105	0.105	0.105	0.105	0.105	0.105	0.105	0.105	0.105	0.105	0.105	0.105	0.105	0.105	0.105	0.105	0.105	0.106	0.106	0.106	0.106	0.106	0.106	0.107	0.107	0.108	0.108	0.108	0.109	0.109	0.11	0.11	0.11	0.111	0.112	0.112	0.113	0.114	0.115	0.115	0.116	0.117	0.118	0.119	0.12	0.121	0.123
	E6	0.106	0.105	0.105	0.105	0.105	0.104	0.104	0.104	0.104	0.105	0.105	0.104	0.105	0.105	0.105	0.105	0.105	0.105	0.105	0.105	0.105	0.105	0.105	0.106	0.106	0.106	0.107	0.107	0.107	0.107	0.108	0.108	0.109	0.109	0.11	0.11	0.111	0.112	0.112	0.113	0.113	0.114	0.115	0.116	0.117	0.118	0.119	0.12
	E7	0.105	0.105	0.105	0.105	0.105	0.105	0.106	0.106	0.106	0.106	0.106	0.106	0.107	0.107	0.107	0.108	0.109	0.109	0.109	0.11	0.11	0.11	0.111	0.112	0.112	0.113	0.113	0.114	0.115	0.115	0.116	0.117	0.118	0.118	0.119	0.12	0.121	0.123	0.124	0.125	0.126	0.128	0.129	0.131	0.133	0.134	0.136	0.138
	E8	0.106	0.107	0.107	0.107	0.107	0.107	0.107	0.107	0.107	0.107	0.107	0.107	0.108	0.108	0.109	0.109	0.11	0.11	0.11	0.111	0.111	0.111	0.112	0.112	0.113	0.113	0.114	0.115	0.115	0.116	0.117	0.117	0.118	0.119	0.12	0.121	0.122	0.123	0.124	0.125	0.126	0.128	0.129	0.13	0.132	0.134	0.135	0.137
	E9	0.106	0.106	0.107	0.107	0.107	0.107	0.107	0.107	0.108	0.108	0.108	0.109	0.11	0.11	0.111	0.112	0.112	0.113	0.113	0.114	0.114	0.115	0.115	0.116	0.117	0.118	0.119	0.119	0.12	0.121	0.122	0.123	0.124	0.125	0.127	0.128	0.129	0.131	0.132	0.135	0.138	0.137	0.139	0.141	0.143	0.145	0.147	0.15
	E10	0.105	0.106	0.106	0.106	0.106	0.106	0.106	0.107	0.106	0.107	0.107	0.107	0.108	0.108	0.109	0.11	0.11	0.111	0.111	0.112	0.112	0.113	0.113	0.114	0.114	0.115	0.116	0.117	0.117	0.118	0.119	0.12	0.121	0.122	0.124	0.125	0.126	0.127	0.128	0.131	0.136	0.133	0.135	0.137	0.139	0.141	0.142	0.145
	E11	0.106	0.106	0.106	0.106	0.106	0.106	0.106	0.106	0.106	0.107	0.107	0.107	0.108	0.108	0.109	0.109	0.109	0.11	0.11	0.11	0.111	0.111	0.112	0.112	0.112	0.113	0.114	0.114	0.115	0.116	0.116	0.117	0.118	0.119	0.12	0.12	0.121	0.123	0.124	0.126	0.131	0.128	0.129	0.131	0.132	0.134	0.135	0.137
	E12	0.104	0.104	0.104	0.105	0.104	0.105	0.105	0.105	0.105	0.106	0.106	0.107	0.107	0.108	0.109	0.109	0.11	0.11	0.111	0.112	0.112	0.113	0.114	0.114	0.115	0.116	0.117	0.118	0.118	0.12	0.121	0.122	0.123	0.124	0.126	0.127	0.128	0.13	0.131	0.134	0.135	0.137	0.139	0.141	0.143	0.145	0.147	0.15
	F1	0.105	0.105	0.105	0.105	0.105	0.105	0.105	0.105	0.105	0.104	0.105	0.104	0.105	0.105	0.105	0.105	0.105	0.105	0.106	0.106	0.106	0.106	0.106	0.107	0.107	0.107	0.108	0.108	0.108	0.109	0.109	0.11	0.11	0.111	0.111	0.112	0.112	0.113	0.113	0.114	0.115	0.116	0.117	0.117	0.118	0.119	0.12	0.121
	F2	0.107	0.107	0.106	0.106	0.106	0.106	0.105	0.105	0.106	0.105	0.106	0.106	0.106	0.106	0.106	0.106	0.107	0.106	0.107	0.107	0.107	0.107	0.108	0.108	0.108	0.108	0.109	0.109	0.11	0.11	0.11	0.111	0.111	0.112	0.113	0.113	0.113	0.114	0.115	0.116	0.116	0.117	0.118	0.119	0.119	0.121	0.121	0.123
	F3	0.106	0.106	0.106	0.106	0.106	0.106	0.106	0.107	0.107	0.107	0.108	0.108	0.109	0.109	0.11	0.111	0.111	0.112	0.112	0.113	0.113	0.114	0.115	0.115	0.116	0.117	0.118	0.118	0.12	0.121	0.122	0.123	0.124	0.125	0.126	0.127	0.128	0.13	0.131	0.133	0.134	0.136	0.138	0.14	0.142	0.144	0.146	0.148
	F4	0.105	0.105	0.105	0.105	0.105	0.105	0.105	0.105	0.105	0.105	0.105	0.105	0.105	0.106	0.106	0.106	0.106	0.106	0.107	0.107	0.107	0.107	0.108	0.108	0.108	0.109	0.109	0.11	0.11	0.111	0.111	0.111	0.112	0.113	0.113	0.114	0.114	0.115	0.116	0.116	0.117	0.118	0.119	0.12	0.121	0.122	0.123	0.124
	F5	0.106	0.106	0.105	0.105	0.105	0.104	0.104	0.104	0.104	0.104	0.105	0.105	0.105	0.105	0.105	0.105	0.105	0.106	0.106	0.106	0.106	0.106	0.106	0.107	0.107	0.107	0.107	0.108	0.108	0.108	0.109	0.109	0.11	0.11	0.111	0.111	0.112	0.112	0.113	0.114	0.114	0.115	0.116	0.117	0.117	0.119	0.119	0.12
	F6	0.106	0.106	0.106	0.106	0.105	0.105	0.105	0.105	0.105	0.105	0.105	0.105	0.105	0.105	0.106	0.106	0.106	0.106	0.106	0.106	0.106	0.107	0.107	0.107	0.107	0.108	0.108	0.108	0.109	0.109	0.11	0.11	0.11	0.111	0.111	0.112	0.113	0.113	0.114	0.115	0.115	0.116	0.117	0.117	0.118	0.119	0.12	0.121
	F7	0.104	0.104	0.104	0.104	0.104	0.104	0.104	0.105	0.105	0.106	0.106	0.106	0.107	0.107	0.108	0.109	0.109	0.11	0.11	0.111	0.111	0.112	0.112	0.113	0.113	0.114	0.114	0.115	0.116	0.116	0.117	0.118	0.118	0.119	0.12	0.121	0.122	0.123	0.124	0.126	0.127	0.128	0.129	0.131	0.132	0.134	0.135	0.137
	F8	0.104	0.105	0.105	0.105	0.105	0.105	0.106	0.106	0.106	0.107	0.107	0.107	0.108	0.108	0.109	0.11	0.11	0.11	0.111	0.112	0.112	0.112	0.113	0.114	0.114	0.115	0.116	0.116	0.117	0.118	0.118	0.119	0.12	0.121	0.122	0.123	0.124	0.125	0.126	0.128	0.129	0.13	0.131	0.133	0.134	0.136	0.138	0.139
	F9	0.106	0.107	0.107	0.107	0.107	0.107	0.107	0.107	0.107	0.107	0.108	0.108	0.109	0.109	0.11	0.11	0.111	0.111	0.112	0.112	0.112	0.113	0.113	0.114	0.114	0.115	0.116	0.116	0.117	0.117	0.118	0.119	0.12	0.12	0.121	0.122	0.123	0.124	0.125	0.127	0.127	0.129	0.13	0.131	0.133	0.134	0.135	0.137
	F10	0.105	0.106	0.106	0.106	0.106	0.106	0.106	0.107	0.107	0.107	0.107	0.108	0.109	0.109	0.11	0.11	0.111	0.111	0.112	0.112	0.112	0.113	0.114	0.114	0.115	0.115	0.116	0.117	0.117	0.118	0.119	0.12	0.12	0.121	0.122	0.123	0.124	0.125	0.126	0.128	0.129	0.13	0.131	0.132	0.133	0.135	0.136	0.138
	F11	0.105	0.105	0.105	0.106	0.106	0.106	0.106	0.106	0.106	0.106	0.107	0.107	0.108	0.108	0.109	0.109	0.11	0.11	0.111	0.111	0.111	0.112	0.113	0.113	0.113	0.114	0.115	0.115	0.116	0.117	0.117	0.118	0.119	0.12	0.12	0.121	0.122	0.123	0.124	0.126	0.127	0.128	0.13	0.131	0.132	0.134	0.135	0.137
	F12	0.103	0.103	0.104	0.104	0.104	0.104	0.104	0.105	0.105	0.105	0.106	0.106	0.106	0.107	0.108	0.108	0.109	0.109	0.11	0.11	0.11	0.111	0.112	0.112	0.112	0.113	0.114	0.115	0.115	0.116	0.117	0.117	0.118	0.119	0.12	0.121	0.122	0.123	0.124	0.126	0.126	0.128	0.129	0.131	0.132	0.133	0.135	0.137
	G1	0.103	0.103	0.103	0.103	0.103	0.103	0.103	0.103	0.103	0.103	0.103	0.103	0.103	0.103	0.104	0.104	0.104	0.104	0.104	0.104	0.104	0.105	0.105	0.105	0.105	0.106	0.106	0.106	0.107	0.107	0.107	0.107	0.108	0.108	0.109	0.109	0.11	0.11	0.111	0.111	0.112	0.112	0.113	0.113	0.114	0.115	0.115	0.116
	G2	0.107	0.107	0.106	0.107	0.107	0.107	0.107	0.107	0.107	0.108	0.108	0.108	0.108	0.108	0.109	0.109	0.11	0.11	0.11	0.11	0.111	0.111	0.112	0.112	0.112	0.112	0.113	0.113	0.114	0.114	0.115	0.115	0.116	0.116	0.117	0.117	0.118	0.119	0.12	0.12	0.121	0.122	0.123	0.123	0.124	0.126	0.126	0.127
	G3	0.105	0.104	0.104	0.105	0.104	0.104	0.104	0.104	0.104	0.104	0.104	0.104	0.104	0.105	0.105	0.105	0.105	0.105	0.106	0.106	0.105	0.106	0.106	0.106	0.106	0.107	0.107	0.107	0.108	0.108	0.108	0.109	0.109	0.109	0.11	0.11	0.111	0.111	0.112	0.112	0.113	0.113	0.114	0.115	0.115	0.116	0.117	0.117
	G4	0.106	0.106	0.108	0.106	0.107	0.106	0.106	0.107	0.107	0.107	0.107	0.107	0.107	0.107	0.108	0.108	0.108	0.108	0.109	0.109	0.109	0.109	0.109	0.109	0.11	0.11	0.11	0.11	0.111	0.111	0.112	0.112	0.112	0.113	0.113	0.114	0.114	0.115	0.115	0.116	0.116	0.117	0.117	0.118	0.119	0.119	0.12	0.121
	G5	0.105	0.105	0.105	0.105	0.105	0.105	0.105	0.105	0.105	0.105	0.105	0.105	0.105	0.106	0.105	0.106	0.106	0.106	0.106	0.106	0.106	0.106	0.106	0.107	0.107	0.107	0.107	0.107	0.108	0.108	0.108	0.109	0.109	0.109	0.11	0.11	0.111	0.111	0.113	0.112	0.113	0.113	0.114	0.114	0.115	0.115	0.116	0.117
	G6	0.105	0.105	0.106	0.105	0.105	0.105	0.105	0.105	0.105	0.105	0.106	0.106	0.106	0.106	0.106	0.106	0.107	0.108	0.107	0.107	0.107	0.107	0.108	0.108	0.108	0.109	0.109	0.109	0.109	0.11	0.11	0.111	0.111	0.111	0.112	0.112	0.113	0.113	0.114	0.114	0.115	0.116	0.116	0.117	0.117	0.118	0.119	0.12
	G7	0.103	0.103	0.103	0.103	0.103	0.104	0.104	0.104	0.104	0.104	0.105	0.105	0.105	0.106	0.106	0.106	0.107	0.107	0.107	0.108	0.108	0.109	0.109	0.11	0.11	0.111	0.111	0.112	0.112	0.113	0.113	0.114	0.115	0.115	0.116	0.117	0.118	0.118	0.119	0.12	0.121	0.122	0.123	0.124	0.125	0.126	0.127	0.129
	G8	0.105	0.105	0.105	0.105	0.105	0.105	0.106	0.106	0.106	0.106	0.107	0.107	0.107	0.108	0.108	0.108	0.109	0.109	0.11	0.11	0.11	0.111	0.111	0.112	0.112	0.112	0.113	0.113	0.114	0.115	0.115	0.116	0.116	0.117	0.118	0.118	0.119	0.12	0.121	0.122	0.123	0.124	0.124	0.126	0.127	0.128	0.129	0.13
	G9	0.106	0.106	0.106	0.106	0.106	0.106	0.106	0.107	0.107	0.107	0.108	0.108	0.108	0.109	0.109	0.11	0.11	0.11	0.111	0.111	0.112	0.112	0.113	0.113	0.114	0.114	0.115	0.115	0.116	0.116	0.117	0.118	0.118	0.119	0.12	0.121	0.122	0.123	0.124	0.125	0.126	0.127	0.128	0.129	0.13	0.131	0.132	0.134
	G10	0.104	0.104	0.104	0.104	0.104	0.105	0.105	0.105	0.105	0.105	0.106	0.106	0.106	0.106	0.107	0.107	0.108	0.108	0.108	0.109	0.109	0.11	0.11	0.111	0.111	0.111	0.112	0.112	0.113	0.113	0.114	0.115	0.115	0.116	0.117	0.117	0.118	0.119	0.12	0.121	0.122	0.122	0.124	0.124	0.126	0.127	0.128	0.129
	G11	0.104	0.104	0.105	0.105	0.105	0.105	0.106	0.106	0.106	0.106	0.107	0.107	0.107	0.107	0.108	0.108	0.108	0.109	0.109	0.11	0.11	0.111	0.111	0.111	0.112	0.112	0.113	0.113	0.114	0.114	0.115	0.116	0.116	0.117	0.117	0.118	0.119	0.12	0.12	0.122	0.122	0.123	0.124	0.125	0.126	0.127	0.128	0.129
	G12	0.105	0.104	0.105	0.105	0.105	0.105	0.105	0.106	0.106	0.106	0.107	0.107	0.107	0.108	0.108	0.108	0.109	0.109	0.11	0.11	0.11	0.111	0.111	0.111	0.112	0.112	0.113	0.113	0.114	0.114	0.115	0.115	0.116	0.117	0.117	0.118	0.119	0.12	0.12	0.122	0.122	0.123	0.124	0.125	0.126	0.127	0.13	0.13
	H1	0.09	0.09	0.09	0.09	0.09	0.09	0.09	0.09	0.09	0.09	0.09	0.09	0.09	0.09	0.09	0.09	0.09	0.09	0.09	0.09	0.09	0.09	0.09	0.09	0.09	0.09	0.09	0.09	0.09	0.09	0.09	0.09	0.09	0.09	0.09	0.09	0.09	0.09	0.09	0.09	0.09	0.09	0.09	0.09	0.09	0.09	0.09	0.09
	H2	0.091	0.091	0.091	0.091	0.091	0.091	0.091	0.091	0.091	0.091	0.091	0.091	0.091	0.091	0.091	0.091	0.091	0.091	0.091	0.091	0.091	0.091	0.091	0.091	0.091	0.091	0.091	0.091	0.091	0.091	0.091	0.091	0.091	0.091	0.091	0.091	0.091	0.091	0.091	0.091	0.091	0.091	0.091	0.091	0.091	0.091	0.091	0.091
	H3	0.092	0.092	0.092	0.092	0.092	0.092	0.092	0.092	0.092	0.092	0.092	0.092	0.092	0.092	0.092	0.092	0.092	0.092	0.092	0.092	0.092	0.092	0.092	0.092	0.092	0.092	0.092	0.092	0.092	0.092	0.092	0.092	0.092	0.092	0.092	0.092	0.092	0.092	0.092	0.092	0.092	0.092	0.092	0.092	0.092	0.092	0.092	0.092
	H4	0.092	0.092	0.092	0.092	0.091	0.092	0.092	0.092	0.092	0.092	0.092	0.091	0.091	0.091	0.092	0.091	0.092	0.091	0.091	0.091	0.091	0.091	0.091	0.091	0.091	0.091	0.091	0.091	0.091	0.091	0.091	0.091	0.091	0.091	0.091	0.091	0.091	0.091	0.091	0.091	0.091	0.092	0.091	0.091	0.091	0.091	0.091	0.091
	H5	0.089	0.089	0.089	0.089	0.089	0.089	0.089	0.089	0.089	0.089	0.089	0.089	0.089	0.089	0.089	0.089	0.089	0.089	0.089	0.089	0.089	0.089	0.089	0.089	0.089	0.089	0.089	0.089	0.089	0.089	0.089	0.089	0.089	0.089	0.089	0.089	0.089	0.089	0.089	0.089	0.089	0.089	0.089	0.089	0.089	0.089	0.089	0.089
	H6	0.089	0.089	0.089	0.089	0.089	0.089	0.089	0.089	0.089	0.089	0.089	0.089	0.089	0.089	0.089	0.089	0.089	0.089	0.089	0.089	0.089	0.089	0.089	0.089	0.089	0.089	0.089	0.089	0.089	0.089	0.089	0.089	0.089	0.089	0.089	0.089	0.089	0.089	0.089	0.089	0.089	0.089	0.089	0.089	0.089	0.089	0.089	0.089
	H7	0.088	0.088	0.088	0.088	0.088	0.088	0.088	0.088	0.088	0.088	0.088	0.088	0.088	0.088	0.088	0.088	0.088	0.088	0.088	0.088	0.088	0.088	0.088	0.088	0.088	0.088	0.088	0.088	0.088	0.088	0.088	0.088	0.088	0.088	0.088	0.088	0.088	0.088	0.088	0.088	0.088	0.088	0.088	0.088	0.088	0.088	0.088	0.088
	H8	0.089	0.089	0.089	0.089	0.089	0.089	0.089	0.089	0.089	0.089	0.089	0.089	0.089	0.089	0.089	0.089	0.089	0.089	0.089	0.089	0.089	0.089	0.089	0.089	0.089	0.089	0.089	0.089	0.089	0.089	0.089	0.089	0.089	0.089	0.089	0.089	0.089	0.089	0.089	0.089	0.089	0.089	0.089	0.089	0.089	0.089	0.089	0.089
	H9	0.089	0.089	0.089	0.089	0.089	0.089	0.089	0.089	0.089	0.089	0.089	0.089	0.089	0.089	0.089	0.089	0.089	0.089	0.089	0.089	0.089	0.089	0.089	0.089	0.089	0.089	0.089	0.089	0.089	0.089	0.089	0.089	0.089	0.089	0.089	0.089	0.089	0.089	0.089	0.089	0.089	0.089	0.089	0.089	0.089	0.089	0.089	0.089
	H10	0.09	0.09	0.09	0.09	0.09	0.09	0.09	0.09	0.09	0.09	0.09	0.09	0.09	0.09	0.09	0.09	0.09	0.09	0.09	0.09	0.09	0.09	0.09	0.09	0.09	0.09	0.09	0.09	0.09	0.09	0.09	0.09	0.09	0.09	0.09	0.09	0.09	0.09	0.09	0.09	0.09	0.09	0.09	0.09	0.09	0.09	0.09	0.09
	H11	0.089	0.089	0.089	0.089	0.089	0.088	0.088	0.088	0.089	0.089	0.089	0.088	0.088	0.088	0.089	0.088	0.089	0.088	0.088	0.089	0.088	0.088	0.088	0.088	0.088	0.088	0.088	0.088	0.088	0.088	0.088	0.088	0.088	0.088	0.088	0.089	0.088	0.088	0.088	0.088	0.088	0.089	0.088	0.088	0.088	0.089	0.088	0.088
	H12	0.09	0.09	0.09	0.09	0.09	0.09	0.09	0.09	0.09	0.09	0.09	0.09	0.09	0.09	0.09	0.09	0.09	0.09	0.09	0.09	0.09	0.09	0.09	0.09	0.09	0.09	0.09	0.09	0.09	0.09	0.09	0.09	0.09	0.09	0.09	0.09	0.09	0.09	0.09	0.09	0.09	0.09	0.09	0.09	0.09	0.09	0.09	0.09
Results
		1	2	3	4	5	6	7	8	9	10	11	12
	A	-0.06	-0.04	-0.04	0.04	-0.04	-0.04	-0.04	0.04	0.06	-0.04	-0.06	-0.04	Max V [Read 2:600]
		1	1	1	1	1	1	1	1	1	1	1	1	R-Squared [Read 2:600]
		16:36:46	13:41:46	04:51:46	01:51:46	02:01:46	14:46:46	01:26:46	03:46:46	13:06:46	00:56:46	15:31:46	17:16:46	t at Max V [Read 2:600]
		16:34:16	13:44:16	04:44:16	01:56:46	01:54:16	14:41:46	01:21:46	03:54:16	13:05:56	00:56:46	15:27:36	17:16:46	Lagtime [Read 2:600]
	B	3.84	3.7	3.68	3.76	4	3.94	4.24	4.76	5.12	5.26	5.52	6.42	Max V [Read 2:600]
		1	1	1	1	1	1	1	1	1	1	1	1	R-Squared [Read 2:600]
		09:16:46	11:06:46	09:31:46	09:46:46	10:11:46	09:36:46	10:06:46	09:36:46	08:06:46	08:06:46	09:36:46	09:36:46	t at Max V [Read 2:600]
		07:03:23	07:18:42	07:05:34	07:06:30	07:34:51	07:12:48	06:36:43	06:48:51	06:26:33	06:34:17	07:02:52	07:23:27	Lagtime [Read 2:600]
	C	4.06	3.96	3.86	3.86	4.2	4.68	4.7	5.02	4.48	4.78	4.74	5.26	Max V [Read 2:600]
		1	1	1	1	1	1	1	1	1	1	1	1	R-Squared [Read 2:600]
		10:01:46	08:51:46	09:06:46	09:11:46	09:36:46	09:36:46	10:06:46	09:36:46	09:36:46	09:36:46	09:36:46	09:36:46	t at Max V [Read 2:600]
		06:58:24	06:34:08	06:29:02	06:29:38	06:50:29	07:14:43	07:34:06	07:53:14	08:03:22	07:37:23	07:20:46	08:02:06	Lagtime [Read 2:600]
	D	3.74	3.66	3.74	3.88	3.86	4.24	4.5	4.5	4.42	4.86	4.98	4.52	Max V [Read 2:600]
		1	1	1	1	1	1	1	1	1	1	1	1	R-Squared [Read 2:600]
		10:36:46	10:26:46	09:56:46	11:21:46	09:36:46	10:56:46	09:36:46	09:36:46	10:06:46	10:06:46	09:36:46	09:36:46	t at Max V [Read 2:600]
		07:40:46	07:05:18	07:18:58	07:32:39	07:04:07	07:54:16	07:28:37	07:51:29	07:39:55	07:39:58	07:43:28	07:40:56	Lagtime [Read 2:600]
	E	3.94	3.84	4	3.78	4.4	3.96	4.2	4.76	4.28	4.44	4.76	4.2	Max V [Read 2:600]
		1	1	1	1	1	1	1	1	1	1	1	1	R-Squared [Read 2:600]
		10:31:46	09:46:46	10:36:46	10:31:46	10:56:46	10:46:46	09:36:46	09:36:46	09:36:46	08:06:46	09:36:46	08:21:46	t at Max V [Read 2:600]
		07:03:53	07:02:58	07:20:57	07:02:23	07:46:13	07:39:13	06:43:45	07:10:19	06:25:05	06:22:40	07:08:10	06:07:19	Lagtime [Read 2:600]
	F	3.76	3.58	3.98	3.7	3.76	4.12	3.7	4.02	3.84	4.24	4.26	3.7	Max V [Read 2:600]
		1	1	1	1	1	1	1	1	1	1	1	1	R-Squared [Read 2:600]
		10:56:46	10:26:46	08:31:46	11:21:46	11:21:46	11:21:46	09:01:46	09:36:46	09:36:46	09:36:46	09:36:46	10:01:46	t at Max V [Read 2:600]
		07:38:38	07:28:14	06:14:49	07:26:22	07:47:18	08:02:34	06:40:03	06:49:46	06:52:56	07:04:09	07:05:57	06:42:34	Lagtime [Read 2:600]
	G	3.56	3.72	3.7	3.48	3.8	3.54	3.98	3.8	3.8	3.86	4.24	3.8	Max V [Read 2:600]
		1	1	1	1	1	1	1	1	1	1	1	1	R-Squared [Read 2:600]
		11:11:46	10:51:46	12:11:46	12:01:46	11:51:46	12:01:46	10:31:46	10:01:46	10:36:46	11:16:46	10:41:46	11:16:46	t at Max V [Read 2:600]
		08:30:40	07:52:30	08:41:42	08:25:08	08:52:55	08:28:29	07:46:51	07:35:59	07:29:40	07:47:51	08:01:23	07:48:33	Lagtime [Read 2:600]
	H	0.06	-0.04	-0.06	-0.04	-0.06	-0.06	-0.06	-0.04	0.06	-0.06	-0.04	-0.04	Max V [Read 2:600]
		1	1	1	1	1	1	1	1	1	1	1	1	R-Squared [Read 2:600]
		08:31:46	05:06:46	01:41:46	02:56:46	16:36:46	15:46:46	00:56:46	13:16:46	06:41:46	16:36:46	00:56:46	00:56:46	t at Max V [Read 2:600]
		08:34:16	05:04:16	01:39:16	02:49:16	16:35:56	15:47:36	00:54:16	13:16:46	06:42:36	16:35:56	00:54:16	00:54:16	Lagtime [Read 2:600]
[truncated: 385 more columns]

## Sheet: Rep 3 Doubling time
Inf	Inf	2.13993e+06	Inf	Inf	112583	92243.1	Inf	Inf	2.00471e+06	1.17243e+06	1.66849e+06
137.006	141.493	138.226	137.634	138.667	137.687	129.771	130.508	129.263	129.533	128.137	127.785	WT	138.452	129.166
131.375	132.303	132.291	132.825	132.078	131.992	135.029	136.884	139.824	135.306	131.234	138.138	V410I	132.144	136.069
140.892	140.096	140.526	140.577	139.734	140.653	137.481	139.894	138.651	136.889	139.251	139.162	V410A	140.413	138.555
133.305	134.919	135.114	134.18	135.262	137.623	131.602	134.208	130.237	131.125	132.929	128.693	R403H	135.067	131.466
140.302	141.872	133.264	139.334	141.765	141.166	137.378	136.868	138.297	137.901	138.09	137.339	R403C	139.617	137.646
151.924	149.432	152.142	153.809	153.276	153.704	146.052	146.127	146.61	146.215	147.174	147.881	V410D	152.381	146.676
Inf	Inf	Inf	376547	1.59428e+06	Inf	Inf	Inf	Inf	Inf	157650	Inf
Normalized to WT for that set
0.989553	1.02196	0.998363	0.994092	1.00155	0.994476	1.00468	1.01039	1.00075	1.00284	0.992029	0.989309	WT	1	1
0.948885	0.955587	0.9555	0.959356	0.953961	0.953341	1.04539	1.05975	1.08252	1.04754	1.01601	1.06946	V410I	0.954438	1.05344
1.01762	1.01188	1.01498	1.01535	1.00926	1.01589	1.06437	1.08305	1.07343	1.05979	1.07808	1.07739	V410A	1.01416	1.07269
												R403H	0.975551	1.0178
												R403C	1.00842	1.06565
1.0973	1.0793	1.09888	1.11091	1.10707	1.11016	1.13073	1.13131	1.13505	1.13199	1.13941	1.14489	V410D	1.10061	1.13556
