# Supplementary material for: TUBA1A tubulinopathy mutants disrupt neuron morphogenesis and override XMAP215/Stu2 regulation of microtubule dynamics
Source: eLife. 2022 May 5;11:e76189. doi: 10.7554/eLife.76189 (PMC9236607; doi:10.7554/eLife.76189)
Supplement: Figure 4—source data 1. [file elife-76189-fig4-data1.xlsx]

## Sheet: WT
yJM4015																					yJM4015																		yJM4015
Imaged on 08.05.19																					Imaged on 08.23.19																		Imaged on 08.23.19
			*example life plot												**example life plot 2 -- in prism!
Image #004 cell#1			Image #004 cell#2			Image #005 cell#1			Image #006 cell#1			Image #006 cell#2			Image #007 cell#1			Image #007 cell#2			Image #001 cell#1			Image #002 cell#1			Image #002 cell#2			Image #005 cell#1			Image #007 cell#1			Image #008 cell#1			Image #001 cell#1			Image #001 cell#2			Image #003 cell#1			Image #004 cell#1
Time (s)	Length	Length (um)	Time (s)	Length	Length (um)	Time (s)	Length	Length (um)	Time (s)	Length	Length (um)	Time (s)	Length	Length (um)	Time (s)	Length	Length (um)	Time (s)	Length	Length (um)	Time (s)	Length	Length (um)	Time (s)	Length	Length (um)	Time (s)	Length	Length (um)	Time (s)	Length	Length (um)	Time (s)	Length	Length (um)	Time (s)	Length	Length (um)	Time (s)	Length	Length (um)	Time (s)	Length	Length (um)	Time (s)	Length	Length (um)	Time (s)	Length
0	15.572	0.830455	0	15.033	0.80171	0	1.414	0.0754086	0	15.008	0.800377	0	13.314	0.710036	0	15.008	0.800377	0	16.348	0.871839	0	24.06	1.28312	0	8.654	0.461518	0	9.006	0.48029	0	0	0	0	20.18	1.0762	0	14.24	0.759419	0	14.614	0.779365	0	5.217	0.278223	0	19.565	1.0434	0	28.482
4	21.57	1.15033	4	16.508	0.880372	4	0	0	4	12.5	0.666625	4	15.652	0.834721	4	12.5	0.666625	4	14.866	0.792804	4	23.781	1.26824	4	9.843	0.524927	4	10.672	0.569138	4	0	0	4	19.889	1.06068	4	14.522	0.774458	4	16.087	0.85792	4	4.714	0.251398	4	15.808	0.843041	4	30.612
8	18.035	0.961807	8	16.621	0.886398	8	3.041	0.162177	8	12.981	0.692277	8	17.393	0.927569	8	12.981	0.692277	8	18.062	0.963246	8	29.122	1.55308	8	10.899	0.581244	8	10.467	0.558205	8	0	0	8	22.728	1.21208	8	13.924	0.742567	8	9.434	0.503115	8	5.897	0.314487	8	19.082	1.01764	8	29.413
12	22.672	1.2091	12	26.8	1.42924	12	6.519	0.347658	12	14.916	0.79547	12	18.2	0.970606	12	14.916	0.79547	12	19.526	1.04132	12	30	1.5999	12	10.853	0.57879	12	3.801	0.202707	12	0	0	12	23.704	1.26413	12	14.795	0.789017	12	10.198	0.543859	12	5.935	0.316514	12	18.236	0.972526	12	32.436
16	19.912	1.06191	16	26.575	1.41724	16	4.301	0.229372	16	18.682	0.996311	16	20.815	1.11006	16	18.682	0.996311	16	23.901	1.27464	16	28.324	1.51052	16	10.919	0.58231	16	5.897	0.314487	16	0	0	16	25.669	1.36893	16	12.828	0.684117	16	4.069	0.217	16	4.773	0.254544	16	18.768	1.0009	16	32.366
20	23.817	1.27016	20	25.831	1.37757	20	5.59	0.298115	20	14.5	0.773285	20	23.479	1.25214	20	14.5	0.773285	20	29.703	1.58406	20	20.572	1.0971	20	12.257	0.653666	20	6.872	0.366484	20	0	0	20	29.426	1.56929	20	11.479	0.612175	20	6.667	0.355551	20	7.491	0.399495	20	15.293	0.815576	20	34.026
24	24.965	1.33138	24	26.405	1.40818	24	5.59	0.298115	24	22.5	1.19993	24	23.927	1.27603	24	22.5	1.19993	24	28.364	1.51265	24	20.069	1.07028	24	14.174	0.755899	24	7.867	0.419547	24	0	0	24	24.66	1.31512	24	13.924	0.742567	24	6.749	0.359924	24	15.442	0.823522	24	15.366	0.819469	24	38.019
28	25.715	1.37138	28	30.418	1.62219	28	7.159	0.381789	28	19.558	1.04303	28	26.277	1.40135	28	19.558	1.04303	28	22.299	1.18921	28	22.133	1.18035	28	14.866	0.792804	28	6.936	0.369897	28	0	0	28	17.14	0.914076	28	14.318	0.763579	28	12.293	0.655586	28	16.786	0.895197	28	12.728	0.678784	28	36.252
32	29.602	1.57867	32	29.296	1.56236	32	9.552	0.509408	32	24.52	1.30765	32	26.387	1.40722	32	24.52	1.30765	32	21.101	1.12532	32	15.723	0.838508	32	15.506	0.826935	32	8.333	0.444399	32	0	0	32	15.333	0.817709	32	9.434	0.503115	32	14.337	0.764592	32	16.255	0.866879	32	6.566	0.350165	32	37.353
36	30.859	1.64571	36	30.373	1.61979	36	10.259	0.547112	36	22.322	1.19043	36	27.536	1.46849	36	22.322	1.19043	36	21.708	1.15769	36	11.552	0.616068	36	17.537	0.935248	36	12.042	0.6422	36	3.887	0.207294	36	14.318	0.763579	36	2.867	0.152897	36	15.074	0.803896	36	13.92	0.742354	36	5.217	0.278223	36	38.195
40	32.319	1.72357	40	30.871	1.64635	40	11.314	0.603376	40	23.633	1.26035	40	23.707	1.26429	40	23.633	1.26035	40	18.822	1.00378	40	11.557	0.616335	40	13.876	0.740007	40	12.297	0.655799	40	6.146	0.327766	40	13.072	0.69713	40	2.108	0.11242	40	16.898	0.90117	40	11.338	0.604656	40	5.099	0.27193	40	39.011
44	27.902	1.48801	44	31.085	1.65776	44	16.378	0.873439	44	21.225	1.13193	44	19.602	1.04537	44	21.225	1.13193	44	15.008	0.800377	44	10.76	0.573831	44	6.403	0.341472	44	12.776	0.681344	44	7.846	0.418427	44	8.062	0.429946	44	6	0.31998	44	16.72	0.891678	44	10.842	0.578204	44	4.472	0.238492	44	35.503
48	27.459	1.46439	48	31.988	1.70592	48	19.831	1.05759	48	20.304	1.08281	48	19.209	1.02442	48	20.304	1.08281	48	7.906	0.421627	48	13.333	0.711049	48	5.426	0.289369	48	11.609	0.619108	48	8.8	0.469304	48	5.676	0.302701	48	1.667	0.0889011	48	15.355	0.818882	48	18.909	1.00842	48	8.333	0.444399	48	36.359
52	25.5	1.35991	52	32.653	1.74138	52	23.049	1.2292	52	12.083	0.644386	52	15.62	0.833015	52	12.083	0.644386	52	11.236	0.599216	52	13.068	0.696916	52	5.831	0.310967	52	15.366	0.819469	52	12.983	0.692383	52	9.22	0.491703	52	7.032	0.375017	52	17.159	0.915089	52	22.41	1.19513	52	16.898	0.90117	52	30.509
56	20.112	1.07257	56	25.298	1.34914	56	24.546	1.30904	56	6.083	0.324406	56	13.124	0.699903	56	6.083	0.324406	56	7.616	0.406161	56	4.534	0.241798	56	6.2	0.330646	56	18.077	0.964046	56	13.744	0.732968	56	9.339	0.498049	56	5.821	0.310434	56	16.035	0.855147	56	22.825	1.21726	56	22.164	1.18201	56	26.257
60	16.155	0.861546	60	18.5	0.986605	60	23.943	1.27688	60	1.5	0.079995	60	9.192	0.490209	60	1.5	0.079995	60	7.106	0.378963	60	8.138	0.434	60	8.498	0.453198	60	12.338	0.657986	60	14.765	0.787417	60	12.875	0.686624	60	4.269	0.227666	60	15.585	0.831148	60	24.698	1.31714	60	22.804	1.21614	60	25
64	15.524	0.827895	64	14.213	0.757979	64	26.401	1.40797	64	0	0	64	6.265	0.334112	64	0	0	64	8.139	0.434053	64	9.911	0.528554	64	9.22	0.491703	64	12.693	0.676918	64	17.208	0.917703	64	15.67	0.835681	64	4.177	0.222759	64	12.824	0.683904	64	20.396	1.08772	64	21.615	1.15273	64	23.176
68	19.912	1.06191	68	8.732	0.465678	68	27.313	1.4566	68	4.301	0.229372	68	5.701	0.304034	68	4.301	0.229372	68	11.424	0.609242	68	9.667	0.515541	68	9.153	0.488129	68	12.445	0.663692	68	18.077	0.964046	68	18.135	0.96714	68	5.426	0.289369	68	4.534	0.241798	68	15.366	0.819469	68	29.094	1.55158	68	19.799
72	22.638	1.20728	72	3.354	0.178869	72	29.262	1.56054	72	11.543	0.615588	72	7.906	0.421627	72	11.543	0.615588	72	13.21	0.704489	72	8.537	0.455278	72	9.672	0.515808	72	13.004	0.693503	72	20.213	1.07796	72	17.601	0.938661	72	7.071	0.377096	72	9.804	0.522847	72	17.867	0.952847	72	24.15	1.28792	72	15.951
76	22.594	1.20494	76	7.5	0.399975	76	23.243	1.23955	76	13.928	0.74278	76	8.062	0.429946	76	13.928	0.74278	76	17.029	0.908157	76	11.402	0.608069	76	11.04	0.588763	76	12.293	0.655586	76	19.508	1.04036	76	14.881	0.793604	76	6.799	0.362591	76	9.718	0.518261	76	18.454	0.984152	76	31.287	1.66854	76	16.72
80	23.505	1.25352	80	7.106	0.378963	80	21.587	1.15123	80	15.042	0.80219	80	4.301	0.229372	80	15.042	0.80219	80	18.118	0.966233	80	5	0.26665	80	10.355	0.552232	80	14.881	0.793604	80	21.2	1.1306	80	18.941	1.01012	80	7.923	0.422534	80	11.686	0.623214	80	21.868	1.16622	80	35.201	1.87727	80	18.714
84	13.509	0.720435	84	9.434	0.503115	84	18.974	1.01188	84	15.89	0.847414	84	7.906	0.421627	84	15.89	0.847414	84	21.57	1.15033	84	6.403	0.341472	84	8.062	0.429946	84	13.421	0.715742	84	23.022	1.22776	84	16.58	0.884211	84	12	0.63996	84	7.454	0.397522	84	18.514	0.987352	84	26.704	1.42412	84	19.647
88	7.071	0.377096	88	11.402	0.608069	88	12.258	0.653719	88	17.889	0.95402	88	9.708	0.517728	88	17.889	0.95402	88	18.446	0.983725	88	6.6	0.351978	88	9.718	0.518261	88	14.43	0.769552	88	24.875	1.32658	88	16.2	0.863946	88	13.416	0.715475	88	9.41	0.501835	88	25.944	1.38359	88	24.205	1.29085	88	16.697
92	8.515	0.454105	92	13.865	0.73942	92	8.515	0.454105	92	13.928	0.74278	92	11.511	0.613882	92	13.928	0.74278	92	15	0.79995	92	9.428	0.502795	92	7.608	0.405735	92	15.606	0.832268	92	26.719	1.42492	92	15.074	0.803896	92	12.078	0.64412	92	6.872	0.366484	92	23.863	1.27261	92	25.996	1.38637	92	21
96	8.016	0.427493	96	17.219	0.918289	96	6.083	0.324406	96	17.088	0.911303	96	13.601	0.725341	96	17.088	0.911303	96	16.101	0.858666	96	10.541	0.562152	96	5.897	0.314487	96	10.75	0.573298	96	25.612	1.36589	96	11.643	0.620921	96	12.374	0.659905	96	6.872	0.366484	96	28.674	1.52918	96	24.002	1.28003	96	21.922
100	8.276	0.441359	100	21.552	1.14937	100	3.536	0.188575	100	16.492	0.879518	100	14.422	0.769125	100	16.492	0.879518	100	14.16	0.755153	100	12.293	0.655586	100	6.667	0.355551	100	10.77	0.574364	100	27.659	1.47505	100	8.333	0.444399	100	8.333	0.444399	100	8.876	0.473357	100	31.434	1.67638	100	24.413	1.30195	100	26.03
104	10.607	0.565671	104	23.88	1.27352	104	8.846	0.471757	104	15.788	0.841974	104	14.705	0.784218	104	15.788	0.841974	104	18.398	0.981165	104	13.683	0.729714	104	6.6	0.351978	104	9.171	0.489089	104	25.944	1.38359	104	9.333	0.497729	104	15.51	0.827148	104	8.969	0.478317	104	30.732	1.63894	104	27.101	1.4453	104	23.688
108	10.012	0.53394	108	23.033	1.22835	108	14.841	0.791471	108	16.808	0.896371	108	16.401	0.874665	108	16.808	0.896371	108	10.7	0.570631	108	14.682	0.782991	108	5.657	0.301688	108	5.385	0.287182	108	19.082	1.01764	108	5.754	0.306861	108	16.347	0.871786	108	10.734	0.572444	108	32.202	1.71733	108	25	1.33325	108	24.606
112	14.318	0.763579	112	24.352	1.29869	112	9.394	0.500982	112	15.811	0.843201	112	16.508	0.880372	112	15.811	0.843201	112	14.327	0.764059	112	15.114	0.80603	112	9.262	0.493942	112	8.353	0.445465	112	20.011	1.06719	112	7.401	0.394695	112	20	1.0666	112	12.494	0.666305	112	31.371	1.67302	112	25.805	1.37618	112	26.998
116	17.557	0.936315	116	23.585	1.25779	116	15.042	0.80219	116	15.977	0.852053	116	16.378	0.873439	116	15.977	0.852053	116	8.062	0.429946	116	16.007	0.853653	116	9.69	0.516768	116	8.498	0.453198	116	16.56	0.883145	116	6.263	0.334006	116	19.333	1.03103	116	11.402	0.608069	116	31.814	1.69664	116	25.942	1.38349	116	26.264
120	21.03	1.12153	120	12.619	0.672971	120	21.243	1.13289	120	19.164	1.02202	120	17.357	0.925649	120	19.164	1.02202	120	6.103	0.325473	120	18.812	1.00324	120	9.298	0.495862	120	8.007	0.427013	120	17.065	0.910076	120	7.601	0.405361	120	20.025	1.06793	120	8.969	0.478317	120	29.937	1.59654	120	20.344	1.08495	120	30.509
124	18.868	1.00623	124	12.207	0.650999	124	18.344	0.978286	124	20.742	1.10617	124	15.008	0.800377	124	20.742	1.10617	124	6.708	0.357738	124	21.045	1.12233	124	9.871	0.52642	124	11.338	0.604656	124	20.747	1.10644	124	8.233	0.439066	124	20.136	1.07385	124	12.293	0.655586	124	21.954	1.17081	124	20.18	1.0762	124	29.814
128	17.088	0.911303	128	9.849	0.525247	128	17.951	0.957327	128	20.156	1.07492	128	14.3	0.762619	128	20.156	1.07492	128	10.7	0.570631	128	19.686	1.04985	128	9.098	0.485196	128	12.88	0.68689	128	14.716	0.784804	128	11.005	0.586897	128	18.342	0.978179	128	11.662	0.621934	128	20	1.0666	128	21.615	1.15273	128	29.758
132	17.103	0.912103	132	8.078	0.4308	132	15.7	0.837281	132	25.495	1.35965	132	14.3	0.762619	132	25.495	1.35965	132	13.01	0.693823	132	19.325	1.0306	132	10.088	0.537993	132	10.672	0.569138	132	8.8	0.469304	132	10.858	0.579057	132	19.359	1.03242	132	15.151	0.808003	132	15.467	0.824855	132	16.997	0.90645	132	32.085
136	18.795	1.00234	136	9.962	0.531273	136	17.103	0.912103	136	24.824	1.32386	136	19.039	1.01535	136	24.824	1.32386	136	10	0.5333	136	20.268	1.08089	136	7.071	0.377096	136	8.667	0.462211	136	0	0	136	13.744	0.732968	136	21.302	1.13604	136	14.981	0.798937	136	7.491	0.399495	136	9.171	0.489089	136	34.294
140	20.156	1.07492	140	10.966	0.584817	140	18.2	0.970606	140	21.966	1.17145	140	15.008	0.800377	140	21.966	1.17145	140	14.916	0.79547	140	16.643	0.887571	140	7.032	0.375017	140	9.944	0.530314	140	2.333	0.124419	140	13.744	0.732968	140	25.002	1.33336	140	10.734	0.572444	140	4.216	0.224839	140	9.387	0.500609	140	32.804
144	22.472	1.19843	144	6.727	0.358751	144	16.53	0.881545	144	23.537	1.25523	144	13.038	0.695317	144	23.537	1.25523	144	17	0.90661	144	8.069	0.43032	144	6.037	0.321953	144	10.853	0.57879	144	6.128	0.326806	144	9.718	0.518261	144	25.08	1.33752	144	12.257	0.653666	144	4.028	0.214813	144	9.153	0.488129	144	31.568
148	41.8	2.22919	148	5.315	0.283449	148	9	0.47997	148	18.5	0.986605	148	10	0.5333	148	18.5	0.986605	148	8.016	0.427493	148	4.485	0.239185	148	9.672	0.515808	148	13.038	0.695317	148	6.708	0.357738	148	12.693	0.676918	148	26.833	1.431	148	15.951	0.850667	148	3.887	0.207294	148	5.548	0.295875	148	33.32
152	27.042	1.44215	152	4.243	0.226279	152	7.5	0.399975	152	14.08	0.750886	152	8.544	0.455652	152	14.08	0.750886	152	10.124	0.539913	152	12.115	0.646093	152	10.349	0.551912	152	9.153	0.488129	152	8.807	0.469677	152	14.036	0.74854	152	26.352	1.40535	152	11.571	0.617081	152	4.643	0.247611	152	7.401	0.394695	152	34.998
156	26.201	1.3973	156	3.606	0.192308	156	4.031	0.214973	156	8.86	0.472504	156	2.121	0.113113	156	8.86	0.472504	156	19.416	1.03546	156	17.867	0.952847	156	10.355	0.552232	156	4.534	0.241798	156	11.338	0.604656	156	9.667	0.515541	156	24.676	1.31597	156	12.238	0.652653	156	6.6	0.351978	156	10.588	0.564658	156	34.364
160	22.743	1.21288	160	4.717	0.251558	160	7.071	0.377096	160	2.236	0.119246	160	0	0	160	2.236	0.119246	160	14.866	0.792804	160	29.863	1.59259	160	7.667	0.408881	160	5.044	0.268997	160	14.193	0.756913	160	7.28	0.388242	160	25.142	1.34082	160	13.715	0.731421	160	9.195	0.490369	160	10.435	0.556499	160	35.418
164	28.32	1.51031	164	4.472	0.238492	164	2.693	0.143618	164	2.5	0.133325	164	2.693	0.143618	164	2.5	0.133325	164	9.552	0.509408	164	21.789	1.16201	164	7.923	0.422534	164	9.487	0.505942	164	14.318	0.763579	164	5.011	0.267237	164	25.104	1.3388	164	14.472	0.771792	164	9.894	0.527647	164	8.413	0.448665	164	32.28
168	25.656	1.36823	168	6.021	0.3211	168	7.517	0.400882	168	3.606	0.192308	168	2.5	0.133325	168	3.606	0.192308	168	9.014	0.480717	168	17.013	0.907303	168	6.263	0.334006	168	10.269	0.547646	168	17.324	0.923889	168	4.922	0.26249	168	24.716	1.3181	168	15.293	0.815576	168	11.513	0.613988	168	10.609	0.565778	168	34.469
172	22.743	1.21288	172	7.433	0.396402	172	9.657	0.515008	172	5.5	0.293315	172	1	0.05333	172	5.5	0.293315	172	10.124	0.539913	172	11.279	0.601509	172	7.18	0.382909	172	11.743	0.626254	172	17.566	0.936795	172	8	0.42664	172	21.731	1.15891	172	15.709	0.837761	172	10.198	0.543859	172	13.507	0.720328	172	39.21
176	19.294	1.02895	176	8.602	0.458745	176	12.349	0.658572	176	7.649	0.407921	176	3.905	0.208254	176	7.649	0.407921	176	10.794	0.575644	176	8.233	0.439066	176	6.009	0.32046	176	12.207	0.650999	176	16.816	0.896797	176	7.364	0.392722	176	19.669	1.04895	176	18.765	1.00074	176	9.481	0.505622	176	11.205	0.597563	176	38.649
180	13.463	0.717982	180	10.308	0.549726	180	10.44	0.556765	180	7.566	0.403495	180	6.801	0.362697	180	7.566	0.403495	180	10.977	0.585403	180	10.934	0.58311	180	8.233	0.439066	180	12.758	0.680384	180	10.138	0.54066	180	8.673	0.462531	180	17.333	0.924369	180	17.789	0.948687	180	9.357	0.499009	180	11.005	0.586897	180	42.001
184	13.657	0.728328	184	8.078	0.4308	184	8	0.42664	184	12.258	0.653719	184	6.265	0.334112	184	12.258	0.653719	184	13.463	0.717982	184	10	0.5333	184	9.434	0.503115	184	11.353	0.605455	184	6.936	0.369897	184	12.019	0.640973	184	17.029	0.908157	184	16.974	0.905223	184	10.022	0.534473	184	4.028	0.214813	184	43.324
188	9	0.47997	188	8.485	0.452505	188	4.301	0.229372	188	16.508	0.880372	188	11.236	0.599216	188	16.508	0.880372	188	17	0.90661	188	9.944	0.530314	188	13.072	0.69713	188	14.099	0.7519	188	3.333	0.177749	188	14.016	0.747473	188	14.422	0.769125	188	17.951	0.957327	188	12	0.63996	188	0	0	188	43.77
192	9.014	0.480717	192	10.05	0.535967	192	2	0.10666	192	14.705	0.784218	192	12.021	0.64108	192	14.705	0.784218	192	17.103	0.912103	192	14.004	0.746833	192	12.405	0.661559	192	14.099	0.7519	192	0	0	192	11.898	0.63452	192	10.176	0.542686	192	17.401	0.927995	192	12.671	0.675744	192	0	0	192	43.335
196	11	0.58663	196	12.903	0.688117	196	1.5	0.079995	196	13.537	0.721928	196	9.552	0.509408	196	13.537	0.721928	196	22.299	1.18921	196	11.78	0.628227	196	15.811	0.843201	196	13.004	0.693503	196	0	0	196	12.875	0.686624	196	13.601	0.725341	196	17.77	0.947674	196	9.098	0.485196	196	0	0	196	44.338
200	8.5	0.453305	200	14.009	0.7471	200	3.64	0.194121	200	16.14	0.860746	200	11.715	0.624761	200	16.14	0.860746	200	22.589	1.20467	200	12.526	0.668012	200	16.465	0.878078	200	13.283	0.708382	200	0	0	200	14.395	0.767685	200	7.732	0.412348	200	13.454	0.717502	200	4.384	0.233799	200	4.177	0.222759	200	44.817
204	6	0.31998	204	12.5	0.666625	204	3.536	0.188575	204	16	0.85328	204	10	0.5333	204	16	0.85328	204	21.101	1.12532	204	14.472	0.771792	204	17.333	0.924369	204	11.205	0.597563	204	0	0	204	16.169	0.862293	204	7.211	0.384563	204	9.804	0.522847	204	0	0	204	6.333	0.337739	204	43.365
208	5.59	0.298115	208	15.182	0.809656	208	4.61	0.245851	208	18.069	0.96362	208	7.159	0.381789	208	18.069	0.96362	208	25.807	1.37629	208	11.785	0.628494	208	12.12	0.64636	208	11.662	0.621934	208	4.069	0.217	208	17.78	0.948207	208	8.537	0.455278	208	4.922	0.26249	208	4.667	0.248891	208	7.52	0.401042	208	43.518
212	8.846	0.471757	212	15.7	0.837281	212	0	0	212	18.554	0.989485	212	9.014	0.480717	212	18.554	0.989485	212	25.986	1.38583	212	12.565	0.670091	212	10.635	0.567165	212	3.333	0.177749	212	2.357	0.125699	212	19.607	1.04564	212	5.27	0.281049	212	4.269	0.227666	212	6	0.31998	212	10.339	0.551379	212	41.11
216	10.308	0.549726	216	18.848	1.00516	216	0	0	216	23.087	1.23123	216	9.823	0.523861	216	23.087	1.23123	216	22.825	1.21726	216	13.437	0.716595	216	9.481	0.505622	216	3.333	0.177749	216	0	0	216	22.689	1.21	216	4.269	0.227666	216	2.848	0.151884	216	8.014	0.427387	216	13.671	0.729074	216	35.025
220	9.925	0.5293	220	15.882	0.846987	220	2.5	0.133325	220	19.812	1.05657	220	9.22	0.491703	220	19.812	1.05657	220	19.026	1.01466	220	9.944	0.530314	220	6.642	0.354218	220	3.162	0.168629	220	0	0	220	24.68	1.31618	220	2.357	0.125699	220	4.679	0.249531	220	10.339	0.551379	220	13.342	0.711529	220	30.674
224	0	0	224	18.125	0.966606	224	0	0	224	15.5	0.826615	224	9.618	0.512928	224	15.5	0.826615	224	19.812	1.05657	224	9.672	0.515808	224	6.037	0.321953	224	4.384	0.233799	224	3.073	0.163883	224	26.541	1.41543	224	11.333	0.604389	224	6.7	0.357311	224	9.718	0.518261	224	10.899	0.581244	224	24.984
228	0	0	228	18.581	0.990925	228	0	0	228	15.008	0.800377	228	6.576	0.350698	228	15.008	0.800377	228	9.22	0.491703	228	9.333	0.497729	228	8.34	0.444772	228	4.773	0.254544	228	5.207	0.277689	228	29.59	1.57803	228	10	0.5333	228	7.401	0.394695	228	11.411	0.608549	228	13.728	0.732114	228	25.615
232	4.123	0.21988	232	21.19	1.13006	232	2.693	0.143618	232	14.036	0.74854	232	6.801	0.362697	232	14.036	0.74854	232	5.59	0.298115	232	9.718	0.518261	232	9.707	0.517674	232	8	0.42664	232	6.009	0.32046	232	25.298	1.34914	232	11.508	0.613722	232	3.887	0.207294	232	17.867	0.952847	232	9.44	0.503435	232	24.75
236	3.536	0.188575	236	19.78	1.05487	236	5.025	0.267983	236	10.512	0.560605	236	8.078	0.4308	236	10.512	0.560605	236	3.808	0.203081	236	10.593	0.564925	236	8.498	0.453198	236	9.22	0.491703	236	5.935	0.316514	236	24.449	1.30387	236	13.153	0.701449	236	3.59	0.191455	236	12.684	0.676438	236	2.667	0.142231	236	24.005
240	0	0	240	21.708	1.15769	240	7.5	0.399975	240	8.276	0.441359	240	8.246	0.439759	240	8.276	0.441359	240	6.5	0.346645	240	12.115	0.646093	240	9.286	0.495222	240	9.672	0.515808	240	6.749	0.359924	240	18.382	0.980312	240	12.776	0.681344	240	6.368	0.339605	240	14.126	0.75334	240	4.243	0.226279	240	15.563
244	0	0	244	21.36	1.13913	244	11.511	0.613882	244	5.657	0.301688	244	8.062	0.429946	244	5.657	0.301688	244	7.81	0.416507	244	14.15	0.754619	244	7.803	0.416134	244	11.333	0.604389	244	1	0.05333	244	18.043	0.962233	244	6.412	0.341952	244	9.153	0.488129	244	15.202	0.810723	244	9.333	0.497729	244	10.541
248	0	0	248	20.893	1.11422	248	0	0	248	5.315	0.283449	248	11.543	0.615588	248	5.315	0.283449	248	6.021	0.3211	248	16.111	0.8592	248	6.009	0.32046	248	16.68	0.889544	248	1.667	0.0889011	248	18.856	1.00559	248	5.548	0.295875	248	9.006	0.48029	248	17.537	0.935248	248	4.679	0.249531	248	21.263
252	0	0	252	23.648	1.26115	252	10.012	0.53394	252	4.472	0.238492	252	9.657	0.515008	252	4.472	0.238492	252	7.81	0.416507	252	16.035	0.855147	252	5.667	0.302221	252	19.09	1.01807	252	0	0	252	16.347	0.871786	252	6.472	0.345152	252	12.548	0.669185	252	17.117	0.91285	252	5.821	0.310434	252	19.746
256	2	0.10666	256	22.456	1.19758	256	0	0	256	4.031	0.214973	256	9.5	0.506635	256	4.031	0.214973	256	11.673	0.622521	256	15.18	0.809549	256	10.667	0.568871	256	14.099	0.7519	256	0	0	256	15.67	0.835681	256	9.22	0.491703	256	11.743	0.626254	256	18.382	0.980312	256	3.606	0.192308	256	18.141
260	9.055	0.482903	260	22.946	1.22371	260	0	0	260	4.95	0.263984	260	10.92	0.582364	260	4.95	0.263984	260	9.552	0.509408	260	12.405	0.661559	260	8.138	0.434	260	15.133	0.807043	260	0	0	260	15.839	0.844694	260	11.968	0.638253	260	13.597	0.725128	260	22.689	1.21	260	4.028	0.214813	260	23.61
264	8.062	0.429946	264	25.48	1.35885	264	7.018	0.37427	264	1.803	0.096154	264	11.18	0.596229	264	1.803	0.096154	264	16.971	0.905063	264	12.983	0.692383	264	5.897	0.314487	264	14.193	0.756913	264	3.35	0.178656	264	13.507	0.720328	264	16.58	0.884211	264	13.908	0.741714	264	19.474	1.03855	264	2	0.10666	264	22.932
268	7.106	0.378963	268	26.571	1.41703	268	11.885	0.633827	268	1.581	0.0843147	268	9.22	0.491703	268	1.581	0.0843147	268	13.509	0.720435	268	9.758	0.520394	268	5.667	0.302221	268	12.401	0.661345	268	7.063	0.37667	268	11.494	0.612975	268	16.055	0.856213	268	15.085	0.804483	268	23.125	1.23326	268	0	0	268	11.686
272	8.5	0.453305	272	27.554	1.46945	272	8.602	0.458745	272	2.236	0.119246	272	9.552	0.509408	272	2.236	0.119246	272	15.977	0.852053	272	14.735	0.785818	272	5.011	0.267237	272	16.265	0.867412	272	8.807	0.469677	272	7.311	0.389896	272	12.338	0.657986	272	17.247	0.919783	272	26.283	1.40167	272	0	0	272	15.18
276	13.086	0.697876	276	29.652	1.58134	276	6.103	0.325473	276	6.727	0.358751	276	7.433	0.396402	276	6.727	0.358751	276	22.472	1.19843	276	15.67	0.835681	276	3.801	0.202707	276	15.297	0.815789	276	6.799	0.362591	276	6.2	0.330646	276	10.75	0.573298	276	16.028	0.854773	276	22.581	1.20424	276	2	0.10666	276	16.816
280	14.5	0.773285	280	27.295	1.45564	280	4.472	0.238492	280	6.265	0.334112	280	10.012	0.53394	280	6.265	0.334112	280	22.853	1.21875	280	16.128	0.860106	280	7.674	0.409254	280	17.385	0.927142	280	9.804	0.522847	280	7.032	0.375017	280	9.387	0.500609	280	13.908	0.741714	280	19.925	1.0626	280	2.603	0.138818	280	9.481
284	10.966	0.584817	284	25.894	1.38093	284	0	0	284	12.5	0.666625	284	11.597	0.618468	284	12.5	0.666625	284	20.815	1.11006	284	14.735	0.785818	284	10.77	0.574364	284	20.377	1.08671	284	11.643	0.620921	284	5.588	0.298008	284	8.692	0.463544	284	12.758	0.680384	284	22.784	1.21507	284	5.426	0.289369	284	19.29
288	13.946	0.74374	288	24.622	1.31309	288	0	0	288	15.977	0.852053	288	9.618	0.512928	288	15.977	0.852053	288	14.3	0.762619	288	9.428	0.502795	288	13.703	0.730781	288	18.765	1.00074	288	16.125	0.859946	288	5.706	0.304301	288	8	0.42664	288	14.522	0.774458	288	23.19	1.23672	288	6.083	0.324406	288	21.011
292	18.118	0.966233	292	20.887	1.1139	292	0	0	292	17.357	0.925649	292	12.093	0.64492	292	17.357	0.925649	292	11.402	0.608069	292	12	0.63996	292	15.118	0.806243	292	16.292	0.868852	292	16.974	0.905223	292	8.75	0.466638	292	7.923	0.422534	292	17.208	0.917703	292	16.869	0.899624	292	6.438	0.343339	292	20.763
296	14.603	0.778778	296	9.925	0.5293	296	4.61	0.245851	296	15.207	0.810989	296	12.816	0.683477	296	15.207	0.810989	296	11.8	0.629294	296	11.785	0.628494	296	17.667	0.942181	296	15.51	0.827148	296	18.37	0.979672	296	9.809	0.523114	296	7.782	0.415014	296	15.085	0.804483	296	17	0.90661	296	4.667	0.248891	296	23.212
300	12.093	0.64492	300	6.042	0.32222	300	7.649	0.407921	300	18.822	1.00378	300	9.22	0.491703	300	18.822	1.00378	300	9.925	0.5293	300	10.44	0.556765	300	18.215	0.971406	300	11.785	0.628494	300	24.909	1.3284	300	10.198	0.543859	300	4.853	0.25881	300	15.934	0.84976	300	13.153	0.701449	300	3	0.15999	300	24.23
304	12.042	0.6422	304	8.062	0.429946	304	10.012	0.53394	304	15.042	0.80219	304	0	0	304	15.042	0.80219	304	18.2	0.970606	304	9.357	0.499009	304	19.151	1.02132	304	13.992	0.746193	304	30.341	1.61809	304	13.072	0.69713	304	5	0.26665	304	17.499	0.933222	304	12.454	0.664172	304	7.52	0.401042	304	30.481
308	10.012	0.53394	308	6.103	0.325473	308	10.5	0.559965	308	20.555	1.0962	308	0	0	308	20.555	1.0962	308	23.286	1.24184	308	9.025	0.481303	308	19.894	1.06095	308	16.829	0.897491	308	33.89	1.80735	308	14.337	0.764592	308	0	0	308	19.351	1.03199	308	7.601	0.405361	308	10.028	0.534793	308	24.092
312	12.042	0.6422	312	5	0.26665	312	13.509	0.720435	312	27.065	1.44338	312	0	0	312	27.065	1.44338	312	20.573	1.09716	312	8.233	0.439066	312	19.969	1.06495	312	15.563	0.829975	312	37.724	2.01182	312	13.924	0.742567	312	0	0	312	16.028	0.854773	312	3.145	0.167723	312	10.672	0.569138	312	24.002
316	14.151	0.754673	316	4.717	0.251558	316	14.396	0.767739	316	23.308	1.24302	316	4.031	0.214973	316	23.308	1.24302	316	17.586	0.937861	316	11.338	0.604656	316	20.809	1.10974	316	15.951	0.850667	316	39.672	2.11571	316	13.068	0.696916	316	3.887	0.207294	316	14.757	0.786991	316	2.749	0.146604	316	10.333	0.551059	316	17.263
320	20.224	1.07855	320	9.179	0.489516	320	14.08	0.750886	320	18.974	1.01188	320	6.519	0.347658	320	18.974	1.01188	320	16.651	0.887998	320	12.526	0.668012	320	19.576	1.04399	320	16.169	0.862293	320	37.202	1.98398	320	13.864	0.739367	320	2.603	0.138818	320	12.042	0.6422	320	3.162	0.168629	320	13.683	0.729714	320	25.055
324	14.534	0.775098	324	9.823	0.523861	324	15.692	0.836854	324	15.338	0.817976	324	10.817	0.576871	324	15.338	0.817976	324	14.534	0.775098	324	9.843	0.524927	324	23.674	1.26253	324	16	0.85328	324	31.737	1.69253	324	14.579	0.777498	324	8.825	0.470637	324	8.654	0.461518	324	3	0.15999	324	11.785	0.628494	324	29.352
328	13.829	0.737501	328	9.487	0.505942	328	10.7	0.570631	328	22.743	1.21288	328	10.124	0.539913	328	22.743	1.21288	328	12.903	0.688117	328	10.382	0.553672	328	23.688	1.26328	328	14.701	0.784004	328	23.135	1.23379	328	13.667	0.728861	328	10.853	0.57879	328	5.588	0.298008	328	3.3	0.175989	328	14.795	0.789017	328	24.415
332	22.984	1.22574	332	10.05	0.535967	332	11.769	0.627641	332	28.218	1.50487	332	10.977	0.585403	332	28.218	1.50487	332	10.112	0.539273	332	9.809	0.523114	332	22.023	1.17449	332	16.125	0.859946	332	20.202	1.07737	332	16.111	0.8592	332	10.667	0.568871	332	7.134	0.380456	332	3.606	0.192308	332	18.741	0.999458	332	24.002
336	27.879	1.48679	336	12.258	0.653719	336	11.402	0.608069	336	28.636	1.52716	336	11.102	0.59207	336	28.636	1.52716	336	10.607	0.565671	336	8.36	0.445839	336	22.541	1.20211	336	16.58	0.884211	336	18.601	0.991991	336	16.388	0.873972	336	12.875	0.686624	336	6.872	0.366484	336	3.801	0.202707	336	21.336	1.13785	336	25.142
340	25.303	1.34941	340	14.577	0.777391	340	13.124	0.699903	340	34.213	1.82458	340	10.77	0.574364	340	34.213	1.82458	340	15.953	0.850773	340	13.768	0.734247	340	17.104	0.912156	340	16.553	0.882771	340	15.063	0.80331	340	22.204	1.18414	340	11.935	0.636494	340	10.29	0.548766	340	3.543	0.188948	340	20.336	1.08452	340	25.701
344	26.101	1.39197	344	13.509	0.720435	344	12.093	0.64492	344	35.331	1.8842	344	12.53	0.668225	344	35.331	1.8842	344	17.493	0.932902	344	16.74	0.892744	344	14.461	0.771205	344	18.49	0.986072	344	12.693	0.676918	344	23.485	1.25246	344	15.67	0.835681	344	10.919	0.58231	344	3.801	0.202707	344	20.939	1.11668	344	30.732
348	26.239	1.39933	348	12.166	0.648813	348	17.464	0.931355	348	30.373	1.61979	348	10.308	0.549726	348	30.373	1.61979	348	10.595	0.565031	348	16.898	0.90117	348	12.579	0.670838	348	13.437	0.716595	348	9	0.47997	348	24.989	1.33266	348	13.876	0.740007	348	12.338	0.657986	348	5.207	0.277689	348	16.455	0.877545	348	28.698
352	29.125	1.55324	352	11.511	0.613882	352	16.031	0.854933	352	25.348	1.35181	352	6.5	0.346645	352	25.348	1.35181	352	18.062	0.963246	352	20.766	1.10745	352	10.853	0.57879	352	7.696	0.410428	352	5.676	0.302701	352	24.518	1.30754	352	7.696	0.410428	352	12.078	0.64412	352	6.6	0.351978	352	19.026	1.01466	352	30.002
356	17.5	0.933275	356	13.537	0.721928	356	9.657	0.515008	356	25.283	1.34834	356	4.472	0.238492	356	25.283	1.34834	356	14.23	0.758886	356	11.205	0.597563	356	6.289	0.335392	356	12.225	0.651959	356	3.543	0.188948	356	25.563	1.36327	356	8.028	0.428133	356	9.911	0.528554	356	4.714	0.251398	356	17.413	0.928635	356	28.736
360	24.459	1.3044	360	15.572	0.830455	360	0	0	360	22.589	1.20467	360	0	0	360	22.589	1.20467	360	10.817	0.576871	360	10.858	0.579057	360	2.108	0.11242	360	9.268	0.494262	360	5.088	0.271343	360	20.979	1.11881	360	3.073	0.163883	360	10.593	0.564925	360	5.667	0.302221	360	16.667	0.888851	360	28.57
364	25.928	1.38274	364	16.508	0.880372	364	0	0	364	24.254	1.29347	364	0	0	364	24.254	1.29347	364	9.708	0.517728	364	13.22	0.705023	364	4.643	0.247611	364	12.293	0.655586	364	6.2	0.330646	364	17.391	0.927462	364	4.123	0.21988	364	12.12	0.64636	364	7.032	0.375017	364	17.159	0.915089	364	24.703
368	25.11	1.33912	368	18.561	0.989858	368	0	0	368	20.616	1.09945	368	4.61	0.245851	368	20.616	1.09945	368	11.927	0.636067	368	7.923	0.422534	368	6.708	0.357738	368	10.672	0.569138	368	6.566	0.350165	368	23.345	1.24499	368	6.009	0.32046	368	15.766	0.840801	368	8.724	0.465251	368	12.776	0.681344	368	23.447
372	20.718	1.10489	372	19.105	1.01887	372	0	0	372	14.983	0.799043	372	3.5	0.186655	372	14.983	0.799043	372	13.647	0.727795	372	7.667	0.408881	372	5.676	0.302701	372	18.215	0.971406	372	7.608	0.405735	372	21.169	1.12894	372	7.196	0.383763	372	14.162	0.755259	372	6.472	0.345152	372	9.286	0.495222	372	27.578
376	15.89	0.847414	376	23.135	1.23379	376	4.95	0.263984	376	16.688	0.889971	376	6.185	0.329846	376	16.688	0.889971	376	8.078	0.4308	376	6.342	0.338219	376	7.401	0.394695	376	12.454	0.664172	376	10.29	0.548766	376	21.263	1.13396	376	4.269	0.227666	376	14.016	0.747473	376	5.385	0.287182	376	10.006	0.53362	376	32.016
380	12.59	0.671425	380	17.007	0.906983	380	8.016	0.427493	380	19.78	1.05487	380	5.385	0.287182	380	19.78	1.05487	380	10.966	0.584817	380	12.293	0.655586	380	3.606	0.192308	380	17.629	0.940155	380	9.551	0.509355	380	22.755	1.21352	380	4.955	0.26425	380	14.806	0.789604	380	6.936	0.369897	380	9.104	0.485516	380	23.364
384	8.732	0.465678	384	16.621	0.886398	384	8.5	0.453305	384	16.101	0.858666	384	7.018	0.37427	384	16.101	0.858666	384	13.454	0.717502	384	12.667	0.675531	384	4.714	0.251398	384	20.003	1.06676	384	9.244	0.492983	384	28.057	1.49628	384	4.679	0.249531	384	18.595	0.991671	384	10.05	0.535967	384	9.195	0.490369	384	26.283
388	6.708	0.357738	388	8.078	0.4308	388	10.689	0.570044	388	9.823	0.523861	388	9.179	0.489516	388	9.823	0.523861	388	9.5	0.506635	388	11.813	0.629987	388	5.548	0.295875	388	18.974	1.01188	388	10	0.5333	388	27.787	1.48188	388	7.491	0.399495	388	17.641	0.940795	388	9.262	0.493942	388	9.667	0.515541	388	31.73
392	0	0	392	8.016	0.427493	392	7.382	0.393682	392	11.543	0.615588	392	10.794	0.575644	392	11.543	0.615588	392	10.112	0.539273	392	17.337	0.924582	392	7.063	0.37667	392	19.437	1.03658	392	10.593	0.564925	392	27.295	1.45564	392	8.692	0.463544	392	17.78	0.948207	392	4.485	0.239185	392	10.339	0.551379	392	34.54
396	0	0	396	5.852	0.312087	396	10.124	0.539913	396	8.139	0.434053	396	11.236	0.599216	396	8.139	0.434053	396	4.95	0.263984	396	16.829	0.897491	396	11.823	0.630521	396	13.683	0.729714	396	13.136	0.700543	396	27.406	1.46156	396	7.616	0.406161	396	22.482	1.19897	396	4.853	0.25881	396	9.843	0.524927	396	30.885
400	5.831	0.310967	400	2.062	0.109966	400	8.062	0.429946	400	12.042	0.6422	400	13.285	0.708489	400	12.042	0.6422	400	8.846	0.471757	400	11.508	0.613722	400	13.744	0.732968	400	12.019	0.640973	400	13.78	0.734887	400	21.19	1.13006	400	8.667	0.462211	400	23.447	1.25043	400	3.887	0.207294	400	7.902	0.421414	400	27.164
404	6.946	0.37043	404	6.021	0.3211	404	11	0.58663	404	9.5	0.506635	404	16.621	0.886398	404	9.5	0.506635	404	12.021	0.64108	404	8.498	0.453198	404	12.806	0.682944	404	10.339	0.551379	404	18.04	0.962073	404	20.028	1.06809	404	9.006	0.48029	404	26.306	1.4029	404	3.887	0.207294	404	8.673	0.462531	404	33.993
408	8.746	0.466424	408	4.031	0.214973	408	7.517	0.400882	408	6.083	0.324406	408	12.971	0.691743	408	6.083	0.324406	408	12.51	0.667158	408	11.402	0.608069	408	12.338	0.657986	408	8.172	0.435813	408	15.836	0.844534	408	14.146	0.754406	408	10	0.5333	408	26.868	1.43287	408	0	0	408	11.686	0.623214	408	36.922
412	12.54	0.668758	412	6.519	0.347658	412	6	0.31998	412	0	0	412	10.966	0.584817	412	0	0	412	9.657	0.515008	412	12.351	0.658679	412	7.032	0.375017	412	6.146	0.327766	412	17.804	0.949487	412	14.181	0.756273	412	3.543	0.188948	412	24.891	1.32744	412	4.955	0.26425	412	10.853	0.57879	412	39.65
416	11.281	0.601616	416	12.01	0.640493	416	3.354	0.178869	416	0	0	416	14.841	0.791471	416	0	0	416	13.21	0.704489	416	11.671	0.622414	416	4.667	0.248891	416	5.667	0.302221	416	15.51	0.827148	416	15.348	0.818509	416	10.462	0.557938	416	25.195	1.34365	416	3.3	0.175989	416	14.61	0.779151	416	36.372
420	11.236	0.599216	420	11.769	0.627641	420	1.581	0.0843147	420	3.202	0.170763	420	17.443	0.930235	420	3.202	0.170763	420	22.322	1.19043	420	12.53	0.668225	420	1.7	0.090661	420	6.325	0.337312	420	13.187	0.703263	420	10.76	0.573831	420	9.944	0.530314	420	26.098	1.39181	420	4.807	0.256357	420	16.865	0.89941	420	41.596
424	16.621	0.886398	424	13.647	0.727795	424	5	0.26665	424	2.062	0.109966	424	18.2	0.970606	424	2.062	0.109966	424	26.768	1.42754	424	9.718	0.518261	424	0	0	424	5.963	0.318007	424	9.41	0.501835	424	10.382	0.553672	424	12.693	0.676918	424	26.401	1.40797	424	5.696	0.303768	424	17.629	0.940155	424	49.222
428	16.919	0.90229	428	14.534	0.775098	428	10	0.5333	428	0	0	428	19.526	1.04132	428	0	0	428	26.58	1.41751	428	13.454	0.717502	428	2.404	0.128205	428	8.233	0.439066	428	2.828	0.150817	428	6.872	0.366484	428	11.87	0.633027	428	27.522	1.46775	428	9.944	0.530314	428	12.875	0.686624	428	42.555
432	19.138	1.02063	432	15.075	0.80395	432	6.964	0.37139	432	0	0	432	20.718	1.10489	432	0	0	432	26.618	1.41954	432	16.526	0.881332	432	2.828	0.150817	432	7.196	0.383763	432	0	0	432	9.006	0.48029	432	13.038	0.695317	432	23.949	1.2772	432	10.858	0.579057	432	13.683	0.729714	432	26.8
436	23.049	1.2292	436	15.403	0.821442	436	11.011	0.587217	436	0	0	436	20.573	1.09716	436	0	0	436	22.809	1.2164	436	17.385	0.927142	436	3.727	0.198761	436	4.216	0.224839	436	0	0	436	11.671	0.622414	436	14.941	0.796804	436	24.524	1.30786	436	14.926	0.796004	436	18.358	0.979032	436	24.608
440	20.353	1.08543	440	17	0.90661	440	11.402	0.608069	440	0	0	440	24.99	1.33272	440	0	0	440	18.768	1.0009	440	21.789	1.16201	440	3.887	0.207294	440	3.399	0.181269	440	0	0	440	12.828	0.684117	440	15.811	0.843201	440	30.641	1.63408	440	16.55	0.882612	440	16.72	0.891678	440	25.267
444	25.632	1.36695	444	16.5	0.879945	444	15.24	0.812749	444	0	0	444	23.431	1.24958	444	0	0	444	21.024	1.12121	444	18.785	1.0018	444	4.853	0.25881	444	4.346	0.231772	444	7.008	0.373737	444	14.757	0.786991	444	15.202	0.810723	444	29.031	1.54822	444	17.464	0.931355	444	18.236	0.972526	444	23.704
448	30.676	1.63595	448	0	0	448	14.213	0.757979	448	0	0	448	25.656	1.36823	448	0	0	448	11.18	0.596229	448	21.468	1.14489	448	7.211	0.384563	448	11.571	0.617081	448	8.393	0.447599	448	16.347	0.871786	448	18.151	0.967993	448	29.219	1.55825	448	15.206	0.810936	448	13.667	0.728861	448	22.423
452	29.3	1.56257	452	0	0	452	16.378	0.873439	452	0	0	452	23.77	1.26765	452	0	0	452	14.327	0.764059	452	19.419	1.03562	452	6.642	0.354218	452	9	0.47997	452	10.138	0.54066	452	18.043	0.962233	452	16.221	0.865066	452	31.113	1.65926	452	14.488	0.772645	452	19.209	1.02442	452	23.9
456	24.187	1.28989	456	0	0	456	17.678	0.942768	456	2.5	0.133325	456	19.3	1.02927	456	2.5	0.133325	456	18.31	0.976472	456	10.76	0.573831	456	10.467	0.558205	456	9.428	0.502795	456	11.494	0.612975	456	19.565	1.0434	456	13.507	0.720328	456	31.828	1.69739	456	7.126	0.38003	456	10.296	0.549086	456	17
460	23.712	1.26456	460	0	0	460	19.912	1.06191	460	1.5	0.079995	460	17.103	0.912103	460	1.5	0.079995	460	13.865	0.73942	460	18.336	0.977859	460	10.088	0.537993	460	12.005	0.640227	460	11.667	0.622201	460	24.938	1.32994	460	10.296	0.549086	460	37.132	1.98025	460	7.667	0.408881	460	9.262	0.493942	460	18.196
464	22.361	1.19251	464	0	0	464	20.18	1.0762	464	4.031	0.214973	464	12.59	0.671425	464	4.031	0.214973	464	12.42	0.662359	464	18.514	0.987352	464	4.346	0.231772	464	14.337	0.764592	464	12.579	0.670838	464	29.831	1.59089	464	13.004	0.693503	464	34.963	1.86458	464	7.667	0.408881	464	14.461	0.771205	464	16.014
468	21.219	1.13161	468	0	0	468	15.692	0.836854	468	5.22	0.278383	468	8.515	0.454105	468	5.22	0.278383	468	10.63	0.566898	468	18.135	0.96714	468	5.207	0.277689	468	18.409	0.981752	468	12.405	0.661559	468	24.588	1.31128	468	7.696	0.410428	468	36.535	1.94841	468	8.393	0.447599	468	12.166	0.648813	468	23.57
472	19.5	1.03994	472	6	0.31998	472	18.028	0.961433	472	5.59	0.298115	472	7.106	0.378963	472	5.59	0.298115	472	9.434	0.503115	472	21.2	1.1306	472	2.687	0.143298	472	17.78	0.948207	472	12.983	0.692383	472	22.073	1.17715	472	10.198	0.543859	472	38.681	2.06286	472	9.387	0.500609	472	14.43	0.769552	472	22.786
476	19.039	1.01535	476	4.472	0.238492	476	16.225	0.865279	476	14.009	0.7471	476	1.803	0.096154	476	14.009	0.7471	476	10.966	0.584817	476	17.143	0.914236	476	4.679	0.249531	476	16.251	0.866666	476	8.028	0.428133	476	28.052	1.49601	476	10.419	0.555645	476	41.012	2.18717	476	8.439	0.450052	476	13.371	0.713075	476	18.003
480	15.116	0.806136	480	3.536	0.188575	480	15.788	0.841974	480	6.519	0.347658	480	0	0	480	6.519	0.347658	480	9.925	0.5293	480	10.44	0.556765	480	5.27	0.281049	480	20.069	1.07028	480	8.233	0.439066	480	36.94	1.97001	480	13.482	0.718995	480	36.252	1.93332	480	7.923	0.422534	480	11.245	0.599696	480	20.011
484	16.348	0.871839	484	4.95	0.263984	484	14.5	0.773285	484	11.543	0.615588	484	0	0	484	11.543	0.615588	484	10	0.5333	484	14.318	0.763579	484	6.741	0.359498	484	19.093	1.01823	484	2.867	0.152897	484	39.001	2.07992	484	9.387	0.500609	484	40.498	2.15976	484	9.025	0.481303	484	11.926	0.636014	484	25.597
488	9.434	0.503115	488	7.159	0.381789	488	12.176	0.649346	488	10.77	0.574364	488	9.849	0.525247	488	10.77	0.574364	488	15.524	0.827895	488	17.337	0.924582	488	8.439	0.450052	488	19.889	1.06068	488	5.897	0.314487	488	25.721	1.3717	488	14.252	0.760059	488	41.074	2.19048	488	9.387	0.500609	488	10.339	0.551379	488	31.362
492	9	0.47997	492	10.512	0.560605	492	9.014	0.480717	492	13.601	0.725341	492	10.966	0.584817	492	13.601	0.725341	492	13.285	0.708489	492	17.082	0.910983	492	9.357	0.499009	492	19.394	1.03428	492	3.727	0.198761	492	24.877	1.32669	492	20.248	1.07983	492	43.092	2.2981	492	9.621	0.513088	492	7.696	0.410428	492	28.57
496	7.5	0.399975	496	11.5	0.613295	496	0	0	496	12.777	0.681397	496	11.673	0.622521	496	12.777	0.681397	496	19.558	1.04303	496	18.391	0.980792	496	11.411	0.608549	496	17.464	0.931355	496	2.427	0.129432	496	23.462	1.25123	496	13.683	0.729714	496	42.937	2.28983	496	11.479	0.612175	496	8.393	0.447599	496	22.961
500	4	0.21332	500	11.5	0.613295	500	0	0	500	8.902	0.474744	500	8.062	0.429946	500	8.902	0.474744	500	19.039	1.01535	500	17.714	0.944688	500	9.718	0.518261	500	11.18	0.596229	500	6.566	0.350165	500	26.03	1.38818	500	12.405	0.661559	500	45.856	2.4455	500	10.296	0.549086	500	9.621	0.513088	500	22.091
504	5.5	0.293315	504	14.534	0.775098	504	0	0	504	13.01	0.693823	504	14.08	0.750886	504	13.01	0.693823	504	19.449	1.03722	504	20.011	1.06719	504	12.966	0.691477	504	4.738	0.252678	504	5.27	0.281049	504	24.361	1.29917	504	6.864	0.366057	504	50.572	2.697	504	13.038	0.695317	504	5.676	0.302701	504	17.448
508	8	0.42664	508	16.5	0.879945	508	0	0	508	17.414	0.928689	508	8.631	0.460291	508	17.414	0.928689	508	22.611	1.20584	508	21.934	1.16974	508	18.306	0.976259	508	0	0	508	5.077	0.270756	508	18.658	0.995031	508	7	0.37331	508	47.893	2.55413	508	11.035	0.588497	508	3.682	0.196361	508	15.951
512	7.517	0.400882	512	14.714	0.784698	512	0	0	512	13.657	0.728328	512	8.559	0.456451	512	13.657	0.728328	512	19.3	1.02927	512	20.616	1.09945	512	21.095	1.125	512	0	0	512	5	0.26665	512	21.838	1.16462	512	6.333	0.337739	512	49.924	2.66245	512	7.454	0.397522	512	5.907	0.31502	512	15.563
516	5	0.26665	516	18.561	0.989858	516	13.928	0.74278	516	13.2	0.703956	516	11.102	0.59207	516	13.2	0.703956	516	24.01	1.28045	516	21.914	1.16867	516	19.737	1.05257	516	2.848	0.151884	516	4.643	0.247611	516	19.359	1.03242	516	5.217	0.278223	516	41.8	2.22919	516	3.48	0.185588	516	6.549	0.349258	516	17.717
520	6.576	0.350698	520	17.72	0.945008	520	0	0	520	13.463	0.717982	520	10.112	0.539273	520	13.463	0.717982	520	21.36	1.13913	520	24.822	1.32376	520	19.712	1.05124	520	4	0.21332	520	0	0	520	19.29	1.02874	520	5.676	0.302701	520	33.706	1.79754	520	3.333	0.177749	520	9.989	0.532713	520	13.371
524	7	0.37331	524	19.3	1.02927	524	6.727	0.358751	524	13.463	0.717982	524	7	0.37331	524	13.463	0.717982	524	22.209	1.18441	524	25.145	1.34098	524	12.405	0.661559	524	4.123	0.21988	524	0	0	524	13.732	0.732328	524	8.439	0.450052	524	30.818	1.64352	524	0	0	524	6.403	0.341472	524	11.571
528	11.511	0.613882	528	19.906	1.06159	528	10.512	0.560605	528	10.735	0.572498	528	11.597	0.618468	528	10.735	0.572498	528	22.472	1.19843	528	27.203	1.45074	528	9.22	0.491703	528	8.969	0.478317	528	0	0	528	13.017	0.694197	528	12.078	0.64412	528	30.267	1.61414	528	0	0	528	6.128	0.326806	528	14.02
532	11	0.58663	532	18.795	1.00234	532	11.853	0.63212	532	10.296	0.549086	532	9.5	0.506635	532	10.296	0.549086	532	17.464	0.931355	532	27.83	1.48417	532	5.548	0.295875	532	4.269	0.227666	532	0	0	532	16.499	0.879892	532	13.321	0.710409	532	22.403	1.19475	532	0	0	532	8.233	0.439066	532	9.69
536	13.01	0.693823	536	21.243	1.13289	536	15.532	0.828322	536	6.021	0.3211	536	7.159	0.381789	536	6.021	0.3211	536	14.089	0.751366	536	29.887	1.59387	536	7.126	0.38003	536	6.708	0.357738	536	0	0	536	24.777	1.32136	536	12.671	0.675744	536	18.856	1.00559	536	0	0	536	11.609	0.619108	536	18.003
540	19.526	1.04132	540	20.408	1.08836	540	7.5	0.399975	540	2.693	0.143618	540	4.743	0.252944	540	2.693	0.143618	540	9.22	0.491703	540	32.76	1.74709	540	5.175	0.275983	540	5.588	0.298008	540	0	0	540	22.023	1.17449	540	15.92	0.849014	540	17.208	0.917703	540	5.217	0.278223	540	11.04	0.588763	540	16.125
544	12.166	0.648813	544	21.477	1.14537	544	0	0	544	0	0	544	0	0	544	0	0	544	7.382	0.393682	544	29.833	1.59099	544	6.412	0.341952	544	6.412	0.341952	544	4.667	0.248891	544	26.183	1.39634	544	16.846	0.898397	544	12.12	0.64636	544	9.055	0.482903	544	12.229	0.652173	544	16.017
548	14.009	0.7471	548	17.103	0.912103	548	4.301	0.229372	548	8.732	0.465678	548	4.472	0.238492	548	8.732	0.465678	548	7.159	0.381789	548	32.098	1.71179	548	9.545	0.509035	548	7.454	0.397522	548	3.801	0.202707	548	21.232	1.1323	548	18.785	1.0018	548	8.11	0.432506	548	6.227	0.332086	548	12.824	0.683904	548	18.003
552	14.431	0.769605	552	20.156	1.07492	552	7.106	0.378963	552	10.548	0.562525	552	0	0	552	10.548	0.562525	552	6.708	0.357738	552	26.926	1.43596	552	14.349	0.765232	552	4.269	0.227666	552	4.014	0.214067	552	21.667	1.1555	552	19.565	1.0434	552	6.799	0.362591	552	6.009	0.32046	552	13.072	0.69713	552	17.49
556	20.156	1.07492	556	19.609	1.04575	556	7.826	0.417361	556	4.743	0.252944	556	0	0	556	4.743	0.252944	556	7.433	0.396402	556	20.23	1.07887	556	9.707	0.517674	556	4.346	0.231772	556	6.009	0.32046	556	30.083	1.60433	556	22.236	1.18585	556	5.077	0.270756	556	7.601	0.405361	556	13.499	0.719902	556	21.69
560	19	1.01327	560	18.848	1.00516	560	5.5	0.293315	560	9.179	0.489516	560	0	0	560	9.179	0.489516	560	10.308	0.549726	560	17.671	0.942394	560	10	0.5333	560	7.557	0.403015	560	5.831	0.310967	560	26.335	1.40445	560	24.449	1.30387	560	4.472	0.238492	560	11.411	0.608549	560	14.162	0.755259	560	13.671
564	21.148	1.12782	564	20.815	1.11006	564	8.602	0.458745	564	12.806	0.682944	564	7.81	0.416507	564	12.806	0.682944	564	11.705	0.624228	564	6.671	0.355764	564	9.333	0.497729	564	5.897	0.314487	564	8.34	0.444772	564	21.69	1.15673	564	24.178	1.28941	564	6.083	0.324406	564	12.494	0.666305	564	12.53	0.668225	564	14.004
568	17.529	0.934822	568	19.059	1.01642	568	11.63	0.620228	568	11.715	0.624761	568	16.621	0.886398	568	11.715	0.624761	568	12.01	0.640493	568	8.276	0.441359	568	7.126	0.38003	568	7.341	0.391496	568	6.009	0.32046	568	18.151	0.967993	568	20.396	1.08772	568	7.311	0.389896	568	14.252	0.760059	568	14.063	0.74998	568	13.864
572	12.51	0.667158	572	21.523	1.14782	572	7.433	0.396402	572	10.259	0.547112	572	15.305	0.816216	572	10.259	0.547112	572	16.155	0.861546	572	11.402	0.608069	572	5.667	0.302221	572	5.831	0.310967	572	7.674	0.409254	572	23.405	1.24819	572	26.352	1.40535	572	7.211	0.384563	572	13.333	0.711049	572	7.674	0.409254	572	10.088
576	9.014	0.480717	576	19.026	1.01466	576	13.314	0.710036	576	9.849	0.525247	576	15.207	0.810989	576	9.849	0.525247	576	6.5	0.346645	576	12.093	0.64492	576	2.749	0.146604	576	8.975	0.478637	576	8.233	0.439066	576	23.286	1.24184	576	26.8	1.42924	576	10	0.5333	576	14.727	0.785391	576	9.098	0.485196	576	12.351
580	10.512	0.560605	580	14.5	0.773285	580	7.906	0.421627	580	12.748	0.679851	580	14.213	0.757979	580	12.748	0.679851	580	8.139	0.434053	580	13.01	0.693823	580	0	0	580	8.062	0.429946	580	9.69	0.516768	580	14.063	0.74998	580	30.335	1.61777	580	8.724	0.465251	580	14.727	0.785391	580	12.867	0.686197	580	9.333
584	15.5	0.826615	584	12.093	0.64492	584	10.44	0.556765	584	10.7	0.570631	584	4.528	0.241478	584	10.7	0.570631	584	12.51	0.667158	584	12.379	0.660172	584	4.346	0.231772	584	7.667	0.408881	584	12.618	0.672918	584	19.026	1.01466	584	24.723	1.31848	584	12.297	0.655799	584	15.755	0.840214	584	10.899	0.581244	584	13.703
588	11.511	0.613882	588	7.762	0.413947	588	6.103	0.325473	588	12.981	0.692277	588	10.308	0.549726	588	12.981	0.692277	588	20.131	1.07359	588	13.865	0.73942	588	4.346	0.231772	588	6.009	0.32046	588	13.153	0.701449	588	10.176	0.542686	588	25.336	1.35117	588	17.026	0.907997	588	19.235	1.0258	588	12.828	0.684117	588	15.348
592	11.045	0.58903	592	5.701	0.304034	592	10.794	0.575644	592	18.901	1.00799	592	13.038	0.695317	592	18.901	1.00799	592	18.554	0.989485	592	15.5	0.826615	592	4.679	0.249531	592	8.172	0.435813	592	14.701	0.784004	592	11.709	0.624441	592	27.867	1.48615	592	12.494	0.666305	592	17.951	0.957327	592	9.69	0.516768	592	15.333
596	8.515	0.454105	596	5.408	0.288409	596	6.5	0.346645	596	19.416	1.03546	596	10.512	0.560605	596	19.416	1.03546	596	18.742	0.999511	596	19.449	1.03722	596	4.028	0.214813	596	7.491	0.399495	596	15.723	0.838508	596	14.067	0.750193	596	28.115	1.49937	596	13.408	0.715049	596	15.624	0.833228	596	10.899	0.581244	596	13.703
600	9.5	0.506635	600	5.025	0.267983	600	0	0	600	23.049	1.2292	600	7.211	0.384563	600	23.049	1.2292	600	23.521	1.25437	600	18.5	0.986605	600	7.341	0.391496	600	8.353	0.445465	600	16.169	0.862293	600	16.344	0.871626	600	25.267	1.34749	600	12.338	0.657986	600	15.709	0.837761	600	14.126	0.75334	600	18.577
Length stats
MAX	41.8	2.22919		32.653	1.74138		29.262	1.56054		35.331	1.8842		27.536	1.46849		35.331	1.8842		29.703	1.58406		32.76	1.74709		23.688	1.26328		20.377	1.08671		39.672	2.11571		39.001	2.07992		30.335	1.61777		50.572	2.697		32.202	1.71733		35.201	1.87727		49.222
MIN	0	0		0	0		0	0		0	0		0	0		0	0		3.808	0.203081		4.485	0.239185		0	0		0	0		0	0		4.922	0.26249		0	0		2.848	0.151884		0	0		0	0		9.333
AVG	15.3742	0.819904		14.6177	0.779562		9.27675	0.494729		13.0361	0.695217		10.847	0.578469		13.0361	0.695217		14.8164	0.790158		15.0195	0.800992		9.56709	0.510213		11.0049	0.586893		10.1008	0.538676		16.9882	0.905978		12.6165	0.672835		16.9512	0.904005		11.773	0.627852		12.3808	0.660266		26.0027
MEDIAN	14.5	0.773285		14.534	0.775098		8.602	0.458745		13.463	0.717982		10.124	0.539913		13.463	0.717982		14.16	0.755153		13.437	0.716595		9.098	0.485196		11.205	0.597563		8.34	0.444772		16.2	0.863946		11.968	0.638253		14.337	0.764592		10.022	0.534473		11.04	0.588763		24.984
[truncated: 7 more columns]

## Sheet: WT rates
Date	Section Number	Start Time	End Time	Start Length	End Length	Duration	L change	Polymerization rate	Depolymerization rate	sse	rsquare	dfe	adjrsquare	rmse	Rescue number	Rescue frequency	Catastrophe number	Catastrophe frequency	Total polymerization time	Total depolymerization time	Percent paused	Dynamicity		Polymerization average		Depolymerization average
'1'	1	40	64	32.319	15.524	24	16.795	0	41.9875	10.2077	0.958478	5	0.950174	1.42882	3	0.523256	5	1.1194	120	196	31.8966	0.488614
'1'	4	100	124	8.276	18.868	24	10.592	26.48	0	15.7474	0.891424	5	0.869708	1.77468	0	0	0	0	0	0	0	0
'1'	7	152	208	27.042	5.59	56	21.452	0	22.9843	92.8487	0.904046	13	0.896665	2.67249	0	0	0	0	0	0	0	0
'1'	10	252	292	0	18.118	40	18.118	27.177	0	48.0518	0.834006	9	0.815562	2.31065	0	0	0	0	0	0	0	0
'1'	13	292	308	18.118	10.012	16	8.106	0	30.3975	3.49165	0.909856	3	0.879808	1.07883	0	0	0	0	0	0	0	0
'1'	15	348	396	26.239	0	48	26.239	0	32.7987	202.959	0.833039	11	0.81786	4.29544	0	0	0	0	0	0	0	0
'1'	16	396	452	0	29.3	56	29.3	31.3929	0	47.0889	0.957787	13	0.95454	1.90321	0	0	0	0	0	0	0	0
'1'	17	452	504	29.3	5.5	52	23.8	0	27.4615	30.4457	0.962493	12	0.959368	1.59284	0	0	0	0	0	0	0	0		28.35		31.1259
'2'	1	44	72	31.085	3.354	28	27.731	0	59.4236	64.3181	0.927758	6	0.915718	3.27409	5	2.14286	5	0.852273	352	140	0	0.41261
'2'	2	72	108	3.354	23.033	36	19.679	32.7983	0	16.5796	0.965246	8	0.960902	1.4396	0	0	0	0	0	0	0	0
'2'	3	108	156	23.033	3.606	48	19.427	0	24.2838	108.317	0.829993	11	0.814537	3.13799	0	0	0	0	0	0	0	0
'2'	4	156	280	3.606	27.295	124	23.689	11.4624	0	43.5115	0.975744	30	0.974936	1.20432	0	0	0	0	0	0	0	0
'2'	5	280	308	27.295	6.103	28	21.192	0	45.4114	69.7926	0.887546	6	0.868804	3.41059	0	0	0	0	0	0	0	0
'2'	6	308	376	6.103	23.135	68	17.032	15.0282	0	46.6959	0.888165	16	0.881175	1.70836	0	0	0	0	0	0	0	0
'2'	7	376	400	23.135	2.062	24	21.073	0	52.6825	20.2667	0.939815	5	0.927778	2.01329	0	0	0	0	0	0	0	0
'2'	8	400	440	2.062	17	40	14.938	22.407	0	24.0572	0.909438	9	0.899376	1.63494	0	0	0	0	0	0	0	0
'2'	9	440	452	17	0	12	17	0	85	52.875	0.811623	2	0.717435	5.14174	0	0	0	0	0	0	0	0
'2'	10	452	536	0	21.243	84	21.243	15.1736	0	52.8187	0.95716	20	0.955018	1.62509	0	0	0	0	0	0	0	0		19.3739		53.3602
'3'	1	64	100	26.401	3.536	36	22.865	0	38.1083	60.2048	0.924631	8	0.91521	2.74328	5	0.949367	7	1.66667	128	192	27.9279	0.536241
'3'	3	124	164	18.344	2.693	40	15.651	0	23.4765	65.8437	0.825632	9	0.806257	2.7048	0	0	0	0	0	0	0	0
'3'	4	164	176	2.693	12.349	12	9.656	48.28	0	1.65994	0.966831	2	0.950247	0.911027	0	0	0	0	0	0	0	0
'3'	5	176	192	12.349	2	16	10.349	0	38.8088	0.833925	0.988554	3	0.984738	0.527233	0	0	0	0	0	0	0	0
'3'	12	260	268	0	11.885	8	11.885	89.1375	0	0.771134	0.989199	1	0.978399	0.878142	0	0	0	0	0	0	0	0
'3'	13	268	284	11.885	0	16	11.885	0	44.5688	1.68245	0.978843	3	0.971791	0.748878	0	0	0	0	0	0	0	0
'3'	14	284	316	0	14.396	32	14.396	26.9925	0	12.5318	0.953744	7	0.947136	1.338	0	0	0	0	0	0	0	0
'3'	17	348	364	17.464	0	16	17.464	0	65.49	23.1409	0.918179	3	0.890905	2.77734	0	0	0	0	0	0	0	0
'3'	18	364	396	0	10.124	32	10.124	18.9825	0	30.4205	0.807744	7	0.780279	2.08465	0	0	0	0	0	0	0	0
'3'	19	396	420	10.124	1.581	24	8.543	0	21.3575	13.2769	0.811805	5	0.774166	1.62953	0	0	0	0	0	0	0	0
'3'	20	420	464	1.581	20.18	44	18.599	25.3623	0	23.1438	0.939413	10	0.933354	1.52131	0	0	0	0	0	0	0	0
'3'	21	464	508	20.18	0	44	20.18	0	27.5182	83.3408	0.880682	10	0.86875	2.88688	0	0	0	0	0	0	0	0		41.751		37.0469
'4'	6	36	64	22.322	0	28	22.322	0	47.8329	57.973	0.913429	6	0.899	3.1084	4	0.689655	7	1.41892	188	240	20.1493	0.466834
'4'	7	64	88	0	17.889	24	17.889	44.7225	0	31.5489	0.879626	5	0.855551	2.51193	0	0	0	0	0	0	0	0
'4'	10	96	104	17.088	15.788	8	1.3	0	9.75	0.001944	0.997705	1	0.995409	0.0440908	0	0	0	0	0	0	0	0
'4'	11	104	136	15.788	24.824	32	9.036	16.9425	0	17.9496	0.841654	7	0.819033	1.60132	0	0	0	0	0	0	0	0
'4'	12	136	164	24.824	2.5	28	22.324	0	47.8371	38.5396	0.934272	6	0.923318	2.53442	0	0	0	0	0	0	0	0
'4'	13	164	216	2.5	23.087	52	20.587	23.7542	0	41.052	0.918427	12	0.91163	1.84959	0	0	0	0	0	0	0	0
'4'	14	216	264	23.087	1.803	48	21.284	0	26.605	41.1846	0.923961	11	0.917048	1.93496	0	0	0	0	0	0	0	0
'4'	15	264	344	1.803	35.331	80	33.528	25.146	0	276.129	0.863337	19	0.856144	3.81223	0	0	0	0	0	0	0	0
'4'	16	344	432	35.331	0	88	35.331	0	24.0893	153.77	0.936788	21	0.933778	2.70599	0	0	0	0	0	0	0	0
'4'	20	512	544	13.657	0	32	13.657	0	25.6069	31.8362	0.850392	7	0.829019	2.13261	0	0	0	0	0	0	0	0
'4'	26	564	572	12.806	10.259	8	2.547	0	19.1025	0.0222042	0.993201	1	0.986402	0.149011	0	0	0	0	0	0	0	0		27.6413		28.6891
'5'	1	32	68	26.387	5.701	36	20.686	0	34.4767	13.1721	0.977101	8	0.974238	1.28316	7	1.3125	4	0.566038	216	112	38.806	0.459198
'5'	2	68	120	5.701	17.357	52	11.656	13.4492	0	27.7224	0.89166	12	0.882632	1.51993	0	0	0	0	0	0	0	0
'5'	6	168	192	2.5	12.021	24	9.521	23.8025	0	11.2551	0.89341	5	0.872092	1.50034	0	0	0	0	0	0	0	0
'5'	11	260	276	10.92	7.433	16	3.487	0	13.0762	1.66335	0.816464	3	0.755285	0.744613	0	0	0	0	0	0	0	0
'5'	12	276	284	7.433	11.597	8	4.164	31.23	0	0.164673	0.981359	1	0.962719	0.405799	0	0	0	0	0	0	0	0
'5'	14	312	336	0	11.102	24	11.102	27.755	0	19.858	0.822751	5	0.787302	1.99289	0	0	0	0	0	0	0	0
'5'	15	336	364	11.102	0	28	11.102	0	23.79	25.6738	0.855107	6	0.830958	2.06857	0	0	0	0	0	0	0	0
'5'	16	364	448	0	25.656	84	25.656	18.3257	0	53.4586	0.952547	20	0.950174	1.63491	0	0	0	0	0	0	0	0
'5'	17	448	480	25.656	0	32	25.656	0	48.105	5.22759	0.992334	7	0.991239	0.864175	0	0	0	0	0	0	0	0
'5'	18	480	492	0	10.966	12	10.966	54.83	0	17.5746	0.838676	2	0.758014	2.96434	0	0	0	0	0	0	0	0
'5'	24	556	568	0	16.621	12	16.621	83.105	0	21.7266	0.884455	2	0.826682	3.29595	0	0	0	0	0	0	0	0		36.0711		29.862
'6'	6	36	64	22.322	0	28	22.322	0	47.8329	57.973	0.913429	6	0.899	3.1084	4	0.689655	7	1.41892	188	240	20.1493	0.466834
'6'	7	64	88	0	17.889	24	17.889	44.7225	0	31.5489	0.879626	5	0.855551	2.51193	0	0	0	0	0	0	0	0
'6'	10	96	104	17.088	15.788	8	1.3	0	9.75	0.001944	0.997705	1	0.995409	0.0440908	0	0	0	0	0	0	0	0
'6'	11	104	136	15.788	24.824	32	9.036	16.9425	0	17.9496	0.841654	7	0.819033	1.60132	0	0	0	0	0	0	0	0
'6'	12	136	164	24.824	2.5	28	22.324	0	47.8371	38.5396	0.934272	6	0.923318	2.53442	0	0	0	0	0	0	0	0
'6'	13	164	216	2.5	23.087	52	20.587	23.7542	0	41.052	0.918427	12	0.91163	1.84959	0	0	0	0	0	0	0	0
'6'	14	216	264	23.087	1.803	48	21.284	0	26.605	41.1846	0.923961	11	0.917048	1.93496	0	0	0	0	0	0	0	0
'6'	15	264	344	1.803	35.331	80	33.528	25.146	0	276.129	0.863337	19	0.856144	3.81223	0	0	0	0	0	0	0	0
'6'	16	344	432	35.331	0	88	35.331	0	24.0893	153.77	0.936788	21	0.933778	2.70599	0	0	0	0	0	0	0	0
'6'	20	512	544	13.657	0	32	13.657	0	25.6069	31.8362	0.850392	7	0.829019	2.13261	0	0	0	0	0	0	0	0
'6'	26	564	572	12.806	10.259	8	2.547	0	19.1025	0.0222042	0.993201	1	0.986402	0.149011	0	0	0	0	0	0	0	0		27.6413		28.6891
'7'	1	24	60	28.364	7.106	36	21.258	0	35.43	39.8434	0.919923	8	0.909913	2.23169	8	1.5	5	0.721154	220	124	36.2963	0.531927
'7'	2	60	84	7.106	21.57	24	14.464	36.16	0	2.48049	0.985603	5	0.982724	0.704343	0	0	0	0	0	0	0	0
'7'	6	120	132	6.103	13.01	12	6.907	34.535	0	2.01149	0.938199	2	0.907299	1.00287	0	0	0	0	0	0	0	0
'7'	12	172	212	10.124	25.986	40	15.862	23.793	0	19.8711	0.944726	9	0.938584	1.4859	0	0	0	0	0	0	0	0
'7'	13	212	236	25.986	3.808	24	22.178	0	55.445	29.7443	0.936481	5	0.923777	2.43903	0	0	0	0	0	0	0	0
'7'	14	236	284	3.808	20.815	48	17.007	21.2587	0	55.9672	0.891312	11	0.881431	2.25564	0	0	0	0	0	0	0	0
'7'	15	284	292	20.815	11.402	8	9.413	0	70.5975	2.18045	0.953091	1	0.906182	1.47663	0	0	0	0	0	0	0	0
'7'	17	312	332	20.573	10.112	20	10.461	0	31.383	1.07576	0.984192	4	0.98024	0.518594	0	0	0	0	0	0	0	0
'7'	19	332	344	10.112	17.493	12	7.381	36.905	0	4.02019	0.903829	2	0.855743	1.41778	0	0	0	0	0	0	0	0
'7'	28	396	432	4.95	26.618	36	21.668	36.1133	0	79.0939	0.874194	8	0.858468	3.14432	0	0	0	0	0	0	0	0
'7'	30	480	516	9.925	24.01	36	14.085	23.475	0	34.6183	0.840408	8	0.820459	2.08021	0	0	0	0	0	0	0	0
'7'	31	516	552	24.01	6.708	36	17.302	0	28.8367	37.3551	0.918364	8	0.90816	2.16088	0	0	0	0	0	0	0	0
'7'	32	552	564	6.708	11.705	12	4.997	24.985	0	0.771015	0.953916	2	0.930874	0.620893	0	0	0	0	0	0	0	0		29.6531		44.3384
'8'	1	8	60	29.122	8.138	52	20.984	0	24.2123	110.434	0.870893	12	0.860134	3.03361	7	1.15385	5	0.669643	196	112	45	0.468464
'8'	6	84	124	6.403	21.045	40	14.642	21.963	0	5.13101	0.976556	9	0.973951	0.755058	0	0	0	0	0	0	0	0
'8'	8	148	156	4.485	17.867	8	13.382	100.365	0	0.587814	0.993478	1	0.986956	0.76669	0	0	0	0	0	0	0	0
'8'	14	228	252	9.333	16.035	24	6.702	16.755	0	2.32084	0.953367	5	0.94404	0.681299	0	0	0	0	0	0	0	0
'8'	15	252	260	16.035	12.405	8	3.63	0	27.225	0.6144	0.9147	1	0.829401	0.783837	0	0	0	0	0	0	0	0
'8'	18	312	320	8.233	12.526	8	4.293	32.1975	0	0.612482	0.937676	1	0.875352	0.782612	0	0	0	0	0	0	0	0
'8'	20	332	352	9.809	20.766	20	10.957	32.871	0	10.9032	0.901059	4	0.876324	1.651	0	0	0	0	0	0	0	0
'8'	25	392	404	17.337	8.498	12	8.839	0	44.195	4.10257	0.925116	2	0.887674	1.43223	0	0	0	0	0	0	0	0
'8'	26	404	448	8.498	21.468	44	12.97	17.6864	0	39.9137	0.817203	10	0.798923	1.99784	0	0	0	0	0	0	0	0
'8'	27	448	456	21.468	10.76	8	10.708	0	80.31	7.28202	0.887297	1	0.774595	2.69852	0	0	0	0	0	0	0	0
'8'	30	484	536	14.318	29.887	52	15.569	17.9642	0	11.8359	0.958075	12	0.954582	0.993137	0	0	0	0	0	0	0	0
'8'	31	536	568	29.887	8.276	32	21.611	0	40.5206	133.59	0.834316	7	0.810647	4.36855	0	0	0	0	0	0	0	0		34.2574		43.2926
'9'	1	32	48	15.506	5.426	16	10.08	0	37.8	22.7687	0.811361	3	0.748482	2.75492	6	1.01124	8	1.2766	192	172	33.5766	0.42572
'9'	2	48	76	5.426	11.04	28	5.614	12.03	0	1.94598	0.934119	6	0.923139	0.5695	0	0	0	0	0	0	0	0
'9'	5	76	100	11.04	6.667	24	4.373	0	10.9325	4.43313	0.802935	5	0.763522	0.941608	0	0	0	0	0	0	0	0
'9'	9	156	168	10.355	6.263	12	4.092	0	20.46	1.44518	0.833298	2	0.749946	0.850052	0	0	0	0	0	0	0	0
'9'	10	168	200	6.263	16.465	32	10.202	19.1288	0	10.9046	0.915753	7	0.903717	1.24812	0	0	0	0	0	0	0	0
'9'	11	200	224	16.465	6.037	24	10.428	0	26.07	7.63519	0.934671	5	0.921605	1.23573	0	0	0	0	0	0	0	0
'9'	12	224	232	6.037	9.707	8	3.67	27.525	0	0.146016	0.978778	1	0.957556	0.38212	0	0	0	0	0	0	0	0
'9'	16	276	328	3.801	23.688	52	19.887	22.9465	0	57.6913	0.871009	12	0.86026	2.19263	0	0	0	0	0	0	0	0
'9'	17	328	360	23.688	2.108	32	21.58	0	40.4625	15.9923	0.964484	7	0.95941	1.51149	0	0	0	0	0	0	0	0
'9'	21	404	424	12.806	0	20	12.806	0	38.418	4.67942	0.967219	4	0.959023	1.0816	0	0	0	0	0	0	0	0
'9'	22	424	452	0	6.642	28	6.642	14.2329	0	2.92564	0.923012	6	0.910181	0.698288	0	0	0	0	0	0	0	0
'9'	24	472	516	2.687	19.737	44	17.05	23.25	0	30.6975	0.924461	10	0.916907	1.75207	0	0	0	0	0	0	0	0
'9'	25	516	532	19.737	5.548	16	14.189	0	53.2088	8.99898	0.943787	3	0.925049	1.73195	0	0	0	0	0	0	0	0
'9'	27	552	580	14.349	0	28	14.349	0	30.7479	8.85481	0.938323	6	0.928044	1.21483	0	0	0	0	0	0	0	0		19.8522		32.2625
'10'	2	16	56	5.897	18.077	40	12.18	18.27	0	16.4389	0.891266	9	0.879185	1.3515	5	0.882353	7	1.1413	156	128	42.7419	0.46081
'10'	7	88	108	14.43	5.385	20	9.045	0	27.135	8.51634	0.874699	4	0.843373	1.45914	0	0	0	0	0	0	0	0
'10'	8	108	128	5.385	12.88	20	7.495	22.485	0	5.06166	0.856244	4	0.820305	1.12491	0	0	0	0	0	0	0	0
'10'	10	128	136	12.88	8.667	8	4.213	0	31.5975	0.00686817	0.999227	1	0.998453	0.0828744	0	0	0	0	0	0	0	0
'10'	13	192	220	14.099	3.162	28	10.937	0	23.4364	28.7601	0.831309	6	0.803194	2.18937	0	0	0	0	0	0	0	0
'10'	14	220	252	3.162	19.09	32	15.928	29.865	0	15.9311	0.933021	7	0.923453	1.5086	0	0	0	0	0	0	0	0
'10'	16	268	284	12.401	20.377	16	7.976	29.91	0	4.85315	0.857254	3	0.809672	1.27189	0	0	0	0	0	0	0	0
'10'	17	284	300	20.377	11.785	16	8.592	0	32.22	1.63018	0.962443	3	0.949924	0.737153	0	0	0	0	0	0	0	0
'10'	23	392	412	19.437	6.146	20	13.291	0	39.873	6.60446	0.939416	4	0.924271	1.28496	0	0	0	0	0	0	0	0
'10'	25	428	440	8.233	3.399	12	4.834	0	24.17	0.855062	0.947009	2	0.920514	0.653858	0	0	0	0	0	0	0	0
'10'	26	440	488	3.399	19.889	48	16.49	20.6125	0	46.9335	0.881046	11	0.870232	2.06559	0	0	0	0	0	0	0	0
'10'	27	488	512	19.889	0	24	19.889	0	49.7225	28.3453	0.939667	5	0.927601	2.38098	0	0	0	0	0	0	0	0		24.2285		32.5935
'11'	1	96	144	25.612	6.128	48	19.484	0	24.355	157.089	0.837994	11	0.823266	3.77899	4	1.07143	5	1.2931	176	168	14	0.499526
'11'	2	144	168	6.128	17.324	24	11.196	27.99	0	2.91488	0.972962	5	0.967555	0.763529	0	0	0	0	0	0	0	0
'11'	3	168	196	17.324	0	28	17.324	0	37.1229	23.1733	0.942558	6	0.932985	1.96525	0	0	0	0	0	0	0	0
'11'	6	252	320	0	37.202	68	37.202	32.8253	0	160.771	0.951032	16	0.947972	3.16989	0	0	0	0	0	0	0	0
'11'	7	320	356	37.202	3.543	36	33.659	0	56.0983	39.9032	0.962591	8	0.957915	2.23336	0	0	0	0	0	0	0	0
'11'	8	356	412	3.543	17.804	56	14.261	15.2796	0	18.8006	0.932657	13	0.927477	1.20258	0	0	0	0	0	0	0	0
'11'	9	412	432	17.804	0	20	17.804	0	53.412	8.37028	0.966908	4	0.958635	1.44657	0	0	0	0	0	0	0	0
'11'	10	432	460	0	11.667	28	11.667	25.0007	0	20.1759	0.896056	6	0.878732	1.83375	0	0	0	0	0	0	0	0
'11'	11	460	496	11.667	2.427	36	9.24	0	15.4	27.8647	0.824446	8	0.802502	1.8663	0	0	0	0	0	0	0	0		25.2739		37.2776
'12'	1	16	48	25.669	5.676	32	19.993	0	37.4869	39.7421	0.923831	7	0.912949	2.38274	6	1.07143	5	0.806452	216	180	28.2609	0.461205
'12'	2	48	72	5.676	17.601	24	11.925	29.8125	0	6.83549	0.949416	5	0.9393	1.16923	0	0	0	0	0	0	0	0
'12'	3	72	116	17.601	6.263	44	11.338	0	15.4609	37.0916	0.850643	10	0.835708	1.92592	0	0	0	0	0	0	0	0
'12'	4	116	140	6.263	13.744	24	7.481	18.7025	0	2.49149	0.952384	5	0.942861	0.705902	0	0	0	0	0	0	0	0
'12'	6	168	228	4.922	29.59	60	24.668	24.668	0	38.6643	0.951341	14	0.947866	1.66185	0	0	0	0	0	0	0	0
'12'	7	228	284	29.59	5.588	56	24.002	0	25.7164	40.9215	0.945068	13	0.940843	1.77421	0	0	0	0	0	0	0	0
'12'	8	284	312	5.588	13.924	28	8.336	17.8629	0	4.41604	0.946761	6	0.937888	0.857908	0	0	0	0	0	0	0	0
'12'	10	324	348	14.579	24.989	24	10.41	26.025	0	13.1798	0.897869	5	0.877443	1.62357	0	0	0	0	0	0	0	0
'12'	13	392	428	27.295	6.872	36	20.423	0	34.0383	31.6578	0.928788	8	0.919887	1.98928	0	0	0	0	0	0	0	0
'12'	14	428	484	6.872	39.001	56	32.129	34.4239	0	124.282	0.904696	13	0.897364	3.09195	0	0	0	0	0	0	0	0
'12'	18	556	568	30.083	18.151	12	11.932	0	59.66	0.211521	0.99742	2	0.99613	0.325208	0	0	0	0	0	0	0	0		25.2491		34.4725
'13'	5	48	124	1.667	20.136	76	18.469	14.5808	0	85.0859	0.874215	18	0.867227	2.17417	7	1.38158	5	0.773196	244	160	26.2774	0.360059
'13'	7	124	152	20.136	26.352	28	6.216	13.32	0	12.0517	0.849324	6	0.824211	1.41726	0	0	0	0	0	0	0	0
'13'	8	152	216	26.352	4.269	64	22.083	0	20.7028	40.6592	0.95809	15	0.955297	1.64639	0	0	0	0	0	0	0	0
'13'	10	236	248	13.153	5.548	12	7.605	0	38.025	6.65685	0.864774	2	0.797161	1.8244	0	0	0	0	0	0	0	0
'13'	11	248	264	5.548	16.58	16	11.032	41.37	0	4.08056	0.949016	3	0.932021	1.16627	0	0	0	0	0	0	0	0
'13'	12	264	312	16.58	0	48	16.58	0	20.725	20.7449	0.933801	11	0.927783	1.37328	0	0	0	0	0	0	0	0
'13'	13	312	336	0	12.875	24	12.875	32.1875	0	13.6486	0.905278	5	0.886333	1.65219	0	0	0	0	0	0	0	0
'13'	18	448	468	18.151	7.696	20	10.455	0	31.365	11.8693	0.836243	4	0.795304	1.72259	0	0	0	0	0	0	0	0
'13'	20	468	480	7.696	13.482	12	5.786	28.93	0	1.39094	0.917413	2	0.876119	0.833947	0	0	0	0	0	0	0	0
'13'	22	492	508	20.248	7	16	13.248	0	49.68	11.4076	0.906798	3	0.875731	1.95001	0	0	0	0	0	0	0	0
'13'	23	508	584	7	24.723	76	17.723	13.9918	0	81.01	0.931835	18	0.928048	2.12145	0	0	0	0	0	0	0	0
'13'	24	584	596	24.723	28.115	12	3.392	16.96	0	0.915726	0.898129	2	0.847194	0.676656	0	0	0	0	0	0	0	0		23.0486		32.0996
'14'	1	16	44	4.069	16.72	28	12.651	27.1093	0	13.4344	0.924908	6	0.912393	1.49635	6	1.25	4	0.530973	284	120	29.3706	0.360644
'14'	11	156	180	12.238	17.789	24	5.551	13.8775	0	2.85145	0.907515	5	0.889018	0.755175	0	0	0	0	0	0	0	0
'14'	12	180	220	17.789	4.679	40	13.11	0	19.665	59.4111	0.854646	9	0.838495	2.56929	0	0	0	0	0	0	0	0
'14'	15	220	276	4.679	16.028	56	11.349	12.1596	0	40.1551	0.862344	13	0.851755	1.75751	0	0	0	0	0	0	0	0
'14'	16	276	284	16.028	12.758	8	3.27	0	24.525	0.156817	0.971505	1	0.94301	0.396001	0	0	0	0	0	0	0	0
'14'	18	304	328	17.499	5.588	24	11.911	0	29.7775	12.9724	0.911366	5	0.893639	1.61074	0	0	0	0	0	0	0	0
'14'	19	328	424	5.588	26.401	96	20.813	13.0081	0	76.824	0.933185	23	0.93028	1.82761	0	0	0	0	0	0	0	0
'14'	21	424	472	26.401	38.681	48	12.28	15.35	0	44.4661	0.838631	11	0.823961	2.01057	0	0	0	0	0	0	0	0
'14'	24	508	556	47.893	5.077	48	42.816	0	53.52	74.4871	0.97386	11	0.971483	2.60222	0	0	0	0	0	0	0	0
'14'	25	556	588	5.077	17.026	32	11.949	22.4044	0	21.2925	0.830941	7	0.80679	1.74407	0	0	0	0	0	0	0	0		17.3182		31.8719
'15'	4	72	108	17.867	32.202	36	14.335	23.8917	0	30.4462	0.89406	8	0.880817	1.95084	5	0.974026	5	0.797872	212	144	31.5385	0.445447
'15'	5	108	148	32.202	3.887	40	28.315	0	42.4725	84.6067	0.940956	9	0.934396	3.06606	0	0	0	0	0	0	0	0
'15'	7	188	204	12	0	16	12	0	45	11.172	0.903203	3	0.870938	1.92977	0	0	0	0	0	0	0	0
'15'	8	204	236	0	12.684	32	12.684	23.7825	0	33.7108	0.839514	7	0.816587	2.1945	0	0	0	0	0	0	0	0
'15'	10	236	272	12.684	26.283	36	13.599	22.665	0	15.5655	0.906731	8	0.895073	1.39488	0	0	0	0	0	0	0	0
'15'	13	272	324	26.283	3	52	23.283	0	26.865	68.2619	0.929268	12	0.923373	2.38506	0	0	0	0	0	0	0	0
'15'	20	404	444	3.887	17.464	40	13.577	20.3655	0	39.9973	0.885269	9	0.872522	2.10811	0	0	0	0	0	0	0	0
'15'	21	444	460	17.464	7.667	16	9.797	0	36.7388	11.5083	0.869362	3	0.825816	1.9586	0	0	0	0	0	0	0	0
'15'	23	504	524	13.038	0	20	13.038	0	39.114	3.92443	0.968742	4	0.960927	0.990509	0	0	0	0	0	0	0	0
'15'	24	524	592	0	17.951	68	17.951	15.8391	0	45.4752	0.936433	16	0.93246	1.68588	0	0	0	0	0	0	0	0		21.3088		38.038
'16'	2	4	44	15.808	4.472	40	11.336	0	17.004	59.827	0.829032	9	0.810036	2.57826	5	0.824176	6	0.978261	192	188	31.6547	0.412755
'16'	3	44	80	4.472	35.201	36	30.729	51.215	0	97.9351	0.882677	8	0.868011	3.49884	0	0	0	0	0	0	0	0
'16'	6	80	88	35.201	24.205	8	10.996	0	82.47	5.996	0.909769	1	0.819539	2.44867	0	0	0	0	0	0	0	0
'16'	10	104	148	27.101	5.548	44	21.553	0	29.3905	63.0101	0.905333	10	0.895866	2.51018	0	0	0	0	0	0	0	0
'16'	14	172	192	13.507	0	20	13.507	0	40.521	15.0277	0.917452	4	0.896815	1.93828	0	0	0	0	0	0	0	0
'16'	15	192	216	0	13.671	24	13.671	34.1775	0	4.3648	0.971915	5	0.966298	0.934323	0	0	0	0	0	0	0	0
'16'	19	272	344	0	20.939	72	20.939	17.4492	0	68.0463	0.917315	17	0.912452	2.00068	0	0	0	0	0	0	0	0
'16'	20	344	384	20.939	9.195	40	11.744	0	17.616	26.9451	0.860702	9	0.845225	1.73029	0	0	0	0	0	0	0	0
'16'	22	384	392	9.195	10.339	8	1.144	8.58	0	0.00666667	0.989915	1	0.97983	0.0816497	0	0	0	0	0	0	0	0
'16'	28	472	508	14.43	3.682	36	10.748	0	17.9133	12.0947	0.881076	8	0.86621	1.22957	0	0	0	0	0	0	0	0
'16'	29	508	560	3.682	14.162	52	10.48	12.0923	0	22.4772	0.853748	12	0.84156	1.36861	0	0	0	0	0	0	0	0		24.7028		34.1525
'17'	3	32	76	37.353	16.72	44	20.633	0	28.1359	49.7395	0.938969	10	0.932866	2.23024	2	0.348837	5	0.872093	148	148	39.8374	0.475601
'17'	4	76	200	16.72	44.817	124	28.097	13.5953	0	101.19	0.953759	30	0.952218	1.83657	0	0	0	0	0	0	0	0
'17'	5	200	244	44.817	10.541	44	34.276	0	46.74	71.1912	0.949996	10	0.944995	2.66817	0	0	0	0	0	0	0	0
'17'	8	280	304	9.481	30.481	24	21	52.5	0	39.2481	0.836857	5	0.804229	2.80172	0	0	0	0	0	0	0	0
'17'	10	304	316	30.481	17.263	12	13.218	0	66.09	8.41316	0.903731	2	0.855597	2.05099	0	0	0	0	0	0	0	0
'17'	13	352	368	30.002	23.447	16	6.555	0	24.5813	2.96042	0.908484	3	0.877979	0.993381	0	0	0	0	0	0	0	0
'17'	23	492	524	28.57	11.571	32	16.999	0	31.8731	32.9436	0.853705	7	0.832806	2.16938	0	0	0	0	0	0	0	0		33.0477		39.4841
'18'	1	60	104	25.062	6.368	44	18.694	0	25.4918	45.3724	0.927678	10	0.920445	2.13008	6	1.18421	5	0.892857	208	176	25	0.365602
'18'	2	104	124	6.368	12.684	20	6.316	18.948	0	3.4477	0.892322	4	0.865403	0.928399	0	0	0	0	0	0	0	0
'18'	3	124	160	12.684	5.175	36	7.509	0	12.515	12.4558	0.834375	8	0.813672	1.24779	0	0	0	0	0	0	0	0
'18'	4	160	196	5.175	13.536	36	8.361	13.935	0	18.824	0.843485	8	0.82392	1.53395	0	0	0	0	0	0	0	0
'18'	6	196	236	13.536	26.569	40	13.033	19.5495	0	32.6026	0.871496	9	0.857218	1.90329	0	0	0	0	0	0	0	0
'18'	7	236	260	26.569	6.083	24	20.486	0	51.215	3.91741	0.988497	5	0.986197	0.885145	0	0	0	0	0	0	0	0
'18'	8	260	308	6.083	18.649	48	12.566	15.7075	0	34.3764	0.902616	11	0.893763	1.7678	0	0	0	0	0	0	0	0
'18'	12	316	372	14.644	30.017	56	15.373	16.4711	0	15.9474	0.957515	13	0.954247	1.10758	0	0	0	0	0	0	0	0
'18'	13	372	412	30.017	3.606	40	26.411	0	39.6165	30.5977	0.970588	9	0.96732	1.84384	0	0	0	0	0	0	0	0
'18'	22	532	540	0	5.821	8	5.821	43.6575	0	4.21849	0.800643	1	0.601286	2.0539	0	0	0	0	0	0	0	0
'18'	23	540	572	5.821	0	32	5.821	0	10.9144	4.27543	0.922198	7	0.911084	0.781521	0	0	0	0	0	0	0	0		21.3781		27.9505
'19'	1	24	76	0	15.892	52	15.892	18.3369	0	41.0464	0.927835	12	0.921821	1.84947	6	1.69811	7	1.34615	268	168	9.16667	0.325911
'19'	2	76	92	15.892	11.785	16	4.107	0	15.4012	1.42824	0.90279	3	0.870387	0.689985	0	0	0	0	0	0	0	0
'19'	3	92	132	11.785	16.445	40	4.66	6.99	0	5.06706	0.832075	9	0.813416	0.750338	0	0	0	0	0	0	0	0
'19'	4	132	192	16.445	4.014	60	12.431	0	12.431	55.6454	0.852869	14	0.84236	1.99366	0	0	0	0	0	0	0	0
'19'	5	192	212	4.014	7.674	20	3.66	10.98	0	2.17967	0.844492	4	0.805615	0.738186	0	0	0	0	0	0	0	0
'19'	7	212	284	7.674	25.979	72	18.305	15.2542	0	78.8892	0.920035	17	0.915331	2.15419	0	0	0	0	0	0	0	0
'19'	8	284	316	25.979	6.936	32	19.043	0	35.7056	18.9689	0.959683	7	0.953924	1.64616	0	0	0	0	0	0	0	0
'19'	9	316	360	6.936	16	44	9.064	12.36	0	35.0688	0.849436	10	0.834379	1.87267	0	0	0	0	0	0	0	0
'19'	10	360	368	16	15.033	8	0.967	0	7.2525	0.0598002	0.886601	1	0.773203	0.244541	0	0	0	0	0	0	0	0
'19'	12	368	376	15.033	7.333	8	7.7	0	57.75	0.00256267	0.999914	1	0.999827	0.0506228	0	0	0	0	0	0	0	0
'19'	16	400	408	20.003	13.499	8	6.504	0	48.78	3.74776	0.84948	1	0.69896	1.93591	0	0	0	0	0	0	0	0
'19'	20	428	464	30.046	0	36	30.046	0	50.0767	103.808	0.89143	8	0.877858	3.60221	0	0	0	0	0	0	0	0
'19'	21	464	504	0	9.718	40	9.718	14.577	0	25.5842	0.84587	9	0.828745	1.68603	0	0	0	0	0	0	0	0		12.0322		32.4853

## Sheet: V410I
yJM4014																					yJM4014
Imaged on 08.20.19																					Imaged on 09.17.19
Image #003 cell#1			Image #004 cell#1			Image #004 cell#2			Image #004 cell#3			Image #007 cell#1			Image #007 cell#2			Image #008 cell#1			Image #0 cell#1			Image #001 cell#1			Image #001 cell#2			Image #003 cell#1			Image #004 cell#1			Image #005 cell#1			Image #005 cell#2			Image #008 cell#1			Image #008 cell#2			Image #010 cell#1
Time (s)	Length	Length (um)	Time (s)	Length	Length (um)	Time (s)	Length	Length (um)	Time (s)	Length	Length (um)	Time (s)	Length	Length (um)	Time (s)	Length	Length (um)	Time (s)	Length	Length (um)	Time (s)	Length	Length (um)	Time (s)	Length	Length (um)	Time (s)	Length	Length (um)	Time (s)	Length	Length (um)	Time (s)	Length	Length (um)	Time (s)	Length	Length (um)	Time (s)	Length	Length (um)	Time (s)	Length	Length (um)	Time (s)	Length	Length (um)	Time (s)	Length
0	21.587	1.15123	0	12.369	0.659639	0	22.94	1.22339	0	24.166	1.28877	0	6.403	0.341472	0	25	1.33325	0	11.068	0.590256	0	21.593	1.15155	0	9.823	0.523861	0	2.5	0.133325	0	17.586	0.937861	0	7	0.37331	0	35.391	1.8874	0	5.696	0.303768	0	21.357	1.13897	0	11.609	0.619108	0	10.462
4	20.224	1.07855	4	11.236	0.599216	4	21.523	1.14782	4	25.298	1.34914	4	5.657	0.301688	4	25.676	1.3693	4	8.322	0.443812	4	23.335	1.24446	4	8.515	0.454105	4	2.5	0.133325	4	18.868	1.00623	4	5	0.26665	4	36.644	1.95422	4	0	0	4	22.254	1.18681	4	11.101	0.592016	4	13.132
8	18.007	0.960313	8	7.433	0.396402	8	23.505	1.25352	8	26.405	1.40818	8	4.95	0.263984	8	28.284	1.50839	8	9.192	0.490209	8	25.164	1.342	8	8.016	0.427493	8	7.071	0.377096	8	22.023	1.17449	8	3.536	0.188575	8	38.737	2.06584	8	2.603	0.138818	8	22.886	1.22051	8	12.53	0.668225	8	13.187
12	20.555	1.0962	12	5.148	0.274543	12	21.101	1.12532	12	27.987	1.49255	12	4.031	0.214973	12	29.732	1.58561	12	8.322	0.443812	12	26.856	1.43223	12	7.018	0.37427	12	8.602	0.458745	12	21.783	1.16169	12	4.123	0.21988	12	38.438	2.0499	12	2.828	0.150817	12	27.008	1.44034	12	14.621	0.779738	12	14.252
16	27.295	1.45564	16	7.159	0.381789	16	18.901	1.00799	16	22.677	1.20936	16	4.717	0.251558	16	29	1.54657	16	9.657	0.515008	16	26.387	1.40722	16	10	0.5333	16	11.068	0.590256	16	27.83	1.48417	16	4.743	0.252944	16	36.535	1.94841	16	2.108	0.11242	16	27.909	1.48839	16	16.707	0.890984	16	14.907
20	15.133	0.807043	20	11.102	0.59207	20	19.294	1.02895	20	12.369	0.659639	20	5.701	0.304034	20	20.797	1.1091	20	11.673	0.622521	20	26.505	1.41351	20	19.039	1.01535	20	11.885	0.633827	20	27.735	1.47911	20	4.743	0.252944	20	28.761	1.53382	20	0	0	20	30.971	1.65168	20	18.812	1.00324	20	13.569
24	14.577	0.777391	24	10.124	0.539913	24	18.028	0.961433	24	15	0.79995	24	8.944	0.476984	24	19.647	1.04777	24	9.708	0.517728	24	20.125	1.07327	24	19.5	1.03994	24	9.487	0.505942	24	26.856	1.43223	24	6.325	0.337312	24	24.037	1.28189	24	0	0	24	27.346	1.45836	24	18.649	0.994551	24	16.347
28	14.23	0.758886	28	12.176	0.649346	28	13.946	0.74374	28	12.59	0.671425	28	8.062	0.429946	28	14	0.74662	28	12.659	0.675104	28	13.038	0.695317	28	18.822	1.00378	28	3	0.15999	28	29.296	1.56236	28	6.185	0.329846	28	18.333	0.977699	28	7.126	0.38003	28	28.351	1.51196	28	19.396	1.03439	28	15.836
32	16.978	0.905437	32	10	0.5333	32	7.5	0.399975	32	10.548	0.562525	32	9.055	0.482903	32	8.016	0.427493	32	10.5	0.559965	32	14.036	0.74854	32	17.734	0.945754	32	0	0	32	21.954	1.17081	32	8.016	0.427493	32	13.487	0.719262	32	8.769	0.467651	32	28.715	1.53137	32	17.92	0.955674	32	13.536
36	16.553	0.882771	36	5.408	0.288409	36	6.083	0.324406	36	8.139	0.434053	36	14.142	0.754193	36	7	0.37331	36	12.042	0.6422	36	2.915	0.155457	36	11.673	0.622521	36	0	0	36	17.923	0.955834	36	9.552	0.509408	36	16.028	0.854773	36	10.713	0.571324	36	27.729	1.47879	36	16.72	0.891678	36	11.338
40	10.794	0.575644	40	5.099	0.27193	40	7	0.37331	40	2.062	0.109966	40	15.572	0.830455	40	3.5	0.186655	40	9.394	0.500982	40	5.148	0.274543	40	14.534	0.775098	40	0	0	40	8.732	0.465678	40	9.487	0.505942	40	14.621	0.779738	40	8.393	0.447599	40	32.17	1.71563	40	12.454	0.664172	40	8.975
44	14.318	0.763579	44	0	0	44	6.801	0.362697	44	0	0	44	16.711	0.891198	44	2.55	0.135991	44	4.528	0.241478	44	8.382	0.447012	44	10.794	0.575644	44	0	0	44	8.746	0.466424	44	10.92	0.582364	44	13.679	0.729501	44	4.738	0.252678	44	29.758	1.58699	44	6.864	0.366057	44	3.801
48	10.308	0.549726	48	0	0	48	11.102	0.59207	48	0	0	48	15.116	0.806136	48	9.055	0.482903	48	4.5	0.239985	48	9.618	0.512928	48	10	0.5333	48	6.519	0.347658	48	9.899	0.527914	48	13.509	0.720435	48	15.041	0.802137	48	2.687	0.143298	48	33.706	1.79754	48	1.333	0.0710889	48	7
52	8.246	0.439759	52	0	0	52	15.042	0.80219	52	0	0	52	15.914	0.848694	52	10.77	0.574364	52	5.523	0.294542	52	13.463	0.717982	52	9.394	0.500982	52	7.566	0.403495	52	12.42	0.662359	52	10.124	0.539913	52	20.591	1.09812	52	1.795	0.0957274	52	35.822	1.91039	52	0	0	52	4.667
56	7.649	0.407921	56	0	0	56	17.393	0.927569	56	0	0	56	13.73	0.732221	56	12.619	0.672971	56	5.099	0.27193	56	15	0.79995	56	12.816	0.683477	56	2.55	0.135991	56	15.953	0.850773	56	8.246	0.439759	56	15.723	0.838508	56	1.944	0.103674	56	45.02	2.40092	56	2.603	0.138818	56	6.708
60	8	0.42664	60	0	0	60	18	0.95994	60	3.202	0.170763	60	9.301	0.496022	60	16.101	0.858666	60	5.701	0.304034	60	16.031	0.854933	60	12.093	0.64492	60	0	0	60	15.882	0.846987	60	6.325	0.337312	60	17.941	0.956794	60	4.069	0.217	60	51.343	2.73812	60	2.867	0.152897	60	9.481
64	9.055	0.482903	64	3.808	0.203081	64	16.492	0.879518	64	4.924	0.262597	64	5.657	0.301688	64	19.558	1.04303	64	4.301	0.229372	64	15.7	0.837281	64	10.548	0.562525	64	14.142	0.754193	64	16.978	0.905437	64	5.5	0.293315	64	17.401	0.927995	64	9.911	0.528554	64	49.005	2.61344	64	6.872	0.366484	64	15.293
68	11.543	0.615588	68	5.22	0.278383	68	17.103	0.912103	68	6.364	0.339392	68	3.041	0.162177	68	19.925	1.0626	68	9.22	0.491703	68	16.771	0.894397	68	12.748	0.679851	68	8.382	0.447012	68	17.847	0.951781	68	6.5	0.346645	68	17.591	0.938128	68	10.672	0.569138	68	54.35	2.89849	68	8.498	0.453198	68	13.671
72	9.513	0.507328	72	11.314	0.603376	72	14.577	0.777391	72	5	0.26665	72	4.272	0.227826	72	22.655	1.20819	72	8.631	0.460291	72	19.32	1.03034	72	9.552	0.509408	72	13.647	0.727795	72	20.797	1.1091	72	9.22	0.491703	72	18.196	0.970393	72	9.434	0.503115	72	56.382	3.00685	72	10.006	0.53362	72	13.283
76	9.192	0.490209	76	11.927	0.636067	76	16.031	0.854933	76	7.5	0.399975	76	9.055	0.482903	76	20.248	1.07983	76	8.515	0.454105	76	23.087	1.23123	76	8.5	0.453305	76	16.985	0.90581	76	23.479	1.25214	76	10.966	0.584817	76	18.04	0.962073	76	10.355	0.552232	76	55.065	2.93662	76	16.087	0.85792	76	8.975
80	7.81	0.416507	80	8.602	0.458745	80	23.049	1.2292	80	5.701	0.304034	80	7.616	0.406161	80	20.156	1.07492	80	9.192	0.490209	80	22.472	1.19843	80	3.905	0.208254	80	15.811	0.843201	80	18.446	0.983725	80	11.927	0.636067	80	20.069	1.07028	80	10.16	0.541833	80	56.395	3.00755	80	10.296	0.549086	80	20.939
84	9.657	0.515008	84	6.801	0.362697	84	21.506	1.14691	84	6.946	0.37043	84	6.519	0.347658	84	23.119	1.23294	84	8.631	0.460291	84	22.322	1.19043	84	1.414	0.0754086	84	16.643	0.887571	84	22.5	1.19993	84	12.042	0.6422	84	26.183	1.39634	84	11.552	0.616068	84	47.335	2.52438	84	14.896	0.794404	84	22.903
88	13	0.69329	88	5.701	0.304034	88	21.006	1.12025	88	4.95	0.263984	88	7.106	0.378963	88	24.885	1.32712	88	6.727	0.358751	88	24.622	1.31309	88	1.581	0.0843147	88	10.977	0.585403	88	26.005	1.38685	88	10	0.5333	88	29.282	1.56161	88	12.737	0.679264	88	38.989	2.07928	88	14.644	0.780965	88	15.624
92	7.762	0.413947	92	4.61	0.245851	92	21.915	1.16873	92	5.408	0.288409	92	5.657	0.301688	92	22.277	1.18803	92	4.301	0.229372	92	23.838	1.27128	92	4.743	0.252944	92	2.5	0.133325	92	31.623	1.68645	92	10.63	0.566898	92	29.612	1.57921	92	13.454	0.717502	92	28.669	1.52892	92	20.431	1.08959	92	12.867
96	0	0	96	3.536	0.188575	96	11.662	0.621934	96	3.64	0.194121	96	6.5	0.346645	96	16.621	0.886398	96	5	0.26665	96	14.142	0.754193	96	10.124	0.539913	96	1.118	0.0596229	96	21.932	1.16963	96	10.735	0.572498	96	31.758	1.69365	96	9.69	0.516768	96	15.667	0.835521	96	20.431	1.08959	96	9.545
100	0	0	100	10.112	0.539273	100	10.595	0.565031	100	6.708	0.357738	100	8.746	0.466424	100	20.887	1.1139	100	3.905	0.208254	100	7.071	0.377096	100	7.106	0.378963	100	0	0	100	22.456	1.19758	100	13.416	0.715475	100	33.864	1.80597	100	10.138	0.54066	100	17.333	0.924369	100	25.966	1.38477	100	10.269
104	4.743	0.252944	104	10	0.5333	104	8.016	0.427493	104	7.649	0.407921	104	13.647	0.727795	104	26.163	1.39527	104	4.272	0.227826	104	5	0.26665	104	14.866	0.792804	104	6.5	0.346645	104	18.125	0.966606	104	8.062	0.429946	104	37.029	1.97476	104	9.894	0.527647	104	22.003	1.17342	104	25.932	1.38295	104	10.75
108	5.852	0.312087	108	13.865	0.73942	108	7.018	0.37427	108	13.463	0.717982	108	17.103	0.912103	108	29.732	1.58561	108	4.243	0.226279	108	8.944	0.476984	108	18.337	0.977912	108	11.011	0.587217	108	22.638	1.20728	108	4	0.21332	108	30.201	1.61062	108	8.975	0.478637	108	26.002	1.38669	108	29.486	1.57249	108	9.718
112	5.59	0.298115	112	14.765	0.787417	112	4.924	0.262597	112	14.431	0.769605	112	16.971	0.905063	112	32.596	1.73834	112	6.801	0.362697	112	8.201	0.437359	112	15.24	0.812749	112	4	0.21332	112	35.924	1.91583	112	2.55	0.135991	112	35.766	1.9074	112	5.667	0.302221	112	28.365	1.51271	112	33.682	1.79626	112	8.439
116	4.301	0.229372	116	9.708	0.517728	116	5.59	0.298115	116	14.807	0.789657	116	19.455	1.03754	116	30.042	1.60214	116	9.014	0.480717	116	11	0.58663	116	14.009	0.7471	116	7.517	0.400882	116	31.504	1.68011	116	3.64	0.194121	116	40.267	2.14744	116	7.775	0.414641	116	29.652	1.58134	116	33.275	1.77456	116	9.481
120	8.139	0.434053	120	7.071	0.377096	120	3	0.15999	120	19.729	1.05215	120	17.692	0.943514	120	30.516	1.62742	120	13.038	0.695317	120	11.705	0.624228	120	5.831	0.310967	120	4.031	0.214973	120	26.387	1.40722	120	3	0.15999	120	39.951	2.13059	120	10.154	0.541513	120	32.338	1.72459	120	32.366	1.72608	120	6.289
124	5.315	0.283449	124	6.403	0.341472	124	9.124	0.486583	124	19.32	1.03034	124	20.863	1.11262	124	30.647	1.6344	124	14.213	0.757979	124	14.009	0.7471	124	2.915	0.155457	124	4.301	0.229372	124	13.829	0.737501	124	4.924	0.262597	124	35.146	1.87434	124	6.009	0.32046	124	32.694	1.74357	124	34.681	1.84954	124	6.227
128	10.062	0.536606	128	4.031	0.214973	128	10.595	0.565031	128	15.532	0.828322	128	23.2	1.23726	128	37.366	1.99273	128	11.705	0.624228	128	17.007	0.906983	128	4	0.21332	128	2.5	0.133325	128	11.853	0.63212	128	7	0.37331	128	31.863	1.69925	128	10.028	0.534793	128	37.382	1.99358	128	35.54	1.89535	128	7.18
132	10.012	0.53394	132	2	0.10666	132	14.714	0.784698	132	12.5	0.666625	132	20.887	1.1139	132	32.5	1.73323	132	16.286	0.868532	132	18.439	0.983352	132	8.016	0.427493	132	0	0	132	14.773	0.787844	132	8.5	0.453305	132	26.907	1.43495	132	9.911	0.528554	132	39.735	2.11907	132	37.216	1.98473	132	7.674
136	11.18	0.596229	136	0	0	136	15.532	0.828322	136	9.708	0.517728	136	25.303	1.34941	136	36.705	1.95748	136	17.088	0.911303	136	17.335	0.924476	136	8.602	0.458745	136	0	0	136	8.86	0.472504	136	8.944	0.476984	136	23.405	1.24819	136	6.037	0.321953	136	40.672	2.16904	136	31.415	1.67536	136	8.333
140	11.18	0.596229	140	0	0	140	10.112	0.539273	140	8	0.42664	140	25.544	1.36226	140	34.946	1.86367	140	18.5	0.986605	140	22.051	1.17598	140	11	0.58663	140	6.576	0.350698	140	11.18	0.596229	140	12.748	0.679851	140	15.902	0.848054	140	8.117	0.43288	140	41.679	2.22274	140	29.981	1.59889	140	11.141
144	11.885	0.633827	144	0	0	144	10.7	0.570631	144	5.099	0.27193	144	24.083	1.28435	144	38.279	2.04142	144	20.555	1.0962	144	20.591	1.09812	144	15.042	0.80219	144	10.198	0.543859	144	13.463	0.717982	144	15.305	0.816216	144	12.019	0.640973	144	7.032	0.375017	144	39.78	2.12147	144	26.687	1.42322	144	16.55
148	15.572	0.830455	148	2.062	0.109966	148	7.28	0.388242	148	5.701	0.304034	148	24.602	1.31202	148	41.183	2.19629	148	27.005	1.44018	148	24.187	1.28989	148	17.335	0.924476	148	5.5	0.293315	148	16.008	0.853707	148	16.263	0.867306	148	9.262	0.493942	148	5.706	0.304301	148	37.102	1.97865	148	22.669	1.20894	148	14.735
152	13.509	0.720435	152	0	0	152	10.512	0.560605	152	13.829	0.737501	152	17.889	0.95402	152	42.19	2.24999	152	28	1.49324	152	27.281	1.4549	152	11.336	0.604549	152	12.855	0.685557	152	13.463	0.717982	152	18.439	0.983352	152	2.108	0.11242	152	2.828	0.150817	152	26.675	1.42258	152	17.477	0.932048	152	10.006
156	14.422	0.769125	156	0	0	156	12.379	0.660172	156	11	0.58663	156	13.657	0.728328	156	45.486	2.42577	156	29.262	1.56054	156	25	1.33325	156	10.308	0.549726	156	6.727	0.358751	156	22.638	1.20728	156	17.678	0.942768	156	0	0	156	3.162	0.168629	156	25.831	1.37757	156	10.382	0.553672	156	9.068
160	11.715	0.624761	160	6	0.31998	160	12.728	0.678784	160	16.279	0.868159	160	14.08	0.750886	160	45.621	2.43297	160	26.575	1.41724	160	26.5	1.41325	160	16.763	0.893971	160	3.041	0.162177	160	25.715	1.37138	160	16.401	0.874665	160	0	0	160	7.608	0.405735	160	19.394	1.03428	160	10.138	0.54066	160	9.69
164	7.071	0.377096	164	3.808	0.203081	164	20.427	1.08937	164	19.526	1.04132	164	12.5	0.666625	164	45.61	2.43238	164	18.069	0.96362	164	30.733	1.63899	164	17.847	0.951781	164	5.523	0.294542	164	24.418	1.30221	164	22.299	1.18921	164	1.667	0.0889011	164	6.936	0.369897	164	12.494	0.666305	164	12.019	0.640973	164	6.6
168	6	0.31998	168	0	0	168	25.11	1.33912	168	19.164	1.02202	168	15.435	0.823149	168	44.23	2.35879	168	17.088	0.911303	168	28.784	1.53505	168	16.325	0.870612	168	2	0.10666	168	28.43	1.51617	168	22.277	1.18803	168	0	0	168	8.75	0.466638	168	11.101	0.592016	168	8.769	0.467651	168	12.684
172	6.021	0.3211	172	6.5	0.346645	172	17.493	0.932902	172	16.978	0.905437	172	17.868	0.9529	172	46.739	2.49259	172	21.36	1.13913	172	31.305	1.6695	172	19.78	1.05487	172	6.5	0.346645	172	27.722	1.47841	172	21.932	1.16963	172	7.341	0.391496	172	11.557	0.616335	172	6.472	0.345152	172	10.138	0.54066	172	6.472
176	7.649	0.407921	176	6.103	0.325473	176	14.089	0.751366	176	11.705	0.624228	176	9.925	0.5293	176	41.382	2.2069	176	21.03	1.12153	176	34.928	1.86271	176	15.953	0.850773	176	5.5	0.293315	176	29.908	1.59499	176	20.616	1.09945	176	8.75	0.466638	176	11.402	0.608069	176	2.134	0.113806	176	8.857	0.472344	176	3.3
180	11.5	0.613295	180	1.5	0.079995	180	16.771	0.894397	180	16.194	0.863626	180	8.485	0.452505	180	38.939	2.07662	180	21.541	1.14878	180	38.471	2.05166	180	11.045	0.58903	180	7.5	0.399975	180	30.48	1.6255	180	22.897	1.2211	180	8.75	0.466638	180	14.716	0.784804	180	1.667	0.0889011	180	7.696	0.410428	180	4.333
184	6.964	0.37139	184	5.385	0.287182	184	12.042	0.6422	184	20.224	1.07855	184	6.946	0.37043	184	36.459	1.94436	184	21.915	1.16873	184	41.382	2.2069	184	6.042	0.32222	184	12.042	0.6422	184	29.908	1.59499	184	24.13	1.28685	184	7.379	0.393522	184	13.744	0.732968	184	0	0	184	7.491	0.399495	184	2.404
188	8.062	0.429946	188	9.014	0.480717	188	11.5	0.613295	188	16.56	0.883145	188	6.727	0.358751	188	33.589	1.7913	188	23.259	1.2404	188	44.096	2.35164	188	6.576	0.350698	188	6.576	0.350698	188	26.005	1.38685	188	22.804	1.21614	188	12.333	0.657719	188	16.786	0.895197	188	7.601	0.405361	188	5	0.26665	188	3.543
192	12.104	0.645506	192	8.544	0.455652	192	6.5	0.346645	192	15	0.79995	192	9.618	0.512928	192	27.987	1.49255	192	23.033	1.22835	192	35.556	1.8962	192	6.5	0.346645	192	2	0.10666	192	28.601	1.52529	192	24.759	1.3204	192	14.333	0.764379	192	13.683	0.729714	192	11.785	0.628494	192	8.393	0.447599	192	3.073
196	10.062	0.536606	196	7.632	0.407015	196	7	0.37331	196	18.822	1.00378	196	11.18	0.596229	196	25.87	1.37965	196	21.783	1.16169	196	31.988	1.70592	196	7.018	0.37427	196	0	0	196	23.114	1.23267	196	26.201	1.3973	196	15.524	0.827895	196	13.454	0.717502	196	13.187	0.703263	196	9.718	0.518261	196	1.944
200	11.236	0.599216	200	11.281	0.601616	200	9.849	0.525247	200	17.614	0.939355	200	10.607	0.565671	200	23.049	1.2292	200	18.722	0.998444	200	25.179	1.3428	200	8.631	0.460291	200	0	0	200	22.638	1.20728	200	25.933	1.38301	200	16.67	0.889011	200	9.989	0.532713	200	14.181	0.756273	200	12.494	0.666305	200	4.955
204	12.021	0.64108	204	12.971	0.691743	204	18.439	0.983352	204	19.026	1.01466	204	10.012	0.53394	204	23.345	1.24499	204	21.783	1.16169	204	19.235	1.0258	204	8.5	0.453305	204	4.61	0.245851	204	25.125	1.33992	204	26.005	1.38685	204	16.125	0.859946	204	4.807	0.256357	204	13.78	0.734887	204	13.683	0.729714	204	2.687
208	15.652	0.834721	208	15	0.79995	208	16.621	0.886398	208	15.182	0.809656	208	11.281	0.601616	208	23.691	1.26344	208	18.507	0.986978	208	16.101	0.858666	208	7.826	0.417361	208	4.528	0.241478	208	24.083	1.28435	208	29.698	1.58379	208	19.333	1.03103	208	2.687	0.143298	208	11.338	0.604656	208	14.67	0.782351	208	6.872
212	13.416	0.715475	212	12.021	0.64108	212	14.036	0.74854	212	10.595	0.565031	212	10.966	0.584817	212	23.712	1.26456	212	19.105	1.01887	212	11.5	0.613295	212	10.296	0.549086	212	5.701	0.304034	212	15.62	0.833015	212	28.901	1.54129	212	16.333	0.871039	212	4.534	0.241798	212	16.697	0.890451	212	18.114	0.96602	212	8.724
216	13.21	0.704489	216	9.605	0.512235	216	17	0.90661	216	7.433	0.396402	216	5.701	0.304034	216	26.196	1.39703	216	13.73	0.732221	216	13.537	0.721928	216	11.597	0.618468	216	5.025	0.267983	216	16.643	0.887571	216	28.657	1.52828	216	16.75	0.893278	216	2.981	0.158977	216	17.695	0.943674	216	18.049	0.962553	216	11.411
220	10.198	0.543859	220	4.528	0.241478	220	18.927	1.00938	220	5.099	0.27193	220	5.5	0.293315	220	29.155	1.55484	220	15.7	0.837281	220	7.906	0.421627	220	14	0.74662	220	4.243	0.226279	220	13.657	0.728328	220	29.833	1.59099	220	21.003	1.12009	220	4.472	0.238492	220	20.734	1.10574	220	17.695	0.943674	220	9.22
224	10.05	0.535967	224	3.5	0.186655	224	22.55	1.20259	224	4.528	0.241478	224	3.64	0.194121	224	29.262	1.56054	224	11.314	0.603376	224	8.016	0.427493	224	8.382	0.447012	224	8.276	0.441359	224	8.746	0.466424	224	31.516	1.68075	224	22.893	1.22088	224	6.839	0.364724	224	22.023	1.17449	224	15.092	0.804856	224	7.601
228	11.281	0.601616	228	9.823	0.523861	228	20.025	1.06793	228	3.354	0.178869	228	5.408	0.288409	228	32.039	1.70864	228	9.552	0.509408	228	17.903	0.954767	228	12.379	0.660172	228	7.28	0.388242	228	8.201	0.437359	228	33.971	1.81167	228	22.336	1.19118	228	7.28	0.388242	228	24.009	1.2804	228	14.193	0.756913	228	6.749
232	11.853	0.63212	232	10.05	0.535967	232	22.051	1.17598	232	3.354	0.178869	232	5.701	0.304034	232	26.249	1.39986	232	9.618	0.512928	232	21.57	1.15033	232	5.701	0.304034	232	7.632	0.407015	232	12.54	0.668758	232	34.007	1.81359	232	25.144	1.34093	232	6.325	0.337312	232	28.198	1.5038	232	7.867	0.419547	232	8.975
236	14.534	0.775098	236	10.689	0.570044	236	19.729	1.05215	236	6.801	0.362697	236	6.576	0.350698	236	30.108	1.60566	236	6.103	0.325473	236	18.822	1.00378	236	3.354	0.178869	236	4.61	0.245851	236	17.868	0.9529	236	36.09	1.92468	236	29.008	1.547	236	10.734	0.572444	236	31.455	1.6775	236	6.146	0.327766	236	13.864
240	14.213	0.757979	240	11.011	0.587217	240	20.988	1.11929	240	6.671	0.355764	240	4.031	0.214973	240	30.566	1.63008	240	7.632	0.407015	240	12.855	0.685557	240	4.5	0.239985	240	2.5	0.133325	240	17.007	0.906983	240	34.311	1.82981	240	25.669	1.36893	240	11.045	0.58903	240	33.39	1.78069	240	3.727	0.198761	240	11.411
244	15.62	0.833015	244	9	0.47997	244	13.124	0.699903	244	4.528	0.241478	244	6.403	0.341472	244	31.816	1.69675	244	6.519	0.347658	244	12.042	0.6422	244	4.031	0.214973	244	0	0	244	21.26	1.1338	244	30.071	1.60369	244	27.675	1.47591	244	5.821	0.310434	244	34.456	1.83754	244	3.727	0.198761	244	12.824
248	20.304	1.08281	248	13.463	0.717982	248	13.829	0.737501	248	11.011	0.587217	248	7.159	0.381789	248	34.482	1.83893	248	4.61	0.245851	248	15.66	0.835148	248	7.159	0.381789	248	0	0	248	24.398	1.30115	248	25.466	1.3581	248	29.684	1.58305	248	3.333	0.177749	248	36.393	1.94084	248	2.848	0.151884	248	12.12
252	21.03	1.12153	252	14.3	0.762619	252	12.42	0.662359	252	11.402	0.608069	252	7.071	0.377096	252	34.886	1.86047	252	6.519	0.347658	252	15.133	0.807043	252	9.708	0.517728	252	5.5	0.293315	252	21.006	1.12025	252	22.023	1.17449	252	29.454	1.57078	252	11.045	0.58903	252	36.644	1.95422	252	3.682	0.196361	252	11.823
256	22.209	1.18441	256	15.207	0.810989	256	11.927	0.636067	256	8.515	0.454105	256	10.124	0.539913	256	40.028	2.13469	256	6.325	0.337312	256	14	0.74662	256	14.714	0.784698	256	6	0.31998	256	19.812	1.05657	256	24.749	1.31986	256	29.697	1.58374	256	12.078	0.64412	256	39.491	2.10606	256	4.269	0.227666	256	11.324
260	20.94	1.11673	260	20.23	1.07887	260	15.692	0.836854	260	6.964	0.37139	260	12.104	0.645506	260	38.91	2.07507	260	6.519	0.347658	260	12.748	0.679851	260	14.773	0.787844	260	8.5	0.453305	260	24.91	1.32845	260	19.704	1.05081	260	32.541	1.73541	260	20.616	1.09945	260	40.256	2.14685	260	6.037	0.321953	260	11.141
264	21.932	1.16963	264	13.435	0.716489	264	16.508	0.880372	264	4.717	0.251558	264	14.08	0.750886	264	40.872	2.1797	264	6.021	0.3211	264	16.651	0.887998	264	14.3	0.762619	264	10.966	0.584817	264	22.727	1.21203	264	16.378	0.873439	264	37.513	2.00057	264	22.804	1.21614	264	40.863	2.17922	264	9.298	0.495862	264	14.395
268	23.436	1.24984	268	8.246	0.439759	268	19.235	1.0258	268	6.5	0.346645	268	13.2	0.703956	268	43.003	2.29335	268	11.8	0.629294	268	7.071	0.377096	268	16.808	0.896371	268	11.673	0.622521	268	22.984	1.22574	268	15.89	0.847414	268	36.015	1.92068	268	20.202	1.07737	268	42.492	2.2661	268	6.333	0.337739	268	15.962
272	25.08	1.33752	272	9.925	0.5293	272	23.505	1.25352	272	6.5	0.346645	272	15.945	0.850347	272	40.636	2.16712	272	8.746	0.466424	272	3.905	0.208254	272	19.704	1.05081	272	13	0.69329	272	14.16	0.755153	272	11.102	0.59207	272	31.632	1.68693	272	19.394	1.03428	272	35.839	1.91129	272	3.283	0.175082	272	11.595
276	29.155	1.55484	276	3.354	0.178869	276	17.72	0.945008	276	8.559	0.456451	276	16.401	0.874665	276	40.807	2.17624	276	12.54	0.668758	276	3.202	0.170763	276	16.621	0.886398	276	9.014	0.480717	276	21.57	1.15033	276	9.618	0.512928	276	20.224	1.07855	276	19.576	1.04399	276	29.547	1.57574	276	7.032	0.375017	276	8.34
280	29.017	1.54748	280	0	0	280	20.012	1.06724	280	10.124	0.539913	280	16.447	0.877119	280	45.354	2.41873	280	12.53	0.668225	280	3.606	0.192308	280	16.279	0.868159	280	12	0.63996	280	27.336	1.45783	280	7.159	0.381789	280	16.003	0.85344	280	19.093	1.01823	280	23.298	1.24248	280	6.667	0.355551	280	15.206
284	30.761	1.64048	284	0	0	284	11.769	0.627641	284	11.236	0.599216	284	17.72	0.945008	284	42.851	2.28524	284	13.2	0.703956	284	11.402	0.608069	284	12.748	0.679851	284	11.673	0.622521	284	31.121	1.65968	284	3.354	0.178869	284	17.789	0.948687	284	21.271	1.13438	284	15.293	0.815576	284	12.806	0.682944	284	11.705
288	21.523	1.14782	288	2.915	0.155457	288	11.63	0.620228	288	10.124	0.539913	288	16.763	0.893971	288	46.328	2.47067	288	9.5	0.506635	288	0	0	288	7.018	0.37427	288	15.652	0.834721	288	35.018	1.86751	288	1	0.05333	288	12.225	0.651959	288	23.87	1.27299	288	7.923	0.422534	288	13.437	0.716595	288	9.153
292	12.816	0.683477	292	3.808	0.203081	292	8.078	0.4308	292	13.946	0.74374	292	20.5	1.09327	292	46.607	2.48555	292	11.662	0.621934	292	1.803	0.096154	292	5.701	0.304034	292	13.73	0.732221	292	34.384	1.8337	292	0	0	292	4.216	0.224839	292	22.864	1.21934	292	4.333	0.231079	292	15.232	0.812323	292	13.208
296	9.5	0.506635	296	0	0	296	4.031	0.214973	296	13.601	0.725341	296	20.012	1.06724	296	45.511	2.4271	296	9.014	0.480717	296	0	0	296	4.717	0.251558	296	9.055	0.482903	296	37.845	2.01827	296	1.5	0.079995	296	4.014	0.214067	296	24.388	1.30061	296	4.534	0.241798	296	9.534	0.508448	296	16.087
300	8.559	0.456451	300	0	0	300	4	0.21332	300	14.705	0.784218	300	20.797	1.1091	300	49.041	2.61536	300	7.433	0.396402	300	2.062	0.109966	300	3.536	0.188575	300	3.536	0.188575	300	41.379	2.20674	300	3.041	0.162177	300	5	0.26665	300	31.514	1.68064	300	3.902	0.208094	300	9.899	0.527914	300	15.524
304	8.746	0.466424	304	0	0	304	6.265	0.334112	304	12.53	0.668225	304	21.29	1.1354	304	45.398	2.42108	304	6.364	0.339392	304	2.5	0.133325	304	3.202	0.170763	304	1.5	0.079995	304	36.878	1.9667	304	6	0.31998	304	7.846	0.418427	304	29.689	1.58331	304	6	0.31998	304	8.028	0.428133	304	17.601
308	6.5	0.346645	308	0	0	308	10	0.5333	308	11.045	0.58903	308	19.602	1.04537	308	45.277	2.41462	308	6.5	0.346645	308	5.025	0.267983	308	3	0.15999	308	2.915	0.155457	308	38.471	2.05166	308	6.964	0.37139	308	10.672	0.569138	308	31.418	1.67552	308	4.773	0.254544	308	6.839	0.364724	308	17.088
312	6	0.31998	312	4.272	0.227826	312	13.454	0.717502	312	12.021	0.64108	312	15.232	0.812323	312	43.29	2.30866	312	6.185	0.329846	312	2.062	0.109966	312	2.062	0.109966	312	6.042	0.32222	312	40.512	2.1605	312	8.382	0.447012	312	10.269	0.547646	312	32.258	1.72032	312	3.801	0.202707	312	6.667	0.355551	312	17.391
316	7.159	0.381789	316	5.852	0.312087	316	15.914	0.848694	316	10.607	0.565671	316	12.51	0.667158	316	44.747	2.38636	316	6.671	0.355764	316	9.179	0.489516	316	0	0	316	4.031	0.214973	316	38.736	2.06579	316	6.946	0.37043	316	12.728	0.678784	316	32.694	1.74357	316	4.714	0.251398	316	10.462	0.557938	316	14.682
320	7.433	0.396402	320	1.581	0.0843147	320	18.062	0.963246	320	7	0.37331	320	7.616	0.406161	320	40.025	2.13453	320	5.523	0.294542	320	10.296	0.549086	320	0	0	320	5.5	0.293315	320	40.697	2.17037	320	8.322	0.443812	320	15.624	0.833228	320	34.262	1.82719	320	9.339	0.498049	320	10.16	0.541833	320	12.019
324	7.018	0.37427	324	0	0	324	18.028	0.961433	324	6	0.31998	324	6.946	0.37043	324	36.449	1.94383	324	6.671	0.355764	324	13.285	0.708489	324	6.403	0.341472	324	5.025	0.267983	324	38.736	2.06579	324	8.86	0.472504	324	17.208	0.917703	324	32.505	1.73349	324	10.435	0.556499	324	12.824	0.683904	324	4.955
328	5	0.26665	328	4.5	0.239985	328	21.506	1.14691	328	7.433	0.396402	328	3	0.15999	328	39.806	2.12285	328	6.5	0.346645	328	15.264	0.814029	328	12.649	0.674571	328	8.846	0.471757	328	37.59	2.00467	328	7.826	0.417361	328	20.072	1.07044	328	23.535	1.25512	328	14.885	0.793817	328	14.472	0.771792	328	3.771
332	6.5	0.346645	332	3.202	0.170763	332	23.2	1.23726	332	6.964	0.37139	332	5.148	0.274543	332	37.567	2.00345	332	6.325	0.337312	332	2.693	0.143618	332	14.773	0.787844	332	18.439	0.983352	332	36.705	1.95748	332	5.385	0.287182	332	15.074	0.803896	332	24.333	1.29768	332	18.068	0.963566	332	14.422	0.769125	332	1.374
336	7.566	0.403495	336	3.5	0.186655	336	24.91	1.32845	336	8.016	0.427493	336	3.905	0.208254	336	29.069	1.55025	336	6.519	0.347658	336	2.062	0.109966	336	14	0.74662	336	19.799	1.05588	336	36.418	1.94217	336	6.576	0.350698	336	10.203	0.544126	336	14.36	0.765819	336	16.55	0.882612	336	19.232	1.02564	336	3.35
340	5.701	0.304034	340	5.385	0.287182	340	28.306	1.50956	340	8.5	0.453305	340	5.385	0.287182	340	27.391	1.46076	340	7.649	0.407921	340	4	0.21332	340	17.529	0.934822	340	16.651	0.887998	340	37.313	1.9899	340	6.021	0.3211	340	4.269	0.227666	340	8.724	0.465251	340	16.055	0.856213	340	22.236	1.18585	340	4.177
344	6.708	0.357738	344	4.5	0.239985	344	27.735	1.47911	344	7.018	0.37427	344	7.5	0.399975	344	27.735	1.47911	344	11	0.58663	344	6.021	0.3211	344	6.083	0.324406	344	13.435	0.716489	344	40.401	2.15459	344	6.325	0.337312	344	3	0.15999	344	5.696	0.303768	344	16.697	0.890451	344	21.738	1.15929	344	4.069
348	4.61	0.245851	348	6.403	0.341472	348	31.089	1.65798	348	7.159	0.381789	348	11.402	0.608069	348	23.717	1.26483	348	12.54	0.668758	348	6.727	0.358751	348	6.5	0.346645	348	2.55	0.135991	348	42.074	2.24381	348	3	0.15999	348	5.821	0.310434	348	3.162	0.168629	348	23.732	1.26563	348	22.961	1.22451	348	5.588
352	9.014	0.480717	352	10.77	0.574364	352	29.618	1.57953	352	6.403	0.341472	352	12.855	0.685557	352	21.541	1.14878	352	15.033	0.80171	352	8.902	0.474744	352	5.852	0.312087	352	5.099	0.27193	352	44.23	2.35879	352	1.581	0.0843147	352	11.571	0.617081	352	3	0.15999	352	23.61	1.25912	352	24.278	1.29475	352	5
356	9.22	0.491703	356	8	0.42664	356	30.566	1.63008	356	8.062	0.429946	356	12.659	0.675104	356	19.906	1.06159	356	12.166	0.648813	356	14.16	0.755153	356	3.905	0.208254	356	7.517	0.400882	356	53.108	2.83225	356	3.536	0.188575	356	12.601	0.672011	356	2.108	0.11242	356	24.205	1.29085	356	19.565	1.0434	356	7.52
360	11.413	0.608655	360	4.528	0.241478	360	30.22	1.61163	360	9.434	0.503115	360	12.816	0.683477	360	20	1.0666	360	12.748	0.679851	360	15.182	0.809656	360	6.403	0.341472	360	3	0.15999	360	54.116	2.88601	360	4	0.21332	360	14.15	0.754619	360	4.014	0.214067	360	26.585	1.41778	360	15.67	0.835681	360	7.52
364	13.509	0.720435	364	13.153	0.701449	364	31.945	1.70363	364	9.192	0.490209	364	14.318	0.763579	364	15.572	0.830455	364	11.597	0.618468	364	9.899	0.527914	364	11.769	0.627641	364	2.5	0.133325	364	55.301	2.9492	364	3.041	0.162177	364	17.641	0.940795	364	7.364	0.392722	364	27.072	1.44375	364	25.441	1.35677	364	9.055
368	10.735	0.572498	368	15.66	0.835148	368	31.847	1.6984	368	12.093	0.64492	368	13.2	0.703956	368	13.038	0.695317	368	10.308	0.549726	368	6.021	0.3211	368	15.652	0.834721	368	4.5	0.239985	368	43.046	2.29564	368	5	0.26665	368	15.934	0.84976	368	5.667	0.302221	368	20.292	1.08217	368	22.959	1.2244	368	8.692
372	9.394	0.500982	372	18.035	0.961807	372	31.536	1.68181	372	4	0.21332	372	14.866	0.792804	372	8.276	0.441359	372	9.014	0.480717	372	8.602	0.458745	372	15.532	0.828322	372	7.071	0.377096	372	34.384	1.8337	372	5.148	0.274543	372	18.135	0.96714	372	6.96	0.371177	372	15.366	0.819469	372	22.01	1.17379	372	12.333
376	5.852	0.312087	376	14.3	0.762619	376	27.785	1.48177	376	7.566	0.403495	376	12.51	0.667158	376	8.485	0.452505	376	9.394	0.500982	376	7.616	0.406161	376	15.945	0.850347	376	3.905	0.208254	376	25.544	1.36226	376	9.434	0.503115	376	15.114	0.80603	376	8.353	0.445465	376	9.333	0.497729	376	18.306	0.976259	376	10.75
380	3.905	0.208254	380	6.964	0.37139	380	25.125	1.33992	380	6.364	0.339392	380	11.18	0.596229	380	6.021	0.3211	380	10.259	0.547112	380	6.801	0.362697	380	10.63	0.566898	380	3.5	0.186655	380	18.561	0.989858	380	6.042	0.32222	380	14.621	0.779738	380	11.377	0.606735	380	6.864	0.366057	380	17.751	0.946661	380	10.29
384	5.315	0.283449	384	1.5	0.079995	384	21.932	1.16963	384	6.021	0.3211	384	5.5	0.293315	384	4	0.21332	384	14.089	0.751366	384	4.924	0.262597	384	6.021	0.3211	384	0	0	384	12.042	0.6422	384	7.649	0.407921	384	14.896	0.794404	384	11.175	0.595963	384	9.481	0.505622	384	13.038	0.695317	384	12.512
388	2.693	0.143618	388	2	0.10666	388	14.3	0.762619	388	5.22	0.278383	388	8.559	0.456451	388	4.031	0.214973	388	14.765	0.787417	388	6.5	0.346645	388	7.433	0.396402	388	0	0	388	11.853	0.63212	388	9.014	0.480717	388	12.601	0.672011	388	10.687	0.569938	388	8.57	0.457038	388	5.548	0.295875	388	3.543
392	5.099	0.27193	392	0	0	392	15.207	0.810989	392	2.5	0.133325	392	7.433	0.396402	392	5.701	0.304034	392	11.8	0.629294	392	11.281	0.601616	392	7.762	0.413947	392	0	0	392	10.062	0.536606	392	6.519	0.347658	392	16.856	0.89893	392	7.032	0.375017	392	9.718	0.518261	392	8.246	0.439759	392	10.541
396	9	0.47997	396	0	0	396	17.029	0.908157	396	6.042	0.32222	396	6.801	0.362697	396	7.906	0.421627	396	9.708	0.517728	396	14.431	0.769605	396	8.078	0.4308	396	0	0	396	13.928	0.74278	396	5.831	0.310967	396	15.902	0.848054	396	13.812	0.736594	396	8.975	0.478637	396	9.551	0.509355	396	10.269
400	8	0.42664	400	0	0	400	12.51	0.667158	400	8.276	0.441359	400	11.673	0.622521	400	8.846	0.471757	400	10.259	0.547112	400	6.727	0.358751	400	6.708	0.357738	400	0	0	400	12.5	0.666625	400	6.964	0.37139	400	17.133	0.913703	400	13.828	0.737447	400	9.357	0.499009	400	10.734	0.572444	400	9.735
404	8.559	0.456451	404	0	0	404	9.22	0.491703	404	6.042	0.32222	404	11.314	0.603376	404	11.673	0.622521	404	9.618	0.512928	404	9.055	0.482903	404	3.536	0.188575	404	0	0	404	13.463	0.717982	404	9.849	0.525247	404	13.683	0.729714	404	12.966	0.691477	404	9.69	0.516768	404	12.481	0.665612	404	7.81
408	9.014	0.480717	408	0	0	408	3.536	0.188575	408	8.944	0.476984	408	15.403	0.821442	408	14.009	0.7471	408	12.42	0.662359	408	12.01	0.640493	408	3.905	0.208254	408	0	0	408	16.279	0.868159	408	9.849	0.525247	408	13.017	0.694197	408	11.968	0.638253	408	7.667	0.408881	408	13.072	0.69713	408	9.339
412	10.966	0.584817	412	0	0	412	7.433	0.396402	412	8.559	0.456451	412	13.124	0.699903	412	17.464	0.931355	412	10.817	0.576871	412	12.021	0.64108	412	8.246	0.439759	412	3	0.15999	412	19.059	1.01642	412	11.18	0.596229	412	18.012	0.96058	412	7.674	0.409254	412	4.447	0.237159	412	13.308	0.709716	412	9.758
416	7.071	0.377096	416	0	0	416	9.618	0.512928	416	10.5	0.559965	416	15.305	0.816216	416	17.328	0.924102	416	7.81	0.416507	416	9.862	0.52594	416	10.308	0.549726	416	1	0.05333	416	19.506	1.04025	416	11.715	0.624761	416	24.716	1.3181	416	9.286	0.495222	416	4.667	0.248891	416	14.181	0.756273	416	8.544
420	9.605	0.512235	420	0	0	420	10.977	0.585403	420	11.8	0.629294	420	17.889	0.95402	420	14.16	0.755153	420	10.595	0.565031	420	9.301	0.496022	420	11.011	0.587217	420	1	0.05333	420	13.647	0.727795	420	12.748	0.679851	420	23.039	1.22867	420	10.651	0.568018	420	4.243	0.226279	420	17.401	0.927995	420	16.455
424	12.54	0.668758	424	0	0	424	12.659	0.675104	424	12.104	0.645506	424	18.446	0.983725	424	18.028	0.961433	424	9.552	0.509408	424	4.031	0.214973	424	12.903	0.688117	424	1.5	0.079995	424	12.093	0.64492	424	29.262	1.56054	424	27.669	1.47559	424	6.412	0.341952	424	4.069	0.217	424	15.723	0.838508	424	19.143
428	12.258	0.653719	428	0	0	428	9.823	0.523861	428	12.083	0.644386	428	17.734	0.945754	428	18.062	0.963246	428	10.296	0.549086	428	2	0.10666	428	16.919	0.90229	428	5.099	0.27193	428	11.8	0.629294	428	28.306	1.50956	428	27.455	1.46418	428	9.025	0.481303	428	3.018	0.16095	428	12.387	0.660599	428	19.474
432	8.559	0.456451	432	0	0	432	4.472	0.238492	432	14.577	0.777391	432	19.831	1.05759	432	18.398	0.981165	432	13.946	0.74374	432	5	0.26665	432	18.901	1.00799	432	8.016	0.427493	432	15.075	0.80395	432	26.926	1.43596	432	34.469	1.83823	432	15.202	0.810723	432	0	0	432	13.679	0.729501	432	21.667
436	5.385	0.287182	436	3.041	0.162177	436	0.707	0.0377043	436	19.5	1.03994	436	20.518	1.09422	436	18.31	0.976472	436	15.692	0.836854	436	6	0.31998	436	16.279	0.868159	436	13.793	0.735581	436	13.583	0.724381	436	30.7	1.63723	436	28.057	1.49628	436	9.339	0.498049	436	0	0	436	16.826	0.897331	436	22.423
440	5.59	0.298115	440	4	0.21332	440	0	0	440	18.344	0.978286	440	19.449	1.03722	440	25.224	1.3452	440	13.238	0.705983	440	12.166	0.648813	440	15.207	0.810989	440	12.619	0.672971	440	17.029	0.908157	440	26.077	1.39069	440	36.31	1.93641	440	1.667	0.0889011	440	3.48	0.185588	440	15.563	0.829975	440	25.414
444	6.103	0.325473	444	3.202	0.170763	444	0	0	444	19.449	1.03722	444	21.272	1.13444	444	27.5	1.46657	444	15.182	0.809656	444	15.403	0.821442	444	10.062	0.536606	444	14.534	0.775098	444	10.05	0.535967	444	23.927	1.27603	444	36.252	1.93332	444	3	0.15999	444	2.108	0.11242	444	20.809	1.10974	444	24.748
448	4.61	0.245851	448	2.5	0.133325	448	0	0	448	15.66	0.835148	448	19.812	1.05657	448	28.504	1.52012	448	16.771	0.894397	448	15.532	0.828322	448	18.822	1.00378	448	15.572	0.830455	448	9.341	0.498156	448	32.596	1.73834	448	35.978	1.91871	448	3.073	0.163883	448	0	0	448	21.705	1.15753	448	16.028
452	4.301	0.229372	452	3.5	0.186655	452	0	0	452	21.593	1.15155	452	14.866	0.792804	452	29.908	1.59499	452	10.44	0.556765	452	16.348	0.871839	452	22.902	1.22136	452	19.449	1.03722	452	11.543	0.615588	452	33.185	1.76976	452	40.302	2.14931	452	2.236	0.119246	452	4.333	0.231079	452	28.521	1.52102	452	16.035
456	6.5	0.346645	456	0	0	456	5.831	0.310967	456	22.522	1.2011	456	13.73	0.732221	456	27.354	1.45879	456	7	0.37331	456	21.095	1.125	456	21.783	1.16169	456	21.219	1.13161	456	10.77	0.574364	456	34.821	1.857	456	38.727	2.06531	456	2	0.10666	456	7.126	0.38003	456	27.329	1.45746	456	4.333
460	9.014	0.480717	460	10.817	0.576871	460	3.5	0.186655	460	16.5	0.879945	460	14.009	0.7471	460	28.849	1.53852	460	6.021	0.3211	460	15.692	0.836854	460	12.093	0.64492	460	23.712	1.26456	460	16.325	0.870612	460	37.03	1.97481	460	45.934	2.44966	460	4.333	0.231079	460	7.867	0.419547	460	32.299	1.72251	460	9.153
464	6.946	0.37043	464	9.192	0.490209	464	7.159	0.381789	464	9.962	0.531273	464	16.008	0.853707	464	29.069	1.55025	464	3	0.15999	464	20.156	1.07492	464	4.123	0.21988	464	21.8	1.16259	464	17.27	0.921009	464	36.045	1.92228	464	48.268	2.57413	464	4.447	0.237159	464	0	0	464	32.133	1.71365	464	5.175
468	9.014	0.480717	468	8.485	0.452505	468	5.59	0.298115	468	3.808	0.203081	468	20.18	1.0762	468	24.274	1.29453	468	1.581	0.0843147	468	17.614	0.939355	468	3.808	0.203081	468	22.727	1.21203	468	19.799	1.05588	468	40.389	2.15395	468	50.423	2.68906	468	8.667	0.462211	468	0	0	468	31.401	1.67462	468	2.539
472	11.424	0.609242	472	12.093	0.64492	472	1.5	0.079995	472	3.354	0.178869	472	23.505	1.25352	472	23.162	1.23523	472	4	0.21332	472	16.867	0.899517	472	4	0.21332	472	18.742	0.999511	472	20.23	1.07887	472	40.311	2.14979	472	53.339	2.84457	472	7.753	0.413467	472	0	0	472	32.53	1.73482	472	6.566
476	12.903	0.688117	476	9.618	0.512928	476	0	0	476	6.021	0.3211	476	22.727	1.21203	476	21.077	1.12404	476	8	0.42664	476	15.7	0.837281	476	8.515	0.454105	476	25.125	1.33992	476	16.263	0.867306	476	43.177	2.30263	476	57.009	3.04029	476	6.839	0.364724	476	0	0	476	39.127	2.08664	476	5.907
480	11.402	0.608069	480	4.528	0.241478	480	3.536	0.188575	480	7.106	0.378963	480	22.147	1.1811	480	18.868	1.00623	480	9.124	0.486583	480	17.088	0.911303	480	7.616	0.406161	480	26.005	1.38685	480	9.301	0.496022	480	43.324	2.31047	480	47.16	2.51504	480	9.068	0.483596	480	0	0	480	39.363	2.09923	480	6.009
484	11.662	0.621934	484	0	0	484	2.55	0.135991	484	7.159	0.381789	484	24.233	1.29235	484	15.652	0.834721	484	8.559	0.456451	484	17.088	0.911303	484	7.826	0.417361	484	26.5	1.41325	484	2.5	0.133325	484	46.09	2.45798	484	38.416	2.04873	484	9.244	0.492983	484	0	0	484	24.75	1.31992	484	3.073
488	6.403	0.341472	488	2.693	0.143618	488	3.5	0.186655	488	9.22	0.491703	488	24.151	1.28797	488	12.104	0.645506	488	5.5	0.293315	488	16.808	0.896371	488	8.559	0.456451	488	20	1.0666	488	0	0	488	46.352	2.47195	488	46.019	2.45419	488	12.565	0.670091	488	0	0	488	21.922	1.1691	488	8.34
492	4.61	0.245851	492	3	0.15999	492	5.523	0.294542	492	11.662	0.621934	492	23.505	1.25352	492	8.322	0.443812	492	4.743	0.252944	492	13.038	0.695317	492	9.394	0.500982	492	14.603	0.778778	492	0	0	492	46.53	2.48144	492	37.959	2.02435	492	11.557	0.616335	492	0	0	492	28.178	1.50273	492	5.821
496	5.22	0.278383	496	2.5	0.133325	496	5.22	0.278383	496	15.532	0.828322	496	28.692	1.53014	496	7.433	0.396402	496	3.536	0.188575	496	17.847	0.951781	496	4.717	0.251558	496	9.925	0.5293	496	0	0	496	46.457	2.47755	496	29.987	1.59921	496	16.275	0.867946	496	0	0	496	28.669	1.52892	496	9.804
500	6.185	0.329846	500	4.031	0.214973	500	9.394	0.500982	500	17.557	0.936315	500	27.372	1.45975	500	7.211	0.384563	500	5	0.26665	500	14.116	0.752806	500	5.59	0.298115	500	3.5	0.186655	500	6.042	0.32222	500	41.677	2.22263	500	22.103	1.17875	500	17.92	0.955674	500	0	0	500	32.366	1.72608	500	9.153
504	8.016	0.427493	504	5.385	0.287182	504	9.014	0.480717	504	18.248	0.973166	504	27.203	1.45074	504	7.5	0.399975	504	8.86	0.472504	504	9.552	0.509408	504	5.59	0.298115	504	2.915	0.155457	504	6.5	0.346645	504	33.708	1.79765	504	17.075	0.91061	504	14.24	0.759419	504	0	0	504	31.202	1.664	504	10.687
508	9.618	0.512928	508	8.559	0.456451	508	13.537	0.721928	508	16.621	0.886398	508	28.43	1.51617	508	8.246	0.439759	508	10.44	0.556765	508	7.071	0.377096	508	7.616	0.406161	508	3.041	0.162177	508	6.671	0.355764	508	29.547	1.57574	508	10.609	0.565778	508	5.897	0.314487	508	0	0	508	34.655	1.84815	508	16.418
512	11.63	0.620228	512	9.513	0.507328	512	12.53	0.668225	512	19.474	1.03855	512	26.505	1.41351	512	6.325	0.337312	512	12.51	0.667158	512	6.801	0.362697	512	8.139	0.434053	512	1.5	0.079995	512	4.924	0.262597	512	16.378	0.873439	512	6.2	0.330646	512	13.199	0.703903	512	0	0	512	36.494	1.94623	512	16.169
516	10.124	0.539913	516	10.548	0.562525	516	14.577	0.777391	516	19.474	1.03855	516	25.622	1.36642	516	7.826	0.417361	516	15.008	0.800377	516	7.071	0.377096	516	13.647	0.727795	516	1.803	0.096154	516	7.5	0.399975	516	13.793	0.735581	516	5.831	0.310967	516	19.805	1.0562	516	0	0	516	40.346	2.15165	516	10.817
520	10.05	0.535967	520	11.769	0.627641	520	15.89	0.847414	520	21.783	1.16169	520	20.402	1.08804	520	6.185	0.329846	520	11.236	0.599216	520	7.382	0.393682	520	4.123	0.21988	520	5.315	0.283449	520	6.801	0.362697	520	10.7	0.570631	520	11.338	0.604656	520	20.377	1.08671	520	0	0	520	42.005	2.24013	520	16.997
524	12.5	0.666625	524	14.213	0.757979	524	11.102	0.59207	524	22.091	1.17811	524	14.142	0.754193	524	5.701	0.304034	524	12.093	0.64492	524	10.966	0.584817	524	8.246	0.439759	524	10.308	0.549726	524	11.885	0.633827	524	10	0.5333	524	11.081	0.59095	524	12.579	0.670838	524	0	0	524	39.936	2.12979	524	4.333
528	10.198	0.543859	528	11.715	0.624761	528	5.831	0.310967	528	23.633	1.26035	528	10.308	0.549726	528	2.121	0.113113	528	15.435	0.823149	528	8.139	0.434053	528	5.59	0.298115	528	7.106	0.378963	528	9.192	0.490209	528	6.185	0.329846	528	12.776	0.681344	528	14.395	0.767685	528	5.044	0.268997	528	30.516	1.62742	528	1.202
532	10.05	0.535967	532	15.403	0.821442	532	6.103	0.325473	532	16.808	0.896371	532	10.735	0.572498	532	6.964	0.37139	532	14.318	0.763579	532	9.657	0.515008	532	5.59	0.298115	532	7.28	0.388242	532	11.402	0.608069	532	4.5	0.239985	532	10.382	0.553672	532	13.828	0.737447	532	15.18	0.809549	532	30.35	1.61857	532	0
536	8.846	0.471757	536	7.906	0.421627	536	6.103	0.325473	536	18.18	0.969539	536	7.826	0.417361	536	5.701	0.304034	536	9.014	0.480717	536	12.42	0.662359	536	5	0.26665	536	9.014	0.480717	536	14.577	0.777391	536	3.536	0.188575	536	12.649	0.674571	536	16.935	0.903144	536	16.055	0.856213	536	32.484	1.73237	536	8.413
540	10.92	0.582364	540	11.336	0.604549	540	7.632	0.407015	540	17.029	0.908157	540	4.528	0.241478	540	4.528	0.241478	540	10.05	0.535967	540	13.5	0.719955	540	5.657	0.301688	540	12	0.63996	540	16.447	0.877119	540	7.826	0.417361	540	15.337	0.817922	540	15.585	0.831148	540	11.926	0.636014	540	21.2	1.1306	540	14.61
544	8.602	0.458745	544	14.603	0.778778	544	8.246	0.439759	544	11.673	0.622521	544	3.536	0.188575	544	2.915	0.155457	544	15.207	0.810989	544	16.808	0.896371	544	7.159	0.381789	544	9.618	0.512928	544	19.32	1.03034	544	8.944	0.476984	544	16.55	0.882612	544	18.871	1.00639	544	18.634	0.993751	544	25.221	1.34504	544	13.744
548	7.762	0.413947	548	10.966	0.584817	548	7.616	0.406161	548	12.021	0.64108	548	4.5	0.239985	548	4	0.21332	548	18.028	0.961433	548	18.742	0.999511	548	10.735	0.572498	548	6.265	0.334112	548	18.795	1.00234	548	7.433	0.396402	548	15.846	0.845067	548	21.669	1.15561	548	24.083	1.28435	548	14.735	0.785818	548	11.823
552	8.016	0.427493	552	9.301	0.496022	552	7.5	0.399975	552	13.2	0.703956	552	3.606	0.192308	552	6.964	0.37139	552	11.102	0.59207	552	18.822	1.00378	552	12.728	0.678784	552	4.528	0.241478	552	19.164	1.02202	552	5	0.26665	552	17	0.90661	552	30.157	1.60827	552	28.57	1.52364	552	32.313	1.72325	552	4.773
556	10.124	0.539913	556	15.953	0.850773	556	15.5	0.826615	556	13.086	0.697876	556	8.382	0.447012	556	8.515	0.454105	556	7.906	0.421627	556	23.431	1.24958	556	14.577	0.777391	556	7.517	0.400882	556	18.028	0.961433	556	4	0.21332	556	18	0.95994	556	33.658	1.79498	556	27.747	1.47975	556	37.4	1.99454	556	3.887
560	4.924	0.262597	560	14.577	0.777391	560	14.221	0.758406	560	14.221	0.758406	560	6.519	0.347658	560	7.906	0.421627	560	5.025	0.267983	560	18.722	0.998444	560	13.314	0.710036	560	6.083	0.324406	560	17.357	0.925649	560	5.852	0.312087	560	22.755	1.21352	560	34.06	1.81642	560	30.641	1.63408	560	37.72	2.01161	560	7.318
564	7.5	0.399975	564	17.889	0.95402	564	15	0.79995	564	15.075	0.80395	564	10.124	0.539913	564	11.8	0.629294	564	12.42	0.662359	564	17.868	0.9529	564	16.125	0.859946	564	13.928	0.74278	564	16.568	0.883571	564	6.964	0.37139	564	16.388	0.873972	564	37.924	2.02249	564	31.307	1.6696	564	34.026	1.81461	564	10.651
568	9.014	0.480717	568	13.757	0.733661	568	11	0.58663	568	17.507	0.933648	568	8.246	0.439759	568	10.124	0.539913	568	11.715	0.624761	568	17.868	0.9529	568	17.614	0.939355	568	6.021	0.3211	568	16.378	0.873439	568	8.382	0.447012	568	20.989	1.11934	568	38.023	2.02777	568	29.12	1.55297	568	37.106	1.97886	568	10.349
572	7.517	0.400882	572	12.083	0.644386	572	13.153	0.701449	572	20.056	1.06959	572	9.394	0.500982	572	14.773	0.787844	572	19.558	1.04303	572	12.379	0.660172	572	11.424	0.609242	572	3	0.15999	572	19.164	1.02202	572	8.078	0.4308	572	14.337	0.764592	572	39.459	2.10435	572	25.634	1.36706	572	42.526	2.26791	572	5.548
576	5.148	0.274543	576	15.207	0.810989	576	17.117	0.91285	576	19.5	1.03994	576	11.045	0.58903	576	12.042	0.6422	576	18.742	0.999511	576	11.715	0.624761	576	15.508	0.827042	576	2	0.10666	576	16.568	0.883571	576	8.5	0.453305	576	4.714	0.251398	576	38.37	2.04627	576	29.033	1.54833	576	45.436	2.4231	576	8.692
580	0	0	580	8.246	0.439759	580	20.887	1.1139	580	20.5	1.09327	580	10	0.5333	580	5.408	0.288409	580	21.26	1.1338	580	14.5	0.773285	580	12.748	0.679851	580	4.272	0.227826	580	12.5	0.666625	580	10.308	0.549726	580	0	0	580	41.419	2.20888	580	28.052	1.49601	580	45.222	2.41169	580	16.526
584	0	0	584	9.192	0.490209	584	21.378	1.14009	584	19.66	1.04847	584	9.341	0.498156	584	3.606	0.192308	584	22.299	1.18921	584	16.279	0.868159	584	12.649	0.674571	584	3.041	0.162177	584	5.523	0.294542	584	9.708	0.517728	584	0	0	584	34.585	1.84442	584	28.674	1.52918	584	46.536	2.48176	584	16.128
588	8.5	0.453305	588	7.762	0.413947	588	19.698	1.05049	588	18.668	0.995564	588	12.369	0.659639	588	0	0	588	23.022	1.22776	588	14.3	0.762619	588	6.5	0.346645	588	4	0.21332	588	0	0	588	10.966	0.584817	588	0	0	588	28.538	1.52193	588	25.71	1.37111	588	48.94	2.60997	588	19.437
592	14.151	0.754673	592	13.124	0.699903	592	18.868	1.00623	592	11.705	0.624228	592	12.649	0.674571	592	0	0	592	23.817	1.27016	592	17.241	0.919463	592	0.707	0.0377043	592	4.528	0.241478	592	0	0	592	11.885	0.633827	592	0	0	592	25.517	1.36082	592	29.486	1.57249	592	52.215	2.78463	592	18.187
596	11	0.58663	596	14.577	0.777391	596	17.328	0.924102	596	9.434	0.503115	596	13.946	0.74374	596	0	0	596	26.632	1.42028	596	18.668	0.995564	596	0	0	596	7.826	0.417361	596	0	0	596	9.014	0.480717	596	2.603	0.138818	596	24.205	1.29085	596	18.114	0.96602	596	52.945	2.82356	596	20.301
600	10.735	0.572498	600	13.865	0.73942	600	15.572	0.830455	600	6.576	0.350698	600	11.102	0.59207	600	2.693	0.143618	600	26.173	1.39581	600	13.463	0.717982	600	0	0	600	10.404	0.554845	600	3.5	0.186655	600	10.062	0.536606	600	4.014	0.214067	600	17.78	0.948207	600	15.114	0.80603	600	43.729	2.33207	600	24.06
Length stats
MAX	30.761	1.64048		20.23	1.07887		31.945	1.70363		27.987	1.49255		28.692	1.53014		49.041	2.61536		29.262	1.56054		44.096	2.35164		22.902	1.22136		26.5	1.41325		55.301	2.9492		46.53	2.48144		57.009	3.04029		41.419	2.20888		56.395	3.00755		52.945	2.82356		25.414
MIN	0	0		0	0		0	0		0	0		3	0.15999		0	0		1.581	0.0843147		0	0		0	0		0	0		0	0		0	0		0	0		0	0		0	0		0	0		0
AVG	10.5518	0.562727		6.83703	0.364619		13.935	0.743154		11.6036	0.618819		13.0435	0.695611		23.0658	1.2301		11.7255	0.62532		14.561	0.776536		9.99711	0.533146		7.38168	0.393665		20.3674	1.08619		15.2866	0.815233		20.3811	1.08693		12.8697	0.686339		19.413	1.03529		19.7434	1.05292		10.6005
MEDIAN	9.513	0.507328		6.403	0.341472		13.829	0.737501		11.011	0.587217		12.51	0.667158		23.162	1.23523		10.308	0.549726		14.036	0.74854		9.552	0.509408		6.021	0.3211		18.446	0.983725		10	0.5333		17.208	0.917703		10.154	0.541513		18.068	0.963566		16.72	0.891678		10.006
[truncated: 25 more columns]

## Sheet: V410I rates
Date	Section Number	Start Time	End Time	Start Length	End Length	Duration	L change	Polymerization rate	Depolymerization rate	sse	rsquare	dfe	adjrsquare	rmse	Rescue number	Rescue frequency	Catastrophe number	Catastrophe frequency	Total polymerization time	Total depolymerization time	Percent paused	Dynamicity		Polymerization average		Depolymerization average
'1'	4	60	68	8	11.543	8	3.543	26.5725	0	0.342248	0.948291	1	0.896581	0.58502	8	1.42857	6	0.810811	196	88	46.6165	0.384173
'1'	5	68	80	11.543	7.81	12	3.733	0	18.665	0.488621	0.931413	2	0.89712	0.494278	0	0	0	0	0	0	0	0
'1'	7	100	156	0	14.422	56	14.422	15.4521	0	30.1573	0.888001	13	0.879385	1.52309	0	0	0	0	0	0	0	0
'1'	8	156	172	14.422	6.021	16	8.401	0	31.5038	7.65277	0.868857	3	0.825142	1.59716	0	0	0	0	0	0	0	0
'1'	12	208	224	15.652	10.05	16	5.602	0	21.0075	1.78042	0.92115	3	0.894867	0.770372	0	0	0	0	0	0	0	0
'1'	13	224	280	10.05	29.017	56	18.967	20.3218	0	22.6692	0.957349	13	0.954068	1.32052	0	0	0	0	0	0	0	0
'1'	16	328	336	5	7.566	8	2.566	19.245	0	0.0313927	0.990555	1	0.981109	0.17718	0	0	0	0	0	0	0	0
'1'	18	364	380	13.509	3.905	16	9.604	0	36.015	0.812638	0.986191	3	0.981589	0.520461	0	0	0	0	0	0	0	0
'1'	23	448	476	4.61	12.903	28	8.293	17.7707	0	7.78742	0.882528	6	0.86295	1.13926	0	0	0	0	0	0	0	0
'1'	24	476	492	12.903	4.61	16	8.293	0	31.0987	6.73046	0.873776	3	0.831702	1.49783	0	0	0	0	0	0	0	0
'1'	25	492	516	4.61	10.124	24	5.514	13.785	0	4.35912	0.898081	5	0.877697	0.933715	0	0	0	0	0	0	0	0
'1'	27	524	536	12.5	8.846	12	3.654	0	18.27	0.816606	0.883145	2	0.824718	0.638986	0	0	0	0	0	0	0	0
'1'	31	548	556	7.762	10.124	8	2.362	17.715	0	0.572886	0.82962	1	0.659241	0.756892	0	0	0	0	0	0	0	0
'1'	33	584	592	0	14.151	8	14.151	106.132	0	1.3528	0.986669	1	0.973338	1.1631	0	0	0	0	0	0	0	0		29.6243		26.0933
'2'	2	28	48	12.176	0	20	12.176	0	36.528	6.67958	0.946764	4	0.933455	1.29224	3	0.459184	8	1.29032	104	124	54.0323	0.530592
'2'	3	48	76	0	11.927	28	11.927	25.5579	0	30.3668	0.83301	6	0.805178	2.2497	0	0	0	0	0	0	0	0
'2'	4	76	84	11.927	6.801	8	5.126	0	38.445	0.387096	0.971379	1	0.942759	0.62217	0	0	0	0	0	0	0	0
'2'	6	112	140	14.765	0	28	14.765	0	31.6393	10.7658	0.940762	6	0.930889	1.33951	0	0	0	0	0	0	0	0
'2'	10	160	168	6	0	8	6	0	45	0.435243	0.976391	1	0.952781	0.659729	0	0	0	0	0	0	0	0
'2'	12	208	220	15	4.528	12	10.472	0	52.36	1.62011	0.972471	2	0.958706	0.90003	0	0	0	0	0	0	0	0
'2'	13	220	260	4.528	20.23	40	15.702	23.553	0	36.0482	0.839294	9	0.821438	2.00134	0	0	0	0	0	0	0	0
'2'	16	316	324	5.852	0	8	5.852	0	43.89	1.20602	0.934202	1	0.868403	1.09819	0	0	0	0	0	0	0	0
'2'	20	372	396	18.035	0	24	18.035	0	45.0875	48.3246	0.850305	5	0.820366	3.10884	0	0	0	0	0	0	0	0
'2'	24	472	488	12.093	2.693	16	9.4	0	35.25	18.3312	0.815003	3	0.753338	2.47192	0	0	0	0	0	0	0	0
'2'	25	488	524	2.693	14.213	36	11.52	19.2	0	8.53516	0.947262	8	0.940669	1.03291	0	0	0	0	0	0	0	0		22.7703		41.025
'3'	1	40	56	7	17.393	16	10.393	38.9738	0	5.5003	0.93872	3	0.918293	1.35404	9	1.84932	9	1.60714	256	212	14.5985	0.522972
'3'	3	72	80	14.577	23.049	8	8.472	63.54	0	5.15968	0.874298	1	0.748597	2.27149	0	0	0	0	0	0	0	0
'3'	4	80	112	23.049	4.924	32	18.125	0	33.9844	40.935	0.905338	7	0.891815	2.41824	0	0	0	0	0	0	0	0
'3'	5	112	136	4.924	15.532	24	10.608	26.52	0	23.3181	0.835887	5	0.803064	2.15954	0	0	0	0	0	0	0	0
'3'	6	136	148	15.532	7.28	12	8.252	0	41.26	6.01601	0.829191	2	0.743786	1.73436	0	0	0	0	0	0	0	0
'3'	7	148	168	7.28	25.11	20	17.83	53.49	0	19.8985	0.910781	4	0.888476	2.23038	0	0	0	0	0	0	0	0
'3'	8	168	196	25.11	7	28	18.11	0	38.8071	33.8163	0.869119	6	0.847305	2.37404	0	0	0	0	0	0	0	0
'3'	10	232	256	22.051	11.927	24	10.124	0	25.31	20.0539	0.828862	5	0.794634	2.00269	0	0	0	0	0	0	0	0
'3'	11	256	272	11.927	23.505	16	11.578	43.4175	0	3.01771	0.959386	3	0.945847	1.00295	0	0	0	0	0	0	0	0
'3'	12	272	300	23.505	4	28	19.505	0	41.7964	24.0449	0.934933	6	0.924088	2.00187	0	0	0	0	0	0	0	0
'3'	13	300	360	4	30.22	60	26.22	26.22	0	67.8314	0.943402	14	0.939359	2.20116	0	0	0	0	0	0	0	0
'3'	14	360	412	30.22	7.433	52	22.787	0	26.2927	95.6591	0.925076	12	0.918832	2.8234	0	0	0	0	0	0	0	0
'3'	15	412	424	7.433	12.659	12	5.226	26.13	0	0.129262	0.991172	2	0.986758	0.254227	0	0	0	0	0	0	0	0
'3'	16	424	440	12.659	0	16	12.659	0	47.4712	5.64402	0.954562	3	0.939416	1.37162	0	0	0	0	0	0	0	0
'3'	20	468	476	5.59	0	8	5.59	0	41.925	1.11802	0.933221	1	0.866442	1.05736	0	0	0	0	0	0	0	0
'3'	21	476	520	0	15.89	44	15.89	21.6682	0	15.1229	0.950797	10	0.945877	1.22975	0	0	0	0	0	0	0	0
'3'	22	520	532	15.89	6.103	12	9.787	0	48.935	8.21653	0.879497	2	0.819246	2.02689	0	0	0	0	0	0	0	0
'3'	23	532	588	6.103	19.698	56	13.595	14.5661	0	67.8218	0.836486	13	0.823908	2.28409	0	0	0	0	0	0	0	0		34.9473		38.4202
'4'	1	8	48	26.405	0	40	26.405	0	39.6075	63.7816	0.935399	9	0.928221	2.66211	7	1.2963	6	0.857143	248	152	30.0699	0.372447
'4'	2	48	76	0	7.5	28	7.5	16.0714	0	7.65798	0.882531	6	0.862953	1.12975	0	0	0	0	0	0	0	0
'4'	6	88	124	4.95	19.32	36	14.37	23.95	0	29.9132	0.9092	8	0.89785	1.93369	0	0	0	0	0	0	0	0
'4'	7	124	136	19.32	9.708	12	9.612	0	48.06	0.261317	0.99488	2	0.99232	0.361467	0	0	0	0	0	0	0	0
'4'	13	192	232	15	3.354	40	11.646	0	17.469	63.7129	0.844323	9	0.827026	2.66068	0	0	0	0	0	0	0	0
'4'	15	252	264	11.402	4.717	12	6.685	0	33.425	0.308851	0.986941	2	0.980411	0.39297	0	0	0	0	0	0	0	0
'4'	16	264	300	4.717	14.705	36	9.988	16.6467	0	5.64164	0.947136	8	0.940528	0.839764	0	0	0	0	0	0	0	0
'4'	17	300	324	14.705	6	24	8.705	0	21.7625	6.37471	0.887969	5	0.865562	1.12913	0	0	0	0	0	0	0	0
'4'	18	324	340	6	8.5	16	2.5	9.375	0	0.622138	0.833614	3	0.778152	0.455389	0	0	0	0	0	0	0	0
'4'	22	392	444	2.5	19.449	52	16.949	19.5565	0	25.8104	0.926482	12	0.920355	1.46658	0	0	0	0	0	0	0	0
'4'	24	476	524	6.021	22.091	48	16.07	20.0875	0	26.0829	0.93553	11	0.929669	1.53986	0	0	0	0	0	0	0	0
'4'	25	524	548	22.091	12.021	24	10.07	0	25.175	19.8733	0.839298	5	0.807158	1.99365	0	0	0	0	0	0	0	0
'4'	26	548	580	12.021	20.5	32	8.479	15.8981	0	5.49073	0.937073	7	0.928083	0.885658	0	0	0	0	0	0	0	0		17.3693		30.9165
'5'	1	12	44	4.031	16.711	32	12.68	23.775	0	12.3869	0.931177	7	0.921345	1.33025	8	1.96721	4	0.560748	320	136	19.1489	0.374978
'5'	2	44	72	16.711	4.272	28	12.439	0	26.655	20.3637	0.906988	6	0.891486	1.84227	0	0	0	0	0	0	0	0
'5'	5	92	140	5.657	25.544	48	19.887	24.8588	0	44.6279	0.916613	11	0.909032	2.01422	0	0	0	0	0	0	0	0
'5'	6	140	188	25.544	6.727	48	18.817	0	23.5212	90.3631	0.823671	11	0.807641	2.86615	0	0	0	0	0	0	0	0
'5'	10	224	236	3.64	6.576	12	2.936	14.68	0	0.410925	0.909733	2	0.8646	0.45328	0	0	0	0	0	0	0	0
'5'	11	236	304	6.576	21.29	68	14.714	12.9829	0	26.3985	0.951062	16	0.948003	1.28449	0	0	0	0	0	0	0	0
'5'	12	304	328	21.29	3	24	18.29	0	45.725	4.57071	0.983669	5	0.980402	0.956108	0	0	0	0	0	0	0	0
'5'	13	328	364	3	14.318	36	11.318	18.8633	0	14.6189	0.913433	8	0.902612	1.3518	0	0	0	0	0	0	0	0
'5'	15	392	436	7.433	20.518	44	13.085	17.8432	0	19.8324	0.914768	10	0.906245	1.40827	0	0	0	0	0	0	0	0
'5'	17	460	508	14.009	28.43	48	14.421	18.0263	0	40.5633	0.830796	11	0.815414	1.92031	0	0	0	0	0	0	0	0
'5'	18	508	544	28.43	3.536	36	24.894	0	41.49	31.1514	0.960459	8	0.955516	1.9733	0	0	0	0	0	0	0	0
'5'	19	544	576	3.536	11.045	32	7.509	14.0794	0	12.9179	0.800343	7	0.771821	1.35846	0	0	0	0	0	0	0	0		18.1386		34.3478
'6'	1	8	44	28.284	2.55	36	25.734	0	42.89	48.1822	0.953223	8	0.947376	2.45414	5	0.903614	5	0.833333	252	224	18.4932	0.45637
'6'	2	44	76	2.55	20.248	32	17.698	33.1838	0	33.9439	0.901906	7	0.887893	2.20208	0	0	0	0	0	0	0	0
'6'	3	76	88	20.248	24.885	12	4.637	23.185	0	1.76702	0.889586	2	0.83438	0.939951	0	0	0	0	0	0	0	0
'6'	6	124	164	30.647	45.61	40	14.963	22.4445	0	36.7311	0.869396	9	0.854884	2.02021	0	0	0	0	0	0	0	0
'6'	7	164	204	45.61	23.345	40	22.265	0	33.3975	37.951	0.952955	9	0.947728	2.05348	0	0	0	0	0	0	0	0
'6'	8	204	300	23.345	49.041	96	25.696	16.06	0	78.5934	0.950955	23	0.948823	1.84854	0	0	0	0	0	0	0	0
'6'	9	300	388	49.041	4.031	88	45.01	0	30.6886	87.9117	0.982164	21	0.981315	2.04604	0	0	0	0	0	0	0	0
'6'	10	388	460	4.031	28.849	72	24.818	20.6817	0	77.5636	0.935553	17	0.931762	2.13602	0	0	0	0	0	0	0	0
'6'	11	460	500	28.849	7.211	40	21.638	0	32.457	14.7313	0.978276	9	0.975862	1.27938	0	0	0	0	0	0	0	0
'6'	17	572	592	14.773	0	20	14.773	0	44.319	13.0099	0.93208	4	0.9151	1.80346	0	0	0	0	0	0	0	0		23.111		36.7504
'7'	4	80	100	9.192	3.905	20	5.287	0	15.861	2.82439	0.888809	4	0.861011	0.840296	6	1.18421	8	1.79104	152	188	25.4386	0.382471
'7'	5	100	156	3.905	29.262	56	25.357	27.1682	0	44.7381	0.956893	13	0.953578	1.8551	0	0	0	0	0	0	0	0
'7'	6	156	168	29.262	17.088	12	12.174	0	60.87	9.63073	0.913242	2	0.869863	2.19439	0	0	0	0	0	0	0	0
'7'	8	192	248	23.033	4.61	56	18.423	0	19.7389	32.659	0.942429	13	0.938001	1.585	0	0	0	0	0	0	0	0
'7'	14	280	312	12.53	6.185	32	6.345	0	11.8969	8.57028	0.859045	7	0.838908	1.10649	0	0	0	0	0	0	0	0
'7'	17	320	360	5.523	12.748	40	7.225	10.8375	0	22.6419	0.802552	9	0.780613	1.58612	0	0	0	0	0	0	0	0
'7'	18	360	372	12.748	9.014	12	3.734	0	18.67	0.0059967	0.999232	2	0.998848	0.0547572	0	0	0	0	0	0	0	0
'7'	19	372	388	9.014	14.765	16	5.751	21.5663	0	3.28429	0.888738	3	0.851651	1.04631	0	0	0	0	0	0	0	0
'7'	23	416	436	7.81	15.692	20	7.882	23.646	0	7.01963	0.836867	4	0.796084	1.32473	0	0	0	0	0	0	0	0
'7'	24	436	468	15.692	1.581	32	14.111	0	26.4581	38.9804	0.850283	7	0.828895	2.35979	0	0	0	0	0	0	0	0
'7'	25	468	480	1.581	9.124	12	7.543	37.715	0	1.4125	0.961687	2	0.942531	0.840386	0	0	0	0	0	0	0	0
'7'	26	480	496	9.124	3.536	16	5.588	0	20.955	1.30571	0.945096	3	0.926795	0.659724	0	0	0	0	0	0	0	0
'7'	28	520	528	11.236	15.435	8	4.199	31.4925	0	1.0292	0.895459	1	0.790919	1.0145	0	0	0	0	0	0	0	0
'7'	29	528	536	15.435	9.014	8	6.421	0	48.1575	2.92183	0.875859	1	0.751719	1.70934	0	0	0	0	0	0	0	0		25.4042		27.8259
'8'	1	12	40	26.856	5.148	28	21.708	0	46.5171	62.4136	0.90377	6	0.887731	3.22525	9	1.82432	7	0.990566	276	148	25.8741	0.55204
'8'	2	40	88	5.148	24.622	48	19.474	24.3425	0	21.7085	0.950763	11	0.946287	1.40481	0	0	0	0	0	0	0	0
'8'	3	88	104	24.622	5	16	19.622	0	73.5825	20.5537	0.938513	3	0.918017	2.61749	0	0	0	0	0	0	0	0
'8'	4	104	180	5	38.471	76	33.471	26.4245	0	41.8934	0.975271	18	0.973898	1.52558	0	0	0	0	0	0	0	0
'8'	5	180	220	38.471	7.906	40	30.565	0	45.8475	128.512	0.92369	9	0.915211	3.77877	0	0	0	0	0	0	0	0
'8'	6	220	232	7.906	21.57	12	13.664	68.32	0	15.9583	0.89024	2	0.83536	2.82474	0	0	0	0	0	0	0	0
'8'	8	248	260	15.66	12.748	12	2.912	0	14.56	0.143265	0.971422	2	0.957133	0.267642	0	0	0	0	0	0	0	0
'8'	10	296	328	0	15.264	32	15.264	28.62	0	25.7015	0.894707	7	0.879665	1.91615	0	0	0	0	0	0	0	0
'8'	12	336	352	2.062	8.902	16	6.84	25.65	0	0.492464	0.982034	3	0.976046	0.40516	0	0	0	0	0	0	0	0
'8'	18	400	408	6.727	12.01	8	5.283	39.6225	0	0.0655215	0.995327	1	0.990654	0.255972	0	0	0	0	0	0	0	0
'8'	19	408	428	12.01	2	20	10.01	0	30.03	9.44925	0.893722	4	0.867153	1.53698	0	0	0	0	0	0	0	0
'8'	20	428	464	2	20.156	36	18.156	30.26	0	59.202	0.845036	8	0.825666	2.72034	0	0	0	0	0	0	0	0
'8'	22	464	476	20.156	15.7	12	4.456	0	22.28	0.717967	0.932772	2	0.899158	0.599153	0	0	0	0	0	0	0	0
'8'	26	516	556	7.071	23.431	40	16.36	24.54	0	25.8453	0.912391	9	0.902656	1.69461	0	0	0	0	0	0	0	0
'8'	27	556	576	23.431	11.715	20	11.716	0	35.148	9.06961	0.904646	4	0.880807	1.50579	0	0	0	0	0	0	0	0
'8'	28	576	584	11.715	16.279	8	4.564	34.23	0	0.168673	0.984063	1	0.968126	0.410698	0	0	0	0	0	0	0	0		33.5566		38.2807
'9'	1	8	24	8.016	19.5	16	11.484	43.065	0	25.5138	0.827536	3	0.770048	2.91627	8	1.23711	6	0.873786	168	144	43.8849	0.517724
'9'	2	24	48	19.5	10	24	9.5	0	23.75	14.3184	0.850492	5	0.82059	1.69224	0	0	0	0	0	0	0	0
'9'	6	60	88	12.093	1.581	28	10.512	0	22.5257	19.7852	0.866426	6	0.844164	1.81591	0	0	0	0	0	0	0	0
'9'	7	88	108	1.581	18.337	20	16.756	50.268	0	21.9069	0.889547	4	0.861934	2.34024	0	0	0	0	0	0	0	0
'9'	8	108	124	18.337	2.915	16	15.422	0	57.8325	10.5638	0.938794	3	0.918392	1.8765	0	0	0	0	0	0	0	0
'9'	12	164	192	17.847	6.5	28	11.347	0	24.315	42.2307	0.810675	6	0.77912	2.65301	0	0	0	0	0	0	0	0
'9'	13	192	216	6.5	11.597	24	5.097	12.7425	0	3.56409	0.816067	5	0.779281	0.844286	0	0	0	0	0	0	0	0
'9'	17	244	272	4.031	19.704	28	15.673	33.585	0	15.9637	0.916696	6	0.902812	1.63114	0	0	0	0	0	0	0	0
'9'	18	272	308	19.704	3	36	16.704	0	27.84	34.8535	0.906226	8	0.894504	2.08727	0	0	0	0	0	0	0	0
'9'	21	356	368	3.905	15.652	12	11.747	58.735	0	1.42612	0.982997	2	0.974495	0.844428	0	0	0	0	0	0	0	0
'9'	23	404	432	3.536	18.901	28	15.365	32.925	0	5.73594	0.973265	6	0.96881	0.977747	0	0	0	0	0	0	0	0
'9'	25	432	444	18.901	10.062	12	8.839	0	44.195	3.17229	0.923059	2	0.884588	1.25942	0	0	0	0	0	0	0	0
'9'	31	504	512	5.59	8.139	8	2.549	19.1175	0	0.376502	0.896143	1	0.792287	0.613597	0	0	0	0	0	0	0	0
'9'	35	532	564	5.59	16.125	32	10.535	19.7531	0	12.2463	0.917657	7	0.905894	1.32268	0	0	0	0	0	0	0	0		33.7739		33.4097
'10'	1	16	36	11.068	0	20	11.068	0	33.204	17.6713	0.884821	4	0.856026	2.10186	3	0.45	6	0.947368	96	116	57.2581	0.556448
'10'	3	84	92	16.643	2.5	8	14.143	0	106.073	1.31695	0.987003	1	0.974006	1.14759	0	0	0	0	0	0	0	0
'10'	6	132	144	0	10.198	12	10.198	50.99	0	7.82077	0.898301	2	0.847452	1.97747	0	0	0	0	0	0	0	0
'10'	8	168	184	2	12.042	16	10.042	37.6575	0	8.29311	0.842775	3	0.790366	1.66264	0	0	0	0	0	0	0	0
'10'	9	184	196	12.042	0	12	12.042	0	60.21	3.14542	0.963416	2	0.945124	1.25408	0	0	0	0	0	0	0	0
'10'	11	228	248	7.28	0	20	7.28	0	21.84	4.05275	0.930028	4	0.912535	1.00657	0	0	0	0	0	0	0	0
'10'	13	288	304	15.652	1.5	16	14.152	0	53.07	4.05438	0.973373	3	0.964497	1.16252	0	0	0	0	0	0	0	0
'10'	20	396	464	0	21.8	68	21.8	19.2353	0	114.036	0.912889	16	0.907444	2.66969	0	0	0	0	0	0	0	0
'10'	23	472	512	18.742	1.5	40	17.242	0	25.863	191.063	0.810576	9	0.789528	4.60752	0	0	0	0	0	0	0	0		35.9609		50.0433
'11'	1	24	44	26.856	8.746	20	18.11	0	54.33	39.2712	0.898824	4	0.87353	3.13334	7	1.45833	5	0.735294	240	120	31.8182	0.597617
'11'	2	44	88	8.746	26.005	44	17.259	23.535	0	32.4925	0.895312	10	0.884844	1.80257	0	0	0	0	0	0	0	0
'11'	10	140	180	11.18	30.48	40	19.3	28.95	0	49.8379	0.905456	9	0.894951	2.3532	0	0	0	0	0	0	0	0
'11'	13	180	228	30.48	8.201	48	22.279	0	27.8487	72.7376	0.896317	11	0.886892	2.57148	0	0	0	0	0	0	0	0
'11'	14	228	252	8.201	21.006	24	12.805	32.0125	0	32.1258	0.826775	5	0.79213	2.53479	0	0	0	0	0	0	0	0
'11'	20	336	364	36.418	55.301	28	18.883	40.4636	0	25.3636	0.939162	6	0.929022	2.05603	0	0	0	0	0	0	0	0
'11'	21	364	388	55.301	11.853	24	43.448	0	108.62	72.0508	0.955519	5	0.946622	3.79607	0	0	0	0	0	0	0	0
'11'	22	388	416	11.853	19.506	28	7.653	16.3993	0	13.4568	0.833992	6	0.806324	1.4976	0	0	0	0	0	0	0	0
'11'	23	416	424	19.506	12.093	8	7.413	0	55.5975	3.08884	0.898942	1	0.797885	1.75751	0	0	0	0	0	0	0	0
'11'	26	456	468	10.77	19.799	12	9.029	45.145	0	4.20745	0.903271	2	0.854906	1.45042	0	0	0	0	0	0	0	0
'11'	27	468	488	19.799	0	20	19.799	0	59.397	23.8957	0.938049	4	0.922562	2.44416	0	0	0	0	0	0	0	0
'11'	28	488	552	0	19.164	64	19.164	17.9662	0	48.167	0.930323	15	0.925678	1.79196	0	0	0	0	0	0	0	0		29.2102		61.1587
'12'	1	12	44	4.123	10.92	32	6.797	12.7444	0	2.2095	0.954489	7	0.947987	0.561821	6	1.21622	4	0.526316	284	124	29.6552	0.400635
'12'	2	44	64	10.92	5.5	20	5.42	0	16.26	8.71466	0.807156	4	0.758944	1.47603	0	0	0	0	0	0	0	0
'12'	3	64	80	5.5	11.927	16	6.427	24.1013	0	0.825291	0.973225	3	0.9643	0.524497	0	0	0	0	0	0	0	0
'12'	7	120	236	3	36.09	116	33.09	17.1155	0	117.987	0.948683	28	0.94685	2.05276	0	0	0	0	0	0	0	0
'12'	8	236	292	36.09	0	56	36.09	0	38.6679	27.0387	0.985902	13	0.984818	1.44219	0	0	0	0	0	0	0	0
'12'	9	292	316	0	6.946	24	6.946	17.365	0	7.4927	0.876152	5	0.851382	1.22415	0	0	0	0	0	0	0	0
'12'	15	436	492	30.7	46.53	56	15.83	16.9607	0	67.0646	0.908	13	0.900923	2.2713	0	0	0	0	0	0	0	0
'12'	16	492	532	46.53	4.5	40	42.03	0	63.045	145.565	0.945692	9	0.939657	4.02167	0	0	0	0	0	0	0	0
'12'	18	544	552	8.944	5	8	3.944	0	29.58	0.141681	0.982109	1	0.964219	0.376405	0	0	0	0	0	0	0	0
'12'	19	552	592	5	11.885	40	6.885	10.3275	0	3.82813	0.939215	9	0.932461	0.652187	0	0	0	0	0	0	0	0		16.4357		36.8882
'13'	1	8	36	38.737	16.028	28	22.709	0	48.6621	48.659	0.935047	6	0.924222	2.84778	6	1.52542	8	1.25	348	200	6.16438	0.59513
'13'	3	36	44	16.028	13.679	8	2.349	0	17.6175	0.0360375	0.987106	1	0.974212	0.189835	0	0	0	0	0	0	0	0
'13'	6	60	116	17.941	40.267	56	22.326	23.9207	0	94.597	0.896557	13	0.8886	2.69753	0	0	0	0	0	0	0	0
'13'	9	116	156	40.267	0	40	40.267	0	60.4005	24.6582	0.988415	9	0.987127	1.65523	0	0	0	0	0	0	0	0
'13'	10	156	268	0	36.015	112	36.015	19.2937	0	102.671	0.969757	27	0.968637	1.95003	0	0	0	0	0	0	0	0
'13'	11	268	296	36.015	4.014	28	32.001	0	68.5736	63.357	0.932445	6	0.921186	3.24954	0	0	0	0	0	0	0	0
'13'	12	296	328	4.014	20.072	32	16.058	30.1088	0	4.50705	0.981096	7	0.978395	0.802411	0	0	0	0	0	0	0	0
'13'	13	328	340	20.072	4.269	12	15.803	0	79.015	0.289829	0.997884	2	0.996826	0.380676	0	0	0	0	0	0	0	0
'13'	14	340	372	4.269	18.135	32	13.866	25.9988	0	24.4638	0.908172	7	0.895053	1.86945	0	0	0	0	0	0	0	0
'13'	15	372	380	18.135	14.621	8	3.514	0	26.355	1.06513	0.852867	1	0.705734	1.03205	0	0	0	0	0	0	0	0
'13'	18	400	476	17.133	57.009	76	39.876	31.4811	0	134.711	0.95928	18	0.957018	2.73568	0	0	0	0	0	0	0	0
'13'	19	476	516	57.009	5.831	40	51.178	0	76.767	132.918	0.957916	9	0.953241	3.84301	0	0	0	0	0	0	0	0
'13'	20	516	556	5.831	18	40	12.169	18.2535	0	20.1419	0.845921	9	0.828802	1.49599	0	0	0	0	0	0	0	0
'13'	23	556	592	18	0	36	18	0	30	148.152	0.822405	8	0.800205	4.30337	0	0	0	0	0	0	0	0		24.8428		50.9238
'14'	2	40	48	8.393	2.687	8	5.706	0	42.795	0.428803	0.974336	1	0.948671	0.65483	8	1.96721	5	0.675676	288	88	29.3233	0.473561
'14'	3	48	88	2.687	12.737	40	10.05	15.075	0	31.943	0.818834	9	0.798704	1.88394	0	0	0	0	0	0	0	0
'14'	4	88	112	12.737	5.667	24	7.07	0	17.675	7.26341	0.815317	5	0.778381	1.20527	0	0	0	0	0	0	0	0
'14'	7	112	120	5.667	10.154	8	4.487	33.6525	0	0.0122402	0.998786	1	0.997571	0.110635	0	0	0	0	0	0	0	0
'14'	11	156	188	3.162	16.786	32	13.624	25.545	0	9.34571	0.936731	7	0.927693	1.15547	0	0	0	0	0	0	0	0
'14'	12	188	208	16.786	2.687	20	14.099	0	42.297	7.12019	0.953052	4	0.941315	1.33418	0	0	0	0	0	0	0	0
'14'	17	272	320	19.394	34.262	48	14.868	18.585	0	29.8645	0.924609	11	0.917756	1.64771	0	0	0	0	0	0	0	0
'14'	18	320	348	34.262	3.162	28	31.1	0	66.6429	33.7125	0.966806	6	0.961273	2.37039	0	0	0	0	0	0	0	0
'14'	19	348	404	3.162	12.966	56	9.804	10.5043	0	39.7049	0.825825	13	0.812427	1.74763	0	0	0	0	0	0	0	0
'14'	23	452	500	2.236	17.92	48	15.684	19.605	0	25.2731	0.91407	11	0.906258	1.51577	0	0	0	0	0	0	0	0
'14'	25	500	508	17.92	5.897	8	12.023	0	90.1725	3.62393	0.952254	1	0.904508	1.90366	0	0	0	0	0	0	0	0
'14'	27	508	520	5.897	20.377	12	14.48	72.4	0	12.7479	0.907609	2	0.861413	2.52467	0	0	0	0	0	0	0	0
'14'	29	528	572	14.395	39.459	44	25.064	34.1782	0	72.3002	0.9372	10	0.93092	2.68887	0	0	0	0	0	0	0	0		28.6931		51.9165
'15'	2	24	76	27.346	55.065	52	27.719	31.9835	0	169.614	0.902029	12	0.893865	3.75959	4	1.33333	5	1.25	232	172	1.94175	0.627369
'15'	3	76	100	55.065	17.333	24	37.732	0	94.33	99.3794	0.942373	5	0.930848	4.45824	0	0	0	0	0	0	0	0
'15'	4	100	136	17.333	40.672	36	23.339	38.8983	0	13.9033	0.973016	8	0.969643	1.3183	0	0	0	0	0	0	0	0
'15'	5	136	180	40.672	1.667	44	39.005	0	53.1886	76.3716	0.970418	10	0.96746	2.76354	0	0	0	0	0	0	0	0
'15'	6	180	264	1.667	40.863	84	39.196	27.9971	0	96.9091	0.971534	20	0.970111	2.20124	0	0	0	0	0	0	0	0
'15'	7	264	300	40.863	3.902	36	36.961	0	61.6017	118.067	0.946319	8	0.939609	3.84166	0	0	0	0	0	0	0	0
'15'	8	300	360	3.902	26.585	60	22.683	22.683	0	66.9534	0.930306	14	0.925328	2.18687	0	0	0	0	0	0	0	0
'15'	9	360	384	26.585	9.481	24	17.104	0	42.76	45.9941	0.891161	5	0.869393	3.03296	0	0	0	0	0	0	0	0
'15'	11	392	436	9.718	0	44	9.718	0	13.2518	11.4453	0.91771	10	0.909481	1.06983	0	0	0	0	0	0	0	0		30.3905		53.0264
'16'	1	28	52	19.396	0	24	19.396	0	48.49	18.109	0.952842	5	0.94341	1.9031	7	1.66667	7	1.06061	312	168	14.8936	0.555904
'16'	2	52	128	0	35.54	76	35.54	28.0579	0	79.4487	0.970316	18	0.968666	2.10091	0	0	0	0	0	0	0	0
'16'	3	128	180	35.54	7.696	52	27.844	0	32.1277	161.778	0.89694	12	0.888352	3.67172	0	0	0	0	0	0	0	0
'16'	4	180	220	7.696	17.695	40	9.999	14.9985	0	23.2277	0.895649	9	0.884054	1.6065	0	0	0	0	0	0	0	0
'16'	5	220	244	17.695	3.727	24	13.968	0	34.92	11.8206	0.941039	5	0.929247	1.53757	0	0	0	0	0	0	0	0
'16'	9	292	308	15.232	6.839	16	8.393	0	31.4737	7.97835	0.807463	3	0.743284	1.63078	0	0	0	0	0	0	0	0
'16'	10	308	352	6.839	24.278	44	17.439	23.7805	0	15.4725	0.965404	10	0.961945	1.24388	0	0	0	0	0	0	0	0
'16'	15	372	392	22.01	8.246	20	13.764	0	41.292	23.5244	0.883605	4	0.854506	2.4251	0	0	0	0	0	0	0	0
'16'	16	392	416	8.246	14.181	24	5.935	14.8375	0	1.38137	0.951868	5	0.942242	0.525617	0	0	0	0	0	0	0	0
'16'	20	432	476	13.679	39.127	44	25.448	34.7018	0	49.2379	0.931598	10	0.924758	2.21896	0	0	0	0	0	0	0	0
'16'	21	476	488	39.127	21.922	12	17.205	0	86.025	37.8155	0.852928	2	0.779392	4.34831	0	0	0	0	0	0	0	0
'16'	22	488	520	21.922	42.005	32	20.083	37.6556	0	15.4783	0.951359	7	0.944411	1.487	0	0	0	0	0	0	0	0
'16'	23	520	540	42.005	21.2	20	20.805	0	62.415	52.7441	0.812644	4	0.765804	3.63126	0	0	0	0	0	0	0	0
'16'	24	540	592	21.2	52.215	52	31.015	35.7865	0	223.741	0.855598	12	0.843565	4.318	0	0	0	0	0	0	0	0		27.1169		48.1062
'17'	1	20	52	13.569	4.667	32	8.902	0	16.6913	33.5121	0.808981	7	0.781693	2.18802	5	0.728155	7	1.02941	124	128	52.9851	0.492456
'17'	6	124	148	6.227	14.735	24	8.508	21.27	0	15.152	0.843013	5	0.811616	1.74081	0	0	0	0	0	0	0	0
'17'	12	248	256	12.12	11.324	8	0.796	0	5.97	0.00680067	0.978985	1	0.95797	0.0824662	0	0	0	0	0	0	0	0
'17'	13	256	268	11.324	15.962	12	4.638	23.19	0	2.07839	0.876399	2	0.814599	1.01941	0	0	0	0	0	0	0	0
'17'	15	268	276	15.962	8.34	8	7.622	0	57.165	0.206091	0.992955	1	0.98591	0.453972	0	0	0	0	0	0	0	0
'17'	17	308	332	17.088	1.374	24	15.714	0	39.285	16.636	0.938223	5	0.925868	1.82406	0	0	0	0	0	0	0	0
'17'	18	332	376	1.374	10.75	44	9.376	12.7855	0	7.66748	0.933853	10	0.927239	0.875641	0	0	0	0	0	0	0	0
'17'	21	392	404	10.541	7.81	12	2.731	0	13.655	0.746834	0.836036	2	0.754054	0.611079	0	0	0	0	0	0	0	0
'17'	22	404	440	7.81	25.414	36	17.604	29.34	0	29.3667	0.924729	8	0.91532	1.91594	0	0	0	0	0	0	0	0
'17'	23	440	468	25.414	2.539	28	22.875	0	49.0179	69.3508	0.878554	6	0.858313	3.39977	0	0	0	0	0	0	0	0
'17'	30	532	540	0	14.61	8	14.61	109.575	0	0.818443	0.99239	1	0.984779	0.904678	0	0	0	0	0	0	0	0
'17'	31	540	556	14.61	3.887	16	10.723	0	40.2112	10.4934	0.898135	3	0.86418	1.87024	0	0	0	0	0	0	0	0		39.2321		31.7136
'18'	2	28	40	42.133	37.643	12	4.49	0	22.45	2.66504	0.820199	2	0.730298	1.15435	7	1.56716	7	1.23529	252	180	16.9231	0.529433
'18'	7	56	104	41.56	6.227	48	35.333	0	44.1662	158.067	0.929624	11	0.923226	3.79074	0	0	0	0	0	0	0	0
'18'	8	104	160	6.227	22.284	56	16.057	17.2039	0	35.511	0.885592	13	0.876792	1.65276	0	0	0	0	0	0	0	0
'18'	9	160	176	22.284	3.902	16	18.382	0	68.9325	10.1263	0.961512	3	0.948683	1.83724	0	0	0	0	0	0	0	0
'18'	10	176	212	3.902	15.538	36	11.636	19.3933	0	28.8631	0.863691	8	0.846652	1.89944	0	0	0	0	0	0	0	0
'18'	13	212	220	15.538	7.782	8	7.756	0	58.17	0.141067	0.995332	1	0.990664	0.375588	0	0	0	0	0	0	0	0
'18'	14	220	232	7.782	13.828	12	6.046	30.23	0	4.96852	0.84276	2	0.764139	1.57615	0	0	0	0	0	0	0	0
'18'	19	284	304	9.989	0	20	9.989	0	29.967	13.3345	0.81688	4	0.7711	1.82582	0	0	0	0	0	0	0	0
'18'	20	304	340	0	18.487	36	18.487	30.8117	0	22.6076	0.942448	8	0.935254	1.68106	0	0	0	0	0	0	0	0
'18'	22	360	384	13.928	25.824	24	11.896	29.74	0	11.9961	0.920612	5	0.904735	1.54894	0	0	0	0	0	0	0	0
'18'	23	384	408	25.824	6.342	24	19.482	0	48.705	12.0511	0.968488	5	0.962186	1.55249	0	0	0	0	0	0	0	0
'18'	24	408	480	6.342	33.121	72	26.779	22.3158	0	67.7005	0.953912	17	0.951201	1.99559	0	0	0	0	0	0	0	0
'18'	25	480	532	33.121	3.543	52	29.578	0	34.1285	168.707	0.895934	12	0.887262	3.74953	0	0	0	0	0	0	0	0
'18'	26	532	548	3.543	16.347	16	12.804	48.015	0	13.7691	0.898142	3	0.864189	2.14236	0	0	0	0	0	0	0	0		28.2443		43.7885
'19'	3	36	136	4.269	31.34	100	27.071	16.2426	0	165.201	0.933268	24	0.930488	2.62361	8	2.55319	5	0.735294	368	148	7.19424	0.620174
'19'	5	136	188	31.34	48.31	52	16.97	19.5808	0	101.006	0.807257	12	0.791195	2.90123	0	0	0	0	0	0	0	0
'19'	6	188	220	48.31	0	32	48.31	0	90.5812	105.587	0.958142	7	0.952163	3.8838	0	0	0	0	0	0	0	0
'19'	7	220	232	0	13.437	12	13.437	67.185	0	2.56619	0.973906	2	0.960859	1.13274	0	0	0	0	0	0	0	0
'19'	9	248	260	7.318	20.431	12	13.113	65.565	0	3.67432	0.957842	2	0.936763	1.35542	0	0	0	0	0	0	0	0
'19'	10	260	292	20.431	0	32	20.431	0	38.3081	91.0375	0.891673	7	0.876198	3.60629	0	0	0	0	0	0	0	0
'19'	11	292	304	0	14.391	12	14.391	71.955	0	17.4019	0.890959	2	0.836438	2.94974	0	0	0	0	0	0	0	0
'19'	12	304	320	14.391	0	16	14.391	0	53.9663	29.726	0.808699	3	0.744933	3.14781	0	0	0	0	0	0	0	0
'19'	15	344	412	4.333	25.144	68	20.811	18.3626	0	91.529	0.887444	16	0.88041	2.39177	0	0	0	0	0	0	0	0
'19'	16	412	436	25.144	2.357	24	22.787	0	56.9675	3.45229	0.99162	5	0.989944	0.830938	0	0	0	0	0	0	0	0
'19'	17	436	524	2.357	49.739	88	47.382	32.3059	0	122.838	0.975861	21	0.974712	2.41856	0	0	0	0	0	0	0	0
'19'	18	524	568	49.739	13.78	44	35.959	0	49.035	55.078	0.963191	10	0.959511	2.34687	0	0	0	0	0	0	0	0
'19'	19	568	592	13.78	38.737	24	24.957	62.3925	0	84.8922	0.884802	5	0.861762	4.12049	0	0	0	0	0	0	0	0		44.1987		57.7716
'20'	1	20	44	16.75	0	24	16.75	0	41.875	36.7122	0.903152	5	0.883782	2.70969	9	2.36842	8	1.44578	280	176	10.2362	0.470033
'20'	2	44	80	0	7.364	36	7.364	12.2733	0	9.17919	0.853979	8	0.835726	1.07117	0	0	0	0	0	0	0	0
'20'	3	80	92	7.364	0	12	7.364	0	36.82	3.88679	0.899916	2	0.849873	1.39406	0	0	0	0	0	0	0	0
'20'	4	92	148	0	21.615	56	21.615	23.1589	0	41.2248	0.954439	13	0.950935	1.78077	0	0	0	0	0	0	0	0
'20'	5	148	176	21.615	4.333	28	17.282	0	37.0329	41.5444	0.82724	6	0.798447	2.63136	0	0	0	0	0	0	0	0
'20'	6	176	184	4.333	12.405	8	8.072	60.54	0	0.0695527	0.99787	1	0.995739	0.263728	0	0	0	0	0	0	0	0
'20'	7	184	216	12.405	2.333	32	10.072	0	18.885	15.5762	0.889071	7	0.873224	1.4917	0	0	0	0	0	0	0	0
'20'	8	216	224	2.333	6.119	8	3.786	28.395	0	1.40167	0.836418	1	0.672835	1.18392	0	0	0	0	0	0	0	0
'20'	10	224	260	6.119	14.472	36	8.353	13.9217	0	18.0037	0.848862	8	0.82997	1.50015	0	0	0	0	0	0	0	0
'20'	12	260	320	14.472	36.1	60	21.628	21.628	0	151.315	0.9046	14	0.897786	3.28759	0	0	0	0	0	0	0	0
'20'	15	332	372	37.538	7.923	40	29.615	0	44.4225	159.289	0.916705	9	0.90745	4.20699	0	0	0	0	0	0	0	0
'20'	16	372	380	7.923	12.776	8	4.853	36.3975	0	0.495938	0.959587	1	0.919174	0.704228	0	0	0	0	0	0	0	0
'20'	19	420	436	16.707	0	16	16.707	0	62.6512	14.8347	0.926436	3	0.901915	2.22372	0	0	0	0	0	0	0	0
'20'	20	436	472	0	7	36	7	11.6667	0	18.9568	0.808681	8	0.784767	1.53935	0	0	0	0	0	0	0	0
'20'	21	472	480	7	0	8	7	0	52.5	0.00308267	0.999874	1	0.999748	0.0555218	0	0	0	0	0	0	0	0
'20'	22	480	512	0	13.437	32	13.437	25.1944	0	19.8605	0.851108	7	0.829838	1.68441	0	0	0	0	0	0	0	0
'20'	23	512	528	13.437	0	16	13.437	0	50.3888	8.31717	0.938555	3	0.918073	1.66505	0	0	0	0	0	0	0	0		25.9084		43.0719
'21'	2	36	56	5.676	14.682	20	9.006	27.018	0	1.46021	0.977501	4	0.971876	0.604195	7	2.44186	7	1.15385	320	128	8.94309	0.532071
'21'	3	56	68	14.682	7.732	12	6.95	0	34.75	2.86386	0.920058	2	0.880087	1.19663	0	0	0	0	0	0	0	0
'21'	6	80	132	12.481	24.336	52	11.855	13.6788	0	30.0637	0.914062	12	0.906901	1.58282	0	0	0	0	0	0	0	0
'21'	7	132	144	24.336	16.506	12	7.83	0	39.15	5.70704	0.88432	2	0.82648	1.68924	0	0	0	0	0	0	0	0
'21'	8	144	192	16.506	34.913	48	18.407	23.0087	0	18.6928	0.956579	11	0.952632	1.30359	0	0	0	0	0	0	0	0
'21'	9	192	224	34.913	8.028	32	26.885	0	50.4094	61.1418	0.936216	7	0.927104	2.95543	0	0	0	0	0	0	0	0
'21'	11	256	264	19.531	10.382	8	9.149	0	68.6175	0.156493	0.996275	1	0.992549	0.395593	0	0	0	0	0	0	0	0
'21'	12	264	328	10.382	31.002	64	20.62	19.3313	0	23.2577	0.967995	15	0.965862	1.2452	0	0	0	0	0	0	0	0
'21'	13	328	348	31.002	12.494	20	18.508	0	55.524	14.393	0.946965	4	0.933706	1.8969	0	0	0	0	0	0	0	0
'21'	14	348	384	12.494	30.148	36	17.654	29.4233	0	37.8772	0.864294	8	0.847331	2.17593	0	0	0	0	0	0	0	0
'21'	15	384	408	30.148	10.355	24	19.793	0	49.4825	18.8309	0.947356	5	0.936827	1.94066	0	0	0	0	0	0	0	0
'21'	16	408	456	10.355	35.611	48	25.256	31.57	0	110.519	0.891217	11	0.881327	3.16972	0	0	0	0	0	0	0	0
'21'	17	456	476	35.611	10.16	20	25.451	0	76.353	8.82518	0.981262	4	0.976578	1.48536	0	0	0	0	0	0	0	0
'21'	18	476	528	10.16	31.164	52	21.004	24.2354	0	55.3269	0.920147	12	0.913493	2.14723	0	0	0	0	0	0	0	0		24.0379		53.4695
'22'	1	4	24	13.187	4.333	20	8.854	0	26.562	12.2279	0.853695	4	0.817119	1.74842	5	1.20968	5	0.773196	320	180	11.9718	0.470718
'22'	2	24	64	4.333	20.529	40	16.196	24.294	0	30.2876	0.917053	9	0.907837	1.83447	0	0	0	0	0	0	0	0
'22'	3	64	88	20.529	7.333	24	13.196	0	32.99	12.5546	0.932393	5	0.918871	1.58459	0	0	0	0	0	0	0	0
'22'	4	88	136	7.333	28.103	48	20.77	25.9625	0	36.2287	0.895896	11	0.886432	1.8148	0	0	0	0	0	0	0	0
'22'	8	204	284	14.765	35.536	80	20.771	15.5783	0	30.8658	0.971123	19	0.969603	1.27456	0	0	0	0	0	0	0	0
'22'	9	284	328	35.536	3.333	44	32.203	0	43.9132	183.035	0.845178	10	0.829696	4.27825	0	0	0	0	0	0	0	0
'22'	10	328	444	3.333	47.349	116	44.016	22.7669	0	42.1739	0.991858	28	0.991567	1.22728	0	0	0	0	0	0	0	0
'22'	11	444	500	47.349	4.123	56	43.226	0	46.3136	161.016	0.960841	13	0.957829	3.51935	0	0	0	0	0	0	0	0
'22'	12	500	536	4.123	20.125	36	16.002	26.67	0	28.6432	0.907153	8	0.895547	1.8922	0	0	0	0	0	0	0	0
'22'	13	536	572	20.125	0	36	20.125	0	33.5417	63.2453	0.837921	8	0.817661	2.8117	0	0	0	0	0	0	0	0		23.0543		36.6641
'23'	1	8	24	15.391	4.485	16	10.906	0	40.8975	24.5557	0.82385	3	0.765133	2.86099	6	1.47541	6	0.857143	312	136	19.4245	0.440942
'23'	2	24	132	4.485	27.6	108	23.115	12.8417	0	51.1976	0.945053	26	0.94294	1.40326	0	0	0	0	0	0	0	0
'23'	3	132	168	27.6	4.955	36	22.645	0	37.7417	19.5323	0.968866	8	0.964974	1.56254	0	0	0	0	0	0	0	0
'23'	6	188	208	4.714	9.006	20	4.292	12.876	0	0.601163	0.944544	4	0.93068	0.387673	0	0	0	0	0	0	0	0
'23'	9	280	296	13.199	3.333	16	9.866	0	36.9975	4.55359	0.926737	3	0.902315	1.23202	0	0	0	0	0	0	0	0
'23'	10	296	344	3.333	21.375	48	18.042	22.5525	0	32.6587	0.913949	11	0.906126	1.72307	0	0	0	0	0	0	0	0
'23'	11	344	364	21.375	3.59	20	17.785	0	53.355	39.0647	0.893701	4	0.867127	3.12509	0	0	0	0	0	0	0	0
'23'	12	364	372	3.59	8.014	8	4.424	33.18	0	0.0748167	0.992413	1	0.984825	0.273526	0	0	0	0	0	0	0	0
'23'	14	388	404	5	12.53	16	7.53	28.2375	0	0.949798	0.975964	3	0.967951	0.562672	0	0	0	0	0	0	0	0
'23'	15	404	428	12.53	0	24	12.53	0	31.325	22.9048	0.852369	5	0.822843	2.14032	0	0	0	0	0	0	0	0
'23'	16	428	540	0	34.975	112	34.975	18.7366	0	288.64	0.937993	27	0.935696	3.26962	0	0	0	0	0	0	0	0
'23'	17	540	564	34.975	3.543	24	31.432	0	78.58	23.2597	0.975347	5	0.970416	2.15684	0	0	0	0	0	0	0	0		21.404		46.4828
'24'	1	4	28	5.667	14.866	24	9.199	22.9975	0	17.7871	0.832844	5	0.799412	1.88611	8	2.10526	8	1.15385	352	164	11.0345	0.603928
'24'	4	28	36	14.866	10.609	8	4.257	0	31.9275	0.242808	0.973902	1	0.947805	0.492756	0	0	0	0	0	0	0	0
'24'	5	36	68	10.609	20.766	32	10.157	19.0444	0	18.4211	0.893828	7	0.878661	1.62222	0	0	0	0	0	0	0	0
'24'	6	68	80	20.766	23.725	12	2.959	14.795	0	0.880471	0.874436	2	0.811654	0.663503	0	0	0	0	0	0	0	0
'24'	8	96	136	28.178	0	40	28.178	0	42.267	91.2352	0.898778	9	0.887531	3.1839	0	0	0	0	0	0	0	0
'24'	9	136	152	0	9.707	16	9.707	36.4012	0	2.28454	0.9559	3	0.941201	0.872648	0	0	0	0	0	0	0	0
'24'	10	152	168	9.707	5.676	16	4.031	0	15.1163	1.35883	0.871969	3	0.829292	0.67301	0	0	0	0	0	0	0	0
'24'	11	168	180	5.676	9.718	12	4.042	20.21	0	0.115527	0.988314	2	0.982471	0.24034	0	0	0	0	0	0	0	0
'24'	12	180	192	9.718	0	12	9.718	0	48.59	1.81734	0.965956	2	0.948935	0.953241	0	0	0	0	0	0	0	0
'24'	13	192	272	0	44.003	80	44.003	33.0022	0	92.1968	0.976016	19	0.974754	2.20283	0	0	0	0	0	0	0	0
'24'	14	272	300	44.003	0	28	44.003	0	94.2921	15.1912	0.991333	6	0.989888	1.59118	0	0	0	0	0	0	0	0
'24'	15	300	380	0	38.651	80	38.651	28.9883	0	223.797	0.934385	19	0.930932	3.43203	0	0	0	0	0	0	0	0
'24'	16	380	412	38.651	7.134	32	31.517	0	59.0944	23.4689	0.979364	7	0.976415	1.83104	0	0	0	0	0	0	0	0
'24'	17	412	508	7.134	38.8	96	31.666	19.7913	0	95.0988	0.964334	23	0.962783	2.0334	0	0	0	0	0	0	0	0
'24'	18	508	528	38.8	5.935	20	32.865	0	98.595	52.975	0.94871	4	0.935888	3.6392	0	0	0	0	0	0	0	0
'24'	20	576	584	17.77	11.096	8	6.674	0	50.055	0.0235627	0.998943	1	0.997886	0.153501	0	0	0	0	0	0	0	0		24.4037		54.9922
'25'	1	4	36	26.367	3.399	32	22.968	0	43.065	27.1448	0.962292	7	0.956905	1.96922	6	1.42857	8	1.33333	312	204	8.51064	0.612748
'25'	2	36	76	3.399	22.514	40	19.115	28.6725	0	8.11701	0.981009	9	0.978899	0.949679	0	0	0	0	0	0	0	0
'25'	3	76	84	22.514	11.709	8	10.805	0	81.0375	3.76517	0.939408	1	0.878815	1.9404	0	0	0	0	0	0	0	0
'25'	4	84	132	11.709	32.221	48	20.512	25.64	0	6.00112	0.988317	11	0.987254	0.738618	0	0	0	0	0	0	0	0
'25'	5	132	152	32.221	6.872	20	25.349	0	76.047	39.7142	0.927711	4	0.909639	3.15096	0	0	0	0	0	0	0	0
'25'	6	152	200	6.872	25.667	48	18.795	23.4937	0	41.7717	0.933665	11	0.927635	1.9487	0	0	0	0	0	0	0	0
'25'	9	228	256	39.182	12.078	28	27.104	0	58.08	66.8588	0.865482	6	0.843062	3.33813	0	0	0	0	0	0	0	0
'25'	13	264	276	22.395	17.904	12	4.491	0	22.455	1.49511	0.896214	2	0.844321	0.864613	0	0	0	0	0	0	0	0
'25'	14	276	356	17.904	48.178	80	30.274	22.7055	0	137.339	0.9264	19	0.922526	2.68856	0	0	0	0	0	0	0	0
'25'	15	356	388	48.178	14.881	32	33.297	0	62.4319	61.1387	0.94831	7	0.940926	2.95535	0	0	0	0	0	0	0	0
'25'	16	388	424	14.881	38.759	36	23.878	39.7967	0	12.3989	0.97961	8	0.977061	1.24494	0	0	0	0	0	0	0	0
'25'	18	436	496	39.554	67.847	60	28.293	28.293	0	101.295	0.938603	14	0.934217	2.68986	0	0	0	0	0	0	0	0
'25'	20	496	508	67.847	63.64	12	4.207	0	21.035	3.49489	0.801542	2	0.702313	1.32191	0	0	0	0	0	0	0	0
'25'	21	508	568	63.64	16.55	60	47.09	0	47.09	141.882	0.968656	14	0.966417	3.18346	0	0	0	0	0	0	0	0		28.1002		51.4052

## Sheet: V410A
yJM4010									yJM4010																											yJM4011
Imaged on 08.16.19									Imaged on 09.17.19																											Imaged on 10.10.19
																																										**example life plot -- in prism!
Image #013 cell#1			Image #014 cell#1			Image #014 cell#2			Image #0 cell#1			Image #001 cell#1			Image #004 cell#1			Image #005 cell#1			Image #006 cell#1			Image #007 cell#1			Image #009 cell#1			Image #010 cell#1			Image #010 cell#2			Image #002 cell#1			Image #006 cell#1			Image #006 cell#2			Image #007 cell#1			Image #007 cell#2
Time (s)	Length	Length (um)	Time (s)	Length	Length (um)	Time (s)	Length	Length (um)	Time (s)	Length	Length (um)	Time (s)	Length	Length (um)	Time (s)	Length	Length (um)	Time (s)	Length	Length (um)	Time (s)	Length	Length (um)	Time (s)	Length	Length (um)	Time (s)	Length	Length (um)	Time (s)	Length	Length (um)	Time (s)	Length	Length (um)	Time (s)	Length	Length (um)	Time (s)	Length	Length (um)	Time (s)	Length	Length (um)	Time (s)	Length	Length (um)	Time (s)	Length
0	60.811	3.24305	0	15.572	0.830455	0	16.808	0.896371	0	17.613	0.939301	0	19.09	1.01807	0	19.678	1.04943	0	4.346	0.231772	0	3.052	0.162763	0	28.175	1.50257	0	6.289	0.335392	0	39.373	2.09976	0	8.138	0.434	0	33.208	1.77098	0	14.472	0.771792	0	37.646	2.00766	0	26.984	1.43906	0	18.535
4	53.745	2.86622	4	16.279	0.868159	4	12.42	0.662359	4	17.613	0.939301	4	21.932	1.16963	4	22.214	1.18467	4	5.935	0.316514	4	2.358	0.125752	4	29.1	1.5519	4	9.006	0.48029	4	37.169	1.98222	4	15.902	0.848054	4	25.071	1.33704	4	15.366	0.819469	4	37.202	1.98398	4	28.073	1.49713	4	21.084
8	44.822	2.39036	8	12.5	0.666625	8	21.148	1.12782	8	14.926	0.796004	8	22.41	1.19513	8	22.254	1.18681	8	8.498	0.453198	8	0	0	8	30.233	1.61233	8	8.724	0.465251	8	29.105	1.55217	8	17.401	0.927995	8	21.234	1.13241	8	14.682	0.782991	8	34.059	1.81637	8	29.282	1.56161	8	19.607
12	35.725	1.90521	12	13.285	0.708489	12	9.925	0.5293	12	15.118	0.806243	12	25.519	1.36093	12	23.462	1.25123	12	16.75	0.893278	12	0	0	12	32.344	1.72491	12	12.333	0.657719	12	22.023	1.17449	12	18.333	0.977699	12	15.808	0.843041	12	17.208	0.917703	12	31.82	1.69696	12	30.806	1.64288	12	19.105
16	27.659	1.47505	16	5.22	0.278383	16	12.903	0.688117	16	15.723	0.838508	16	26.098	1.39181	16	28.674	1.52918	16	19.692	1.05017	16	0	0	16	33.425	1.78256	16	12.12	0.64636	16	14.97	0.79835	16	17.065	0.910076	16	10.16	0.541833	16	13.308	0.709716	16	27.226	1.45196	16	31.34	1.67136	16	20.894
20	21.57	1.15033	20	5.701	0.304034	20	14.009	0.7471	20	18.382	0.980312	20	29.219	1.55825	20	32.668	1.74218	20	23.781	1.26824	20	10	0.5333	20	33.005	1.76016	20	13.068	0.696916	20	6.667	0.355551	20	13.499	0.719902	20	3.145	0.167723	20	17.695	0.943674	20	28.2	1.50391	20	27.978	1.49207	20	21.401
24	18.795	1.00234	24	3.606	0.192308	24	16.919	0.90229	24	16.68	0.889544	24	27.002	1.44002	24	33.785	1.80175	24	20.336	1.08452	24	11.56	0.616495	24	37.451	1.99726	24	14.016	0.747473	24	6.119	0.326326	24	4.243	0.226279	24	0	0	24	20.71	1.10446	24	9.862	0.52594	24	26.874	1.43319	24	18.187
28	14.773	0.787844	28	1.581	0.0843147	28	18.608	0.992365	28	13.35	0.711955	28	31.207	1.66427	28	33.746	1.79967	28	15.063	0.80331	28	10.527	0.561405	28	39.501	2.10659	28	16.055	0.856213	28	4.807	0.256357	28	1.944	0.103674	28	0	0	28	18.526	0.987992	28	12.5	0.666625	28	25.009	1.33373	28	17.467
32	17.205	0.917543	32	5.025	0.267983	32	14.577	0.777391	32	17.78	0.948207	32	28.032	1.49495	32	33.541	1.78874	32	12.867	0.686197	32	15.415	0.822082	32	41.126	2.19325	32	15.811	0.843201	32	5.385	0.287182	32	0	0	32	2.687	0.143298	32	21.336	1.13785	32	16.325	0.870612	32	21.213	1.13129	32	21.357
36	24.13	1.28685	36	0	0	36	15.305	0.816216	36	17.742	0.946181	36	28.032	1.49495	36	32.472	1.73173	36	16.1	0.858613	36	13.365	0.712755	36	41.966	2.23805	36	8.028	0.428133	36	9.357	0.499009	36	0	0	36	3.667	0.195561	36	18.67	0.995671	36	14.422	0.769125	36	16.576	0.883998	36	20.32
40	27.336	1.45783	40	0	0	40	18.2	0.970606	40	14.757	0.786991	40	21.69	1.15673	40	34.411	1.83514	40	16.003	0.85344	40	16.653	0.888104	40	42.054	2.24274	40	11.005	0.586897	40	9.545	0.509035	40	0	0	40	5.676	0.302701	40	13.387	0.713929	40	16.711	0.891198	40	12.649	0.674571	40	28.79
44	28.04	1.49537	44	9.301	0.496022	44	17.205	0.917543	44	9.171	0.489089	44	15.424	0.822562	44	31.598	1.68512	44	24.608	1.31234	44	19.729	1.05215	44	37.351	1.99193	44	10.349	0.551912	44	13.068	0.696916	44	0	0	44	8.233	0.439066	44	4.216	0.224839	44	17	0.90661	44	17.029	0.908157	44	23.535
48	32.558	1.73632	48	10	0.5333	48	22.655	1.20819	48	2	0.10666	48	15.699	0.837228	48	27.115	1.44604	48	27.019	1.44092	48	22.251	1.18665	48	28.828	1.5374	48	17.052	0.909383	48	13.601	0.725341	48	0	0	48	6.616	0.352831	48	9.69	0.516768	48	20.555	1.0962	48	15.366	0.819469	48	19.849
52	38.108	2.0323	52	11.885	0.633827	52	23.071	1.23038	52	4.014	0.214067	52	18.248	0.973166	52	21.932	1.16963	52	29.853	1.59206	52	24.852	1.32536	52	19.693	1.05023	52	15.67	0.835681	52	12.983	0.692383	52	0	0	52	6.749	0.359924	52	10.006	0.53362	52	17.72	0.945008	52	14.579	0.777498	52	16.506
56	38.733	2.06563	56	11.424	0.609242	56	19.981	1.06559	56	2.667	0.142231	56	19.712	1.05124	56	12.512	0.667265	56	29.684	1.58305	56	24.466	1.30477	56	7.653	0.408134	56	16.003	0.85344	56	15.268	0.814242	56	0	0	56	10.414	0.555379	56	10.853	0.57879	56	27.115	1.44604	56	18.49	0.986072	56	11.279
60	36.235	1.93241	60	10.296	0.549086	60	20.94	1.11673	60	5.676	0.302701	60	19.235	1.0258	60	8.413	0.448665	60	30.516	1.62742	60	16.267	0.867519	60	2.475	0.131992	60	17.829	0.950821	60	16.003	0.85344	60	4.773	0.254544	60	12.601	0.672011	60	15.839	0.844694	60	27.354	1.45879	60	17.679	0.942821	60	5.27
64	39.373	2.09976	64	8.732	0.465678	64	23.601	1.25864	64	5.385	0.287182	64	19.09	1.01807	64	2.867	0.152897	64	31.447	1.67707	64	15.002	0.800057	64	0	0	64	14.907	0.79499	64	17.845	0.951674	64	8.537	0.455278	64	13.437	0.716595	64	15.18	0.809549	64	29.436	1.56982	64	21.38	1.1402	64	5.088
68	42.101	2.24525	68	7.649	0.407921	68	25.402	1.35469	68	13.098	0.698516	68	26.104	1.39213	68	0	0	68	34.827	1.85732	68	4.95	0.263984	68	5.22	0.278383	68	19.565	1.0434	68	21.471	1.14505	68	12.046	0.642413	68	14.213	0.757979	68	13.667	0.728861	68	30.733	1.63899	68	23.431	1.24958	68	0
72	43.503	2.32001	72	0	0	72	22.589	1.20467	72	16.169	0.862293	72	24.66	1.31512	72	0	0	72	34.366	1.83274	72	7.004	0.373523	72	6.408	0.341739	72	18.693	0.996898	72	24.415	1.30205	72	11.279	0.601509	72	14.701	0.784004	72	16.935	0.903144	72	31.121	1.65968	72	24.134	1.28707	72	0
76	49.681	2.64949	76	0	0	76	23.564	1.25667	76	18.04	0.962073	76	23.041	1.22878	76	0	0	76	38.335	2.04441	76	7.786	0.415227	76	8.696	0.463758	76	12.983	0.692383	76	15.691	0.836801	76	13.8	0.735954	76	15.585	0.831148	76	12.601	0.672011	76	33.354	1.77877	76	24.608	1.31234	76	0
80	52.719	2.8115	80	0	0	80	25.986	1.38583	80	19.969	1.06495	80	25.309	1.34973	80	0	0	80	38.947	2.07704	80	6.27	0.334379	80	6.408	0.341739	80	18.236	0.972526	80	19.093	1.01823	80	13.876	0.740007	80	19.151	1.02132	80	15.723	0.838508	80	32.867	1.7528	80	25.055	1.33618	80	4.955
84	51.616	2.75268	84	8.139	0.434053	84	27.573	1.47047	84	18.391	0.980792	84	23.405	1.24819	84	0	0	84	40.716	2.17138	84	5.755	0.306914	84	9.487	0.505942	84	21.19	1.13006	84	20.138	1.07396	84	15.409	0.821762	84	15.467	0.824855	84	10.541	0.562152	84	35.725	1.90521	84	24.938	1.32994	84	0
88	53.038	2.82852	88	7	0.37331	88	26.235	1.39911	88	20.529	1.09481	88	24.15	1.28792	88	1.667	0.0889011	88	38.947	2.07704	88	6.6	0.351978	88	16.051	0.856	88	22.033	1.17502	88	22.689	1.21	88	17.452	0.930715	88	8.11	0.432506	88	14.716	0.784804	88	36.841	1.96473	88	23.345	1.24499	88	0
92	57.011	3.0404	92	10.794	0.575644	92	21.633	1.15369	92	22.201	1.18398	92	20.136	1.07385	92	7.333	0.391069	92	42.439	2.26327	92	8.201	0.437359	92	17.322	0.923782	92	20.344	1.08495	92	23.497	1.2531	92	20.069	1.07028	92	11.557	0.616335	92	11.494	0.612975	92	41.1	2.19186	92	24.187	1.28989	92	0
96	56.1	2.99181	96	13.757	0.733661	96	20.934	1.11641	96	24.083	1.28435	96	13.78	0.734887	96	8.117	0.43288	96	44.721	2.38497	96	6.388	0.340672	96	16.78	0.894877	96	17.295	0.922342	96	27.248	1.45314	96	21.297	1.13577	96	8.34	0.444772	96	13.4	0.714622	96	43.342	2.31143	96	18.918	1.0089	96	0
100	58.331	3.11079	100	11.281	0.601616	100	12.042	0.6422	100	21.273	1.13449	100	13.098	0.698516	100	5.426	0.289369	100	42.128	2.24669	100	8.132	0.43368	100	19.558	1.04303	100	17.651	0.941328	100	24.768	1.32088	100	23.135	1.23379	100	0	0	100	15.667	0.835521	100	45.774	2.44113	100	23.087	1.23123	100	5.754
104	56.785	3.02834	104	11.5	0.613295	104	8.062	0.429946	104	19.333	1.03103	104	12.445	0.663692	104	7.126	0.38003	104	45.509	2.42699	104	9.708	0.517728	104	21.426	1.14265	104	17.49	0.932742	104	19.508	1.04036	104	24.594	1.3116	104	0	0	104	12.88	0.68689	104	47.637	2.54048	104	24.122	1.28643	104	7.616
108	57.801	3.08253	108	18.507	0.986978	108	6.727	0.358751	108	22.632	1.20696	108	6.7	0.357311	108	13.924	0.742567	108	48.448	2.58373	108	5.551	0.296035	108	21.287	1.13524	108	18.236	0.972526	108	12.134	0.647106	108	26.754	1.42679	108	0	0	108	4.714	0.251398	108	44.593	2.37814	108	25.406	1.3549	108	5.077
112	61.288	3.26849	112	14.089	0.751366	112	3	0.15999	112	24.06	1.28312	112	4	0.21332	112	18.248	0.973166	112	45.701	2.43723	112	3.363	0.179349	112	22.263	1.18729	112	17.904	0.95482	112	7.318	0.390269	112	29.769	1.58758	112	0	0	112	8.498	0.453198	112	41.485	2.2124	112	26.685	1.42311	112	7.674
116	67.552	3.60255	116	15.7	0.837281	116	0	0	116	20.616	1.09945	116	7.696	0.410428	116	18.012	0.96058	116	46.098	2.45841	116	2.85	0.151991	116	23.308	1.24302	116	14.907	0.79499	116	5.375	0.286649	116	31.287	1.66854	116	3.682	0.196361	116	9.171	0.489089	116	32.776	1.74794	116	26.087	1.39122	116	11.813
120	65.485	3.49232	120	17.614	0.939355	120	0	0	120	17.133	0.913703	120	14.655	0.781551	120	23.62	1.25965	120	46.635	2.48704	120	0	0	120	25.239	1.346	120	5.897	0.314487	120	6.6	0.351978	120	34.734	1.85236	120	2.867	0.152897	120	21.297	1.13577	120	29.517	1.57414	120	27.62	1.47297	120	15.892
124	61.921	3.30225	124	21.471	1.14505	124	4.61	0.245851	124	16.526	0.881332	124	13.715	0.731421	124	30.157	1.60827	124	37.924	2.02249	124	0	0	124	25.521	1.36103	124	5.548	0.295875	124	9.006	0.48029	124	33.242	1.7728	124	10.883	0.58039	124	19.678	1.04943	124	24.698	1.31714	124	28.412	1.51521	124	18.481
128	53.745	2.86622	128	18.344	0.978286	128	0	0	128	17.951	0.957327	128	18.768	1.0009	128	24.739	1.31933	128	23.039	1.22867	128	0	0	128	26.169	1.39559	128	6.289	0.335392	128	10.198	0.543859	128	32.872	1.75306	128	13.187	0.703263	128	13.017	0.694197	128	21.03	1.12153	128	29.629	1.58011	128	19.437
132	42.406	2.26151	132	15.133	0.807043	132	0	0	132	11.494	0.612975	132	21.69	1.15673	132	4.714	0.251398	132	26.635	1.42044	132	4.472	0.238492	132	21.477	1.14537	132	4.922	0.26249	132	11.724	0.625241	132	31.765	1.69403	132	12.706	0.677611	132	7.071	0.377096	132	16.56	0.883145	132	29.221	1.55836	132	22.886
136	34.702	1.85066	136	15.692	0.836854	136	0	0	136	4.631	0.246971	136	22.482	1.19897	136	12.078	0.64412	136	26.335	1.40445	136	6.727	0.358751	136	17.002	0.906717	136	2.028	0.108153	136	11.686	0.623214	136	32.189	1.71664	136	12.369	0.659639	136	1.667	0.0889011	136	13.73	0.732221	136	28.575	1.5239	136	25.822
140	30.761	1.64048	140	17.241	0.919463	140	13.901	0.74134	140	4.667	0.248891	140	20.562	1.09657	140	19.333	1.03103	140	27.829	1.48412	140	6.6	0.351978	140	7.603	0.405468	140	0	0	140	13.004	0.693503	140	34.488	1.83925	140	13.703	0.730781	140	8.333	0.444399	140	10.062	0.536606	140	31.519	1.68091	140	25.386
144	25.495	1.35965	144	17	0.90661	144	11.662	0.621934	144	5.217	0.278223	144	19.746	1.05305	144	20.989	1.11934	144	29.758	1.58699	144	9.179	0.489516	144	11.524	0.614575	144	0	0	144	13.017	0.694197	144	35.347	1.88506	144	14.461	0.771205	144	11.338	0.604656	144	5.701	0.304034	144	33.48	1.78549	144	20.377
148	25.456	1.35757	148	14.036	0.74854	148	9	0.47997	148	8.439	0.450052	148	25.734	1.37239	148	17.591	0.938128	148	32.062	1.70987	148	12.207	0.650999	148	14.02	0.747687	148	0	0	148	15.699	0.837228	148	38.507	2.05358	148	16.347	0.871786	148	12.445	0.663692	148	6.403	0.341472	148	33.213	1.77125	148	15.333
152	18.742	0.999511	152	7.616	0.406161	152	5.148	0.274543	152	10.593	0.564925	152	25.805	1.37618	152	17.566	0.936795	152	33.283	1.77498	152	13.44	0.716755	152	14.866	0.792804	152	0	0	152	15.766	0.840801	152	39.532	2.10824	152	18.454	0.984152	152	11.081	0.59095	152	9.192	0.490209	152	31.73	1.69216	152	14.67
156	14.213	0.757979	156	9.823	0.523861	156	0	0	156	12.333	0.657719	156	17.544	0.935622	156	18.273	0.974499	156	35.158	1.87498	156	14.513	0.773978	156	17.335	0.924476	156	0	0	156	15.118	0.806243	156	37.884	2.02035	156	16.035	0.855147	156	16.879	0.900157	156	10.124	0.539913	156	29.674	1.58251	156	10.333
160	4.472	0.238492	160	16.688	0.889971	160	0	0	160	12.684	0.676438	160	14.67	0.782351	160	17.867	0.952847	160	38.357	2.04558	160	17.559	0.936421	160	16.464	0.878025	160	3.018	0.16095	160	12.019	0.640973	160	39.373	2.09976	160	17.285	0.921809	160	23.537	1.25523	160	17.205	0.917543	160	25.473	1.35848	160	4.679
164	4.031	0.214973	164	18	0.95994	164	0	0	164	13.828	0.737447	164	6.749	0.359924	164	18.909	1.00842	164	40.729	2.17208	164	19.731	1.05225	164	18.562	0.989911	164	5.044	0.268997	164	16.879	0.900157	164	40.848	2.17842	164	23.298	1.24248	164	20.423	1.08916	164	20.402	1.08804	164	28.761	1.53382	164	5.088
168	0	0	168	19.602	1.04537	168	5.59	0.298115	168	17.298	0.922502	168	0	0	168	19.607	1.04564	168	42.668	2.27548	168	24.1	1.28525	168	21.079	1.12414	168	4.216	0.224839	168	17.477	0.932048	168	43.743	2.33281	168	39.182	2.08958	168	18.487	0.985912	168	24.135	1.28712	168	22.395	1.19433	168	4.534
172	0	0	172	20.396	1.08772	172	6.671	0.355764	172	18.209	0.971086	172	0	0	172	19.692	1.05017	172	44.077	2.35063	172	25.458	1.35768	172	22.564	1.20334	172	0	0	172	13.908	0.741714	172	48.476	2.58523	172	19.599	1.04521	172	26.087	1.39122	172	22.322	1.19043	172	19.29	1.02874	172	3.727
176	0	0	176	22.051	1.17598	176	0	0	176	20.333	1.08436	176	0	0	176	18.768	1.0009	176	45.765	2.44065	176	24.603	1.31208	176	22.06	1.17646	176	0	0	176	11.837	0.631267	176	48.231	2.57216	176	25.009	1.33373	176	25.831	1.37757	176	24.683	1.31634	176	13.768	0.734247	176	4.643
180	0	0	180	22.006	1.17358	180	7.159	0.381789	180	19.163	1.02196	180	0	0	180	23.324	1.24387	180	46.677	2.48928	180	27.528	1.46807	180	24.698	1.31714	180	7.087	0.37795	180	9.804	0.522847	180	50.46	2.69103	180	26.543	1.41554	180	23.336	1.24451	180	28.04	1.49537	180	10.853	0.57879	180	8.28
184	7.649	0.407921	184	21.523	1.14782	184	0	0	184	22.356	1.19225	184	0	0	184	31.002	1.65334	184	50.706	2.70415	184	27.8	1.48257	184	22.739	1.21267	184	6.403	0.341472	184	11.87	0.633027	184	48.791	2.60202	184	30.229	1.61211	184	15.366	0.819469	184	29	1.54657	184	6.083	0.324406	184	11.494
188	8.559	0.456451	188	22.204	1.18414	188	0	0	188	22.823	1.21715	188	0	0	188	32.831	1.75088	188	51.027	2.72127	188	28.364	1.51265	188	12.652	0.674731	188	10.842	0.578204	188	14.614	0.779365	188	46.92	2.50224	188	28.661	1.52849	188	16.418	0.875572	188	30.037	1.60187	188	4.014	0.214067	188	13.271
192	9.618	0.512928	192	20.402	1.08804	192	0	0	192	24.012	1.28056	192	0	0	192	29.038	1.5486	192	52.18	2.78276	192	29.908	1.59499	192	11.413	0.608655	192	12.078	0.64412	192	14.907	0.79499	192	39.363	2.09923	192	26.76	1.42711	192	14	0.74662	192	33	1.75989	192	0	0	192	13.132
196	8.016	0.427493	196	26.476	1.41197	196	0	0	196	23.405	1.24819	196	0	0	196	25.612	1.36589	196	52.01	2.77369	196	31.945	1.70363	196	3.182	0.169696	196	14.314	0.763366	196	14.667	0.782191	196	30.885	1.6471	196	29.59	1.57803	196	12.758	0.680384	196	33.515	1.78735	196	12.706	0.677611	196	16.398
200	4.924	0.262597	200	28.218	1.50487	200	2.5	0.133325	200	21.929	1.16947	200	0	0	200	13.683	0.729714	200	56.12	2.99288	200	33.765	1.80069	200	0	0	200	13.744	0.732968	200	14.851	0.792004	200	24.134	1.28707	200	30.986	1.65248	200	13.4	0.714622	200	32.098	1.71179	200	9.068	0.483596	200	15.67
204	8.602	0.458745	204	28.43	1.51617	204	4.031	0.214973	204	26.571	1.41703	204	0	0	204	0	0	204	55.145	2.94088	204	33.958	1.81098	204	0	0	204	14.488	0.772645	204	16.786	0.895197	204	16.347	0.871786	204	37.024	1.97449	204	9.171	0.489089	204	31.643	1.68752	204	14.795	0.789017	204	17.159
208	10	0.5333	208	25	1.33325	208	6.103	0.325473	208	25.959	1.38439	208	0	0	208	0	0	208	57.581	3.07079	208	35.442	1.89012	208	0	0	208	16.697	0.890451	208	18.962	1.01124	208	10.296	0.549086	208	41.442	2.2101	208	10.198	0.543859	208	27.505	1.46684	208	14.885	0.793817	208	22.176
212	11.511	0.613882	212	23.548	1.25581	212	2.062	0.109966	212	24.244	1.29293	212	6.642	0.354218	212	2.828	0.150817	212	55.369	2.95283	212	34.34	1.83135	212	0	0	212	19.235	1.0258	212	21.512	1.14723	212	11.377	0.606735	212	41.399	2.20781	212	14.004	0.746833	212	21.645	1.15433	212	16.72	0.891678	212	23.333
216	14.603	0.778778	216	19.235	1.0258	216	8	0.42664	216	25.686	1.36983	216	11.353	0.605455	216	6.708	0.357738	216	60.963	3.25116	216	26.001	1.38663	216	0	0	216	16.138	0.86064	216	21.751	1.15998	216	17.754	0.946821	216	42.085	2.24439	216	19.805	1.0562	216	17.564	0.936688	216	13.387	0.713929	216	27.956
220	17.328	0.924102	220	13.5	0.719955	220	6.021	0.3211	220	26.587	1.41788	220	12.758	0.680384	220	8.028	0.428133	220	61.958	3.30422	220	19.105	1.01887	220	0	0	220	13.8	0.735954	220	22.983	1.22568	220	18.8	1.0026	220	41.2	2.1972	220	15.424	0.822562	220	15.075	0.80395	220	9.153	0.488129	220	28.288
224	18.742	0.999511	224	5.5	0.293315	224	8.746	0.466424	224	28.231	1.50556	224	17.003	0.90677	224	9.22	0.491703	224	63.792	3.40203	224	11.194	0.596976	224	0	0	224	11.935	0.636494	224	22.689	1.21	224	22.492	1.1995	224	40.891	2.18072	224	14.016	0.747473	224	18.069	0.96362	224	13.098	0.698516	224	29.509
228	18.768	1.0009	228	6.671	0.355764	228	12.619	0.672971	228	31.002	1.65334	228	19.379	1.03348	228	14.15	0.754619	228	64.777	3.45456	228	4.316	0.230172	228	0	0	228	7.087	0.37795	228	19.565	1.0434	228	21.554	1.14947	228	40.716	2.17138	228	10.05	0.535967	228	14.916	0.79547	228	12.758	0.680384	228	31.145
232	13.757	0.733661	232	5	0.26665	232	21.148	1.12782	232	33.109	1.7657	232	16.333	0.871039	232	13.437	0.716595	232	60.774	3.24108	232	0	0	232	0	0	232	7.81	0.416507	232	15.424	0.822562	232	26.173	1.39581	232	35.766	1.9074	232	17.67	0.942341	232	9.618	0.512928	232	15.681	0.836268	232	35.629
236	8.846	0.471757	236	6.042	0.32222	236	18.722	0.998444	236	35.217	1.87812	236	11.643	0.620921	236	10.006	0.53362	236	59.21	3.15767	236	16.623	0.886505	236	12.003	0.64012	236	11.18	0.596229	236	8.975	0.478637	236	25.822	1.37709	236	32.745	1.74629	236	17.544	0.935622	236	0	0	236	18.871	1.00639	236	36.077
240	12.54	0.668758	240	5.408	0.288409	240	21.03	1.12153	240	32.249	1.71984	240	8.246	0.439759	240	15.092	0.804856	240	59.54	3.17527	240	0	0	240	10.35	0.551965	240	14.701	0.784004	240	7.311	0.389896	240	28.241	1.50609	240	27.849	1.48519	240	17.978	0.958767	240	0	0	240	16.087	0.85792	240	39.265
244	15.811	0.843201	244	7.433	0.396402	244	19.78	1.05487	244	27.033	1.44167	244	0	0	244	12.338	0.657986	244	64.056	3.41611	244	5.154	0.274863	244	16.683	0.889704	244	16.111	0.8592	244	7.491	0.399495	244	30.934	1.64971	244	18.535	0.988472	244	17.717	0.944848	244	0	0	244	21.021	1.12105	244	38.8
248	25.402	1.35469	248	12.083	0.644386	248	19.294	1.02895	248	20.377	1.08671	248	0	0	248	11.898	0.63452	248	63.439	3.3832	248	11.25	0.599963	248	10.9	0.581297	248	9.068	0.483596	248	11.837	0.631267	248	33.163	1.76858	248	14.621	0.779738	248	17.951	0.957327	248	0	0	248	22.718	1.21155	248	42.638
252	30	1.5999	252	15.042	0.80219	252	28.623	1.52646	252	11.045	0.58903	252	7.063	0.37667	252	15.38	0.820215	252	66.667	3.55535	252	13.2	0.703956	252	18.569	0.990285	252	8.969	0.478317	252	11.402	0.608069	252	34.7	1.85055	252	7.803	0.416134	252	20.616	1.09945	252	0	0	252	19.565	1.0434	252	43.365
256	36.776	1.96126	256	16.867	0.899517	256	19.138	1.02063	256	5.821	0.310434	256	14.213	0.757979	256	19.805	1.0562	256	66.855	3.56538	256	13.901	0.74134	256	19.105	1.01887	256	9.534	0.508448	256	12.166	0.648813	256	34.681	1.84954	256	6.667	0.355551	256	23.837	1.27123	256	0	0	256	17.385	0.927142	256	45.607
260	34.34	1.83135	260	16.621	0.886398	260	20.881	1.11358	260	3.399	0.181269	260	11.314	0.603376	260	24.513	1.30728	260	65.451	3.4905	260	16.111	0.8592	260	12.502	0.666732	260	6.119	0.326326	260	12.115	0.646093	260	36.644	1.95422	260	6.146	0.327766	260	24.895	1.32765	260	3.162	0.168629	260	17.029	0.908157	260	46.035
264	34.34	1.83135	264	19.66	1.04847	264	14.577	0.777391	264	4.631	0.246971	264	16.469	0.878292	264	22.214	1.18467	264	68.568	3.65673	264	17.96	0.957807	264	7.945	0.423707	264	6.263	0.334006	264	14.349	0.765232	264	37.997	2.02638	264	3.606	0.192308	264	29.963	1.59793	264	9	0.47997	264	16.031	0.854933	264	47.225
268	37.716	2.01139	268	20.1	1.07193	268	5	0.26665	268	4.534	0.241798	268	14.806	0.789604	268	21.234	1.13241	268	68.665	3.6619	268	18.901	1.00799	268	0	0	268	6.119	0.326326	268	12.338	0.657986	268	37.495	1.99961	268	10.75	0.573298	268	33.44	1.78336	268	7.5	0.399975	268	7.782	0.415014	268	51.461
272	38.2	2.03721	272	27.065	1.44338	272	5.315	0.283449	272	10.525	0.561298	272	19.394	1.03428	272	18.95	1.0106	272	66.094	3.52479	272	21.744	1.15961	272	0	0	272	7.157	0.381683	272	7.696	0.410428	272	40.762	2.17384	272	11.629	0.620175	272	30.683	1.63632	272	6.519	0.347658	272	6.872	0.366484	272	51.644
276	36.5	1.94655	276	18.527	0.988045	276	2	0.10666	276	17.013	0.907303	276	21.108	1.12569	276	24.606	1.31224	276	72.555	3.86936	276	23.55	1.25592	276	7.004	0.373523	276	10.138	0.54066	276	7.087	0.37795	276	41.486	2.21245	276	15.723	0.838508	276	36.223	1.93177	276	10.512	0.560605	276	4.643	0.247611	276	52.162
280	34.677	1.84932	280	19.105	1.01887	280	2.693	0.143618	280	17.013	0.907303	280	19.394	1.03428	280	20.248	1.07983	280	66.941	3.56996	280	24.65	1.31458	280	6.731	0.358964	280	11.319	0.603642	280	6.368	0.339605	280	42.948	2.29042	280	17	0.90661	280	30.991	1.65275	280	8.631	0.460291	280	4.643	0.247611	280	56.806
284	23.712	1.26456	284	16.53	0.881545	284	7.433	0.396402	284	20.467	1.09151	284	20.279	1.08148	284	25.336	1.35117	284	58.035	3.09501	284	23.001	1.22664	284	8.078	0.4308	284	14.016	0.747473	284	6.146	0.327766	284	45.668	2.43547	284	16.865	0.89941	284	22.91	1.22179	284	13.537	0.721928	284	4.955	0.26425	284	58.428
288	38.917	2.07544	288	24.418	1.30221	288	4.031	0.214973	288	20.883	1.11369	288	16.388	0.873972	288	28.975	1.54524	288	48.637	2.59381	288	24.941	1.3301	288	6.103	0.325473	288	10.382	0.553672	288	5.426	0.289369	288	46.679	2.48939	288	21.359	1.13908	288	18.361	0.979192	288	10.607	0.565671	288	15.232	0.812323	288	58.747
292	37.503	2.00003	292	29.364	1.56598	292	7.071	0.377096	292	22.755	1.21352	292	12.824	0.683904	292	29.548	1.57579	292	41.11	2.1924	292	19.458	1.0377	292	8.493	0.452932	292	11.005	0.586897	292	4.269	0.227666	292	49.649	2.64778	292	17.904	0.95482	292	10.296	0.549086	292	10.124	0.539913	292	15.723	0.838508	292	59.046
296	37.101	1.9786	296	26.401	1.40797	296	2.5	0.133325	296	21.975	1.17193	296	5.385	0.287182	296	25.959	1.38439	296	33.415	1.78202	296	22.468	1.19822	296	11.792	0.628867	296	11.04	0.588763	296	7.063	0.37667	296	48.083	2.56427	296	15.902	0.848054	296	10.919	0.58231	296	10.92	0.582364	296	19.827	1.05737	296	62.313
300	41.725	2.22519	300	20.652	1.10137	300	5.831	0.310967	300	13.106	0.698943	300	8.825	0.470637	300	34.975	1.86522	300	27.335	1.45778	300	25.311	1.34984	300	14.577	0.777391	300	12.257	0.653666	300	8.769	0.467651	300	54.716	2.918	300	18.693	0.996898	300	9.69	0.516768	300	10.062	0.536606	300	20.344	1.08495	300	64.873
304	36.878	1.9667	304	21.36	1.13913	304	10.92	0.582364	304	10.006	0.53362	304	15.755	0.840214	304	34.464	1.83797	304	21.911	1.16851	304	23.352	1.24536	304	12.855	0.685557	304	9.098	0.485196	304	12.374	0.659905	304	51.521	2.74761	304	17.742	0.946181	304	10.713	0.571324	304	14.009	0.7471	304	23.535	1.25512	304	64.692
308	31.828	1.69739	308	28.623	1.52646	308	13.086	0.697876	308	10.44	0.556765	308	16.169	0.862293	308	36.125	1.92655	308	14.213	0.757979	308	20.908	1.11502	308	12.947	0.690464	308	12.083	0.644386	308	14.063	0.74998	308	52.979	2.82537	308	13.601	0.725341	308	7.846	0.418427	308	21.024	1.12121	308	25.144	1.34093	308	67.962
312	23.114	1.23267	312	33.354	1.77877	312	16.971	0.905063	312	8.498	0.453198	312	9.944	0.530314	312	35.743	1.90617	312	10.088	0.537993	312	18.045	0.96234	312	13.865	0.73942	312	12.758	0.680384	312	14.765	0.787417	312	53.94	2.87662	312	19.351	1.03199	312	10.593	0.564925	312	22.506	1.20024	312	25.237	1.34589	312	67.897
316	13.793	0.735581	316	28.324	1.51052	316	20.839	1.11134	316	5.467	0.291555	316	10.022	0.534473	316	35.002	1.86666	316	9.262	0.493942	316	12.191	0.650146	316	14.91	0.79515	316	10.672	0.569138	316	17.978	0.958767	316	54.834	2.9243	316	18.382	0.980312	316	12.042	0.6422	316	22.506	1.20024	316	27.427	1.46268	316	63.851
320	8.485	0.452505	320	22.809	1.2164	320	18.822	1.00378	320	0	0	320	13.153	0.701449	320	37.997	2.02638	320	8.537	0.455278	320	7.603	0.405468	320	15.429	0.822829	320	12.401	0.661345	320	22.534	1.20174	320	55.141	2.94067	320	19.405	1.03487	320	13.017	0.694197	320	24.546	1.30904	320	30.964	1.65131	320	57.11
324	0	0	324	30.647	1.6344	324	20.18	1.0762	324	0	0	324	15	0.79995	324	37.72	2.01161	324	9.22	0.491703	324	5.099	0.27193	324	28.316	1.51009	324	9.69	0.516768	324	21.82	1.16366	324	42.302	2.25597	324	20.562	1.09657	324	15.755	0.840214	324	26.005	1.38685	324	30.236	1.61249	324	54.091
328	0	0	328	31.847	1.6984	328	15.207	0.810989	328	0	0	328	20.734	1.10574	328	37.024	1.97449	328	7.311	0.389896	328	4.717	0.251558	328	31.469	1.67824	328	14.926	0.796004	328	23.343	1.24488	328	35.127	1.87332	328	16.169	0.862293	328	11.629	0.620175	328	27.505	1.46684	328	31.455	1.6775	328	47.67
332	5.59	0.298115	332	37.62	2.00627	332	13.2	0.703956	332	0	0	332	18.962	1.01124	332	33.335	1.77776	332	12.763	0.680651	332	5.274	0.281262	332	31.466	1.67808	332	7.071	0.377096	332	25.701	1.37063	332	34.314	1.82997	332	16.003	0.85344	332	13.187	0.703263	332	29.017	1.54748	332	35.634	1.90036	332	41.231
336	14	0.74662	336	22.699	1.21054	336	5.701	0.304034	336	7.196	0.383763	336	19.189	1.02335	336	21.911	1.16851	336	13.017	0.694197	336	7.537	0.401948	336	39.916	2.12872	336	10.44	0.556765	336	24.445	1.30365	336	26.415	1.40871	336	12.374	0.659905	336	14.162	0.755259	336	27	1.43991	336	32.6	1.73856	336	37.006
340	21.272	1.13444	340	34.442	1.83679	340	7	0.37331	340	12.875	0.686624	340	13.667	0.728861	340	19.09	1.01807	340	17.464	0.931355	340	6.25	0.333313	340	40.008	2.13363	340	9.911	0.528554	340	24.459	1.3044	340	11.353	0.605455	340	19	1.01327	340	15.892	0.84752	340	23.548	1.25581	340	35.741	1.90607	340	30.148
344	23.854	1.27213	344	12.01	0.640493	344	4.528	0.241478	344	13.618	0.726248	344	16.455	0.877545	344	12.134	0.647106	344	20.467	1.09151	344	9.1	0.485303	344	38.833	2.07096	344	6.403	0.341472	344	24.331	1.29757	344	7.803	0.416134	344	17.391	0.927462	344	21.129	1.12681	344	20.524	1.09454	344	36.31	1.93641	344	25.565
348	23.436	1.24984	348	17.066	0.91013	348	3.5	0.186655	348	14.24	0.759419	348	11.898	0.63452	348	3.727	0.198761	348	19.471	1.03839	348	7.988	0.426	348	33.015	1.76069	348	15.151	0.808003	348	30	1.5999	348	3.333	0.177749	348	16.67	0.889011	348	23.039	1.22867	348	12.093	0.64492	348	37.836	2.01779	348	22.874
352	30.303	1.61606	352	15.232	0.812323	352	10.92	0.582364	352	15.563	0.829975	352	11.377	0.606735	352	5.207	0.277689	352	24.518	1.30754	352	11.15	0.59463	352	36.154	1.92809	352	23.61	1.25912	352	32.007	1.70693	352	0	0	352	14.063	0.74998	352	21.003	1.12009	352	10.05	0.535967	352	40.35	2.15187	352	20.939
356	28.692	1.53014	356	16.621	0.886398	356	21.401	1.14132	356	16.418	0.875572	356	15.033	0.80171	356	3.073	0.163883	356	25.353	1.35208	356	13.901	0.74134	356	34.823	1.85711	356	21.812	1.16323	356	33.726	1.79861	356	0	0	356	9.098	0.485196	356	13.601	0.725341	356	8.016	0.427493	356	40.262	2.14717	356	21.263
360	29.206	1.55756	360	18.608	0.992365	360	20.887	1.1139	360	17.951	0.957327	360	20.243	1.07956	360	0	0	360	26.604	1.41879	360	12.068	0.643586	360	38.95	2.0772	360	23.589	1.258	360	33.534	1.78837	360	0	0	360	5.897	0.314487	360	15.424	0.822562	360	8.246	0.439759	360	40.859	2.17901	360	19
364	33.354	1.77877	364	19.831	1.05759	364	22.204	1.18414	364	18.336	0.977859	364	20.011	1.06719	364	6.227	0.332086	364	29.038	1.5486	364	10.124	0.539913	364	47.374	2.52646	364	21.169	1.12894	364	33.984	1.81237	364	2.867	0.152897	364	4.773	0.254544	364	19.565	1.0434	364	13.5	0.719955	364	41.72	2.22493	364	14.488
368	37.845	2.01827	368	12.42	0.662359	368	22.023	1.17449	368	24.141	1.28744	368	18.003	0.9601	368	9.989	0.532713	368	18.601	0.991991	368	13.124	0.699903	368	29.885	1.59377	368	25.06	1.33645	368	35.128	1.87338	368	7.211	0.384563	368	7.454	0.397522	368	15.691	0.836801	368	17.103	0.912103	368	41.074	2.19048	368	9.104
372	38.279	2.04142	372	12.01	0.640493	372	22.743	1.21288	372	23.57	1.25699	372	17.159	0.915089	372	13.068	0.696916	372	13.507	0.720328	372	14.699	0.783898	372	30.083	1.60433	372	26.644	1.42092	372	36.795	1.96228	372	13.872	0.739794	372	7.211	0.384563	372	18.682	0.996311	372	17.263	0.920636	372	40.908	2.18162	372	5.27
376	40.327	2.15064	376	7.018	0.37427	376	27.722	1.47841	376	25.959	1.38439	376	19.012	1.01391	376	6.642	0.354218	376	14.067	0.750193	376	11.877	0.6334	376	14.562	0.776591	376	28.985	1.54577	376	38.534	2.05502	376	15.114	0.80603	376	5.27	0.281049	376	17.745	0.946341	376	16.808	0.896371	376	44.653	2.38134	376	14.866
380	42.711	2.27778	380	13.928	0.74278	380	30.008	1.60033	380	21.99	1.17273	380	14.067	0.750193	380	20.011	1.06719	380	10.899	0.581244	380	15.275	0.814616	380	13.521	0.721075	380	26.342	1.40482	380	38.019	2.02755	380	14.802	0.789391	380	7.157	0.381683	380	20.989	1.11934	380	18.828	1.0041	380	44.213	2.35788	380	17.452
384	45.277	2.41462	384	15.042	0.80219	384	28.284	1.50839	384	24.021	1.28104	384	15.059	0.803096	384	22.296	1.18905	384	15.391	0.820802	384	6.671	0.355764	384	14.682	0.782991	384	22.351	1.19198	384	40.277	2.14797	384	21.218	1.13156	384	6.708	0.357738	384	17.67	0.942341	384	21.915	1.16873	384	48.637	2.59381	384	18.077
388	45.632	2.43355	388	16.348	0.871839	388	32.757	1.74693	388	26.087	1.39122	388	13.482	0.718995	388	22.475	1.19859	388	16.155	0.861546	388	15.203	0.810776	388	12.87	0.686357	388	14.193	0.756913	388	41.355	2.20546	388	22.864	1.21934	388	7.401	0.394695	388	18.336	0.977859	388	24.052	1.28269	388	49.944	2.66351	388	22.961
392	44.814	2.38993	392	16.101	0.858666	392	30.956	1.65088	392	27.867	1.48615	392	9.244	0.492983	392	26.401	1.40797	392	17.159	0.915089	392	12.395	0.661025	392	8.902	0.474744	392	7.454	0.397522	392	43.698	2.33041	392	24.533	1.30834	392	9.69	0.516768	392	33.797	1.80239	392	20.396	1.08772	392	44.033	2.34828	392	26.24
396	41.704	2.22407	396	17.614	0.939355	396	34.205	1.82415	396	29.562	1.57654	396	10.138	0.54066	396	15.442	0.823522	396	19.474	1.03855	396	11.654	0.621508	396	8.678	0.462798	396	5.821	0.310434	396	48.103	2.56533	396	28.425	1.51591	396	7.782	0.415014	396	31.157	1.6616	396	18.2	0.970606	396	43.748	2.33308	396	24.415
400	39.361	2.09912	400	18.007	0.960313	400	32.515	1.73402	400	30.423	1.62246	400	10.672	0.569138	400	9.22	0.491703	400	20.011	1.06719	400	11.557	0.616335	400	7.302	0.389416	400	0	0	400	44.754	2.38673	400	27.203	1.45074	400	6.708	0.357738	400	24.388	1.30061	400	10.512	0.560605	400	38.577	2.05731	400	27.008
404	33.095	1.76496	404	19.059	1.01642	404	37.713	2.01123	404	31.335	1.6711	404	19.333	1.03103	404	5.497	0.293155	404	24.822	1.32376	404	7.115	0.379443	404	6.27	0.334379	404	5.897	0.314487	404	45.049	2.40246	404	27.669	1.47559	404	12.966	0.691477	404	22.081	1.17758	404	11.662	0.621934	404	36.825	1.96388	404	27.891
408	28.306	1.50956	408	23.286	1.24184	408	37.947	2.02371	408	32.441	1.73008	408	11.743	0.626254	408	0	0	408	24.875	1.32658	408	8.923	0.475864	408	4.138	0.22068	408	6.412	0.341952	408	48.233	2.57227	408	27.938	1.48993	408	12.257	0.653666	408	23.707	1.26429	408	11.336	0.604549	408	32.338	1.72459	408	28.363
412	24.274	1.29453	412	21.552	1.14937	412	16.621	0.886398	412	37.263	1.98724	412	6.333	0.337739	412	0	0	412	25.841	1.3781	412	7.289	0.388722	412	3.717	0.198228	412	7.341	0.391496	412	41.043	2.18882	412	27.406	1.46156	412	13.908	0.741714	412	22.043	1.17555	412	9.22	0.491703	412	30.275	1.61457	412	29.237
416	25.52	1.36098	416	27.166	1.44876	416	18.5	0.986605	416	37.774	2.01449	416	12.405	0.661559	416	0	0	416	28.363	1.5126	416	4.931	0.26297	416	4.854	0.258864	416	5.831	0.310967	416	37.574	2.00382	416	28.535	1.52177	416	14.896	0.794404	416	18.306	0.976259	416	8.078	0.4308	416	26.617	1.41948	416	29.967
420	26.879	1.43346	420	17.868	0.9529	420	15.692	0.836854	420	34.745	1.85295	420	14.337	0.764592	420	0	0	420	27.669	1.47559	420	6.25	0.333313	420	8.162	0.435279	420	7.674	0.409254	420	29.533	1.57499	420	29.069	1.55025	420	14.099	0.7519	420	13.416	0.715475	420	7.28	0.388242	420	25.632	1.36695	420	33.903
424	25.87	1.37965	424	10.124	0.539913	424	17.464	0.931355	424	37.949	2.02382	424	15.041	0.802137	424	7.157	0.381683	424	31.455	1.6775	424	8.754	0.466851	424	5.062	0.269956	424	0	0	424	25.32	1.35032	424	31.356	1.67222	424	12.88	0.68689	424	14.016	0.747473	424	9.552	0.509408	424	25.256	1.3469	424	30.987
428	18.822	1.00378	428	5.22	0.278383	428	19.294	1.02895	428	34.158	1.82165	428	14.881	0.793604	428	11.377	0.606735	428	36.462	1.94452	428	5.75	0.306648	428	5.315	0.283449	428	6.009	0.32046	428	18.345	0.978339	428	34.425	1.83589	428	11.571	0.617081	428	15.463	0.824642	428	12.166	0.648813	428	24.81	1.32312	428	33.711
432	16.101	0.858666	432	27.042	1.44215	432	18.069	0.96362	432	26.46	1.41111	432	16.499	0.879892	432	14.38	0.766885	432	39.138	2.08723	432	6.27	0.334379	432	4.161	0.221906	432	10.296	0.549086	432	14.333	0.764379	432	39.735	2.11907	432	14.142	0.754193	432	15.133	0.807043	432	11.5	0.613295	432	21.084	1.12441	432	36.845
436	21.954	1.17081	436	29.3	1.56257	436	20.5	1.09327	436	20.838	1.11129	436	19.678	1.04943	436	14.337	0.764592	436	39.023	2.0811	436	5.64	0.300781	436	3.808	0.203081	436	7.379	0.393522	436	9.006	0.48029	436	41.49	2.21266	436	17.978	0.958767	436	20.213	1.07796	436	16.508	0.880372	436	19.88	1.0602	436	35.971
440	32.653	1.74138	440	21.506	1.14691	440	28.111	1.49916	440	14.472	0.771792	440	17.117	0.91285	440	14.15	0.754619	440	36.37	1.93961	440	5.031	0.268303	440	4.776	0.254704	440	7.311	0.389896	440	5.676	0.302701	440	39.851	2.12525	440	18.196	0.970393	440	17.385	0.927142	440	22.699	1.21054	440	19.128	1.0201	440	37.393
444	23.964	1.278	444	19.831	1.05759	444	28.359	1.51239	444	7.318	0.390269	444	25.195	1.34365	444	19.351	1.03199	444	27.849	1.48519	444	6.562	0.349951	444	5.506	0.293635	444	11.18	0.596229	444	4.534	0.241798	444	42.715	2.27799	444	15.606	0.832268	444	16.776	0.894664	444	23.564	1.25667	444	11.926	0.636014	444	39.801
448	24.233	1.29235	448	15.207	0.810989	448	28.535	1.52177	448	0	0	448	27.287	1.45522	448	20.979	1.11881	448	27.913	1.4886	448	5.274	0.281262	448	7.754	0.413521	448	10.919	0.58231	448	7.696	0.410428	448	44.092	2.35143	448	15.041	0.802137	448	20.243	1.07956	448	15.811	0.843201	448	11.552	0.616068	448	39.751
452	15.89	0.847414	452	13.463	0.717982	452	30.042	1.60214	452	0	0	452	23.676	1.26264	452	20.292	1.08217	452	31.434	1.67638	452	4.272	0.227826	452	8.004	0.426853	452	10.462	0.557938	452	9.387	0.500609	452	38.892	2.07411	452	18.838	1.00463	452	23.674	1.26253	452	8.631	0.460291	452	11.705	0.624228	452	39.217
456	13	0.69329	456	8.139	0.434053	456	12.166	0.648813	456	0	0	456	10.355	0.552232	456	21.685	1.15646	456	27.366	1.45943	456	5	0.26665	456	8.404	0.448185	456	9.911	0.528554	456	11.667	0.622201	456	32.087	1.7112	456	12.706	0.677611	456	27.522	1.46775	456	9.823	0.523861	456	12.649	0.674571	456	43.912
460	19.242	1.02618	460	6.021	0.3211	460	13.647	0.727795	460	0	0	460	8	0.42664	460	22.393	1.19422	460	22.103	1.17875	460	6.865	0.36611	460	7.357	0.392349	460	7.732	0.412348	460	13.106	0.698943	460	24.801	1.32264	460	12.758	0.680384	460	28.674	1.52918	460	13.124	0.699903	460	13.482	0.718995	460	44.782
464	23.479	1.25214	464	5.523	0.294542	464	7.5	0.399975	464	0	0	464	0	0	464	26.401	1.40797	464	26.742	1.42615	464	6.951	0.370697	464	4.257	0.227026	464	6.642	0.354218	464	9.707	0.517674	464	19.805	1.0562	464	10.713	0.571324	464	26	1.38658	464	13.153	0.701449	464	13.208	0.704383	464	43.584
468	27.102	1.44535	468	12.093	0.64492	468	8.515	0.454105	468	0	0	468	10.203	0.544126	468	30	1.5999	468	29.358	1.56566	468	9.09	0.48477	468	4.65	0.247985	468	7.311	0.389896	468	6.574	0.350591	468	12.293	0.655586	468	9.41	0.501835	468	29.12	1.55297	468	18.111	0.96586	468	13.667	0.728861	468	48.472
472	28.412	1.51521	472	16.771	0.894397	472	18.028	0.961433	472	0	0	472	8.975	0.478637	472	28.599	1.52518	472	37.684	2.00969	472	8.459	0.451118	472	6.265	0.334112	472	7.542	0.402215	472	7.318	0.390269	472	2.108	0.11242	472	13.098	0.698516	472	31.131	1.66022	472	16.14	0.860746	472	16.014	0.854027	472	49.477
476	26.618	1.41954	476	17.678	0.942768	476	18.446	0.983725	476	0	0	476	15.839	0.844694	476	29.503	1.57339	476	39.129	2.08675	476	12.137	0.647266	476	8.004	0.426853	476	7.52	0.401042	476	9.434	0.503115	476	0	0	476	13.864	0.739367	476	34.745	1.85295	476	20.1	1.07193	476	15.059	0.803096	476	52.936
480	26.613	1.41927	480	12.379	0.660172	480	18.028	0.961433	480	0	0	480	14.795	0.789017	480	29.398	1.5678	480	39.836	2.12445	480	13.551	0.722675	480	13.193	0.703583	480	12.828	0.684117	480	17.159	0.915089	480	0	0	480	16.337	0.871252	480	33.668	1.79551	480	20.261	1.08052	480	13.437	0.716595	480	56.44
484	33.56	1.78975	484	11.236	0.599216	484	10.012	0.53394	484	0	0	484	12.134	0.647106	484	31.179	1.66278	484	44.711	2.38444	484	15.225	0.811949	484	14.18	0.756219	484	8.117	0.43288	484	21.378	1.14009	484	0	0	484	17.052	0.909383	484	32.673	1.74245	484	20.815	1.11006	484	9.44	0.503435	484	52.001
488	39.689	2.11661	488	22.102	1.1787	488	15.033	0.80171	488	0	0	488	23.118	1.23288	488	34.667	1.84879	488	46.66	2.48838	488	15.219	0.811629	488	14.674	0.782564	488	11.02	0.587697	488	22	1.17326	488	3.432	0.183029	488	17.789	0.948687	488	33.34	1.77802	488	21.829	1.16414	488	6.749	0.359924	488	53.384
492	40.311	2.14979	492	21.593	1.15155	492	17.117	0.91285	492	0	0	492	14.181	0.756273	492	40.497	2.15971	492	45.923	2.44907	492	16.9	0.901277	492	15.219	0.811629	492	20.292	1.08217	492	23.077	1.2307	492	5.385	0.287182	492	17.867	0.952847	492	26.566	1.41676	492	24.254	1.29347	492	3.887	0.207294	492	51.343
496	37.366	1.99273	496	20.1	1.07193	496	19.906	1.06159	496	0	0	496	20.934	1.11641	496	37.205	1.98414	496	45.447	2.42369	496	19.252	1.02671	496	19.095	1.01834	496	18.135	0.96714	496	19.847	1.05844	496	6.227	0.332086	496	17.629	0.940155	496	19.128	1.0201	496	26.5	1.41325	496	6.574	0.350591	496	51.671
500	38.03	2.02814	500	25.179	1.3428	500	13.416	0.715475	500	0	0	500	11.743	0.626254	500	39.057	2.08291	500	45.769	2.44086	500	19.693	1.05023	500	18.951	1.01066	500	6.864	0.366057	500	12.966	0.691477	500	7.601	0.405361	500	19.647	1.04777	500	17.464	0.931355	500	25.894	1.38093	500	6.037	0.321953	500	31.51
504	48.564	2.58992	504	26.5	1.41325	504	19.558	1.04303	504	0	0	504	3.667	0.195561	504	32.668	1.74218	504	46.934	2.50299	504	21.451	1.14398	504	28.514	1.52065	504	12.806	0.682944	504	9.667	0.515541	504	9.545	0.509035	504	19.336	1.03119	504	8.8	0.469304	504	28.636	1.52716	504	7.753	0.413467	504	25.597
508	48.6	2.59184	508	28.862	1.53921	508	14.714	0.784698	508	9.758	0.520394	508	5.375	0.286649	508	38.495	2.05294	508	48.805	2.60277	508	15.008	0.800377	508	32.5	1.73323	508	6.667	0.355551	508	13.004	0.693503	508	9.69	0.516768	508	18.336	0.977859	508	3.432	0.183029	508	33.136	1.76714	508	7.616	0.406161	508	26.352
512	46.811	2.49643	512	27.354	1.45879	512	18.18	0.969539	512	22.561	1.20318	512	4.679	0.249531	512	43.283	2.30828	512	45.212	2.41116	512	16.752	0.893384	512	21.91	1.16846	512	9.434	0.503115	512	19.624	1.04655	512	8.353	0.445465	512	20.883	1.11369	512	5	0.26665	512	30.907	1.64827	512	10.419	0.555645	512	24.342
516	42.746	2.27964	516	29.3	1.56257	516	23.071	1.23038	516	25.675	1.36925	516	3.073	0.163883	516	38.478	2.05203	516	42.99	2.29266	516	18.823	1.00383	516	16.643	0.887571	516	12.257	0.653666	516	22.073	1.17715	516	9.006	0.48029	516	23.77	1.26765	516	3.59	0.191455	516	34.442	1.83679	516	11.47	0.611695	516	25.02
520	49.51	2.64037	520	28.636	1.52716	520	24.352	1.29869	520	22.071	1.17705	520	12.078	0.64412	520	41.806	2.22951	520	35.158	1.87498	520	19.851	1.05865	520	12.435	0.663159	520	12.225	0.651959	520	23.307	1.24296	520	8.667	0.462211	520	21.769	1.16094	520	7.032	0.375017	520	32.882	1.7536	520	11.47	0.611695	520	28.018
524	54.601	2.91187	524	23.717	1.26483	524	17.183	0.916369	524	25.06	1.33645	524	10.858	0.579057	524	46.236	2.46577	524	28.944	1.54358	524	18.045	0.96234	524	19.729	1.05215	524	5.935	0.316514	524	26.034	1.38839	524	6.616	0.352831	524	19.894	1.06095	524	6.799	0.362591	524	35.171	1.87567	524	11.392	0.607535	524	35.335
528	49.82	2.6569	528	21.552	1.14937	528	5.852	0.312087	528	25.168	1.34221	528	19.379	1.03348	528	50.413	2.68853	528	21.357	1.13897	528	19.78	1.05487	528	26.595	1.41831	528	4.738	0.252678	528	25.71	1.37111	528	6.667	0.355551	528	18.345	0.978339	528	9.481	0.505622	528	33.838	1.80458	528	12.776	0.681344	528	36.039
532	40.041	2.13539	532	17.088	0.911303	532	10.05	0.535967	532	36.408	1.94164	532	19.003	1.01343	532	45.197	2.41036	532	15.808	0.843041	532	20.194	1.07695	532	25.653	1.36807	532	4.346	0.231772	532	25.889	1.38066	532	7.318	0.390269	532	19.405	1.03487	532	10.269	0.547646	532	36.688	1.95657	532	13.437	0.716595	532	43.105
536	32.016	1.70741	536	14.318	0.763579	536	6.946	0.37043	536	34.975	1.86522	536	17	0.90661	536	46.786	2.4951	536	9.475	0.505302	536	16.677	0.889384	536	28.471	1.51836	536	7.542	0.402215	536	22.356	1.19225	536	6.708	0.357738	536	5.375	0.286649	536	11.949	0.63724	536	29.602	1.57867	536	17.667	0.942181	536	33.108
540	20.304	1.08281	540	10.689	0.570044	540	7.762	0.413947	540	33.002	1.76	540	16.829	0.897491	540	41.056	2.18952	540	5.077	0.270756	540	19.812	1.05657	540	31.532	1.6816	540	0	0	540	12.338	0.657986	540	7.008	0.373737	540	5.088	0.271343	540	16.031	0.854933	540	27.019	1.44092	540	17.67	0.942341	540	31.227
544	16.53	0.881545	544	10.595	0.565031	544	7.159	0.381789	544	32.58	1.73749	544	10.965	0.584763	544	36.667	1.95545	544	4.447	0.237159	544	13.4	0.714622	544	27.7	1.47724	544	7.52	0.401042	544	3.801	0.202707	544	8.876	0.473357	544	6.708	0.357738	544	14.981	0.798937	544	21.477	1.14537	544	17.003	0.90677	544	32.292
548	11	0.58663	548	8	0.42664	548	10.44	0.556765	548	32.349	1.72517	548	11.912	0.635267	548	29.031	1.54822	548	2	0.10666	548	19.612	1.04591	548	31.971	1.70501	548	7.81	0.416507	548	0	0	548	15.467	0.824855	548	4.346	0.231772	548	21.05	1.1226	548	17.755	0.946874	548	17.385	0.927142	548	25.441
552	0	0	552	6.5	0.346645	552	12.093	0.64492	552	38.787	2.06851	552	13.437	0.716595	552	20.467	1.09151	552	0	0	552	18.439	0.983352	552	28.145	1.50097	552	9.055	0.482903	552	4.679	0.249531	552	8.807	0.469677	552	5.217	0.278223	552	18.442	0.983512	552	11.63	0.620228	552	19.667	1.04884	552	20.292
556	0	0	556	13.647	0.727795	556	13.124	0.699903	556	44.623	2.37974	556	9.989	0.532713	556	9.428	0.502795	556	6.037	0.321953	556	14.714	0.784698	556	28.135	1.50044	556	9.894	0.527647	556	11.392	0.607535	556	4.069	0.217	556	3	0.15999	556	16.68	0.889544	556	0	0	556	20.677	1.1027	556	4.714
560	0	0	560	21.29	1.1354	560	10.966	0.584817	560	34.673	1.84911	560	18.682	0.996311	560	4.055	0.216253	560	9.672	0.515808	560	16.286	0.868532	560	26.086	1.39117	560	5.426	0.289369	560	11.571	0.617081	560	1.944	0.103674	560	8.007	0.427013	560	14.02	0.747687	560	0	0	560	21.975	1.17193	560	3.801
564	6.103	0.325473	564	16.867	0.899517	564	21.272	1.13444	564	32.503	1.73338	564	21.401	1.14132	564	0	0	564	4.714	0.251398	564	10.326	0.550686	564	24.466	1.30477	564	14.644	0.780965	564	14.051	0.74934	564	0	0	564	11.629	0.620175	564	15.348	0.818509	564	0	0	564	22.373	1.19315	564	3.801
568	2.5	0.133325	568	20.359	1.08575	568	23.022	1.22776	568	29.851	1.59195	568	20.507	1.09364	568	0	0	568	5.375	0.286649	568	6.49	0.346112	568	20.931	1.11625	568	13.149	0.701236	568	12.758	0.680384	568	0	0	568	12.758	0.680384	568	16.347	0.871786	568	0	0	568	19.379	1.03348	568	6.009
572	0	0	572	17.586	0.937861	572	26.306	1.4029	572	12.266	0.654146	572	21.512	1.14723	572	0	0	572	5.426	0.289369	572	5.884	0.313794	572	19.412	1.03524	572	15.878	0.846774	572	10.672	0.569138	572	8.028	0.428133	572	12.12	0.64636	572	17.401	0.927995	572	0	0	572	20.333	1.08436	572	11.005
576	0	0	576	22.142	1.18083	576	26.043	1.38887	576	22.216	1.18478	576	11.686	0.623214	576	0	0	576	6.438	0.343339	576	9.513	0.507328	576	22.081	1.17758	576	17.104	0.912156	576	15.442	0.823522	576	12.763	0.680651	576	13.876	0.740007	576	25.669	1.36893	576	0	0	576	18.679	0.996151	576	12.706
580	4	0.21332	580	24.749	1.31986	580	30.992	1.6528	580	22.669	1.20894	580	6.333	0.337739	580	0	0	580	4.447	0.237159	580	8.878	0.473464	580	20.359	1.08575	580	19.333	1.03103	580	15.709	0.837761	580	15.092	0.804856	580	14.267	0.760859	580	23.751	1.26664	580	0	0	580	16.003	0.85344	580	12.351
584	10.124	0.539913	584	25.48	1.35885	584	29.833	1.59099	584	24.777	1.32136	584	7.52	0.401042	584	0	0	584	0	0	584	8.139	0.434053	584	23.153	1.23475	584	12.53	0.668225	584	19.195	1.02367	584	14.174	0.755899	584	15.585	0.831148	584	19.678	1.04943	584	0	0	584	12.867	0.686197	584	14.761
588	11.18	0.596229	588	26.462	1.41122	588	24.698	1.31714	588	22.201	1.18398	588	8.233	0.439066	588	0	0	588	8.246	0.439759	588	12.166	0.648813	588	24.745	1.31965	588	9.843	0.524927	588	18.273	0.974499	588	15.808	0.843041	588	17.036	0.90853	588	20.044	1.06895	588	0	0	588	10.817	0.576871	588	10.225
592	13.416	0.715475	592	14.327	0.764059	592	30.083	1.60433	592	7.211	0.384563	592	6.7	0.357311	592	0	0	592	9.551	0.509355	592	13.252	0.706729	592	22.847	1.21843	592	7.454	0.397522	592	19.026	1.01466	592	18.622	0.993111	592	16.576	0.883998	592	19.474	1.03855	592	0	0	592	5.935	0.316514	592	15.074
596	15	0.79995	596	20.524	1.09454	596	31.89	1.70069	596	11.005	0.586897	596	12.445	0.663692	596	0	0	596	15.794	0.842294	596	10.006	0.53362	596	24.413	1.30195	596	5.548	0.295875	596	18	0.95994	596	18.215	0.971406	596	20.894	1.11428	596	17.867	0.952847	596	0	0	596	6.936	0.369897	596	21.911
600	7.159	0.381789	600	26.768	1.42754	600	26.387	1.40722	600	25.647	1.36775	600	14.761	0.787204	600	0	0	600	13.199	0.703903	600	11.516	0.614148	600	20.966	1.11812	600	10.419	0.555645	600	19.026	1.01466	600	20.537	1.09524	600	15.723	0.838508	600	18.196	0.970393	600	0	0	600	3.887	0.207294	600	25.641
Length stats
MAX	67.552	3.60255		37.62	2.00627		37.947	2.02371		44.623	2.37974		31.207	1.66427		50.413	2.68853		72.555	3.86936		35.442	1.89012		47.374	2.52646		28.985	1.54577		48.233	2.57227		55.141	2.94067		42.085	2.24439		36.223	1.93177		47.637	2.54048		49.944	2.66351		67.962
MIN	0	0		0	0		0	0		0	0		0	0		0	0		0	0		0	0		0	0		0	0		0	0		0	0		0	0		1.667	0.0889011		0	0		0	0		0
AVG	27.9836	1.49236		16.7609	0.893857		15.2856	0.815182		17.4203	0.929024		14.4462	0.770416		19.0896	1.01805		32.1267	1.71332		13.1901	0.70343		17.4277	0.929419		11.1166	0.592848		18.0202	0.961017		22.6021	1.20537		15.4241	0.822567		17.277	0.921381		18.8538	1.00548		21.3504	1.13862		27.035
MEDIAN	27.336	1.45783		16.867	0.899517		15.692	0.836854		17.951	0.957327		14.806	0.789604		19.607	1.04564		29.758	1.58699		12.137	0.647266		16.464	0.878025		10.44	0.556765		15.424	0.822562		21.218	1.13156		14.621	0.779738		16.68	0.889544		18.069	0.96362		19.88	1.0602		24.415
[truncated: 7 more columns]

## Sheet: V410A rates
Date	Section Number	Start Time	End Time	Start Length	End Length	Duration	L change	Polymerization rate	Depolymerization rate	sse	rsquare	dfe	adjrsquare	rmse	Rescue number	Rescue frequency	Catastrophe number	Catastrophe frequency	Total polymerization time	Total depolymerization time	Percent paused	Dynamicity		Polymerization average		Depolymerization average
'1'	1	28	120	14.773	65.485	92	50.712	33.073	0	214.657	0.95879	22	0.956917	3.12364	4	0.967742	4	0.638298	280	152	18.1818	0.804039
'1'	2	120	168	65.485	0	48	65.485	0	81.8563	147.573	0.973908	11	0.971536	3.66274	0	0	0	0	0	0	0	0
'1'	3	168	228	0	18.768	60	18.768	18.768	0	77.1547	0.87954	14	0.870936	2.34756	0	0	0	0	0	0	0	0
'1'	12	300	324	41.725	0	24	41.725	0	104.312	13.2821	0.990788	5	0.988945	1.62985	0	0	0	0	0	0	0	0
'1'	13	324	384	0	45.277	60	45.277	45.277	0	200.044	0.937157	14	0.932668	3.78006	0	0	0	0	0	0	0	0
'1'	14	384	432	45.277	16.101	48	29.176	0	36.47	88.9691	0.93057	11	0.924258	2.84396	0	0	0	0	0	0	0	0
'1'	19	456	524	13	54.601	68	41.601	36.7068	0	197.824	0.91511	16	0.909805	3.51625	0	0	0	0	0	0	0	0
'1'	20	524	556	54.601	0	32	54.601	0	102.377	59.7447	0.981936	7	0.979356	2.92147	0	0	0	0	0	0	0	0		33.4562		81.2539
'2'	2	56	80	11.424	0	24	11.424	0	28.56	19.442	0.881369	5	0.857643	1.9719	5	0.974026	4	0.566038	220	104	38.6364	0.531037
'2'	7	156	204	9.823	28.43	48	18.607	23.2587	0	56.4347	0.809158	11	0.791809	2.26504	0	0	0	0	0	0	0	0
'2'	8	204	228	28.43	6.671	24	21.759	0	54.3975	25.7234	0.947771	5	0.937326	2.26819	0	0	0	0	0	0	0	0
'2'	9	228	272	6.671	27.065	44	20.394	27.81	0	51.1812	0.909643	10	0.900608	2.26233	0	0	0	0	0	0	0	0
'2'	17	376	412	7.018	21.552	36	14.534	24.2233	0	29.0501	0.838243	8	0.818024	1.90559	0	0	0	0	0	0	0	0
'2'	20	436	460	29.3	6.021	24	23.279	0	58.1975	11.5719	0.97033	5	0.964396	1.52131	0	0	0	0	0	0	0	0
'2'	21	460	516	6.021	29.3	56	23.279	24.9418	0	121.154	0.864389	13	0.853957	3.0528	0	0	0	0	0	0	0	0
'2'	22	516	548	29.3	8	32	21.3	0	39.9375	11.8024	0.976785	7	0.973468	1.29848	0	0	0	0	0	0	0	0
'2'	23	548	584	8	25.48	36	17.48	29.1333	0	76.4118	0.802327	8	0.777617	3.09055	0	0	0	0	0	0	0	0		25.8734		45.2731
'3'	2	12	24	9.925	16.919	12	6.994	34.97	0	0.676805	0.973004	2	0.959506	0.581724	8	1.62162	5	0.641026	276	104	33.5664	0.640618
'3'	6	84	120	27.573	0	36	27.573	0	45.955	36.2577	0.964669	8	0.960253	2.1289	0	0	0	0	0	0	0	0
'3'	8	148	156	9	0	8	9	0	67.5	0.279936	0.993135	1	0.986271	0.52909	0	0	0	0	0	0	0	0
'3'	11	196	252	0	28.623	56	28.623	30.6675	0	119.521	0.890785	13	0.882384	3.03215	0	0	0	0	0	0	0	0
'3'	12	252	276	28.623	2	24	26.623	0	66.5575	43.6666	0.92567	5	0.910805	2.95522	0	0	0	0	0	0	0	0
'3'	13	276	324	2	20.18	48	18.18	22.725	0	96.1171	0.839616	11	0.825036	2.956	0	0	0	0	0	0	0	0
'3'	14	324	344	20.18	4.528	20	15.652	0	46.956	18.7183	0.902899	4	0.878624	2.16323	0	0	0	0	0	0	0	0
'3'	15	344	404	4.528	37.713	60	33.185	33.185	0	194.507	0.874799	14	0.865856	3.72737	0	0	0	0	0	0	0	0
'3'	17	420	448	15.692	28.535	28	12.843	27.5207	0	27.1981	0.867892	6	0.845874	2.12909	0	0	0	0	0	0	0	0
'3'	18	448	464	28.535	7.5	16	21.035	0	78.8812	76.7001	0.816733	3	0.755644	5.05635	0	0	0	0	0	0	0	0
'3'	19	464	476	7.5	18.446	12	10.946	54.73	0	15.5648	0.852109	2	0.778164	2.78969	0	0	0	0	0	0	0	0
'3'	22	484	496	10.012	19.906	12	9.894	49.47	0	1.90866	0.963549	2	0.945324	0.976899	0	0	0	0	0	0	0	0
'3'	27	536	584	6.946	29.833	48	22.887	28.6088	0	74.8518	0.923875	11	0.916955	2.60858	0	0	0	0	0	0	0	0		35.2346		61.1699
'4'	2	8	16	14.926	15.723	8	0.797	5.9775	0	0.0284282	0.917845	1	0.835691	0.168607	6	2.14286	3	0.387931	380	84	15.3285	0.525545
'4'	5	56	100	2.667	21.273	44	18.606	25.3718	0	83.3813	0.856614	10	0.842275	2.88758	0	0	0	0	0	0	0	0
'4'	7	144	236	5.217	35.217	92	30	19.5652	0	85.495	0.937883	22	0.93506	1.97133	0	0	0	0	0	0	0	0
'4'	8	236	260	35.217	3.399	24	31.818	0	79.545	20.5913	0.979088	5	0.974905	2.02935	0	0	0	0	0	0	0	0
'4'	9	260	292	3.399	22.755	32	19.356	36.2925	0	32.115	0.933551	7	0.924059	2.14193	0	0	0	0	0	0	0	0
'4'	10	292	324	22.755	0	32	22.755	0	42.6656	35.1336	0.934717	7	0.925391	2.24033	0	0	0	0	0	0	0	0
'4'	11	324	424	0	37.949	100	37.949	22.7694	0	182.327	0.944476	24	0.942162	2.75626	0	0	0	0	0	0	0	0
'4'	12	424	452	37.949	0	28	37.949	0	81.3193	22.803	0.984921	6	0.982408	1.94949	0	0	0	0	0	0	0	0
'4'	13	452	556	0	44.623	104	44.623	25.744	0	1120.92	0.835643	25	0.829069	6.69604	0	0	0	0	0	0	0	0		22.6201		67.8433
'5'	1	28	48	31.207	15.699	20	15.508	0	46.524	18.0845	0.921265	4	0.901582	2.1263	3	0.365854	9	1.51685	60	196	53.6232	0.684457
'5'	3	72	112	24.66	4	40	20.66	0	30.99	70.3765	0.879977	9	0.866642	2.79636	0	0	0	0	0	0	0	0
'5'	4	112	140	4	20.562	28	16.562	35.49	0	42.6266	0.866957	6	0.844783	2.66541	0	0	0	0	0	0	0	0
'5'	5	140	180	20.562	0	40	20.562	0	30.843	214.74	0.813887	9	0.793208	4.88467	0	0	0	0	0	0	0	0
'5'	7	232	240	16.333	8.246	8	8.087	0	60.6525	0.278642	0.991551	1	0.983102	0.527865	0	0	0	0	0	0	0	0
'5'	9	284	300	20.279	8.825	16	11.454	0	42.9525	24.5791	0.8239	3	0.7652	2.86235	0	0	0	0	0	0	0	0
'5'	14	352	364	11.377	20.011	12	8.634	43.17	0	6.22634	0.886015	2	0.829022	1.76442	0	0	0	0	0	0	0	0
'5'	15	364	396	20.011	10.138	32	9.873	0	18.5119	15.6692	0.863367	7	0.843848	1.49615	0	0	0	0	0	0	0	0
'5'	21	448	464	27.287	0	16	27.287	0	102.326	21.8561	0.957591	3	0.943454	2.69914	0	0	0	0	0	0	0	0
'5'	24	512	532	4.679	19.003	20	14.324	42.972	0	33.2768	0.859389	4	0.824237	2.8843	0	0	0	0	0	0	0	0
'5'	25	532	548	19.003	11.912	16	7.091	0	26.5912	8.21297	0.832681	3	0.776908	1.65459	0	0	0	0	0	0	0	0
'5'	27	572	580	21.512	6.333	8	15.179	0	113.843	3.33462	0.971868	1	0.943736	1.82609	0	0	0	0	0	0	0	0		40.544		52.5815
'6'	1	32	72	33.541	0	40	33.541	0	50.3115	131.321	0.93429	9	0.926989	3.81985	6	1.83673	4	0.606061	300	100	19.3548	0.655227
'6'	2	72	124	0	30.157	52	30.157	34.7965	0	147.615	0.88151	12	0.871636	3.50732	0	0	0	0	0	0	0	0
'6'	4	136	144	12.078	20.989	8	8.911	66.8325	0	5.2248	0.883707	1	0.767413	2.28578	0	0	0	0	0	0	0	0
'6'	7	192	208	29.038	0	16	29.038	0	108.892	52.1566	0.930691	3	0.907588	4.16959	0	0	0	0	0	0	0	0
'6'	8	208	232	0	13.437	24	13.437	33.5925	0	7.84355	0.951256	5	0.941507	1.25248	0	0	0	0	0	0	0	0
'6'	12	268	324	21.234	37.72	56	16.486	17.6636	0	75.612	0.879133	13	0.869835	2.4117	0	0	0	0	0	0	0	0
'6'	13	324	352	37.72	5.207	28	32.513	0	69.6707	56.4984	0.957158	6	0.950018	3.06862	0	0	0	0	0	0	0	0
'6'	14	352	392	5.207	26.401	40	21.194	31.791	0	137.375	0.833143	9	0.814604	3.9069	0	0	0	0	0	0	0	0
'6'	15	392	408	26.401	0	16	26.401	0	99.0037	17.1683	0.958217	3	0.944289	2.39223	0	0	0	0	0	0	0	0
'6'	16	408	528	0	50.413	120	50.413	25.2065	0	298.982	0.953046	29	0.951427	3.21088	0	0	0	0	0	0	0	0		34.9804		81.9696
'7'	1	20	28	23.781	15.063	8	8.718	0	65.385	0.556931	0.985556	1	0.971113	0.746278	7	1.94444	6	0.927835	340	168	8.63309	0.60425
'7'	2	28	108	15.063	48.448	80	33.385	25.0388	0	128.656	0.944084	19	0.941141	2.60219	0	0	0	0	0	0	0	0
'7'	3	108	136	48.448	26.335	28	22.113	0	47.385	155.996	0.804127	6	0.771481	5.09895	0	0	0	0	0	0	0	0
'7'	4	136	228	26.335	64.777	92	38.442	25.0709	0	53.2449	0.983443	22	0.982691	1.55571	0	0	0	0	0	0	0	0
'7'	7	228	236	64.777	59.21	8	5.567	0	41.7525	0.991454	0.939865	1	0.879731	0.995718	0	0	0	0	0	0	0	0
'7'	8	236	256	59.21	66.855	20	7.645	22.935	0	5.72106	0.89679	4	0.870987	1.19594	0	0	0	0	0	0	0	0
'7'	11	268	316	68.665	9.262	48	59.403	0	74.2537	272.224	0.959364	11	0.95567	4.9747	0	0	0	0	0	0	0	0
'7'	12	316	360	9.262	26.604	44	17.342	23.6482	0	43.0598	0.921458	10	0.913603	2.07509	0	0	0	0	0	0	0	0
'7'	13	360	380	26.604	10.899	20	15.705	0	47.115	42.5936	0.847116	4	0.808895	3.26319	0	0	0	0	0	0	0	0
'7'	14	380	436	10.899	39.023	56	28.124	30.1329	0	31.9888	0.970239	13	0.96795	1.56865	0	0	0	0	0	0	0	0
'7'	16	460	496	22.103	45.447	36	23.344	38.9067	0	75.6571	0.891387	8	0.87781	3.07525	0	0	0	0	0	0	0	0
'7'	17	496	552	45.447	0	56	45.447	0	48.6932	357.042	0.928971	13	0.923508	5.24069	0	0	0	0	0	0	0	0
'7'	19	564	576	4.714	6.438	12	1.724	8.62	0	0.154202	0.89843	2	0.847645	0.277671	0	0	0	0	0	0	0	0		24.9075		54.0974
'8'	1	8	52	0	24.852	44	24.852	33.8891	0	52.7877	0.934305	10	0.927735	2.29756	8	1.875	4	0.606061	256	116	27.3438	0.480121
'8'	2	52	72	24.852	7.004	20	17.848	0	53.544	34.7519	0.901311	4	0.876638	2.94754	0	0	0	0	0	0	0	0
'8'	5	84	92	5.755	8.201	8	2.446	18.345	0	0.095256	0.96914	1	0.93828	0.308636	0	0	0	0	0	0	0	0
'8'	7	124	200	0	33.765	76	33.765	26.6566	0	42.6734	0.981041	18	0.979988	1.53972	0	0	0	0	0	0	0	0
'8'	8	200	232	33.765	0	32	33.765	0	63.3094	172.568	0.888827	7	0.872945	4.96514	0	0	0	0	0	0	0	0
'8'	11	248	280	11.25	24.65	32	13.4	25.125	0	1.51933	0.991501	7	0.990287	0.465883	0	0	0	0	0	0	0	0
'8'	14	292	332	19.458	5.274	40	14.184	0	21.276	121.02	0.815754	9	0.795282	3.66696	0	0	0	0	0	0	0	0
'8'	15	332	360	5.274	12.068	28	6.794	14.5586	0	11.0295	0.823454	6	0.79403	1.35582	0	0	0	0	0	0	0	0
'8'	22	392	416	12.395	4.931	24	7.464	0	18.66	7.34951	0.847028	5	0.816433	1.2124	0	0	0	0	0	0	0	0
'8'	25	416	424	4.931	8.754	8	3.823	28.6725	0	0.234038	0.968968	1	0.937935	0.483774	0	0	0	0	0	0	0	0
'8'	27	452	500	4.272	19.693	48	15.421	19.2763	0	6.92393	0.979616	11	0.977763	0.793378	0	0	0	0	0	0	0	0
'8'	31	508	520	15.008	19.851	12	4.843	24.215	0	0.222009	0.984142	2	0.976213	0.333173	0	0	0	0	0	0	0	0		23.8422		39.1973
'9'	1	32	64	41.126	0	32	41.126	0	77.1112	191.012	0.922533	7	0.911467	5.22374	8	1.57895	6	0.978261	252	188	20.8633	0.60135
'9'	2	64	120	0	25.239	56	25.239	27.0418	0	48.7646	0.944221	13	0.93993	1.93678	0	0	0	0	0	0	0	0
'9'	3	120	144	25.239	11.524	24	13.715	0	34.2875	63.3635	0.807064	5	0.768476	3.55987	0	0	0	0	0	0	0	0
'9'	4	144	180	11.524	24.698	36	13.174	21.9567	0	5.67996	0.964801	8	0.960402	0.842612	0	0	0	0	0	0	0	0
'9'	5	180	204	24.698	0	24	24.698	0	61.745	35.9854	0.942943	5	0.931532	2.68274	0	0	0	0	0	0	0	0
'9'	7	256	268	19.105	0	12	19.105	0	95.525	1.92666	0.990035	2	0.985052	0.981493	0	0	0	0	0	0	0	0
'9'	8	268	344	0	38.833	76	38.833	30.6576	0	366.579	0.885972	18	0.879637	4.51282	0	0	0	0	0	0	0	0
'9'	11	356	412	34.823	3.717	56	31.106	0	33.3279	478.852	0.826306	13	0.812945	6.06917	0	0	0	0	0	0	0	0
'9'	14	412	420	3.717	8.162	8	4.445	33.3375	0	0.78554	0.926341	1	0.852682	0.886307	0	0	0	0	0	0	0	0
'9'	16	436	452	3.808	8.004	16	4.196	15.735	0	0.707297	0.948126	3	0.930835	0.485557	0	0	0	0	0	0	0	0
'9'	18	468	500	4.65	18.951	32	14.301	26.8144	0	13.3155	0.939724	7	0.931113	1.37921	0	0	0	0	0	0	0	0
'9'	20	520	540	12.435	31.532	20	19.097	57.291	0	29.79	0.874911	4	0.843638	2.72901	0	0	0	0	0	0	0	0
'9'	21	540	580	31.532	20.359	40	11.173	0	16.7595	30.9838	0.840701	9	0.823001	1.85544	0	0	0	0	0	0	0	0
'9'	22	580	588	20.359	24.745	8	4.386	32.895	0	0.240801	0.975576	1	0.951153	0.490714	0	0	0	0	0	0	0	0		30.7161		53.126
'10'	7	88	152	22.033	0	64	22.033	0	20.6559	93.8684	0.915721	15	0.910102	2.50158	4	0.631579	5	0.797872	128	132	48.8189	0.451512
'10'	8	152	216	0	16.138	64	16.138	15.1294	0	94.1976	0.867677	15	0.858855	2.50596	0	0	0	0	0	0	0	0
'10'	9	216	224	16.138	11.935	8	4.203	0	31.5225	0.0372882	0.995796	1	0.991592	0.193101	0	0	0	0	0	0	0	0
'10'	13	288	300	10.382	12.257	12	1.875	9.375	0	0.244854	0.867405	2	0.801108	0.349896	0	0	0	0	0	0	0	0
'10'	18	332	376	7.071	28.985	44	21.914	29.8827	0	106.777	0.850853	10	0.835938	3.26768	0	0	0	0	0	0	0	0
'10'	19	376	400	28.985	0	24	28.985	0	72.4625	15.8636	0.978709	5	0.974451	1.78122	0	0	0	0	0	0	0	0
'10'	20	400	408	0	6.412	8	6.412	48.09	0	4.82765	0.809819	1	0.619638	2.19719	0	0	0	0	0	0	0	0
'10'	25	448	464	10.919	6.642	16	4.277	0	16.0388	0.996337	0.927429	3	0.903239	0.576292	0	0	0	0	0	0	0	0
'10'	33	576	596	17.104	5.548	20	11.556	0	34.668	15.1032	0.897289	4	0.871611	1.94314	0	0	0	0	0	0	0	0		25.6193		35.0695
'11'	1	28	76	4.807	15.691	48	10.884	13.605	0	69.1969	0.822227	11	0.806066	2.50811	10	2.94118	5	0.700935	360	136	12.0567	0.496014
'11'	2	76	88	15.691	22.689	12	6.998	34.99	0	0.927189	0.963226	2	0.944839	0.680878	0	0	0	0	0	0	0	0
'11'	4	88	120	22.689	6.6	32	16.089	0	30.1669	116.709	0.807186	7	0.779641	4.08322	0	0	0	0	0	0	0	0
'11'	5	120	152	6.6	15.766	32	9.166	17.1863	0	3.72051	0.947794	7	0.940336	0.729042	0	0	0	0	0	0	0	0
'11'	9	184	224	11.87	22.689	40	10.819	16.2285	0	10.6195	0.931366	9	0.92374	1.08625	0	0	0	0	0	0	0	0
'11'	10	224	240	22.689	7.311	16	15.378	0	57.6675	4.39724	0.974923	3	0.966563	1.21068	0	0	0	0	0	0	0	0
'11'	11	240	264	7.311	14.349	24	7.038	17.595	0	6.94647	0.82885	5	0.79462	1.17868	0	0	0	0	0	0	0	0
'11'	12	264	284	14.349	6.146	20	8.203	0	24.609	9.55391	0.841262	4	0.801578	1.54547	0	0	0	0	0	0	0	0
'11'	13	284	400	6.146	44.754	116	38.608	19.9697	0	109.123	0.977422	28	0.976615	1.97415	0	0	0	0	0	0	0	0
'11'	14	400	444	44.754	4.534	44	40.22	0	54.8455	122.981	0.958007	10	0.953808	3.50686	0	0	0	0	0	0	0	0
'11'	15	444	456	4.534	11.667	12	7.133	35.665	0	0.406661	0.984974	2	0.977461	0.450922	0	0	0	0	0	0	0	0
'11'	17	472	484	7.318	21.378	12	14.06	70.3	0	5.25981	0.959473	2	0.939209	1.6217	0	0	0	0	0	0	0	0
'11'	19	504	524	9.667	26.034	20	16.367	49.101	0	11.3397	0.943557	4	0.929446	1.68372	0	0	0	0	0	0	0	0
'11'	20	524	548	26.034	0	24	26.034	0	65.085	93.5053	0.875151	5	0.850181	4.32447	0	0	0	0	0	0	0	0
'11'	21	548	592	0	19.026	44	19.026	25.9445	0	71.8841	0.80272	10	0.782992	2.68112	0	0	0	0	0	0	0	0		30.0585		46.4748
'12'	1	12	36	18.333	0	24	18.333	0	45.8325	35.8092	0.909994	5	0.891993	2.67616	5	1.66667	5	0.735294	368	140	7.29927	0.610087
'12'	2	36	128	0	32.872	92	32.872	21.4383	0	80.2158	0.976444	22	0.975373	1.9095	0	0	0	0	0	0	0	0
'12'	4	128	184	32.872	48.791	56	15.919	17.0561	0	37.8267	0.934735	13	0.929714	1.7058	0	0	0	0	0	0	0	0
'12'	5	184	208	48.791	10.296	24	38.495	0	96.2375	15.765	0.98815	5	0.98578	1.77567	0	0	0	0	0	0	0	0
'12'	6	208	308	10.296	52.979	100	42.683	25.6098	0	89.1606	0.978085	24	0.977172	1.92744	0	0	0	0	0	0	0	0
'12'	7	308	356	52.979	0	48	52.979	0	66.2237	335.779	0.943075	11	0.9379	5.52497	0	0	0	0	0	0	0	0
'12'	8	356	444	0	42.715	88	42.715	29.1239	0	252.405	0.929688	21	0.92634	3.46688	0	0	0	0	0	0	0	0
'12'	9	444	476	42.715	0	32	42.715	0	80.0906	64.0026	0.971575	7	0.967514	3.02378	0	0	0	0	0	0	0	0
'12'	10	476	508	0	9.69	32	9.69	18.1687	0	5.91921	0.953556	7	0.946921	0.919566	0	0	0	0	0	0	0	0
'12'	13	548	560	15.467	1.944	12	13.523	0	67.615	5.16543	0.952084	2	0.928126	1.60708	0	0	0	0	0	0	0	0		22.2793		71.1999
'13'	1	28	80	0	19.151	52	19.151	22.0973	0	15.7749	0.96135	12	0.958129	1.14655	5	0.862069	4	0.526316	220	112	41.5493	0.480027
'13'	2	80	108	19.151	0	28	19.151	0	41.0379	44.8121	0.883497	6	0.86408	2.73289	0	0	0	0	0	0	0	0
'13'	5	180	220	26.543	41.2	40	14.657	21.9855	0	67.1849	0.838275	9	0.820306	2.73221	0	0	0	0	0	0	0	0
'13'	6	220	264	41.2	3.606	44	37.594	0	51.2645	109.307	0.956184	10	0.951802	3.30615	0	0	0	0	0	0	0	0
'13'	7	264	292	3.606	17.904	28	14.298	30.6386	0	40.5284	0.809535	6	0.777791	2.59899	0	0	0	0	0	0	0	0
'13'	10	324	336	20.562	12.374	12	8.188	0	40.94	3.10273	0.90788	2	0.86182	1.24554	0	0	0	0	0	0	0	0
'13'	21	468	520	9.41	21.769	52	12.359	14.2604	0	25.2144	0.857761	12	0.845907	1.44955	0	0	0	0	0	0	0	0
'13'	22	520	548	21.769	4.346	28	17.423	0	37.335	80.3504	0.812291	6	0.781006	3.65947	0	0	0	0	0	0	0	0
'13'	23	548	596	4.346	20.894	48	16.548	20.685	0	29.0749	0.916725	11	0.909154	1.62578	0	0	0	0	0	0	0	0		21.9334		42.6444
'14'	2	44	64	4.216	15.18	20	10.964	32.892	0	11.1592	0.875496	4	0.84437	1.67027	8	1.57895	5	0.688073	232	100	38.0597	0.599696
'14'	10	108	116	4.714	9.171	8	4.457	33.4275	0	1.61305	0.860287	1	0.720574	1.27006	0	0	0	0	0	0	0	0
'14'	12	136	164	1.667	20.423	28	18.756	40.1914	0	42.9159	0.872949	6	0.851774	2.67444	0	0	0	0	0	0	0	0
'14'	14	204	216	9.171	19.805	12	10.634	53.17	0	5.7285	0.917554	2	0.87633	1.69241	0	0	0	0	0	0	0	0
'14'	16	216	228	19.805	10.05	12	9.755	0	48.775	1.57265	0.96765	2	0.951476	0.886751	0	0	0	0	0	0	0	0
'14'	18	228	276	10.05	36.223	48	26.173	32.7163	0	63.5927	0.909902	11	0.901711	2.4044	0	0	0	0	0	0	0	0
'14'	19	276	296	36.223	10.919	20	25.304	0	75.912	23.1146	0.958434	4	0.948042	2.40388	0	0	0	0	0	0	0	0
'14'	25	396	424	31.157	14.016	28	17.141	0	36.7307	27.6092	0.883811	6	0.864446	2.14512	0	0	0	0	0	0	0	0
'14'	26	424	480	14.016	33.668	56	19.652	21.0557	0	49.8377	0.928532	13	0.923034	1.95798	0	0	0	0	0	0	0	0
'14'	27	480	512	33.668	5	32	28.668	0	53.7525	68.944	0.942576	7	0.934373	3.13833	0	0	0	0	0	0	0	0
'14'	28	512	552	5	18.442	40	13.442	20.163	0	23.8334	0.92653	9	0.918366	1.62732	0	0	0	0	0	0	0	0
'14'	31	552	560	18.442	14.02	8	4.422	0	33.165	0.134401	0.98644	1	0.97288	0.366607	0	0	0	0	0	0	0	0
'14'	32	560	580	14.02	23.751	20	9.731	29.193	0	21.452	0.81252	4	0.76565	2.31582	0	0	0	0	0	0	0	0		32.8511		49.667
'15'	1	32	104	16.325	47.637	72	31.312	26.0933	0	64.6519	0.967538	17	0.965628	1.95014	6	2.43243	5	0.872093	344	148	0	0.556024
'15'	2	104	144	47.637	5.701	40	41.936	0	62.904	18.5629	0.990917	9	0.989908	1.43616	0	0	0	0	0	0	0	0
'15'	3	144	196	5.701	33.515	52	27.814	32.0931	0	54.1035	0.956389	12	0.952755	2.12335	0	0	0	0	0	0	0	0
'15'	4	196	244	33.515	0	48	33.515	0	41.8937	86.9963	0.951071	11	0.946623	2.81225	0	0	0	0	0	0	0	0
'15'	5	244	332	0	29.017	88	29.017	19.7843	0	153.204	0.920352	21	0.916559	2.701	0	0	0	0	0	0	0	0
'15'	6	332	356	29.017	8.016	24	21.001	0	52.5025	15.3849	0.96461	5	0.957532	1.75413	0	0	0	0	0	0	0	0
'15'	7	356	388	8.016	24.052	32	16.036	30.0675	0	18.6863	0.922486	7	0.911413	1.63385	0	0	0	0	0	0	0	0
'15'	8	388	416	24.052	8.078	28	15.974	0	34.23	33.5137	0.861499	6	0.838415	2.36339	0	0	0	0	0	0	0	0
'15'	9	416	444	8.078	23.564	28	15.486	33.1843	0	31.1486	0.889937	6	0.871593	2.27847	0	0	0	0	0	0	0	0
'15'	10	444	452	23.564	8.631	8	14.933	0	111.998	0.0547215	0.999509	1	0.999019	0.233926	0	0	0	0	0	0	0	0
'15'	11	452	524	8.631	35.171	72	26.54	22.1167	0	32.5039	0.974265	17	0.972751	1.38275	0	0	0	0	0	0	0	0		27.2232		60.7055
'16'	1	12	40	30.806	12.649	28	18.157	0	38.9079	20.7876	0.934425	6	0.923496	1.86134	6	1.55172	6	1.01124	320	196	6.52174	0.45686
'16'	2	40	80	12.649	25.055	40	12.406	18.609	0	19.8316	0.898867	9	0.88763	1.48442	0	0	0	0	0	0	0	0
'16'	6	96	148	18.918	33.213	52	14.295	16.4942	0	18.1121	0.91189	12	0.904547	1.22855	0	0	0	0	0	0	0	0
'16'	7	148	192	33.213	0	44	33.213	0	45.2905	52.7589	0.964166	10	0.960583	2.29693	0	0	0	0	0	0	0	0
'16'	9	212	220	16.72	9.153	8	7.567	0	56.7525	0.1353	0.995296	1	0.990593	0.367832	0	0	0	0	0	0	0	0
'16'	10	220	248	9.153	22.718	28	13.565	29.0679	0	14.3315	0.90066	6	0.884103	1.5455	0	0	0	0	0	0	0	0
'16'	13	248	280	22.718	4.643	32	18.075	0	33.8906	24.8203	0.935804	7	0.926633	1.88302	0	0	0	0	0	0	0	0
'16'	14	280	388	4.643	49.944	108	45.301	25.1672	0	272.021	0.93125	26	0.928606	3.23456	0	0	0	0	0	0	0	0
'16'	15	388	452	49.944	11.705	64	38.239	0	35.8491	68.0315	0.969245	15	0.967195	2.12966	0	0	0	0	0	0	0	0
'16'	16	452	472	11.705	16.014	20	4.309	12.927	0	1.91436	0.815346	4	0.769183	0.691802	0	0	0	0	0	0	0	0
'16'	17	472	492	16.014	3.887	20	12.127	0	36.381	3.73004	0.968475	4	0.960594	0.965666	0	0	0	0	0	0	0	0
'16'	18	492	564	3.887	22.373	72	18.486	15.405	0	15.0783	0.974383	17	0.972877	0.941786	0	0	0	0	0	0	0	0		19.6117		41.1786
'17'	2	12	20	19.105	21.401	8	2.296	17.22	0	0.273921	0.90586	1	0.811721	0.523374	5	1.5625	5	0.789474	360	172	3.62319	0.634265
'17'	5	40	72	28.79	0	32	28.79	0	53.9813	22.652	0.974196	7	0.97051	1.79889	0	0	0	0	0	0	0	0
'17'	6	72	140	0	25.386	68	25.386	22.3994	0	195.888	0.87165	16	0.863628	3.499	0	0	0	0	0	0	0	0
'17'	7	140	164	25.386	5.088	24	20.298	0	50.745	13.586	0.961363	5	0.953636	1.64839	0	0	0	0	0	0	0	0
'17'	8	164	312	5.088	67.897	148	62.809	25.4631	0	88.534	0.994334	36	0.994177	1.56821	0	0	0	0	0	0	0	0
'17'	9	312	372	67.897	5.27	60	62.627	0	62.627	178.874	0.969249	14	0.967053	3.57445	0	0	0	0	0	0	0	0
'17'	10	372	488	5.27	53.384	116	48.114	24.8866	0	197.046	0.95692	28	0.955381	2.6528	0	0	0	0	0	0	0	0
'17'	11	488	512	53.384	24.342	24	29.042	0	72.605	168.294	0.849644	5	0.819573	5.80163	0	0	0	0	0	0	0	0
'17'	12	512	532	24.342	43.105	20	18.763	56.289	0	16.7367	0.938911	4	0.923639	2.04553	0	0	0	0	0	0	0	0
'17'	13	532	564	43.105	3.801	32	39.304	0	73.695	132.485	0.923676	7	0.912773	4.35046	0	0	0	0	0	0	0	0		29.2516		62.7307
'18'	5	28	44	19.003	24.24	16	5.237	19.6388	0	4.07364	0.84653	3	0.795374	1.16528	7	1.64062	5	0.949367	216	156	21.1864	0.43604
'18'	8	100	112	25.144	12.078	12	13.066	0	65.33	27.9979	0.823689	2	0.735534	3.74152	0	0	0	0	0	0	0	0
'18'	9	112	132	12.078	25.942	20	13.864	41.592	0	11.3994	0.925471	4	0.906839	1.68815	0	0	0	0	0	0	0	0
'18'	10	132	176	25.942	7.401	44	18.541	0	25.2832	37.6468	0.904224	10	0.894646	1.94028	0	0	0	0	0	0	0	0
'18'	11	176	192	7.401	18.409	16	11.008	41.28	0	2.97664	0.968342	3	0.957789	0.996099	0	0	0	0	0	0	0	0
'18'	12	192	224	18.409	6.128	32	12.281	0	23.0269	22.3459	0.879735	7	0.862554	1.78669	0	0	0	0	0	0	0	0
'18'	13	224	304	6.128	29.935	80	23.807	17.8553	0	151.05	0.911835	19	0.907195	2.81957	0	0	0	0	0	0	0	0
'18'	14	304	340	29.935	7.341	36	22.594	0	37.6567	21.1466	0.963651	8	0.959108	1.62583	0	0	0	0	0	0	0	0
'18'	15	340	380	7.341	18.856	40	11.515	17.2725	0	15.074	0.909103	9	0.899003	1.29418	0	0	0	0	0	0	0	0
'18'	16	380	412	18.856	9.055	32	9.801	0	18.3769	15.3192	0.866437	7	0.847356	1.47934	0	0	0	0	0	0	0	0
'18'	17	412	444	9.055	22.75	32	13.695	25.6781	0	28.9389	0.81803	7	0.792034	2.03326	0	0	0	0	0	0	0	0
'18'	23	488	500	14	20.798	12	6.798	33.99	0	6.63383	0.81792	2	0.72688	1.82124	0	0	0	0	0	0	0	0		28.1867		33.9347
'19'	1	40	68	24.608	5.207	28	19.401	0	41.5736	36.1806	0.927588	6	0.915519	2.45563	8	1.73913	8	1.2766	280	180	17.2662	0.456685
'19'	2	68	132	5.207	25.701	64	20.494	19.2131	0	18.7023	0.967032	15	0.964834	1.11661	0	0	0	0	0	0	0	0
'19'	3	132	148	25.701	8.498	16	17.203	0	64.5113	0.879173	0.995479	3	0.993972	0.541348	0	0	0	0	0	0	0	0
'19'	4	148	188	8.498	24.449	40	15.951	23.9265	0	8.49975	0.970496	9	0.967218	0.971811	0	0	0	0	0	0	0	0
'19'	5	188	212	24.449	6.412	24	18.037	0	45.0925	24.0707	0.904746	5	0.885695	2.19411	0	0	0	0	0	0	0	0
'19'	6	212	228	6.412	15.709	16	9.297	34.8638	0	8.67615	0.854479	3	0.805971	1.7006	0	0	0	0	0	0	0	0
'19'	11	240	252	8.062	6.289	12	1.773	0	8.865	0.275622	0.86956	2	0.80434	0.371229	0	0	0	0	0	0	0	0
'19'	12	252	296	6.289	15.766	44	9.477	12.9232	0	17.0158	0.850215	10	0.835236	1.30445	0	0	0	0	0	0	0	0
'19'	15	296	324	15.766	3.35	28	12.416	0	26.6057	21.3429	0.873355	6	0.852247	1.88604	0	0	0	0	0	0	0	0
'19'	16	324	348	3.35	8.36	24	5.01	12.525	0	1.38843	0.923575	5	0.90829	0.52696	0	0	0	0	0	0	0	0
'19'	20	404	440	8.769	24.515	36	15.746	26.2433	0	73.6834	0.840181	8	0.820203	3.03487	0	0	0	0	0	0	0	0
'19'	21	440	464	24.515	5.207	24	19.308	0	48.27	12.3672	0.964144	5	0.956973	1.57272	0	0	0	0	0	0	0	0
'19'	22	464	500	5.207	20.747	36	15.54	25.9	0	16.0558	0.942504	8	0.935317	1.41668	0	0	0	0	0	0	0	0
'19'	23	500	532	20.747	6.009	32	14.738	0	27.6337	49.7433	0.833186	7	0.809356	2.66574	0	0	0	0	0	0	0	0
'19'	24	532	552	6.009	14.337	20	8.328	24.984	0	8.38384	0.829411	4	0.786763	1.44774	0	0	0	0	0	0	0	0
'19'	27	580	596	16.125	8.769	16	7.356	0	27.585	2.40974	0.945321	3	0.927095	0.89624	0	0	0	0	0	0	0	0		22.5724		36.2671
