# Supplementary material for: TUBA1A tubulinopathy mutants disrupt neuron morphogenesis and override XMAP215/Stu2 regulation of microtubule dynamics
Source: eLife. 2022 May 5;11:e76189. doi: 10.7554/eLife.76189 (PMC9236607; doi:10.7554/eLife.76189)
Supplement: Figure 4—source data 2. [file elife-76189-fig4-data2.xlsx]

## Sheet: 4764
4764_0'_#.nd2																	4764_0'_#003.nd2																	4764_15'_#001.nd2
Type	Slice	X	Y	Value	C-pos	Z-pos	T-pos	X(pixel)	Y(pixel)	Z(pixel)		Key	Number	Proportion			Type	Slice	X	Y	Value	C-pos	Z-pos	T-pos	X(pixel)	Y(pixel)	Z(pixel)		Key	Number	Proportion			Type	Slice	X	Y	Value	C-pos	Z-pos	T-pos	X(pixel)	Y(pixel)	Z(pixel)		Key	Number	Proportion
1	2	483	72	1534	2	1	1	483	72	0		1=astrals	129	0.460714			1	2	30	42	976	2	1	1	1.95	2.73	0		1=astrals	139	0.461794			1	2	27	171	1053	2	1	1	1.755	11.115	0		1=astrals	34	0.147186
1	2	582	39	1520	2	1	1	582	39	0		2=no astrals	151	0.539286			1	2	105	66	907	2	1	1	6.825	4.29	0		2=no astrals	162	0.538206			1	2	225	348	1089	2	1	1	14.625	22.62	0		2=no astrals	197	0.852814
1	2	636	69	1523	2	1	1	636	69	0		Total	280				1	2	180	33	940	2	1	1	11.7	2.145	0		Total	301				1	2	216	417	1147	2	1	1	14.04	27.105	0		Total	231
1	2	618	147	1492	2	1	1	618	147	0							1	2	135	207	928	2	1	1	8.775	13.455	0							1	2	288	564	1022	2	1	1	18.72	36.66	0
1	2	750	54	1537	2	1	1	750	54	0							1	2	207	201	937	2	1	1	13.455	13.065	0							1	2	300	720	1067	2	1	1	19.5	46.8	0
1	2	864	66	1710	2	1	1	864	66	0							1	2	486	69	994	2	1	1	31.59	4.485	0							1	2	249	828	1106	2	1	1	16.185	53.82	0
1	2	786	285	1631	2	1	1	786	285	0							1	2	78	372	913	2	1	1	5.07	24.18	0							1	2	261	1320	1103	2	1	1	16.965	85.8	0
1	2	1302	96	1449	2	1	1	1302	96	0							1	2	399	333	893	2	1	1	25.935	21.645	0							1	2	195	1701	1055	2	1	1	12.675	110.565	0
1	2	1425	279	1457	2	1	1	1425	279	0							1	2	63	519	898	2	1	1	4.095	33.735	0							1	2	165	1776	1031	2	1	1	10.725	115.44	0
1	2	1614	96	1541	2	1	1	1614	96	0							1	2	204	738	1016	2	1	1	13.26	47.97	0							1	2	42	1872	1053	2	1	1	2.73	121.68	0
1	2	1926	141	1488	2	1	1	1926	141	0							1	2	81	675	997	2	1	1	5.265	43.875	0							1	2	552	1839	999	2	1	1	35.88	119.535	0
1	2	1983	282	1472	2	1	1	1983	282	0							1	2	204	939	867	2	1	1	13.26	61.035	0							1	2	480	1368	1100	2	1	1	31.2	88.92	0
1	2	1893	303	1495	2	1	1	1893	303	0							1	2	279	933	971	2	1	1	18.135	60.645	0							1	2	456	1002	1071	2	1	1	29.64	65.13	0
1	2	1719	231	1520	2	1	1	1719	231	0							1	2	300	837	957	2	1	1	19.5	54.405	0							1	2	615	261	1058	2	1	1	39.975	16.965	0
1	2	1680	300	1466	2	1	1	1680	300	0							1	2	417	564	883	2	1	1	27.105	36.66	0							1	2	813	105	1159	2	1	1	52.845	6.825	0
1	2	1863	426	1611	2	1	1	1863	426	0							1	2	510	912	1003	2	1	1	33.15	59.28	0							1	2	942	267	1012	2	1	1	61.23	17.355	0
1	2	2004	366	1592	2	1	1	2004	366	0							1	2	537	717	949	2	1	1	34.905	46.605	0							1	2	891	477	1156	2	1	1	57.915	31.005	0
1	2	1977	495	1518	2	1	1	1977	495	0							1	2	75	1098	957	2	1	1	4.875	71.37	0							1	2	825	321	1082	2	1	1	53.625	20.865	0
1	2	1926	417	1570	2	1	1	1926	417	0							1	2	375	1107	1250	2	1	1	24.375	71.955	0							1	2	1095	1530	1115	2	1	1	71.175	99.45	0
1	2	1674	381	1428	2	1	1	1674	381	0							1	2	504	1071	896	2	1	1	32.76	69.615	0							1	2	966	1518	1052	2	1	1	62.79	98.67	0
1	2	1566	306	1440	2	1	1	1566	306	0							1	2	195	1215	863	2	1	1	12.675	78.975	0							1	2	1071	1623	1075	2	1	1	69.615	105.495	0
1	2	1737	462	1532	2	1	1	1737	462	0							1	2	159	1425	940	2	1	1	10.335	92.625	0							1	2	1278	1887	973	2	1	1	83.07	122.655	0
1	2	1794	546	1457	2	1	1	1794	546	0							1	2	324	1380	900	2	1	1	21.06	89.7	0							1	2	1182	1968	984	2	1	1	76.83	127.92	0
1	2	2028	588	1473	2	1	1	2028	588	0							1	2	441	1272	883	2	1	1	28.665	82.68	0							1	2	1548	1797	1058	2	1	1	100.62	116.805	0
1	2	1554	474	1411	2	1	1	1554	474	0							1	2	456	1146	892	2	1	1	29.64	74.49	0							1	2	1941	1896	942	2	1	1	126.165	123.24	0
1	2	1161	240	1481	2	1	1	1161	240	0							1	2	282	1563	868	2	1	1	18.33	101.595	0							1	2	1902	1293	1067	2	1	1	123.63	84.045	0
1	2	1236	228	1465	2	1	1	1236	228	0							1	2	369	1458	854	2	1	1	23.985	94.77	0							1	2	1284	1356	951	2	1	1	83.46	88.14	0
1	2	1308	237	1411	2	1	1	1308	237	0							1	2	228	1671	868	2	1	1	14.82	108.615	0							1	2	1275	1074	1057	2	1	1	82.875	69.81	0
1	2	1035	333	1503	2	1	1	1035	333	0							1	2	153	1602	850	2	1	1	9.945	104.13	0							1	2	1989	789	1096	2	1	1	129.285	51.285	0
1	2	474	390	1645	2	1	1	474	390	0							1	2	183	1722	944	2	1	1	11.895	111.93	0							1	2	1938	849	991	2	1	1	125.97	55.185	0
1	2	402	354	1478	2	1	1	402	354	0							1	2	231	1815	1018	2	1	1	15.015	117.975	0							1	2	1092	735	1060	2	1	1	70.98	47.775	0
1	2	345	435	1522	2	1	1	345	435	0							1	2	99	1716	875	2	1	1	6.435	111.54	0							1	2	1533	231	1105	2	1	1	99.645	15.015	0
1	2	399	453	1474	2	1	1	399	453	0							1	2	63	1893	878	2	1	1	4.095	123.045	0							1	2	1848	183	1170	2	1	1	120.12	11.895	0
1	2	39	390	1558	2	1	1	39	390	0							1	2	123	2010	944	2	1	1	7.995	130.65	0							1	2	1731	54	1051	2	1	1	112.515	3.51	0
1	2	69	585	1457	2	1	1	69	585	0							1	2	222	1950	928	2	1	1	14.43	126.75	0							2	2	87	48	1039	2	1	1	5.655	3.12	0
1	2	54	711	1460	2	1	1	54	711	0							1	2	345	1956	937	2	1	1	22.425	127.14	0							2	2	99	108	1085	2	1	1	6.435	7.02	0
1	2	276	615	1422	2	1	1	276	615	0							1	2	273	2031	868	2	1	1	17.745	132.015	0							2	2	162	165	1089	2	1	1	10.53	10.725	0
1	2	447	576	1394	2	1	1	447	576	0							1	2	291	1941	875	2	1	1	18.915	126.165	0							2	2	222	120	1087	2	1	1	14.43	7.8	0
1	2	426	789	1401	2	1	1	426	789	0							1	2	303	1860	929	2	1	1	19.695	120.9	0							2	2	240	42	1095	2	1	1	15.6	2.73	0
1	2	384	915	1567	2	1	1	384	915	0							1	2	654	1926	933	2	1	1	42.51	125.19	0							2	2	318	21	1052	2	1	1	20.67	1.365	0
1	2	279	1020	1835	2	1	1	279	1020	0							1	2	837	2025	960	2	1	1	54.405	131.625	0							2	2	237	288	1063	2	1	1	15.405	18.72	0
1	2	450	1077	1471	2	1	1	450	1077	0							1	2	915	2016	1033	2	1	1	59.475	131.04	0							2	2	378	264	1104	2	1	1	24.57	17.16	0
1	2	195	1284	1539	2	1	1	195	1284	0							1	2	864	1962	1097	2	1	1	56.16	127.53	0							2	2	357	186	983	2	1	1	23.205	12.09	0
1	2	132	1326	1414	2	1	1	132	1326	0							1	2	585	1821	854	2	1	1	38.025	118.365	0							2	2	102	426	1027	2	1	1	6.63	27.69	0
1	2	30	1524	1526	2	1	1	30	1524	0							1	2	798	1728	910	2	1	1	51.87	112.32	0							2	2	492	288	1077	2	1	1	31.98	18.72	0
1	2	138	1680	1441	2	1	1	138	1680	0							1	2	735	1734	1105	2	1	1	47.775	112.71	0							2	2	390	489	1177	2	1	1	25.35	31.785	0
1	2	93	1986	1453	2	1	1	93	1986	0							1	2	870	1842	984	2	1	1	56.55	119.73	0							2	2	342	369	1092	2	1	1	22.23	23.985	0
1	2	402	1977	1594	2	1	1	402	1977	0							1	2	450	1734	912	2	1	1	29.25	112.71	0							2	2	72	654	1091	2	1	1	4.68	42.51	0
1	2	516	1926	1396	2	1	1	516	1926	0							1	2	552	1653	943	2	1	1	35.88	107.445	0							2	2	69	768	1082	2	1	1	4.485	49.92	0
1	2	540	1851	1471	2	1	1	540	1851	0							1	2	627	1587	936	2	1	1	40.755	103.155	0							2	2	252	651	1159	2	1	1	16.38	42.315	0
1	2	438	1842	1544	2	1	1	438	1842	0							1	2	564	1584	953	2	1	1	36.66	102.96	0							2	2	171	894	1026	2	1	1	11.115	58.11	0
1	2	429	1254	1489	2	1	1	429	1254	0							1	2	810	1533	953	2	1	1	52.65	99.645	0							2	2	252	948	1038	2	1	1	16.38	61.62	0
1	2	576	1323	1444	2	1	1	576	1323	0							1	2	501	1374	984	2	1	1	32.565	89.31	0							2	2	186	1101	1060	2	1	1	12.09	71.565	0
1	2	651	1416	1452	2	1	1	651	1416	0							1	2	507	1443	841	2	1	1	32.955	93.795	0							2	2	381	1113	1092	2	1	1	24.765	72.345	0
1	2	759	1944	1497	2	1	1	759	1944	0							1	2	663	1437	900	2	1	1	43.095	93.405	0							2	2	300	1065	982	2	1	1	19.5	69.225	0
1	2	816	1887	1440	2	1	1	816	1887	0							1	2	693	1380	967	2	1	1	45.045	89.7	0							2	2	150	1443	983	2	1	1	9.75	93.795	0
1	2	843	1665	1550	2	1	1	843	1665	0							1	2	720	1161	929	2	1	1	46.8	75.465	0							2	2	234	1401	1052	2	1	1	15.21	91.065	0
1	2	579	1005	1447	2	1	1	579	1005	0							1	2	858	1188	1109	2	1	1	55.77	77.22	0							2	2	42	1383	1209	2	1	1	2.73	89.895	0
1	2	1902	711	1420	2	1	1	1902	711	0							1	2	780	1413	944	2	1	1	50.7	91.845	0							2	2	183	1518	1101	2	1	1	11.895	98.67	0
1	2	1614	741	1475	2	1	1	1614	741	0							1	2	873	1290	868	2	1	1	56.745	83.85	0							2	2	111	1497	1008	2	1	1	7.215	97.305	0
1	2	1581	795	1601	2	1	1	1581	795	0							1	2	732	1077	948	2	1	1	47.58	70.005	0							2	2	330	1446	1043	2	1	1	21.45	93.99	0
1	2	1242	783	1522	2	1	1	1242	783	0							1	2	819	1077	964	2	1	1	53.235	70.005	0							2	2	417	1437	1121	2	1	1	27.105	93.405	0
1	2	963	891	1554	2	1	1	963	891	0							1	2	792	987	938	2	1	1	51.48	64.155	0							2	2	378	1350	1026	2	1	1	24.57	87.75	0
1	2	1272	963	1501	2	1	1	1272	963	0							1	2	765	825	889	2	1	1	49.725	53.625	0							2	2	345	1299	1104	2	1	1	22.425	84.435	0
1	2	1578	948	1630	2	1	1	1578	948	0							1	2	834	888	942	2	1	1	54.21	57.72	0							2	2	282	1578	1016	2	1	1	18.33	102.57	0
1	2	1920	915	1435	2	1	1	1920	915	0							1	2	906	939	975	2	1	1	58.89	61.035	0							2	2	267	1515	1039	2	1	1	17.355	98.475	0
1	2	864	1131	1534	2	1	1	864	1131	0							1	2	951	873	942	2	1	1	61.815	56.745	0							2	2	417	1542	1114	2	1	1	27.105	100.23	0
1	2	897	1203	1479	2	1	1	897	1203	0							1	2	825	681	990	2	1	1	53.625	44.265	0							2	2	372	1608	992	2	1	1	24.18	104.52	0
1	2	1083	1239	1605	2	1	1	1083	1239	0							1	2	783	582	1026	2	1	1	50.895	37.83	0							2	2	108	1761	1135	2	1	1	7.02	114.465	0
1	2	1569	1287	1502	2	1	1	1569	1287	0							1	2	738	615	987	2	1	1	47.97	39.975	0							2	2	108	1683	998	2	1	1	7.02	109.395	0
1	2	1050	1401	1453	2	1	1	1050	1401	0							1	2	696	561	1137	2	1	1	45.24	36.465	0							2	2	60	1932	992	2	1	1	3.9	125.58	0
1	2	963	1494	1549	2	1	1	963	1494	0							1	2	645	588	941	2	1	1	41.925	38.22	0							2	2	168	1917	1018	2	1	1	10.92	124.605	0
1	2	786	1380	1429	2	1	1	786	1380	0							1	2	645	528	948	2	1	1	41.925	34.32	0							2	2	294	1920	1017	2	1	1	19.11	124.8	0
1	2	1011	1650	1453	2	1	1	1011	1650	0							1	2	660	423	918	2	1	1	42.9	27.495	0							2	2	366	1971	1014	2	1	1	23.79	128.115	0
1	2	1458	1692	1383	2	1	1	1458	1692	0							1	2	558	357	861	2	1	1	36.27	23.205	0							2	2	444	1794	1156	2	1	1	28.86	116.61	0
1	2	1998	1731	1410	2	1	1	1998	1731	0							1	2	738	396	880	2	1	1	47.97	25.74	0							2	2	525	1953	1070	2	1	1	34.125	126.945	0
1	2	1716	1494	1475	2	1	1	1716	1494	0							1	2	543	267	1029	2	1	1	35.295	17.355	0							2	2	612	1836	1028	2	1	1	39.78	119.34	0
1	2	1074	1086	1438	2	1	1	1074	1086	0							1	2	621	258	892	2	1	1	40.365	16.77	0							2	2	705	1944	1076	2	1	1	45.825	126.36	0
1	2	1236	1797	1454	2	1	1	1236	1797	0							1	2	594	144	959	2	1	1	38.61	9.36	0							2	2	798	1962	1013	2	1	1	51.87	127.53	0
1	2	1725	1833	1368	2	1	1	1725	1833	0							1	2	840	213	951	2	1	1	54.6	13.845	0							2	2	771	1800	1082	2	1	1	50.115	117	0
1	2	1761	1920	1384	2	1	1	1761	1920	0							1	2	753	210	935	2	1	1	48.945	13.65	0							2	2	708	1752	1040	2	1	1	46.02	113.88	0
1	2	2031	2010	1474	2	1	1	2031	2010	0							1	2	861	81	1074	2	1	1	55.965	5.265	0							2	2	702	1827	1038	2	1	1	45.63	118.755	0
1	2	168	24	1465	2	1	1	168	24	0							1	2	969	45	988	2	1	1	62.985	2.925	0							2	2	507	1536	1021	2	1	1	32.955	99.84	0
1	2	618	339	1390	2	1	1	618	339	0							1	2	957	198	929	2	1	1	62.205	12.87	0							2	2	564	1467	1014	2	1	1	36.66	95.355	0
1	2	630	1266	1541	2	1	1	630	1266	0							1	2	1134	234	1006	2	1	1	73.71	15.21	0							2	2	639	1413	1041	2	1	1	41.535	91.845	0
1	2	654	1188	1393	2	1	1	654	1188	0							1	2	1107	186	962	2	1	1	71.955	12.09	0							2	2	807	1455	1029	2	1	1	52.455	94.575	0
1	2	732	540	1510	2	1	1	732	540	0							1	2	876	378	1038	2	1	1	56.94	24.57	0							2	2	705	1284	1080	2	1	1	45.825	83.46	0
1	2	603	729	1581	2	1	1	603	729	0							1	2	1035	483	986	2	1	1	67.275	31.395	0							2	2	660	1200	1061	2	1	1	42.9	78	0
1	2	537	648	1392	2	1	1	537	648	0							1	2	999	666	1143	2	1	1	64.935	43.29	0							2	2	570	1173	1019	2	1	1	37.05	76.245	0
1	2	312	735	1402	2	1	1	312	735	0							1	2	1017	837	1058	2	1	1	66.105	54.405	0							2	2	606	1110	966	2	1	1	39.39	72.15	0
1	2	153	696	1481	2	1	1	153	696	0							1	2	1062	1074	841	2	1	1	69.03	69.81	0							2	2	435	1128	1042	2	1	1	28.275	73.32	0
1	2	1383	189	1370	2	1	1	1383	189	0							1	2	1029	936	898	2	1	1	66.885	60.84	0							2	2	510	1098	1112	2	1	1	33.15	71.37	0
1	2	1821	720	1468	2	1	1	1821	720	0							1	2	945	1191	992	2	1	1	61.425	77.415	0							2	2	432	909	1119	2	1	1	28.08	59.085	0
1	2	1956	954	1401	2	1	1	1956	954	0							1	2	1014	1200	923	2	1	1	65.91	78	0							2	2	528	909	1127	2	1	1	34.32	59.085	0
1	2	1011	687	1605	2	1	1	1011	687	0							1	2	1101	1173	953	2	1	1	71.565	76.245	0							2	2	711	1023	1134	2	1	1	46.215	66.495	0
1	2	990	726	1607	2	1	1	990	726	0							1	2	1026	1350	883	2	1	1	66.69	87.75	0							2	2	663	879	1140	2	1	1	43.095	57.135	0
1	2	1176	549	1468	2	1	1	1176	549	0							1	2	1002	1431	904	2	1	1	65.13	93.015	0							2	2	699	813	1043	2	1	1	45.435	52.845	0
1	2	1329	567	1460	2	1	1	1329	567	0							1	2	885	1497	928	2	1	1	57.525	97.305	0							2	2	378	834	1004	2	1	1	24.57	54.21	0
1	2	978	1107	1559	2	1	1	978	1107	0							1	2	888	1548	957	2	1	1	57.72	100.62	0							2	2	399	657	1074	2	1	1	25.935	42.705	0
1	2	1029	1191	1677	2	1	1	1029	1191	0							1	2	996	1629	837	2	1	1	64.74	105.885	0							2	2	537	642	1065	2	1	1	34.905	41.73	0
1	2	1386	1140	1470	2	1	1	1386	1140	0							1	2	1017	1800	960	2	1	1	66.105	117	0							2	2	492	657	1020	2	1	1	31.98	42.705	0
1	2	1512	1242	1517	2	1	1	1512	1242	0							1	2	948	1851	952	2	1	1	61.62	120.315	0							2	2	600	588	1036	2	1	1	39	38.22	0
1	2	1872	1422	1399	2	1	1	1872	1422	0							1	2	999	1923	1014	2	1	1	64.935	124.995	0							2	2	657	318	1108	2	1	1	42.705	20.67	0
1	2	1890	1764	1487	2	1	1	1890	1764	0							1	2	1071	1866	903	2	1	1	69.615	121.29	0							2	2	558	183	1027	2	1	1	36.27	11.895	0
1	2	1767	1608	1426	2	1	1	1767	1608	0							1	2	1128	2001	800	2	1	1	73.32	130.065	0							2	2	534	90	1059	2	1	1	34.71	5.85	0
1	2	1638	1689	1621	2	1	1	1638	1689	0							1	2	1068	1995	877	2	1	1	69.42	129.675	0							2	2	585	54	926	2	1	1	38.025	3.51	0
1	2	1179	1281	1784	2	1	1	1179	1281	0							1	2	1173	1839	926	2	1	1	76.245	119.535	0							2	2	678	54	1116	2	1	1	44.07	3.51	0
1	2	1122	1317	1567	2	1	1	1122	1317	0							1	2	1308	1908	875	2	1	1	85.02	124.02	0							2	2	723	111	1047	2	1	1	46.995	7.215	0
1	2	1077	1635	1391	2	1	1	1077	1635	0							1	2	1377	1947	890	2	1	1	89.505	126.555	0							2	2	804	39	1001	2	1	1	52.26	2.535	0
1	2	651	1668	1424	2	1	1	651	1668	0							1	2	1365	1842	866	2	1	1	88.725	119.73	0							2	2	999	405	1059	2	1	1	64.935	26.325	0
1	2	408	1533	1457	2	1	1	408	1533	0							1	2	1470	1791	885	2	1	1	95.55	116.415	0							2	2	744	573	1064	2	1	1	48.36	37.245	0
1	2	459	1506	1505	2	1	1	459	1506	0							1	2	1305	1707	927	2	1	1	84.825	110.955	0							2	2	837	600	954	2	1	1	54.405	39	0
1	2	465	1530	2192	2	1	1	465	1530	0							1	2	1461	1995	915	2	1	1	94.965	129.675	0							2	2	918	642	1079	2	1	1	59.67	41.73	0
1	2	486	1518	1396	2	1	1	486	1518	0							1	2	1677	2004	901	2	1	1	109.005	130.26	0							2	2	915	696	1050	2	1	1	59.475	45.24	0
1	2	483	1521	1402	2	1	1	483	1521	0							1	2	1635	1881	918	2	1	1	106.275	122.265	0							2	2	957	708	1077	2	1	1	62.205	46.02	0
1	2	234	1557	1477	2	1	1	234	1557	0							1	2	1932	1953	933	2	1	1	125.58	126.945	0							2	2	852	729	1057	2	1	1	55.38	47.385	0
1	2	234	1491	1389	2	1	1	234	1491	0							1	2	1977	1908	933	2	1	1	128.505	124.02	0							2	2	783	762	1135	2	1	1	50.895	49.53	0
1	2	831	1053	1606	2	1	1	831	1053	0							1	2	1851	1809	952	2	1	1	120.315	117.585	0							2	2	1023	765	1082	2	1	1	66.495	49.725	0
1	2	765	999	1553	2	1	1	765	999	0							1	2	1644	1803	964	2	1	1	106.86	117.195	0							2	2	1050	813	998	2	1	1	68.25	52.845	0
1	2	744	924	1432	2	1	1	744	924	0							1	2	1698	1752	912	2	1	1	110.37	113.88	0							2	2	993	882	1035	2	1	1	64.545	57.33	0
1	2	735	1077	1741	2	1	1	735	1077	0							1	2	1455	1428	986	2	1	1	94.575	92.82	0							2	2	960	990	1034	2	1	1	62.4	64.35	0
1	2	1062	1833	1570	2	1	1	1062	1833	0							1	2	1242	1341	873	2	1	1	80.73	87.165	0							2	2	915	1002	1069	2	1	1	59.475	65.13	0
1	2	1101	1878	1439	2	1	1	1101	1878	0							1	2	1446	822	1059	2	1	1	93.99	53.43	0							2	2	1005	1032	1120	2	1	1	65.325	67.08	0
1	2	1329	2022	1496	2	1	1	1329	2022	0							1	2	1494	777	957	2	1	1	97.11	50.505	0							2	2	1116	975	1141	2	1	1	72.54	63.375	0
1	2	1413	1797	1413	2	1	1	1413	1797	0							1	2	1314	507	1256	2	1	1	85.41	32.955	0							2	2	903	1128	1081	2	1	1	58.695	73.32	0
1	2	600	1716	1368	2	1	1	600	1716	0							1	2	1911	759	970	2	1	1	124.215	49.335	0							2	2	837	1152	1159	2	1	1	54.405	74.88	0
1	2	894	1779	1460	2	1	1	894	1779	0							1	2	1989	999	984	2	1	1	129.285	64.935	0							2	2	825	1236	1079	2	1	1	53.625	80.34	0
1	2	180	1596	1445	2	1	1	180	1596	0							1	2	1908	1050	924	2	1	1	124.02	68.25	0							2	2	891	1203	1065	2	1	1	57.915	78.195	0
1	2	855	1296	1532	2	1	1	855	1296	0							1	2	1533	1074	1075	2	1	1	99.645	69.81	0							2	2	855	1314	1110	2	1	1	55.575	85.41	0
1	2	957	1896	1611	2	1	1	957	1896	0							1	2	1596	1185	973	2	1	1	103.74	77.025	0							2	2	948	1329	1072	2	1	1	61.62	86.385	0
2	2	54	39	1497	2	1	1	54	39	0							1	2	1761	1263	902	2	1	1	114.465	82.095	0							2	2	981	1440	997	2	1	1	63.765	93.6	0
2	2	96	126	1460	2	1	1	96	126	0							1	2	1638	435	969	2	1	1	106.47	28.275	0							2	2	1107	1347	990	2	1	1	71.955	87.555	0
2	2	165	141	1397	2	1	1	165	141	0							1	2	1722	423	904	2	1	1	111.93	27.495	0							2	2	1023	1194	1015	2	1	1	66.495	77.61	0
2	2	111	213	1429	2	1	1	111	213	0							1	2	1509	531	882	2	1	1	98.085	34.515	0							2	2	1083	1146	1141	2	1	1	70.395	74.49	0
2	2	171	234	1467	2	1	1	171	234	0							1	2	1947	603	906	2	1	1	126.555	39.195	0							2	2	1092	1221	1148	2	1	1	70.98	79.365	0
2	2	267	138	1780	2	1	1	267	138	0							1	2	1860	426	902	2	1	1	120.9	27.69	0							2	2	993	1608	1047	2	1	1	64.545	104.52	0
2	2	261	45	1546	2	1	1	261	45	0							1	2	2016	387	903	2	1	1	131.04	25.155	0							2	2	846	1710	1057	2	1	1	54.99	111.15	0
2	2	315	84	1485	2	1	1	315	84	0							1	2	1545	1521	875	2	1	1	100.425	98.865	0							2	2	984	1704	975	2	1	1	63.96	110.76	0
2	2	375	75	1332	2	1	1	375	75	0							1	2	1836	1923	823	2	1	1	119.34	124.995	0							2	2	987	1809	1055	2	1	1	64.155	117.585	0
2	2	345	165	1438	2	1	1	345	165	0							2	2	99	111	862	2	1	1	6.435	7.215	0							2	2	903	1875	1020	2	1	1	58.695	121.875	0
2	2	411	168	1414	2	1	1	411	168	0							2	2	165	93	935	2	1	1	10.725	6.045	0							2	2	903	1968	996	2	1	1	58.695	127.92	0
2	2	474	192	1447	2	1	1	474	192	0							2	2	294	45	900	2	1	1	19.11	2.925	0							2	2	1089	1890	961	2	1	1	70.785	122.85	0
2	2	414	240	1470	2	1	1	414	240	0							2	2	291	144	967	2	1	1	18.915	9.36	0							2	2	1194	1878	967	2	1	1	77.61	122.07	0
2	2	363	207	1699	2	1	1	363	207	0							2	2	186	285	952	2	1	1	12.09	18.525	0							2	2	1164	1809	1029	2	1	1	75.66	117.585	0
2	2	306	306	1552	2	1	1	306	306	0							2	2	366	183	904	2	1	1	23.79	11.895	0							2	2	1215	1761	1164	2	1	1	78.975	114.465	0
2	2	234	306	1456	2	1	1	234	306	0							2	2	378	252	1051	2	1	1	24.57	16.38	0							2	2	1335	2001	1014	2	1	1	86.775	130.065	0
2	2	495	321	1435	2	1	1	495	321	0							2	2	318	357	1166	2	1	1	20.67	23.205	0							2	2	1488	1959	909	2	1	1	96.72	127.335	0
2	2	531	276	1734	2	1	1	531	276	0							2	2	321	426	1023	2	1	1	20.865	27.69	0							2	2	1455	1911	1100	2	1	1	94.575	124.215	0
2	2	555	159	1392	2	1	1	555	159	0							2	2	222	573	958	2	1	1	14.43	37.245	0							2	2	1419	1851	1087	2	1	1	92.235	120.315	0
2	2	603	258	1567	2	1	1	603	258	0							2	2	138	537	948	2	1	1	8.97	34.905	0							2	2	1356	1782	1025	2	1	1	88.14	115.83	0
2	2	681	183	1359	2	1	1	681	183	0							2	2	291	606	1014	2	1	1	18.915	39.39	0							2	2	1341	1731	1094	2	1	1	87.165	112.515	0
2	2	723	237	1522	2	1	1	723	237	0							2	2	342	561	927	2	1	1	22.23	36.465	0							2	2	1437	1728	1023	2	1	1	93.405	112.32	0
2	2	774	180	1564	2	1	1	774	180	0							2	2	354	693	863	2	1	1	23.01	45.045	0							2	2	1506	1725	1057	2	1	1	97.89	112.125	0
2	2	834	216	1565	2	1	1	834	216	0							2	2	405	702	938	2	1	1	26.325	45.63	0							2	2	1590	1878	1052	2	1	1	103.35	122.07	0
2	2	837	132	1438	2	1	1	837	132	0							2	2	276	705	909	2	1	1	17.94	45.825	0							2	2	1716	1986	1108	2	1	1	111.54	129.09	0
2	2	918	117	1420	2	1	1	918	117	0							2	2	153	834	960	2	1	1	9.945	54.21	0							2	2	1743	1908	1120	2	1	1	113.295	124.02	0
2	2	951	66	1567	2	1	1	951	66	0							2	2	75	876	895	2	1	1	4.875	56.94	0							2	2	1848	1956	1010	2	1	1	120.12	127.14	0
2	2	1083	78	1613	2	1	1	1083	78	0							2	2	108	1008	904	2	1	1	7.02	65.52	0							2	2	1947	1779	1072	2	1	1	126.555	115.635	0
2	2	1074	141	1595	2	1	1	1074	141	0							2	2	402	795	918	2	1	1	26.13	51.675	0							2	2	1803	1782	1058	2	1	1	117.195	115.83	0
2	2	1014	183	1457	2	1	1	1014	183	0							2	2	408	903	877	2	1	1	26.52	58.695	0							2	2	1722	1818	1143	2	1	1	111.93	118.17	0
2	2	933	195	1471	2	1	1	933	195	0							2	2	411	963	874	2	1	1	26.715	62.595	0							2	2	1644	1800	1077	2	1	1	106.86	117	0
2	2	1002	276	1471	2	1	1	1002	276	0							2	2	237	1056	975	2	1	1	15.405	68.64	0							2	2	1869	1647	1049	2	1	1	121.485	107.055	0
2	2	918	270	1440	2	1	1	918	270	0							2	2	159	1101	1203	2	1	1	10.335	71.565	0							2	2	1788	1683	1013	2	1	1	116.22	109.395	0
2	2	942	348	1414	2	1	1	942	348	0							2	2	252	1134	1069	2	1	1	16.38	73.71	0							2	2	1668	1629	1021	2	1	1	108.42	105.885	0
2	2	975	402	1395	2	1	1	975	402	0							2	2	321	1167	869	2	1	1	20.865	75.855	0							2	2	1908	1551	1185	2	1	1	124.02	100.815	0
2	2	933	447	1436	2	1	1	933	447	0							2	2	312	1278	1133	2	1	1	20.28	83.07	0							2	2	2004	1521	1011	2	1	1	130.26	98.865	0
2	2	858	414	1403	2	1	1	858	414	0							2	2	294	1230	955	2	1	1	19.11	79.95	0							2	2	1353	1599	1027	2	1	1	87.945	103.935	0
2	2	789	447	1479	2	1	1	789	447	0							2	2	249	1269	951	2	1	1	16.185	82.485	0							2	2	1284	1509	1055	2	1	1	83.46	98.085	0
2	2	720	438	1447	2	1	1	720	438	0							2	2	267	1323	964	2	1	1	17.355	85.995	0							2	2	1335	1437	1105	2	1	1	86.775	93.405	0
2	2	663	438	1419	2	1	1	663	438	0							2	2	165	1308	979	2	1	1	10.725	85.02	0							2	2	1452	1437	1078	2	1	1	94.38	93.405	0
2	2	690	336	1762	2	1	1	690	336	0							2	2	198	1356	961	2	1	1	12.87	88.14	0							2	2	1473	1521	1054	2	1	1	95.745	98.865	0
2	2	603	861	1413	2	1	1	603	861	0							2	2	84	1260	888	2	1	1	5.46	81.9	0							2	2	1524	1434	1047	2	1	1	99.06	93.21	0
2	2	435	651	1759	2	1	1	435	651	0							2	2	81	1410	884	2	1	1	5.265	91.65	0							2	2	1587	1308	1034	2	1	1	103.155	85.02	0
2	2	381	690	1488	2	1	1	381	690	0							2	2	39	1563	981	2	1	1	2.535	101.595	0							2	2	1833	1338	1010	2	1	1	119.145	86.97	0
2	2	156	546	1518	2	1	1	156	546	0							2	2	150	1515	930	2	1	1	9.75	98.475	0							2	2	1737	1215	1020	2	1	1	112.905	78.975	0
2	2	105	444	1406	2	1	1	105	444	0							2	2	96	1815	974	2	1	1	6.24	117.975	0							2	2	1545	1224	1103	2	1	1	100.425	79.56	0
2	2	237	462	1491	2	1	1	237	462	0							2	2	42	1767	998	2	1	1	2.73	114.855	0							2	2	1488	1275	1037	2	1	1	96.72	82.875	0
2	2	351	522	1439	2	1	1	351	522	0							2	2	138	1887	937	2	1	1	8.97	122.655	0							2	2	1398	1251	1068	2	1	1	90.87	81.315	0
2	2	495	486	1502	2	1	1	495	486	0							2	2	153	1956	987	2	1	1	9.945	127.14	0							2	2	1449	1359	1054	2	1	1	94.185	88.335	0
2	2	1248	150	1487	2	1	1	1248	150	0							2	2	66	1953	887	2	1	1	4.29	126.945	0							2	2	1380	1365	1098	2	1	1	89.7	88.725	0
2	2	1494	219	1437	2	1	1	1494	219	0							2	2	411	1974	1185	2	1	1	26.715	128.31	0							2	2	1218	1251	1010	2	1	1	79.17	81.315	0
2	2	1440	123	1437	2	1	1	1440	123	0							2	2	450	1905	904	2	1	1	29.25	123.825	0							2	2	1269	1155	1004	2	1	1	82.485	75.075	0
2	2	1755	135	1754	2	1	1	1755	135	0							2	2	504	1797	916	2	1	1	32.76	116.805	0							2	2	1176	1104	1012	2	1	1	76.44	71.76	0
2	2	1746	69	1491	2	1	1	1746	69	0							2	2	561	1743	978	2	1	1	36.465	113.295	0							2	2	1722	1101	1038	2	1	1	111.93	71.565	0
2	2	1818	120	1585	2	1	1	1818	120	0							2	2	462	1518	1062	2	1	1	30.03	98.67	0							2	2	1872	1095	1097	2	1	1	121.68	71.175	0
2	2	1839	195	1369	2	1	1	1839	195	0							2	2	564	1494	915	2	1	1	36.66	97.11	0							2	2	1794	1101	1067	2	1	1	116.61	71.565	0
2	2	1914	222	1484	2	1	1	1914	222	0							2	2	570	1386	941	2	1	1	37.05	90.09	0							2	2	1956	1191	1164	2	1	1	127.14	77.415	0
2	2	1836	366	1753	2	1	1	1836	366	0							2	2	594	1329	1237	2	1	1	38.61	86.385	0							2	2	1926	1029	1119	2	1	1	125.19	66.885	0
2	2	1782	270	1388	2	1	1	1782	270	0							2	2	726	1536	1079	2	1	1	47.19	99.84	0							2	2	1863	993	1036	2	1	1	121.095	64.545	0
2	2	1770	372	1411	2	1	1	1770	372	0							2	2	582	1209	850	2	1	1	37.83	78.585	0							2	2	1788	1002	998	2	1	1	116.22	65.13	0
2	2	1707	591	1469	2	1	1	1707	591	0							2	2	645	1149	919	2	1	1	41.925	74.685	0							2	2	1698	1014	1128	2	1	1	110.37	65.91	0
2	2	1599	579	1495	2	1	1	1599	579	0							2	2	573	1140	949	2	1	1	37.245	74.1	0							2	2	1512	999	1104	2	1	1	98.28	64.935	0
2	2	1710	654	1459	2	1	1	1710	654	0							2	2	561	1008	896	2	1	1	36.465	65.52	0							2	2	1470	1095	1110	2	1	1	95.55	71.175	0
2	2	1968	729	1461	2	1	1	1968	729	0							2	2	633	1020	854	2	1	1	41.145	66.3	0							2	2	1290	993	1015	2	1	1	83.85	64.545	0
2	2	1878	864	1422	2	1	1	1878	864	0							2	2	729	1023	961	2	1	1	47.385	66.495	0							2	2	1185	945	1029	2	1	1	77.025	61.425	0
2	2	1782	846	1471	2	1	1	1782	846	0							2	2	615	918	894	2	1	1	39.975	59.67	0							2	2	1260	930	1067	2	1	1	81.9	60.45	0
2	2	1710	915	1486	2	1	1	1710	915	0							2	2	696	840	898	2	1	1	45.24	54.6	0							2	2	1308	909	1051	2	1	1	85.02	59.085	0
2	2	1773	942	1348	2	1	1	1773	942	0							2	2	579	825	942	2	1	1	37.635	53.625	0							2	2	1530	903	1076	2	1	1	99.45	58.695	0
2	2	1869	975	1544	2	1	1	1869	975	0							2	2	609	738	1087	2	1	1	39.585	47.97	0							2	2	1659	888	1097	2	1	1	107.835	57.72	0
2	2	2019	996	1446	2	1	1	2019	996	0							2	2	666	687	959	2	1	1	43.29	44.655	0							2	2	1743	903	1096	2	1	1	113.295	58.695	0
2	2	1989	1068	1500	2	1	1	1989	1068	0							2	2	759	756	887	2	1	1	49.335	49.14	0							2	2	1944	906	1219	2	1	1	126.36	58.89	0
2	2	1956	1158	1588	2	1	1	1956	1158	0							2	2	720	702	915	2	1	1	46.8	45.63	0							2	2	1773	684	1036	2	1	1	115.245	44.46	0
2	2	1881	1161	1327	2	1	1	1881	1161	0							2	2	528	618	956	2	1	1	34.32	40.17	0							2	2	1584	690	1101	2	1	1	102.96	44.85	0
2	2	1776	1158	1383	2	1	1	1776	1158	0							2	2	564	534	948	2	1	1	36.66	34.71	0							2	2	1350	783	1095	2	1	1	87.75	50.895	0
2	2	1770	1089	1640	2	1	1	1770	1089	0							2	2	528	477	988	2	1	1	34.32	31.005	0							2	2	1257	816	1108	2	1	1	81.705	53.04	0
2	2	1719	1038	1641	2	1	1	1719	1038	0							2	2	525	141	921	2	1	1	34.125	9.165	0							2	2	1176	750	1132	2	1	1	76.44	48.75	0
2	2	1548	1044	1341	2	1	1	1548	1044	0							2	2	459	180	992	2	1	1	29.835	11.7	0							2	2	1173	663	1187	2	1	1	76.245	43.095	0
2	2	1416	1068	1496	2	1	1	1416	1068	0							2	2	681	147	885	2	1	1	44.265	9.555	0							2	2	1119	639	1069	2	1	1	72.735	41.535	0
2	2	1314	1056	1506	2	1	1	1314	1056	0							2	2	744	153	1011	2	1	1	48.36	9.945	0							2	2	1038	612	1064	2	1	1	67.47	39.78	0
2	2	1215	1062	1674	2	1	1	1215	1062	0							2	2	765	78	1096	2	1	1	49.725	5.07	0							2	2	1182	552	1122	2	1	1	76.83	35.88	0
2	2	1167	1110	1468	2	1	1	1167	1110	0							2	2	795	279	890	2	1	1	51.675	18.135	0							2	2	1329	630	1113	2	1	1	86.385	40.95	0
2	2	1110	978	1464	2	1	1	1110	978	0							2	2	672	327	928	2	1	1	43.68	21.255	0							2	2	1407	642	1160	2	1	1	91.455	41.73	0
2	2	1179	930	1508	2	1	1	1179	930	0							2	2	888	144	919	2	1	1	57.72	9.36	0							2	2	1479	696	1118	2	1	1	96.135	45.24	0
2	2	1140	819	1529	2	1	1	1140	819	0							2	2	1032	210	1165	2	1	1	67.08	13.65	0							2	2	1491	468	1014	2	1	1	96.915	30.42	0
2	2	1080	810	1523	2	1	1	1080	810	0							2	2	1074	117	919	2	1	1	69.81	7.605	0							2	2	1698	486	1151	2	1	1	110.37	31.59	0
2	2	1110	741	1406	2	1	1	1110	741	0							2	2	1122	117	891	2	1	1	72.93	7.605	0							2	2	1767	462	1082	2	1	1	114.855	30.03	0
2	2	1167	642	1442	2	1	1	1167	642	0							2	2	1167	171	1037	2	1	1	75.855	11.115	0							2	2	1629	468	1068	2	1	1	105.885	30.42	0
2	2	1260	612	1646	2	1	1	1260	612	0							2	2	996	360	932	2	1	1	64.74	23.4	0							2	2	1572	438	1068	2	1	1	102.18	28.47	0
2	2	1254	519	1529	2	1	1	1254	519	0							2	2	807	441	864	2	1	1	52.455	28.665	0							2	2	1566	330	1201	2	1	1	101.79	21.45	0
2	2	1122	516	1470	2	1	1	1122	516	0							2	2	1074	591	884	2	1	1	69.81	38.415	0							2	2	1500	306	1066	2	1	1	97.5	19.89	0
2	2	1089	582	1573	2	1	1	1089	582	0							2	2	1032	738	955	2	1	1	67.08	47.97	0							2	2	1434	255	1061	2	1	1	93.21	16.575	0
2	2	1026	597	1462	2	1	1	1026	597	0							2	2	915	729	967	2	1	1	59.475	47.385	0							2	2	1824	273	1134	2	1	1	118.56	17.745	0
2	2	987	600	1477	2	1	1	987	600	0							2	2	1047	1005	1043	2	1	1	68.055	65.325	0							2	2	1674	210	1102	2	1	1	108.81	13.65	0
2	2	1428	558	1647	2	1	1	1428	558	0							2	2	891	1068	866	2	1	1	57.915	69.42	0							2	2	1608	240	1097	2	1	1	104.52	15.6	0
2	2	1398	462	1406	2	1	1	1398	462	0							2	2	978	1095	946	2	1	1	63.57	71.175	0							2	2	1782	129	1101	2	1	1	115.83	8.385	0
2	2	1377	366	1561	2	1	1	1377	366	0							2	2	1203	954	875	2	1	1	78.195	62.01	0							2	2	1908	330	1042	2	1	1	124.02	21.45	0
2	2	1791	1326	1548	2	1	1	1791	1326	0							2	2	1140	858	923	2	1	1	74.1	55.77	0							2	2	1947	405	1033	2	1	1	126.555	26.325	0
2	2	1788	1419	1426	2	1	1	1788	1419	0							2	2	1140	669	1161	2	1	1	74.1	43.485	0							2	2	1221	114	1077	2	1	1	79.365	7.41	0
2	2	1995	1377	1592	2	1	1	1995	1377	0							2	2	1179	753	913	2	1	1	76.635	48.945	0							2	2	1110	57	1105	2	1	1	72.15	3.705	0
2	2	2007	1458	1539	2	1	1	2007	1458	0							2	2	1134	999	1155	2	1	1	73.71	64.935	0							2	2	1068	174	1076	2	1	1	69.42	11.31	0
2	2	1899	1497	1309	2	1	1	1899	1497	0							2	2	1173	1146	978	2	1	1	76.245	74.49	0							2	2	1122	186	1015	2	1	1	72.93	12.09	0
2	2	1989	1542	1457	2	1	1	1989	1542	0							2	2	1236	1125	876	2	1	1	80.34	73.125	0
2	2	1926	1545	1422	2	1	1	1926	1545	0							2	2	1173	1206	922	2	1	1	76.245	78.39	0
2	2	1914	1620	1394	2	1	1	1914	1620	0							2	2	1167	1302	1043	2	1	1	75.855	84.63	0
2	2	1956	1641	1477	2	1	1	1956	1641	0							2	2	1173	1392	1077	2	1	1	76.245	90.48	0
2	2	1911	1686	1532	2	1	1	1911	1686	0							2	2	1107	1449	951	2	1	1	71.955	94.185	0
2	2	1845	1701	1525	2	1	1	1845	1701	0							2	2	963	1485	937	2	1	1	62.595	96.525	0
2	2	1539	1635	1481	2	1	1	1539	1635	0							2	2	963	1533	902	2	1	1	62.595	99.645	0
2	2	1476	1575	1428	2	1	1	1476	1575	0							2	2	1059	1527	890	2	1	1	68.835	99.255	0
2	2	1551	1485	1368	2	1	1	1551	1485	0							2	2	939	1668	980	2	1	1	61.035	108.42	0
2	2	1458	1452	1470	2	1	1	1458	1452	0							2	2	852	1650	974	2	1	1	55.38	107.25	0
2	2	1461	1527	1423	2	1	1	1461	1527	0							2	2	1017	1698	907	2	1	1	66.105	110.37	0
2	2	1380	1503	1755	2	1	1	1380	1503	0							2	2	1116	1665	872	2	1	1	72.54	108.225	0
2	2	1380	1584	1497	2	1	1	1380	1584	0							2	2	1194	1689	983	2	1	1	77.61	109.785	0
2	2	1428	1374	1546	2	1	1	1428	1374	0							2	2	1182	1599	903	2	1	1	76.83	103.935	0
2	2	1488	1320	1491	2	1	1	1488	1320	0							2	2	1191	1533	948	2	1	1	77.415	99.645	0
2	2	1527	1398	1596	2	1	1	1527	1398	0							2	2	1524	1989	971	2	1	1	99.06	129.285	0
2	2	1299	1287	1499	2	1	1	1299	1287	0							2	2	1446	1932	904	2	1	1	93.99	125.58	0
2	2	1353	1230	1533	2	1	1	1353	1230	0							2	2	1503	1917	937	2	1	1	97.695	124.605	0
2	2	1266	1191	1492	2	1	1	1266	1191	0							2	2	1569	1914	922	2	1	1	101.985	124.41	0
2	2	282	1992	1602	2	1	1	282	1992	0							2	2	1392	1734	947	2	1	1	90.48	112.71	0
2	2	240	1845	1387	2	1	1	240	1845	0							2	2	1371	1611	930	2	1	1	89.115	104.715	0
2	2	291	1815	1531	2	1	1	291	1815	0							2	2	1371	1491	930	2	1	1	89.115	96.915	0
2	2	342	1827	1378	2	1	1	342	1827	0							2	2	1425	1554	927	2	1	1	92.625	101.01	0
2	2	276	1725	1399	2	1	1	276	1725	0							2	2	1479	1692	899	2	1	1	96.135	109.98	0
2	2	465	1656	1368	2	1	1	465	1656	0							2	2	1551	1749	862	2	1	1	100.815	113.685	0
2	2	486	1515	1392	2	1	1	486	1515	0							2	2	1587	2013	1370	2	1	1	103.155	130.845	0
2	2	888	1515	1646	2	1	1	888	1515	0							2	2	1794	1743	972	2	1	1	116.61	113.295	0
2	2	759	1488	1378	2	1	1	759	1488	0							2	2	1923	1776	902	2	1	1	124.995	115.44	0
2	2	843	1467	1397	2	1	1	843	1467	0							2	2	1986	1758	847	2	1	1	129.09	114.27	0
2	2	1440	717	1424	2	1	1	1440	717	0							2	2	1983	1668	898	2	1	1	128.895	108.42	0
2	2	1494	666	1464	2	1	1	1494	666	0							2	2	1887	1620	886	2	1	1	122.655	105.3	0
2	2	1443	888	1438	2	1	1	1443	888	0							2	2	1860	1689	1058	2	1	1	120.9	109.785	0
2	2	1494	1140	1472	2	1	1	1494	1140	0							2	2	1788	1665	1082	2	1	1	116.22	108.225	0
2	2	1437	1221	1555	2	1	1	1437	1221	0							2	2	1716	1650	873	2	1	1	111.54	107.25	0
2	2	1326	1383	1348	2	1	1	1326	1383	0							2	2	1653	1647	890	2	1	1	107.445	107.055	0
2	2	1215	1530	1375	2	1	1	1215	1530	0							2	2	1269	1449	995	2	1	1	82.485	94.185	0
2	2	1101	1563	1425	2	1	1	1101	1563	0							2	2	1311	1392	905	2	1	1	85.215	90.48	0
2	2	1206	1608	1485	2	1	1	1206	1608	0							2	2	1368	1335	942	2	1	1	88.92	86.775	0
2	2	1074	1755	1664	2	1	1	1074	1755	0							2	2	1527	1209	938	2	1	1	99.255	78.585	0
2	2	111	1017	1472	2	1	1	111	1017	0							2	2	1434	1092	884	2	1	1	93.21	70.98	0
2	2	66	1077	1433	2	1	1	66	1077	0							2	2	1317	1056	998	2	1	1	85.605	68.64	0
2	2	126	1146	1476	2	1	1	126	1146	0							2	2	1305	987	913	2	1	1	84.825	64.155	0
2	2	204	987	1393	2	1	1	204	987	0							2	2	1275	855	982	2	1	1	82.875	55.575	0
2	2	198	921	1462	2	1	1	198	921	0							2	2	1506	864	1007	2	1	1	97.89	56.16	0
2	2	330	852	1543	2	1	1	330	852	0							2	2	1251	612	913	2	1	1	81.315	39.78	0
2	2	279	798	1527	2	1	1	279	798	0							2	2	1443	594	962	2	1	1	93.795	38.61	0
2	2	48	912	1557	2	1	1	48	912	0							2	2	1383	588	941	2	1	1	89.895	38.22	0
2	2	852	531	1356	2	1	1	852	531	0							2	2	1176	507	962	2	1	1	76.44	32.955	0
2	2	759	1245	1486	2	1	1	759	1245	0							2	2	1086	393	922	2	1	1	70.59	25.545	0
2	2	549	1446	1463	2	1	1	549	1446	0							2	2	1296	315	996	2	1	1	84.24	20.475	0
																	2	2	1350	144	977	2	1	1	87.75	9.36	0
																	2	2	1230	96	977	2	1	1	79.95	6.24	0
																	2	2	1386	81	893	2	1	1	90.09	5.265	0
																	2	2	1440	48	1127	2	1	1	93.6	3.12	0
																	2	2	1344	444	956	2	1	1	87.36	28.86	0
																	2	2	1443	297	948	2	1	1	93.795	19.305	0
																	2	2	1392	246	1074	2	1	1	90.48	15.99	0
																	2	2	1455	219	1003	2	1	1	94.575	14.235	0
																	2	2	1437	135	883	2	1	1	93.405	8.775	0
																	2	2	1599	75	839	2	1	1	103.935	4.875	0
																	2	2	1569	153	945	2	1	1	101.985	9.945	0
																	2	2	1923	201	933	2	1	1	124.995	13.065	0
																	2	2	1605	687	933	2	1	1	104.325	44.655	0
																	2	2	1737	816	965	2	1	1	112.905	53.04	0
																	2	2	1830	765	1084	2	1	1	118.95	49.725	0
																	2	2	1803	684	910	2	1	1	117.195	44.46	0
																	2	2	1908	855	1049	2	1	1	124.02	55.575	0
																	2	2	1890	924	867	2	1	1	122.85	60.06	0
																	2	2	1866	1011	930	2	1	1	121.29	65.715	0
																	2	2	1800	1101	948	2	1	1	117	71.565	0

## Sheet: 4766
4766_0'_#.nd2																	4766_0'_#003.nd2																	4766_15'_#.nd2
Type	Slice	X	Y	Value	C-pos	Z-pos	T-pos	X(pixel)	Y(pixel)	Z(pixel)		Key	Number	Proportion			Type	Slice	X	Y	Value	C-pos	Z-pos	T-pos	X(pixel)	Y(pixel)	Z(pixel)		Key	Number	Proportion			Type	Slice	X	Y	Value	C-pos	Z-pos	T-pos	X(pixel)	Y(pixel)	Z(pixel)		Key	Number	Proportion
1	2	90	66	959	2	1	1	5.85	4.29	0		1=astrals	140	0.454545			1	2	63	264	766	2	1	1	4.095	17.16	0		1=astrals	122	0.458647			**analyzed image saved, but forgot to grab measurements												1=astrals	56	0.284264
1	2	39	174	957	2	1	1	2.535	11.31	0		2=no astrals	168	0.545455			1	2	195	162	940	2	1	1	12.675	10.53	0		2=no astrals	144	0.541353															2=no astrals	141	0.715736
1	2	144	267	930	2	1	1	9.36	17.355	0		Total	308				1	2	213	225	915	2	1	1	13.845	14.625	0		Total	266																Total	197
1	2	189	333	936	2	1	1	12.285	21.645	0							1	2	324	99	927	2	1	1	21.06	6.435	0
1	2	357	336	949	2	1	1	23.205	21.84	0							1	2	354	261	953	2	1	1	23.01	16.965	0
1	2	408	279	974	2	1	1	26.52	18.135	0							1	2	453	240	911	2	1	1	29.445	15.6	0
1	2	321	141	926	2	1	1	20.865	9.165	0							1	2	393	198	892	2	1	1	25.545	12.87	0
1	2	381	54	1034	2	1	1	24.765	3.51	0							1	2	486	105	962	2	1	1	31.59	6.825	0
1	2	507	66	905	2	1	1	32.955	4.29	0							1	2	300	363	916	2	1	1	19.5	23.595	0
1	2	123	414	966	2	1	1	7.995	26.91	0							1	2	246	438	821	2	1	1	15.99	28.47	0
1	2	183	417	938	2	1	1	11.895	27.105	0							1	2	111	381	897	2	1	1	7.215	24.765	0
1	2	228	465	1123	2	1	1	14.82	30.225	0							1	2	192	507	784	2	1	1	12.48	32.955	0
1	2	117	669	1070	2	1	1	7.605	43.485	0							1	2	174	477	783	2	1	1	11.31	31.005	0
1	2	165	708	1018	2	1	1	10.725	46.02	0							1	2	63	594	813	2	1	1	4.095	38.61	0
1	2	333	687	1080	2	1	1	21.645	44.655	0							1	2	261	636	849	2	1	1	16.965	41.34	0
1	2	111	846	1015	2	1	1	7.215	54.99	0							1	2	30	723	884	2	1	1	1.95	46.995	0
1	2	423	873	1034	2	1	1	27.495	56.745	0							1	2	402	405	937	2	1	1	26.13	26.325	0
1	2	432	963	1058	2	1	1	28.08	62.595	0							1	2	363	525	916	2	1	1	23.595	34.125	0
1	2	339	945	992	2	1	1	22.035	61.425	0							1	2	423	663	828	2	1	1	27.495	43.095	0
1	2	327	1041	1054	2	1	1	21.255	67.665	0							1	2	108	861	826	2	1	1	7.02	55.965	0
1	2	138	1062	1110	2	1	1	8.97	69.03	0							1	2	321	855	846	2	1	1	20.865	55.575	0
1	2	96	1137	1003	2	1	1	6.24	73.905	0							1	2	357	759	877	2	1	1	23.205	49.335	0
1	2	243	1161	1134	2	1	1	15.795	75.465	0							1	2	420	744	869	2	1	1	27.3	48.36	0
1	2	312	1272	1037	2	1	1	20.28	82.68	0							1	2	420	942	791	2	1	1	27.3	61.23	0
1	2	237	1278	982	2	1	1	15.405	83.07	0							1	2	360	972	928	2	1	1	23.4	63.18	0
1	2	153	1311	1025	2	1	1	9.945	85.215	0							1	2	282	987	748	2	1	1	18.33	64.155	0
1	2	90	1344	940	2	1	1	5.85	87.36	0							1	2	165	1002	850	2	1	1	10.725	65.13	0
1	2	171	1509	940	2	1	1	11.115	98.085	0							1	2	189	1092	830	2	1	1	12.285	70.98	0
1	2	234	1407	1049	2	1	1	15.21	91.455	0							1	2	210	1152	856	2	1	1	13.65	74.88	0
1	2	45	1503	1022	2	1	1	2.925	97.695	0							1	2	261	1098	966	2	1	1	16.965	71.37	0
1	2	303	1482	1049	2	1	1	19.695	96.33	0							1	2	405	1116	928	2	1	1	26.325	72.54	0
1	2	435	1545	984	2	1	1	28.275	100.425	0							1	2	45	1221	784	2	1	1	2.925	79.365	0
1	2	225	1734	942	2	1	1	14.625	112.71	0							1	2	108	1251	850	2	1	1	7.02	81.315	0
1	2	135	1680	952	2	1	1	8.775	109.2	0							1	2	276	1212	891	2	1	1	17.94	78.78	0
1	2	96	1839	914	2	1	1	6.24	119.535	0							1	2	192	1197	958	2	1	1	12.48	77.805	0
1	2	333	1824	983	2	1	1	21.645	118.56	0							1	2	195	1320	857	2	1	1	12.675	85.8	0
1	2	192	1917	992	2	1	1	12.48	124.605	0							1	2	129	1362	944	2	1	1	8.385	88.53	0
1	2	87	1947	970	2	1	1	5.655	126.555	0							1	2	51	1308	807	2	1	1	3.315	85.02	0
1	2	441	1857	1105	2	1	1	28.665	120.705	0							1	2	51	1416	870	2	1	1	3.315	92.04	0
1	2	492	1812	1038	2	1	1	31.98	117.78	0							1	2	414	1329	817	2	1	1	26.91	86.385	0
1	2	552	1728	1098	2	1	1	35.88	112.32	0							1	2	69	1476	818	2	1	1	4.485	95.94	0
1	2	633	1887	970	2	1	1	41.145	122.655	0							1	2	156	1473	951	2	1	1	10.14	95.745	0
1	2	777	1827	901	2	1	1	50.505	118.755	0							1	2	93	1659	871	2	1	1	6.045	107.835	0
1	2	711	1728	962	2	1	1	46.215	112.32	0							1	2	306	1659	771	2	1	1	19.89	107.835	0
1	2	663	1668	1003	2	1	1	43.095	108.42	0							1	2	204	1698	962	2	1	1	13.26	110.37	0
1	2	906	1707	978	2	1	1	58.89	110.955	0							1	2	96	1923	864	2	1	1	6.24	124.995	0
1	2	600	1428	1150	2	1	1	39	92.82	0							1	2	408	1758	807	2	1	1	26.52	114.27	0
1	2	966	1440	944	2	1	1	62.79	93.6	0							1	2	315	1986	787	2	1	1	20.475	129.09	0
1	2	903	1389	1028	2	1	1	58.695	90.285	0							1	2	42	1998	845	2	1	1	2.73	129.87	0
1	2	828	1371	1080	2	1	1	53.82	89.115	0							1	2	291	1857	778	2	1	1	18.915	120.705	0
1	2	684	1368	1077	2	1	1	44.46	88.92	0							1	2	144	1824	821	2	1	1	9.36	118.56	0
1	2	732	1281	1109	2	1	1	47.58	83.265	0							1	2	606	1734	817	2	1	1	39.39	112.71	0
1	2	606	1305	989	2	1	1	39.39	84.825	0							1	2	696	1713	869	2	1	1	45.24	111.345	0
1	2	663	1245	983	2	1	1	43.095	80.925	0							1	2	777	1701	804	2	1	1	50.505	110.565	0
1	2	777	1194	1027	2	1	1	50.505	77.61	0							1	2	792	1602	802	2	1	1	51.48	104.13	0
1	2	840	1146	954	2	1	1	54.6	74.49	0							1	2	831	1635	887	2	1	1	54.015	106.275	0
1	2	612	993	1017	2	1	1	39.78	64.545	0							1	2	753	1524	954	2	1	1	48.945	99.06	0
1	2	669	948	1012	2	1	1	43.485	61.62	0							1	2	642	1413	839	2	1	1	41.73	91.845	0
1	2	609	870	994	2	1	1	39.585	56.55	0							1	2	438	1407	836	2	1	1	28.47	91.455	0
1	2	642	840	1001	2	1	1	41.73	54.6	0							1	2	912	1410	825	2	1	1	59.28	91.65	0
1	2	489	768	979	2	1	1	31.785	49.92	0							1	2	960	1350	975	2	1	1	62.4	87.75	0
1	2	669	696	1021	2	1	1	43.485	45.24	0							1	2	612	1203	814	2	1	1	39.78	78.195	0
1	2	858	612	956	2	1	1	55.77	39.78	0							1	2	807	1212	883	2	1	1	52.455	78.78	0
1	2	747	699	1040	2	1	1	48.555	45.435	0							1	2	939	1080	838	2	1	1	61.035	70.2	0
1	2	648	552	978	2	1	1	42.12	35.88	0							1	2	594	945	871	2	1	1	38.61	61.425	0
1	2	765	387	969	2	1	1	49.725	25.155	0							1	2	804	837	944	2	1	1	52.26	54.405	0
1	2	699	354	1007	2	1	1	45.435	23.01	0							1	2	858	768	852	2	1	1	55.77	49.92	0
1	2	654	267	966	2	1	1	42.51	17.355	0							1	2	624	687	819	2	1	1	40.56	44.655	0
1	2	750	141	968	2	1	1	48.75	9.165	0							1	2	699	621	853	2	1	1	45.435	40.365	0
1	2	840	198	1033	2	1	1	54.6	12.87	0							1	2	588	609	830	2	1	1	38.22	39.585	0
1	2	831	132	1040	2	1	1	54.015	8.58	0							1	2	891	96	868	2	1	1	57.915	6.24	0
1	2	924	57	957	2	1	1	60.06	3.705	0							1	2	804	126	830	2	1	1	52.26	8.19	0
1	2	936	567	966	2	1	1	60.84	36.855	0							1	2	801	345	903	2	1	1	52.065	22.425	0
1	2	918	708	1080	2	1	1	59.67	46.02	0							1	2	966	504	877	2	1	1	62.79	32.76	0
1	2	1035	792	1120	2	1	1	67.275	51.48	0							1	2	1020	456	882	2	1	1	66.3	29.64	0
1	2	918	975	935	2	1	1	59.67	63.375	0							1	2	939	651	955	2	1	1	61.035	42.315	0
1	2	840	981	999	2	1	1	54.6	63.765	0							1	2	789	645	1040	2	1	1	51.285	41.925	0
1	2	882	1041	1026	2	1	1	57.33	67.665	0							1	2	1026	924	848	2	1	1	66.69	60.06	0
1	2	903	1308	1026	2	1	1	58.695	85.02	0							1	2	954	933	887	2	1	1	62.01	60.645	0
1	2	861	1206	992	2	1	1	55.965	78.39	0							1	2	1023	1047	870	2	1	1	66.495	68.055	0
1	2	1041	1248	1055	2	1	1	67.665	81.12	0							1	2	1017	1107	811	2	1	1	66.105	71.955	0
1	2	924	1227	966	2	1	1	60.06	79.755	0							1	2	1092	1119	854	2	1	1	70.98	72.735	0
1	2	1038	1569	1055	2	1	1	67.47	101.985	0							1	2	1113	1356	870	2	1	1	72.345	88.14	0
1	2	1062	1734	980	2	1	1	69.03	112.71	0							1	2	1146	1272	885	2	1	1	74.49	82.68	0
1	2	1224	1614	992	2	1	1	79.56	104.91	0							1	2	1137	1689	964	2	1	1	73.905	109.785	0
1	2	1239	1917	985	2	1	1	80.535	124.605	0							1	2	1278	1335	850	2	1	1	83.07	86.775	0
1	2	1305	1728	1006	2	1	1	84.825	112.32	0							1	2	1626	1815	958	2	1	1	105.69	117.975	0
1	2	1431	1881	947	2	1	1	93.015	122.265	0							1	2	1725	1926	854	2	1	1	112.125	125.19	0
1	2	1461	1953	940	2	1	1	94.965	126.945	0							1	2	1797	1929	858	2	1	1	116.805	125.385	0
1	2	1545	1974	971	2	1	1	100.425	128.31	0							1	2	1773	2007	940	2	1	1	115.245	130.455	0
1	2	1323	1452	956	2	1	1	85.995	94.38	0							1	2	1797	1830	877	2	1	1	116.805	118.95	0
1	2	1362	1386	1018	2	1	1	88.53	90.09	0							1	2	1959	1794	776	2	1	1	127.335	116.61	0
1	2	1311	1305	1026	2	1	1	85.215	84.825	0							1	2	1596	1662	917	2	1	1	103.74	108.03	0
1	2	1224	1188	1077	2	1	1	79.56	77.22	0							1	2	1554	1587	849	2	1	1	101.01	103.155	0
1	2	1251	1092	968	2	1	1	81.315	70.98	0							1	2	1425	1497	900	2	1	1	92.625	97.305	0
1	2	1113	987	953	2	1	1	72.345	64.155	0							1	2	1398	1398	822	2	1	1	90.87	90.87	0
1	2	1176	891	998	2	1	1	76.44	57.915	0							1	2	1977	1209	921	2	1	1	128.505	78.585	0
1	2	1233	840	944	2	1	1	80.145	54.6	0							1	2	1713	1251	919	2	1	1	111.345	81.315	0
1	2	1314	786	952	2	1	1	85.41	51.09	0							1	2	1788	1161	895	2	1	1	116.22	75.465	0
1	2	1359	717	1094	2	1	1	88.335	46.605	0							1	2	1746	1110	852	2	1	1	113.49	72.15	0
1	2	1338	675	982	2	1	1	86.97	43.875	0							1	2	1680	1047	893	2	1	1	109.2	68.055	0
1	2	1269	678	1000	2	1	1	82.485	44.07	0							1	2	1317	1104	845	2	1	1	85.605	71.76	0
1	2	1161	615	984	2	1	1	75.465	39.975	0							1	2	1200	960	819	2	1	1	78	62.4	0
1	2	1338	84	1093	2	1	1	86.97	5.46	0							1	2	1353	789	865	2	1	1	87.945	51.285	0
1	2	1527	378	977	2	1	1	99.255	24.57	0							1	2	1569	918	954	2	1	1	101.985	59.67	0
1	2	1407	435	1039	2	1	1	91.455	28.275	0							1	2	1614	999	826	2	1	1	104.91	64.935	0
1	2	1500	486	1033	2	1	1	97.5	31.59	0							1	2	1968	630	896	2	1	1	127.92	40.95	0
1	2	1929	72	1018	2	1	1	125.385	4.68	0							1	2	1677	690	891	2	1	1	109.005	44.85	0
1	2	1674	63	959	2	1	1	108.81	4.095	0							1	2	1137	813	912	2	1	1	73.905	52.845	0
1	2	1857	48	1019	2	1	1	120.705	3.12	0							1	2	1173	603	916	2	1	1	76.245	39.195	0
1	2	1671	144	1082	2	1	1	108.615	9.36	0							1	2	1716	423	845	2	1	1	111.54	27.495	0
1	2	1872	195	1031	2	1	1	121.68	12.675	0							1	2	1383	498	917	2	1	1	89.895	32.37	0
1	2	2022	321	1029	2	1	1	131.43	20.865	0							1	2	1194	414	894	2	1	1	77.61	26.91	0
1	2	1923	375	972	2	1	1	124.995	24.375	0							1	2	1113	384	926	2	1	1	72.345	24.96	0
1	2	1698	483	1087	2	1	1	110.37	31.395	0							1	2	1176	327	1012	2	1	1	76.44	21.255	0
1	2	1821	546	999	2	1	1	118.365	35.49	0							1	2	1305	270	975	2	1	1	84.825	17.55	0
1	2	1881	522	982	2	1	1	122.265	33.93	0							1	2	1674	165	955	2	1	1	108.81	10.725	0
1	2	1962	489	966	2	1	1	127.53	31.785	0							1	2	1902	135	929	2	1	1	123.63	8.775	0
1	2	1860	837	999	2	1	1	120.9	54.405	0							1	2	1659	45	893	2	1	1	107.835	2.925	0
1	2	1899	930	1068	2	1	1	123.435	60.45	0							1	2	1698	483	853	2	1	1	110.37	31.395	0
1	2	1743	870	998	2	1	1	113.295	56.55	0							1	2	1911	339	883	2	1	1	124.215	22.035	0
1	2	1740	804	998	2	1	1	113.1	52.26	0							1	2	1872	1083	833	2	1	1	121.68	70.395	0
1	2	1671	732	964	2	1	1	108.615	47.58	0							2	2	171	57	882	2	1	1	11.115	3.705	0
1	2	1485	900	1014	2	1	1	96.525	58.5	0							2	2	111	126	845	2	1	1	7.215	8.19	0
1	2	1863	987	983	2	1	1	121.095	64.155	0							2	2	138	204	836	2	1	1	8.97	13.26	0
1	2	1779	1065	1005	2	1	1	115.635	69.225	0							2	2	81	177	837	2	1	1	5.265	11.505	0
1	2	1446	1071	978	2	1	1	93.99	69.615	0							2	2	261	120	913	2	1	1	16.965	7.8	0
1	2	1518	1200	1000	2	1	1	98.67	78	0							2	2	408	117	846	2	1	1	26.52	7.605	0
1	2	1782	1347	1019	2	1	1	115.83	87.555	0							2	2	552	51	1050	2	1	1	35.88	3.315	0
1	2	1689	1368	980	2	1	1	109.785	88.92	0							2	2	261	285	867	2	1	1	16.965	18.525	0
1	2	1719	1512	980	2	1	1	111.735	98.28	0							2	2	123	537	801	2	1	1	7.995	34.905	0
1	2	1776	1887	995	2	1	1	115.44	122.655	0							2	2	153	591	839	2	1	1	9.945	38.415	0
1	2	1905	1572	1059	2	1	1	123.825	102.18	0							2	2	120	672	915	2	1	1	7.8	43.68	0
1	2	1356	1548	984	2	1	1	88.14	100.62	0							2	2	129	780	820	2	1	1	8.385	50.7	0
1	2	1446	1524	1030	2	1	1	93.99	99.06	0							2	2	345	678	912	2	1	1	22.425	44.07	0
1	2	1491	1572	945	2	1	1	96.915	102.18	0							2	2	369	480	900	2	1	1	23.985	31.2	0
1	2	1707	1446	1057	2	1	1	110.955	93.99	0							2	2	483	651	891	2	1	1	31.395	42.315	0
1	2	1779	1452	955	2	1	1	115.635	94.38	0							2	2	213	777	804	2	1	1	13.845	50.505	0
1	2	1872	1410	945	2	1	1	121.68	91.65	0							2	2	180	912	820	2	1	1	11.7	59.28	0
1	2	1986	1440	997	2	1	1	129.09	93.6	0							2	2	81	951	868	2	1	1	5.265	61.815	0
2	2	135	78	982	2	1	1	8.775	5.07	0							2	2	84	1032	767	2	1	1	5.46	67.08	0
2	2	210	75	1056	2	1	1	13.65	4.875	0							2	2	75	1107	821	2	1	1	4.875	71.955	0
2	2	96	219	982	2	1	1	6.24	14.235	0							2	2	225	1035	847	2	1	1	14.625	67.275	0
2	2	165	195	1001	2	1	1	10.725	12.675	0							2	2	336	1140	876	2	1	1	21.84	74.1	0
2	2	300	240	890	2	1	1	19.5	15.6	0							2	2	207	1449	831	2	1	1	13.455	94.185	0
2	2	258	315	972	2	1	1	16.77	20.475	0							2	2	255	1488	783	2	1	1	16.575	96.72	0
2	2	291	378	1008	2	1	1	18.915	24.57	0							2	2	339	1524	796	2	1	1	22.035	99.06	0
2	2	309	441	964	2	1	1	20.085	28.665	0							2	2	225	1602	845	2	1	1	14.625	104.13	0
2	2	144	492	984	2	1	1	9.36	31.98	0							2	2	366	1566	891	2	1	1	23.79	101.79	0
2	2	87	546	948	2	1	1	5.655	35.49	0							2	2	126	1698	907	2	1	1	8.19	110.37	0
2	2	39	588	1067	2	1	1	2.535	38.22	0							2	2	63	1821	843	2	1	1	4.095	118.365	0
2	2	63	453	942	2	1	1	4.095	29.445	0							2	2	252	1902	847	2	1	1	16.38	123.63	0
2	2	33	381	893	2	1	1	2.145	24.765	0							2	2	270	1713	823	2	1	1	17.55	111.345	0
2	2	291	540	1023	2	1	1	18.915	35.1	0							2	2	339	1725	745	2	1	1	22.035	112.125	0
2	2	291	624	1027	2	1	1	18.915	40.56	0							2	2	414	1662	813	2	1	1	26.91	108.03	0
2	2	186	630	954	2	1	1	12.09	40.95	0							2	2	147	1572	924	2	1	1	9.555	102.18	0
2	2	231	723	999	2	1	1	15.015	46.995	0							2	2	480	1617	866	2	1	1	31.2	105.105	0
2	2	195	816	1014	2	1	1	12.675	53.04	0							2	2	537	1656	818	2	1	1	34.905	107.64	0
2	2	258	870	939	2	1	1	16.77	56.55	0							2	2	504	1881	943	2	1	1	32.76	122.265	0
2	2	33	963	983	2	1	1	2.145	62.595	0							2	2	522	1821	862	2	1	1	33.93	118.365	0
2	2	171	963	967	2	1	1	11.115	62.595	0							2	2	576	1809	964	2	1	1	37.44	117.585	0
2	2	405	801	1000	2	1	1	26.325	52.065	0							2	2	636	1923	1106	2	1	1	41.34	124.995	0
2	2	297	1116	1046	2	1	1	19.305	72.54	0							2	2	744	1941	842	2	1	1	48.36	126.165	0
2	2	174	1182	1017	2	1	1	11.31	76.83	0							2	2	504	1515	852	2	1	1	32.76	98.475	0
2	2	165	1221	1040	2	1	1	10.725	79.365	0							2	2	543	1446	808	2	1	1	35.295	93.99	0
2	2	246	1350	1011	2	1	1	15.99	87.75	0							2	2	597	1371	849	2	1	1	38.805	89.115	0
2	2	147	1413	941	2	1	1	9.555	91.845	0							2	2	645	1341	781	2	1	1	41.925	87.165	0
2	2	234	1482	1048	2	1	1	15.21	96.33	0							2	2	564	1230	821	2	1	1	36.66	79.95	0
2	2	51	1584	1011	2	1	1	3.315	102.96	0							2	2	537	1287	774	2	1	1	34.905	83.655	0
2	2	165	1578	960	2	1	1	10.725	102.57	0							2	2	774	1332	892	2	1	1	50.31	86.58	0
2	2	297	1704	1025	2	1	1	19.305	110.76	0							2	2	747	1263	899	2	1	1	48.555	82.095	0
2	2	360	1674	967	2	1	1	23.4	108.81	0							2	2	867	1560	1048	2	1	1	56.355	101.4	0
2	2	456	1653	917	2	1	1	29.64	107.445	0							2	2	948	1866	859	2	1	1	61.62	121.29	0
2	2	501	1569	936	2	1	1	32.565	101.985	0							2	2	837	1959	822	2	1	1	54.405	127.335	0
2	2	153	1887	869	2	1	1	9.945	122.655	0							2	2	981	1539	884	2	1	1	63.765	100.035	0
2	2	240	1983	987	2	1	1	15.6	128.895	0							2	2	1038	1332	851	2	1	1	67.47	86.58	0
2	2	306	1974	982	2	1	1	19.89	128.31	0							2	2	900	1338	887	2	1	1	58.5	86.97	0
2	2	459	1974	951	2	1	1	29.835	128.31	0							2	2	894	1275	818	2	1	1	58.11	82.875	0
2	2	387	1986	927	2	1	1	25.155	129.09	0							2	2	936	1224	806	2	1	1	60.84	79.56	0
2	2	420	1770	1062	2	1	1	27.3	115.05	0							2	2	888	1191	884	2	1	1	57.72	77.415	0
2	2	447	1722	1036	2	1	1	29.055	111.93	0							2	2	723	1209	876	2	1	1	46.995	78.585	0
2	2	549	1866	952	2	1	1	35.685	121.29	0							2	2	813	1125	957	2	1	1	52.845	73.125	0
2	2	591	1803	1041	2	1	1	38.415	117.195	0							2	2	678	1074	849	2	1	1	44.07	69.81	0
2	2	636	1968	1044	2	1	1	41.34	127.92	0							2	2	588	1125	923	2	1	1	38.22	73.125	0
2	2	690	1920	955	2	1	1	44.85	124.8	0							2	2	705	1002	922	2	1	1	45.825	65.13	0
2	2	669	1821	988	2	1	1	43.485	118.365	0							2	2	843	1041	894	2	1	1	54.795	67.665	0
2	2	546	1635	979	2	1	1	35.49	106.275	0							2	2	681	849	906	2	1	1	44.265	55.185	0
2	2	606	1581	904	2	1	1	39.39	102.765	0							2	2	732	702	936	2	1	1	47.58	45.63	0
2	2	687	1584	975	2	1	1	44.655	102.96	0							2	2	606	456	807	2	1	1	39.39	29.64	0
2	2	582	1494	994	2	1	1	37.83	97.11	0							2	2	483	432	804	2	1	1	31.395	28.08	0
2	2	780	1986	989	2	1	1	50.7	129.09	0							2	2	540	360	863	2	1	1	35.1	23.4	0
2	2	870	1893	1121	2	1	1	56.55	123.045	0							2	2	552	276	967	2	1	1	35.88	17.94	0
2	2	936	1845	980	2	1	1	60.84	119.925	0							2	2	666	264	831	2	1	1	43.29	17.16	0
2	2	963	1746	968	2	1	1	62.595	113.49	0							2	2	627	198	815	2	1	1	40.755	12.87	0
2	2	825	1560	910	2	1	1	53.625	101.4	0							2	2	696	156	905	2	1	1	45.24	10.14	0
2	2	903	1584	1047	2	1	1	58.695	102.96	0							2	2	873	213	836	2	1	1	56.745	13.845	0
2	2	975	1611	901	2	1	1	63.375	104.715	0							2	2	765	264	851	2	1	1	49.725	17.16	0
2	2	837	1443	1028	2	1	1	54.405	93.795	0							2	2	855	288	914	2	1	1	55.575	18.72	0
2	2	765	1386	1000	2	1	1	49.725	90.09	0							2	2	927	240	966	2	1	1	60.255	15.6	0
2	2	690	1473	971	2	1	1	44.85	95.745	0							2	2	990	231	835	2	1	1	64.35	15.015	0
2	2	531	1260	1003	2	1	1	34.515	81.9	0							2	2	1002	300	812	2	1	1	65.13	19.5	0
2	2	513	1197	1130	2	1	1	33.345	77.805	0							2	2	717	348	901	2	1	1	46.605	22.62	0
2	2	516	1113	975	2	1	1	33.54	72.345	0							2	2	822	426	988	2	1	1	53.43	27.69	0
2	2	651	1149	958	2	1	1	42.315	74.685	0							2	2	876	423	897	2	1	1	56.94	27.495	0
2	2	729	924	1000	2	1	1	47.385	60.06	0							2	2	816	516	839	2	1	1	53.04	33.54	0
2	2	528	915	980	2	1	1	34.32	59.475	0							2	2	831	579	861	2	1	1	54.015	37.635	0
2	2	504	849	1038	2	1	1	32.76	55.185	0							2	2	993	732	932	2	1	1	64.545	47.58	0
2	2	588	801	992	2	1	1	38.22	52.065	0							2	2	1080	1182	828	2	1	1	70.2	76.83	0
2	2	456	672	1002	2	1	1	29.64	43.68	0							2	2	1134	1761	864	2	1	1	73.71	114.465	0
2	2	417	612	1033	2	1	1	27.105	39.78	0							2	2	1170	1941	813	2	1	1	76.05	126.165	0
2	2	453	591	1007	2	1	1	29.445	38.415	0							2	2	1242	1947	888	2	1	1	80.73	126.555	0
2	2	591	630	957	2	1	1	38.415	40.95	0							2	2	1242	1713	928	2	1	1	80.73	111.345	0
2	2	585	690	985	2	1	1	38.025	44.85	0							2	2	1293	1554	765	2	1	1	84.045	101.01	0
2	2	789	843	995	2	1	1	51.285	54.795	0							2	2	1377	1893	825	2	1	1	89.505	123.045	0
2	2	711	834	1037	2	1	1	46.215	54.21	0							2	2	1428	1803	914	2	1	1	92.82	117.195	0
2	2	786	762	1001	2	1	1	51.09	49.53	0							2	2	1524	1806	811	2	1	1	99.06	117.39	0
2	2	690	774	974	2	1	1	44.85	50.31	0							2	2	1512	1881	893	2	1	1	98.28	122.265	0
2	2	558	543	974	2	1	1	36.27	35.295	0							2	2	1704	1737	863	2	1	1	110.76	112.905	0
2	2	471	528	968	2	1	1	30.615	34.32	0							2	2	1881	1614	871	2	1	1	122.265	104.91	0
2	2	468	459	998	2	1	1	30.42	29.835	0							2	2	1377	1659	801	2	1	1	89.505	107.835	0
2	2	426	384	1062	2	1	1	27.69	24.96	0							2	2	1377	1602	891	2	1	1	89.505	104.13	0
2	2	519	375	961	2	1	1	33.735	24.375	0							2	2	1383	1335	883	2	1	1	89.895	86.775	0
2	2	507	315	1013	2	1	1	32.955	20.475	0							2	2	1401	1260	897	2	1	1	91.065	81.9	0
2	2	747	600	1103	2	1	1	48.555	39	0							2	2	1575	1314	871	2	1	1	102.375	85.41	0
2	2	792	546	1071	2	1	1	51.48	35.49	0							2	2	1644	1338	845	2	1	1	106.86	86.97	0
2	2	810	480	968	2	1	1	52.65	31.2	0							2	2	1737	1377	817	2	1	1	112.905	89.505	0
2	2	630	456	930	2	1	1	40.95	29.64	0							2	2	1839	1410	974	2	1	1	119.535	91.65	0
2	2	678	405	977	2	1	1	44.07	26.325	0							2	2	1836	1542	830	2	1	1	119.34	100.23	0
2	2	453	171	1010	2	1	1	29.445	11.115	0							2	2	1857	1479	801	2	1	1	120.705	96.135	0
2	2	540	147	965	2	1	1	35.1	9.555	0							2	2	1983	1389	840	2	1	1	128.895	90.285	0
2	2	567	225	1010	2	1	1	36.855	14.625	0							2	2	1938	1128	897	2	1	1	125.97	73.32	0
2	2	744	258	919	2	1	1	48.36	16.77	0							2	2	1839	1221	941	2	1	1	119.535	79.365	0
2	2	846	63	1023	2	1	1	54.99	4.095	0							2	2	1290	1176	900	2	1	1	83.85	76.44	0
2	2	1002	48	969	2	1	1	65.13	3.12	0							2	2	1476	1209	877	2	1	1	95.94	78.585	0
2	2	1128	102	974	2	1	1	73.32	6.63	0							2	2	1500	1149	882	2	1	1	97.5	74.685	0
2	2	1089	33	1051	2	1	1	70.785	2.145	0							2	2	1305	1002	879	2	1	1	84.825	65.13	0
2	2	1050	123	1048	2	1	1	68.25	7.995	0							2	2	1410	990	884	2	1	1	91.65	64.35	0
2	2	1110	282	1004	2	1	1	72.15	18.33	0							2	2	1476	999	1241	2	1	1	95.94	64.935	0
2	2	1011	294	1111	2	1	1	65.715	19.11	0							2	2	1734	948	860	2	1	1	112.71	61.62	0
2	2	957	357	919	2	1	1	62.205	23.205	0							2	2	1683	936	958	2	1	1	109.395	60.84	0
2	2	879	384	941	2	1	1	57.135	24.96	0							2	2	1809	861	840	2	1	1	117.585	55.965	0
2	2	1071	381	967	2	1	1	69.615	24.765	0							2	2	2007	987	819	2	1	1	130.455	64.155	0
2	2	945	492	1042	2	1	1	61.425	31.98	0							2	2	1995	825	795	2	1	1	129.675	53.625	0
2	2	1170	324	1017	2	1	1	76.05	21.06	0							2	2	1272	876	846	2	1	1	82.68	56.94	0
2	2	1104	480	909	2	1	1	71.76	31.2	0							2	2	1164	888	847	2	1	1	75.66	57.72	0
2	2	1083	543	1077	2	1	1	70.395	35.295	0							2	2	1269	807	801	2	1	1	82.485	52.455	0
2	2	855	696	1068	2	1	1	55.575	45.24	0							2	2	1806	714	1014	2	1	1	117.39	46.41	0
2	2	882	768	1059	2	1	1	57.33	49.92	0							2	2	1890	555	886	2	1	1	122.85	36.075	0
2	2	1002	720	1031	2	1	1	65.13	46.8	0							2	2	1824	567	857	2	1	1	118.56	36.855	0
2	2	834	1275	950	2	1	1	54.21	82.875	0							2	2	1806	531	919	2	1	1	117.39	34.515	0
2	2	984	1041	973	2	1	1	63.96	67.665	0							2	2	1725	558	865	2	1	1	112.125	36.27	0
2	2	1044	1107	973	2	1	1	67.86	71.955	0							2	2	1566	663	867	2	1	1	101.79	43.095	0
2	2	984	1362	1026	2	1	1	63.96	88.53	0							2	2	1485	708	884	2	1	1	96.525	46.02	0
2	2	1110	1323	949	2	1	1	72.15	85.995	0							2	2	1452	606	880	2	1	1	94.38	39.39	0
2	2	1125	1446	1021	2	1	1	73.125	93.99	0							2	2	1479	561	813	2	1	1	96.135	36.465	0
2	2	981	1992	968	2	1	1	63.765	129.48	0							2	2	1290	621	862	2	1	1	83.85	40.365	0
2	2	1041	2010	897	2	1	1	67.665	130.65	0							2	2	1305	495	848	2	1	1	84.825	32.175	0
2	2	1077	1818	915	2	1	1	70.005	118.17	0							2	2	1386	339	850	2	1	1	90.09	22.035	0
2	2	1107	1869	970	2	1	1	71.955	121.485	0							2	2	1470	336	920	2	1	1	95.55	21.84	0
2	2	1251	1782	979	2	1	1	81.315	115.83	0							2	2	1392	255	959	2	1	1	90.48	16.575	0
2	2	1254	1671	951	2	1	1	81.51	108.615	0							2	2	1461	240	944	2	1	1	94.965	15.6	0
2	2	1260	1485	994	2	1	1	81.9	96.525	0							2	2	1536	270	872	2	1	1	99.84	17.55	0
2	2	1212	1332	927	2	1	1	78.78	86.58	0							2	2	1527	117	1512	2	1	1	99.255	7.605	0
2	2	1317	1239	1018	2	1	1	85.605	80.535	0							2	2	1254	63	961	2	1	1	81.51	4.095	0
2	2	1113	1221	957	2	1	1	72.345	79.365	0							2	2	1953	198	788	2	1	1	126.945	12.87	0
2	2	1143	909	1038	2	1	1	74.295	59.085	0							2	2	2007	258	819	2	1	1	130.455	16.77	0
2	2	1230	987	953	2	1	1	79.95	64.155	0
2	2	1278	1005	1013	2	1	1	83.07	65.325	0
2	2	1344	945	1022	2	1	1	87.36	61.425	0
2	2	1419	774	1012	2	1	1	92.235	50.31	0
2	2	1230	597	1115	2	1	1	79.95	38.805	0
2	2	1242	366	938	2	1	1	80.73	23.79	0
2	2	1281	264	1084	2	1	1	83.265	17.16	0
2	2	1278	186	925	2	1	1	83.07	12.09	0
2	2	1347	213	929	2	1	1	87.555	13.845	0
2	2	1485	174	1018	2	1	1	96.525	11.31	0
2	2	1536	120	1071	2	1	1	99.84	7.8	0
2	2	1458	552	988	2	1	1	94.77	35.88	0
2	2	1338	405	960	2	1	1	86.97	26.325	0
2	2	1455	681	1019	2	1	1	94.575	44.265	0
2	2	1548	627	1052	2	1	1	100.62	40.755	0
2	2	1563	732	1018	2	1	1	101.595	47.58	0
2	2	1944	159	1033	2	1	1	126.36	10.335	0
2	2	1740	147	1084	2	1	1	113.1	9.555	0
2	2	1716	234	1173	2	1	1	111.54	15.21	0
2	2	1662	243	1167	2	1	1	108.03	15.795	0
2	2	1668	381	1034	2	1	1	108.42	24.765	0
2	2	1740	396	1040	2	1	1	113.1	25.74	0
2	2	1797	321	1060	2	1	1	116.805	20.865	0
2	2	1872	711	988	2	1	1	121.68	46.215	0
2	2	1935	780	1061	2	1	1	125.775	50.7	0
2	2	1959	879	1089	2	1	1	127.335	57.135	0
2	2	1656	816	989	2	1	1	107.64	53.04	0
2	2	1671	867	1016	2	1	1	108.615	56.355	0
2	2	1860	1077	980	2	1	1	120.9	70.005	0
2	2	1968	1062	1050	2	1	1	127.92	69.03	0
2	2	1854	1149	1014	2	1	1	120.51	74.685	0
2	2	1770	1206	977	2	1	1	115.05	78.39	0
2	2	1659	1056	954	2	1	1	107.835	68.64	0
2	2	1437	1134	1012	2	1	1	93.405	73.71	0
2	2	1395	1089	1075	2	1	1	90.675	70.785	0
2	2	1527	1260	1020	2	1	1	99.255	81.9	0
2	2	1662	1251	1053	2	1	1	108.03	81.315	0
2	2	1635	2007	1002	2	1	1	106.275	130.455	0
2	2	1602	1812	928	2	1	1	104.13	117.78	0
2	2	1563	1857	1011	2	1	1	101.595	120.705	0
2	2	1548	1611	958	2	1	1	100.62	104.715	0
2	2	1512	1491	991	2	1	1	98.28	96.915	0

## Sheet: 4768
4768_0'_#.nd2																	4768_0'_#003.nd2																	4768_15'_#.nd2
Type	Slice	X	Y	Value	C-pos	Z-pos	T-pos	X(pixel)	Y(pixel)	Z(pixel)		Key	Number	Proportion			Type	Slice	X	Y	Value	C-pos	Z-pos	T-pos	X(pixel)	Y(pixel)	Z(pixel)		Key	Number	Proportion			Type	Slice	X	Y	Value	C-pos	Z-pos	T-pos	X(pixel)	Y(pixel)	Z(pixel)		Key	Number	Proportion
1	2	348	51	1757	2	1	1	22.62	3.315	0		1=astrals	194	0.514589			1	2	435	51	1055	2	1	1	28.275	3.315	0		1=astrals	156	0.52			1	2	201	267	1358	2	1	1	13.065	17.355	0		1=astrals	102	0.377778
1	2	279	21	1635	2	1	1	18.135	1.365	0		2=no astrals	183	0.485411			1	2	447	114	1502	2	1	1	29.055	7.41	0		2=no astrals	144	0.48			1	2	276	135	1398	2	1	1	17.94	8.775	0		2=no astrals	168	0.622222
1	2	222	63	1668	2	1	1	14.43	4.095	0		Total	377				1	2	207	114	1162	2	1	1	13.455	7.41	0		Total	300				1	2	501	102	1467	2	1	1	32.565	6.63	0		Total	270
1	2	114	93	1545	2	1	1	7.41	6.045	0							1	2	105	156	1094	2	1	1	6.825	10.14	0							1	2	285	387	1430	2	1	1	18.525	25.155	0
1	2	111	183	1714	2	1	1	7.215	11.895	0							1	2	177	228	998	2	1	1	11.505	14.82	0							1	2	189	369	1567	2	1	1	12.285	23.985	0
1	2	204	165	1662	2	1	1	13.26	10.725	0							1	2	159	291	1068	2	1	1	10.335	18.915	0							1	2	18	390	1408	2	1	1	1.17	25.35	0
1	2	285	111	1776	2	1	1	18.525	7.215	0							1	2	282	318	1039	2	1	1	18.33	20.67	0							1	2	306	633	1421	2	1	1	19.89	41.145	0
1	2	384	78	1633	2	1	1	24.96	5.07	0							1	2	360	351	1102	2	1	1	23.4	22.815	0							1	2	264	714	1348	2	1	1	17.16	46.41	0
1	2	411	162	1830	2	1	1	26.715	10.53	0							1	2	192	381	1130	2	1	1	12.48	24.765	0							1	2	33	732	1447	2	1	1	2.145	47.58	0
1	2	438	228	1960	2	1	1	28.47	14.82	0							1	2	129	366	1340	2	1	1	8.385	23.79	0							1	2	120	744	1348	2	1	1	7.8	48.36	0
1	2	552	138	1922	2	1	1	35.88	8.97	0							1	2	81	501	1163	2	1	1	5.265	32.565	0							1	2	195	1035	1311	2	1	1	12.675	67.275	0
1	2	609	81	1819	2	1	1	39.585	5.265	0							1	2	165	531	1062	2	1	1	10.725	34.515	0							1	2	63	1125	1519	2	1	1	4.095	73.125	0
1	2	267	465	1616	2	1	1	17.355	30.225	0							1	2	324	585	1111	2	1	1	21.06	38.025	0							1	2	63	1125	1519	2	1	1	4.095	73.125	0
1	2	324	435	2093	2	1	1	21.06	28.275	0							1	2	375	405	1366	2	1	1	24.375	26.325	0							1	2	171	1212	1256	2	1	1	11.115	78.78	0
1	2	600	330	1838	2	1	1	39	21.45	0							1	2	483	429	1326	2	1	1	31.395	27.885	0							1	2	498	1464	1362	2	1	1	32.37	95.16	0
1	2	681	294	1939	2	1	1	44.265	19.11	0							1	2	462	588	1079	2	1	1	30.03	38.22	0							1	2	261	1128	1316	2	1	1	16.965	73.32	0
1	2	624	201	1689	2	1	1	40.56	13.065	0							1	2	510	711	1177	2	1	1	33.15	46.215	0							1	2	171	1548	1168	2	1	1	11.115	100.62	0
1	2	714	201	2021	2	1	1	46.41	13.065	0							1	2	324	750	1130	2	1	1	21.06	48.75	0							1	2	72	1653	1315	2	1	1	4.68	107.445	0
1	2	720	108	1739	2	1	1	46.8	7.02	0							1	2	246	693	1124	2	1	1	15.99	45.045	0							1	2	228	1686	1414	2	1	1	14.82	109.59	0
1	2	795	141	1760	2	1	1	51.675	9.165	0							1	2	135	768	1134	2	1	1	8.775	49.92	0							1	2	261	1926	1348	2	1	1	16.965	125.19	0
1	2	558	588	1763	2	1	1	36.27	38.22	0							1	2	54	747	1049	2	1	1	3.51	48.555	0							1	2	330	1935	1354	2	1	1	21.45	125.775	0
1	2	504	471	1912	2	1	1	32.76	30.615	0							1	2	195	813	1012	2	1	1	12.675	52.845	0							1	2	303	2007	1508	2	1	1	19.695	130.455	0
1	2	768	495	1664	2	1	1	49.92	32.175	0							1	2	105	879	1242	2	1	1	6.825	57.135	0							1	2	600	1836	1300	2	1	1	39	119.34	0
1	2	801	549	1628	2	1	1	52.065	35.685	0							1	2	291	828	1567	2	1	1	18.915	53.82	0							1	2	663	1716	1192	2	1	1	43.095	111.54	0
1	2	723	660	1633	2	1	1	46.995	42.9	0							1	2	198	954	1056	2	1	1	12.87	62.01	0							1	2	579	1503	1384	2	1	1	37.635	97.695	0
1	2	645	600	1606	2	1	1	41.925	39	0							1	2	237	1026	1406	2	1	1	15.405	66.69	0							1	2	663	1185	1220	2	1	1	43.095	77.025	0
1	2	606	654	1598	2	1	1	39.39	42.51	0							1	2	291	1008	1166	2	1	1	18.915	65.52	0							1	2	540	768	1352	2	1	1	35.1	49.92	0
1	2	57	666	1807	2	1	1	3.705	43.29	0							1	2	123	1023	1067	2	1	1	7.995	66.495	0							1	2	453	582	1339	2	1	1	29.445	37.83	0
1	2	156	642	1580	2	1	1	10.14	41.73	0							1	2	153	1086	1269	2	1	1	9.945	70.59	0							1	2	270	495	1399	2	1	1	17.55	32.175	0
1	2	231	639	1577	2	1	1	15.015	41.535	0							1	2	462	1032	1063	2	1	1	30.03	67.08	0							1	2	258	588	1514	2	1	1	16.77	38.22	0
1	2	312	591	1562	2	1	1	20.28	38.415	0							1	2	336	1137	1136	2	1	1	21.84	73.905	0							1	2	201	531	1402	2	1	1	13.065	34.515	0
1	2	318	732	1608	2	1	1	20.67	47.58	0							1	2	357	1221	1063	2	1	1	23.205	79.365	0							1	2	678	300	1327	2	1	1	44.07	19.5	0
1	2	456	588	1803	2	1	1	29.64	38.22	0							1	2	270	1239	1108	2	1	1	17.55	80.535	0							1	2	744	144	1307	2	1	1	48.36	9.36	0
1	2	96	819	1786	2	1	1	6.24	53.235	0							1	2	120	1209	1037	2	1	1	7.8	78.585	0							1	2	939	369	1367	2	1	1	61.035	23.985	0
1	2	171	777	1614	2	1	1	11.115	50.505	0							1	2	177	1323	1061	2	1	1	11.505	85.995	0							1	2	1182	60	1283	2	1	1	76.83	3.9	0
1	2	246	813	1774	2	1	1	15.99	52.845	0							1	2	231	1398	1126	2	1	1	15.015	90.87	0							1	2	1536	189	1347	2	1	1	99.84	12.285	0
1	2	687	834	1474	2	1	1	44.655	54.21	0							1	2	42	1395	1051	2	1	1	2.73	90.675	0							1	2	1941	180	1488	2	1	1	126.165	11.7	0
1	2	639	918	1567	2	1	1	41.535	59.67	0							1	2	381	1458	1083	2	1	1	24.765	94.77	0							1	2	1833	120	1265	2	1	1	119.145	7.8	0
1	2	636	1032	1639	2	1	1	41.34	67.08	0							1	2	372	1530	1182	2	1	1	24.18	99.45	0							1	2	1950	429	1450	2	1	1	126.75	27.885	0
1	2	591	990	1635	2	1	1	38.415	64.35	0							1	2	327	1608	1058	2	1	1	21.255	104.52	0							1	2	1821	480	1274	2	1	1	118.365	31.2	0
1	2	516	978	1809	2	1	1	33.54	63.57	0							1	2	264	1605	1100	2	1	1	17.16	104.325	0							1	2	1389	399	1478	2	1	1	90.285	25.935	0
1	2	678	1092	1626	2	1	1	44.07	70.98	0							1	2	72	1647	1075	2	1	1	4.68	107.055	0							1	2	1371	504	1288	2	1	1	89.115	32.76	0
1	2	690	1191	1811	2	1	1	44.85	77.415	0							1	2	171	1716	966	2	1	1	11.115	111.54	0							1	2	1170	510	1568	2	1	1	76.05	33.15	0
1	2	591	1080	1658	2	1	1	38.415	70.2	0							1	2	129	1860	1044	2	1	1	8.385	120.9	0							1	2	1104	150	1657	2	1	1	71.76	9.75	0
1	2	591	1167	1718	2	1	1	38.415	75.855	0							1	2	57	1848	1114	2	1	1	3.705	120.12	0							1	2	978	576	1405	2	1	1	63.57	37.44	0
1	2	561	1233	1628	2	1	1	36.465	80.145	0							1	2	60	1920	1084	2	1	1	3.9	124.8	0							1	2	1566	642	1569	2	1	1	101.79	41.73	0
1	2	444	1020	1654	2	1	1	28.86	66.3	0							1	2	249	2001	1145	2	1	1	16.185	130.065	0							1	2	1632	675	1400	2	1	1	106.08	43.875	0
1	2	348	1173	1908	2	1	1	22.62	76.245	0							1	2	249	1815	1114	2	1	1	16.185	117.975	0							1	2	1665	603	1387	2	1	1	108.225	39.195	0
1	2	429	1191	1517	2	1	1	27.885	77.415	0							1	2	339	1821	1045	2	1	1	22.035	118.365	0							1	2	1812	663	1461	2	1	1	117.78	43.095	0
1	2	225	1125	1820	2	1	1	14.625	73.125	0							1	2	453	825	1130	2	1	1	29.445	53.625	0							1	2	1875	789	1351	2	1	1	121.875	51.285	0
1	2	198	1251	1621	2	1	1	12.87	81.315	0							1	2	564	1065	1050	2	1	1	36.66	69.225	0							1	2	1566	1002	1606	2	1	1	101.79	65.13	0
1	2	108	1287	1795	2	1	1	7.02	83.655	0							1	2	474	1188	1065	2	1	1	30.81	77.22	0							1	2	1296	927	1496	2	1	1	84.24	60.255	0
1	2	153	1203	1780	2	1	1	9.945	78.195	0							1	2	408	1248	960	2	1	1	26.52	81.12	0							1	2	1218	918	1413	2	1	1	79.17	59.67	0
1	2	129	1368	1539	2	1	1	8.385	88.92	0							1	2	456	1311	1022	2	1	1	29.64	85.215	0							1	2	1035	909	1336	2	1	1	67.275	59.085	0
1	2	213	1401	1652	2	1	1	13.845	91.065	0							1	2	468	1383	1073	2	1	1	30.42	89.895	0							1	2	948	897	1371	2	1	1	61.62	58.305	0
1	2	474	1356	1567	2	1	1	30.81	88.14	0							1	2	540	1641	1083	2	1	1	35.1	106.665	0							1	2	873	849	1350	2	1	1	56.745	55.185	0
1	2	282	1446	1546	2	1	1	18.33	93.99	0							1	2	543	786	1226	2	1	1	35.295	51.09	0							1	2	759	909	1432	2	1	1	49.335	59.085	0
1	2	111	1638	1620	2	1	1	7.215	106.47	0							1	2	627	861	1084	2	1	1	40.755	55.965	0							1	2	735	657	1481	2	1	1	47.775	42.705	0
1	2	93	1935	1673	2	1	1	6.045	125.775	0							1	2	564	1215	1111	2	1	1	36.66	78.975	0							1	2	1023	1941	1525	2	1	1	66.495	126.165	0
1	2	144	1878	1645	2	1	1	9.36	122.07	0							1	2	594	1995	1085	2	1	1	38.61	129.675	0							1	2	1965	1725	1359	2	1	1	127.725	112.125	0
1	2	264	1905	1623	2	1	1	17.16	123.825	0							1	2	651	1980	1044	2	1	1	42.315	128.7	0							1	2	1797	1710	1485	2	1	1	116.805	111.15	0
1	2	318	1890	1599	2	1	1	20.67	122.85	0							1	2	681	1917	1006	2	1	1	44.265	124.605	0							1	2	1953	1656	1400	2	1	1	126.945	107.64	0
1	2	255	1848	1748	2	1	1	16.575	120.12	0							1	2	606	1923	989	2	1	1	39.39	124.995	0							1	2	1695	1329	1301	2	1	1	110.175	86.385	0
1	2	303	1788	1527	2	1	1	19.695	116.22	0							1	2	582	1845	1017	2	1	1	37.83	119.925	0							1	2	1605	1380	1492	2	1	1	104.325	89.7	0
1	2	393	1767	1569	2	1	1	25.545	114.855	0							1	2	747	1824	1103	2	1	1	48.555	118.56	0							1	2	1845	1857	1392	2	1	1	119.925	120.705	0
1	2	456	1713	1865	2	1	1	29.64	111.345	0							1	2	774	2022	1101	2	1	1	50.31	131.43	0							1	2	1272	519	1476	2	1	1	82.68	33.735	0
1	2	231	1980	1593	2	1	1	15.015	128.7	0							1	2	891	1821	976	2	1	1	57.915	118.365	0							1	2	1266	354	1436	2	1	1	82.29	23.01	0
1	2	795	1917	1844	2	1	1	51.675	124.605	0							1	2	894	1695	1132	2	1	1	58.11	110.175	0							1	2	1308	108	1646	2	1	1	85.02	7.02	0
1	2	858	1830	1499	2	1	1	55.77	118.95	0							1	2	708	1506	1165	2	1	1	46.02	97.89	0							1	2	1626	876	1468	2	1	1	105.69	56.94	0
1	2	696	1725	1664	2	1	1	45.24	112.125	0							1	2	690	1383	1072	2	1	1	44.85	89.895	0							1	2	1227	1251	1638	2	1	1	79.755	81.315	0
1	2	642	1698	1610	2	1	1	41.73	110.37	0							1	2	891	1422	1044	2	1	1	57.915	92.43	0							1	2	1059	1326	1539	2	1	1	68.835	86.19	0
1	2	579	1623	1821	2	1	1	37.635	105.495	0							1	2	846	1239	1235	2	1	1	54.99	80.535	0							1	2	996	1608	1316	2	1	1	64.74	104.52	0
1	2	582	1284	1624	2	1	1	37.83	83.46	0							1	2	726	1119	994	2	1	1	47.19	72.735	0							1	2	1557	1605	1488	2	1	1	101.205	104.325	0
1	2	762	1353	1689	2	1	1	49.53	87.945	0							1	2	807	1068	1008	2	1	1	52.455	69.42	0							1	2	1845	1482	1520	2	1	1	119.925	96.33	0
1	2	882	1422	1631	2	1	1	57.33	92.43	0							1	2	894	1077	1177	2	1	1	58.11	70.005	0							1	2	1836	1287	1421	2	1	1	119.34	83.655	0
1	2	873	1530	1624	2	1	1	56.745	99.45	0							1	2	966	1140	1222	2	1	1	62.79	74.1	0							1	2	1995	1593	1276	2	1	1	129.675	103.545	0
1	2	795	1677	1364	2	1	1	51.675	109.005	0							1	2	1047	1095	1248	2	1	1	68.055	71.175	0							1	2	792	975	1495	2	1	1	51.48	63.375	0
1	2	996	1893	1925	2	1	1	64.74	123.045	0							1	2	837	951	1045	2	1	1	54.405	61.815	0							1	2	1311	579	1376	2	1	1	85.215	37.635	0
1	2	1044	1527	1438	2	1	1	67.86	99.255	0							1	2	915	798	1089	2	1	1	59.475	51.87	0							1	2	390	801	1474	2	1	1	25.35	52.065	0
1	2	1032	1413	1617	2	1	1	67.08	91.845	0							1	2	858	588	1456	2	1	1	55.77	38.22	0							1	2	267	891	1368	2	1	1	17.355	57.915	0
1	2	777	1098	1745	2	1	1	50.505	71.37	0							1	2	945	588	1091	2	1	1	61.425	38.22	0							1	2	375	909	1406	2	1	1	24.375	59.085	0
1	2	834	1044	1645	2	1	1	54.21	67.86	0							1	2	753	558	1082	2	1	1	48.945	36.27	0							1	2	444	960	1291	2	1	1	28.86	62.4	0
1	2	780	987	1837	2	1	1	50.7	64.155	0							1	2	612	267	1183	2	1	1	39.78	17.355	0							1	2	150	1875	1617	2	1	1	9.75	121.875	0
1	2	783	873	1660	2	1	1	50.895	56.745	0							1	2	687	348	1309	2	1	1	44.655	22.62	0							1	2	765	1776	1546	2	1	1	49.725	115.44	0
1	2	960	894	1492	2	1	1	62.4	58.11	0							1	2	831	321	1294	2	1	1	54.015	20.865	0							1	2	2016	1035	1400	2	1	1	131.04	67.275	0
1	2	906	825	1582	2	1	1	58.89	53.625	0							1	2	768	213	1003	2	1	1	49.92	13.845	0							1	2	1989	963	1357	2	1	1	129.285	62.595	0
1	2	759	777	1662	2	1	1	49.335	50.505	0							1	2	633	150	1113	2	1	1	41.145	9.75	0							1	2	1872	903	1370	2	1	1	121.68	58.695	0
1	2	984	636	1826	2	1	1	63.96	41.34	0							1	2	609	72	1305	2	1	1	39.585	4.68	0							1	2	804	579	1455	2	1	1	52.26	37.635	0
1	2	1038	483	1781	2	1	1	67.47	31.395	0							1	2	669	18	1116	2	1	1	43.485	1.17	0							1	2	963	501	1287	2	1	1	62.595	32.565	0
1	2	954	462	1979	2	1	1	62.01	30.03	0							1	2	921	54	1235	2	1	1	59.865	3.51	0							1	2	1773	375	1318	2	1	1	115.245	24.375	0
1	2	1002	417	1904	2	1	1	65.13	27.105	0							1	2	975	126	1004	2	1	1	63.375	8.19	0							1	2	1872	222	1302	2	1	1	121.68	14.43	0
1	2	786	396	1702	2	1	1	51.09	25.74	0							1	2	1005	648	1233	2	1	1	65.325	42.12	0							1	2	1818	33	1349	2	1	1	118.17	2.145	0
1	2	879	111	1696	2	1	1	57.135	7.215	0							1	2	966	720	1120	2	1	1	62.79	46.8	0							1	2	2019	93	1531	2	1	1	131.235	6.045	0
1	2	915	12	1912	2	1	1	59.475	0.78	0							1	2	993	1368	1138	2	1	1	64.545	88.92	0							1	2	1968	501	2186	2	1	1	127.92	32.565	0
1	2	1137	156	2219	2	1	1	73.905	10.14	0							1	2	1047	1365	1145	2	1	1	68.055	88.725	0							1	2	1431	1095	1506	2	1	1	93.015	71.175	0
1	2	1068	294	1767	2	1	1	69.42	19.11	0							1	2	1050	1758	1163	2	1	1	68.25	114.27	0							1	2	1371	1074	1188	2	1	1	89.115	69.81	0
1	2	1131	333	1860	2	1	1	73.515	21.645	0							1	2	843	1584	1209	2	1	1	54.795	102.96	0							1	2	1254	1065	1306	2	1	1	81.51	69.225	0
1	2	1203	318	1850	2	1	1	78.195	20.67	0							1	2	993	1536	1095	2	1	1	64.545	99.84	0							1	2	1182	1086	1360	2	1	1	76.83	70.59	0
1	2	1203	432	1734	2	1	1	78.195	28.08	0							1	2	1074	1536	1103	2	1	1	69.81	99.84	0							1	2	1182	948	1337	2	1	1	76.83	61.62	0
1	2	1269	357	1615	2	1	1	82.485	23.205	0							1	2	1089	1584	1035	2	1	1	70.785	102.96	0							1	2	1578	1698	1530	2	1	1	102.57	110.37	0
1	2	1134	540	1855	2	1	1	73.71	35.1	0							1	2	1182	1674	1041	2	1	1	76.83	108.81	0							1	2	1635	1506	1204	2	1	1	106.275	97.89	0
1	2	978	969	1798	2	1	1	63.57	62.985	0							1	2	1326	1545	1061	2	1	1	86.19	100.425	0							1	2	1533	1515	1330	2	1	1	99.645	98.475	0
1	2	942	1056	1610	2	1	1	61.23	68.64	0							1	2	1164	1353	1090	2	1	1	75.66	87.945	0							2	2	120	90	1381	2	1	1	7.8	5.85	0
1	2	1026	1047	1647	2	1	1	66.69	68.055	0							1	2	1107	1302	1161	2	1	1	71.955	84.63	0							2	2	201	99	1297	2	1	1	13.065	6.435	0
1	2	1113	1059	1637	2	1	1	72.345	68.835	0							1	2	1152	1077	1286	2	1	1	74.88	70.005	0							2	2	273	219	1636	2	1	1	17.745	14.235	0
1	2	1200	1161	1745	2	1	1	78	75.465	0							1	2	1155	945	1124	2	1	1	75.075	61.425	0							2	2	342	174	1311	2	1	1	22.23	11.31	0
1	2	873	885	1667	2	1	1	56.745	57.525	0							1	2	1344	849	1153	2	1	1	87.36	55.185	0							2	2	435	225	1276	2	1	1	28.275	14.625	0
1	2	1143	1215	1607	2	1	1	74.295	78.975	0							1	2	1239	849	1142	2	1	1	80.535	55.185	0							2	2	408	294	1352	2	1	1	26.52	19.11	0
1	2	1044	1275	2484	2	1	1	67.86	82.875	0							1	2	1260	717	1476	2	1	1	81.9	46.605	0							2	2	363	357	1521	2	1	1	23.595	23.205	0
1	2	894	1152	1783	2	1	1	58.11	74.88	0							1	2	1215	642	980	2	1	1	78.975	41.73	0							2	2	246	405	1274	2	1	1	15.99	26.325	0
1	2	939	1221	1815	2	1	1	61.035	79.365	0							1	2	1179	531	1145	2	1	1	76.635	34.515	0							2	2	105	531	1441	2	1	1	6.825	34.515	0
1	2	1236	1224	1512	2	1	1	80.34	79.56	0							1	2	1113	657	1003	2	1	1	72.345	42.705	0							2	2	105	594	1277	2	1	1	6.825	38.61	0
1	2	1176	1287	1647	2	1	1	76.44	83.655	0							1	2	1092	372	1227	2	1	1	70.98	24.18	0							2	2	180	588	1472	2	1	1	11.7	38.22	0
1	2	1266	1242	1704	2	1	1	82.29	80.73	0							1	2	1353	273	1186	2	1	1	87.945	17.745	0							2	2	189	675	1725	2	1	1	12.285	43.875	0
1	2	1284	1350	1728	2	1	1	83.46	87.75	0							1	2	1329	651	1134	2	1	1	86.385	42.315	0							2	2	255	801	1336	2	1	1	16.575	52.065	0
1	2	1254	1434	1593	2	1	1	81.51	93.21	0							1	2	1464	723	1169	2	1	1	95.16	46.995	0							2	2	120	822	1468	2	1	1	7.8	53.43	0
1	2	1191	1884	1631	2	1	1	77.415	122.46	0							1	2	1512	705	1209	2	1	1	98.28	45.825	0							2	2	156	891	1315	2	1	1	10.14	57.915	0
1	2	1497	2013	1952	2	1	1	97.305	130.845	0							1	2	1512	486	1270	2	1	1	98.28	31.59	0							2	2	84	894	1510	2	1	1	5.46	58.11	0
1	2	1659	2004	1810	2	1	1	107.835	130.26	0							1	2	1533	561	1263	2	1	1	99.645	36.465	0							2	2	372	711	1223	2	1	1	24.18	46.215	0
1	2	1644	1959	1599	2	1	1	106.86	127.335	0							1	2	1446	1230	1046	2	1	1	93.99	79.95	0							2	2	309	867	1258	2	1	1	20.085	56.355	0
1	2	1626	1896	1689	2	1	1	105.69	123.24	0							1	2	1401	1209	1159	2	1	1	91.065	78.585	0							2	2	330	939	1497	2	1	1	21.45	61.035	0
1	2	1701	1890	1592	2	1	1	110.565	122.85	0							1	2	1476	1107	1054	2	1	1	95.94	71.955	0							2	2	495	879	1261	2	1	1	32.175	57.135	0
1	2	1767	1824	1640	2	1	1	114.855	118.56	0							1	2	1473	1476	998	2	1	1	95.745	95.94	0							2	2	546	945	1414	2	1	1	35.49	61.425	0
1	2	1914	1911	1919	2	1	1	124.41	124.215	0							1	2	1542	1533	1054	2	1	1	100.23	99.645	0							2	2	621	900	1268	2	1	1	40.365	58.5	0
1	2	1980	1764	1840	2	1	1	128.7	114.66	0							1	2	1434	1629	1022	2	1	1	93.21	105.885	0							2	2	474	1002	1446	2	1	1	30.81	65.13	0
1	2	1971	2001	2019	2	1	1	128.115	130.065	0							1	2	1149	1752	1099	2	1	1	74.685	113.88	0							2	2	573	1038	1277	2	1	1	37.245	67.47	0
1	2	1626	1719	1701	2	1	1	105.69	111.735	0							1	2	1494	1896	1016	2	1	1	97.11	123.24	0							2	2	489	1128	1364	2	1	1	31.785	73.32	0
1	2	1707	1638	1943	2	1	1	110.955	106.47	0							1	2	1569	1857	1260	2	1	1	101.985	120.705	0							2	2	333	1158	1296	2	1	1	21.645	75.27	0
1	2	1890	1701	1647	2	1	1	122.85	110.565	0							1	2	1539	1977	1078	2	1	1	100.035	128.505	0							2	2	99	1185	1470	2	1	1	6.435	77.025	0
1	2	1338	1293	1569	2	1	1	86.97	84.045	0							1	2	1755	1983	1173	2	1	1	114.075	128.895	0							2	2	99	1260	1339	2	1	1	6.435	81.9	0
1	2	1341	1224	1685	2	1	1	87.165	79.56	0							1	2	1827	1902	1193	2	1	1	118.755	123.63	0							2	2	111	1332	1432	2	1	1	7.215	86.58	0
1	2	1413	1287	1572	2	1	1	91.845	83.655	0							1	2	1956	1812	1115	2	1	1	127.14	117.78	0							2	2	84	1437	1352	2	1	1	5.46	93.405	0
1	2	1530	1467	1668	2	1	1	99.45	95.355	0							1	2	2019	1860	1125	2	1	1	131.235	120.9	0							2	2	195	1398	1640	2	1	1	12.675	90.87	0
1	2	1650	1515	1697	2	1	1	107.25	98.475	0							1	2	1797	1719	1277	2	1	1	116.805	111.735	0							2	2	42	1515	1352	2	1	1	2.73	98.475	0
1	2	1746	1422	1507	2	1	1	113.49	92.43	0							1	2	1620	1701	952	2	1	1	105.3	110.565	0							2	2	297	1494	1351	2	1	1	19.305	97.11	0
1	2	1500	1260	1494	2	1	1	97.5	81.9	0							1	2	1620	1776	1117	2	1	1	105.3	115.44	0							2	2	210	1821	1440	2	1	1	13.65	118.365	0
1	2	1509	1182	1674	2	1	1	98.085	76.83	0							1	2	1650	1626	1511	2	1	1	107.25	105.69	0							2	2	132	1791	1325	2	1	1	8.58	116.415	0
1	2	1752	1056	1917	2	1	1	113.88	68.64	0							1	2	1944	1704	1050	2	1	1	126.36	110.76	0							2	2	510	1770	1376	2	1	1	33.15	115.05	0
1	2	1914	969	1903	2	1	1	124.41	62.985	0							1	2	1941	1425	1093	2	1	1	126.165	92.625	0							2	2	366	1827	1348	2	1	1	23.79	118.755	0
1	2	1914	1062	1907	2	1	1	124.41	69.03	0							1	2	1890	1338	1260	2	1	1	122.85	86.97	0							2	2	531	1920	1293	2	1	1	34.515	124.8	0
1	2	1866	1197	2048	2	1	1	121.29	77.805	0							1	2	2010	1257	1124	2	1	1	130.65	81.705	0							2	2	483	1866	1652	2	1	1	31.395	121.29	0
1	2	1785	804	1805	2	1	1	116.025	52.26	0							1	2	1548	1449	1050	2	1	1	100.62	94.185	0							2	2	729	1902	1408	2	1	1	47.385	123.63	0
1	2	1848	825	1623	2	1	1	120.12	53.625	0							1	2	1995	999	1223	2	1	1	129.675	64.935	0							2	2	747	1944	1340	2	1	1	48.555	126.36	0
1	2	1674	822	1760	2	1	1	108.81	53.43	0							1	2	1761	1131	1059	2	1	1	114.465	73.515	0							2	2	759	1848	1432	2	1	1	49.335	120.12	0
1	2	1539	909	1715	2	1	1	100.035	59.085	0							1	2	1632	798	1233	2	1	1	106.08	51.87	0							2	2	816	1920	1548	2	1	1	53.04	124.8	0
1	2	1599	747	1727	2	1	1	103.935	48.555	0							1	2	1638	747	1226	2	1	1	106.47	48.555	0							2	2	837	1839	1354	2	1	1	54.405	119.535	0
1	2	1434	657	1701	2	1	1	93.21	42.705	0							1	2	1755	630	1094	2	1	1	114.075	40.95	0							2	2	810	1974	1286	2	1	1	52.65	128.31	0
1	2	1374	822	1640	2	1	1	89.31	53.43	0							1	2	1755	522	1141	2	1	1	114.075	33.93	0							2	2	705	1800	1534	2	1	1	45.825	117	0
1	2	1416	375	1666	2	1	1	92.04	24.375	0							1	2	1689	489	969	2	1	1	109.785	31.785	0							2	2	762	1686	1539	2	1	1	49.53	109.59	0
1	2	1929	657	1626	2	1	1	125.385	42.705	0							1	2	1827	402	1253	2	1	1	118.755	26.13	0							2	2	705	1638	1298	2	1	1	45.825	106.47	0
1	2	1917	591	1646	2	1	1	124.605	38.415	0							1	2	1581	240	1113	2	1	1	102.765	15.6	0							2	2	669	1518	1407	2	1	1	43.485	98.67	0
1	2	1848	636	1883	2	1	1	120.12	41.34	0							1	2	1833	708	1112	2	1	1	119.145	46.02	0							2	2	750	1521	1306	2	1	1	48.75	98.865	0
1	2	1569	807	1785	2	1	1	101.985	52.455	0							1	2	1605	702	1206	2	1	1	104.325	45.63	0							2	2	804	1620	1424	2	1	1	52.26	105.3	0
1	2	1728	876	1594	2	1	1	112.32	56.94	0							1	2	1659	651	1144	2	1	1	107.835	42.315	0							2	2	834	1737	1226	2	1	1	54.21	112.905	0
1	2	2001	288	1905	2	1	1	130.065	18.72	0							1	2	1704	561	1188	2	1	1	110.76	36.465	0							2	2	930	1734	1234	2	1	1	60.45	112.71	0
1	2	1944	360	1558	2	1	1	126.36	23.4	0							1	2	189	1863	1269	2	1	1	12.285	121.095	0							2	2	921	1635	1411	2	1	1	59.865	106.275	0
1	2	1869	312	1605	2	1	1	121.485	20.28	0							2	2	309	105	1120	2	1	1	20.085	6.825	0							2	2	864	1500	1325	2	1	1	56.16	97.5	0
1	2	1473	123	1808	2	1	1	95.745	7.995	0							2	2	276	141	1166	2	1	1	17.94	9.165	0							2	2	984	1857	1331	2	1	1	63.96	120.705	0
1	2	1257	117	1746	2	1	1	81.705	7.605	0							2	2	477	204	1067	2	1	1	31.005	13.26	0							2	2	1095	1878	1294	2	1	1	71.175	122.07	0
1	2	1185	108	1709	2	1	1	77.025	7.02	0							2	2	99	438	1076	2	1	1	6.435	28.47	0							2	2	1146	1842	1280	2	1	1	74.49	119.73	0
1	2	1359	69	1619	2	1	1	88.335	4.485	0							2	2	267	474	1254	2	1	1	17.355	30.81	0							2	2	1092	1998	1367	2	1	1	70.98	129.87	0
1	2	1629	156	1542	2	1	1	105.885	10.14	0							2	2	426	522	1168	2	1	1	27.69	33.93	0							2	2	1230	1926	1576	2	1	1	79.95	125.19	0
1	2	1749	168	1673	2	1	1	113.685	10.92	0							2	2	426	687	1008	2	1	1	27.69	44.655	0							2	2	1245	1758	1350	2	1	1	80.925	114.27	0
1	2	1707	222	1772	2	1	1	110.955	14.43	0							2	2	375	717	998	2	1	1	24.375	46.605	0							2	2	1308	1773	1304	2	1	1	85.02	115.245	0
1	2	1854	84	1593	2	1	1	120.51	5.46	0							2	2	453	924	1181	2	1	1	29.445	60.06	0							2	2	1389	1800	1331	2	1	1	90.285	117	0
1	2	1917	90	1761	2	1	1	124.605	5.85	0							2	2	66	921	1067	2	1	1	4.29	59.865	0							2	2	1560	1932	1471	2	1	1	101.4	125.58	0
1	2	1992	183	1977	2	1	1	129.48	11.895	0							2	2	30	1233	958	2	1	1	1.95	80.145	0							2	2	1500	2016	1540	2	1	1	97.5	131.04	0
1	2	2010	102	1741	2	1	1	130.65	6.63	0							2	2	258	1152	1359	2	1	1	16.77	74.88	0							2	2	1563	2007	1316	2	1	1	101.595	130.455	0
1	2	1926	177	1620	2	1	1	125.19	11.505	0							2	2	234	1110	1014	2	1	1	15.21	72.15	0							2	2	1701	1845	1457	2	1	1	110.565	119.925	0
1	2	1809	54	1615	2	1	1	117.585	3.51	0							2	2	486	1095	1195	2	1	1	31.59	71.175	0							2	2	1707	1761	1444	2	1	1	110.955	114.465	0
1	2	1884	480	1855	2	1	1	122.46	31.2	0							2	2	492	1938	1043	2	1	1	31.98	125.97	0							2	2	1989	1872	1230	2	1	1	129.285	121.68	0
1	2	1830	540	1696	2	1	1	118.95	35.1	0							2	2	426	1962	981	2	1	1	27.69	127.53	0							2	2	1914	1905	1566	2	1	1	124.41	123.825	0
1	2	1743	519	1761	2	1	1	113.295	33.735	0							2	2	369	1899	990	2	1	1	23.985	123.435	0							2	2	1794	1527	1447	2	1	1	116.61	99.255	0
1	2	1482	441	1774	2	1	1	96.33	28.665	0							2	2	480	1788	1031	2	1	1	31.2	116.22	0							2	2	1833	1599	1457	2	1	1	119.145	103.935	0
1	2	1569	471	1948	2	1	1	101.985	30.615	0							2	2	600	1758	1115	2	1	1	39	114.27	0							2	2	1848	1695	1404	2	1	1	120.12	110.175	0
1	2	1620	231	1666	2	1	1	105.3	15.015	0							2	2	612	1677	1107	2	1	1	39.78	109.005	0							2	2	1953	1317	1420	2	1	1	126.945	85.605	0
1	2	1551	75	1703	2	1	1	100.815	4.875	0							2	2	477	1530	1027	2	1	1	31.005	99.45	0							2	2	1815	1185	1253	2	1	1	117.975	77.025	0
1	2	1254	495	1839	2	1	1	81.51	32.175	0							2	2	591	1368	1127	2	1	1	38.415	88.92	0							2	2	1872	1116	1237	2	1	1	121.68	72.54	0
1	2	1659	1032	2077	2	1	1	107.835	67.08	0							2	2	564	1329	976	2	1	1	36.66	86.385	0							2	2	1764	1125	1325	2	1	1	114.66	73.125	0
1	2	1632	1098	1898	2	1	1	106.08	71.37	0							2	2	558	900	1111	2	1	1	36.27	58.5	0							2	2	2004	870	1443	2	1	1	130.26	56.55	0
1	2	1500	1038	1823	2	1	1	97.5	67.47	0							2	2	1005	48	1148	2	1	1	65.325	3.12	0							2	2	1944	822	1202	2	1	1	126.36	53.43	0
1	2	1371	1470	1728	2	1	1	89.115	95.55	0							2	2	804	69	1060	2	1	1	52.26	4.485	0							2	2	1809	843	1408	2	1	1	117.585	54.795	0
1	2	141	1767	1605	2	1	1	9.165	114.855	0							2	2	951	387	1209	2	1	1	61.815	25.155	0							2	2	1644	747	1530	2	1	1	106.86	48.555	0
1	2	738	1455	1552	2	1	1	47.97	94.575	0							2	2	1011	429	1483	2	1	1	65.715	27.885	0							2	2	1716	723	1409	2	1	1	111.54	46.995	0
1	2	672	1356	1632	2	1	1	43.68	88.14	0							2	2	876	426	1035	2	1	1	56.94	27.69	0							2	2	1398	828	1268	2	1	1	90.87	53.82	0
1	2	1389	432	1508	2	1	1	90.285	28.08	0							2	2	915	486	1142	2	1	1	59.475	31.59	0							2	2	1290	738	1330	2	1	1	83.85	47.97	0
1	2	1584	627	1765	2	1	1	102.96	40.755	0							2	2	966	486	1177	2	1	1	62.79	31.59	0							2	2	1200	729	1369	2	1	1	78	47.385	0
1	2	1650	672	1689	2	1	1	107.25	43.68	0							2	2	864	522	1132	2	1	1	56.16	33.93	0							2	2	1218	825	1453	2	1	1	79.17	53.625	0
1	2	1776	642	1731	2	1	1	115.44	41.73	0							2	2	639	489	1149	2	1	1	41.535	31.785	0							2	2	1065	663	1577	2	1	1	69.225	43.095	0
1	2	1776	714	1535	2	1	1	115.44	46.41	0							2	2	600	444	1135	2	1	1	39	28.86	0							2	2	966	699	1306	2	1	1	62.79	45.435	0
1	2	1833	741	1637	2	1	1	119.145	48.165	0							2	2	573	516	977	2	1	1	37.245	33.54	0							2	2	816	708	1291	2	1	1	53.04	46.02	0
1	2	1896	771	1788	2	1	1	123.24	50.115	0							2	2	660	765	971	2	1	1	42.9	49.725	0							2	2	828	522	1533	2	1	1	53.82	33.93	0
1	2	1992	759	1564	2	1	1	129.48	49.335	0							2	2	711	654	977	2	1	1	46.215	42.51	0							2	2	921	486	1574	2	1	1	59.865	31.59	0
1	2	1788	954	1755	2	1	1	116.22	62.01	0							2	2	1017	798	1127	2	1	1	66.105	51.87	0							2	2	843	429	1339	2	1	1	54.795	27.885	0
2	2	426	30	1915	2	1	1	27.69	1.95	0							2	2	816	897	1254	2	1	1	53.04	58.305	0							2	2	786	417	1327	2	1	1	51.09	27.105	0
2	2	504	96	1728	2	1	1	32.76	6.24	0							2	2	918	960	1112	2	1	1	59.67	62.4	0							2	2	720	450	1392	2	1	1	46.8	29.25	0
2	2	510	18	1725	2	1	1	33.15	1.17	0							2	2	795	978	1011	2	1	1	51.675	63.57	0							2	2	729	372	1569	2	1	1	47.385	24.18	0
2	2	516	183	1739	2	1	1	33.54	11.895	0							2	2	711	1179	1266	2	1	1	46.215	76.635	0							2	2	795	300	1407	2	1	1	51.675	19.5	0
2	2	192	285	1596	2	1	1	12.48	18.525	0							2	2	840	1326	1111	2	1	1	54.6	86.19	0							2	2	777	207	1391	2	1	1	50.505	13.455	0
2	2	144	330	1587	2	1	1	9.36	21.45	0							2	2	774	1347	1390	2	1	1	50.31	87.555	0							2	2	708	213	1393	2	1	1	46.02	13.845	0
2	2	69	348	1598	2	1	1	4.485	22.62	0							2	2	744	1242	1021	2	1	1	48.36	80.73	0							2	2	645	192	1385	2	1	1	41.925	12.48	0
2	2	48	405	1512	2	1	1	3.12	26.325	0							2	2	633	1059	1084	2	1	1	41.145	68.835	0							2	2	618	117	1346	2	1	1	40.17	7.605	0
2	2	144	414	1691	2	1	1	9.36	26.91	0							2	2	648	963	1005	2	1	1	42.12	62.595	0							2	2	552	51	1410	2	1	1	35.88	3.315	0
2	2	219	390	2188	2	1	1	14.235	25.35	0							2	2	951	1320	1217	2	1	1	61.815	85.8	0							2	2	849	165	1521	2	1	1	55.185	10.725	0
2	2	297	336	1893	2	1	1	19.305	21.84	0							2	2	1005	1437	1058	2	1	1	65.325	93.405	0							2	2	924	153	1341	2	1	1	60.06	9.945	0
2	2	804	276	1675	2	1	1	52.26	17.94	0							2	2	1062	1458	1159	2	1	1	69.03	94.77	0							2	2	987	84	1314	2	1	1	64.155	5.46	0
2	2	687	375	1801	2	1	1	44.655	24.375	0							2	2	936	1473	1085	2	1	1	60.84	95.745	0							2	2	1404	171	1278	2	1	1	91.26	11.115	0
2	2	597	426	1601	2	1	1	38.805	27.69	0							2	2	900	1512	1132	2	1	1	58.5	98.28	0							2	2	1473	117	1378	2	1	1	95.745	7.605	0
2	2	477	393	1715	2	1	1	31.005	25.545	0							2	2	732	1569	1042	2	1	1	47.58	101.985	0							2	2	1539	90	1440	2	1	1	100.035	5.85	0
2	2	714	555	1717	2	1	1	46.41	36.075	0							2	2	774	1647	957	2	1	1	50.31	107.055	0							2	2	1542	60	1397	2	1	1	100.23	3.9	0
2	2	246	534	1494	2	1	1	15.99	34.71	0							2	2	792	1725	1022	2	1	1	51.48	112.125	0							2	2	1620	123	1561	2	1	1	105.3	7.995	0
2	2	153	513	1743	2	1	1	9.945	33.345	0							2	2	954	1941	1082	2	1	1	62.01	126.165	0							2	2	1632	186	1374	2	1	1	106.08	12.09	0
2	2	339	648	1760	2	1	1	22.035	42.12	0							2	2	999	1968	1169	2	1	1	64.935	127.92	0							2	2	1638	255	1463	2	1	1	106.47	16.575	0
2	2	399	711	1502	2	1	1	25.935	46.215	0							2	2	1074	1932	1011	2	1	1	69.81	125.58	0							2	2	1584	357	1422	2	1	1	102.96	23.205	0
2	2	132	954	1734	2	1	1	8.58	62.01	0							2	2	1065	1866	1175	2	1	1	69.225	121.29	0							2	2	1554	411	1376	2	1	1	101.01	26.715	0
2	2	102	1014	2104	2	1	1	6.63	65.91	0							2	2	1281	993	1072	2	1	1	83.265	64.545	0							2	2	1638	423	1381	2	1	1	106.47	27.495	0
2	2	177	900	1813	2	1	1	11.505	58.5	0							2	2	1347	1110	1131	2	1	1	87.555	72.15	0							2	2	1953	60	1319	2	1	1	126.945	3.9	0
2	2	240	930	1651	2	1	1	15.6	60.45	0							2	2	1263	1059	1233	2	1	1	82.095	68.835	0							2	2	1971	234	1357	2	1	1	128.115	15.21	0
2	2	222	1023	1788	2	1	1	14.43	66.495	0							2	2	1221	1185	1104	2	1	1	79.365	77.025	0							2	2	1836	315	1466	2	1	1	119.34	20.475	0
2	2	288	996	1657	2	1	1	18.72	64.74	0							2	2	1284	1281	1107	2	1	1	83.46	83.265	0							2	2	1734	459	1379	2	1	1	112.71	29.835	0
2	2	324	897	1720	2	1	1	21.06	58.305	0							2	2	1110	1233	1502	2	1	1	72.15	80.145	0							2	2	1887	510	1423	2	1	1	122.655	33.15	0
2	2	420	915	1644	2	1	1	27.3	59.475	0							2	2	1065	1212	1035	2	1	1	69.225	78.78	0							2	2	1893	672	1423	2	1	1	123.045	43.68	0
2	2	369	834	1705	2	1	1	23.985	54.21	0							2	2	1032	1242	1065	2	1	1	67.08	80.73	0							2	2	1674	1110	1354	2	1	1	108.81	72.15	0
2	2	477	846	1580	2	1	1	31.005	54.99	0							2	2	1494	1311	1118	2	1	1	97.11	85.215	0							2	2	1596	1050	1291	2	1	1	103.74	68.25	0
2	2	504	861	1598	2	1	1	32.76	55.965	0							2	2	1401	1284	1368	2	1	1	91.065	83.46	0							2	2	1506	1077	1301	2	1	1	97.89	70.005	0
2	2	624	828	1781	2	1	1	40.56	53.82	0							2	2	1344	1665	1140	2	1	1	87.36	108.225	0							2	2	1551	1185	1260	2	1	1	100.815	77.025	0
2	2	645	759	1625	2	1	1	41.925	49.335	0							2	2	1326	1791	1013	2	1	1	86.19	116.415	0							2	2	1452	1209	1318	2	1	1	94.38	78.585	0
2	2	735	936	1597	2	1	1	47.775	60.84	0							2	2	1242	1746	973	2	1	1	80.73	113.49	0							2	2	1059	1068	1342	2	1	1	68.835	69.42	0
2	2	693	1014	2049	2	1	1	45.045	65.91	0							2	2	1299	1848	917	2	1	1	84.435	120.12	0							2	2	1098	1005	1284	2	1	1	71.37	65.325	0
2	2	462	1077	1690	2	1	1	30.03	70.005	0							2	2	1326	1980	1216	2	1	1	86.19	128.7	0							2	2	1143	930	1359	2	1	1	74.295	60.45	0
2	2	534	1107	1475	2	1	1	34.71	71.955	0							2	2	1284	1911	1002	2	1	1	83.46	124.215	0							2	2	996	780	1326	2	1	1	64.74	50.7	0
2	2	96	1227	1626	2	1	1	6.24	79.755	0							2	2	1281	2010	1087	2	1	1	83.265	130.65	0							2	2	1140	1260	1410	2	1	1	74.1	81.9	0
2	2	60	1380	1561	2	1	1	3.9	89.7	0							2	2	1110	1665	1151	2	1	1	72.15	108.225	0							2	2	1053	1218	1395	2	1	1	68.445	79.17	0
2	2	120	1473	1559	2	1	1	7.8	95.745	0							2	2	1509	1746	1078	2	1	1	98.085	113.49	0							2	2	972	1191	1282	2	1	1	63.18	77.415	0
2	2	435	1284	1795	2	1	1	28.275	83.46	0							2	2	1434	1788	1049	2	1	1	93.21	116.22	0							2	2	969	1269	1337	2	1	1	62.985	82.485	0
2	2	363	1290	1643	2	1	1	23.595	83.85	0							2	2	1527	1677	2236	2	1	1	99.255	109.005	0							2	2	840	1134	1335	2	1	1	54.6	73.71	0
2	2	354	1350	1575	2	1	1	23.01	87.75	0							2	2	1620	1572	1029	2	1	1	105.3	102.18	0							2	2	918	1326	1443	2	1	1	59.67	86.19	0
2	2	273	1323	1616	2	1	1	17.745	85.995	0							2	2	1719	1527	1035	2	1	1	111.735	99.255	0							2	2	849	1227	1388	2	1	1	55.185	79.755	0
2	2	324	1398	1857	2	1	1	21.06	90.87	0							2	2	1668	1929	1355	2	1	1	108.42	125.385	0							2	2	807	1275	1340	2	1	1	52.455	82.875	0
2	2	456	1470	1706	2	1	1	29.64	95.55	0							2	2	1647	1863	1103	2	1	1	107.055	121.095	0							2	2	741	1146	1279	2	1	1	48.165	74.49	0
2	2	327	1491	1737	2	1	1	21.255	96.915	0							2	2	1764	1857	1616	2	1	1	114.66	120.705	0							2	2	741	993	1613	2	1	1	48.165	64.545	0
2	2	246	1521	1549	2	1	1	15.99	98.865	0							2	2	1728	1719	989	2	1	1	112.32	111.735	0							2	2	1185	1383	1214	2	1	1	77.025	89.895	0
2	2	135	1545	1508	2	1	1	8.775	100.425	0							2	2	1872	1611	1036	2	1	1	121.68	104.715	0							2	2	1212	1464	1297	2	1	1	78.78	95.16	0
2	2	51	1566	1845	2	1	1	3.315	101.79	0							2	2	1830	1545	1029	2	1	1	118.95	100.425	0							2	2	1293	1332	1413	2	1	1	84.045	86.58	0
2	2	396	1635	1675	2	1	1	25.74	106.275	0							2	2	1941	1623	1291	2	1	1	126.165	105.495	0							2	2	1353	1392	1396	2	1	1	87.945	90.48	0
2	2	249	1656	1740	2	1	1	16.185	107.64	0							2	2	1956	1281	1378	2	1	1	127.14	83.265	0							2	2	1446	1560	1290	2	1	1	93.99	101.4	0
2	2	231	1611	1741	2	1	1	15.015	104.715	0							2	2	1854	1431	1051	2	1	1	120.51	93.015	0							2	2	1371	1602	1492	2	1	1	89.115	104.13	0
2	2	309	1716	1553	2	1	1	20.085	111.54	0							2	2	1713	1374	1042	2	1	1	111.345	89.31	0							2	2	1479	1578	1229	2	1	1	96.135	102.57	0
2	2	165	1824	1613	2	1	1	10.725	118.56	0							2	2	1629	1374	1100	2	1	1	105.885	89.31	0							2	2	1386	1695	1316	2	1	1	90.09	110.175	0
2	2	348	1827	1671	2	1	1	22.62	118.755	0							2	2	1554	1365	1120	2	1	1	101.01	88.725	0							2	2	1377	1968	1388	2	1	1	89.505	127.92	0
2	2	384	1863	1900	2	1	1	24.96	121.095	0							2	2	1635	1317	1030	2	1	1	106.275	85.605	0							2	2	1101	1548	1315	2	1	1	71.565	100.62	0
2	2	327	1974	1666	2	1	1	21.255	128.31	0							2	2	1638	1449	973	2	1	1	106.47	94.185	0							2	2	942	1509	1345	2	1	1	61.23	98.085	0
2	2	402	1920	1535	2	1	1	26.13	124.8	0							2	2	1887	1119	1049	2	1	1	122.655	72.735	0							2	2	942	1431	1516	2	1	1	61.23	93.015	0
2	2	438	1998	1513	2	1	1	28.47	129.87	0							2	2	1998	1113	1195	2	1	1	129.87	72.345	0							2	2	579	1665	1308	2	1	1	37.635	108.225	0
2	2	624	1974	1782	2	1	1	40.56	128.31	0							2	2	1899	975	1141	2	1	1	123.435	63.375	0							2	2	618	1602	1285	2	1	1	40.17	104.13	0
2	2	681	1935	1424	2	1	1	44.265	125.775	0							2	2	1665	216	1153	2	1	1	108.225	14.04	0							2	2	402	1644	1473	2	1	1	26.13	106.86	0
2	2	726	1986	1559	2	1	1	47.19	129.09	0							2	2	1518	873	1104	2	1	1	98.67	56.745	0							2	2	423	501	1453	2	1	1	27.495	32.565	0
2	2	741	1860	1498	2	1	1	48.165	120.9	0							2	2	1521	939	1193	2	1	1	98.865	61.035	0							2	2	504	513	1385	2	1	1	32.76	33.345	0
2	2	993	2025	1587	2	1	1	64.545	131.625	0							2	2	1410	957	1105	2	1	1	91.65	62.205	0							2	2	594	477	1298	2	1	1	38.61	31.005	0
2	2	936	1938	1686	2	1	1	60.84	125.97	0							2	2	1632	1029	1100	2	1	1	106.08	66.885	0							2	2	1290	267	1331	2	1	1	83.85	17.355	0
2	2	528	1557	1668	2	1	1	34.32	101.205	0							2	2	1806	1230	1344	2	1	1	117.39	79.95	0							2	2	1281	216	1259	2	1	1	83.265	14.04	0
2	2	612	1536	1529	2	1	1	39.78	99.84	0							2	2	1200	399	1050	2	1	1	78	25.935	0							2	2	1341	237	1321	2	1	1	87.165	15.405	0
2	2	615	1452	1582	2	1	1	39.975	94.38	0							2	2	774	414	1118	2	1	1	50.31	26.91	0							2	2	1173	441	1471	2	1	1	76.245	28.665	0
2	2	630	1341	1665	2	1	1	40.95	87.165	0							2	2	1758	906	1068	2	1	1	114.27	58.89	0							2	2	1104	405	1624	2	1	1	71.76	26.325	0
2	2	1077	2004	1719	2	1	1	70.005	130.26	0							2	2	1848	933	1094	2	1	1	120.12	60.645	0							2	2	939	264	1565	2	1	1	61.035	17.16	0
2	2	1056	1971	1528	2	1	1	68.64	128.115	0							2	2	1983	777	1211	2	1	1	128.895	50.505	0							2	2	1830	729	1358	2	1	1	118.95	47.385	0
2	2	1083	1833	1634	2	1	1	70.395	119.145	0							2	2	1983	678	1321	2	1	1	128.895	44.07	0							2	2	1632	1584	1366	2	1	1	106.08	102.96	0
2	2	954	1827	1565	2	1	1	62.01	118.755	0							2	2	1743	306	1116	2	1	1	113.295	19.89	0							2	2	1698	1674	1311	2	1	1	110.37	108.81	0
2	2	1032	1785	1646	2	1	1	67.08	116.025	0							2	2	1671	279	1206	2	1	1	108.615	18.135	0							2	2	1137	1662	1244	2	1	1	73.905	108.03	0
2	2	975	1704	1501	2	1	1	63.375	110.76	0							2	2	1602	306	1053	2	1	1	104.13	19.89	0							2	2	1188	1314	1414	2	1	1	77.22	85.41	0
2	2	999	1659	1538	2	1	1	64.935	107.835	0							2	2	1452	378	1128	2	1	1	94.38	24.57	0
2	2	918	1623	1627	2	1	1	59.67	105.495	0							2	2	1470	324	1058	2	1	1	95.55	21.06	0
2	2	972	1458	1650	2	1	1	63.18	94.77	0							2	2	1440	441	1128	2	1	1	93.6	28.665	0
2	2	924	1371	1527	2	1	1	60.06	89.115	0							2	2	1296	378	1004	2	1	1	84.24	24.57	0
2	2	765	1266	1550	2	1	1	49.725	82.29	0							2	2	1287	453	1040	2	1	1	83.655	29.445	0
2	2	822	1188	1956	2	1	1	53.43	77.22	0							2	2	1218	462	1130	2	1	1	79.17	30.03	0
2	2	807	744	1747	2	1	1	52.455	48.36	0							2	2	1317	507	1127	2	1	1	85.605	32.955	0
2	2	873	753	1670	2	1	1	56.745	48.945	0							2	2	1041	561	1186	2	1	1	67.665	36.465	0
2	2	933	696	1782	2	1	1	60.645	45.24	0							2	2	1125	582	1148	2	1	1	73.125	37.83	0
2	2	900	627	1779	2	1	1	58.5	40.755	0							2	2	1941	540	1101	2	1	1	126.165	35.1	0
2	2	924	576	1810	2	1	1	60.06	37.44	0							2	2	1869	525	1083	2	1	1	121.485	34.125	0
2	2	1002	561	1815	2	1	1	65.13	36.465	0							2	2	1911	411	1139	2	1	1	124.215	26.715	0
2	2	1023	96	1769	2	1	1	66.495	6.24	0							2	2	1878	192	1138	2	1	1	122.07	12.48	0
2	2	1056	192	1580	2	1	1	68.64	12.48	0							2	2	1800	195	1081	2	1	1	117	12.675	0
2	2	1113	240	1676	2	1	1	72.345	15.6	0							2	2	1506	60	1099	2	1	1	97.89	3.9	0
2	2	1101	624	1737	2	1	1	71.565	40.56	0							2	2	1374	57	1337	2	1	1	89.31	3.705	0
2	2	1224	645	1810	2	1	1	79.56	41.925	0							2	2	1074	240	1090	2	1	1	69.81	15.6	0
2	2	1140	744	1681	2	1	1	74.1	48.36	0							2	2	1263	1647	1095	2	1	1	82.095	107.055	0
2	2	1044	693	1918	2	1	1	67.86	45.045	0							2	2	1206	1542	1062	2	1	1	78.39	100.23	0
2	2	1053	801	1638	2	1	1	68.445	52.065	0							2	2	1242	1416	1104	2	1	1	80.73	92.04	0
2	2	1131	423	1706	2	1	1	73.515	27.495	0							2	2	1167	1458	1275	2	1	1	75.855	94.77	0
2	2	978	351	1664	2	1	1	63.57	22.815	0							2	2	993	1818	1055	2	1	1	64.545	118.17	0
2	2	894	378	1691	2	1	1	58.11	24.57	0							2	2	69	1461	1012	2	1	1	4.485	94.965	0
2	2	1083	945	1607	2	1	1	70.395	61.425	0							2	2	129	1485	1137	2	1	1	8.385	96.525	0
2	2	1179	990	1706	2	1	1	76.635	64.35	0							2	2	183	1461	1025	2	1	1	11.895	94.965	0
2	2	882	954	1546	2	1	1	57.33	62.01	0							2	2	96	1536	1202	2	1	1	6.24	99.84	0
2	2	972	1134	1794	2	1	1	63.18	73.71	0							2	2	177	1629	1151	2	1	1	11.505	105.885	0
2	2	1035	1161	1751	2	1	1	67.275	75.465	0							2	2	42	1779	1137	2	1	1	2.73	115.635	0
2	2	1110	1137	1657	2	1	1	72.15	73.905	0							2	2	72	1959	1438	2	1	1	4.68	127.335	0
2	2	1092	1302	1706	2	1	1	70.98	84.63	0							2	2	201	1959	1096	2	1	1	13.065	127.335	0
2	2	1083	1356	1635	2	1	1	70.395	88.14	0
2	2	1125	1413	1576	2	1	1	73.125	91.845	0
2	2	1230	1329	1609	2	1	1	79.95	86.385	0
2	2	1185	1536	1535	2	1	1	77.025	99.84	0
2	2	1140	1470	1692	2	1	1	74.1	95.55	0
2	2	1305	1545	1644	2	1	1	84.825	100.425	0
2	2	1233	1605	1639	2	1	1	80.145	104.325	0
2	2	1290	1653	1950	2	1	1	83.85	107.445	0
2	2	1146	1656	2044	2	1	1	74.49	107.64	0
2	2	1161	1749	1763	2	1	1	75.465	113.685	0
2	2	1239	1800	1522	2	1	1	80.535	117	0
2	2	1161	1959	1652	2	1	1	75.465	127.335	0
2	2	1296	1887	1709	2	1	1	84.24	122.655	0
2	2	1356	1962	1732	2	1	1	88.14	127.53	0
2	2	1284	1716	1851	2	1	1	83.46	111.54	0
2	2	1476	1917	1521	2	1	1	95.94	124.605	0
2	2	1548	1950	1581	2	1	1	100.62	126.75	0
2	2	1830	2013	1479	2	1	1	118.95	130.845	0
2	2	1836	1914	1831	2	1	1	119.34	124.41	0
2	2	2004	1842	1653	2	1	1	130.26	119.73	0
2	2	1515	1617	1758	2	1	1	98.475	105.105	0
2	2	1533	1551	1523	2	1	1	99.645	100.815	0
2	2	1425	1590	1494	2	1	1	92.625	103.35	0
2	2	1395	1644	1550	2	1	1	90.675	106.86	0
2	2	1422	1758	1616	2	1	1	92.43	114.27	0
2	2	1470	1803	1593	2	1	1	95.55	117.195	0
2	2	1344	1773	1785	2	1	1	87.36	115.245	0
2	2	1524	1716	1605	2	1	1	99.06	111.54	0
2	2	1713	1710	1674	2	1	1	111.345	111.15	0
2	2	1893	1587	1823	2	1	1	123.045	103.155	0
2	2	1986	1665	1680	2	1	1	129.09	108.225	0
2	2	1803	1611	1779	2	1	1	117.195	104.715	0
2	2	1725	1569	1688	2	1	1	112.125	101.985	0
2	2	1791	1527	1425	2	1	1	116.415	99.255	0
2	2	1830	1344	1751	2	1	1	118.95	87.36	0
2	2	1896	1407	1507	2	1	1	123.24	91.455	0
2	2	1968	1398	1794	2	1	1	127.92	90.87	0
2	2	2010	1323	1837	2	1	1	130.65	85.995	0
2	2	1722	1320	1685	2	1	1	111.93	85.8	0
2	2	1566	1383	1692	2	1	1	101.79	89.895	0
2	2	1497	1371	1640	2	1	1	97.305	89.115	0
2	2	1413	1353	1656	2	1	1	91.845	87.945	0
2	2	1608	1488	1693	2	1	1	104.52	96.72	0
2	2	1659	1449	1601	2	1	1	107.835	94.185	0
2	2	1782	231	1625	2	1	1	115.83	15.015	0
2	2	1854	378	1609	2	1	1	120.51	24.57	0
2	2	1773	384	1615	2	1	1	115.245	24.96	0
2	2	1782	435	2399	2	1	1	115.83	28.275	0
2	2	1620	411	1608	2	1	1	105.3	26.715	0
2	2	1590	345	1707	2	1	1	103.35	22.425	0
2	2	1512	351	1585	2	1	1	98.28	22.815	0
2	2	1449	303	1666	2	1	1	94.185	19.695	0
2	2	1551	246	1721	2	1	1	100.815	15.99	0
2	2	1533	186	1671	2	1	1	99.645	12.09	0
2	2	1485	225	1756	2	1	1	96.525	14.625	0
2	2	1404	216	1796	2	1	1	91.26	14.04	0
2	2	1350	171	1645	2	1	1	87.75	11.115	0
2	2	1332	258	1772	2	1	1	86.58	16.77	0
2	2	1227	549	1654	2	1	1	79.755	35.685	0
2	2	1401	594	1718	2	1	1	91.065	38.61	0
2	2	1386	717	1804	2	1	1	90.09	46.605	0
2	2	1467	735	1635	2	1	1	95.355	47.775	0
2	2	1470	813	1746	2	1	1	95.55	52.845	0
2	2	1365	897	1665	2	1	1	88.725	58.305	0
2	2	1254	927	1621	2	1	1	81.51	60.255	0
2	2	1143	864	1717	2	1	1	74.295	56.16	0
2	2	1620	891	1721	2	1	1	105.3	57.915	0
2	2	1623	966	1710	2	1	1	105.495	62.79	0
2	2	1884	1260	1608	2	1	1	122.46	81.9	0
2	2	1998	1149	1589	2	1	1	129.87	74.685	0
2	2	1506	1089	2097	2	1	1	97.89	70.785	0
2	2	1578	1152	1913	2	1	1	102.57	74.88	0
2	2	1449	1104	1735	2	1	1	94.185	71.76	0
2	2	1905	1761	2135	2	1	1	123.825	114.465	0
2	2	114	1701	1453	2	1	1	7.41	110.565	0
2	2	1698	609	1816	2	1	1	110.37	39.585	0
2	2	1629	516	1658	2	1	1	105.885	33.54	0
