# Supplementary material for: TUBA1A tubulinopathy mutants disrupt neuron morphogenesis and override XMAP215/Stu2 regulation of microtubule dynamics
Source: eLife. 2022 May 5;11:e76189. doi: 10.7554/eLife.76189 (PMC9236607; doi:10.7554/eLife.76189)
Supplement: Figure 5—source data 1. [file elife-76189-fig5-data1.xlsx]

## Sheet: WT (yJM3733)
	Label	Area	BX	BY	Width	Height	Min	Max	Max foci - max background
1	SUM_3733_100ms #.nd2:0001-0274-0277:1	182	270	268	14	13	2728	5648
2	SUM_3733_100ms #.nd2:0001-0274-0277:1	182	270	245	14	13	2603	4030	2618
3	SUM_3733_100ms #001.nd2:0001-0274-0277:1	182	380	378	14	13	3277	9269
4	SUM_3733_100ms #001.nd2:0001-0274-0277:1	182	380	362	14	13	3031	4780	4489
5	SUM_3733_100ms #004.nd2:0001-0274-0277:1	182	90	371	14	13	2762	6236
6	SUM_3733_100ms #004.nd2:0001-0274-0277:1	182	107	375	14	13	2855	5393	843
7	SUM_3733_100ms #004.nd2:0001-0274-0277:1	182	101	427	14	13	2396	4699
8	SUM_3733_100ms #004.nd2:0001-0274-0277:1	182	117	419	14	13	2457	3659	4040
9	SUM_3733_100ms #007.nd2:0001-0274-0277:1	182	125	244	14	13	2956	8555
10	SUM_3733_100ms #007.nd2:0001-0274-0277:1	182	118	277	14	13	2913	7082	2473
11	SUM_3733_100ms #007.nd2:0001-0274-0277:1	182	86	265	14	13	2982	8392
12	SUM_3733_100ms #007.nd2:0001-0274-0277:1	182	98	281	14	13	3664	6927	2465
13	SUM_3733_100ms #008.nd2:0001-0274-0277:1	182	165	338	14	13	2696	5714
14	SUM_3733_100ms #008.nd2:0001-0274-0277:1	182	184	353	14	13	2639	3818	2896
15	SUM_3733_100ms #009.nd2:0001-0274-0277:1	182	34	106	14	13	3291	7038
16	SUM_3733_100ms #009.nd2:0001-0274-0277:1	182	32	125	14	13	2842	4399	2639
17	SUM_3733_100ms #010.nd2:0001-0274-0277:1	182	409	200	14	13	3295	9348
18	SUM_3733_100ms #010.nd2:0001-0274-0277:1	182	422	199	14	13	2948	5803	3545
19	SUM_3733_100ms #011.nd2:0001-0274-0277:1	182	332	389	14	13	3054	7408
20	SUM_3733_100ms #011.nd2:0001-0274-0277:1	182	318	386	14	13	3037	4824	2584
21	SUM_3733_100ms #011.nd2:0001-0274-0277:1	182	73	317	14	13	2905	6610
22	SUM_3733_100ms #011.nd2:0001-0274-0277:1	182	85	308	14	13	3401	6025		585
23	SUM_3733_100ms #013.nd2:0001-0274-0277:1	182	151	66	14	13	3246	10705
24	SUM_3733_100ms #013.nd2:0001-0274-0277:1	182	160	79	14	13	3252	8871	2834
25	SUM_3733_100ms #014.nd2:0001-0274-0277:1	182	107	189	14	13	2761	5513
26	SUM_3733_100ms #014.nd2:0001-0274-0277:1	182	107	199	14	13	2650	4269	3244
27	SUM_3733_100ms #017.nd2:0001-0274-0277:1	182	132	340	14	13	3313	11326
28	SUM_3733_100ms #017.nd2:0001-0274-0277:1	182	126	352	14	13	2964	5124	6202
29	SUM_3733_100ms #020.nd2:0001-0274-0277:1	182	226	362	14	13	3090	6432
30	SUM_3733_100ms #020.nd2:0001-0274-0277:1	182	243	362	14	13	2964	5180	3252
Order: First one is max intensity of Stu2 foci- one directly below it is max intensity of background								Average:	3151.71

## Sheet: V410A (yJM4077)
	Label	Area	BX	BY	Width	Height	Min	Max
1	SUM_4077_100ms #.nd2:0001-0274-0277:1	182	128	84	14	13	4067	11823
2	SUM_4077_100ms #.nd2:0001-0274-0277:1	182	124	95	14	13	3748	10281	1542
3	SUM_4077_100ms #.nd2:0001-0274-0277:1	182	136	331	14	13	2707	5803
4	SUM_4077_100ms #.nd2:0001-0274-0277:1	182	123	331	14	13	2441	3711	2092
5	SUM_4077_100ms #002.nd2:0001-0274-0277:1	182	99	252	14	13	2412	4692
6	SUM_4077_100ms #002.nd2:0001-0274-0277:1	182	99	237	14	13	2355	3728	964
7	SUM_4077_100ms #007.nd2:0001-0274-0277:1	182	409	162	14	13	2383	5373
8	SUM_4077_100ms #007.nd2:0001-0274-0277:1	182	400	162	14	13	2383	3581	1792
9	SUM_4077_100ms #008.nd2:0001-0274-0277:1	182	191	179	14	13	2514	6634
10	SUM_4077_100ms #008.nd2:0001-0274-0277:1	182	204	168	14	13	2514	5713	921
11	SUM_4077_100ms #009.nd2:0001-0274-0277:1	182	406	280	14	13	2545	6737
12	SUM_4077_100ms #009.nd2:0001-0274-0277:1	182	395	266	14	13	2597	5106	1631
13	SUM_4077_100ms #009.nd2:0001-0274-0277:1	182	271	349	14	13	2217	5173
14	SUM_4077_100ms #009.nd2:0001-0274-0277:1	182	250	338	14	13	2752	5033		140
15	SUM_4077_100ms #010.nd2:0001-0274-0277:1	182	146	321	14	13	2980	7161
16	SUM_4077_100ms #010.nd2:0001-0274-0277:1	182	166	251	14	13	3520	5611	1550
17	SUM_4077_100ms #012.nd2:0001-0274-0277:1	182	150	332	14	13	2732	5537
18	SUM_4077_100ms #012.nd2:0001-0274-0277:1	182	140	345	14	13	2746	4735	802
19	SUM_4077_100ms #014.nd2:0001-0274-0277:1	182	278	148	14	13	2461	5238
20	SUM_4077_100ms #014.nd2:0001-0274-0277:1	182	278	157	14	13	2720	4072	1166
21	SUM_4077_100ms #016.nd2:0001-0274-0277:1	182	278	309	14	13	2673	4573
22	SUM_4077_100ms #016.nd2:0001-0274-0277:1	182	278	292	14	13	2682	3862	711
23	SUM_4077_100ms #020.nd2:0001-0274-0277:1	182	108	348	14	13	3079	6580
24	SUM_4077_100ms #020.nd2:0001-0274-0277:1	182	92	362	14	13	2807	4818	1762
Order: First one is max intensity of Stu2 foci- one directly below it is max intensity of background								Average:	1357.55

## Sheet: V410I (yJM4081)
	Label	Area	BX	BY	Width	Height	Min	Max
1	SUM_4081 #.nd2:0001-0274-0277:1	182	359	344	14	13	2432	6949
2	SUM_4081 #.nd2:0001-0274-0277:1	182	377	337	14	13	2703	4359	2590
3	SUM_4081 #.nd2:0001-0274-0277:1	182	33	493	14	13	2307	5197
4	SUM_4081 #.nd2:0001-0274-0277:1	182	18	493	14	13	2253	3382	1815
5	SUM_4081 #001.nd2:0001-0274-0277:1	182	274	232	14	13	2629	4929
6	SUM_4081 #001.nd2:0001-0274-0277:1	182	287	232	14	13	2396	3325	1604
7	SUM_4081 #001.nd2:0001-0274-0277:1	182	151	140	14	13	2312	5240
8	SUM_4081 #001.nd2:0001-0274-0277:1	182	141	140	14	13	2312	3683	1557
9	SUM_4081_100ms #003.nd2:0001-0274-0277:1	182	298	326	14	13	2979	6334
10	SUM_4081_100ms #003.nd2:0001-0274-0277:1	182	291	311	14	13	3129	4547	1787
11	SUM_4081_100ms #005.nd2:0001-0274-0277:1	182	140	157	14	13	2940	6075
12	SUM_4081_100ms #005.nd2:0001-0274-0277:1	182	140	175	14	13	2929	4510	1565
13	SUM_4081_100ms #006.nd2:0001-0274-0277:1	182	209	435	14	13	2455	5127
14	SUM_4081_100ms #006.nd2:0001-0274-0277:1	182	210	460	14	13	2420	3934	1193
15	SUM_4081_100ms #006.nd2:0001-0274-0277:1	182	223	449	14	13	2507	5488
16	SUM_4081_100ms #006.nd2:0001-0274-0277:1	182	218	459	14	13	2396	3611	1877
23	SUM_4081_100ms #017.nd2:0001-0274-0277:1	182	132	339	14	13	2794	6462
24	SUM_4081_100ms #017.nd2:0001-0274-0277:1	182	141	330	14	13	2783	4268	2194
25	SUM_4081_100ms #018.nd2:0001-0274-0277:1	182	139	387	14	13	2876	6832
26	SUM_4081_100ms #018.nd2:0001-0274-0277:1	182	143	377	14	13	3154	4913	1919
27	SUM_4081_100ms #019.nd2:0001-0274-0277:1	182	213	297	14	13	2756	6182
28	SUM_4081_100ms #019.nd2:0001-0274-0277:1	182	202	285	14	13	2378	4236	1946
Order: First one is max intensity of Stu2 foci- one directly below it is max intensity of background								Average:	1822.45

## Sheet: V410A (yJM4078)
	Label	Area	BX	BY	Width	Height	Min	Max
1	SUM_4078 #.nd2:0001-0157-0355:1	182	414	170	14	13	2494	5605
2	SUM_4078 #.nd2:0001-0157-0355:1	182	419	190	14	13	2909	5587		18
3	SUM_4078 #.nd2:0001-0157-0355:1	182	154	380	14	13	2339	6846
4	SUM_4078 #.nd2:0001-0157-0355:1	182	167	367	14	13	3032	5877	969
5	SUM_4078 #001.nd2:0001-0157-0355:1	182	110	395	14	13	2415	4958
6	SUM_4078 #001.nd2:0001-0157-0355:1	182	110	369	14	13	2433	3535	1423
7	SUM_4078 #002.nd2:0001-0157-0355:1	182	333	218	14	13	2405	5427
8	SUM_4078 #002.nd2:0001-0157-0355:1	182	320	206	14	13	3004	4774	653
9	SUM_4078 #003.nd2:0001-0157-0355:1	182	123	290	14	13	2927	6020
10	SUM_4078 #003.nd2:0001-0157-0355:1	182	130	273	14	13	2980	4660	1360
11	SUM_4078 #003.nd2:0001-0157-0355:1	182	168	302	14	13	2742	6976
12	SUM_4078 #003.nd2:0001-0157-0355:1	182	182	300	14	13	3038	5624	1352
13	SUM_4078 #005.nd2:0001-0157-0355:1	182	96	139	14	13	2951	8214
14	SUM_4078 #005.nd2:0001-0157-0355:1	182	112	133	14	13	3371	7848	366
15	SUM_4078 #006.nd2:0001-0157-0355:1	182	149	439	14	13	2665	6084
16	SUM_4078 #006.nd2:0001-0157-0355:1	182	161	398	14	13	2905	4479	1605
17	SUM_4078 #008.nd2:0001-0157-0355:1	182	353	417	14	13	2962	6962
18	SUM_4078 #008.nd2:0001-0157-0355:1	182	338	417	14	13	3362	5026	1936
19	SUM_4078 #011.nd2:0001-0157-0355:1	182	248	236	14	13	2823	5997
20	SUM_4078 #011.nd2:0001-0157-0355:1	182	260	244	14	13	2680	4300	1697
21	SUM_4078 #016.nd2:0001-0157-0355:1	182	329	283	14	13	2477	7517
22	SUM_4078 #016.nd2:0001-0157-0355:1	182	334	230	14	13	3186	5844	1673
23	SUM_4078 #018.nd2:0001-0157-0355:1	182	131	214	14	13	2401	6634
24	SUM_4078 #018.nd2:0001-0157-0355:1	182	112	202	14	13	3128	4712	1922
Order: First one is max intensity of Stu2 foci- one directly below it is max intensity of background								Average:	1359.64

## Sheet: WT (yJM3734)
	Label	Area	BX	BY	Width	Height	Min	Max
1	SUM_3734#002.nd2:0001-0157-0355:1	182	184	431	14	13	2434	6243
2	SUM_3734#002.nd2:0001-0157-0355:1	182	175	444	14	13	2474	4191	2052
3	SUM_3734#004.nd2:0001-0157-0355:1	182	152	446	14	13	2812	9403
4	SUM_3734#004.nd2:0001-0157-0355:1	182	120	429	14	13	3001	7117	2286
5	SUM_3734#007.nd2:0001-0157-0355:1	182	274	399	14	13	4386	10131
6	SUM_3734#007.nd2:0001-0157-0355:1	182	274	382	14	13	4710	6930	3201
7	SUM_3734#008.nd2:0001-0157-0355:1	182	49	178	14	13	2897	13882
8	SUM_3734#008.nd2:0001-0157-0355:1	182	63	176	14	13	4206	7979	5903
9	SUM_3734#009.nd2:0001-0157-0355:1	182	121	329	14	13	3102	6202
10	SUM_3734#009.nd2:0001-0157-0355:1	182	140	329	14	13	2989	4815	3387
11	SUM_3734#009.nd2:0001-0157-0355:1	182	390	417	14	13	3128	10798
12	SUM_3734#009.nd2:0001-0157-0355:1	182	367	364	14	13	3812	5591	5207
13	SUM_3734#010.nd2:0001-0157-0355:1	182	311	346	14	13	2549	8614
14	SUM_3734#010.nd2:0001-0157-0355:1	182	296	346	14	13	2663	5750	2864
15	SUM_3734#012.nd2:0001-0157-0355:1	182	373	167	14	13	3189	9774
16	SUM_3734#012.nd2:0001-0157-0355:1	182	329	148	14	13	4073	6678	3096
17	SUM_3734#014.nd2:0001-0157-0355:1	182	403	192	14	13	3009	13696
18	SUM_3734#014.nd2:0001-0157-0355:1	182	386	133	14	13	6546	11704	2992
19	SUM_3734#015.nd2:0001-0157-0355:1	182	403	406	14	13	3097	6898
20	SUM_3734#015.nd2:0001-0157-0355:1	182	403	427	14	13	2887	4931	2967
21	SUM_3734#018.nd2:0001-0157-0355:1	182	451	280	14	13	3811	11269
22	SUM_3734#018.nd2:0001-0157-0355:1	182	436	285	14	13	3305	8155	3114
23	SUM_3734#019.nd2:0001-0157-0355:1	182	63	374	14	13	2796	9439
24	SUM_3734#019.nd2:0001-0157-0355:1	182	56	319	14	13	3894	7807	2632
Order: First one is max intensity of Stu2 foci- one directly below it is max intensity of background								Average:	3308.42

## Sheet: V410I (yJM4082)
	Label	Area	BX	BY	Width	Height	Min	Max
1	SUM_4082 #.nd2:0001-0157-0355:1	182	251	233	14	13	2574	5571
2	SUM_4082 #.nd2:0001-0157-0355:1	182	241	243	14	13	2703	4223	1348
3	SUM_4082 #001.nd2:0001-0157-0355:1	182	129	83	14	13	2784	6556
4	SUM_4082 #001.nd2:0001-0157-0355:1	182	146	73	14	13	2936	4559	1997
5	SUM_4082 #002.nd2:0001-0157-0355:1	182	106	180	14	13	2753	6409
6	SUM_4082 #002.nd2:0001-0157-0355:1	182	120	177	14	13	2842	4498	1911
7	SUM_4082 #003.nd2:0001-0157-0355:1	182	336	453	14	13	2857	9921
8	SUM_4082 #003.nd2:0001-0157-0355:1	182	351	450	14	13	3270	8645	1276
9	SUM_4082 #005.nd2:0001-0157-0355:1	182	189	210	14	13	3493	10562
10	SUM_4082 #005.nd2:0001-0157-0355:1	182	177	200	14	13	4185	7635	2927
11	SUM_4082 #007.nd2:0001-0157-0355:1	182	159	407	14	13	2895	5895
12	SUM_4082 #007.nd2:0001-0157-0355:1	182	144	409	14	13	2907	4772	1123
13	SUM_4082 #010.nd2:0001-0157-0355:1	182	425	401	14	13	3093	10927
14	SUM_4082 #010.nd2:0001-0157-0355:1	182	433	416	14	13	3844	8827	2100
15	SUM_4082 #010.nd2:0001-0157-0355:1	182	282	255	14	13	2979	7730
16	SUM_4082 #010.nd2:0001-0157-0355:1	182	248	246	14	13	3001	4766	2964
17	SUM_4082 #011.nd2:0001-0157-0355:1	182	382	466	14	13	3204	7570
18	SUM_4082 #011.nd2:0001-0157-0355:1	182	352	463	14	13	3506	5367	2203
19	SUM_4082 #011.nd2:0001-0157-0355:1	182	57	374	14	13	3261	10411
20	SUM_4082 #011.nd2:0001-0157-0355:1	182	43	409	14	13	2745	8574	1837
21	SUM_4082 #012.nd2:0001-0157-0355:1	182	422	158	14	13	2641	5746
22	SUM_4082 #012.nd2:0001-0157-0355:1	182	406	158	14	13	2882	4604	1142
23	SUM_4082 #018.nd2:0001-0157-0355:1	182	171	380	14	13	2916	9589
24	SUM_4082 #018.nd2:0001-0157-0355:1	182	155	385	14	13	2854	7820	1769
25	SUM_4082 #019.nd2:0001-0157-0355:1	182	298	117	14	13	2503	7358
26	SUM_4082 #019.nd2:0001-0157-0355:1	182	284	104	14	13	2639	4373	2985
27	SUM_4082 #019.nd2:0001-0157-0355:1	182	60	204	14	13	2884	10270
28	SUM_4082 #019.nd2:0001-0250-0354:1	182	43	236	14	13	2842	8388	1882
29	SUM_4082 #020.nd2:0001-0157-0355:1	182	375	394	14	13	2820	11068
30	SUM_4082 #020.nd2:0001-0157-0355:1	182	405	375	14	13	4256	9969	1099
Order: First one is max intensity of Stu2 foci- one directly below it is max intensity of background								Average:	1904.2

## Sheet: WT (yJM3733) (2)
	Label	Area	BX	BY	Width	Height	Min	Max
1	SUM_3733 #.nd2:0001-0405-0105:1	182	78	410	14	13	2860	11047
2	SUM_3733 #.nd2:0001-0405-0105:1	182	91	415	14	13	3015	8190	2857
3	SUM_3733 #001.nd2:0001-0405-0105:1	182	50	281	14	13	3224	8502
4	SUM_3733 #001.nd2:0001-0405-0105:1	182	64	281	14	13	3989	7168	3334
5	SUM_3733 #002.nd2:0001-0405-0105:1	182	299	16	14	13	3050	9853
6	SUM_3733 #002.nd2:0001-0405-0105:1	182	312	29	14	13	2547	5398	4455
7	SUM_3733 #007.nd2:0001-0405-0105:1	182	59	245	14	13	3736	9218
8	SUM_3733 #007.nd2:0001-0405-0105:1	182	47	245	14	13	3546	5829	3389
9	SUM_3733 #007.nd2:0001-0405-0105:1	182	101	368	14	13	3001	11831
10	SUM_3733 #007.nd2:0001-0405-0105:1	182	107	427	14	13	4036	8054	3777
11	SUM_3733 #013.nd2:0001-0405-0105:1	182	244	258	14	13	2744	11278
12	SUM_3733 #013.nd2:0001-0405-0105:1	182	256	269	14	13	4104	8207	3071
13	SUM_3733 #015.nd2:0001-0405-0105:1	182	234	202	14	13	3129	8559
14	SUM_3733 #015.nd2:0001-0405-0105:1	182	216	202	14	13	3044	4991	3568
15	SUM_3733 #016.nd2:0001-0405-0105:1	182	148	273	14	13	2777	12280
16	SUM_3733 #016.nd2:0001-0405-0105:1	182	145	293	14	13	2848	8723	3557
17	SUM_3733 #016.nd2:0001-0405-0105:1	182	409	54	14	13	2745	6834
18	SUM_3733 #016.nd2:0001-0405-0105:1	182	419	54	14	13	2745	4385	2449
19	SUM_3733 #020.nd2:0001-0405-0105:1	182	104	107	14	13	2877	9642
20	SUM_3733 #020.nd2:0001-0405-0105:1	182	82	86	14	13	3091	5693	3949
21	SUM_3733 #020.nd2:0001-0405-0105:1	182	334	264	14	13	2650	7511
22	SUM_3733 #020.nd2:0001-0405-0105:1	182	389	257	14	13	3256	4895	2616
23	SUM_3733 #020.nd2:0001-0405-0105:1	182	383	367	14	13	3216	6315
24	SUM_3733 #020.nd2:0001-0405-0105:1	182	367	367	14	13	3198	5151	2164
25	SUM_3733 #020.nd2:0001-0405-0105:1	182	329	243	14	13	2785	6143
26	SUM_3733 #020.nd2:0001-0405-0105:1	182	317	252	14	13	2618	4242	1901
Order: First one is max intensity of Stu2 foci- one directly below it is max intensity of background								Average:	3160.54

## Sheet: V410A (yJM4077) (2)
	Label	Area	BX	BY	Width	Height	Min	Max
1	SUM_4077 #001.nd2:0001-0405-0105:1	182	345	387	14	13	3529	9838
2	SUM_4077 #001.nd2:0001-0405-0105:1	182	355	399	14	13	3329	8791	1047
3	SUM_4077 #002.nd2:0001-0405-0105:1	182	122	194	14	13	2401	5474
4	SUM_4077 #002.nd2:0001-0405-0105:1	182	120	181	14	13	2679	4059	1415
5	SUM_4077 #003.nd2:0001-0405-0105:1	182	285	282	14	13	2696	6471
6	SUM_4077 #003.nd2:0001-0405-0105:1	182	295	306	14	13	3049	4568	1903
7	SUM_4077 #004.nd2:0001-0405-0105:1	182	227	272	14	13	2373	4794
8	SUM_4077 #004.nd2:0001-0405-0105:1	182	239	272	14	13	2315	3088	1706
9	SUM_4077 #005.nd2:0001-0405-0105:1	182	202	116	14	13	3090	9959
10	SUM_4077 #005.nd2:0001-0405-0105:1	182	204	127	14	13	3271	8442	1517
11	SUM_4077 #005.nd2:0001-0405-0105:1	182	129	90	14	13	2510	5954
12	SUM_4077 #005.nd2:0001-0405-0105:1	182	144	90	14	13	2883	4441	1513
13	SUM_4077 #006.nd2:0001-0405-0105:1	182	61	319	14	13	2683	5520
14	SUM_4077 #006.nd2:0001-0405-0105:1	182	76	319	14	13	2870	4487	1033
15	SUM_4077 #007.nd2:0001-0405-0105:1	182	194	152	14	13	3080	9577
16	SUM_4077 #007.nd2:0001-0405-0105:1	182	207	158	14	13	3198	7505	2072
17	SUM_4077 #008.nd2:0001-0405-0105:1	182	413	395	14	13	2706	4236
18	SUM_4077 #008.nd2:0001-0405-0105:1	182	408	379	14	13	2238	3544	692
21	SUM_4077 #008.nd2:0001-0405-0105:1	182	219	285	14	13	3228	7180
22	SUM_4077 #009.nd2:0001-0405-0105:1	182	302	288	14	13	2748	5889	1291
23	SUM_4077 #011.nd2:0001-0405-0105:1	182	408	175	14	13	3331	14468
24	SUM_4077 #011.nd2:0001-0405-0105:1	182	406	190	14	13	4821	13884	584
25	SUM_4077 #011.nd2:0001-0405-0105:1	182	104	371	14	13	2443	5685
26	SUM_4077 #011.nd2:0001-0405-0105:1	182	108	383	14	13	2725	5057	628
27	SUM_4077 #012.nd2:0001-0405-0105:1	182	469	163	14	13	3305	8026
28	SUM_4077 #012.nd2:0001-0405-0105:1	182	481	134	14	13	3717	6074	1952
29	SUM_4077 #013.nd2:0001-0405-0105:1	182	296	90	14	13	2510	5886
30	SUM_4077 #013.nd2:0001-0405-0105:1	182	296	105	14	13	2886	4198	1688
31	SUM_4077 #014.nd2:0001-0405-0105:1	182	131	159	14	13	2993	7188
32	SUM_4077 #014.nd2:0001-0405-0105:1	182	124	149	14	13	3005	5860	1328
33	SUM_4077 #014.nd2:0001-0405-0105:1	182	349	455	14	13	2621	8421
34	SUM_4077 #014.nd2:0001-0405-0105:1	182	334	456	14	13	2834	6469	1952
35	SUM_4077 #016.nd2:0001-0405-0105:1	182	200	405	14	13	2599	4942
36	SUM_4077 #016.nd2:0001-0405-0105:1	182	191	421	14	13	2533	3872	1070
37	SUM_4077 #017.nd2:0001-0405-0105:1	182	181	329	14	13	2816	7267
38	SUM_4077 #017.nd2:0001-0405-0105:1	182	179	337	14	13	2450	5640	1627
39	SUM_4077 #017.nd2:0001-0405-0105:1	182	386	182	14	13	3289	6776
40	SUM_4077 #017.nd2:0001-0405-0105:1	182	388	170	14	13	3026	5774	1002
41	SUM_4077 #020.nd2:0001-0405-0105:1	182	221	157	14	13	2705	7374
42	SUM_4077 #020.nd2:0001-0405-0105:1	182	228	162	14	13	2608	5964	1410
Order: First one is max intensity of Stu2 foci- one directly below it is max intensity of background								Average:	1371.5

## Sheet: V410I (yJM4081) (2)
	Label	Area	BX	BY	Width	Height	Min	Max
1	SUM_4081 #.nd2:0001-0405-0105:1	182	99	401	14	13	2829	8296
2	SUM_4081 #.nd2:0001-0405-0105:1	182	57	401	14	13	3198	6884	1412
3	SUM_4081 #.nd2:0001-0405-0105:1	182	399	140	14	13	2421	6516
4	SUM_4081 #.nd2:0001-0405-0105:1	182	384	140	14	13	3292	5534	982
5	SUM_4081 #001.nd2:0001-0405-0105:1	182	363	175	14	13	3493	7718
6	SUM_4081 #001.nd2:0001-0405-0105:1	182	365	163	14	13	2764	5939	1779
7	SUM_4081 #001.nd2:0001-0405-0105:1	182	356	226	14	13	2576	6528
8	SUM_4081 #001.nd2:0001-0405-0105:1	182	356	236	14	13	3119	5081	1447
9	SUM_4081 #002.nd2:0001-0405-0105:1	182	138	119	14	13	3235	12862
10	SUM_4081 #002.nd2:0001-0405-0105:1	182	180	119	14	13	3934	9895	2967
11	SUM_4081 #003.nd2:0001-0405-0105:1	182	155	272	14	13	2537	6199
12	SUM_4081 #003.nd2:0001-0405-0105:1	182	148	292	14	13	3336	5075	1124
13	SUM_4081 #006.nd2:0001-0405-0105:1	182	192	86	14	13	2575	7241
14	SUM_4081 #006.nd2:0001-0405-0105:1	182	205	80	14	13	2374	5125	2116
15	SUM_4081 #007.nd2:0001-0405-0105:1	182	146	376	14	13	2884	7721
16	SUM_4081 #007.nd2:0001-0405-0105:1	182	155	373	14	13	2805	5435	2286
17	SUM_4081 #009.nd2:0001-0405-0105:1	182	469	174	14	13	2439	8118
18	SUM_4081 #009.nd2:0001-0405-0105:1	182	450	185	14	13	3099	6201	1917
19	SUM_4081 #013.nd2:0001-0405-0105:1	182	290	236	14	13	3204	8592
20	SUM_4081 #013.nd2:0001-0405-0105:1	182	284	260	14	13	2626	6508	2084
21	SUM_4081 #013.nd2:0001-0405-0105:1	182	60	376	14	13	3259	9735
22	SUM_4081 #013.nd2:0001-0405-0105:1	182	71	388	14	13	3997	7517	2218
23	SUM_4081 #016.nd2:0001-0405-0105:1	182	391	108	14	13	2628	6130
24	SUM_4081 #016.nd2:0001-0405-0105:1	182	391	118	14	13	2737	4353	1777
25	SUM_4081 #019.nd2:0001-0405-0105:1	182	280	397	14	13	3091	6515
26	SUM_4081 #019.nd2:0001-0405-0105:1	182	280	405	14	13	2968	4888	1627
27	SUM_4081 #020.nd2:0001-0405-0105:1	182	392	251	14	13	2772	7121
28	SUM_4081 #020.nd2:0001-0405-0105:1	182	389	259	14	13	2825	5337	1784
29	SUM_4081 #021.nd2:0001-0405-0105:1	182	143	261	14	13	2768	8228
30	SUM_4081 #021.nd2:0001-0405-0105:1	182	128	261	14	13	3279	6118	2110
Order: First one is max intensity of Stu2 foci- one directly below it is max intensity of background								Average:	1842
