# Supplementary material for: TUBA1A tubulinopathy mutants disrupt neuron morphogenesis and override XMAP215/Stu2 regulation of microtubule dynamics
Source: eLife. 2022 May 5;11:e76189. doi: 10.7554/eLife.76189 (PMC9236607; doi:10.7554/eLife.76189)
Supplement: Figure 5—source data 2. [file elife-76189-fig5-data2.xlsx]

## Sheet: V410A
032521_Unbound VA
Alpha Ab
	Label	Area	Mean	Min	Max	BX	BY	Width	Height	RawIntDen			GST-TOG1/2 (nM)	Proportion of unbound tubulin
1	032521_VA Sup.tif:0165-0178	0.086	12.144	0	69	1	0.987	0.38	0.227	23535			0	100	1
2	032521_VA Sup.tif:0165-0178	0.086	11.866	0	61	1.407	0.973	0.38	0.227	24098			0
3	032521_VA Sup.tif:0165-0178	0.086	10.081	0	68	1.813	0.973	0.38	0.227	24201			9.76562	102.83	1.0283
4	032521_VA Sup.tif:0165-0178	0.086	12.921	0	70	2.213	0.953	0.38	0.227	23534.9			19.5312	99.9997	0.999997
5	032521_VA Sup.tif:0165-0178	0.086	13.207	0	79	2.62	0.947	0.38	0.227	23393.1			39.0625	99.397	0.99397
6	032521_VA Sup.tif:0165-0178	0.086	14.546	0	85	3.007	0.947	0.38	0.227	23615			78.125	100.34	1.0034
7	032521_VA Sup.tif:0165-0178	0.086	11.84	0	75	3.4	0.947	0.38	0.227	23238.3			156.25	98.7394	0.987394
8	032521_VA Sup.tif:0165-0178	0.086	14.583	0	81	3.813	0.947	0.38	0.227	23037			312.5	97.8839	0.978839
9	032521_VA Sup.tif:0165-0178	0.086	12.488	0	64	4.207	0.947	0.38	0.227	22945			625	97.4931	0.974931
10	032521_VA Sup.tif:0165-0178	0.086	13.046	0	68	4.62	0.94	0.38	0.227	22997			1250	97.714	0.97714
11	032521_VA Sup.tif:0165-0178	0.086	13.471	0	68	5.007	0.94	0.38	0.227	21873.1			2500	92.9384	0.929384
12	032521_VA Sup.tif:0165-0178	0.086	12.847	0	69	5.413	0.947	0.38	0.227	20713.7			5000	88.0125	0.880125

## Sheet: V410I
032521_Unbound VI
Alpha Ab
	Label	Area	Mean	Min	Max	BX	BY	Width	Height	RawIntDen			GST-TOG1/2 (nM)	Proportion of unbound tubulin
1	032521_VI Sup.tif:0250-0164	0.081	17.225	0	68	0.887	1.573	0.42	0.193	31470			0	100	1
2	032521_VI Sup.tif:0250-0164	0.081	18.296	0	84	1.307	1.607	0.42	0.193	31176			0
3	032521_VI Sup.tif:0250-0164	0.081	14.381	1	58	1.707	1.613	0.42	0.193	31656			9.76562	100.591	1.00591
4	032521_VI Sup.tif:0250-0164	0.081	14.225	1	55	2.1	1.64	0.42	0.193	30950.4			19.5312	98.349	0.98349
5	032521_VI Sup.tif:0250-0164	0.081	18.41	1	73	2.513	1.66	0.42	0.193	31256.3			39.0625	99.3209	0.993209
6	032521_VI Sup.tif:0250-0164	0.081	18.291	0	73	2.933	1.673	0.42	0.193	30631			78.125	97.334	0.97334
7	032521_VI Sup.tif:0250-0164	0.081	15.714	0	63	3.34	1.693	0.42	0.193	30004.7			156.25	95.3439	0.953439
8	032521_VI Sup.tif:0250-0164	0.081	19.396	0	77	3.76	1.707	0.42	0.193	28709			312.5	91.2266	0.912266
9	032521_VI Sup.tif:0250-0164	0.081	17.327	0	77	4.187	1.707	0.42	0.193	27580			625	87.639	0.87639
10	032521_VI Sup.tif:0250-0164	0.081	14.519	0	68	4.58	1.72	0.42	0.193	26527			1250	84.293	0.84293
11	032521_VI Sup.tif:0250-0164	0.081	15.096	0	58	5.007	1.687	0.42	0.193	25959.3			2500	82.489	0.82489
12	032521_VI Sup.tif:0250-0164	0.081	17.064	0	67	5.433	1.693	0.42	0.193	23786.1			5000	75.5834	0.755834

## Sheet: WT
032521_Unbound WT
Alpha Ab
	Label	Area	Mean	Min	Max	BX	BY	Width	Height	RawIntDen			GST-TOG1/2 (nM)	Proportion of unbound tubulin
1	032521_WT Sup.tif:0185-0140	0.073	17.421	0	75	0.76	1.133	0.353	0.207	28622			0	100	1
2	032521_WT Sup.tif:0185-0140	0.073	15.987	0	78	1.12	1.133	0.353	0.207	28991			0
3	032521_WT Sup.tif:0185-0140	0.073	19.987	0	84	1.487	1.133	0.353	0.207	26267			9.76562	91.7721	0.917721
4	032521_WT Sup.tif:0185-0140	0.073	15.802	0	73	1.833	1.133	0.353	0.207	25963			19.5312	90.7099	0.907099
5	032521_WT Sup.tif:0185-0140	0.073	14.443	0	61	2.187	1.133	0.353	0.207	23730			39.0625	82.9082	0.829082
6	032521_WT Sup.tif:0185-0140	0.073	7.727	0	52	3.267	1.133	0.353	0.207	19437			78.125	67.9093	0.679093
7	032521_WT Sup.tif:0185-0140	0.073	2.232	0	12	3.627	1.133	0.353	0.207	14632			156.25	51.1215	0.511215
8	032521_WT Sup.tif:0185-0140	0.073	3.8	0	21	4.013	1.18	0.353	0.207	12695			312.5	44.354	0.44354
9	032521_WT Sup.tif:0185-0140	0.073	4.38	0	37	4.38	1.18	0.353	0.207	7196			625	25.1415	0.251415
10	032521_WT Sup.tif:0185-0140	0.073	8.906	0	45	4.74	1.18	0.353	0.207	6243			1250	21.8119	0.218119
11	032521_WT Sup.tif:0185-0140	0.073	11.83	0	52	5.08	1.18	0.353	0.207	3667			2500	12.8118	0.128118
12	032521_WT Sup.tif:0185-0140	0.073	14.666	0	54	5.44	1.18	0.353	0.207	1859.25			5000	6.49589	0.0649589

## Sheet: WT (2)
033121_Unbound WT
Alpha Ab
	Label	Area	Mean	Min	Max	BX	BY	Width	Height	RawIntDen			GST-TOG1/2 (nM)	Proportion of unbound tubulin
1	033121_WT Sup.tif:0181-0281	0.07	16.227	0	73	1.287	1.133	0.387	0.18	25411			0	100	1
2	033121_WT Sup.tif:0181-0281	0.07	12.893	0	49	1.68	1.12	0.387	0.18	25576			0
3	033121_WT Sup.tif:0181-0281	0.07	11.199	0	48	2.087	1.12	0.387	0.18	22793.7			9.76562	89.7	0.897
4	033121_WT Sup.tif:0181-0281	0.07	11.956	0	56	2.493	1.12	0.387	0.18	23098.6			19.5312	90.9	0.909
5	033121_WT Sup.tif:0181-0281	0.07	13.383	0	60	2.887	1.12	0.387	0.18	19871.4			39.0625	78.2	0.782
6	033121_WT Sup.tif:0181-0281	0.07	14.6	0	70	3.273	1.127	0.387	0.18	18018.8			78.125	70.9093	0.709093
7	033121_WT Sup.tif:0181-0281	0.07	12.951	0	66	3.667	1.14	0.387	0.18	12298.9			156.25	48.4	0.484
8	033121_WT Sup.tif:0181-0281	0.07	17.955	0	77	4.06	1.14	0.387	0.18	10240.6			312.5	40.3	0.403
9	033121_WT Sup.tif:0181-0281	0.07	13.898	0	58	4.467	1.153	0.387	0.18	6327.34			625	24.9	0.249
10	033121_WT Sup.tif:0181-0281	0.07	13.647	0	66	4.873	1.153	0.387	0.18	5971.59			1250	23.5	0.235
11	033121_WT Sup.tif:0181-0281	0.07	12.058	0	67	5.26	1.153	0.387	0.18	1931.24			2500	7.6	0.076
12	033121_WT Sup.tif:0181-0281	0.07	13.778	0	65	5.66	1.153	0.387	0.18	1067.26			5000	4.2	0.042

## Sheet: V410I (2)
033121_Unbound V410I
Alpha Ab
	Label	Area	Mean	Min	Max	BX	BY	Width	Height	RawIntDen			GST-TOG1/2 (nM)	Proportion of unbound tubulin
1	033121_VI Sup.tif:0156-0130	0.07	15.987	0	85	0.3	0.96	0.36	0.193	25035			0	100	1
2	033121_VI Sup.tif:0156-0130	0.07	8.646	0	48	0.687	0.96	0.36	0.193	25070			0
3	033121_VI Sup.tif:0156-0130	0.07	6.482	0	41	1.1	0.953	0.36	0.193	24359.1			9.76562	97.3	0.973
4	033121_VI Sup.tif:0156-0130	0.07	7.203	0	38	1.5	0.933	0.36	0.193	23883.4			19.5312	95.4	0.954
5	033121_VI Sup.tif:0156-0130	0.07	8.513	0	42	1.913	0.913	0.36	0.193	23758.2			39.0625	94.9	0.949
6	033121_VI Sup.tif:0156-0130	0.07	8.975	0	51	2.307	0.913	0.36	0.193	23382.7			78.125	93.4	0.934
7	033121_VI Sup.tif:0156-0130	0.07	9.599	0	58	3.46	0.9	0.36	0.193	23983.5			156.25	95.8	0.958
8	033121_VI Sup.tif:0156-0130	0.07	9.885	0	49	3.82	0.887	0.36	0.193	23332.6			312.5	93.2	0.932
9	033121_VI Sup.tif:0156-0130	0.07	12.012	0	64	4.227	0.887	0.36	0.193	21430			625	85.6	0.856
10	033121_VI Sup.tif:0156-0130	0.07	14.055	0	62	4.613	0.887	0.36	0.193	20453.6			1250	81.7	0.817
11	033121_VI Sup.tif:0156-0130	0.07	14.65	0	68	5.013	0.887	0.36	0.193	19627.4			2500	78.4	0.784
12	033121_VI Sup.tif:0156-0130	0.07	17.925	0	78	5.42	0.887	0.36	0.193	17599.6			5000	70.3	0.703

## Sheet: V410A (2)
033121_Unbound V410A
Alpha Ab
	Label	Area	Mean	Min	Max	BX	BY	Width	Height	RawIntDen			GST-TOG1/2 (nM)	Proportion of unbound tubulin
1	033121_VA Sup.tif:0230-0243	0.089	17.611	0	66	0.493	1.447	0.393	0.227	35327			0	100	1
2	033121_VA Sup.tif:0230-0243	0.089	12.277	0	62	0.967	1.433	0.393	0.227	34628			0
3	033121_VA Sup.tif:0230-0243	0.089	12.942	0	72	1.433	1.427	0.393	0.227	35079.7			9.76562	99.3	0.993
4	033121_VA Sup.tif:0230-0243	0.089	10.129	0	54	1.887	1.413	0.393	0.227	35256.3			19.5312	99.8	0.998
5	033121_VA Sup.tif:0230-0243	0.089	11.866	0	66	2.353	1.4	0.393	0.227	34373.2			39.0625	97.3	0.973
6	033121_VA Sup.tif:0230-0243	0.089	10.394	0	60	2.8	1.387	0.393	0.227	34761.8			78.125	98.4	0.984
7	033121_VA Sup.tif:0230-0243	0.089	14.186	0	74	3.26	1.353	0.393	0.227	33772.6			156.25	95.6	0.956
8	033121_VA Sup.tif:0230-0243	0.089	14.715	0	81	3.707	1.347	0.393	0.227	34019.9			312.5	96.3	0.963
9	033121_VA Sup.tif:0230-0243	0.089	19.997	0	85	4.147	1.32	0.393	0.227	32253.6			625	91.3	0.913
10	033121_VA Sup.tif:0230-0243	0.089	13.722	0	73	4.627	1.32	0.393	0.227	32041.6			1250	90.7	0.907
11	033121_VA Sup.tif:0230-0243	0.089	12.216	0	60	5.067	1.32	0.393	0.227	31229.1			2500	88.4	0.884
12	033121_VA Sup.tif:0230-0243	0.089	12.555	0	61	5.54	1.32	0.393	0.227	29462.7			5000	83.4	0.834

## Sheet: WT (3)
040221_Unbound WT
Alpha Ab
	Label	Area	Mean	Min	Max	BX	BY	Width	Height	RawIntDen			GST-TOG1/2 (nM)	Proportion of unbound tubulin
1	040221_WT.tif:0250-0092	0.117	15.763	0	85	0.4	1.533	0.427	0.273	41362			0	100	1
2	040221_WT.tif:0250-0092	0.117	10.33	0	67	0.82	1.533	0.427	0.273	41105			0
3	040221_WT.tif:0250-0092	0.117	9.968	0	63	1.22	1.533	0.427	0.273	26157			9.76562	63.2392	0.632392
4	040221_WT.tif:0250-0092	0.117	5.7	0	33	1.6	1.533	0.427	0.273	23391			19.5312	56.5519	0.565519
5	040221_WT.tif:0250-0092	0.117	4.655	0	32	1.973	1.533	0.427	0.273	20808			39.0625	50.307	0.50307
6	040221_WT.tif:0250-0092	0.117	5.918	0	31	2.34	1.533	0.427	0.273	19978			78.125	48.3004	0.483004
7	040221_WT.tif:0250-0092	0.117	7.377	0	39	2.74	1.533	0.427	0.273	19717			156.25	47.6694	0.476694
8	040221_WT.tif:0250-0092	0.117	8.914	0	47	3.167	1.573	0.427	0.273	19356			312.5	46.7966	0.467966
9	040221_WT.tif:0250-0092	0.117	7.614	0	46	3.56	1.587	0.427	0.273	17750			625	42.9138	0.429138
10	040221_WT.tif:0250-0092	0.117	7.514	0	43	3.947	1.613	0.427	0.273	15528			1250	37.5417	0.375417
11	040221_WT.tif:0250-0092	0.117	7.93	0	42	4.327	1.633	0.427	0.273	14957			2500	36.1612	0.361612
12	040221_WT.tif:0250-0092	0.117	6.764	0	45	4.753	1.647	0.427	0.273	12215			5000	29.5319	0.295319

## Sheet: V410I (3)
040221_Unbound VI
Alpha Ab
	Label	Area	Mean	Min	Max	BX	BY	Width	Height	RawIntDen			GST-TOG1/2 (nM)	Proportion of unbound tubulin
1	040221_VI.tif:VI ROI	0.09	11.572	0	63	1.573	1.007	0.373	0.24	23329			0	100	1
2	040221_VI.tif:VI ROI	0.09	12.808	0	71	1.967	1	0.373	0.24	24820			0
3	040221_VI.tif:VI ROI	0.09	12.66	0	69	2.353	0.973	0.373	0.24	24520.6			9.76562	105.108	1.05108
4	040221_VI.tif:VI ROI	0.09	11.564	0	65	2.753	0.953	0.373	0.24	20723.9			19.5312	88.8334	0.888334
5	040221_VI.tif:VI ROI	0.09	11.156	0	63	3.133	0.953	0.373	0.24	20468.3			39.0625	87.7377	0.877377
6	040221_VI.tif:VI ROI	0.09	12.067	0	70	3.527	0.953	0.373	0.24	20522.5			78.125	87.9697	0.879697
7	040221_VI.tif:VI ROI	0.09	12.534	0	73	3.907	0.953	0.373	0.24	19133.8			156.25	82.0174	0.820174
8	040221_VI.tif:VI ROI	0.09	12.55	0	63	4.293	0.953	0.373	0.24	19327.8			312.5	82.8489	0.828489
9	040221_VI.tif:VI ROI	0.09	12.871	0	79	4.7	0.953	0.373	0.24	17799.4			625	76.2971	0.762971
10	040221_VI.tif:VI ROI	0.09	13.645	0	79	5.087	0.953	0.373	0.24	17773.8			1250	76.1876	0.761876
11	040221_VI.tif:VI ROI	0.09	12.615	0	72	5.467	0.953	0.373	0.24	16992.7			2500	72.8392	0.728392
12	040221_VI.tif:VI ROI	0.09	12.344	0	72	5.86	0.953	0.373	0.24	15452.9			5000	66.2391	0.662391

## Sheet: V410A (3)
040221_Unbound VA
Alpha Ab
	Label	Area	Mean	Min	Max	BX	BY	Width	Height	RawIntDen			GST-TOG1/2 (nM)	Proportion of unbound tubulin
1	040221_VA.tif:0293-0136	0.096	18.53	0	83	0.7	1.84	0.413	0.233	40211			0	100	1
2	040221_VA.tif:0293-0136	0.096	14.3	0	71	1.16	1.84	0.413	0.233	41030			0
3	040221_VA.tif:0293-0136	0.096	12.546	0	65	1.607	1.84	0.413	0.233	40410.3			9.76562	100.496	1.00496
4	040221_VA.tif:0293-0136	0.096	15.03	0	76	2.047	1.84	0.413	0.233	42839.8			19.5312	106.538	1.06538
5	040221_VA.tif:0293-0136	0.096	11.728	0	63	2.487	1.84	0.413	0.233	39746.9			39.0625	98.8459	0.988459
6	040221_VA.tif:0293-0136	0.096	12.579	0	64	2.94	1.853	0.413	0.233	39351.3			78.125	97.8621	0.978621
7	040221_VA.tif:0293-0136	0.096	11.847	0	61	3.393	1.853	0.413	0.233	39402.7			156.25	97.9899	0.979899
8	040221_VA.tif:0293-0136	0.096	10.416	0	58	3.84	1.853	0.413	0.233	39606.7			312.5	98.4973	0.984973
9	040221_VA.tif:0293-0136	0.096	9.472	0	54	4.267	1.853	0.413	0.233	38754.9			625	96.3788	0.963788
10	040221_VA.tif:0293-0136	0.096	10.91	0	62	4.713	1.853	0.413	0.233	37887.4			1250	94.2215	0.942215
11	040221_VA.tif:0293-0136	0.096	10.894	0	55	5.167	1.853	0.413	0.233	36308.3			2500	90.2943	0.902943
12	040221_VA.tif:0293-0136	0.096	12.703	0	68	5.647	1.853	0.413	0.233	35026.6			5000	87.1069	0.871069
