# Supplementary material for: TUBA1A tubulinopathy mutants disrupt neuron morphogenesis and override XMAP215/Stu2 regulation of microtubule dynamics
Source: eLife. 2022 May 5;11:e76189. doi: 10.7554/eLife.76189 (PMC9236607; doi:10.7554/eLife.76189)
Supplement: Figure 5—source data 3. [file elife-76189-fig5-data3.xlsx]

## Sheet: 0h 4859
100721
100721_4859_0h_
Slice	Astrals (Type 1)	No astrals (Type 2)	Proportion w/ astrals
2	4	2	0.666667
100721_4859_0h_001
Slice	Astrals (Type 1)	No astrals (Type 2)	Proportion w/ astrals
2	3	3	0.5
100721_4859_0h_002
Slice	Astrals (Type 1)	No astrals (Type 2)	Proportion w/ astrals
2	27	29	0.482143
100721_4859_0h_003
Slice	Astrals (Type 1)	No astrals (Type 2)	Proportion w/ astrals
2	27	37	0.421875
100721_4859_0h_004
Slice	Astrals (Type 1)	No astrals (Type 2)	Proportion w/ astrals
2	13	23	0.361111
100721_4859_0h_005
Slice	Astrals (Type 1)	No astrals (Type 2)	Proportion w/ astrals
2	22	19	0.536585
100721_4859_0h_006
Slice	Astrals (Type 1)	No astrals (Type 2)	Proportion w/ astrals
2	11	12	0.478261
		Average	0.492377
	107	125

## Sheet: 1.5h 4859
100721
100721_4859_1.5h_
Slice	Astrals (Type 1)	No astrals (Type 2)	Proportion w/ astrals
2	26	52	0.333333
100721_4859_1.5h_003
Slice	Astrals (Type 1)	No astrals (Type 2)	Proportion w/ astrals
2	13	27	0.325
100721_4859_1.5h_004
Slice	Astrals (Type 1)	No astrals (Type 2)	Proportion w/ astrals
2	13	20	0.393939
100721_4859_1.5h_005
Slice	Astrals (Type 1)	No astrals (Type 2)	Proportion w/ astrals
2	26	69	0.273684
100721_4859_1.5h_006
Slice	Astrals (Type 1)	No astrals (Type 2)	Proportion w/ astrals
2	28	46	0.378378
100721_4859_1.5h_008
Slice	Astrals (Type 1)	No astrals (Type 2)	Proportion w/ astrals
2	18	32	0.36
100721_4859_1.5h_009
Slice	Astrals (Type 1)	No astrals (Type 2)	Proportion w/ astrals
2	6	15	0.285714
100721_4859_1.5h_010
Slice	Astrals (Type 1)	No astrals (Type 2)	Proportion w/ astrals
2	11	36	0.234043
			Proportion w/ astrals
		Average	0.323012

## Sheet: 0h 4860
100721
100721_4860_0h_
Slice	Astrals (Type 1)	No astrals (Type 2)	Proportion w/ astrals
2	31	38	0.449275
100721_4860_0h_001
Slice	Astrals (Type 1)	No astrals (Type 2)	Proportion w/ astrals
2	16	11	0.592593
100721_4860_0h_003
Slice	Astrals (Type 1)	No astrals (Type 2)	Proportion w/ astrals
2	34	39	0.465753
100721_4860_0h_004
Slice	Astrals (Type 1)	No astrals (Type 2)	Proportion w/ astrals
2	15	12	0.555556
100721_4860_0h_005
Slice	Astrals (Type 1)	No astrals (Type 2)	Proportion w/ astrals
2	22	19	0.536585
			Proportion w/ astrals
		Average	0.519952

## Sheet: 1.5h 4860
100721
100721_4860_1.5h_
Slice	Astrals (Type 1)	No astrals (Type 2)	Proportion w/ astrals
2	70	74	0.486111
100721_4860_1.5h_001
Slice	Astrals (Type 1)	No astrals (Type 2)	Proportion w/ astrals
2	55	47	0.539216
100721_4860_1.5h_002
Slice	Astrals (Type 1)	No astrals (Type 2)	Proportion w/ astrals
2	28	20	0.583333
100721_4860_1.5h_003
Slice	Astrals (Type 1)	No astrals (Type 2)	Proportion w/ astrals
2	38	43	0.469136
100721_4860_1.5h_004
Slice	Astrals (Type 1)	No astrals (Type 2)	Proportion w/ astrals
2	71	63	0.529851
		Averages	0.521529

## Sheet: 0h 4861
100721
4861_0h_
Slice	Astrals (Type 1)	No astrals (Type 2)	Proportion
2	34	30	0.53125
4861_0h_001
Slice	Astrals (Type 1)	No astrals (Type 2)	Proportion
2	106	101	0.512077
4861_0h_002
Slice	Astrals (Type 1)	No astrals (Type 2)	Proportion
2	115	117	0.49569
		Averages	0.513006

## Sheet: 1.5h 4861
100721
100721_4861_1.5h_001
Slice	Astrals (Type 1)	No astrals (Type 2)	Proportion
2	48	25	0.657534
100721_4861_1.5h_002
Slice	Astrals (Type 1)	No astrals (Type 2)	Proportion
2	57	32	0.640449
100721_4861_1.5h_003
Slice	Astrals (Type 1)	No astrals (Type 2)	Proportion
2	51	29	0.6375
100721_4861_1.5h_004
Slice	Astrals (Type 1)	No astrals (Type 2)	Proportion
2	59	38	0.608247
100721_4861_1.5h_005
Slice	Astrals (Type 1)	No astrals (Type 2)	Proportion
2	56	42	0.571429
100721_4861_1.5h_006
Slice	Astrals (Type 1)	No astrals (Type 2)	Proportion
2	67	33	0.67
100721_4861_1.5h_007
Slice	Astrals (Type 1)	No astrals (Type 2)	Proportion
2	15	27	0.357143
100721_4861_1.5h_008
Slice	Astrals (Type 1)	No astrals (Type 2)	Proportion
2	42	33	0.56
100721_4861_1.5h_009
Slice	Astrals (Type 1)	No astrals (Type 2)	Proportion
2	78	55	0.586466
100721_4861_1.5h_010
Slice	Astrals (Type 1)	No astrals (Type 2)	Proportion
2	57	36	0.612903
		Averages	0.590167

## Sheet: 0h 4859 (2)
100821
100821_4859_0h_001
Slice	Astrals (Type 1)	No astrals (Type 2)	Proportion w/ astrals
2	29	31	0.483333
100821_4859_0h_002
Slice	Astrals (Type 1)	No astrals (Type 2)	Proportion w/ astrals
2	24	23	0.510638
100821_4859_0h_003
Slice	Astrals (Type 1)	No astrals (Type 2)	Proportion w/ astrals
2	50	42	0.543478
100821_4859_0h_007
Slice	Astrals (Type 1)	No astrals (Type 2)	Proportion w/ astrals
2	14	12	0.538462
100821_4859_0h_008
Slice	Astrals (Type 1)	No astrals (Type 2)	Proportion w/ astrals
2	14	18	0.4375
100821_4859_0h_009
Slice	Astrals (Type 1)	No astrals (Type 2)	Proportion w/ astrals
2	21	8	0.724138
100821_4859_0h_010
Slice	Astrals (Type 1)	No astrals (Type 2)	Proportion w/ astrals
2	17	7	0.708333
		Average	0.563698

## Sheet: 1.5h 4859 (2)
100821
4859_1.5h_006
Slice	Astrals (Type 1)	No astrals (Type 2)	Proportion
2	27	60	0.310345
4859_1.5h_007
Slice	Astrals (Type 1)	No astrals (Type 2)	Proportion
2	34	64	0.346939
4859_1.5h_008
Slice	Astrals (Type 1)	No astrals (Type 2)	Proportion
2	41	63	0.394231
4859_1.5h_009
Slice	Astrals (Type 1)	No astrals (Type 2)	Proportion
2	26	64	0.288889
4859_1.5h_010
Slice	Astrals (Type 1)	No astrals (Type 2)	Proportion
2	41	67	0.37963
4859_1.5h_011
Slice	Astrals (Type 1)	No astrals (Type 2)	Proportion
2	29	65	0.308511
		Averages	0.338091

## Sheet: 0h 4860 (2)
100821
100821_4860_0h_006
Slice	Astrals (Type 1)	No astrals (Type 2)	Proportion w/ astrals
2	16	17	0.484848
100821_4860_0h_008
Slice	Astrals (Type 1)	No astrals (Type 2)	Proportion w/ astrals
2	20	17	0.540541
100821_4860_0h_009
Slice	Astrals (Type 1)	No astrals (Type 2)	Proportion w/ astrals
2	167	127	0.568027
100821_4860_0h_010
Slice	Astrals (Type 1)	No astrals (Type 2)	Proportion w/ astrals
2	46	24	0.657143
		Averages	0.56264

## Sheet: 1.5h 4860 (2)
100821
100821_4860_1.5h_005
Slice	Astrals (Type 1)	No astrals (Type 2)	Proportion w/ astrals
2	59	68	0.464567
100821_4860_1.5h_007
Slice	Astrals (Type 1)	No astrals (Type 2)	Proportion w/ astrals
2	23	18	0.560976
100821_4860_1.5h_008
Slice	Astrals (Type 1)	No astrals (Type 2)	Proportion w/ astrals
2	18	18	0.5
100821_4860_1.5h_009
Slice	Astrals (Type 1)	No astrals (Type 2)	Proportion w/ astrals
2	51	51	0.5
100821_4860_1.5h_010
Slice	Astrals (Type 1)	No astrals (Type 2)	Proportion w/ astrals
2	74	96	0.435294
		Averages	0.492167

[truncated: 8 more sheets: 0h 4861 (2), 1.5h 4861 (2), 4859 0h, 4859 1.5h, 4860 0h, 4860 1.5h, 4861 0h, 4861 1.5h]
