# Supplementary material for: TUBA1A tubulinopathy mutants disrupt neuron morphogenesis and override XMAP215/Stu2 regulation of microtubule dynamics
Source: eLife. 2022 May 5;11:e76189. doi: 10.7554/eLife.76189 (PMC9236607; doi:10.7554/eLife.76189)
Supplement: Figure 6—source data 1. [file elife-76189-fig6-data1.xlsx]

## Sheet: WT_0.5uM rep 1
051721_WT 0.5uM_Run 2_Polymerization
		Label	X	X corrected	Y	BX	BY	Width	Height	Ch	Change in distance (um)	Change in distance corrected (um)	Change in Y	Change in time (s)	um/sec	um/min	um/hr
#1	1	Reslice of 051721_WT 0.5uM_001.nd2:1	0.91	0.979993	1	0.91	1	0.065	1	1	1.853	1.99552	2608.5	2608.5	0.000765009	0.0459005	2.75403
x=45.11(694)	2	Reslice of 051721_WT 0.5uM_001.nd2:1	2.763	2.97552	2609.5	2.795	2610	0.065	1	1
y=20.28(312)
#2	3	Reslice of 051721_WT 0.5uM_001.nd2:1	0.78	0.839994	1	0.78	1	0.065	1	1	0.964	1.03815	1868.17	1868.17	0.000555703	0.0333422	2.00053
x=35.23(542)	4	Reslice of 051721_WT 0.5uM_001.nd2:1	1.744	1.87814	1869.17	1.755	1869	0.065	1	1
y=12.94(199)
#3	5	Reslice of 051721_WT 0.5uM_001.nd2:1	1.69	1.81999	0	1.69	0	0.065	1	1	1.484	1.59814	2420.17	2420.17	0.000660344	0.0396206	2.37724
x=31.39(483)	6	Reslice of 051721_WT 0.5uM_001.nd2:1	3.174	3.41813	2420.17	3.185	2420	0.065	1	1
y=34.71(534)	7	Reslice of 051721_WT 0.5uM_001.nd2:1	0.054	0.0581535	2943.83	0.065	2944	0.065	1	1	0.434	0.467381	655.334	655.334	0.000713196	0.0427917	2.5675
	8	Reslice of 051721_WT 0.5uM_001.nd2:1	0.488	0.525535	3599.17	0.52	3599	0.065	1	1
#4	9	Reslice of 051721_WT 0.5uM_001.nd2:1	-0.033	-0.0355382	110	0	110	0.065	1	1	0.813	0.875533	1041	1041	0.000841049	0.050463	3.02778
x=54.34(836)	10	Reslice of 051721_WT 0.5uM_001.nd2:1	0.78	0.839994	1151	0.78	1151	0.065	1	1
y=29.12(448)																		2.54542
051721_WT 0.5uM_Run 2_Depolymerization
		Label	X	X corrected	Y	BX	BY	Width	Height	Ch	Change in distance (um)	Change in distance corrected (um)	Change in Y	Change in time (s)	um/sec	um/min	um/hr
#1	2	Reslice of 051721_WT 0.5uM_001.tif:1	2.763	2.97552	2609.5	2.795	2610	0.065	1	1	-2.796	-3.01106	16	16	-0.188191	-11.2915	-677.488	11.2915
x=45.11(694)	3	Reslice of 051721_WT 0.5uM_001.tif:1	-0.033	-0.0355382	2625.5	0	2626	0.065	1	1
y=20.28(312)
#2	5	Reslice of 051721_WT 0.5uM_002.tif:1	1.744	1.87814	1869.17	1.755	1869	0.065	1	1	-1.744	-1.87814	9.833	9.833	-0.191004	-11.4602	-687.614	11.4602
x=35.23(542)	6	Reslice of 051721_WT 0.5uM_002.tif:1	0	0	1879	0	1879	0.065	1	1
y=12.94(199)
#3	8	Reslice of 051721_WT 0.5uM_003.tif:1	3.174	3.41813	2420.17	3.185	2420	0.065	1	1	-3.141	-3.38259	19.333	19.333	-0.174965	-10.4979	-629.873	10.4979
x=31.39(483)	12	Reslice of 051721_WT 0.5uM_003.tif:1	0.033	0.0355382	2439.5	0.065	2440	0.065	1	1
y=34.71(534)
#4	14	Reslice of 051721_WT 0.5uM_004.tif:1	0.78	0.839994	1151	0.78	1151	0.065	1	1	-0.813	-0.875533	7.5	7.5	-0.116738	-7.00426	-420.256	7.00426
x=54.34(836)	15	Reslice of 051721_WT 0.5uM_004.tif:1	-0.033	-0.0355382	1158.5	0	1159	0.065	1	1
y=29.12(448)

## Sheet: WT_0.5uM rep 2
070821_WT 0.5uM_Run 2_Polymerization
		Label	X	X corrected	Y	BX	BY	Width	Height	Ch	Change in distance (um)	Change in distance corrected (um)	Change in Y	Change in time (s)	um/sec	um/min	um/hr
#1	1	Reslice of 070821_WT_0.5uM_run2_.tif:2	1.365	1.46999	0	1.365	0	0.065	1	2	0.401	0.431843	564.833	564.833	0.00076455	0.045873	2.75238
x=30.16(464)	2	Reslice of 070821_WT_0.5uM_run2_.tif:2	1.766	1.90183	564.833	1.755	565	0.065	1	2
y=15.15(233)	4	Reslice of 070821_WT_0.5uM_run2_.tif:2	-0.033	-0.0355382	1485.83	0	1486	0.065	1	2	1.821	1.96106	2112	2112	0.000928534	0.055712	3.34272
	5	Reslice of 070821_WT_0.5uM_run2_.tif:2	1.788	1.92553	3597.83	1.82	3598	0.065	1	2
#2	6	Reslice of 070821_WT_0.5uM_run2_.tif:2	1.3	1.39999	0	1.3	0	0.065	1	2	2.221	2.39183	2873.5	2873.5	0.000832375	0.0499425	2.99655
x=50.51(777)	7	Reslice of 070821_WT_0.5uM_run2_.tif:2	3.521	3.79182	2873.5	3.51	2874	0.065	1	2
y=11.51(177)
#3	9	Reslice of 070821_WT_0.5uM_run2_.tif:2	0.834	0.898148	-0.5	0.845	0	0.065	1	2	0.78	0.839994	2275	2275	0.000369228	0.0221537	1.32922
x=47.45(730)	10	Reslice of 070821_WT_0.5uM_run2_.tif:2	1.614	1.73814	2274.5	1.625	2275	0.065	1	2
y=23.07(355)
#4	12	Reslice of 070821_WT_0.5uM_run2_.tif:2	0.921	0.991839	-0.5	0.91	0	0.065	1	2	1.213	1.3063	1481.33	1481.33	0.00088184	0.0529104	3.17462
x=53.30(820)	13	Reslice of 070821_WT_0.5uM_run2_.tif:2	2.134	2.29814	1480.83	2.145	1481	0.065	1	2
y=5.46(84)	14	Reslice of 070821_WT_0.5uM_run2_.tif:2	0.488	0.525535	1495.5	0.52	1496	0.065	1	2	0.346	0.372613	393	393	0.000948124	0.0568875	3.41325
	15	Reslice of 070821_WT_0.5uM_run2_.tif:2	0.834	0.898148	1888.5	0.845	1889	0.065	1	2
#6	22	Reslice of 070821_WT_0.5uM_run2_.tif:2	1.788	1.92553	-0.5	1.82	0	0.065	1	2	0.779	0.838917	1099.33	1099.33	0.000763115	0.0457869	2.74721
x=12.48(192)	23	Reslice of 070821_WT_0.5uM_run2_.tif:2	2.567	2.76444	1098.83	2.6	1099	0.065	1	2
y=33.15(510)
#7	25	Reslice of 070821_WT_0.5uM_run2_.tif:2	1.56	1.67999	2	1.56	2	0.065	1	2	0.423	0.455535	410.5	410.5	0.00110971	0.0665825	3.99495
x=12.09(186)	26	Reslice of 070821_WT_0.5uM_run2_.tif:2	1.983	2.13552	412.5	2.015	413	0.065	1	2
y=30.36(467)	27	Reslice of 070821_WT_0.5uM_run2_.tif:2	0.878	0.945532	421.5	0.91	422	0.065	1	2	2.209	2.37891	2244	2244	0.00106012	0.0636071	3.81643
	28	Reslice of 070821_WT_0.5uM_run2_.tif:2	3.087	3.32444	2665.5	3.12	2666	0.065	1	2
070821_WT 0.5uM_Run 2_Depolymerization
		Label	X	X corrected	Y	BX	BY	Width	Height	Ch	Change in distance (um)	Change in distance corrected (um)	Change in Y	Change in time (s)	um/sec	um/min	um/hr
#1	2	Reslice of 070821_WT_0.5uM_run2_.tif:2	1.766	1.90183	564.833	1.755	565	0.065	1	2	-1.82	-1.95999	13.334	13.334	-0.146992	-8.8195	-529.17	8.8195
x=30.16(464)	3	Reslice of 070821_WT_0.5uM_run2_.tif:2	-0.054	-0.0581535	578.167	0	0	0	0	2
y=15.15(233)
#2	7	Reslice of 070821_WT_0.5uM_run2_.tif:2	3.521	3.79182	2873.5	3.51	2874	0.065	1	2	-3.467	-3.73367	22.667	22.667	-0.164718	-9.88309	-592.985	9.88309
x=50.51(777)	8	Reslice of 070821_WT_0.5uM_run2_.tif:2	0.054	0.0581535	2896.17	0.065	2896	0.065	1	2
y=11.51(177)
#3	10	Reslice of 070821_WT_0.5uM_run2_.tif:2	1.614	1.73814	2274.5	1.625	2275	0.065	1	2	-1.56	-1.67999	9.333	9.333	-0.180005	-10.8003	-648.019	10.8003
x=47.45(730)	11	Reslice of 070821_WT_0.5uM_run2_.tif:2	0.054	0.0581535	2283.83	0.065	2284	0.065	1	2
y=23.07(355)
#4	13	Reslice of 070821_WT_0.5uM_run2_.tif:2	2.134	2.29814	1480.83	2.145	1481	0.065	1	2	-1.646	-1.7726	14.667	14.667	-0.120857	-7.25139	-435.084	7.25139
x=53.30(820)	14	Reslice of 070821_WT_0.5uM_run2_.tif:2	0.488	0.525535	1495.5	0.52	1496	0.065	1	2
y=5.46(84)	15	Reslice of 070821_WT_0.5uM_run2_.tif:2	0.834	0.898148	1888.5	0.845	1889	0.065	1	2	-0.867	-0.933686	13.333	13.333	-0.0700282	-4.20169	-252.102	4.20169
	16	Reslice of 070821_WT_0.5uM_run2_.tif:2	-0.033	-0.0355382	1901.83	0	1902	0.065	1	2
#5	18	Reslice of 070821_WT_0.5uM_run2_.tif:2	2.134	2.29814	547.5	2.145	548	0.065	1	2	-2.08	-2.23998	22.667	22.667	-0.0988214	-5.92928	-355.757	5.92928
x=63.64(979)	19	Reslice of 070821_WT_0.5uM_run2_.tif:2	0.054	0.0581535	570.167	0.065	570	0.065	1	2
y=33.93(522)	20	Reslice of 070821_WT_0.5uM_run2_.tif:2	2.221	2.39183	2143.17	2.21	2143	0.065	1	2	-2.253	-2.42629	21.333	21.333	-0.113734	-6.82405	-409.443	6.82405
	21	Reslice of 070821_WT_0.5uM_run2_.tif:2	-0.032	-0.0344613	2164.5	0	2165	0.065	1	2
#6	23	Reslice of 070821_WT_0.5uM_run2_.tif:2	2.567	2.76444	1098.83	2.6	1099	0.065	1	2	-2.6	-2.79998	30.667	30.667	-0.0913027	-5.47816	-328.69	5.47816
x=12.48(192)	24	Reslice of 070821_WT_0.5uM_run2_.tif:2	-0.033	-0.0355382	1129.5	0	1130	0.065	1	2
y=33.15(510)
#7	26	Reslice of 070821_WT_0.5uM_run2_.tif:2	1.983	2.13552	412.5	2.015	413	0.065	1	2	-1.105	-1.18999	9	9	-0.132221	-7.93328	-475.997	7.93328
x=12.09(186)	27	Reslice of 070821_WT_0.5uM_run2_.tif:2	0.878	0.945532	421.5	0.91	422	0.065	1	2
y=30.36(467)	28	Reslice of 070821_WT_0.5uM_run2_.tif:2	3.087	3.32444	2665.5	3.12	2666	0.065	1	2	-2.014	-2.16891	19	19	-0.114153	-6.84918	-410.951	6.84918
	29	Reslice of 070821_WT_0.5uM_run2_.tif:2	1.073	1.15553	2684.5	1.105	2685	0.065	1	2

## Sheet: WT_0.5uM rep 3
070821_WT 0.5uM_Run 1_Polymerization
		Label	X	X corrected	Y	BX	BY	Width	Height	Ch	Change in distance (um)	Change in distance corrected (um)	Change in Y	Change in time (s)	um/sec	um/min	um/hr
#1	1	Reslice of 070821_WT_0.5uM_.nd2:1	1.441	1.55184	0.833	1.43	1	0.065	1	1	2.513	2.70629	3598.33	3598.33	0.000752095	0.0451257	2.70754
x=30.03(462)	2	Reslice of 070821_WT_0.5uM_.nd2:1	3.954	4.25812	3599.17	3.965	3599	0.065	1	1
y=22.1(340)
#2	3	Reslice of 070821_WT_0.5uM_.nd2:2	0.65	0.699995	1	0.65	1	0.065	1	2	0.358	0.385536	615.833	615.833	0.00062604	0.0375624	2.25374
x=23.53(362)	4	Reslice of 070821_WT_0.5uM_.nd2:2	1.008	1.08553	616.833	1.04	617	0.065	1	2
y=31.85(490)	6	Reslice of 070821_WT_0.5uM_.nd2:2	-0.033	-0.0355382	724.167	0	724	0.065	1	2	1.647	1.77368	1999.33	1999.33	0.000887136	0.0532282	3.19369
	7	Reslice of 070821_WT_0.5uM_.nd2:2	1.614	1.73814	2723.5	1.625	2724	0.065	1	2
#4	12	Reslice of 070821_WT_0.5uM_.nd2:2	2.21	2.37998	0	2.21	0	0.065	1	2	2.178	2.34552	2780.17	2780.17	0.000843662	0.0506197	3.03718
x=52.2(803)	13	Reslice of 070821_WT_0.5uM_.nd2:2	4.388	4.72551	2780.17	4.42	2780	0.065	1	2
y=12.03(185)
070821_WT 0.5uM_Run 1_Depolymerization
		Label	X	X corrected	Y	BX	BY	Width	Height	Ch	Change in distance (um)	Change in distance corrected (um)	Change in Y	Change in time (s)	um/sec	um/min	um/hr
#2	4	Reslice of 070821_WT_0.5uM_.nd2:2	1.008	1.08553	616.833	1.04	617	0.065	1	2	-1.041	-1.12107	10.667	10.667	-0.105097	-6.30582	-378.349	6.30582
x=23.53(362)	5	Reslice of 070821_WT_0.5uM_.nd2:2	-0.033	-0.0355382	627.5	0	628	0.065	1	2
y=31.85(490)	7	Reslice of 070821_WT_0.5uM_.nd2:2	1.614	1.73814	2723.5	1.625	2724	0.065	1	2	-1.647	-1.77368	10.667	10.667	-0.166277	-9.97664	-598.598	9.97664
	8	Reslice of 070821_WT_0.5uM_.nd2:2	-0.033	-0.0355382	2734.17	0	2734	0.065	1	2
#3	10	Reslice of 070821_WT_0.5uM_.nd2:2	2.567	2.76444	1695.5	2.6	1696	0.065	1	2	-2.513	-2.70629	38.667	38.667	-0.0699896	-4.19938	-251.963	4.19938
x=28.93(445)	11	Reslice of 070821_WT_0.5uM_.nd2:2	0.054	0.0581535	1734.17	0.065	1734	0.065	1	2
y=2.99(46)
#4	13	Reslice of 070821_WT_0.5uM_.nd2:2	4.388	4.72551	2780.17	4.42	2780	0.065	1	2	-4.334	-4.66735	21.333	21.333	-0.218786	-13.1271	-787.628	13.1271
x=52.2(803)	14	Reslice of 070821_WT_0.5uM_.nd2:2	0.054	0.0581535	2801.5	0.065	2802	0.065	1	2
y=12.03(185)

## Sheet: WT_0.7uM rep 1
051321_WT 0.7uM_Run 1_Polymerization
		Label	X	X corrected	Y	BX	BY	Width	Height	Ch	Change in distance (um)	Change in distance corrected (um)	Change in Y	Change in time (s)	um/sec	um/min	um/hr
#1	1	Reslice of 051321_WT 0.7uM_.nd2:1	1.365	1.46999	2	1.365	2	0.065	1	1	2.568	2.76552	2861.5	2861.5	0.000966458	0.0579875	3.47925
x=15.28(235)	2	Reslice of 051321_WT 0.7uM_.nd2:1	3.933	4.23551	2863.5	3.965	2864	0.065	1	1
y=15.6(240)
#2	3	Reslice of 051321_WT 0.7uM_.nd2:1	2.21	2.37998	1	2.21	1	0.065	1	1	2.958	3.18552	3597.5	3597.5	0.000885481	0.0531288	3.18773
x=14.11(217)	4	Reslice of 051321_WT 0.7uM_.nd2:1	5.168	5.5655	3598.5	5.2	3599	0.065	1	1
y=16.51(254)
#3	5	Reslice of 051321_WT 0.7uM_003.tif:1	0.65	0.699995	0.5	0.65	1	0.065	1	1	1.593	1.71553	1735.5	1735.5	0.000988491	0.0593095	3.55857
x=17.42(268)	6	Reslice of 051321_WT 0.7uM_003.tif:1	2.243	2.41552	1736	2.275	1736	0.065	1	1
y=9.23(142)	7	Reslice of 051321_WT 0.7uM_003.tif:1	0	0	2328	0	2328	0.065	1	1	1.43	1.53999	1271.5	1271.5	0.00121116	0.0726696	4.36017
	8	Reslice of 051321_WT 0.7uM_003.tif:1	1.43	1.53999	3599.5	1.43	3600	0.065	1	1
#4	9	Reslice of 051321_WT 0.7uM_.nd2:1	2.08	2.23998	2	2.08	2	0.065	1	1	1.918	2.06552	3272.5	3272.5	0.000631176	0.0378706	2.27223
x=8.91(137)	10	Reslice of 051321_WT 0.7uM_.nd2:1	3.998	4.30551	3274.5	4.03	3275	0.065	1	1
y=31.59(486)
051321_WT 0.7uM_Run 1_Depolymerization
		Label	X	X corrected	Y	BX	BY	Width	Height	Ch	Change in distance (um)	Change in distance corrected (um)	Change in Y	Change in time (s)	um/sec	um/min	um/hr	µm/min
#1	2	Reslice of 051321_WT 0.7uM_001.tif:1	3.933	4.23551	2863.5	3.965	2864	0.065	1	1	-3.966	-4.27105	39	39	-0.109514	-6.57084	-394.251	6.57084
x=15.28(235)	3	Reslice of 051321_WT 0.7uM_001.tif:1	-0.033	-0.0355382	2902.5	0	2903	0.065	1	1
y=15.6(240)
#3	4	Reslice of 051321_WT 0.7uM_003.tif:1	2.47	2.65998	1735	2.47	1735	0.065	1	1	-2.437	-2.62444	18.5	18.5	-0.141862	-8.51171	-510.703	8.51171
x=17.42(268)	5	Reslice of 051321_WT 0.7uM_003.tif:1	0.033	0.0355382	1753.5	0.065	1754	0.065	1	1
y=9.23(142)
#4	7	Reslice of 051321_WT 0.7uM_004.tif:1	3.998	4.30551	3274.5	4.03	3275	0.065	1	1	-3.965	-4.26997	37	37	-0.115405	-6.92428	-415.457	6.92428
x=8.91(137)	8	Reslice of 051321_WT 0.7uM_004.tif:1	0.033	0.0355382	3311.5	0.065	3312	0.065	1	1
y=31.59(486)

## Sheet: WT_0.7uM rep 2
051321_WT 0.7uM_Run 2_Polymerization
		Label	X	X corrected	Y	BX	BY	Width	Height	Ch	Change in distance (um)	Change in distance corrected (um)	Change in Y	Change in time (s)	um/sec	um/min	um/hr
#1	1	Reslice of 051321_WT 0.7uM_001.nd2:1	1.43	1.53999	1	1.43	1	0.065	1	1	0.444	0.478151	306.5	306.5	0.00156003	0.0936021	5.61612
x=4.23(65)	2	Reslice of 051321_WT 0.7uM_001.nd2:1	1.874	2.01814	307.5	1.885	308	0.065	1	1
y=35.04 (539)	3	Reslice of 051321_WT 0.7uM_001.nd2:1	0.141	0.151845	369.167	0.13	369	0.065	1	1	2.86	3.07998	2842.33	2842.33	0.00108361	0.0650166	3.90099
	4	Reslice of 051321_WT 0.7uM_001.nd2:1	3.001	3.23182	3211.5	2.99	3212	0.065	1	1
#2	5	Reslice of 051321_WT 0.7uM_001.nd2:1	1.69	1.81999	1	1.69	1	0.065	1	1	4.084	4.39812	3595.5	3595.5	0.00122323	0.0733938	4.40363
x=18.85(290)	6	Reslice of 051321_WT 0.7uM_001.nd2:1	5.774	6.21811	3596.5	5.785	3597	0.065	1	1
y=18.46 (284)
#3	7	Reslice of 051321_WT 0.7uM_001.nd2:1	0.845	0.909994	0	0.845	0	0.065	1	1	1.029	1.10815	1179.17	1179.17	0.00093977	0.0563862	3.38317
x=37.25(573)	8	Reslice of 051321_WT 0.7uM_001.nd2:1	1.874	2.01814	1179.17	1.885	1179	0.065	1	1
y=15.41 (237)	9	Reslice of 051321_WT 0.7uM_001.nd2:1	0.098	0.105538	2273.83	0.13	2274	0.065	1	1	0.823	0.886302	1325.33	1325.33	0.000668738	0.0401243	2.40746
	10	Reslice of 051321_WT 0.7uM_001.nd2:1	0.921	0.991839	3599.17	0.91	3599	0.065	1	1
#4	11	Reslice of 051321_WT 0.7uM_001.nd2:1	1.495	1.60999	2	1.495	2	0.065	1	1	4.063	4.37551	3596.5	3596.5	0.0012166	0.0729961	4.37977
x=52.78(812)	12	Reslice of 051321_WT 0.7uM_001.nd2:1	5.558	5.9855	3598.5	5.59	3599	0.065	1	1
y=6.63(102)
#5	13	Reslice of 051321_WT 0.7uM_001.nd2:1	0.91	0.979993	2	0.91	2	0.065	1	1	3.867	4.16443	3595.5	3595.5	0.00115823	0.0694941	4.16965
x=63.51(977)	14	Reslice of 051321_WT 0.7uM_001.nd2:1	4.777	5.14443	3597.5	4.81	3598	0.065	1	1
y=24.64(379)
#6	1	Reslice of 051321_WT 0.7uM_001_background subtracted stabilized merged.tif:1	0.065	0.0699995	320	0.065	320	0.065	1	1	0.553	0.595534	748.167	748.167	0.000795991	0.0477595	2.86557
x=16.32(251)	2	Reslice of 051321_WT 0.7uM_001_background subtracted stabilized merged.tif:1	0.618	0.665534	1068.17	0.65	1068	0.065	1	1
y=33.28(512)
#7	3	Reslice of 051321_WT 0.7uM_001_background subtracted stabilized merged.tif:1	2.145	2.30998	1	2.145	1	0.065	1	1	3.998	4.30551	3598.5	3598.5	0.00119647	0.0717884	4.3073
x=0.26(4)	4	Reslice of 051321_WT 0.7uM_001_background subtracted stabilized merged.tif:1	6.143	6.61549	3599.5	6.175	3600	0.065	1	1
y=13.91(214)
#8	5	Reslice of 051321_WT 0.7uM_001_background subtracted stabilized merged.tif:1	1.43	1.53999	2	1.43	2	0.065	1	1	4.063	4.37551	3597.5	3597.5	0.00121626	0.0729758	4.37855
x=24.44(376)	6	Reslice of 051321_WT 0.7uM_001_background subtracted stabilized merged.tif:1	5.493	5.9155	3599.5	5.525	3600	0.065	1	1
y=11.38(176)
#9	7	Reslice of 051321_WT 0.7uM_001_background subtracted stabilized merged.tif:1	0.845	0.909994	0	0.845	0	0.065	1	1	3.868	4.16551	3599.5	3599.5	0.00115725	0.0694348	4.16609
x=58.7(903)	8	Reslice of 051321_WT 0.7uM_001_background subtracted stabilized merged.tif:1	4.713	5.0755	3599.5	4.745	3600	0.065	1	1
y=15.34(236)
#10	9	Reslice of 051321_WT 0.7uM_001_background subtracted stabilized merged.tif:1	0.91	0.979993	1	0.91	1	0.065	1	1	3.824	4.11813	3596.83	3596.83	0.00114493	0.0686959	4.12175
x=59.74(919)	10	Reslice of 051321_WT 0.7uM_001_background subtracted stabilized merged.tif:1	4.734	5.09812	3597.83	4.745	3598	0.065	1	1
y=24.77(381)
#11	11	Reslice of 051321_WT 0.7uM_001_background subtracted stabilized merged.tif:1	1.3	1.39999	1	1.3	1	0.065	1	1	3.694	3.97813	3416.83	3416.83	0.00116427	0.0698564	4.19138
x=49.21(757)	12	Reslice of 051321_WT 0.7uM_001_background subtracted stabilized merged.tif:1	4.994	5.37812	3417.83	5.005	3418	0.065	1	1
y=22.69(349)
#12	13	Reslice of 051321_WT 0.7uM_001_background subtracted stabilized merged.tif:1	1.365	1.46999	1	1.365	1	0.065	1	1	0.098	0.105538	150.5	150.5	0.000701247	0.0420748	2.52449
x=47.39(729)	14	Reslice of 051321_WT 0.7uM_001_background subtracted stabilized merged.tif:1	1.463	1.57553	151.5	1.495	152	0.065	1	1
y=33.41(514)	15	Reslice of 051321_WT 0.7uM_001_background subtracted stabilized merged.tif:1	0.098	0.105538	492.5	0.13	493	0.065	1	1	3.185	3.42998	3082	3082	0.00111291	0.0667744	4.00646
	16	Reslice of 051321_WT 0.7uM_001_background subtracted stabilized merged.tif:1	3.283	3.53551	3574.5	3.315	3575	0.065	1	1								3.92149
051321_WT 0.7uM_Run 2_Depolymerization
		Label	X	X corrected	Y	BX	BY	Width	Height	Ch	Change in distance (um)	Change in distance corrected (um)	Change in Y	Change in time (s)	um/sec	um/min	um/hr
#1	2	Reslice of 051321_WT 0.7uM_001.tif:1	1.874	2.01814	307.5	1.885	308	0.065	1	1	-1.841	-1.9826	19	19	-0.104347	-6.26085	-375.651	6.26085
x=4.23(65)	5	Reslice of 051321_WT 0.7uM_001.tif:1	0.033	0.0355382	326.5	0.065	327	0.065	1	1
y=35.04 (539)	4	Reslice of 051321_WT 0.7uM_001.tif:1	3.001	3.23182	3211.5	2.99	3212	0.065	1	1	-2.968	-3.19629	23	23	-0.138969	-8.33814	-500.288	8.33814
	6	Reslice of 051321_WT 0.7uM_001.tif:1	0.033	0.0355382	3234.5	0.065	3235	0.065	1	1
#3	8	Reslice of 051321_WT 0.7uM_003.tif:1	1.874	2.01814	1179.17	1.885	1179	0.065	1	1	-1.907	-2.05368	11.333	11.333	-0.181212	-10.8727	-652.364	10.8727
x=37.25(573)	11	Reslice of 051321_WT 0.7uM_003.tif:1	-0.033	-0.0355382	1190.5	0	1191	0.065	1	1
y=15.41 (237)
#6	13	Reslice of 051321_WT 0.7uM_006.tif:1	0.618	0.665534	1068.17	0.65	1068	0.065	1	1	-0.607	-0.653688	3.666	3.666	-0.178311	-10.6987	-641.919	10.6987
x=16.32(251)	14	Reslice of 051321_WT 0.7uM_006.tif:1	0.011	0.0118461	1071.83	0	1072	0.065	1	1
y=33.28(512)
#11	16	Reslice of 051321_WT 0.7uM_011.tif:1	4.994	5.37812	3417.83	5.005	3418	0.065	1	1	-5.027	-5.41366	29.667	29.667	-0.182481	-10.9488	-656.931	10.9488
x=49.21(757)	17	Reslice of 051321_WT 0.7uM_011.tif:1	-0.033	-0.0355382	3447.5	0	3448	0.065	1	1
y=22.69(349)
#12	19	Reslice of 051321_WT 0.7uM_012.tif:1	1.463	1.57553	151.5	1.495	152	0.065	1	1	-1.496	-1.61107	12	12	-0.134255	-8.05533	-483.32	8.05533
x=47.39(729)	22	Reslice of 051321_WT 0.7uM_012.tif:1	-0.033	-0.0355382	163.5	0	164	0.065	1	1
y=33.41(514)	21	Reslice of 051321_WT 0.7uM_012.tif:1	3.283	3.53551	3574.5	3.315	3575	0.065	1	1	-3.25	-3.49998	25	25	-0.139999	-8.39994	-503.997	8.39994
	23	Reslice of 051321_WT 0.7uM_012.tif:1	0.033	0.0355382	3599.5	0.065	3600	0.065	1	1

## Sheet: WT_0.7uM rep 3
071521_WT 0.7uM_Run 1_Polymerization
		Label	X	X corrected	Y	BX	BY	Width	Height	Ch	Change in distance (um)	Change in distance corrected (um)	Change in Y	Change in time (s)	um/sec	um/min	um/hr
#1	1	Reslice of 071521_WT_0.7uM_.nd2:2	1.885	2.02999	0	1.885	0	0.065	1	2	0.856	0.92184	1353.17	1353.17	0.000681246	0.0408748	2.45249
x=38.8(597)	2	Reslice of 071521_WT_0.7uM_.nd2:2	2.741	2.95183	1353.17	2.73	1353	0.065	1	2
y=2.34(36)	3	Reslice of 071521_WT_0.7uM_.nd2:2	-0.033	-0.0355382	1382.5	0	1383	0.065	1	2	1.647	1.77368	1531	1531	0.00115851	0.0695107	4.17064
	4	Reslice of 071521_WT_0.7uM_.nd2:2	1.614	1.73814	2913.5	1.625	2914	0.065	1	2
#2	6	Reslice of 071521_WT_0.7uM_.nd2:2	0.488	0.525535	0.5	0.52	1	0.065	1	2	1.235	1.32999	1944	1944	0.000684152	0.0410491	2.46295
x=39.2(603)	7	Reslice of 071521_WT_0.7uM_.nd2:2	1.723	1.85553	1944.5	1.755	1945	0.065	1	2
y=2.15(33)
#3	9	Reslice of 071521_WT_0.7uM_.nd2:2	1.723	1.85553	0.5	1.755	1	0.065	1	2	1.17	1.25999	1165	1165	0.00108154	0.0648923	3.89354
x=20.28(312)	10	Reslice of 071521_WT_0.7uM_.nd2:2	2.893	3.11552	1165.5	2.925	1166	0.065	1	2
y=9.69(149)	11	Reslice of 071521_WT_0.7uM_.nd2:2	1.268	1.36553	1180.5	1.3	1181	0.065	1	2	2.08	2.23998	2418	2418	0.000926379	0.0555827	3.33496
	12	Reslice of 071521_WT_0.7uM_.nd2:2	3.348	3.60551	3598.5	3.38	3599	0.065	1	2
#4	13	Reslice of 071521_WT_0.7uM_.nd2:2	1.885	2.02999	0	1.885	0	0.065	1	2	0.293	0.315536	363.5	363.5	0.00086805	0.052083	3.12498
x=12.94(199)	14	Reslice of 071521_WT_0.7uM_.nd2:2	2.178	2.34552	363.5	2.21	364	0.065	1	2
y=17.48(269)	16	Reslice of 071521_WT_0.7uM_.nd2:2	-0.163	-0.175537	689.5	0	0	0	0	2	2.016	2.17106	2063	2063	0.00105238	0.0631429	3.78857
	17	Reslice of 071521_WT_0.7uM_.nd2:2	1.853	1.99552	2752.5	1.885	2753	0.065	1	2
#5	19	Reslice of 071521_WT_0.7uM_.nd2:2	1.008	1.08553	2.167	1.04	2	0.065	1	2	1.039	1.11892	658.666	658.666	0.00169876	0.101926	6.11554
x=11.83(182)	20	Reslice of 071521_WT_0.7uM_.nd2:2	2.047	2.20445	660.833	2.08	661	0.065	1	2
y=32.37(498)	21	Reslice of 071521_WT_0.7uM_.nd2:2	1.268	1.36553	667.5	1.3	668	0.065	1	2	1.386	1.49261	1158.33	1158.33	0.00128858	0.0773148	4.63889
	22	Reslice of 071521_WT_0.7uM_.nd2:2	2.654	2.85813	1825.83	2.665	1826	0.065	1	2
#6	24	Reslice of 071521_WT_0.7uM_.nd2:2	0.943	1.01553	-1.5	0	0	0	0	2	1.559	1.67891	884	884	0.00189922	0.113953	6.8372
x=35.23(542)	25	Reslice of 071521_WT_0.7uM_.nd2:2	2.502	2.69444	882.5	2.535	883	0.065	1	2
y=22.3(343)	26	Reslice of 071521_WT_0.7uM_.nd2:2	-0.033	-0.0355382	904.5	0	905	0.065	1	2	2.146	2.31106	920	920	0.00251202	0.150721	9.04328
	27	Reslice of 071521_WT_0.7uM_.nd2:2	2.113	2.27552	1824.5	2.145	1825	0.065	1	2
#7	29	Reslice of 071521_WT_0.7uM_.nd2:2	1.723	1.85553	-0.5	1.755	0	0.065	1	2	1.95	2.09999	2578	2578	0.000814579	0.0488748	2.93249
x=49.66(764)	30	Reslice of 071521_WT_0.7uM_.nd2:2	3.673	3.95551	2577.5	3.705	2578	0.065	1	2
y=27.95(430)
071521_WT 0.7uM_Run 1_Depolymerization
		Label	X	X corrected	Y	BX	BY	Width	Height	Ch	Change in distance (um)	Change in distance corrected (um)	Change in Y	Change in time (s)	um/sec	um/min	um/hr
#1	2	Reslice of 071521_WT_0.7uM_.nd2:2	2.741	2.95183	1353.17	2.73	1353	0.065	1	2	-2.774	-2.98736	29.333	29.333	-0.101843	-6.11059	-366.635	6.11059
x=38.8(597)	3	Reslice of 071521_WT_0.7uM_.nd2:2	-0.033	-0.0355382	1382.5	0	1383	0.065	1	2
y=2.34(36)	4	Reslice of 071521_WT_0.7uM_.nd2:2	1.614	1.73814	2913.5	1.625	2914	0.065	1	2	-1.56	-1.67999	8	8	-0.209999	-12.5999	-755.995	12.5999
	5	Reslice of 071521_WT_0.7uM_.nd2:2	0.054	0.0581535	2921.5	0.065	2922	0.065	1	2
#2	7	Reslice of 071521_WT_0.7uM_.nd2:2	1.723	1.85553	1944.5	1.755	1945	0.065	1	2	-1.756	-1.89106	20	20	-0.0945532	-5.67319	-340.392	5.67319
x=39.2(603)	8	Reslice of 071521_WT_0.7uM_.nd2:2	-0.033	-0.0355382	1964.5	0	1965	0.065	1	2
y=2.15(33)
#3	10	Reslice of 071521_WT_0.7uM_.nd2:2	2.893	3.11552	1165.5	2.925	1166	0.065	1	2	-1.625	-1.74999	15	15	-0.116666	-6.99995	-419.997	6.99995
x=20.28(312)	11	Reslice of 071521_WT_0.7uM_.nd2:2	1.268	1.36553	1180.5	1.3	1181	0.065	1	2
y=9.69(149)
#4	14	Reslice of 071521_WT_0.7uM_.nd2:2	2.178	2.34552	363.5	2.21	364	0.065	1	2	-2.145	-2.30998	25	25	-0.0923994	-5.54396	-332.638	5.54396
x=12.94(199)	15	Reslice of 071521_WT_0.7uM_.nd2:2	0.033	0.0355382	388.5	0.065	389	0.065	1	2
y=17.48(269)	17	Reslice of 071521_WT_0.7uM_.nd2:2	1.853	1.99552	2752.5	1.885	2753	0.065	1	2	-1.886	-2.03106	10	10	-0.203106	-12.1864	-731.183	12.1864
	18	Reslice of 071521_WT_0.7uM_.nd2:2	-0.033	-0.0355382	2762.5	0	2763	0.065	1	2
#5	20	Reslice of 071521_WT_0.7uM_.nd2:2	2.047	2.20445	660.833	2.08	661	0.065	1	2	-0.779	-0.838917	6.667	6.667	-0.125831	-7.54988	-452.993	7.54988
x=11.83(182)	21	Reslice of 071521_WT_0.7uM_.nd2:2	1.268	1.36553	667.5	1.3	668	0.065	1	2
y=32.37(498)	22	Reslice of 071521_WT_0.7uM_.nd2:2	2.654	2.85813	1825.83	2.665	1826	0.065	1	2	-2.687	-2.89367	13.334	13.334	-0.217015	-13.0209	-781.253	13.0209
	23	Reslice of 071521_WT_0.7uM_.nd2:2	-0.033	-0.0355382	1839.17	0	1839	0.065	1	2
#6	25	Reslice of 071521_WT_0.7uM_.nd2:2	2.502	2.69444	882.5	2.535	883	0.065	1	2	-2.535	-2.72998	22	22	-0.12409	-7.4454	-446.724	7.4454
x=35.23(542)	26	Reslice of 071521_WT_0.7uM_.nd2:2	-0.033	-0.0355382	904.5	0	905	0.065	1	2
y=22.3(343)	27	Reslice of 071521_WT_0.7uM_.nd2:2	2.113	2.27552	1824.5	2.145	1825	0.065	1	2	-2.146	-2.31106	12	12	-0.192588	-11.5553	-693.318	11.5553
	28	Reslice of 071521_WT_0.7uM_.nd2:2	-0.033	-0.0355382	1836.5	0	1837	0.065	1	2
#7	30	Reslice of 071521_WT_0.7uM_.nd2:2	3.673	3.95551	2577.5	3.705	2578	0.065	1	2	-3.706	-3.99105	36	36	-0.110862	-6.65175	-399.105	6.65175
x=49.66(764)	31	Reslice of 071521_WT_0.7uM_.nd2:2	-0.033	-0.0355382	2613.5	0	2614	0.065	1	2
y=27.95(430)

## Sheet: WT_0.9uM rep 1
071521_WT 0.9uM_Run 1_Polymerization
		Label	X	X corrected	Y	BX	BY	Width	Height	Ch	Change in distance (um)	Change in distance corrected (um)	Change in Y	Change in time (s)	um/sec	um/min	um/hr
#1	1	Reslice of 071521_WT_0.9uM_.nd2:2	0.964	1.03815	-1.833	0	0	0	0	2	2.21	2.37998	1507	1507	0.00157929	0.0947572	5.68543
x=3.19(49)	2	Reslice of 071521_WT_0.9uM_.nd2:2	3.174	3.41813	1505.17	3.185	1505	0.065	1	2
y=12.74(196)
#2	4	Reslice of 071521_WT_0.9uM_.nd2:2	0.78	0.839994	0	0.78	0	0.065	1	2	1.398	1.50553	1402.83	1402.83	0.00107321	0.0643923	3.86354
x=14.88(229)	5	Reslice of 071521_WT_0.9uM_.nd2:2	2.178	2.34552	1402.83	2.21	1403	0.065	1	2
y=12.54(193)	6	Reslice of 071521_WT_0.9uM_.nd2:2	0.444	0.478151	1419.5	0.455	1420	0.065	1	2	1.43	1.53999	2179	2179	0.000706741	0.0424045	2.54427
	7	Reslice of 071521_WT_0.9uM_.nd2:2	1.874	2.01814	3598.5	1.885	3599	0.065	1	2
#3	8	Reslice of 071521_WT_0.9uM_.nd2:2	0.845	0.909994	0	0.845	0	0.065	1	2	1.268	1.36553	1354.5	1354.5	0.00100814	0.0604886	3.62931
x=2.41(37)	9	Reslice of 071521_WT_0.9uM_.nd2:2	2.113	2.27552	1354.5	2.145	1355	0.065	1	2
y=25.48(392)	10	Reslice of 071521_WT_0.9uM_.nd2:2	0.812	0.874456	1362.5	0.845	1363	0.065	1	2	0.781	0.841071	800	800	0.00105134	0.0630803	3.78482
	11	Reslice of 071521_WT_0.9uM_.nd2:2	1.593	1.71553	2162.5	1.625	2163	0.065	1	2
	12	Reslice of 071521_WT_0.9uM_.nd2:2	-0.033	-0.0355382	2181.5	0	2182	0.065	1	2	1.301	1.40107	1417	1417	0.000988756	0.0593254	3.55952
	13	Reslice of 071521_WT_0.9uM_.nd2:2	1.268	1.36553	3598.5	1.3	3599	0.065	1	2
#4	14	Reslice of 071521_WT_0.9uM_.nd2:1	0.65	0.699995	0	0.65	0	0.065	1	1	1.831	1.97183	1385.17	1385.17	0.00142353	0.0854121	5.12472
x=25.94(399)	15	Reslice of 071521_WT_0.9uM_.nd2:1	2.481	2.67183	1385.17	2.47	1385	0.065	1	1
y=25.87(398)
#5	17	Reslice of 071521_WT_0.9uM_.nd2:2	0.13	0.139999	2	0.13	2	0.065	1	2	3.348	3.60551	3099.5	3099.5	0.00116326	0.0697954	4.18772
x=25.74(396)	18	Reslice of 071521_WT_0.9uM_.nd2:2	3.478	3.74551	3101.5	3.51	3102	0.065	1	2
y=33.28(512)
071521_WT 0.9uM_Run 1_Depolymerization
		Label	X	X corrected	Y	BX	BY	Width	Height	Ch	Change in distance (um)	Change in distance corrected (um)	Change in Y	Change in time (s)	um/sec	um/min	um/hr
#1	2	Reslice of 071521_WT_0.9uM_.nd2:2	3.174	3.41813	1505.17	3.185	1505	0.065	1	2	-3.207	-3.45367	19.666	19.666	-0.175616	-10.537	-632.218	10.537
x=3.19(49)	3	Reslice of 071521_WT_0.9uM_.nd2:2	-0.033	-0.0355382	1524.83	0	1525	0.065	1	2
y=12.74(196)
#2	5	Reslice of 071521_WT_0.9uM_.nd2:2	2.178	2.34552	1402.83	2.21	1403	0.065	1	2	-1.734	-1.86737	16.667	16.667	-0.11204	-6.7224	-403.344	6.7224
x=14.88(229)	6	Reslice of 071521_WT_0.9uM_.nd2:2	0.444	0.478151	1419.5	0.455	1420	0.065	1	2
y=12.54(193)
#3	9	Reslice of 071521_WT_0.9uM_.nd2:2	2.113	2.27552	1354.5	2.145	1355	0.065	1	2	-1.301	-1.40107	8	8	-0.175133	-10.508	-630.48	10.508
x=2.41(37)	10	Reslice of 071521_WT_0.9uM_.nd2:2	0.812	0.874456	1362.5	0.845	1363	0.065	1	2
y=25.48(392)	11	Reslice of 071521_WT_0.9uM_.nd2:2	1.593	1.71553	2162.5	1.625	2163	0.065	1	2	-1.626	-1.75107	19	19	-0.0921613	-5.52968	-331.781	5.52968
	12	Reslice of 071521_WT_0.9uM_.nd2:2	-0.033	-0.0355382	2181.5	0	2182	0.065	1	2
#4	15	Reslice of 071521_WT_0.9uM_.nd2:1	2.481	2.67183	1385.17	2.47	1385	0.065	1	1	-2.427	-2.61367	12	12	-0.217806	-13.0684	-784.102	13.0684
x=25.94(399)	16	Reslice of 071521_WT_0.9uM_.nd2:1	0.054	0.0581535	1397.17	0.065	1397	0.065	1	1
y=25.87(398)
#5	18	Reslice of 071521_WT_0.9uM_.nd2:2	3.478	3.74551	3101.5	3.51	3102	0.065	1	2	-1.95	-2.09999	16	16	-0.131249	-7.87495	-472.497	7.87495
x=25.74(396)	19	Reslice of 071521_WT_0.9uM_.nd2:2	1.528	1.64553	3117.5	1.56	3118	0.065	1	2
y=33.28(512)

## Sheet: WT_0.9uM rep 2
071521_WT 0.9uM_Run 2_Polymerization
		Label	X	X corrected	Y	BX	BY	Width	Height	Ch	Change in distance (um)	Change in distance corrected (um)	Change in Y	Change in time (s)	um/sec	um/min	um/hr
#6	20	Reslice of 071521_WT_0.9uM_.nd2:2	0.488	0.525535	0.5	0.52	1	0.065	1	2	0.455	0.489997	289	289	0.00169549	0.101729	6.10376
x=31.79(489)	21	Reslice of 071521_WT_0.9uM_.nd2:2	0.943	1.01553	289.5	0.975	290	0.065	1	2
y=28.14(433)	22	Reslice of 071521_WT_0.9uM_.nd2:2	0.033	0.0355382	296.5	0.065	297	0.065	1	2	3.77	4.05997	3302	3302	0.00122955	0.073773	4.42638
	23	Reslice of 071521_WT_0.9uM_.nd2:2	3.803	4.09551	3598.5	3.835	3599	0.065	1	2
#7	24	Reslice of 071521_WT_0.9uM_.nd2:2	1.95	2.09999	2	1.95	2	0.065	1	2	1.398	1.50553	713.5	713.5	0.00211006	0.126604	7.59622
x=33.8(520)	25	Reslice of 071521_WT_0.9uM_.nd2:2	3.348	3.60551	715.5	3.38	716	0.065	1	2
y=21.32(328)	26	Reslice of 071521_WT_0.9uM_.nd2:2	0.228	0.245537	730.167	0.26	730	0.065	1	2	2.426	2.6126	1261.67	1261.67	0.00207075	0.124245	7.45471
	27	Reslice of 071521_WT_0.9uM_.nd2:2	2.654	2.85813	1991.83	2.665	1992	0.065	1	2
	28	Reslice of 071521_WT_0.9uM_.nd2:2	1.528	1.64553	1999.83	1.56	2000	0.065	1	2	1.993	2.14629	1599.33	1599.33	0.00134199	0.0805195	4.83117
	29	Reslice of 071521_WT_0.9uM_.nd2:2	3.521	3.79182	3599.17	3.51	3599	0.065	1	2
#8	30	Reslice of 071521_WT_0.9uM_.nd2:1	1.04	1.11999	1	1.04	1	0.065	1	1	1.788	1.92553	1417.83	1417.83	0.00135808	0.0814846	4.88907
x=32.11(494)	31	Reslice of 071521_WT_0.9uM_.nd2:1	2.828	3.04552	1418.83	2.86	1419	0.065	1	1
y=17.55(270)
#11	39	Reslice of 071521_WT_0.9uM_.nd2:2	-0.076	-0.0818456	562.5	0	0	0	0	2	1.993	2.14629	1354	1354	0.00158515	0.095109	5.70654
x=61.23(942)	40	Reslice of 071521_WT_0.9uM_.nd2:2	1.917	2.06445	1916.5	1.95	1917	0.065	1	2
y=22.23(342)
#12	42	Reslice of 071521_WT_0.9uM_.nd2:2	0.715	0.769995	0	0.715	0	0.065	1	2	1.528	1.64553	1017.5	1017.5	0.00161723	0.0970335	5.82201
x=52.07(801)	43	Reslice of 071521_WT_0.9uM_.nd2:2	2.243	2.41552	1017.5	2.275	1018	0.065	1	2
y=27.3(420)	44	Reslice of 071521_WT_0.9uM_.nd2:2	1.137	1.22445	1027.5	1.17	1028	0.065	1	2	1.365	1.46999	1213	1213	0.00121186	0.0727118	4.36271
	45	Reslice of 071521_WT_0.9uM_.nd2:2	2.502	2.69444	2240.5	2.535	2241	0.065	1	2
071521_WT 0.9uM_Run 2_Depolymerization
		Label	X	X corrected	Y	BX	BY	Width	Height	Ch	Change in distance (um)	Change in distance corrected (um)	Change in Y	Change in time (s)	um/sec	um/min	um/hr
#6	21	Reslice of 071521_WT_0.9uM_.nd2:2	0.943	1.01553	289.5	0.975	290	0.065	1	2	-0.91	-0.979993	7	7	-0.139999	-8.39994	-503.997	8.39994
x=31.79(489)	22	Reslice of 071521_WT_0.9uM_.nd2:2	0.033	0.0355382	296.5	0.065	297	0.065	1	2
y=28.14(433)
#7	25	Reslice of 071521_WT_0.9uM_.nd2:2	3.348	3.60551	715.5	3.38	716	0.065	1	2	-3.12	-3.35998	14.667	14.667	-0.229084	-13.745	-824.703	13.745
x=33.8(520)	26	Reslice of 071521_WT_0.9uM_.nd2:2	0.228	0.245537	730.167	0.26	730	0.065	1	2
y=21.32(328)	27	Reslice of 071521_WT_0.9uM_.nd2:2	2.654	2.85813	1991.83	2.665	1992	0.065	1	2	-1.126	-1.21261	8	8	-0.151576	-9.09455	-545.673	9.09455
	28	Reslice of 071521_WT_0.9uM_.nd2:2	1.528	1.64553	1999.83	1.56	2000	0.065	1	2
#8	31	Reslice of 071521_WT_0.9uM_.nd2:1	2.828	3.04552	1418.83	2.86	1419	0.065	1	1	-1.56	-1.67999	12	12	-0.139999	-8.39994	-503.997	8.39994
x=32.11(494)	32	Reslice of 071521_WT_0.9uM_.nd2:1	1.268	1.36553	1430.83	1.3	1431	0.065	1	1
y=17.55(270)
#9	34	Reslice of 071521_WT_0.9uM_.nd2:2	2.264	2.43814	1524.17	2.275	1524	0.065	1	2	-2.253	-2.42629	26	26	-0.0933189	-5.59913	-335.948	5.59913
x=36.47(561)	35	Reslice of 071521_WT_0.9uM_.nd2:2	0.011	0.0118461	1550.17	0	1550	0.065	1	2
y=13.97(215)
#10	37	Reslice of 071521_WT_0.9uM_.nd2:2	3.803	4.09551	2926.5	3.835	2927	0.065	1	2	-3.901	-4.20105	26	26	-0.161579	-9.69473	-581.684	9.69473
x=48.88(752)	38	Reslice of 071521_WT_0.9uM_.nd2:2	-0.098	-0.105538	2952.5	0	0	0	0	2
y=10.27(158)
#11	40	Reslice of 071521_WT_0.9uM_.nd2:2	1.917	2.06445	1916.5	1.95	1917	0.065	1	2	-1.603	-1.7263	7.333	7.333	-0.235415	-14.1249	-847.493	14.1249
x=61.23(942)	41	Reslice of 071521_WT_0.9uM_.nd2:2	0.314	0.338152	1923.83	0.325	1924	0.065	1	2
y=22.23(342)
#12	43	Reslice of 071521_WT_0.9uM_.nd2:2	2.243	2.41552	1017.5	2.275	1018	0.065	1	2	-1.106	-1.19107	10	10	-0.119107	-7.14641	-428.785	7.14641
x=52.07(801)	44	Reslice of 071521_WT_0.9uM_.nd2:2	1.137	1.22445	1027.5	1.17	1028	0.065	1	2
y=27.3(420)	45	Reslice of 071521_WT_0.9uM_.nd2:2	2.502	2.69444	2240.5	2.535	2241	0.065	1	2	-2.535	-2.72998	29	29	-0.0941373	-5.64824	-338.894	5.64824
	46	Reslice of 071521_WT_0.9uM_.nd2:2	-0.033	-0.0355382	2269.5	0	2270	0.065	1	2

## Sheet: WT_0.9uM rep 3
071921_WT 0.9uM_Run 1_Polymerization
		Label	X	X corrected	Y	BX	BY	Width	Height	Ch	Change in distance (um)	Change in distance corrected (um)	Change in Y	Change in time (s)	um/sec	um/min	um/hr
#1	1	Reslice of 071921_WT_0.9uM_.tif:2	0.488	0.525535	-0.5	0.52	0	0.065	1	2	0.227	0.24446	105	105	0.00232819	0.139691	8.38148
x=8.32(128)	2	Reslice of 071921_WT_0.9uM_.tif:2	0.715	0.769995	104.5	0.715	105	0.065	1	2
y=2.6(40)	3	Reslice of 071921_WT_0.9uM_.tif:2	0.228	0.245537	109	0.26	109	0.065	1	2	3.64	3.91997	2257.5	2257.5	0.00173642	0.104185	6.25112
	4	Reslice of 071921_WT_0.9uM_.tif:2	3.868	4.16551	2366.5	3.9	2367	0.065	1	2
#2	6	Reslice of 071921_WT_0.9uM_.tif:2	1.56	1.67999	0	1.56	0	0.065	1	2	0.878	0.945532	726.5	726.5	0.00130149	0.0780894	4.68536
x=15.93(245)	7	Reslice of 071921_WT_0.9uM_.tif:2	2.438	2.62552	726.5	2.47	727	0.065	1	2
y=6.89(106)	8	Reslice of 071921_WT_0.9uM_.tif:2	1.397	1.50445	731.167	1.43	731	0.065	1	2	1.041	1.12107	1146.33	1146.33	0.000977961	0.0586777	3.52066
	9	Reslice of 071921_WT_0.9uM_.tif:2	2.438	2.62552	1877.5	2.47	1878	0.065	1	2
	10	Reslice of 071921_WT_0.9uM_.tif:2	0.921	0.991839	1892.83	0.91	1893	0.065	1	2	1.907	2.05368	1430.67	1430.67	0.00143547	0.0861281	5.16769
	11	Reslice of 071921_WT_0.9uM_.tif:2	2.828	3.04552	3323.5	2.86	3324	0.065	1	2
#3	13	Reslice of 071921_WT_0.9uM_.tif:2	1.17	1.25999	0	1.17	0	0.065	1	2	5.428	5.8455	3598.5	3598.5	0.00162443	0.0974656	5.84794
x=22.16(341)	14	Reslice of 071921_WT_0.9uM_.tif:2	6.598	7.10549	3598.5	6.63	3599	0.065	1	2
y=9.69(149)
#4	15	Reslice of 071921_WT_0.9uM_.tif:2	0.325	0.349998	256	0.325	256	0.065	1	2	3.954	4.25812	3343.17	3343.17	0.00127368	0.0764208	4.58525
x=6.63(102)	16	Reslice of 071921_WT_0.9uM_.tif:2	4.279	4.60812	3599.17	4.29	3599	0.065	1	2
y=18.59(286)
#6	19	Reslice of 071921_WT_0.9uM_.tif:2	1.43	1.53999	0	1.43	0	0.065	1	2	3.564	3.83813	2570.83	2570.83	0.00149295	0.0895771	5.37462
x=35.62(548)	20	Reslice of 071921_WT_0.9uM_.tif:2	4.994	5.37812	2570.83	5.005	2571	0.065	1	2
y=24.64(379)	21	Reslice of 071921_WT_0.9uM_.tif:2	2.394	2.57814	2589.5	2.405	2590	0.065	1	2	1.213	1.3063	987	987	0.0013235	0.0794103	4.76462
	22	Reslice of 071921_WT_0.9uM_.tif:2	3.607	3.88444	3576.5	3.64	3577	0.065	1	2
#7	23	Reslice of 071921_WT_0.9uM_.tif:2	1.69	1.81999	1	1.69	1	0.065	1	2	1.917	2.06445	1898.17	1898.17	0.0010876	0.065256	3.91536
x=35.95(553)	24	Reslice of 071921_WT_0.9uM_.tif:2	3.607	3.88444	1899.17	3.64	1899	0.065	1	2
y=34.38(529)	25	Reslice of 071921_WT_0.9uM_.tif:2	1.528	1.64553	1914.5	1.56	1915	0.065	1	2	1.126	1.21261	1260.67	1260.67	0.000961877	0.0577126	3.46276
	26	Reslice of 071921_WT_0.9uM_.tif:2	2.654	2.85813	3175.17	2.665	3175	0.065	1	2
#8	27	Reslice of 071921_WT_0.9uM_.tif:2	1.885	2.02999	1	1.885	1	0.065	1	2	3.001	3.23182	2750.5	2750.5	0.001175	0.0704997	4.22998
x=44.59(686)	28	Reslice of 071921_WT_0.9uM_.tif:2	4.886	5.26181	2751.5	4.875	2752	0.065	1	2
y=13.52(208)
071921_WT 0.9uM_Run 1_Depolymerization
		Label	X	X corrected	Y	BX	BY	Width	Height	Ch	Change in distance (um)	Change in distance corrected (um)	Change in Y	Change in time (s)	um/sec	um/min	um/hr	um/min
#1	2	Reslice of 071921_WT_0.9uM_.tif:2	0.715	0.769995	104.5	0.715	105	0.065	1	2	-0.487	-0.524458	4.5	4.5	-0.116546	-6.99277	-419.566	6.99277
x=8.32(128)	3	Reslice of 071921_WT_0.9uM_.tif:2	0.228	0.245537	109	0.26	109	0.065	1	2
y=2.6(40)	4	Reslice of 071921_WT_0.9uM_.tif:2	3.868	4.16551	2366.5	3.9	2367	0.065	1	2	-1.951	-2.10106	12.5	12.5	-0.168085	-10.0851	-605.106	10.0851
	5	Reslice of 071921_WT_0.9uM_.tif:2	1.917	2.06445	2379	1.95	2379	0.065	1	2
#2	7	Reslice of 071921_WT_0.9uM_.tif:2	2.438	2.62552	726.5	2.47	727	0.065	1	2	-1.041	-1.12107	4.667	4.667	-0.240212	-14.4127	-864.763	14.4127
x=15.93(245)	8	Reslice of 071921_WT_0.9uM_.tif:2	1.397	1.50445	731.167	1.43	731	0.065	1	2
y=6.89(106)	9	Reslice of 071921_WT_0.9uM_.tif:2	2.438	2.62552	1877.5	2.47	1878	0.065	1	2	-1.517	-1.63368	15.333	15.333	-0.106547	-6.3928	-383.568	6.3928
	10	Reslice of 071921_WT_0.9uM_.tif:2	0.921	0.991839	1892.83	0.91	1893	0.065	1	2
	11	Reslice of 071921_WT_0.9uM_.tif:2	2.828	3.04552	3323.5	2.86	3324	0.065	1	2	-2.297	-2.47368	14	14	-0.176691	-10.6015	-636.088	10.6015
	12	Reslice of 071921_WT_0.9uM_.tif:2	0.531	0.571842	3337.5	0.52	3338	0.065	1	2
#6	20	Reslice of 071921_WT_0.9uM_.tif:2	4.994	5.37812	2570.83	5.005	2571	0.065	1	2	-2.6	-2.79998	18.667	18.667	-0.149996	-8.99978	-539.987	8.99978
x=35.62(548)	21	Reslice of 071921_WT_0.9uM_.tif:2	2.394	2.57814	2589.5	2.405	2590	0.065	1	2
y=24.64(379)
#7	24	Reslice of 071921_WT_0.9uM_.tif:2	3.607	3.88444	1899.17	3.64	1899	0.065	1	2	-2.079	-2.23891	15.333	15.333	-0.146019	-8.76113	-525.668	8.76113
x=35.95(553)	25	Reslice of 071921_WT_0.9uM_.tif:2	1.528	1.64553	1914.5	1.56	1915	0.065	1	2
y=34.38(529)
#8	28	Reslice of 071921_WT_0.9uM_.tif:2	4.886	5.26181	2751.5	4.875	2752	0.065	1	2	-4.767	-5.13366	48	48	-0.106951	-6.41707	-385.024	6.41707
x=44.59(686)	29	Reslice of 071921_WT_0.9uM_.tif:2	0.119	0.128153	2799.5	0.13	2800	0.065	1	2
y=13.52(208)

## Sheet: V410I_0.5uM rep 1
052521_V410I 0.5uM_Run 1_Polymerization
		Label	X	X corrected	Y	BX	BY	Width	Height	Ch	Change in distance (um)	Change in distance corrected (um)	Change in Y	Change in time (s)	um/sec	um/min	um/hr
#1	1	Reslice of 052521_V410I 0.5uM.nd2:1	1.82	1.95999	2	1.82	2	0.065	1	1	0.227	0.24446	401.5	401.5	0.000608866	0.036532	2.19192
x=33.15(510)	2	Reslice of 052521_V410I 0.5uM.nd2:1	2.047	2.20445	403.5	2.08	404	0.065	1	1
y=13.71(211)
#2	4	Reslice of 052521_V410I 0.5uM.nd2:1	1.3	1.39999	0	1.3	0	0.065	1	1	0.163	0.175537	468.5	468.5	0.000374679	0.0224808	1.34885
x=49.20(757)	5	Reslice of 052521_V410I 0.5uM.nd2:1	1.463	1.57553	468.5	1.495	469	0.065	1	1
y=29.05(447)
#3	7	Reslice of 052521_V410I 0.5uM.nd2:1	1.105	1.18999	2	1.105	2	0.065	1	1	0.423	0.455535	349.5	349.5	0.00130339	0.0782035	4.69221
x=11.44(176)	8	Reslice of 052521_V410I 0.5uM.nd2:1	1.528	1.64553	351.5	1.56	352	0.065	1	1
y=5.40(83)
052521_V410I 0.5uM_Run 1_Depolymerization
		Label	X	X corrected	Y	BX	BY	Width	Height	Ch	Change in distance (um)	Change in distance corrected (um)	Change in Y	Change in time (s)	um/sec	um/min	um/hr
#1	2	Reslice of 052521_V410I 0.5uM.nd2:1	2.047	2.20445	403.5	2.08	404	0.065	1	1	-2.014	-2.16891	13	13	-0.166839	-10.0103	-600.621	10.0103
x=33.15(510)	3	Reslice of 052521_V410I 0.5uM.nd2:1	0.033	0.0355382	416.5	0.065	417	0.065	1	1
y=13.71(211)
#2	5	Reslice of 052521_V410I 0.5uM.nd2:1	1.463	1.57553	468.5	1.495	469	0.065	1	1	-1.496	-1.61107	13	13	-0.123928	-7.43569	-446.141	7.43569
x=49.20(757)	6	Reslice of 052521_V410I 0.5uM.nd2:1	-0.033	-0.0355382	481.5	0	482	0.065	1	1
y=29.05(447)
#3	8	Reslice of 052521_V410I 0.5uM.nd2:1	1.528	1.64553	351.5	1.56	352	0.065	1	1	-1.495	-1.60999	8	8	-0.201249	-12.0749	-724.495	12.0749
x=11.44(176)	9	Reslice of 052521_V410I 0.5uM.nd2:1	0.033	0.0355382	359.5	0.065	360	0.065	1	1
y=5.40(83)

[truncated: 17 more sheets: V410I_0.5uM rep 2, V410I_0.5uM rep 3, V410I_0.7uM rep 1, V410I_0.7uM rep 2, V410I_0.7uM rep 3, V410I_0.9uM rep 1, V410I_0.9uM rep 2, V410I_0.9uM rep 3, V410A_0.5uM total rep 1, V410A_0.5uM total rep 2, V410A_0.5uM total rep 3, V410A_0.7uM total rep 1, V410A_0.7uM total rep 2, V410A_0.7uM total rep 3, V410A_0.9uM total rep 1, V410A_0.9uM total rep 2, V410A_0.9uM total rep 3]
