# Supplementary material for: TUBA1A tubulinopathy mutants disrupt neuron morphogenesis and override XMAP215/Stu2 regulation of microtubule dynamics
Source: eLife journal article supplement (doi:10.7554/elife.76189), 2022-05-05
Supplement: supp [file elife-76189-supp-v1.zip]

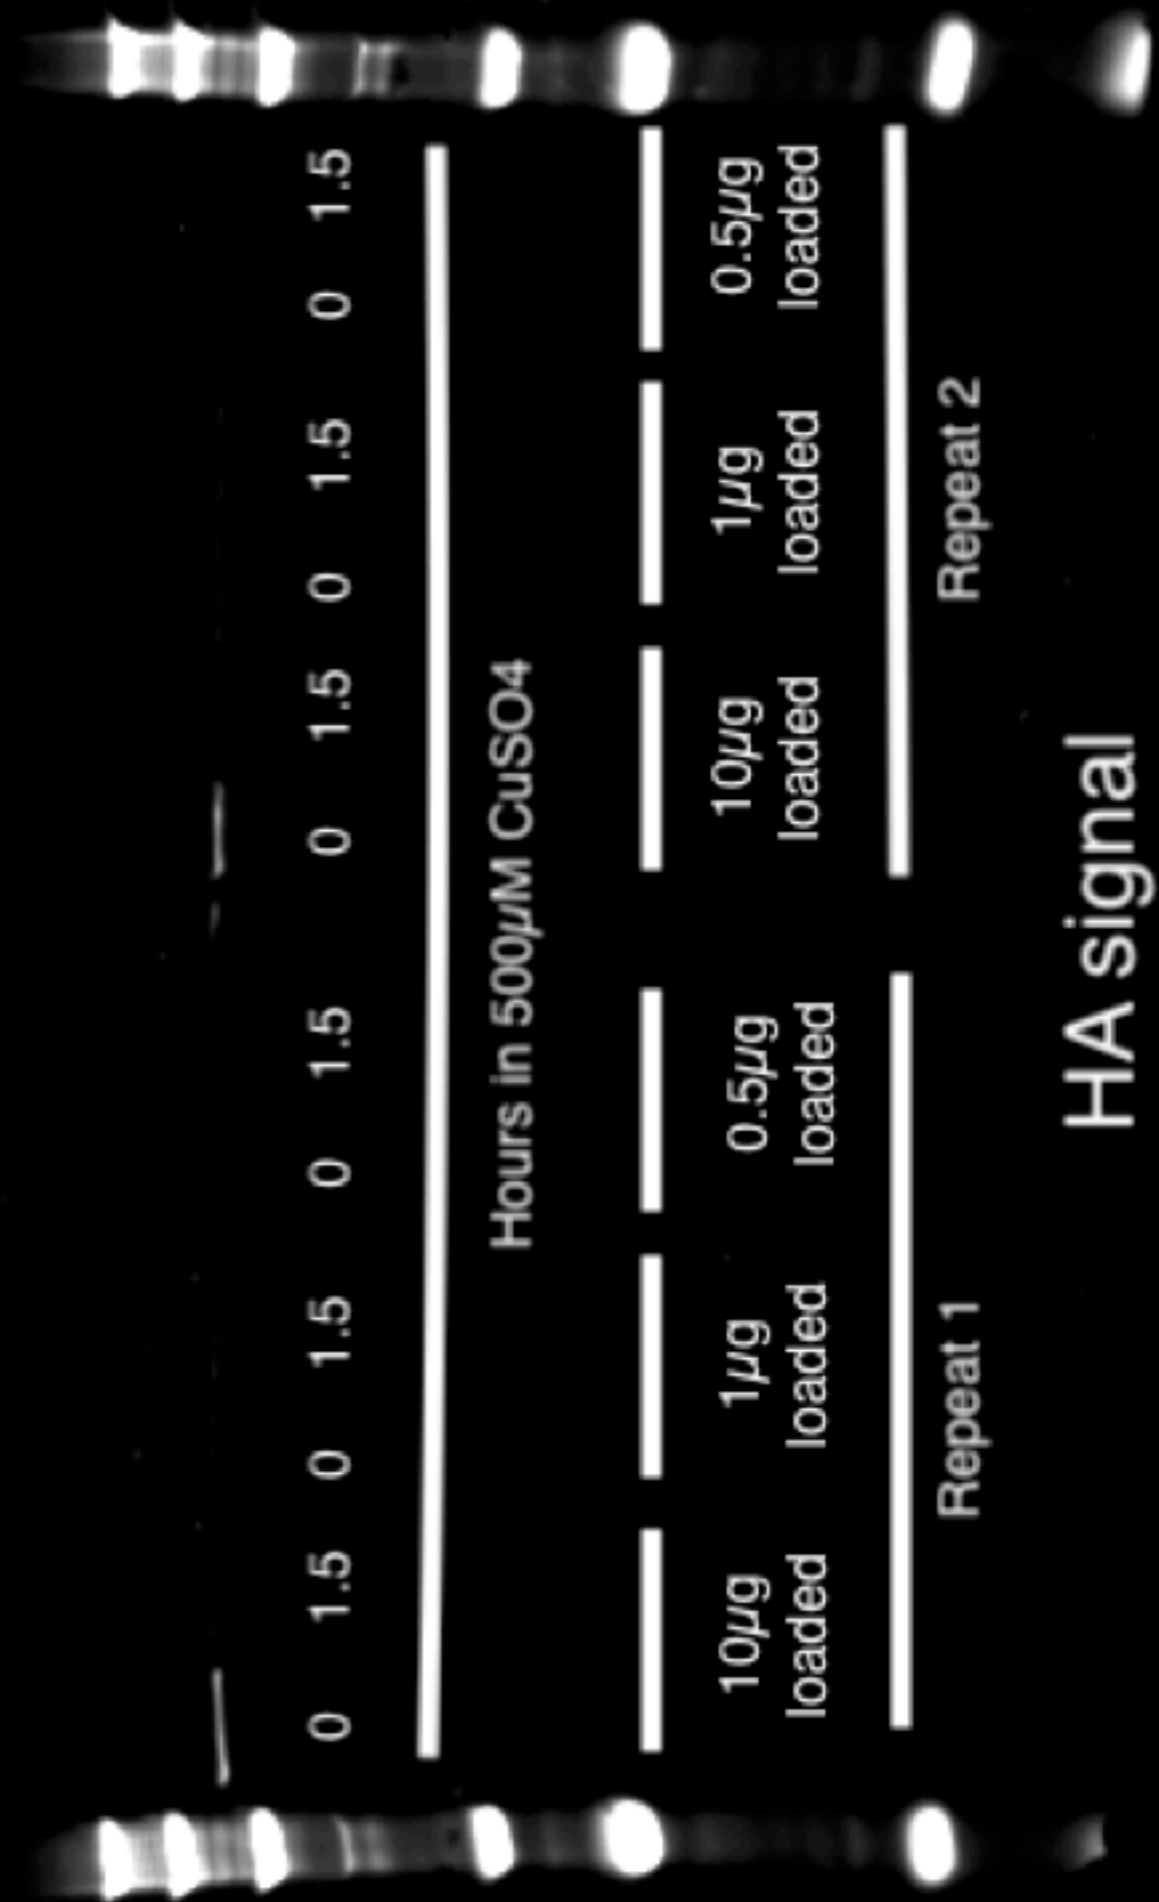

0 1.5 0 1.5 0 1.5 0 1.5 0 1.5

Hours in 500µM CuSO4

10µg loaded 1µg loaded 0.5µg loaded  
10µg loaded 1µg loaded 0.5µg loaded

Repeat 1

Repeat 2

HA signal

Repeat 1

10 $\mu$ g  
loaded

1 $\mu$ g  
loaded

0.5 $\mu$ g  
loaded

Repeat 2

0.5 $\mu$ g  
loaded

1 $\mu$ g  
loaded

10 $\mu$ g  
loaded

0 1.5 0 1.5 0 1.5 0 1.5 0 1.5

Hours in 500 $\mu$ M CuSO<sub>4</sub>

Zwf1 signal
