# Supplementary material for: TUBA1A tubulinopathy mutants disrupt neuron morphogenesis and override XMAP215/Stu2 regulation of microtubule dynamics
Source: eLife journal article supplement (doi:10.7554/elife.76189), 2022-05-05
Supplement: supp [file elife-76189-supp-v1.zip]

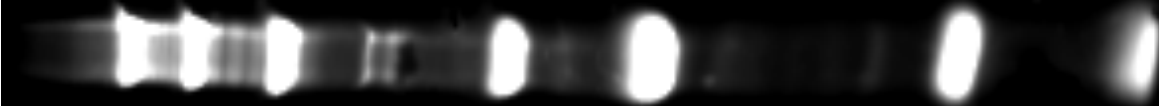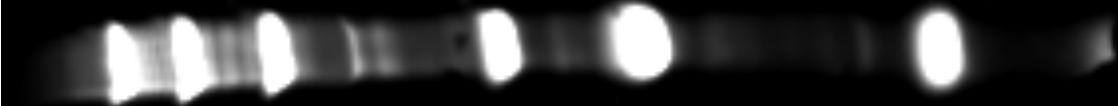

1. The first line shows a regular rhythm with a rate of approximately 75 bpm. The P waves are upright and the QRS complexes are narrow. This is a normal sinus rhythm.

2. The second line shows a regular rhythm with a rate of approximately 75 bpm. The P waves are upright and the QRS complexes are narrow. This is a normal sinus rhythm.

3. The third line shows a regular rhythm with a rate of approximately 75 bpm. The P waves are upright and the QRS complexes are narrow. This is a normal sinus rhythm.

4. The fourth line shows a regular rhythm with a rate of approximately 75 bpm. The P waves are upright and the QRS complexes are narrow. This is a normal sinus rhythm.

5. The fifth line shows a regular rhythm with a rate of approximately 75 bpm. The P waves are upright and the QRS complexes are narrow. This is a normal sinus rhythm.

6. The sixth line shows a regular rhythm with a rate of approximately 75 bpm. The P waves are upright and the QRS complexes are narrow. This is a normal sinus rhythm.

7. The seventh line shows a regular rhythm with a rate of approximately 75 bpm. The P waves are upright and the QRS complexes are narrow. This is a normal sinus rhythm.

8. The eighth line shows a regular rhythm with a rate of approximately 75 bpm. The P waves are upright and the QRS complexes are narrow. This is a normal sinus rhythm.

9. The ninth line shows a regular rhythm with a rate of approximately 75 bpm. The P waves are upright and the QRS complexes are narrow. This is a normal sinus rhythm.

10. The tenth line shows a regular rhythm with a rate of approximately 75 bpm. The P waves are upright and the QRS complexes are narrow. This is a normal sinus rhythm.
