# Supplementary figures and images for: TUBA1A tubulinopathy mutants disrupt neuron morphogenesis and override XMAP215/Stu2 regulation of microtubule dynamics
Source: eLife journal article supplement (doi:10.7554/elife.76189), 2022-05-05

Figure 5-figure supplement 1.

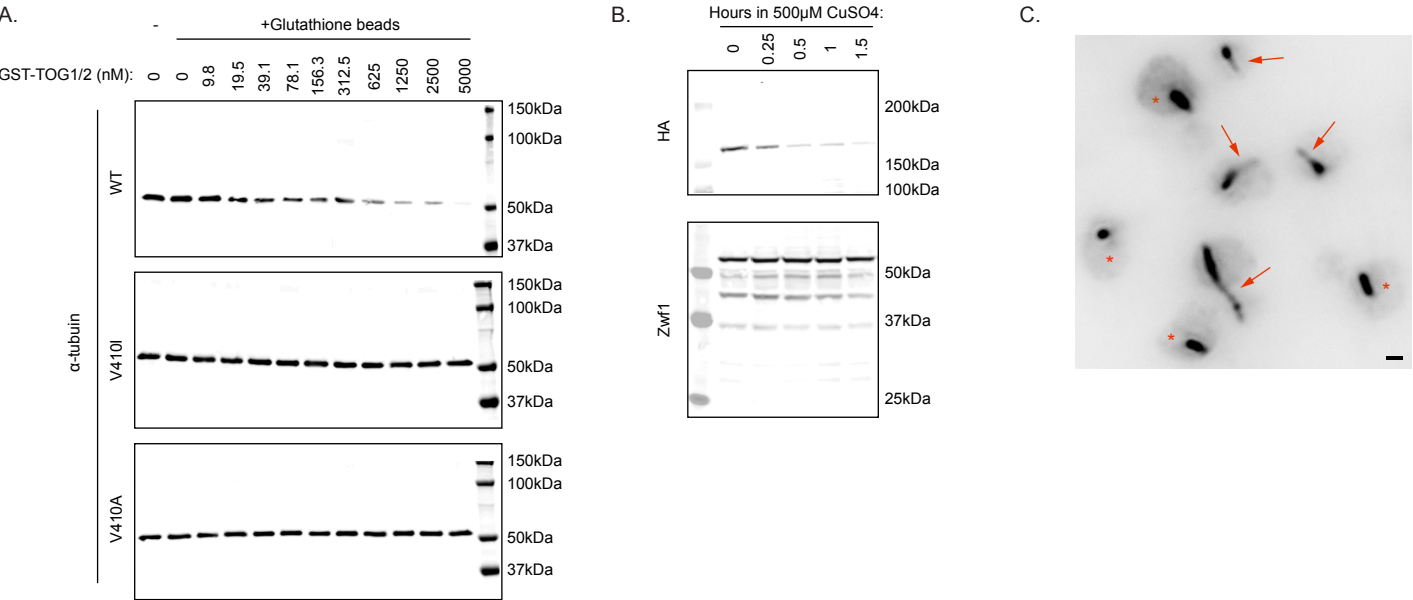

Supplement: supp [file elife-76189-supp-v1.zip]

Figure 2-figure supplement 1.

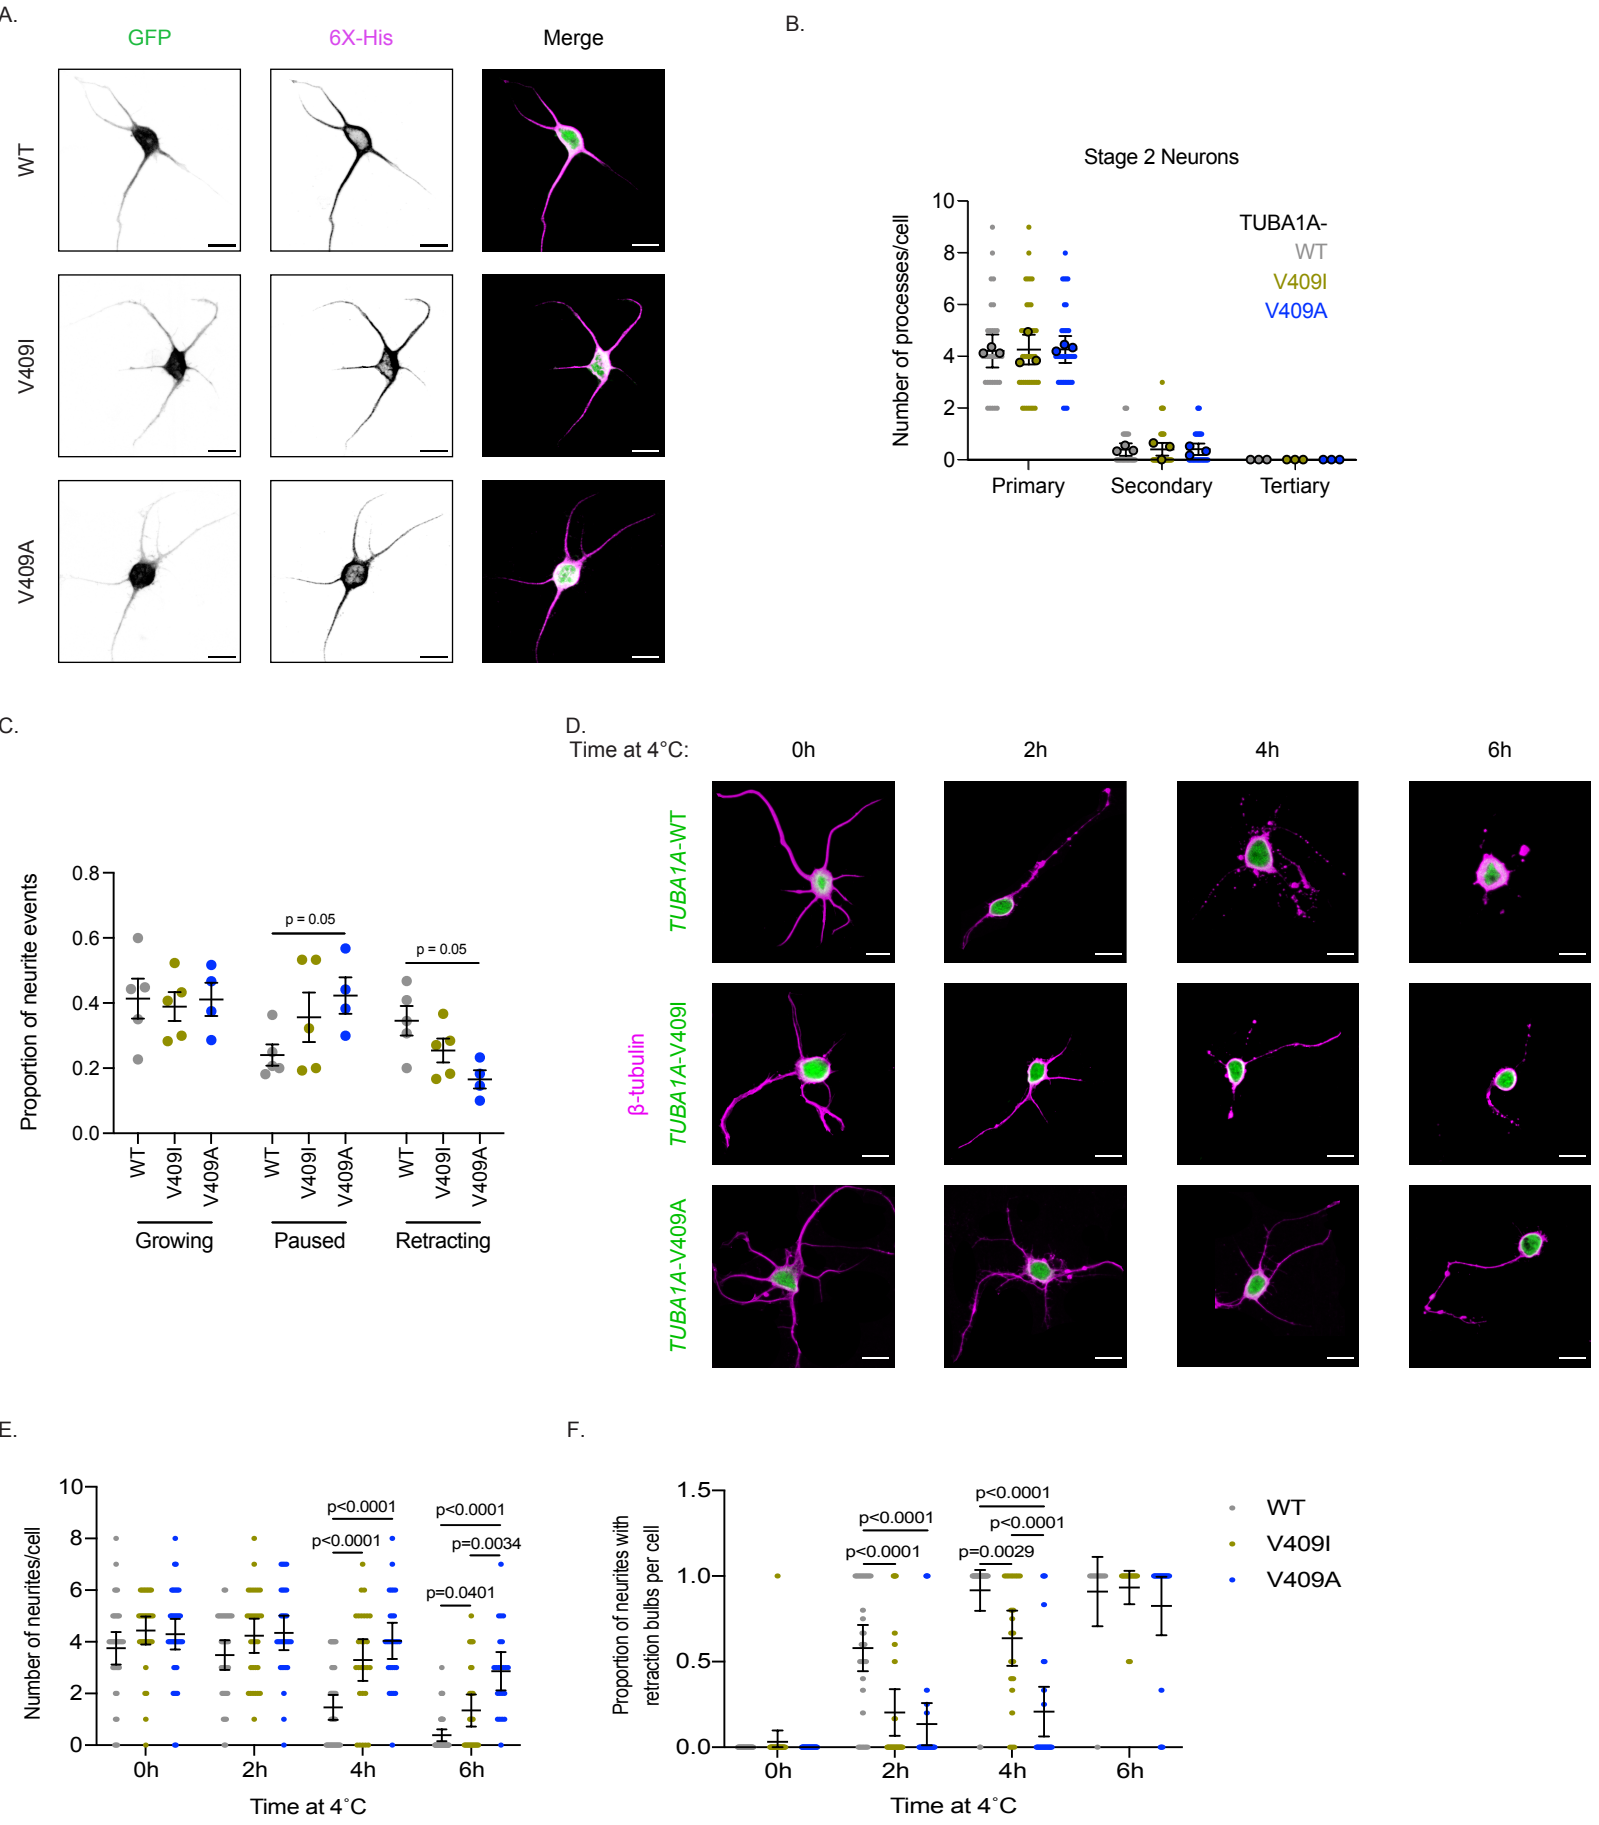

Supplement: supp [file elife-76189-supp-v1.zip]

Figure 3-figure supplement 1.

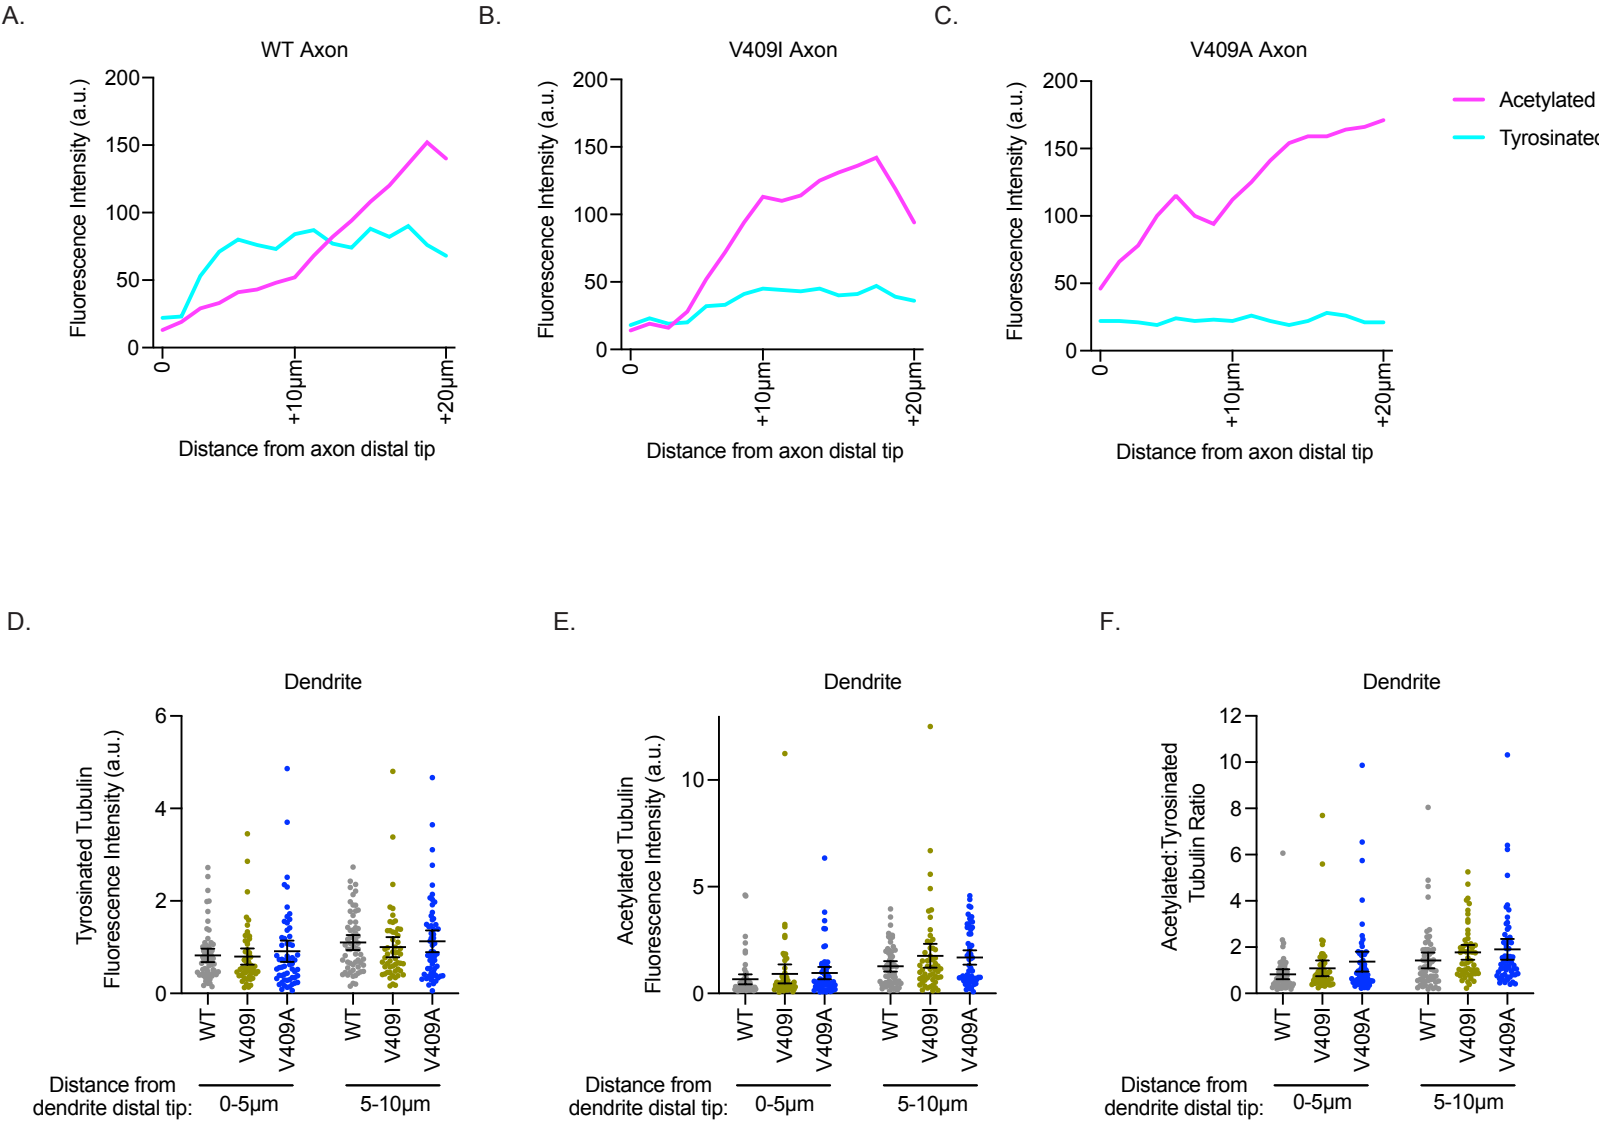

Supplement: supp [file elife-76189-supp-v1.zip]

Figure 1-figure supplement 1.

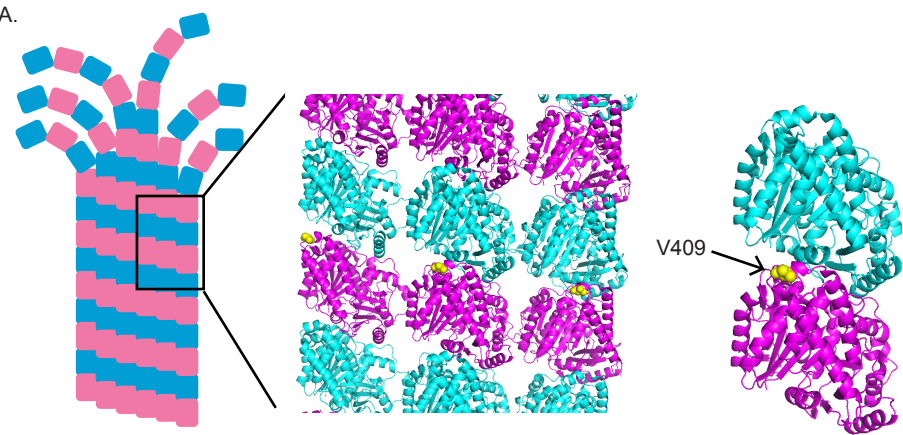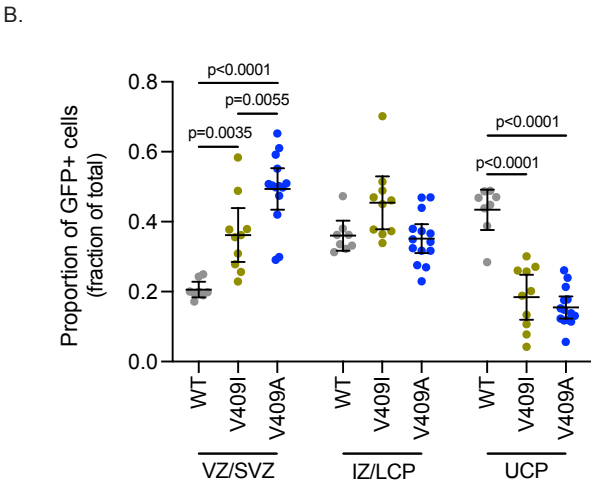

Supplement: supp [file elife-76189-supp-v1.zip]

Figure 4-figure supplement 1.

A.

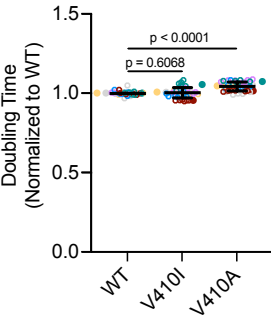

Supplement: supp [file elife-76189-supp-v1.zip]
